# Supplementary material for: Regulation of store-operated Ca2+ entry by IP3 receptors independent of their ability to release Ca2+
Source: eLife journal article supplement (doi:10.7554/elife.80447), 2023-07-19
Supplement: fig1-figsupp1-data1 [file Figure 1- figure supplement 1- data 1.xlsx]

## Sheet: Figure S1A
NS shRNA hNPC	0.124874	0.12512	0.12224	0.120765	0.119837	0.119309	0.11858	0.118107	0.118452	0.119164	0.119699	0.120314	0.120359	0.120568	0.120364	0.120704	0.120788	0.120994	0.121407	0.122362	0.122223	0.121771	0.122286	0.122584	0.122597	0.125154	0.123803	0.13022	0.129594	0.127848	0.128864	0.129269	0.128644	0.128898	0.128964	0.129488	0.129768	0.13007	0.130476	0.131026	0.131374	0.132722	0.134513	0.135394	0.134035	0.133189	0.133206	0.132465	0.132207
	0.124452	0.124982	0.122278	0.120896	0.119554	0.119315	0.118292	0.117406	0.118011	0.118511	0.119171	0.119949	0.120131	0.120088	0.119767	0.119878	0.119416	0.119456	0.119948	0.120307	0.120258	0.120264	0.120665	0.121019	0.12113	0.123283	0.122203	0.128029	0.127093	0.125324	0.125959	0.126613	0.125699	0.125631	0.125792	0.125846	0.125861	0.126076	0.125963	0.126325	0.126603	0.127818	0.129546	0.130502	0.129226	0.128509	0.128509	0.127933	0.127627
	0.126367	0.126396	0.124017	0.12237	0.121135	0.121159	0.120031	0.119527	0.120286	0.120511	0.121287	0.122282	0.122531	0.122754	0.122571	0.122866	0.1224	0.122929	0.123345	0.124064	0.123816	0.123806	0.124316	0.124601	0.124767	0.127253	0.125907	0.132359	0.131564	0.129961	0.130189	0.131607	0.131228	0.131265	0.131987	0.132003	0.13267	0.133248	0.133756	0.13443	0.134899	0.136254	0.137897	0.138707	0.137837	0.136558	0.136298	0.136086	0.13526
	0.121257	0.12174	0.119049	0.117657	0.116665	0.116273	0.115162	0.114744	0.115404	0.115747	0.116422	0.117221	0.117583	0.117509	0.11746	0.117671	0.11721	0.117426	0.118042	0.118499	0.118562	0.118395	0.118952	0.119171	0.119512	0.120911	0.119737	0.125523	0.124662	0.12308	0.123847	0.124531	0.123528	0.123665	0.123846	0.124022	0.124137	0.124383	0.124688	0.125054	0.125398	0.126655	0.128224	0.128938	0.1276	0.126839	0.126883	0.126136	0.125659
	0.126573	0.127576	0.124869	0.123423	0.122339	0.122045	0.121365	0.120336	0.121094	0.120748	0.121621	0.122568	0.122519	0.122676	0.121966	0.122026	0.121369	0.121289	0.121787	0.122351	0.122645	0.122166	0.122685	0.123043	0.123049	0.123807	0.122509	0.128683	0.127405	0.12562	0.126238	0.126574	0.125596	0.125799	0.125785	0.125964	0.126065	0.126339	0.12662	0.127227	0.127496	0.128517	0.130417	0.131211	0.129925	0.128762	0.128669	0.127846	0.127341
	0.126136	0.126823	0.124155	0.122635	0.121744	0.121328	0.120285	0.119574	0.12034	0.120557	0.121181	0.12208	0.122203	0.122575	0.122102	0.122285	0.121817	0.122022	0.122521	0.123131	0.123252	0.123317	0.123605	0.123991	0.124048	0.1263	0.124937	0.131348	0.130367	0.128648	0.129598	0.129966	0.129126	0.129228	0.129435	0.129604	0.129793	0.129966	0.130403	0.131084	0.131588	0.132973	0.134823	0.135718	0.134367	0.133421	0.133267	0.132432	0.131876
	0.120857	0.121638	0.118889	0.117357	0.116706	0.116517	0.115266	0.114589	0.114931	0.115534	0.116133	0.11691	0.117065	0.117376	0.117256	0.117564	0.11698	0.117175	0.117663	0.118328	0.118462	0.118095	0.118804	0.119095	0.119095	0.122272	0.124463	0.132708	0.1326	0.131056	0.132457	0.133511	0.133836	0.135804	0.138435	0.142827	0.146989	0.152703	0.159889	0.17095	0.180116	0.189428	0.195571	0.19784	0.196143	0.195087	0.1943	0.192496	0.190986
	0.130575	0.132105	0.129156	0.127593	0.126441	0.126215	0.125301	0.124241	0.124566	0.124794	0.125306	0.126304	0.126295	0.126508	0.125763	0.12602	0.125252	0.125041	0.125614	0.12587	0.125848	0.125927	0.126205	0.126343	0.126244	0.127705	0.127066	0.135015	0.136443	0.137735	0.141236	0.14294	0.142216	0.142	0.141794	0.141838	0.141543	0.14145	0.14175	0.142176	0.142349	0.143491	0.145485	0.145814	0.144133	0.143123	0.142463	0.14179	0.140802
	0.133347	0.134243	0.131494	0.1299	0.128851	0.128607	0.127258	0.126733	0.12727	0.127743	0.128407	0.129495	0.129313	0.129624	0.12948	0.129607	0.129052	0.129254	0.129669	0.130171	0.130029	0.130215	0.130769	0.13106	0.131102	0.132537	0.131128	0.1379	0.136896	0.135336	0.136319	0.136387	0.135873	0.135531	0.135558	0.13582	0.135345	0.135637	0.136054	0.136492	0.136848	0.13815	0.140031	0.141192	0.139543	0.138509	0.138276	0.137776	0.13706
	0.12995	0.130519	0.127797	0.126012	0.124975	0.124595	0.123112	0.12245	0.123114	0.123348	0.124156	0.124943	0.124966	0.125292	0.125014	0.125106	0.124648	0.125007	0.125556	0.126054	0.125912	0.125855	0.126047	0.126307	0.126083	0.127978	0.126634	0.133505	0.133131	0.131959	0.13341	0.134177	0.133529	0.13366	0.133651	0.133861	0.134221	0.13407	0.134378	0.135002	0.135002	0.136616	0.137864	0.138701	0.137367	0.136373	0.136319	0.135422	0.134629
	0.121946	0.122454	0.11979	0.118027	0.116936	0.116413	0.115252	0.114351	0.115006	0.114968	0.115517	0.116121	0.116185	0.116306	0.115866	0.115971	0.115137	0.115224	0.115924	0.116443	0.116236	0.11621	0.11638	0.116634	0.116703	0.117462	0.116149	0.122125	0.121284	0.120012	0.120888	0.121257	0.12036	0.120397	0.120517	0.120476	0.120565	0.120529	0.120899	0.121098	0.121418	0.122601	0.124151	0.12461	0.123729	0.122708	0.122656	0.122068	0.121449
	0.133943	0.135092	0.131983	0.130451	0.129135	0.128375	0.12744	0.126148	0.126777	0.126899	0.12751	0.128265	0.128184	0.128445	0.127631	0.127766	0.126835	0.126812	0.12697	0.127256	0.127431	0.127261	0.127347	0.127829	0.127647	0.128178	0.126727	0.133259	0.132211	0.130047	0.131126	0.131887	0.130851	0.130941	0.131326	0.131446	0.1316	0.132032	0.132455	0.132795	0.133153	0.13428	0.136055	0.136672	0.135206	0.134254	0.134141	0.133269	0.132352
	0.121232	0.121742	0.119271	0.117775	0.116746	0.116157	0.115288	0.114795	0.115322	0.11589	0.116226	0.117079	0.117406	0.117385	0.117457	0.117625	0.117186	0.117592	0.117988	0.118608	0.11863	0.119021	0.119299	0.119429	0.119211	0.121732	0.120369	0.126165	0.126026	0.12488	0.125961	0.1263	0.125858	0.125939	0.126225	0.126302	0.127322	0.12753	0.128044	0.128869	0.128961	0.130173	0.131599	0.132153	0.131029	0.129442	0.129511	0.128272	0.127772
	0.121738	0.122625	0.11995	0.118836	0.118058	0.117367	0.11678	0.115976	0.116705	0.1171	0.117864	0.118216	0.118903	0.118646	0.118455	0.118661	0.117707	0.117776	0.118368	0.118988	0.119203	0.119086	0.119619	0.119981	0.120112	0.120588	0.119115	0.12535	0.124316	0.122625	0.123318	0.123909	0.12314	0.123554	0.123235	0.123702	0.12361	0.123644	0.123823	0.124525	0.124779	0.125962	0.127664	0.128589	0.127581	0.126654	0.12626	0.125239	0.124774
	0.122662	0.123549	0.121027	0.119511	0.118667	0.118257	0.1176	0.116797	0.117466	0.117748	0.118528	0.119077	0.119394	0.119473	0.119151	0.119409	0.118959	0.118984	0.119523	0.120261	0.120216	0.120084	0.120467	0.120851	0.12084	0.122328	0.120923	0.127016	0.12603	0.12432	0.125535	0.127241	0.12753	0.128	0.127765	0.127913	0.128107	0.128083	0.128621	0.129308	0.129071	0.130607	0.132521	0.132949	0.131597	0.130732	0.13022	0.129046	0.128048
	0.119286	0.119526	0.117162	0.115263	0.114333	0.114045	0.113061	0.112575	0.113201	0.113809	0.114572	0.115432	0.115552	0.115854	0.115786	0.116	0.115761	0.116139	0.116826	0.117584	0.117787	0.117614	0.11805	0.118576	0.118254	0.120805	0.119606	0.12579	0.125046	0.124026	0.125773	0.128507	0.128574	0.129031	0.129275	0.129538	0.130331	0.130372	0.131363	0.131887	0.132015	0.133142	0.134525	0.134862	0.133565	0.131889	0.131642	0.130874	0.130035
	0.125193	0.126408	0.123634	0.122191	0.121365	0.12087	0.120084	0.119073	0.11941	0.119749	0.120369	0.121026	0.12123	0.121619	0.120763	0.120975	0.120268	0.120099	0.120505	0.12109	0.121085	0.120957	0.120989	0.121584	0.121584	0.1223	0.121326	0.127071	0.126756	0.125497	0.126605	0.128465	0.12894	0.130613	0.133082	0.135674	0.140036	0.145732	0.150421	0.15269	0.152299	0.152342	0.153215	0.152383	0.148986	0.146638	0.14502	0.142714	0.141263
	0.12091	0.121975	0.118964	0.117833	0.116976	0.116519	0.116046	0.114635	0.115541	0.115956	0.116528	0.117425	0.117239	0.117559	0.117099	0.117213	0.116623	0.116832	0.117358	0.11753	0.117677	0.117601	0.118004	0.118628	0.118339	0.119966	0.118734	0.124944	0.124412	0.122523	0.123564	0.12419	0.123548	0.123757	0.124283	0.124969	0.125527	0.126439	0.127204	0.127819	0.127818	0.129212	0.130567	0.130802	0.129073	0.128097	0.12805	0.126812	0.126321
	0.124706	0.125766	0.122967	0.121669	0.120627	0.120438	0.119366	0.118725	0.119069	0.11952	0.120027	0.120583	0.120888	0.120968	0.12029	0.120748	0.120306	0.120053	0.120422	0.120843	0.120857	0.120847	0.121216	0.1215	0.121244	0.122617	0.122874	0.131378	0.137589	0.151163	0.164569	0.172761	0.176918	0.181754	0.184808	0.189034	0.194978	0.203348	0.211206	0.21421	0.212282	0.209842	0.209935	0.205446	0.200125	0.194242	0.190848	0.186392	0.183309
	0.119255	0.120064	0.117084	0.115975	0.115198	0.114637	0.113321	0.112773	0.113438	0.113591	0.114471	0.115053	0.115141	0.115024	0.114962	0.115167	0.114872	0.114819	0.115341	0.116019	0.115875	0.115674	0.116145	0.116128	0.116285	0.117458	0.116593	0.122351	0.121701	0.120031	0.121162	0.121597	0.120866	0.121168	0.121371	0.121705	0.121792	0.122117	0.122254	0.123246	0.123224	0.124626	0.126132	0.126814	0.12507	0.124198	0.124373	0.123464	0.122852
	0.120019	0.120115	0.117473	0.115869	0.114902	0.114483	0.113649	0.113153	0.114041	0.114566	0.114949	0.1161	0.116079	0.116377	0.116477	0.116839	0.116799	0.116877	0.117619	0.118092	0.11836	0.118244	0.118575	0.11897	0.119105	0.122303	0.121565	0.130078	0.13389	0.140324	0.167857	0.220663	0.250384	0.255507	0.251371	0.245074	0.239033	0.234217	0.229035	0.2226	0.217939	0.213089	0.212586	0.211324	0.206446	0.200636	0.198124	0.194479	0.190546
	0.145768	0.138479	0.138185	0.13686	0.134382	0.133952	0.134335	0.133602	0.131538	0.130151	0.129969	0.129207	0.129024	0.128473	0.128174	0.127412	0.126698	0.126444	0.126659	0.126365	0.126798	0.127245	0.127654	0.127391	0.127631	0.127475	0.124848	0.124779	0.124844	0.125761	0.125863	0.125763	0.125975	0.126287	0.125635	0.125648	0.125747	0.125438	0.125503	0.125557	0.125781	0.12611	0.125982	0.125744	0.126103	0.126964	0.127083	0.126367	0.126038
	0.146368	0.138743	0.138343	0.137681	0.135237	0.134763	0.135409	0.13504	0.132977	0.131196	0.13088	0.130132	0.130148	0.1295	0.129372	0.128241	0.127672	0.127119	0.127378	0.127004	0.127201	0.127399	0.127801	0.127556	0.127647	0.126944	0.124503	0.123918	0.124192	0.124722	0.125044	0.124678	0.124975	0.125152	0.124854	0.124767	0.1246	0.124525	0.124393	0.124422	0.124594	0.124931	0.125058	0.124826	0.12499	0.12578	0.125779	0.125023	0.124899
	0.156217	0.147586	0.147095	0.145964	0.143117	0.142957	0.143354	0.142392	0.140158	0.138267	0.138024	0.137168	0.136971	0.135972	0.135902	0.134749	0.133936	0.133167	0.133653	0.133054	0.133525	0.133473	0.134033	0.133654	0.133952	0.131965	0.129344	0.128769	0.129055	0.129602	0.129982	0.12987	0.129799	0.129857	0.129594	0.129327	0.129079	0.129068	0.129249	0.128949	0.129125	0.12934	0.129649	0.129155	0.129225	0.130095	0.130188	0.129258	0.129274
	0.154894	0.14695	0.146591	0.145238	0.142728	0.141846	0.142527	0.141389	0.139286	0.13767	0.137406	0.13641	0.136347	0.135278	0.135268	0.134116	0.133606	0.13263	0.132768	0.132183	0.132687	0.132877	0.133263	0.133113	0.133126	0.131146	0.129062	0.128574	0.128442	0.129439	0.129686	0.129251	0.12978	0.129644	0.129414	0.129272	0.128835	0.128893	0.128916	0.128807	0.129051	0.129436	0.1291	0.128906	0.128871	0.129932	0.129916	0.129249	0.128896
	0.14644	0.13933	0.13911	0.138303	0.135193	0.134721	0.13503	0.134409	0.132265	0.130702	0.130284	0.129922	0.129713	0.128841	0.128797	0.127772	0.127515	0.127315	0.127194	0.127193	0.127782	0.128155	0.128525	0.128306	0.128329	0.127425	0.125671	0.12534	0.125295	0.126348	0.126825	0.126501	0.12662	0.12721	0.126772	0.126649	0.126932	0.127162	0.127445	0.127415	0.127284	0.12806	0.127847	0.12767	0.127915	0.128717	0.128826	0.127916	0.127843
	0.15745	0.14892	0.148378	0.147599	0.144543	0.144205	0.14437	0.143593	0.141489	0.139805	0.13911	0.137979	0.138421	0.137403	0.137212	0.136304	0.135722	0.134983	0.135494	0.134862	0.135496	0.135646	0.13649	0.135616	0.13596	0.136145	0.13309	0.132756	0.132892	0.133961	0.13393	0.133748	0.133785	0.134284	0.133767	0.133825	0.133523	0.133367	0.133132	0.133368	0.133466	0.133565	0.133639	0.133155	0.133416	0.13455	0.134618	0.134029	0.133542
	0.149093	0.141487	0.14114	0.140401	0.137504	0.13724	0.137687	0.136744	0.134162	0.133117	0.132728	0.132243	0.132113	0.131225	0.130935	0.130142	0.129849	0.129594	0.129932	0.129578	0.130261	0.130511	0.131025	0.130503	0.131272	0.130795	0.128426	0.127701	0.12812	0.129036	0.129413	0.129583	0.129331	0.129752	0.129842	0.129745	0.129371	0.12973	0.129713	0.130159	0.130369	0.13034	0.130939	0.130009	0.130613	0.131379	0.131629	0.130519	0.130704
	0.147454	0.139691	0.139175	0.138596	0.135821	0.135376	0.136006	0.135435	0.133104	0.131606	0.131206	0.130568	0.130392	0.129902	0.129598	0.128839	0.128186	0.127714	0.127808	0.127517	0.128291	0.128276	0.128874	0.128504	0.128626	0.128487	0.125885	0.125523	0.125828	0.12667	0.126931	0.126687	0.12697	0.127357	0.126735	0.127005	0.12665	0.12653	0.126477	0.126535	0.126647	0.127123	0.12718	0.1268	0.127095	0.127834	0.128203	0.12719	0.126986
	0.182718	0.175422	0.174866	0.173815	0.170378	0.169586	0.169787	0.168459	0.166532	0.164903	0.164499	0.16408	0.163053	0.163214	0.163318	0.161788	0.161514	0.16149	0.161349	0.161011	0.162694	0.163051	0.163627	0.163138	0.163485	0.165694	0.163518	0.162402	0.162795	0.163905	0.163684	0.163702	0.164039	0.164376	0.163656	0.163857	0.163786	0.163633	0.162995	0.16284	0.163589	0.164032	0.16438	0.164138	0.164263	0.165021	0.165621	0.165383	0.164173
	0.139896	0.132139	0.132008	0.131268	0.128609	0.128479	0.129254	0.1282	0.126922	0.12486	0.124521	0.124027	0.123896	0.123282	0.123143	0.121898	0.121927	0.12154	0.121266	0.121094	0.121618	0.121933	0.122442	0.122276	0.122415	0.122011	0.120015	0.119205	0.119547	0.12054	0.120516	0.120295	0.120569	0.12052	0.11993	0.12043	0.120382	0.120408	0.120084	0.120139	0.120516	0.120696	0.121028	0.120987	0.121004	0.121796	0.121829	0.120944	0.120991
	0.148006	0.140071	0.139558	0.138889	0.136299	0.136167	0.136606	0.135608	0.13383	0.132209	0.132259	0.131294	0.131063	0.130551	0.130165	0.129283	0.129198	0.12846	0.12912	0.128322	0.129157	0.129502	0.129757	0.129694	0.129879	0.130112	0.127612	0.126906	0.127046	0.128007	0.128381	0.128111	0.128431	0.128536	0.128432	0.1285	0.128666	0.128166	0.128227	0.128592	0.128907	0.129439	0.129524	0.129347	0.129546	0.130523	0.130357	0.129785	0.129823
	0.155868	0.147875	0.147677	0.146864	0.145026	0.144987	0.14632	0.145647	0.143466	0.142269	0.141581	0.14126	0.141183	0.14096	0.140709	0.139645	0.139282	0.138533	0.138909	0.138674	0.138936	0.139144	0.139882	0.139724	0.139964	0.138195	0.135423	0.135329	0.135324	0.135664	0.135943	0.136122	0.136332	0.136602	0.136387	0.136553	0.136532	0.136463	0.136569	0.136904	0.136957	0.137924	0.138254	0.137753	0.138274	0.139288	0.139122	0.138561	0.138616
	0.144663	0.136981	0.136763	0.136224	0.133848	0.133847	0.134798	0.134101	0.132155	0.130637	0.130515	0.129941	0.129783	0.129216	0.12907	0.128075	0.127807	0.127179	0.127264	0.127218	0.127602	0.12786	0.128457	0.128148	0.128313	0.12795	0.125681	0.12522	0.125454	0.126317	0.126407	0.126388	0.126644	0.1269	0.126491	0.126469	0.126625	0.126411	0.126654	0.126797	0.127056	0.127628	0.127687	0.127482	0.12759	0.128735	0.128499	0.127963	0.127808
	0.142902	0.134862	0.134809	0.134095	0.131602	0.131304	0.131859	0.131121	0.129503	0.127932	0.127929	0.127182	0.127508	0.127064	0.126567	0.125524	0.125482	0.125309	0.125167	0.124976	0.125386	0.125429	0.125861	0.125737	0.126148	0.126251	0.12358	0.123064	0.123343	0.124059	0.124429	0.124227	0.124503	0.124819	0.124056	0.124263	0.124174	0.124285	0.124176	0.124229	0.124257	0.12502	0.124854	0.124722	0.124665	0.125961	0.125829	0.125035	0.125408
	0.146546	0.139005	0.138513	0.137672	0.135129	0.13527	0.135361	0.134671	0.132782	0.131276	0.130929	0.130185	0.129922	0.129415	0.129326	0.128235	0.127704	0.12714	0.127528	0.12723	0.127914	0.128327	0.128213	0.128305	0.128338	0.127524	0.1251	0.124583	0.124945	0.125635	0.126075	0.125667	0.12627	0.126337	0.125824	0.125957	0.126092	0.125788	0.125557	0.125984	0.126172	0.12659	0.126795	0.126302	0.126685	0.12738	0.127547	0.127016	0.126762
	0.152531	0.144323	0.144208	0.143372	0.140633	0.140259	0.140938	0.140555	0.138656	0.136948	0.136716	0.136017	0.136113	0.135762	0.135251	0.134674	0.13404	0.133723	0.134011	0.133801	0.134376	0.134897	0.135822	0.135326	0.135829	0.135722	0.133267	0.132868	0.133191	0.134243	0.134627	0.134834	0.134707	0.13535	0.134769	0.134757	0.134839	0.134841	0.134884	0.135339	0.135501	0.136087	0.135941	0.135898	0.136017	0.137578	0.137485	0.136731	0.136595
	0.144784	0.137569	0.136907	0.135955	0.133378	0.133158	0.133831	0.133158	0.131214	0.129657	0.129391	0.128224	0.128312	0.127773	0.127337	0.12655	0.125945	0.125735	0.125764	0.125378	0.125426	0.125811	0.126674	0.126296	0.12658	0.126189	0.123393	0.123089	0.123593	0.124573	0.124592	0.124204	0.124314	0.124848	0.124606	0.12461	0.124315	0.124553	0.124523	0.124253	0.124604	0.125019	0.125164	0.12465	0.125108	0.12584	0.12563	0.125481	0.125179
	0.157221	0.148929	0.14882	0.147825	0.145214	0.144872	0.145768	0.144678	0.14237	0.140921	0.140293	0.139789	0.139926	0.139092	0.138452	0.137765	0.137296	0.136233	0.136744	0.13634	0.137039	0.137424	0.13783	0.137529	0.137893	0.136495	0.133842	0.133647	0.134002	0.134717	0.135221	0.134849	0.135292	0.135277	0.134922	0.135025	0.134716	0.134585	0.134489	0.134887	0.135068	0.135468	0.13546	0.135111	0.135326	0.136239	0.13626	0.135143	0.134999
	0.16384	0.156495	0.156158	0.154646	0.151696	0.150722	0.151629	0.150661	0.14861	0.147106	0.146791	0.146197	0.146071	0.145319	0.144891	0.144028	0.143575	0.143327	0.143911	0.143649	0.14452	0.144769	0.145547	0.145139	0.145688	0.14631	0.143893	0.143087	0.14368	0.144677	0.144552	0.14427	0.14472	0.14505	0.144683	0.144628	0.144577	0.144281	0.144042	0.144336	0.14467	0.145206	0.145304	0.145041	0.145024	0.14622	0.146381	0.14532	0.145389
	0.149807	0.142048	0.141837	0.140483	0.138139	0.137836	0.138639	0.13794	0.135739	0.134539	0.134119	0.133707	0.133682	0.133104	0.133225	0.13232	0.131651	0.131383	0.131712	0.13142	0.131736	0.132254	0.132797	0.132587	0.133104	0.133689	0.131649	0.130892	0.131599	0.132728	0.133172	0.132962	0.133286	0.133893	0.133854	0.133512	0.133714	0.13381	0.133941	0.134082	0.134242	0.134825	0.134799	0.134784	0.134933	0.13612	0.136095	0.135112	0.135774
	0.148649	0.140984	0.140743	0.13984	0.137121	0.136931	0.137521	0.136908	0.134728	0.133072	0.133264	0.132586	0.132412	0.131709	0.131739	0.130832	0.130037	0.129721	0.130005	0.129871	0.130452	0.13059	0.131099	0.131105	0.131307	0.131311	0.128958	0.128351	0.12907	0.12987	0.130305	0.130294	0.130607	0.130901	0.130667	0.130957	0.130611	0.130991	0.130752	0.130886	0.131242	0.131733	0.131882	0.131383	0.131733	0.132912	0.133113	0.131814	0.132002
	0.155483	0.147758	0.147645	0.146925	0.143858	0.142892	0.143591	0.142976	0.14095	0.139179	0.139233	0.138072	0.138162	0.137428	0.137285	0.136435	0.135761	0.135455	0.135517	0.135457	0.13611	0.136682	0.137173	0.136619	0.137021	0.13724	0.134263	0.133973	0.134355	0.135284	0.135841	0.135714	0.136052	0.136639	0.135909	0.136012	0.136175	0.135552	0.135968	0.135927	0.136211	0.136808	0.136831	0.136449	0.13681	0.137678	0.137603	0.13681	0.137116
	0.155272	0.146953	0.14642	0.145804	0.142759	0.142115	0.142094	0.141554	0.139782	0.137777	0.137456	0.136433	0.136456	0.13552	0.135753	0.134433	0.134141	0.133306	0.133909	0.133615	0.134189	0.134351	0.134903	0.134588	0.134775	0.134872	0.132473	0.131962	0.132419	0.133376	0.13348	0.133661	0.133606	0.133887	0.13334	0.133491	0.133636	0.133445	0.132932	0.133513	0.133674	0.13388	0.13345	0.133671	0.133918	0.13473	0.134924	0.134022	0.134351
	0.143957	0.136475	0.136386	0.135903	0.13419	0.134316	0.135344	0.134802	0.133392	0.131683	0.131443	0.131011	0.131156	0.130926	0.130421	0.12969	0.129371	0.128857	0.128923	0.128711	0.128914	0.129316	0.129766	0.129381	0.129665	0.128773	0.126396	0.126029	0.12596	0.126604	0.12667	0.126967	0.126805	0.127306	0.126851	0.127174	0.12702	0.126869	0.12711	0.127416	0.127324	0.127793	0.127698	0.127569	0.127972	0.128715	0.12894	0.128163	0.128253
	0.13774	0.130791	0.130776	0.130119	0.127596	0.127908	0.128147	0.127681	0.125761	0.124841	0.124284	0.123796	0.123671	0.123048	0.123384	0.122362	0.121865	0.121948	0.122021	0.121564	0.122199	0.122804	0.122953	0.122972	0.122918	0.124167	0.121645	0.121121	0.121424	0.122421	0.122312	0.122281	0.122634	0.123646	0.123636	0.125066	0.126505	0.128846	0.131242	0.132105	0.132922	0.133347	0.133492	0.133135	0.133577	0.134407	0.134232	0.133767	0.133479
	0.146776	0.139257	0.138678	0.138176	0.135041	0.135305	0.13577	0.134887	0.133189	0.131674	0.131255	0.130659	0.130699	0.12997	0.129915	0.12894	0.128416	0.127923	0.128438	0.128342	0.128909	0.129222	0.129698	0.129513	0.129762	0.130143	0.127948	0.12778	0.127961	0.128866	0.129171	0.128631	0.129221	0.129845	0.129375	0.129773	0.130513	0.131507	0.132611	0.134545	0.136538	0.139771	0.141891	0.142485	0.143175	0.143975	0.143203	0.141289	0.140917
	0.183351	0.174701	0.174009	0.17291	0.169308	0.168521	0.168617	0.167819	0.16553	0.16352	0.16344	0.162228	0.161802	0.160893	0.160778	0.159778	0.159016	0.158665	0.158942	0.158719	0.159115	0.159845	0.160077	0.160311	0.160306	0.158592	0.15622	0.155401	0.155614	0.156867	0.156967	0.157023	0.157072	0.157686	0.157207	0.157028	0.157459	0.157261	0.157162	0.157296	0.157808	0.157938	0.158254	0.15755	0.158153	0.158719	0.159164	0.157914	0.158303
	0.142219	0.13478	0.134601	0.133605	0.131147	0.130374	0.131285	0.130548	0.12845	0.127009	0.126853	0.126333	0.126077	0.125389	0.124971	0.124249	0.123834	0.123154	0.12372	0.123128	0.123574	0.124039	0.12431	0.124215	0.124454	0.12429	0.12194	0.121546	0.122108	0.122343	0.12302	0.122595	0.12264	0.122805	0.122511	0.122752	0.122859	0.122526	0.122493	0.122692	0.122947	0.122914	0.123238	0.12272	0.122946	0.123883	0.123887	0.123017	0.123283
	0.153175	0.145258	0.144295	0.143588	0.141019	0.140287	0.140685	0.139661	0.137826	0.136385	0.135941	0.135278	0.134972	0.134228	0.133919	0.133008	0.132906	0.132327	0.13252	0.132283	0.133012	0.133354	0.133764	0.133531	0.134185	0.133406	0.131195	0.130776	0.130848	0.131975	0.132139	0.132301	0.132159	0.132392	0.132156	0.132427	0.132089	0.131889	0.131998	0.132469	0.132429	0.132861	0.133156	0.132429	0.132619	0.133974	0.133767	0.132792	0.132933
	0.148486	0.140425	0.140042	0.138631	0.136281	0.135872	0.136115	0.135341	0.133392	0.13184	0.131206	0.130534	0.130566	0.12979	0.129545	0.128405	0.128082	0.127488	0.127675	0.127653	0.128071	0.128357	0.128892	0.128545	0.128948	0.12888	0.126326	0.126251	0.126342	0.127482	0.127604	0.127439	0.127462	0.127875	0.127439	0.127764	0.127245	0.127324	0.127224	0.127138	0.127241	0.127653	0.127626	0.12715	0.127463	0.12829	0.12815	0.127307	0.127214
	0.156282	0.147767	0.147455	0.146376	0.143435	0.14276	0.143346	0.142092	0.14023	0.138633	0.138091	0.137178	0.137238	0.13648	0.136145	0.13491	0.134495	0.133985	0.134631	0.134	0.134803	0.134613	0.135062	0.134918	0.13519	0.13377	0.131392	0.131135	0.131099	0.132118	0.132515	0.132406	0.132916	0.132786	0.132752	0.132668	0.132127	0.132439	0.132391	0.132087	0.132662	0.132684	0.132924	0.1323	0.132788	0.133563	0.133367	0.132636	0.132701
	0.153391	0.14591	0.145634	0.144632	0.141561	0.141444	0.141723	0.141092	0.138917	0.137354	0.137182	0.136625	0.136181	0.135397	0.135241	0.134223	0.134021	0.133351	0.1337	0.133487	0.134266	0.134465	0.135084	0.134596	0.134959	0.13584	0.133269	0.132868	0.133439	0.134303	0.134792	0.134839	0.13538	0.135234	0.13529	0.135422	0.135189	0.135038	0.134925	0.135075	0.135161	0.135442	0.135526	0.135428	0.135632	0.136831	0.136769	0.135715	0.135741
	0.150621	0.142582	0.142647	0.141235	0.138943	0.138398	0.138798	0.138256	0.136121	0.134638	0.134183	0.133608	0.133554	0.132599	0.132623	0.131764	0.130978	0.130624	0.130747	0.130612	0.131043	0.131495	0.131996	0.131663	0.131947	0.131007	0.128466	0.12817	0.128672	0.129315	0.129725	0.129427	0.12977	0.130029	0.129715	0.129896	0.129659	0.129429	0.129508	0.129711	0.129982	0.130365	0.130508	0.129797	0.130212	0.131126	0.131016	0.13046	0.130308
	0.150504	0.143341	0.143054	0.142161	0.138883	0.138777	0.139335	0.138482	0.136596	0.135091	0.134512	0.133705	0.134103	0.132968	0.132848	0.131972	0.131654	0.13105	0.132144	0.131875	0.132347	0.132841	0.133365	0.132999	0.133193	0.134091	0.131413	0.131454	0.131866	0.132475	0.132592	0.132475	0.132902	0.133241	0.133015	0.133336	0.133153	0.133412	0.133171	0.133249	0.133602	0.134218	0.134249	0.134089	0.134179	0.134741	0.135294	0.134217	0.134391
	0.159383	0.151447	0.151221	0.150323	0.147216	0.146584	0.146793	0.145963	0.144412	0.1426	0.142434	0.141463	0.141165	0.140521	0.140424	0.139403	0.139255	0.138632	0.139302	0.139109	0.139999	0.140033	0.140546	0.140349	0.140884	0.141759	0.139201	0.13916	0.139473	0.140742	0.141042	0.141018	0.14157	0.141736	0.141439	0.141959	0.142127	0.141889	0.141696	0.142129	0.142906	0.142973	0.143569	0.142779	0.143308	0.143949	0.144162	0.143295	0.143799
	0.149739	0.141878	0.141848	0.140954	0.138295	0.138177	0.138449	0.137805	0.135925	0.134526	0.134239	0.133695	0.13373	0.133346	0.132914	0.13218	0.131776	0.131251	0.131547	0.131311	0.132209	0.13259	0.133174	0.132794	0.133306	0.133676	0.131301	0.130432	0.131121	0.132124	0.132325	0.13237	0.13255	0.132855	0.132293	0.133108	0.132663	0.132676	0.132747	0.133103	0.133311	0.133745	0.133553	0.133442	0.13383	0.134759	0.134447	0.133968	0.133928
	0.150671	0.142919	0.14248	0.14155	0.138642	0.13871	0.139205	0.138631	0.13619	0.134738	0.13446	0.133715	0.133697	0.132921	0.132674	0.131788	0.131365	0.13092	0.131294	0.131012	0.131131	0.13177	0.132293	0.132113	0.132241	0.131766	0.129631	0.12923	0.129754	0.130688	0.130956	0.130639	0.130891	0.131379	0.13069	0.130842	0.130871	0.130717	0.130678	0.130618	0.130879	0.131472	0.131526	0.131134	0.131347	0.132434	0.132293	0.131528	0.131389
	0.147945	0.140135	0.139709	0.139343	0.136646	0.136761	0.137154	0.136659	0.134558	0.13307	0.133235	0.132095	0.132346	0.13195	0.131699	0.130548	0.130495	0.129872	0.130091	0.13014	0.130732	0.130697	0.13136	0.131341	0.131538	0.132618	0.13009	0.129539	0.130028	0.131195	0.131757	0.131345	0.131544	0.131855	0.131534	0.131412	0.131629	0.131534	0.131831	0.131765	0.13211	0.132356	0.132116	0.132047	0.132564	0.133105	0.13312	0.132563	0.132662
	0.149885	0.1418	0.141458	0.140598	0.138095	0.137232	0.137297	0.13705	0.134951	0.133364	0.132958	0.132227	0.132314	0.131596	0.131416	0.130647	0.130024	0.129731	0.130176	0.130033	0.130491	0.130701	0.131667	0.131091	0.130945	0.132548	0.130054	0.129447	0.130014	0.130354	0.131682	0.131049	0.131059	0.131483	0.130813	0.131414	0.1311	0.131176	0.130956	0.131031	0.131322	0.131344	0.131834	0.131141	0.131377	0.132519	0.132545	0.131012	0.131543
	0.156758	0.148603	0.147911	0.1468	0.144354	0.143543	0.144019	0.143103	0.141269	0.139901	0.139522	0.138892	0.138656	0.13767	0.137899	0.137091	0.136316	0.13585	0.136269	0.136401	0.137033	0.137788	0.137634	0.138166	0.137807	0.139505	0.137463	0.137095	0.138207	0.139814	0.141334	0.141716	0.144673	0.14665	0.147155	0.15055	0.153852	0.15463	0.155766	0.158546	0.16021	0.161914	0.163335	0.162814	0.163256	0.164146	0.165235	0.164296	0.163342
	0.157983	0.150459	0.150692	0.148835	0.145975	0.145478	0.145591	0.144999	0.142897	0.141566	0.14133	0.140581	0.140306	0.13954	0.139335	0.13859	0.138319	0.137813	0.138422	0.138284	0.139157	0.138976	0.139862	0.139505	0.139849	0.140608	0.137896	0.137836	0.13808	0.139395	0.139571	0.139464	0.139982	0.139742	0.139621	0.139424	0.13944	0.139438	0.139724	0.139268	0.139749	0.140538	0.140311	0.140061	0.140219	0.141501	0.141514	0.140709	0.140388
	0.154602	0.146232	0.146175	0.145231	0.142436	0.142434	0.143044	0.142486	0.139964	0.138709	0.138459	0.137471	0.137634	0.136869	0.13664	0.135582	0.135538	0.134561	0.135106	0.134945	0.135458	0.135619	0.136393	0.135849	0.136218	0.135326	0.132748	0.132349	0.132561	0.13309	0.133554	0.133566	0.133449	0.133685	0.133407	0.133806	0.133423	0.133497	0.133466	0.133502	0.133591	0.134172	0.134358	0.13379	0.134124	0.135083	0.135222	0.134582	0.134483
	0.135211	0.128282	0.127793	0.127394	0.125092	0.124673	0.12542	0.124712	0.122821	0.121304	0.121238	0.120579	0.120784	0.120146	0.120412	0.119288	0.118824	0.118892	0.118879	0.118717	0.118928	0.119615	0.120281	0.120078	0.120433	0.119956	0.117902	0.117447	0.117587	0.118449	0.118515	0.118655	0.118851	0.119111	0.118526	0.118689	0.118621	0.118678	0.118573	0.118662	0.118869	0.119298	0.119302	0.118936	0.119509	0.120069	0.120531	0.120068	0.120066
	0.133528	0.126918	0.126545	0.125871	0.123394	0.123235	0.12375	0.123123	0.12139	0.120262	0.119347	0.118872	0.11858	0.11838	0.118593	0.117624	0.117564	0.116782	0.116878	0.116907	0.117651	0.117797	0.118057	0.118035	0.11835	0.118713	0.116263	0.115618	0.116425	0.116998	0.117419	0.117011	0.117294	0.117004	0.116879	0.117121	0.117146	0.116597	0.116299	0.117112	0.116999	0.117221	0.117558	0.117199	0.117885	0.118271	0.118275	0.117844	0.117834
	0.143928	0.141876	0.138309	0.137806	0.135832	0.134386	0.134071	0.133546	0.133897	0.133783	0.133573	0.13332	0.133285	0.133736	0.133438	0.133327	0.133936	0.133867	0.134355	0.13431	0.134678	0.134798	0.134926	0.13471	0.135101	0.135473	0.13493	0.134947	0.135568	0.135956	0.136053	0.135827	0.136	0.136159	0.136059	0.136535	0.137151	0.137377	0.137263	0.137056	0.137168	0.137014	0.137196	0.137155	0.137015	0.136881	0.13691	0.136804	0.136841
	0.143544	0.14098	0.137403	0.136604	0.134865	0.133628	0.133174	0.1327	0.132752	0.13328	0.132865	0.132675	0.132347	0.132886	0.132661	0.132476	0.133088	0.133199	0.133425	0.133373	0.133494	0.1336	0.134137	0.133631	0.133756	0.134749	0.134319	0.135013	0.135504	0.13615	0.135959	0.13597	0.13599	0.136316	0.136133	0.136891	0.137134	0.137213	0.137072	0.137371	0.137174	0.136954	0.136964	0.137277	0.136851	0.136946	0.136673	0.136474	0.136256
	0.136425	0.13448	0.131049	0.130438	0.128693	0.127494	0.126942	0.126471	0.126802	0.127122	0.127002	0.126629	0.126438	0.126881	0.126416	0.126652	0.126903	0.127223	0.127224	0.127518	0.127546	0.127739	0.12824	0.127934	0.128099	0.128817	0.128596	0.128995	0.129585	0.130115	0.130185	0.130231	0.130331	0.13034	0.129982	0.130805	0.131106	0.132263	0.13216	0.132355	0.132193	0.132322	0.132332	0.132455	0.13174	0.131892	0.131634	0.131505	0.131524
	0.146389	0.144166	0.140641	0.140077	0.138153	0.136728	0.136013	0.135598	0.135646	0.13573	0.135732	0.135425	0.135236	0.135592	0.135178	0.135161	0.135706	0.135542	0.135819	0.135794	0.135879	0.13595	0.136453	0.136178	0.136169	0.136253	0.135621	0.136379	0.137271	0.139833	0.142975	0.149526	0.159727	0.177462	0.203473	0.221318	0.228249	0.230188	0.228806	0.225566	0.22029	0.214252	0.208851	0.204402	0.19997	0.196057	0.192015	0.187482	0.183731
	0.1403	0.138418	0.135166	0.134144	0.132594	0.131051	0.130377	0.129937	0.13016	0.130135	0.130113	0.12964	0.129436	0.129638	0.12937	0.129319	0.129375	0.12957	0.129721	0.129629	0.129419	0.129843	0.130152	0.129646	0.129791	0.129549	0.12895	0.129154	0.129647	0.130011	0.130151	0.130155	0.130764	0.131698	0.131767	0.132897	0.13301	0.133629	0.133438	0.133639	0.13337	0.133309	0.133506	0.133479	0.133085	0.133101	0.133182	0.13261	0.132814
	0.13775	0.13511	0.132205	0.131173	0.129128	0.127634	0.126981	0.126368	0.126358	0.126045	0.126042	0.125586	0.125161	0.125483	0.125055	0.125038	0.125406	0.125451	0.125497	0.1253	0.125149	0.125172	0.125381	0.124757	0.125107	0.124406	0.124135	0.124391	0.124818	0.125162	0.124989	0.125063	0.125275	0.125762	0.125625	0.126244	0.126658	0.126984	0.126954	0.127184	0.126873	0.127144	0.12712	0.127316	0.127319	0.127477	0.127451	0.127225	0.127282
	0.135399	0.133137	0.130152	0.129489	0.127715	0.126329	0.125847	0.125254	0.125401	0.125279	0.125377	0.124943	0.124806	0.125115	0.124923	0.124668	0.125198	0.125078	0.125102	0.125138	0.125256	0.125219	0.125685	0.125191	0.125329	0.125367	0.124764	0.124751	0.125	0.125336	0.125414	0.125193	0.125286	0.125638	0.12539	0.12573	0.126007	0.126488	0.126464	0.126584	0.126495	0.126315	0.126256	0.12657	0.126276	0.126311	0.125795	0.125586	0.125677
	0.138063	0.135772	0.132294	0.131537	0.129464	0.128058	0.12756	0.126834	0.127194	0.12698	0.126975	0.126107	0.125942	0.126309	0.126121	0.125906	0.126324	0.126064	0.126124	0.126029	0.125914	0.125776	0.126059	0.125557	0.125646	0.124599	0.124322	0.124181	0.124383	0.124824	0.124789	0.124619	0.124759	0.124936	0.124596	0.12494	0.12497	0.125407	0.125005	0.125465	0.125112	0.125156	0.125046	0.12511	0.124954	0.124945	0.124519	0.124386	0.124523
	0.151061	0.148533	0.144802	0.143541	0.141607	0.140247	0.139365	0.138577	0.138944	0.138938	0.138765	0.138469	0.138126	0.138404	0.138051	0.138372	0.138848	0.138722	0.139177	0.139047	0.138802	0.139069	0.13927	0.138928	0.139185	0.140313	0.139821	0.139923	0.140641	0.140981	0.141128	0.141155	0.141021	0.141309	0.140964	0.141263	0.141502	0.141949	0.141876	0.141736	0.142004	0.142089	0.142112	0.142463	0.142063	0.141924	0.141706	0.141789	0.142138
	0.144549	0.142065	0.138893	0.138175	0.136135	0.13493	0.134202	0.133788	0.13385	0.13414	0.133849	0.133611	0.133313	0.133591	0.133506	0.133467	0.133581	0.133757	0.133917	0.133718	0.133874	0.133738	0.13441	0.134049	0.134287	0.133936	0.133317	0.133239	0.133943	0.134153	0.134476	0.134296	0.134188	0.134843	0.13456	0.135035	0.135164	0.136072	0.135939	0.135894	0.136056	0.135964	0.136637	0.136662	0.136502	0.136342	0.136115	0.136225	0.136756
	0.147986	0.145365	0.141994	0.141284	0.139311	0.137633	0.136881	0.136253	0.136349	0.136433	0.13618	0.135711	0.135146	0.135741	0.135376	0.135068	0.13567	0.135415	0.135508	0.135601	0.135307	0.135374	0.135827	0.13549	0.135513	0.135435	0.135105	0.135046	0.135559	0.135806	0.13586	0.136134	0.136194	0.136751	0.136355	0.136804	0.13715	0.137558	0.137798	0.137579	0.137225	0.137141	0.137457	0.13748	0.137297	0.137512	0.137201	0.136882	0.137034
	0.145208	0.143201	0.139878	0.139708	0.137717	0.136325	0.13593	0.135537	0.135454	0.135449	0.135666	0.135425	0.135371	0.135797	0.135368	0.135522	0.136368	0.136131	0.136466	0.136781	0.136808	0.136956	0.137183	0.1372	0.137334	0.136403	0.135304	0.135252	0.135542	0.136981	0.137476	0.137179	0.137358	0.137396	0.137215	0.137681	0.137836	0.138385	0.138116	0.138423	0.138752	0.138961	0.139562	0.139618	0.139686	0.139698	0.139533	0.13946	0.139661
	0.145529	0.143366	0.140444	0.139481	0.137982	0.136742	0.136279	0.136042	0.136534	0.136703	0.136873	0.136777	0.13695	0.137635	0.137446	0.137185	0.137593	0.138128	0.138535	0.138386	0.138938	0.139444	0.139798	0.139919	0.140073	0.141584	0.141544	0.141708	0.142378	0.142622	0.142825	0.143174	0.143359	0.143297	0.143449	0.143928	0.144374	0.144873	0.144792	0.144826	0.144678	0.145165	0.145271	0.145401	0.145102	0.145113	0.144856	0.144814	0.144951
	0.141245	0.138975	0.135288	0.134927	0.132725	0.131127	0.130496	0.129785	0.129714	0.129843	0.129445	0.129328	0.129231	0.129201	0.128748	0.128303	0.12896	0.128755	0.129342	0.12876	0.128955	0.128803	0.12919	0.128561	0.128787	0.128761	0.128238	0.128633	0.130211	0.131696	0.133532	0.135212	0.137622	0.139589	0.140469	0.143041	0.144995	0.146739	0.14924	0.149698	0.149522	0.149606	0.149742	0.149811	0.149563	0.149319	0.148171	0.147897	0.148126
	0.137251	0.135361	0.131707	0.131129	0.129229	0.127983	0.127037	0.126636	0.126629	0.126591	0.126479	0.125924	0.12595	0.125788	0.125397	0.125272	0.125808	0.125626	0.125818	0.125164	0.124993	0.124961	0.125287	0.124783	0.124896	0.124289	0.123878	0.123609	0.124473	0.124814	0.125187	0.124994	0.124894	0.124967	0.124732	0.12515	0.125248	0.125287	0.125485	0.125189	0.124987	0.12489	0.124877	0.124635	0.124491	0.124389	0.124094	0.123724	0.123538
	0.137198	0.135053	0.131124	0.130338	0.128336	0.12687	0.126435	0.125756	0.125578	0.1255	0.125216	0.124823	0.124182	0.124553	0.12426	0.123869	0.124086	0.124	0.12422	0.124113	0.123935	0.124407	0.124412	0.124208	0.123889	0.123593	0.122687	0.123148	0.123912	0.124853	0.125201	0.125468	0.124918	0.125392	0.125621	0.126247	0.126114	0.126726	0.127268	0.126955	0.126758	0.126871	0.127133	0.127596	0.127142	0.126823	0.126867	0.126577	0.126552
	0.134275	0.131774	0.12843	0.127589	0.125902	0.124153	0.123569	0.122901	0.122871	0.123192	0.122623	0.122338	0.122375	0.122394	0.121974	0.122053	0.122219	0.121979	0.122442	0.122158	0.122392	0.122363	0.122873	0.122423	0.122018	0.122564	0.12274	0.123839	0.124574	0.125092	0.125626	0.125275	0.125859	0.126319	0.126311	0.12716	0.127603	0.128064	0.127549	0.128136	0.127742	0.128087	0.127752	0.127995	0.128014	0.128074	0.12781	0.127621	0.127814
	0.13504	0.13309	0.129776	0.129151	0.127402	0.126003	0.125688	0.125135	0.125107	0.125277	0.125136	0.124745	0.124753	0.124976	0.124557	0.124584	0.125096	0.125082	0.125171	0.125561	0.125305	0.125439	0.125764	0.125407	0.125749	0.124132	0.123238	0.123856	0.124292	0.124949	0.125198	0.125047	0.125363	0.125441	0.126155	0.127091	0.127403	0.127938	0.128644	0.128826	0.128832	0.129373	0.129922	0.130191	0.130378	0.130319	0.130763	0.130473	0.130575
	0.148291	0.146217	0.142312	0.141696	0.139412	0.137904	0.137315	0.136683	0.13672	0.13674	0.13643	0.136152	0.135794	0.136244	0.136018	0.135715	0.136255	0.135947	0.1363	0.136128	0.136102	0.136179	0.136452	0.135777	0.136179	0.13551	0.135085	0.135052	0.13568	0.136309	0.13685	0.137097	0.137762	0.138729	0.140189	0.142141	0.143204	0.143851	0.143708	0.143274	0.143214	0.142882	0.142837	0.142436	0.142016	0.141443	0.14088	0.140345	0.140292
	0.145219	0.143081	0.139038	0.138102	0.1364	0.135	0.134718	0.134236	0.134252	0.134331	0.133823	0.133547	0.132807	0.132866	0.132596	0.131922	0.132626	0.132489	0.132718	0.132593	0.132546	0.132489	0.132839	0.132146	0.132404	0.133856	0.133899	0.135284	0.138168	0.141216	0.142946	0.148389	0.151869	0.153291	0.15986	0.167662	0.177549	0.189769	0.193042	0.196067	0.19742	0.195421	0.1913	0.185426	0.179528	0.17489	0.169514	0.165407	0.161634
Time (s)	0	2	4	6	8	10	12	14	16	18	20	22	24	26	28	30	32	34	36	38	40	42	44	46	48	50	52	54	56	58	60	62	64	66	68	70	72	74	76	78	80	82	84	86	88	90	92	94	96
[truncated: 261 more columns]

## Sheet: Figure S1B
IP3R1 shRNA Hnpc	0.132991	0.127802	0.127378	0.127551	0.128048	0.127811	0.128037	0.128059	0.127813	0.128001	0.128188	0.128442	0.128407	0.128557	0.128559	0.128618	0.128383	0.128946	0.128763	0.129	0.129404	0.129895	0.129297	0.129143	0.12914	0.128127	0.127873	0.127978	0.128522	0.128925	0.128934	0.12862	0.128684	0.128417	0.128553	0.128697	0.12911	0.128919	0.129025	0.129034	0.128723	0.128633	0.128705	0.128322	0.128382	0.128576	0.128258	0.12867	0.129037
	0.135476	0.130208	0.130055	0.130147	0.130444	0.13028	0.130295	0.130498	0.130058	0.129894	0.130138	0.130566	0.130446	0.130508	0.130308	0.13047	0.130129	0.130789	0.130521	0.130915	0.130906	0.131207	0.130631	0.13072	0.130059	0.12854	0.128213	0.128644	0.128799	0.12956	0.129879	0.129244	0.128983	0.129264	0.129562	0.129537	0.129894	0.13025	0.129973	0.129863	0.129824	0.12976	0.129609	0.129706	0.129905	0.130123	0.129229	0.13015	0.130052
	0.136808	0.131735	0.13131	0.131503	0.131588	0.131452	0.131522	0.131369	0.130893	0.130827	0.13117	0.131491	0.131173	0.130991	0.131567	0.131078	0.130966	0.131878	0.13141	0.13142	0.131979	0.131994	0.131805	0.13148	0.131256	0.130646	0.130722	0.130953	0.130837	0.131573	0.131604	0.131391	0.131009	0.131315	0.131085	0.131503	0.132256	0.132497	0.132132	0.13238	0.132448	0.132213	0.131721	0.131889	0.13228	0.132118	0.131892	0.132203	0.132554
	0.13993	0.134614	0.133759	0.134414	0.134728	0.134832	0.134744	0.134503	0.134009	0.134239	0.134151	0.134721	0.134651	0.134499	0.134361	0.134636	0.134339	0.134947	0.134752	0.134952	0.135131	0.134955	0.134684	0.134458	0.134799	0.132602	0.132983	0.132999	0.133303	0.133476	0.134237	0.13355	0.133713	0.133235	0.133751	0.133709	0.134218	0.134042	0.134026	0.134324	0.13384	0.13461	0.133794	0.133499	0.133925	0.133764	0.133455	0.13395	0.134219
	0.136206	0.130725	0.130644	0.130555	0.130751	0.130743	0.130774	0.130959	0.130421	0.130703	0.131075	0.131047	0.130779	0.130933	0.131117	0.131102	0.130595	0.131343	0.131001	0.131221	0.131177	0.131694	0.131521	0.130988	0.130792	0.129965	0.129806	0.130173	0.130203	0.130751	0.131103	0.130538	0.130551	0.130887	0.130924	0.131057	0.131227	0.131771	0.131257	0.131607	0.131389	0.131344	0.131103	0.131146	0.131031	0.131104	0.130812	0.131137	0.131657
	0.137986	0.132568	0.132193	0.132358	0.132529	0.132498	0.13246	0.1327	0.131921	0.132099	0.132303	0.132761	0.132347	0.132533	0.132768	0.132591	0.132688	0.132592	0.132459	0.133168	0.13315	0.133395	0.132987	0.1328	0.132279	0.132119	0.131731	0.131602	0.132364	0.132964	0.132784	0.132375	0.132869	0.132538	0.132772	0.132647	0.133487	0.133293	0.133439	0.133238	0.13327	0.133133	0.13298	0.132279	0.132993	0.133093	0.132748	0.132789	0.133416
	0.136923	0.131714	0.131263	0.131176	0.131072	0.131188	0.131078	0.131386	0.130921	0.130962	0.130884	0.131464	0.131625	0.13137	0.131344	0.1314	0.131437	0.132085	0.13182	0.13242	0.132376	0.132773	0.132748	0.132306	0.132567	0.133034	0.13284	0.13281	0.13362	0.134081	0.134248	0.134126	0.133703	0.13359	0.133694	0.133489	0.134045	0.133881	0.133872	0.13394	0.133735	0.134046	0.133506	0.133683	0.133742	0.133834	0.133718	0.133772	0.134339
	0.142589	0.136898	0.136548	0.136297	0.136837	0.136647	0.136797	0.13691	0.135925	0.13616	0.136647	0.136613	0.136971	0.136887	0.136824	0.136717	0.136589	0.137598	0.136952	0.137571	0.138159	0.13853	0.13796	0.137986	0.137786	0.138104	0.13772	0.138235	0.138812	0.139357	0.139157	0.138625	0.138542	0.138752	0.139254	0.139169	0.139324	0.139652	0.13963	0.139739	0.139804	0.139667	0.139239	0.139478	0.139386	0.139759	0.139476	0.139893	0.140128
	0.131025	0.12597	0.125349	0.125396	0.125263	0.125562	0.125384	0.125133	0.124617	0.124991	0.124878	0.125367	0.125288	0.125262	0.125422	0.12529	0.125199	0.125641	0.125336	0.126038	0.12629	0.126366	0.126408	0.125937	0.126106	0.127174	0.12685	0.127017	0.127736	0.128201	0.128426	0.128107	0.127783	0.12784	0.128099	0.127963	0.128874	0.128885	0.128712	0.128554	0.128663	0.128663	0.12818	0.128299	0.128749	0.128734	0.128207	0.128725	0.129002
	0.159962	0.155143	0.154209	0.153712	0.154181	0.154228	0.153473	0.153584	0.152703	0.153044	0.153062	0.153604	0.153698	0.153645	0.153675	0.153149	0.153	0.154008	0.153689	0.154361	0.154761	0.155163	0.154727	0.15482	0.15435	0.154047	0.154133	0.154679	0.154902	0.155832	0.155929	0.156121	0.155598	0.155513	0.155887	0.15563	0.157028	0.157157	0.156981	0.157661	0.157279	0.157323	0.156905	0.157266	0.157322	0.158351	0.157286	0.157869	0.158302
	0.129409	0.124538	0.124127	0.124188	0.124135	0.124377	0.124294	0.124301	0.123686	0.12364	0.123861	0.124109	0.123714	0.123895	0.123913	0.12386	0.123693	0.124227	0.123936	0.124069	0.124476	0.124861	0.12442	0.124054	0.123907	0.123628	0.123476	0.12397	0.124438	0.125168	0.125116	0.124905	0.124637	0.124757	0.124829	0.125037	0.125888	0.125359	0.125608	0.125513	0.12532	0.125367	0.124882	0.124961	0.125111	0.125238	0.124733	0.125396	0.125676
	0.126031	0.12121	0.12111	0.12119	0.121432	0.12136	0.121195	0.121549	0.121058	0.121233	0.12143	0.121958	0.121313	0.121844	0.121999	0.121633	0.121398	0.122339	0.121969	0.12239	0.122865	0.122898	0.122395	0.122288	0.122246	0.122464	0.122142	0.122569	0.122879	0.123484	0.123609	0.123117	0.122945	0.123184	0.123228	0.123474	0.12386	0.124162	0.123907	0.123995	0.12366	0.123899	0.123396	0.123291	0.12338	0.123677	0.123052	0.123504	0.1241
	0.127535	0.122576	0.122328	0.121977	0.122549	0.12254	0.122402	0.122594	0.122097	0.122435	0.122321	0.122731	0.122853	0.12279	0.122974	0.122674	0.122627	0.123324	0.12312	0.123122	0.12357	0.123897	0.12339	0.123063	0.12331	0.1229	0.122396	0.122598	0.122936	0.12392	0.123582	0.12355	0.12352	0.123653	0.124117	0.123726	0.124419	0.124558	0.124713	0.124768	0.124702	0.124512	0.124376	0.124323	0.124514	0.124599	0.12432	0.124881	0.125293
	0.126849	0.121718	0.121328	0.121793	0.121975	0.121873	0.121745	0.12199	0.121372	0.121628	0.12169	0.121948	0.122053	0.122243	0.121889	0.122172	0.12221	0.122551	0.122356	0.122316	0.123179	0.122994	0.122654	0.12248	0.122286	0.121668	0.122134	0.122169	0.122372	0.122777	0.122764	0.122262	0.122767	0.122545	0.122898	0.122944	0.124138	0.12382	0.123728	0.123669	0.123704	0.123518	0.12316	0.123727	0.123883	0.123568	0.123089	0.12403	0.124002
	0.142378	0.140575	0.138423	0.137612	0.136987	0.136049	0.135725	0.135835	0.136013	0.13595	0.135803	0.13602	0.135381	0.135953	0.135929	0.135577	0.135898	0.136108	0.135963	0.135838	0.135977	0.135986	0.136463	0.136274	0.136717	0.136365	0.136372	0.136526	0.136409	0.136817	0.136968	0.137183	0.137343	0.137483	0.137766	0.138258	0.138094	0.138042	0.137862	0.138249	0.138063	0.138161	0.137682	0.137795	0.13756	0.137512	0.137564	0.137609	0.13774
	0.138728	0.137147	0.134692	0.133741	0.133286	0.132424	0.131851	0.13186	0.132062	0.131954	0.131877	0.132145	0.131782	0.132121	0.132047	0.131774	0.131969	0.132156	0.132343	0.131894	0.13224	0.132171	0.132611	0.13251	0.132835	0.132081	0.1325	0.132332	0.132549	0.133029	0.1331	0.133152	0.133298	0.133339	0.133389	0.134042	0.133899	0.133933	0.133812	0.133903	0.13418	0.133843	0.133525	0.133311	0.13342	0.133503	0.133487	0.133495	0.133603
	0.133061	0.131584	0.129388	0.128462	0.128081	0.127003	0.126761	0.126787	0.127055	0.126917	0.126968	0.127256	0.126954	0.127266	0.127252	0.126907	0.127185	0.127289	0.127388	0.127408	0.127617	0.127346	0.127657	0.127804	0.128066	0.128479	0.128402	0.128411	0.128725	0.128836	0.128994	0.129319	0.129185	0.129348	0.129445	0.130017	0.129824	0.129936	0.129595	0.129701	0.129851	0.129561	0.129272	0.129269	0.129319	0.129378	0.12929	0.129283	0.129428
	0.125721	0.124359	0.122434	0.121719	0.121165	0.120135	0.119892	0.11996	0.120165	0.119986	0.120028	0.120268	0.119922	0.120308	0.120344	0.12029	0.120345	0.120471	0.120731	0.120464	0.120745	0.12076	0.121042	0.120974	0.121206	0.121026	0.121223	0.121429	0.121376	0.121551	0.121751	0.121971	0.121948	0.122188	0.122112	0.122413	0.122445	0.122396	0.122319	0.12244	0.122525	0.122274	0.122158	0.122141	0.122084	0.121977	0.122121	0.122088	0.122163
	0.137081	0.135592	0.133178	0.132113	0.131746	0.130661	0.130327	0.130341	0.130414	0.130094	0.13029	0.130474	0.129973	0.130338	0.130254	0.129968	0.130213	0.130448	0.130428	0.130292	0.130534	0.130463	0.130712	0.130571	0.130753	0.130357	0.130576	0.130657	0.130646	0.131046	0.131036	0.131366	0.131446	0.131609	0.131646	0.131991	0.13183	0.131948	0.132031	0.132076	0.132224	0.132045	0.131847	0.131762	0.13154	0.131638	0.131578	0.131716	0.131745
	0.140567	0.138921	0.136691	0.136111	0.135449	0.134646	0.134565	0.13443	0.134666	0.134632	0.134691	0.134863	0.134518	0.134958	0.134917	0.134837	0.135021	0.135213	0.135461	0.135133	0.135671	0.135666	0.135952	0.135857	0.136407	0.135724	0.13585	0.135999	0.135926	0.136697	0.136553	0.136979	0.137105	0.136951	0.137194	0.137686	0.137598	0.137535	0.137533	0.137576	0.137991	0.137885	0.137374	0.137098	0.13721	0.137288	0.137309	0.13719	0.137459
	0.139973	0.138217	0.135947	0.135334	0.134754	0.133893	0.133619	0.133542	0.133812	0.133653	0.133695	0.133848	0.133394	0.133786	0.133816	0.133467	0.133752	0.133736	0.1339	0.133661	0.134123	0.133902	0.134348	0.134222	0.134476	0.134123	0.134217	0.134421	0.134446	0.134875	0.135103	0.135124	0.13533	0.135364	0.135523	0.136119	0.135946	0.135879	0.135763	0.135899	0.136137	0.135905	0.13554	0.135588	0.135535	0.135486	0.135532	0.135637	0.135789
	0.13969	0.138273	0.135892	0.135101	0.13463	0.133772	0.133597	0.133405	0.133704	0.133442	0.133548	0.133425	0.133203	0.133798	0.133773	0.133256	0.13367	0.133689	0.134093	0.133679	0.134092	0.133845	0.13406	0.134181	0.134403	0.134364	0.134653	0.134572	0.134736	0.135012	0.13499	0.13532	0.135529	0.135705	0.135804	0.136247	0.136085	0.136348	0.136136	0.136241	0.136413	0.136357	0.135891	0.135872	0.135525	0.135779	0.135783	0.13585	0.136074
	0.138543	0.136827	0.1346	0.133968	0.133126	0.132424	0.132209	0.132215	0.132365	0.132347	0.132292	0.132418	0.132092	0.132356	0.132494	0.132326	0.132495	0.132513	0.132715	0.13225	0.132708	0.13275	0.133067	0.132957	0.133233	0.132875	0.133266	0.133337	0.133447	0.133901	0.1338	0.134039	0.13424	0.13414	0.13457	0.135057	0.134856	0.135039	0.13478	0.134853	0.135364	0.134853	0.134642	0.134733	0.134464	0.13476	0.134658	0.134806	0.135033
	0.148519	0.146645	0.144369	0.143531	0.143008	0.142276	0.141887	0.141901	0.142227	0.141995	0.142092	0.14231	0.141702	0.142234	0.142158	0.14196	0.142143	0.142334	0.142167	0.141966	0.142376	0.142155	0.142592	0.142503	0.142796	0.142438	0.142843	0.142794	0.143073	0.143222	0.143182	0.143677	0.143785	0.143893	0.144319	0.144649	0.144749	0.144541	0.144512	0.144571	0.144873	0.144786	0.144459	0.144448	0.144176	0.144125	0.144247	0.144375	0.14459
	0.137479	0.13576	0.133792	0.132805	0.132397	0.131489	0.131448	0.131494	0.131402	0.131454	0.131605	0.131765	0.131474	0.13173	0.131845	0.131451	0.131658	0.131808	0.13177	0.13165	0.132031	0.131901	0.132346	0.132267	0.132516	0.132404	0.13255	0.132535	0.132792	0.133203	0.133153	0.133649	0.133661	0.133657	0.133821	0.134221	0.134351	0.134254	0.134338	0.134386	0.134509	0.134357	0.134112	0.134164	0.133969	0.133951	0.134317	0.1341	0.134216
	0.140118	0.138432	0.136298	0.13555	0.135006	0.134286	0.134139	0.134237	0.134337	0.134315	0.134262	0.134475	0.134125	0.134739	0.134754	0.134472	0.134913	0.134951	0.135073	0.134939	0.135158	0.135163	0.135558	0.135467	0.135515	0.135336	0.135341	0.135438	0.135505	0.135774	0.135891	0.136189	0.136475	0.136405	0.136576	0.137046	0.1368	0.136947	0.136722	0.136768	0.137256	0.136885	0.136416	0.136818	0.13638	0.136414	0.136657	0.13661	0.136806
	0.132099	0.130523	0.128229	0.127448	0.126879	0.12616	0.125844	0.125971	0.126046	0.126093	0.125924	0.126033	0.125744	0.126141	0.126054	0.125841	0.12596	0.126043	0.126201	0.125974	0.126334	0.126229	0.126542	0.126558	0.126884	0.126381	0.126695	0.12695	0.126956	0.127323	0.127406	0.127713	0.127645	0.127691	0.127868	0.128279	0.128106	0.128165	0.128022	0.127937	0.128042	0.128053	0.127692	0.127632	0.127596	0.127678	0.127681	0.127741	0.127971
	0.128163	0.126567	0.124513	0.123764	0.123345	0.122462	0.122325	0.122237	0.122546	0.12243	0.122498	0.122785	0.122512	0.122709	0.122884	0.122526	0.122828	0.122717	0.122983	0.122762	0.12317	0.123164	0.123297	0.123373	0.123477	0.123252	0.123305	0.123663	0.123644	0.123966	0.124124	0.124426	0.124344	0.12435	0.124535	0.124758	0.124781	0.12483	0.124888	0.124823	0.124943	0.124767	0.124613	0.124518	0.124646	0.124572	0.124628	0.124574	0.12461
	0.133361	0.131833	0.129893	0.129134	0.128447	0.127715	0.127554	0.127454	0.127782	0.127393	0.127573	0.127779	0.127402	0.127639	0.127876	0.127619	0.127782	0.127862	0.12792	0.127731	0.128167	0.127692	0.128068	0.12809	0.12827	0.128094	0.128322	0.128315	0.128601	0.128714	0.128794	0.129002	0.129189	0.129081	0.129328	0.129896	0.129725	0.129652	0.129679	0.129936	0.130023	0.129801	0.129574	0.12959	0.129587	0.129545	0.129663	0.129617	0.129729
	0.13383	0.13207	0.129986	0.129139	0.128719	0.12773	0.127559	0.127547	0.127769	0.127588	0.127701	0.127938	0.127446	0.127784	0.127959	0.127584	0.127839	0.127984	0.127861	0.127609	0.128082	0.128103	0.128208	0.128427	0.128619	0.128316	0.128437	0.128633	0.1286	0.128899	0.129048	0.129292	0.129295	0.129342	0.12973	0.130131	0.129889	0.130073	0.129898	0.130002	0.130314	0.130009	0.129657	0.129724	0.129642	0.129587	0.129836	0.129781	0.129789
	0.142232	0.140419	0.138064	0.13719	0.136827	0.135896	0.135575	0.135499	0.135815	0.135543	0.135742	0.135872	0.135417	0.135835	0.135789	0.135578	0.135557	0.135796	0.135751	0.135484	0.13604	0.135636	0.136019	0.135991	0.136299	0.135752	0.13624	0.136115	0.136455	0.136607	0.136833	0.137184	0.137227	0.137409	0.137734	0.138126	0.137973	0.138196	0.137899	0.137979	0.138192	0.13787	0.137779	0.137506	0.137689	0.137484	0.137562	0.137675	0.137731
	0.126331	0.124696	0.122687	0.121813	0.1214	0.120445	0.120121	0.120219	0.120311	0.120071	0.120177	0.12035	0.120162	0.120456	0.120501	0.120376	0.120359	0.120414	0.12057	0.120448	0.120692	0.120683	0.12107	0.121052	0.121192	0.120652	0.120884	0.121156	0.121387	0.121397	0.121446	0.121689	0.121809	0.121766	0.121977	0.122245	0.121972	0.122014	0.122258	0.122174	0.122461	0.12226	0.122036	0.121825	0.121912	0.121893	0.122189	0.122027	0.122167
	0.128124	0.126787	0.124574	0.123824	0.123374	0.122392	0.122051	0.12201	0.122163	0.122062	0.122164	0.122389	0.121986	0.122312	0.122308	0.122281	0.12233	0.122239	0.12254	0.122349	0.122657	0.122494	0.122752	0.122963	0.122881	0.122724	0.12274	0.122897	0.123031	0.123443	0.123435	0.12369	0.123872	0.123632	0.124052	0.124233	0.124182	0.124288	0.124191	0.12424	0.124508	0.124212	0.123856	0.123971	0.123832	0.123966	0.123933	0.123845	0.124023
	0.128654	0.127095	0.125068	0.124186	0.123758	0.122916	0.12263	0.122694	0.122802	0.122571	0.122588	0.122737	0.122455	0.122817	0.122794	0.122555	0.122769	0.122856	0.122908	0.122673	0.123033	0.122953	0.123085	0.123155	0.123206	0.1229	0.12318	0.123173	0.123285	0.123575	0.123691	0.123871	0.123907	0.123987	0.124131	0.124543	0.124402	0.124408	0.124537	0.124428	0.124598	0.12446	0.124195	0.124208	0.124017	0.124179	0.124183	0.124236	0.124267
	0.133756	0.132408	0.130058	0.129471	0.129014	0.12813	0.127689	0.127796	0.127959	0.127914	0.127986	0.128209	0.127763	0.128149	0.12825	0.128061	0.128072	0.12839	0.128412	0.128097	0.128386	0.128458	0.128703	0.128798	0.129092	0.128848	0.12905	0.129231	0.129162	0.129571	0.129675	0.130142	0.130082	0.130291	0.13035	0.130829	0.130643	0.130779	0.130556	0.130795	0.131055	0.130758	0.130464	0.130663	0.13046	0.130661	0.130559	0.13067	0.130942
	0.134588	0.132797	0.130677	0.129938	0.129425	0.128641	0.128532	0.128606	0.128591	0.128644	0.128649	0.128762	0.128375	0.128835	0.128722	0.128573	0.128653	0.128744	0.128736	0.128409	0.128944	0.128786	0.12894	0.129051	0.129077	0.128725	0.128902	0.128849	0.129028	0.129487	0.129578	0.129873	0.129745	0.129993	0.130168	0.130424	0.130287	0.130562	0.130204	0.130458	0.130716	0.130672	0.130098	0.130363	0.130242	0.130231	0.130116	0.130188	0.130472
	0.134438	0.132679	0.130171	0.129359	0.128769	0.1278	0.127347	0.127304	0.127349	0.127307	0.127359	0.127468	0.127106	0.127445	0.127539	0.127262	0.127289	0.127434	0.127446	0.127297	0.127543	0.127594	0.127855	0.127836	0.127962	0.127546	0.127722	0.127859	0.127901	0.128187	0.128481	0.128656	0.128577	0.128604	0.128984	0.129135	0.129102	0.129074	0.129077	0.129238	0.129275	0.129133	0.128751	0.128731	0.128565	0.128786	0.128787	0.128676	0.12905
	0.13286	0.132318	0.131384	0.131259	0.130822	0.130362	0.130493	0.130441	0.130315	0.130455	0.130831	0.130829	0.13116	0.130834	0.130537	0.131111	0.130885	0.131344	0.131064	0.131312	0.131394	0.131545	0.131484	0.13138	0.131244	0.130877	0.130603	0.130387	0.129652	0.129474	0.129237	0.128692	0.128981	0.128421	0.128541	0.128098	0.128301	0.129197	0.12907	0.129114	0.128943	0.128425	0.127545	0.129296	0.129594	0.129739	0.129229	0.129426	0.129912
	0.116675	0.116509	0.116615	0.116616	0.116673	0.116408	0.116518	0.116897	0.117021	0.116467	0.117181	0.116739	0.11701	0.116856	0.117212	0.117215	0.11782	0.117972	0.118044	0.117859	0.11805	0.118036	0.118111	0.117953	0.118149	0.118257	0.118169	0.118253	0.118548	0.118227	0.11821	0.118395	0.118125	0.11809	0.118363	0.118666	0.118579	0.11873	0.118674	0.11836	0.118547	0.118157	0.118233	0.118244	0.118488	0.118537	0.118619	0.118789	0.118897
	0.111495	0.111358	0.11166	0.111551	0.111703	0.111374	0.111454	0.111762	0.111888	0.111641	0.112238	0.111804	0.112039	0.111973	0.112026	0.112165	0.112499	0.112757	0.112702	0.112729	0.112789	0.112784	0.112799	0.112677	0.112907	0.113003	0.112776	0.113012	0.113181	0.113032	0.113096	0.113012	0.112933	0.112839	0.113202	0.113293	0.113222	0.113287	0.11331	0.112837	0.113069	0.112776	0.112664	0.112761	0.112822	0.112915	0.113139	0.113284	0.113178
	0.118518	0.118511	0.118549	0.118409	0.118587	0.118252	0.118329	0.118703	0.11896	0.118342	0.119079	0.118595	0.118845	0.118755	0.118901	0.119	0.119537	0.119834	0.119736	0.119715	0.119599	0.119854	0.11982	0.119603	0.11971	0.120023	0.119842	0.120065	0.120262	0.120167	0.119962	0.120058	0.120052	0.11983	0.120415	0.120511	0.120513	0.120608	0.120628	0.120342	0.12029	0.120087	0.120068	0.120261	0.120274	0.120335	0.120493	0.120711	0.120827
	0.117839	0.117928	0.117825	0.117851	0.117951	0.117679	0.117631	0.117931	0.118179	0.117611	0.118361	0.117867	0.118166	0.118014	0.118168	0.118301	0.118845	0.119035	0.119137	0.118988	0.119089	0.119081	0.119012	0.118889	0.119171	0.119355	0.119267	0.119384	0.119717	0.119575	0.119286	0.119412	0.119269	0.1193	0.119628	0.119981	0.119814	0.119921	0.120081	0.119411	0.119611	0.119213	0.11927	0.119279	0.119406	0.11947	0.119825	0.11989	0.119894
	0.127795	0.127814	0.127863	0.128019	0.12804	0.12752	0.12748	0.128036	0.12818	0.127444	0.128307	0.127717	0.128132	0.128081	0.128326	0.128646	0.129009	0.12948	0.12958	0.129574	0.129469	0.129723	0.129816	0.129618	0.129726	0.130081	0.129673	0.129828	0.130059	0.130221	0.129773	0.130168	0.129961	0.129745	0.130341	0.130701	0.130486	0.130714	0.130808	0.130568	0.130496	0.130061	0.130073	0.130099	0.13008	0.130138	0.13051	0.130509	0.130588
	0.127329	0.127337	0.127213	0.127062	0.127118	0.126711	0.126549	0.127238	0.127212	0.126709	0.127476	0.12684	0.127268	0.126917	0.127377	0.127368	0.127897	0.128221	0.128503	0.128431	0.128463	0.128655	0.128527	0.12825	0.128846	0.129096	0.128897	0.129035	0.129651	0.129424	0.12906	0.129477	0.129284	0.129173	0.129504	0.129898	0.129816	0.129987	0.129989	0.129898	0.129732	0.129228	0.129307	0.129259	0.129203	0.129163	0.129597	0.129756	0.129482
	0.119244	0.119095	0.119099	0.119032	0.119121	0.118645	0.118583	0.118948	0.119233	0.118631	0.119295	0.118804	0.119081	0.118949	0.119182	0.119003	0.119481	0.119628	0.119907	0.119607	0.119862	0.11995	0.119702	0.119493	0.119732	0.119836	0.119631	0.119917	0.120125	0.119957	0.119711	0.119949	0.119697	0.119402	0.119923	0.120153	0.120008	0.120189	0.120128	0.119802	0.1198	0.119443	0.119411	0.11953	0.119579	0.119573	0.11989	0.119958	0.120097
	0.122387	0.12226	0.122312	0.122188	0.122307	0.121956	0.121818	0.122429	0.122558	0.121909	0.122712	0.122126	0.122526	0.122159	0.122466	0.122455	0.123113	0.123368	0.123349	0.123203	0.123296	0.123385	0.123296	0.123133	0.123351	0.123601	0.123331	0.123548	0.123875	0.123786	0.123374	0.123463	0.123565	0.123387	0.123818	0.124038	0.124107	0.124123	0.1243	0.123693	0.123783	0.123636	0.1235	0.123782	0.123854	0.123786	0.124011	0.124175	0.124098
	0.118544	0.118295	0.118336	0.118327	0.11829	0.118122	0.11805	0.118451	0.118717	0.118144	0.118937	0.118352	0.118609	0.118245	0.11851	0.11863	0.119109	0.119345	0.119355	0.119235	0.119323	0.119383	0.119224	0.119138	0.119138	0.119398	0.119231	0.119428	0.119498	0.119511	0.11932	0.119423	0.11941	0.119229	0.119452	0.11968	0.119602	0.119689	0.119558	0.119121	0.119215	0.11898	0.118942	0.118972	0.119032	0.119016	0.119299	0.11946	0.119345
	0.114879	0.114604	0.114858	0.114889	0.115147	0.114845	0.114814	0.115376	0.115605	0.11493	0.115628	0.115433	0.115684	0.115495	0.115696	0.115661	0.116336	0.116459	0.116197	0.116343	0.116543	0.116482	0.11651	0.116369	0.116555	0.116456	0.116389	0.116526	0.116869	0.116474	0.116241	0.116462	0.116391	0.116198	0.116646	0.116611	0.116543	0.116695	0.116636	0.116153	0.116195	0.115935	0.115565	0.115871	0.115986	0.115972	0.116111	0.116225	0.116399
	0.11778	0.117886	0.11792	0.117949	0.117994	0.117653	0.117592	0.118175	0.118415	0.117792	0.118542	0.1181	0.118257	0.118294	0.118442	0.118686	0.119013	0.119306	0.119349	0.119411	0.119664	0.119621	0.119542	0.119364	0.119701	0.119935	0.119624	0.119905	0.120278	0.1202	0.12005	0.120072	0.119941	0.119854	0.12037	0.120825	0.120979	0.121032	0.120923	0.120468	0.120582	0.120205	0.120058	0.12012	0.120011	0.120065	0.120201	0.120232	0.120452
	0.113236	0.113036	0.113275	0.11316	0.113297	0.113043	0.1131	0.113519	0.113696	0.113132	0.113912	0.113699	0.113921	0.113924	0.114117	0.114204	0.114619	0.115029	0.114938	0.11504	0.114862	0.115006	0.115004	0.114947	0.115232	0.115356	0.115499	0.115475	0.115724	0.115705	0.115463	0.115586	0.115549	0.115441	0.115825	0.11606	0.116063	0.116077	0.116143	0.115767	0.115792	0.115678	0.115636	0.115624	0.115782	0.115909	0.115976	0.116166	0.116312
	0.11691	0.116912	0.117049	0.11691	0.117009	0.116872	0.116848	0.117371	0.117655	0.117089	0.117729	0.117351	0.117693	0.117474	0.11782	0.117833	0.118481	0.118504	0.118676	0.118686	0.118752	0.118903	0.118793	0.118707	0.11893	0.119104	0.118858	0.119119	0.119308	0.119183	0.119006	0.119104	0.118935	0.118863	0.119371	0.119531	0.119515	0.119499	0.119712	0.119169	0.119296	0.118932	0.118885	0.118957	0.119162	0.119154	0.119218	0.119414	0.119716
	0.128413	0.128249	0.128299	0.128018	0.128087	0.127803	0.127701	0.128118	0.128276	0.127695	0.128442	0.127721	0.128058	0.127877	0.128107	0.12819	0.12884	0.128953	0.129094	0.12891	0.129143	0.129007	0.129064	0.128718	0.128912	0.129336	0.129086	0.129294	0.129522	0.129253	0.128971	0.129043	0.129017	0.128958	0.129302	0.12982	0.129617	0.129946	0.129853	0.129492	0.129657	0.129375	0.129234	0.129416	0.129468	0.129569	0.12975	0.129975	0.129835
	0.117261	0.117183	0.117184	0.117333	0.117259	0.117179	0.117145	0.117494	0.117641	0.117075	0.117912	0.117471	0.117834	0.117615	0.117844	0.117943	0.118371	0.118733	0.11859	0.118665	0.118749	0.118815	0.118762	0.118718	0.118803	0.118936	0.118939	0.118997	0.119311	0.119112	0.118939	0.118977	0.118728	0.118723	0.119079	0.119331	0.119396	0.119393	0.119363	0.118928	0.118962	0.118808	0.11877	0.118777	0.119027	0.118936	0.119078	0.119214	0.119281
	0.116017	0.115753	0.115809	0.11591	0.116039	0.115669	0.115725	0.116131	0.116402	0.115846	0.116594	0.116009	0.116401	0.116208	0.116432	0.116397	0.117047	0.117226	0.117189	0.117231	0.117266	0.117267	0.117122	0.117055	0.117448	0.117466	0.117285	0.117467	0.117876	0.11758	0.117481	0.117459	0.117341	0.117315	0.117699	0.118025	0.117805	0.117866	0.118033	0.117671	0.117658	0.117526	0.117357	0.117287	0.117548	0.117605	0.117718	0.117801	0.117673
	0.120279	0.120319	0.120337	0.12027	0.120426	0.120166	0.11996	0.120388	0.120681	0.12022	0.120929	0.12042	0.12064	0.120525	0.120708	0.120815	0.121356	0.121605	0.121727	0.121458	0.121662	0.1217	0.121571	0.121471	0.121663	0.122011	0.121769	0.121998	0.122284	0.122053	0.121944	0.121902	0.121885	0.121671	0.122017	0.12243	0.122263	0.122407	0.122337	0.122008	0.122169	0.121765	0.121797	0.121883	0.122071	0.122083	0.122181	0.122355	0.122483
	0.118441	0.118355	0.118375	0.118314	0.118445	0.118277	0.118291	0.118657	0.118825	0.118346	0.118969	0.118631	0.119052	0.118587	0.11906	0.119035	0.119618	0.119795	0.11982	0.119755	0.119957	0.119919	0.119738	0.119749	0.119978	0.120291	0.119977	0.120211	0.120389	0.120405	0.12012	0.120216	0.120349	0.120199	0.120497	0.120755	0.120686	0.120781	0.120888	0.120507	0.120529	0.120289	0.12021	0.12024	0.120476	0.120448	0.120716	0.120924	0.120852
	0.12101	0.120895	0.121027	0.12102	0.120987	0.120807	0.120825	0.121085	0.121414	0.120939	0.12152	0.121157	0.121292	0.121101	0.121446	0.12136	0.122071	0.122236	0.122359	0.122207	0.122274	0.122455	0.122293	0.122111	0.122381	0.122435	0.122239	0.122651	0.12277	0.122611	0.122325	0.12239	0.122271	0.12219	0.122489	0.122785	0.122711	0.122879	0.12288	0.122391	0.122629	0.122341	0.12226	0.122222	0.122475	0.122431	0.122681	0.122987	0.122874
	0.110458	0.11045	0.110693	0.110816	0.111133	0.11093	0.11095	0.111377	0.111571	0.11104	0.11182	0.111386	0.11163	0.111571	0.111727	0.111901	0.11221	0.112332	0.112379	0.112339	0.112425	0.11252	0.112572	0.112536	0.112626	0.112742	0.112527	0.112692	0.113016	0.11277	0.112759	0.112792	0.112907	0.112742	0.1131	0.113224	0.113116	0.11303	0.113064	0.112737	0.112835	0.112582	0.112502	0.112574	0.112807	0.112817	0.113035	0.113069	0.113277
	0.113255	0.113204	0.113469	0.113558	0.11363	0.113477	0.113415	0.113841	0.114081	0.113586	0.114273	0.114009	0.114297	0.114173	0.114237	0.11446	0.114731	0.115008	0.115036	0.115051	0.115135	0.115173	0.115219	0.115123	0.11526	0.115287	0.115156	0.115461	0.115655	0.115455	0.11532	0.115436	0.115401	0.115242	0.115582	0.115799	0.115699	0.115762	0.11575	0.11531	0.115603	0.115068	0.115213	0.115168	0.115527	0.115553	0.115672	0.115887	0.11602
	0.119566	0.119481	0.119754	0.119626	0.119858	0.119546	0.119448	0.119952	0.119961	0.11959	0.120177	0.119942	0.12038	0.120006	0.120463	0.120475	0.120869	0.121176	0.121273	0.121077	0.121052	0.121407	0.12134	0.121106	0.121395	0.121515	0.121259	0.121462	0.121758	0.121686	0.121416	0.121478	0.12156	0.121323	0.121739	0.12196	0.121902	0.122167	0.122234	0.121701	0.121894	0.121789	0.121657	0.12179	0.12174	0.121909	0.122081	0.122199	0.122333
	0.116846	0.116724	0.116901	0.116809	0.11702	0.116699	0.11655	0.117118	0.117319	0.116735	0.117375	0.117137	0.117167	0.117117	0.117305	0.117332	0.117774	0.118106	0.118103	0.118111	0.11823	0.118137	0.118089	0.11803	0.118206	0.118347	0.118129	0.118387	0.118723	0.118645	0.118468	0.118435	0.118456	0.118412	0.11887	0.118912	0.118844	0.119088	0.119043	0.118745	0.118822	0.118523	0.118459	0.118552	0.118629	0.118662	0.118845	0.119118	0.11917
	0.12301	0.122769	0.123077	0.122768	0.123027	0.12261	0.122475	0.122925	0.123201	0.122628	0.123306	0.122965	0.122989	0.122764	0.122999	0.123249	0.123637	0.124067	0.124121	0.123815	0.123792	0.124125	0.123939	0.123954	0.124094	0.124293	0.124038	0.124372	0.124672	0.124548	0.124274	0.124172	0.124225	0.124004	0.124619	0.1249	0.124771	0.12491	0.124786	0.124534	0.124749	0.124215	0.124331	0.1245	0.124571	0.124515	0.124663	0.124694	0.124867
	0.110895	0.110971	0.111012	0.111171	0.111276	0.110999	0.110857	0.111428	0.111692	0.110993	0.111757	0.111235	0.111631	0.111592	0.111753	0.111848	0.112339	0.112486	0.112367	0.112451	0.112658	0.112514	0.112441	0.112478	0.112588	0.112748	0.112651	0.112862	0.113098	0.112738	0.112715	0.112861	0.112689	0.112558	0.113092	0.112947	0.113003	0.112955	0.112807	0.112702	0.112542	0.112427	0.11237	0.112413	0.112527	0.112344	0.11275	0.112801	0.112765
	0.113181	0.113193	0.113563	0.113527	0.113543	0.113385	0.113378	0.113839	0.114043	0.113676	0.114251	0.113885	0.114393	0.114272	0.114359	0.114362	0.11491	0.115148	0.115316	0.115232	0.115285	0.115541	0.115306	0.115033	0.115446	0.115592	0.115358	0.115608	0.115644	0.11544	0.115558	0.11552	0.115533	0.115267	0.115619	0.115855	0.115748	0.115728	0.115795	0.115407	0.115569	0.115114	0.115146	0.1151	0.11554	0.115411	0.115804	0.115789	0.11576
	0.116168	0.116149	0.116177	0.116062	0.11634	0.11624	0.116194	0.116574	0.116839	0.116445	0.117098	0.116782	0.117145	0.117001	0.117223	0.117159	0.117804	0.117807	0.117865	0.117884	0.117933	0.118126	0.117952	0.117821	0.117923	0.118066	0.11785	0.118151	0.118334	0.118027	0.117886	0.118037	0.117957	0.117757	0.118133	0.118495	0.118341	0.118301	0.118273	0.117986	0.118213	0.117676	0.117678	0.117894	0.118214	0.118135	0.11828	0.118432	0.118563
	0.118693	0.118552	0.118738	0.118606	0.118669	0.11845	0.118423	0.118727	0.118898	0.118462	0.119182	0.118903	0.119062	0.118789	0.118991	0.119363	0.119624	0.119709	0.119903	0.119817	0.119729	0.119749	0.119887	0.119814	0.119891	0.120027	0.119837	0.11994	0.120216	0.120058	0.11998	0.120044	0.119938	0.119814	0.120282	0.120362	0.120358	0.120258	0.120368	0.119934	0.119987	0.119794	0.119632	0.119712	0.119718	0.119674	0.119962	0.119989	0.120111
	0.117112	0.117146	0.117014	0.11714	0.117163	0.116885	0.11686	0.117075	0.11759	0.117057	0.117891	0.117334	0.117624	0.117554	0.117676	0.11754	0.118226	0.118685	0.118393	0.118358	0.118657	0.118572	0.118643	0.118559	0.118623	0.118722	0.118632	0.118804	0.119167	0.119152	0.118943	0.118938	0.118848	0.118963	0.119211	0.119213	0.119413	0.119175	0.119377	0.118774	0.118906	0.118789	0.11877	0.118697	0.118645	0.118778	0.119032	0.119027	0.119081
Time (s)	0	2	4	6	8	10	12	14	16	18	20	22	24	26	28	30	32	34	36	38	40	42	44	46	48	50	52	54	56	58	60	62	64	66	68	70	72	74	76	78	80	82	84	86	88	90	92	94	96
[truncated: 258 more columns]

## Sheet: panel C
	0.120019	0.120115	0.117473	0.115869	0.114902	0.114483	0.113649	0.113153	0.114041	0.114566	0.114949	0.1161	0.116079	0.116377	0.116477	0.116839	0.116799	0.116877	0.117619	0.118092	0.11836	0.118244	0.118575	0.11897	0.119105	0.122303	0.121565	0.130078	0.13389	0.140324	0.167857	0.220663	0.250384	0.255507	0.251371	0.245074	0.239033	0.234217	0.229035	0.2226	0.217939	0.213089	0.212586	0.211324	0.206446	0.200636	0.198124	0.194479	0.190546
	0.120857	0.121638	0.118889	0.117357	0.116706	0.116517	0.115266	0.114589	0.114931	0.115534	0.116133	0.11691	0.117065	0.117376	0.117256	0.117564	0.11698	0.117175	0.117663	0.118328	0.118462	0.118095	0.118804	0.119095	0.119095	0.122272	0.124463	0.132708	0.1326	0.131056	0.132457	0.133511	0.133836	0.135804	0.138435	0.142827	0.146989	0.152703	0.159889	0.17095	0.180116	0.189428	0.195571	0.19784	0.196143	0.195087	0.1943	0.192496	0.190986
	0.146389	0.144166	0.140641	0.140077	0.138153	0.136728	0.136013	0.135598	0.135646	0.13573	0.135732	0.135425	0.135236	0.135592	0.135178	0.135161	0.135706	0.135542	0.135819	0.135794	0.135879	0.13595	0.136453	0.136178	0.136169	0.136253	0.135621	0.136379	0.137271	0.139833	0.142975	0.149526	0.159727	0.177462	0.203473	0.221318	0.228249	0.230188	0.228806	0.225566	0.22029	0.214252	0.208851	0.204402	0.19997	0.196057	0.192015	0.187482	0.183731
	0.145219	0.143081	0.139038	0.138102	0.1364	0.135	0.134718	0.134236	0.134252	0.134331	0.133823	0.133547	0.132807	0.132866	0.132596	0.131922	0.132626	0.132489	0.132718	0.132593	0.132546	0.132489	0.132839	0.132146	0.132404	0.133856	0.133899	0.135284	0.138168	0.141216	0.142946	0.148389	0.151869	0.153291	0.15986	0.167662	0.177549	0.189769	0.193042	0.196067	0.19742	0.195421	0.1913	0.185426	0.179528	0.17489	0.169514	0.165407	0.161634
	0.156758	0.148603	0.147911	0.1468	0.144354	0.143543	0.144019	0.143103	0.141269	0.139901	0.139522	0.138892	0.138656	0.13767	0.137899	0.137091	0.136316	0.13585	0.136269	0.136401	0.137033	0.137788	0.137634	0.138166	0.137807	0.139505	0.137463	0.137095	0.138207	0.139814	0.141334	0.141716	0.144673	0.14665	0.147155	0.15055	0.153852	0.15463	0.155766	0.158546	0.16021	0.161914	0.163335	0.162814	0.163256	0.164146	0.165235	0.164296	0.163342
	0.137198	0.135053	0.131124	0.130338	0.128336	0.12687	0.126435	0.125756	0.125578	0.1255	0.125216	0.124823	0.124182	0.124553	0.12426	0.123869	0.124086	0.124	0.12422	0.124113	0.123935	0.124407	0.124412	0.124208	0.123889	0.123593	0.122687	0.123148	0.123912	0.124853	0.125201	0.125468	0.124918	0.125392	0.125621	0.126247	0.126114	0.126726	0.127268	0.126955	0.126758	0.126871	0.127133	0.127596	0.127142	0.126823	0.126867	0.126577	0.126552
	0.141245	0.138975	0.135288	0.134927	0.132725	0.131127	0.130496	0.129785	0.129714	0.129843	0.129445	0.129328	0.129231	0.129201	0.128748	0.128303	0.12896	0.128755	0.129342	0.12876	0.128955	0.128803	0.12919	0.128561	0.128787	0.128761	0.128238	0.128633	0.130211	0.131696	0.133532	0.135212	0.137622	0.139589	0.140469	0.143041	0.144995	0.146739	0.14924	0.149698	0.149522	0.149606	0.149742	0.149811	0.149563	0.149319	0.148171	0.147897	0.148126
	0.124706	0.125766	0.122967	0.121669	0.120627	0.120438	0.119366	0.118725	0.119069	0.11952	0.120027	0.120583	0.120888	0.120968	0.12029	0.120748	0.120306	0.120053	0.120422	0.120843	0.120857	0.120847	0.121216	0.1215	0.121244	0.122617	0.122874	0.131378	0.137589	0.151163	0.164569	0.172761	0.176918	0.181754	0.184808	0.189034	0.194978	0.203348	0.211206	0.21421	0.212282	0.209842	0.209935	0.205446	0.200125	0.194242	0.190848	0.186392	0.183309
	0.125193	0.126408	0.123634	0.122191	0.121365	0.12087	0.120084	0.119073	0.11941	0.119749	0.120369	0.121026	0.12123	0.121619	0.120763	0.120975	0.120268	0.120099	0.120505	0.12109	0.121085	0.120957	0.120989	0.121584	0.121584	0.1223	0.121326	0.127071	0.126756	0.125497	0.126605	0.128465	0.12894	0.130613	0.133082	0.135674	0.140036	0.145732	0.150421	0.15269	0.152299	0.152342	0.153215	0.152383	0.148986	0.146638	0.14502	0.142714	0.141263
Time (s)	0	2	4	6	8	10	12	14	16	18	20	22	24	26	28	30	32	34	36	38	40	42	44	46	48	50	52	54	56	58	60	62	64	66	68	70	72	74	76	78	80	82	84	86	88	90	92	94	96
[truncated: 258 more columns]

## Sheet: Panel D
NS shRNA hNPC	19.6883	19.7685	20.6183	20.1212	20.0909	20.381	20.2644	19.5179	20.3745	18.7938	14.4939	13.9666	13.6392	13.0205	12.3088	12.6644	12.2876	12.7599	13.574	14.2729	15.768	17.6768	19.1007	21.564	24.2735	26.4675	29.6042	32.764	35.5711	39.2816	42.0729	44.0584	47.2392	49.8176	52.6985	55.2339	57.0119	57.6478	58.6384	60.3448	61.5585	61.6317	62.5698	63.4281	64.0011	65.3302	66.0272	67.7155	66.6892
	18.0057	16.3763	15.9209	14.5584	14.2781	13.4993	12.8544	13.4623	13.495	13.2812	11.8107	11.3293	11.7002	11.3798	10.8373	10.5071	10.0302	10.568	10.7622	11.4622	12.571	13.5953	15.2	16.8802	19.3394	21.8536	24.1153	27.2968	30.4677	33.5421	36.8736	39.3811	42.3511	45.157	47.7891	50.5334	52.414	54.4452	57.0168	57.8354	60.0691	61.8278	63.1137	64.831	65.6457	67.3718	67.9416	69.3456	69.9578
	19.5612	19.367	19.1393	18.6989	18.6064	18.0018	17.7901	17.7109	18.2243	17.3529	17.3924	17.3581	18.5558	18.1106	17.379	17.3516	17.0636	17.2153	16.7726	17.4337	19.0118	20.6403	22.1343	24.1084	26.3571	29.0295	30.9165	33.8766	35.7862	37.8147	40.2823	42.3176	44.5412	47.4251	49.1764	51.7167	54.1181	56.5629	58.3951	60.2871	61.7174	63.7082	65.5827	66.9614	68.3844	69.1677	70.3937	71.4804	72.4467
	14.5582	14.2644	15.2182	14.684	14.198	14.6107	14.2996	14.5687	15.0138	15.2881	18.0075	16.551	17.3075	16.9094	16.0168	16.1387	16.3692	16.8898	18.0205	19.7413	20.9498	22.5307	25.988	28.8125	33.1924	37.3256	40.9949	45.2166	49.4861	52.261	55.5578	59.2704	62.7695	65.7976	69.4717	72.8586	74.7116	78.1217	81.0079	83	85.7836	87.7295	89.742	90.5212	92.3014	92.7981	94.1522	95.071	95.736
	25.1657	25.1991	25.2067	24.3353	25.2381	24.6919	25.2203	24.5947	25.6114	25.7528	26.798	25.8004	25.8132	26.8954	26.9347	27.1872	27.6397	28.1924	28.3845	29.6416	31.641	32.138	33.3168	35.1976	36.6204	37.9065	40.4779	42.5576	43.5197	45.4709	47.7878	49.2355	51.0107	52.2514	53.6435	55.7535	56.739	57.6557	59.2757	60.7029	61.5713	63.2246	64.4571	64.3274	65.4837	66.3058	66.7968	68.0496	68.7176
	17.0231	16.3896	16.6511	16.4223	15.9405	16.0725	15.6366	15.6393	16.0901	15.7227	16.0671	16.2173	16.934	16.5199	15.6177	16.356	16.5217	16.9964	17.4949	18.36	20.284	21.0168	23.1969	25.6066	28.6911	31.3285	34.7229	38.1121	41.0694	44.8667	49.2298	51.8487	55.758	59.3594	62.2749	65.7618	68.4983	71.6025	74.8891	77.2332	80.5809	83.2397	85.2673	88.1581	90.2433	93.55	95.9373	97.2141	98.2354
	15.9215	16.0258	16.3693	16.0519	16.507	16.3437	16.4709	16.7685	18.619	18.7324	22.8986	22.401	21.9975	21.7908	20.8845	21.884	21.2618	22.0014	22.1876	22.403	24.1534	25.6578	27.985	29.8121	33.1595	35.5122	38.2466	41.7376	43.4286	47.6444	51.1746	53.8676	58.9043	61.3268	66.1577	69.1413	72.529	75.6169	78.4465	80.6895	82.7076	84.9446	87.504	90.3666	92.2879	94.6384	96.3843	99.2042	102.616
	18.2024	18.5867	18.8797	19.4816	19.0838	18.7303	18.2183	17.9773	19.3899	19.2824	19.5228	19.0751	19.8782	20.0853	19.7287	20.2963	20.9813	21.1517	21.7338	22.4691	24.2739	25.2794	27.4717	30.7252	33.1945	36.3366	39.3665	43.6846	47.4534	51.2572	55.2089	58.6441	63.2259	66.0322	70.1135	74.0497	77.5536	81.3219	84.3266	87.4431	91.1866	94.675	97.2173	100.059	102.508	105.405	108.452	111.119	113.478
	28.193	27.6092	28.3711	27.2711	28.3964	27.7055	27.9251	28.2961	28.8558	28.1437	29.6869	29.9139	30.2549	30.0843	30.2534	30.0932	30.7964	30.819	31.6221	31.7319	32.3129	32.9697	34.1048	35.8358	37.1654	39.0594	40.1005	41.6363	43.4093	45.8215	46.1737	48.6649	50.2531	51.6134	53.0976	55.317	56.424	57.5886	58.3209	60.6862	61.9764	62.6655	64.6178	65.4193	65.6533	66.8027	68.127	67.9692	69.4783
	18.0867	19.2447	21.2027	20.6497	20.4825	20.1284	19.4397	19.3484	19.0962	18.7434	22.4563	21.2609	20.6974	22.4118	22.8067	23.9067	24.7834	26.3446	26.5386	26.5329	27.5539	28.1062	29.6703	32.6429	35.6782	38.9168	42.4908	46.8759	51.0009	55.0782	59.489	63.2115	68.0864	71.08	75.3158	78.9593	82.9901	85.7219	89.7524	92.2216	95.9137	100.084	103.074	106.931	110.525	113.078	116.811	118.99	121.519
	11.4522	11.5282	13.3717	12.7452	12.6234	11.8745	12.0028	11.7624	12.3069	11.8169	12.4498	12.5726	13.0405	13.7107	13.8455	13.089	13.181	14.1772	14.4262	15.4994	16.9286	18.4055	21.0984	23.5216	27.3703	29.9119	33.1607	36.6792	39.5308	43.129	46.7751	50.4239	54.3212	56.591	60.8424	62.6475	64.5894	68.142	71.4387	73.4593	75.7928	78.023	80.7661	82.3454	83.9582	84.2623	86.6071	87.3985	87.7758
	19.3487	19.2907	20.9028	21.1545	21.3425	21.8861	21.8113	22.1313	21.6154	21.5215	19.4129	18.9511	19.9531	20.5595	19.9177	19.6727	19.5813	20.6933	21.0171	24.3723	26.3491	28.2881	30.9408	33.3678	36.9348	39.5812	41.768	45.5388	48.6815	52.6726	55.8555	58.7747	62.2323	64.9639	67.5809	70.0999	73.0775	76.1082	79.2148	81.5445	83.8577	86.3829	88.2509	90.8805	91.5576	93.3723	95.1213	96.3314	97.887
	11.1617	10.9946	11.5287	11.3853	11.3217	11.7302	11.5492	11.5814	11.8825	12.5166	12.7699	12.4084	12.7757	13.1701	12.8309	13.0617	13.7099	14.172	14.6783	14.617	15.4195	16.4349	17.0381	18.8204	20.8213	23.7609	25.2748	28.0541	29.5179	32.0305	35.8852	38.2278	41.2354	44.4473	47.2916	49.755	52.168	54.6469	57.4531	60.3254	62.058	64.0128	65.8703	67.4935	69.5886	70.7725	72.2496	73.1837	74.6873
	9.73586	9.26246	10.4257	10.2565	9.9213	10.0203	9.90808	10.1623	10.3323	10.4305	10.5987	10.99	11.3748	12.0772	11.1882	11.6279	11.9694	12.9904	13.197	14.0536	14.9093	15.4029	16.659	17.1283	18.9579	21.1499	22.7102	25.8253	28.1099	31.0817	33.1756	36.5888	39.3778	42.4331	45.8678	49.6487	52.434	56.4808	60.6285	64.0999	67.5594	71.0521	74.3583	77.3223	80.5887	83.59	86.7607	89.8967	91.6637
	14.6784	14.6455	15.4939	15.0402	14.9234	15.4337	15.3081	15.0741	15.6208	15.3318	14.7856	14.9275	15.7192	15.1985	14.6449	15.5163	15.6902	16.2977	15.9689	16.2985	17.6213	17.5135	18.5214	19.4569	21.0311	22.5613	23.2804	25.3986	26.5162	29.1365	30.6946	31.9587	34.4033	35.7286	38.03	39.7622	41.5978	42.1784	44.8333	45.8371	48.0203	49.2342	51.1158	52.6781	53.8053	55.2126	55.9386	57.6302	58.6768
	13.8833	13.6544	14.5544	14.4362	14.241	14.3043	14.2289	14.0932	14.0381	13.3239	12.9989	12.4872	12.5119	12.7841	11.8136	12.8858	13.0104	13.6816	14.0155	14.8077	16.0277	17.401	18.97	20.9474	23.3221	25.8232	27.1863	30.8856	33.3913	36.7453	38.4732	41.8625	44.6221	47.232	51.0225	54.1719	56.3651	59.0017	62.8416	64.5222	67.7487	70.6203	71.6306	74.7277	75.4053	78.095	78.9689	79.9752	81.864
	22.3058	22.3653	23.2188	22.9877	23.5668	23.4311	23.2076	22.8524	22.5294	21.7963	21.3269	21.1493	21.649	21.6214	21.2423	21.7233	22.1704	23.9744	23.0294	22.8934	23.1898	23.7416	24.7632	26.0777	28.512	30.7564	33.111	36.6876	40.2683	44.1838	47.9449	51.4897	58.2176	63.089	67.152	72.9573	77.1092	82.1752	87.1754	91.3696	95.6639	99.7366	102.438	105.94	107.886	109.798	111.299	113.381	115.541
	13.7541	13.428	14.1246	13.3611	13.8493	13.8529	13.5474	13.9949	14.3196	14.2496	14.5079	15.0892	15.1716	15.3399	14.8474	15.5174	15.2599	16.3077	16.7155	17.0557	17.6714	18.1775	19.1373	20.4726	21.5998	22.9494	23.824	25.8669	27.0928	28.5625	30.0687	31.7321	33.356	34.9739	37.1252	39.1839	40.7223	42.1736	43.9014	44.7542	46.5969	47.5032	49.4213	50.4125	51.4605	52.1327	52.6798	54.1997	54.5871
	12.5961	13.0377	13.9761	13.5655	13.2024	14.4205	14.5453	15.1196	15.8941	14.9078	14.9354	14.4533	14.7658	14.461	14.2849	14.2863	14.7585	15.3655	15.1379	15.9491	16.4986	17.2034	18.4258	19.236	21.0866	22.7318	24.0453	26.4372	28.4248	30.9145	33.8712	36.4525	39.0975	42.1487	45.5172	49.7342	53.3498	55.2747	58.8223	61.3145	63.0655	65.5191	67.9707	70.4073	72.8654	75.4822	78.2241	79.8939	81.3527
	7.66874	7.57159	7.84254	8.04319	7.82433	8.04711	7.91929	8.76245	9.16797	9.25119	10.3527	10.3709	10.7237	10.3151	10.4732	10.3274	10.4362	11.0795	11.346	12.4663	13.5097	14.5731	17.221	19.1949	24.3092	26.1326	29.7105	33.4191	37.1858	41.0064	43.8518	47.115	51.5771	54.4729	58.7666	65.4777	70.1194	72.4562	75.7313	79.0345	81.6448	84.7435	87.7475	89.0851	90.928	92.7906	94.5755	95.6358	97.2174
	7.1595	7.4458	7.91679	7.98708	8.67903	8.97983	9.33186	9.52453	9.7496	9.13673	9.58953	9.55343	8.9707	8.90049	8.57949	8.91301	9.41979	9.72595	9.90918	10.8072	12.195	13.8082	16.1484	18.2628	20.6116	23.0608	25.1128	28.0914	30.3555	32.7537	35.1051	37.7942	40.4709	42.6527	44.9626	47.2894	49.7408	52.6635	54.2618	55.8346	58.8281	59.8177	62.2221	64.0685	65.2799	67.3075	68.4359	70.2914	70.3823
	16.4974	16.7117	16.9142	17.0215	16.4034	16.6712	16.7578	16.6871	17.7557	17.5245	17.963	17.5284	18.3154	18.4571	18.3982	18.9731	18.508	19.4597	20.1255	20.2076	20.6977	21.6492	23.1085	24.3567	25.664	26.1923	28.1694	30.4742	31.2056	32.7012	34.0815	35.7705	37.8662	38.6256	41.152	43.2822	43.9052	45.425	47.6317	49.1681	50.5388	51.9974	53.4173	54.7495	55.9719	57.0295	58.1562	59.3346	59.8928
	20.4222	20.0107	20.9516	20.2694	20.7193	21.3663	21.2296	22.1222	23.074	22.3405	24.2291	22.932	23.621	23.1356	22.8503	23.2843	23.762	24.6421	24.5485	25.0049	26.0155	27.6017	29.2685	32.323	35.4609	38.2531	41.2756	44.3205	46.7607	50.3998	53.9676	57.0496	61.9287	65.1026	69.7645	73.4487	75.6667	79.1444	81.2683	85.0741	88.302	92.2247	96.3523	98.3629	100.206	102.456	103.009	105.574	107.341
	10.1218	9.93544	9.88655	9.65932	9.87456	9.76141	9.04634	9.44975	9.86924	10.0736	10.6975	11.2164	11.9536	11.8933	11.2805	11.5907	12.073	12.7479	13.0066	14.4131	15.5941	17.8313	20.4235	22.4298	26.9328	30.5217	33.5363	37.7147	41.101	43.7901	47.517	50.5236	53.9998	56.5156	59.6847	63.5168	65.8537	69.9869	73.2	76.6247	78.9674	81.1226	82.9401	84.3945	85.8853	87.1964	88.76	89.3725	90.5409
	17.3702	17.4345	18.6161	18.8566	19.8153	20.3834	19.852	19.2156	19.6016	18.8037	18.8992	18.7779	18.7755	18.8403	18.5232	19.065	19.4463	20.3811	21.7489	22.8327	23.9344	24.3402	26.2012	27.727	30.2955	32.3975	34.9631	38.9523	42.6067	45.963	49.2174	53.0665	58.065	61.9805	67.9049	74.0285	77.6287	81.6802	84.0198	85.3337	88.4347	90.5809	93.0311	94.9786	95.9446	96.5723	97.0175	97.9714	98.732
	22.5345	23.6322	23.1705	23.1659	22.9886	22.7066	22.1668	21.6135	21.9286	21.5576	20.8955	19.8993	20.3729	20.3182	19.2919	19.5946	19.372	20.1113	19.7763	21.2154	22.3742	24.083	25.5111	27.758	31.1648	34.1866	37.0704	40.4946	43.1567	46.6082	49.0108	51.3456	54.6807	56.639	59.5773	62.5929	65.2276	67.5758	70.2306	72.5967	74.8696	76.8025	78.6727	81.448	82.7743	84.202	84.7951	86.2751	87.4255
	25.1086	24.9064	25.4944	26.1893	25.1457	26.2461	25.95	25.9417	26.2636	26.4499	26.3539	26.8912	26.6835	26.6573	26.2744	27.0147	27.3242	27.2388	28.0808	29.1747	30.2626	32.0862	33.5068	35.7732	38.9936	42.0216	45.8125	50.2182	52.6982	56.8884	60.3892	64.6634	68.5238	71.4616	74.8563	78.2121	81.7569	85.545	89.1426	90.7741	94.2269	96.5028	100.31	102.015	105.115	106.325	107.38	108.55	108.919
	19.6181	20.4632	20.7331	22.3963	24.5607	24.635	24.0719	23.1643	23.383	22.3814	23.4518	23.295	23.232	22.8637	21.981	22.1655	22.0355	23.5853	23.6525	24.5911	25.2943	26.5326	28.8784	29.5995	32.3742	33.8844	36.9558	39.6117	42.1812	45.3806	47.3755	49.637	51.777	54.3818	56.8877	59.624	60.9367	63.0392	64.0802	66.0471	66.5651	67.6556	69.1522	70.6436	70.735	71.9024	72.5418	73.3737	73.5077
	9.49317	9.66964	10.8595	10.199	11.6436	11.4242	11.2749	11.45	12.0262	11.8356	10.843	10.3973	10.699	10.794	10.4956	11.5104	10.4408	10.8298	11.534	12.3282	13.4666	15.0128	16.7325	19.2673	22.6808	26.1913	28.7784	33.0328	36.8848	40.4034	43.6594	48.4634	51.0841	55.165	59.5454	63.5317	66.768	71.1956	75.8067	79.1437	83.077	86.4188	89.2736	91.7587	94.8455	97.808	100.461	101.997	102.536
	17.5097	17.7741	19.0998	19.7056	19.4503	19.8004	19.6457	20.1576	20.3858	20.101	16.9068	16.5737	16.816	16.8496	16.3659	16.6144	16.4964	16.9401	17.361	17.8631	19.377	20.5024	22.3055	24.2774	26.8465	29.7417	32.3463	35.7113	38.763	42.1401	45.8528	48.8833	52.6854	56.0648	59.4699	62.9321	65.5264	68.0338	71.276	73.9763	76.8361	80.1422	83.5386	85.5076	86.393	88.4456	89.6501	91.7289	92.1429
	22.3841	22.0046	22.301	22.1271	22.1793	22.2614	22.1629	22.2886	22.8946	22.4457	21.2541	20.4123	20.8425	20.9394	20.7238	19.9734	20.3222	20.1948	21.0677	22.1638	22.6018	23.6022	25.2889	27.3425	30.0234	32.7637	35.9697	40.401	43.5739	48.3945	52.3982	57.4402	62.8283	66.6201	71.74	76.6067	80.658	85.2007	89.6255	92.5148	97.6477	101.011	105.084	108.484	111.659	114.905	116.668	118.951	119.948
	17.2959	17.2991	18.4658	17.3596	18.2085	17.5713	18.3023	18.0627	18.3917	18.197	20.5201	19.1099	19.5099	19.4546	19.4934	19.4401	20.2317	20.3188	20.3191	21.0311	22.3829	23.0795	23.6769	25.9669	28.3399	31.0256	32.6084	35.7401	39.5063	41.9029	45.4776	48.9173	52.3214	55.859	60.2011	63.498	67.3207	70.2537	72.6211	75.4048	78.1887	81.301	83.901	85.0056	86.9441	89.0111	90.4381	91.1298	92.2556
	15.375	15.4095	15.8733	15.9883	15.419	15.9415	14.9576	15.2924	15.803	15.3821	15.1433	14.608	14.562	14.2498	13.9034	13.8182	13.9657	14.5013	14.623	15.4319	16.1826	16.6214	17.8775	19.8553	21.0421	21.929	23.0758	24.8402	25.5566	26.1733	27.1237	28.2948	29.0702	29.4961	30.8178	30.9443	31.733	32.7671	33.3629	33.3269	34.5077	34.3126	34.9113	35.9557	35.9291	36.92	37.1234	37.718	37.5335
	24.7936	24.9639	25.3486	24.6738	24.1298	24.6744	23.7999	23.7993	23.9311	23.5549	23.3574	23.1326	23.0936	23.0738	22.2381	22.7112	22.4165	22.4201	23.354	24.7469	24.5186	25.2687	26.3098	28.3567	29.3714	30.3682	31.4816	33.3014	34.2263	35.2209	36.8114	37.4127	38.5484	39.7963	41.7062	41.9345	43.51	44.5548	45.5341	46.1503	47.3316	48.1387	48.6524	49.7127	50.2594	51.2393	51.3748	52.1959	52.5226
	19.8995	20.6807	21.2731	21.3667	21.8311	21.8595	21.5934	21.6061	21.4002	20.9946	19.3284	18.7361	18.4472	18.7838	17.8255	18.1372	18.0217	18.6853	18.8225	19.471	20.5857	21.2767	23.0331	23.9248	25.5267	26.2211	27.5287	28.7769	29.9385	30.8625	31.7417	32.5356	34.0136	34.3645	35.8188	37.2288	37.928	38.6342	39.3858	39.8688	41.1009	41.525	42.2213	43.4083	43.1666	44.272	45.3139	46.317	46.1464
	15.1649	16.1247	17.1182	16.7069	17.0653	17.2846	16.959	16.62	16.5697	15.5253	13.26	13.0353	13.0931	12.1054	12.0167	11.9531	12.243	12.4053	12.5033	13.2449	13.6733	14.2057	14.9542	16.1056	17.3892	18.472	20.0468	22.0607	22.3302	23.8357	24.4327	26.0924	27.4354	27.8356	29.894	30.363	31.2037	31.6341	32.4045	33.3665	34.1259	34.7403	35.3012	36.1427	36.5609	37.3211	38.0823	38.5396	38.6853
	27.2463	27.2662	28.0775	27.7103	27.267	27.2535	27.7248	27.8501	27.2753	26.4325	24.6995	23.9536	24.1202	23.634	23.534	23.8774	23.868	24.1432	24.1977	25.2288	26.0574	27.0023	29.2568	31.0981	34.2575	37.532	40.3178	43.5783	46.7852	49.9401	53.4124	56.049	60.0385	62.8952	65.816	68.7132	71.8467	74.9616	76.1214	79.4921	82.9328	85.2632	88.3727	90.2603	93.326	94.946	97.4313	99.6259	101.229
	17.7272	17.9218	18.7061	18.1338	19.0967	19.5381	18.8261	18.761	19.3989	18.8978	18.1617	19.0248	19.3782	19.2864	19.1124	19.0988	18.6228	18.767	18.8672	19.4577	20.4741	21.2722	22.7471	25.1375	28.3316	31.7238	34.797	38.7074	42.5854	46.0707	50.8221	54.6956	60.289	65.4689	70.0718	75.5684	79.3654	83.2919	86.9373	91.5294	95.4957	97.9538	101.376	103.972	106.48	109.44	111.151	113.426	115.252
	11.1695	10.7977	11.7711	11.9871	12.4899	12.3136	12.5626	11.8091	12.5764	12.2413	11.4502	11.3646	11.9536	11.5312	11.2236	11.7665	11.4813	11.4954	12.0287	12.8816	13.7507	14.7976	16.8965	18.5124	21.0978	24.3153	27.4444	30.8897	32.9275	36.0779	38.3251	40.57	43.931	46.335	49.8612	52.6022	55.3264	58.5261	60.7956	63.2358	66.6185	68.8037	71.1688	73.475	75.8777	77.368	79.318	80.7982	81.9488
	21.3275	21.2367	22.088	20.8439	21.3194	21.3769	21.6837	21.5886	21.6784	21.7583	21.808	21.5317	21.9314	21.5866	21.8762	21.6352	22.0824	22.3395	22.7559	22.9201	23.9449	25.1144	26.0318	27.0635	29.7429	29.9703	30.7325	32.8337	34.3994	35.8109	37.5101	38.4911	40.4327	40.5946	42.8811	43.5402	45.5786	46.2076	46.9954	48.1243	49.5685	50.0164	51.3117	52.5262	53.9511	54.071	54.6379	55.1872	55.6273
	14.768	14.6529	16.1	15.5753	15.8781	15.7473	15.6067	16.215	16.0566	14.6286	13.5761	12.7816	13.3264	12.9223	12.0472	12.6526	12.1658	13.1252	13.1662	13.9037	15.0063	16.3607	17.8983	20.7692	23.0255	25.4573	28.1699	30.5614	33.1846	36.2539	38.4705	40.6513	42.5184	44.5477	45.8414	48.169	49.9545	51.7949	54.1811	55.7738	57.4422	59.2459	60.6123	62.8333	64.031	64.9698	65.0979	65.8252	65.7806
	14.9615	15.2022	15.0631	15.2636	15.4353	16.241	16.5994	17.0413	16.9096	17.2593	19.2985	20.2574	20.6288	19.8695	19.8801	19.9492	21.3755	22.5525	22.3646	23.2466	25.574	27.663	29.6385	31.0207	33.3167	36.6557	37.9815	41.537	42.3138	45.5394	47.4302	49.1196	51.4995	52.7173	55.6918	58.11	59.6126	61.7848	62.4117	66.1995	68.946	70.0863	73.2359	74.7516	75.8645	78.964	80.5286	81.1062	83.2752
	18.2543	18.6281	19.4696	19.4828	19.9619	19.8932	18.9808	18.8553	19.1711	18.7084	17.7333	17.441	17.849	17.3051	16.749	16.5911	16.6098	17.2217	18.118	19.2242	21.3117	21.8684	24.8466	26.972	29.0688	32.5394	34.7238	36.8085	39.4548	41.8796	43.4219	45.4585	47.0665	49.3511	50.7135	52.7587	54.7734	56.0231	57.2573	59.5174	60.4351	61.9304	62.8413	64.7762	65.2925	66.5385	67.5073	68.2624	68.9292
	14.1599	14.891	16.2617	16.2094	16.7126	17.0108	16.9996	17.6283	17.7345	16.7705	16.8133	16.1165	16.599	17.4623	17.5068	17.6682	17.3421	17.2472	17.657	18.1977	19.1927	19.375	21.4283	23.1358	25.267	27.3285	29.1064	32.2876	34.2636	36.8172	38.8801	41.0519	43.6934	45.4755	48.4173	50.3167	53.4262	55.2562	57.3744	60.0613	61.5078	62.8829	63.8002	65.6165	67.3844	68.5569	70.3331	70.8716	72.0304
	15.3566	15.8043	16.6613	16.5871	17.6973	18.1485	17.4223	17.3536	17.7019	17.7789	17.1159	16.8704	16.5262	16.1451	16.6315	16.5882	15.8591	17.2167	17.6812	19.1229	20.2053	22.6754	25.4844	27.7846	31.1028	34.1537	36.7768	39.6272	42.7608	45.1331	49.049	50.4872	53.6733	57.0249	60.2396	62.4843	64.2444	67.6647	69.71	71.9498	75.2066	77.2136	77.8471	79.3989	81.5294	82.764	84.686	85.5172	86.7356
	40.368	41.506	42.2466	41.2377	43.0369	42.2648	42.2558	42.2127	42.3072	42.4368	54.835	52.6912	50.5477	51.0234	50.3198	49.7318	48.4586	48.4784	48.7	48.2338	49.0662	48.7297	50.7996	53.2782	55.3509	57.3186	61.8895	65.1122	68.5879	72.9028	75.8722	81.4576	86.0762	89.0495	93.0764	97.0719	100.147	103.151	106.748	109.736	112.715	117.013	120.386	121.84	125.397	127.864	129.752	132.37	133.757
	15.783	16.1963	17.0141	16.1625	16.0319	15.4108	14.8443	14.8018	15.5377	14.6146	17.6931	16.5741	16.7664	17.0456	16.5195	16.4191	16.1673	16.3522	16.4688	16.9689	18.3089	19.8488	21.445	23.9568	26.5787	29.3237	30.9732	34.294	37.1816	40.2947	42.8878	45.7451	48.6723	51.0773	54.2682	57.0433	58.742	61.3543	63.7928	65.628	67.8795	69.9494	71.4211	73.2516	74.9157	75.5003	77.1553	78.4584	79.2842
	20.5655	20.5649	21.2148	21.1091	21.6115	21.36	21.2213	21.2099	21.6419	22.2949	19.3503	19.14	19.2012	18.6115	18.0308	19.1538	19.0838	20.2113	20.3425	22.4125	23.5307	25.2281	26.3639	28.2957	30.5137	33.4459	36.6617	41.168	44.128	49.1424	53.6081	57.8212	62.7567	66.414	71.7871	75.8528	80.5684	83.5165	87.3442	91.8443	94.6675	97.6215	100.021	104.062	105.724	108.754	111.021	114.837	115.52
	10.725	10.6783	11.3312	11.3018	11.321	11.9089	12.6575	11.904	11.8245	11.3051	12.9865	13.3527	13.2651	13.6516	13.6115	14.4521	14.4616	15.7545	16.1613	18.2067	20.0741	21.1838	22.1472	24.0223	25.3893	27.4687	30.5154	35.7675	38.7645	43.1353	45.3314	48.8309	52.6876	56.8955	62.2809	67.3372	71.7768	76.5716	77.059	79.0242	83.04	85.1383	89.7262	91.4789	93.1752	93.7668	95.472	95.7704	95.5875
	12.885	12.6809	12.8971	12.755	12.5065	12.2217	12.513	12.7307	13.2839	13.6048	18.2109	19.8168	25.3294	27.8633	28.5565	28.4096	29.185	31.4589	30.821	30.6735	29.5122	29.0037	29.6456	30.7408	32.4364	33.4272	33.9858	36.2581	38.8517	43.4134	46.3645	50.0849	54.1834	56.7467	60.7922	64.9277	67.9959	70.6213	75.3179	76.9333	81.7688	85.578	88.3496	89.8778	92.7694	93.3859	95.1767	97.5076	100.283
	15.9984	15.9733	15.7682	15.9137	15.7152	15.9509	17.3058	17.8757	17.5408	17.0121	20.1437	20.7632	22.5676	22.2383	21.7112	22.4133	21.5466	22.3429	22.445	22.2789	23.9315	24.3856	25.8178	27.6434	29.4467	31.23	32.8922	35.5371	38.1082	40.4906	42.6768	45.8004	50.0831	53.2336	55.758	59.6464	61.9256	64.0683	67.2555	69.6162	72.1589	75.2141	77.4326	79.5011	80.9432	83.4785	84.431	85.9659	88.1943
	27.3008	27.4948	28.3488	27.0377	27.4793	26.9675	26.8235	25.9247	25.4866	24.2989	30.8125	34.8846	35.2557	34.9247	32.0457	31.7465	31.3522	29.5859	28.6732	28.6327	28.2677	27.7437	29.1192	29.1179	31.886	32.7184	33.1023	34.8717	36.4765	39.6349	41.3673	43.3568	45.7931	47.6902	51.8241	55.024	56.503	59.9729	61.8466	66.2384	69.2142	71.4913	75.0356	76.6527	78.4579	81.273	82.5803	83.1277	84.9644
	16.5867	17.5659	18.0173	16.8179	17.735	17.2557	16.6666	16.2741	16.576	16.2005	17.4554	16.605	16.8004	15.9976	15.3086	15.937	16.1874	15.6112	15.9358	16.9877	18.0383	17.8974	19.3601	20.4471	22.129	24.0882	26.5628	29.7854	32.6087	35.7007	39.6226	43.2696	47.7411	51.9334	55.8517	60.3658	64.7933	68.3794	72.2451	74.9676	78.269	81.1451	82.9936	85.8894	87.6401	90.3969	91.865	94.6745	96.2095
	18.4071	17.9757	18.568	18.1516	18.7152	18.6108	18.2562	18.3574	19.0231	19.9458	21.3623	21.4262	22.7646	22.6274	22.595	22.9287	22.5213	23.0601	23.1861	23.6303	24.3615	26.2414	27.1728	28.9809	31.8812	33.7149	37.159	40.8204	44.0799	47.0146	50.262	54.0352	57.2159	61.0958	64.8796	67.6523	70.9266	73.4633	76.4448	77.2658	80.2752	84.0259	85.8398	87.46	89.1622	89.609	91.5028	92.4295	93.1346
	22.77	22.4325	23.4869	23.7935	23.5258	23.7101	23.695	24.0349	23.9085	23.6542	24.3117	23.5512	24.2587	24.3057	23.8929	24.4446	24.676	25.4096	25.9847	26.6809	27.9862	29.0074	30.9374	32.951	35.9217	38.7112	41.2777	45.6564	49.1376	53.2473	57.6281	61.2322	65.9353	70.1943	74.3344	78.8606	83.629	86.5353	89.8047	93.0501	96.7256	99.6823	102.327	104.881	107.186	108.774	111.308	112.415	114.013
	18.7291	18.5266	19.0891	18.4241	18.3973	18.8728	18.3068	18.2421	19.2499	18.5506	23.3008	21.6475	20.6746	20.5225	20.1297	20.594	20.7723	21.3318	21.4655	21.6741	23.189	23.0173	24.8226	25.1865	27.5476	28.5363	29.6252	32.1479	33.5468	35.2211	37.5049	38.4069	40.4608	42.0767	43.7691	45.8798	47.0658	47.9481	49.6205	50.1908	52.3226	53.3266	54.9866	56.2398	55.8183	57.0432	57.0371	58.659	59.2002
	29.1553	28.9839	29.0075	28.3875	27.6477	27.1013	26.5518	26.0947	26.6767	26.6584	26.8105	26.9535	27.2702	26.9008	26.7425	27.332	27.3262	27.4553	27.5655	27.5603	28.2029	28.6571	29.6762	32.0083	34.3946	36.6222	38.6955	41.7358	43.8735	47.7019	50.7701	53.8609	57.1611	60.503	64.6066	67.7469	70.9885	73.8151	77.738	79.8845	83.7407	85.7454	90.1921	91.3833	94.0623	96.9552	99.1292	101.204	103.097
	13.6089	13.9876	14.4161	14.5294	14.5734	14.9007	14.9253	15.2067	16.2274	15.5721	15.1651	14.7773	15.1485	15.1363	13.8943	13.9067	13.9523	13.9706	14.41	15.1436	15.4839	16.2525	18.3288	20.0114	21.9566	24.4688	26.442	30.2217	32.539	36.3983	38.9586	42.473	44.9063	47.7523	51.152	54.6859	57.8094	60.6384	64.3855	67.0625	71.1722	74.2034	77.3322	79.9553	82.3393	85.8111	87.426	89.6623	91.9794
	19.3153	19.5038	20.237	19.5672	20.3606	21.2793	21.783	21.3804	21.4932	20.8007	19.9217	19.5599	19.8299	20.1066	19.5693	19.8054	20.1849	20.2795	20.4398	21.7726	22.5943	23.8641	25.6869	28.2017	30.723	33.2489	35.7308	39.3096	41.2361	45.4224	48.491	51.6038	55.0673	58.0966	61.0403	63.6199	66.7709	70.1046	72.0958	74.8439	78.6993	80.6665	83.658	87.0164	88.6555	90.5111	92.8735	94.5067	95.4304
	17.4445	17.9031	18.6258	18.2767	18.4875	18.2937	18.7922	18.0965	18.8202	17.87	17.5051	17.0861	17.4089	17.6061	17.7417	18.3408	18.2612	18.7305	19.3819	20.5148	21.4191	23.1578	25.1492	27.5303	30.3173	32.8173	35.6336	38.6386	40.9942	44.1892	47.2997	50.9928	54.8065	57.8439	61.3702	64.8155	67.7182	70.749	74.0594	76.6617	79.9333	82.2091	85.3821	88.0597	89.8511	91.9868	93.6946	95.7986	97.3327
	17.0534	16.5883	16.6903	15.4411	16.172	16.645	16.5711	16.921	16.754	16.4809	14.6449	13.1044	12.1523	10.5523	9.3064	8.75099	8.18382	8.73181	8.03913	8.25818	8.8492	8.75104	9.93077	10.3101	11.3558	12.0975	13.3588	15.5997	16.9711	19.0787	21.0516	22.9998	25.4253	29.4351	33.2288	37.3018	39.5548	43.9583	46.9077	49.5076	52.9371	55.3759	58.4293	59.6086	60.5292	61.0769	62.4472	64.2838	64.1849
	25.7898	25.5774	26.2832	25.819	25.9338	25.9226	25.9245	25.6251	26.3511	26.6173	28.7869	28.6237	29.2246	30.1752	29.4965	31.4476	31.0813	32.7751	32.8707	32.6867	32.9422	33.2185	34.3501	36.0723	38.5472	40.4805	42.7039	44.997	47.7099	50.3881	53.6649	58.0013	62.3152	65.0186	69.4095	73.2918	75.3395	78.2683	82.5408	85.4588	88.1847	91.4552	95.0532	97.2471	98.6462	101.658	103.598	105.437	106.468
	13.8969	14.3952	14.9674	15.1778	15.4201	15.0478	14.678	15.7522	16.2495	16.4139	15.5787	14.8385	15.1607	15.8166	14.8045	15.2522	15.0698	15.8289	15.4017	15.4685	17.2889	17.7206	18.53	19.782	21.4473	23.9424	26.5355	29.9976	33.025	36.8663	41.0144	44.1037	48.7108	52.9372	58.1155	61.4885	64.5904	67.5083	69.7584	72.8623	76.7592	81.1483	82.947	86.3026	88.7683	92.0162	93.8394	96.597	98.5684
	13.6769	13.2591	14.2918	13.2771	13.4324	13.6334	12.8711	12.7636	12.6434	12.3709	11.6713	11.2958	12.0171	11.6248	11.6927	12.4567	12.624	13.6909	13.7288	14.8422	16.0999	16.3987	17.8563	18.8757	21.191	22.9779	25.4985	28.0819	30.4734	33.7595	36.1442	39.2314	41.8957	44.5803	47.6082	50.4072	52.7349	55.3189	57.5441	60.1191	62.4907	64.0081	66.3817	67.453	69.3441	71.1203	72.5186	73.9403	74.8959
	19.8255	19.977	19.6877	20.2826	19.6697	19.9009	18.6866	18.8809	19.4337	19.4019	19.5503	19.0824	19.5844	19.415	19.6722	20.1843	20.4516	24.2878	26.2272	27.2166	26.9299	25.9054	26.7909	26.9001	27.9077	29.3695	29.9738	31.9111	33.7536	35.9152	38.1221	41.1339	43.4363	46.4206	49.18	53.0046	55.6241	58.9251	62.5008	66.2247	69.1112	73.1744	74.9642	77.928	80.1733	82.7026	84.597	87.3812	88.6671
	19.1542	18.817	18.6459	18.622	17.6233	17.766	16.8523	16.2611	16.6579	15.7346	15.0784	13.4085	14.2128	14.709	13.6372	13.1636	13.8298	13.9998	15.3561	16.2637	18.3295	19.0763	21.1282	23.6413	25.6105	29.0663	31.708	36.7456	40.1363	44.2935	48.2088	52.5199	56.2222	60.4784	65.079	70.0216	74.8498	77.9319	81.8035	85.578	91.1135	92.9648	96.8707	100.128	102.374	104.632	107.089	110.038	109.891
	24.6646	24.9283	26.7728	27.5585	28.8331	29.2915	28.1889	26.5857	26.0305	24.2689	22.01	22.0946	22.9543	22.6304	22.6651	22.7754	22.3254	22.8139	23.0515	23.42	24.4102	24.7918	26.1466	27.5849	29.6844	31.4019	34.052	37.4411	40.7943	45.2236	48.4421	52.988	57.6473	62.3352	66.9704	71.5784	76.0733	79.9685	84.0028	88.7388	91.9878	95.6948	98.6688	101.939	104.467	108.317	111.152	113.456	114.688
	12.8367	13.7672	14.6266	15.0429	15.788	15.8062	15.1861	14.8411	14.3922	14.0201	12.9658	12.7865	12.3865	12.2061	11.5616	12.0111	12.0088	12.0007	12.3856	12.9585	14.0363	14.5302	16.4888	18.4637	19.8178	22.208	24.875	27.4906	29.046	32.2348	34.264	36.7994	39.9434	42.0281	44.6855	47.0142	48.8358	50.9838	52.006	54.4861	56.6891	57.7441	60.0651	61.5445	62.4424	64.9262	66.5085	67.9025	68.2545
	28.9178	22.1971	22.8772	22.4673	21.9771	23.0595	22.6736	22.2936	23.0881	22.9562	23.5646	23.4865	23.6232	23.892	24.7297	25.4579	24.9947	26.3755	27.9257	29.6468	31.291	33.5398	35.7526	37.8082	39.1183	41.8737	41.9044	42.8977	44.8031	44.8182	45.4194	47.4179	48.2077	48.9939	49.6266	49.7945	50.6548	50.2027	50.664	50.9767	50.9442	51.3955	50.733	51.4131	50.4604	50.3461	51.2012	50.4605	49.7405
	18.2973	11.6818	11.6027	11.7542	11.2837	11.4706	11.4742	12.251	11.4211	11.8604	12.2086	12.6404	12.2062	12.2653	12.7369	12.9784	13.4504	14.2982	15.3155	16.5839	17.7457	19.8004	21.2934	22.6508	24.1696	26.6214	27.6881	28.2194	29.9217	30.9916	32.1939	33.7497	34.5771	35.8712	36.2018	36.8084	38.1149	37.4529	38.2044	38.4688	38.9291	38.6693	38.6861	38.7787	38.6802	38.6405	39.2255	38.2776	38.5092
	19.653	12.813	12.8281	12.7055	12.6798	13.1152	12.9385	12.6536	12.8988	12.8539	13.2768	13.1859	12.7125	13.4923	14.1993	14.5493	14.3556	15.0877	16.2237	17.6703	19.0703	20.7228	22.3781	23.7362	25.64	27.9331	28.3692	29.1692	31.3248	32.951	33.7599	34.6154	35.6834	36.5687	37.6384	37.896	39.4078	38.5117	39.0553	39.7005	39.4974	39.9497	39.0994	39.5829	39.9905	39.1985	38.9073	38.5963	38.5957
	40.6072	34.2615	34.4454	34.2924	35.1762	35.9099	36.2354	35.8612	35.9371	37.7023	39.9739	40.4677	41.5183	41.7039	42.1796	44.5113	45.5105	47.5158	49.4562	54.329	56.7915	59.3892	63.2473	64.4103	67.6844	70.38	72.7213	72.3434	73.9516	74.2579	74.6854	76.5642	77.0578	76.0109	75.2086	74.4225	72.7271	72.8997	71.373	70.2798	70.7235	69.103	68.1939	68.2662	67.8153	67.8525	66.9448	65.6738	65.0159
	21.8105	16.0327	15.9014	16.3148	15.5398	16.6561	16.4167	16.9302	17.18	17.7934	17.1915	17.5386	17.393	17.4178	18.3918	18.0824	17.4267	18.9758	20.221	21.4551	22.5911	24.5382	26.4604	26.8863	29.2283	30.8975	31.8354	32.1454	34.3103	34.4694	35.2843	37.2935	38.3777	38.3895	38.2468	38.5039	39.6249	38.4349	38.5005	38.3511	38.8637	38.8188	37.9107	38.5531	37.6419	37.9235	38.5408	37.5559	37.3165
	19.2647	12.9398	11.9204	12.0363	12.2398	12.2013	12.1058	12.593	12.9571	12.8037	13.1247	12.7376	12.8534	11.6188	13.4466	13.394	13.1192	14.0926	14.6326	15.4636	16.6387	17.3482	18.737	19.3819	20.7186	22.7301	23.2234	23.8207	26.1545	26.6476	27.2035	28.9137	30.0567	30.7842	32.754	33.1351	34.2555	34.893	35.3333	36.0108	36.912	36.2155	35.3901	36.7611	36.4099	36.2106	36.8986	35.5394	35.681
	18.2253	12.5612	13.0621	12.4016	12.3906	12.3355	13.0837	12.8211	13.0715	13.0107	12.451	12.3446	13.6165	13.0725	13.2396	12.7938	13.2107	14.2862	15.0971	15.7556	16.5659	18.2133	19.3361	19.6243	22.3099	23.6973	24.2574	24.2157	27.231	26.5871	27.9	29.4478	30.5232	31.546	32.1222	33.0023	33.8668	33.6016	33.4612	34.1181	35.2473	35.4683	35.864	35.3743	35.9672	35.8331	35.9531	35.9772	36.1263
	34.2083	26.7225	26.9797	27.3489	26.8841	28.0224	26.4988	27.5431	27.1219	27.0273	27.7742	27.5399	27.8543	27.4573	28.2864	29.0261	29.4786	30.4776	31.1217	33.769	35.3742	36.7034	39.7814	40.8288	43.3857	46.1941	47.2862	47.6923	49.5089	51.6962	52.0483	54.3066	55.4278	56.1089	56.4731	58.1847	59.3775	58.2369	58.2413	59.358	59.2722	59.8084	58.5463	58.692	58.7677	58.6029	60.0565	58.6615	59.2613
	22.5352	15.8909	16.5462	15.8928	16.0851	16.3794	16.316	15.8536	16.3308	16.6716	16.7788	17.0114	17.197	17.0065	17.6366	18.0808	18.2257	19.3058	20.414	22.142	22.7016	24.1149	24.7656	26.688	28.6111	30.4075	30.9509	31.2896	32.9661	33.7509	35.1562	36.2557	37.188	37.8204	38.4507	39.3879	39.9581	39.7385	40.6506	40.3674	40.8566	41.234	41.3626	41.4093	41.0484	41.7319	42.0226	41.559	41.9403
	25.7495	18.4392	18.2125	17.8704	17.3299	17.3704	17.3165	17.6745	17.4156	18.7703	18.3776	18.6588	18.0655	18.4018	18.6192	19.4449	20.0081	20.7985	21.386	22.983	24.8965	24.9754	26.2217	27.9398	30.5345	31.7255	33.8875	35.0176	36.4728	37.6247	39.2043	40.2791	42.509	43.3976	44.2784	44.3787	45.0729	45.4206	45.5872	45.2724	45.9937	46.4315	45.4746	45.9339	45.7437	45.0713	46.434	45.6906	45.434
	13.7276	6.59354	6.99915	7.95688	6.75608	7.34375	6.18764	6.5967	7.15655	7.17035	8.13568	7.68833	7.78944	7.67717	8.41334	8.59752	8.28417	9.1023	10.0831	10.7319	12.0148	12.3961	14.0142	14.6672	15.7561	17.151	17.9112	18.2704	20.1479	20.5954	21.5428	22.3951	22.9073	23.6519	23.3046	23.5232	24.8352	24.8452	24.6031	25.2161	25.3324	25.613	25.4837	24.1826	25.418	24.8136	24.7224	25.5479	24.5486
	14.8681	8.14117	7.7951	7.45116	7.39658	8.50899	7.72911	8.0339	7.54755	7.56583	7.28929	7.74302	7.21662	7.06309	8.22293	8.46356	8.626	9.00991	9.18228	10.7839	11.741	12.2323	14.4872	15.7177	16.6078	19.1453	19.7818	20.9191	22.0816	22.7574	23.8349	25.5604	25.7646	26.0718	26.6479	27.1217	27.6524	27.119	27.3422	27.0382	27.1118	27.2062	26.7447	26.7253	26.2593	25.6418	25.5691	24.6934	25.6035
	27.2248	20.5338	20.7131	20.2029	19.9956	19.9377	19.8852	19.7058	19.1427	19.7412	19.4187	19.6637	19.8723	18.924	19.8395	20.1824	20.1713	20.9393	22.5042	23.5719	24.5506	25.8702	27.1929	27.9785	29.7785	31.3835	32.0924	32.1418	33.5365	34.6217	35.0906	37.137	37.9201	38.9247	38.8738	39.2421	40.0504	40.3651	40.5403	40.8351	40.4351	41.7208	41.0688	40.9945	41.2927	41.2435	42.1045	40.8369	41.8641
	21.3321	14.402	14.6801	14.7841	14.2383	14.7357	14.3309	14.5531	15.0209	15.0505	15.1941	15.2192	15.708	15.9459	15.4056	16.9225	16.8816	17.6734	18.68	21.2917	22.3262	23.5486	25.1748	26.6765	28.0531	29.0449	30.2494	30.9552	32.2872	33.0762	33.2077	34.4819	36.2391	36.387	37.1482	37.2025	37.5469	38.0448	38.4129	38.6297	39.2045	38.9668	39.1831	38.9017	39.4742	38.8796	39.6973	38.48	38.641
	18.0981	10.8969	11.6367	11.5739	11.647	11.4376	11.656	11.4224	11.4599	11.592	12.1351	11.932	12.2255	12.3273	12.8739	13.4899	13.7629	14.6703	15.3312	17.4355	18.1704	19.1739	20.3371	21.1603	22.4095	23.9743	24.8099	25.0118	26.8054	27.5958	28.7791	29.2664	30.1457	31.6639	31.7378	32.5119	34.136	33.9424	33.7988	34.7892	34.6563	35.1038	35.2817	35.9061	36.4156	35.3761	36.5101	36.4818	36.3218
	25.147	18.0532	18.1578	18.5924	18.8065	18.4975	18.7329	18.4226	18.2617	18.7017	19.5159	18.6556	19.4648	19.3892	19.1561	19.7636	20.6373	21.2838	22.3321	24.1696	25.0229	26.3262	27.9296	29.4626	31.0383	32.6846	33.7087	34.7679	35.8175	37.0117	37.126	38.1923	39.8146	40.1869	41.5366	41.1737	42.6938	43.0279	43.3072	44.1466	44.0688	44.4492	45.1151	44.1408	44.5042	44.6607	45.3209	44.3835	44.7984
	25.9971	19.0486	19.1732	18.7373	18.6421	18.5691	19.4668	19.2037	18.7549	18.0528	19.0047	19.5946	18.232	19.5199	19.3633	19.9515	20.5461	21.4783	23.1895	24.7113	25.8414	26.9673	29.0032	30.1575	31.9769	34.156	35.1758	35.2377	38.1254	39.3263	40.1982	41.0169	42.8173	43.0823	43.6482	44.4678	44.8546	44.8311	45.5617	45.3956	45.9096	45.2033	45.6791	45.7401	45.8139	45.4932	46.7107	45.5693	45.1314
	60.9511	51.3552	48.9735	47.5699	45.9249	44.8219	43.6673	42.4586	41.6457	40.4683	37.0934	36.6589	36.856	34.8764	35.293	35.1323	35.4848	35.3246	35.6152	35.0844	35.2135	37.223	37.3348	37.7845	38.7524	40.4251	39.7572	39.59	41.8869	42.1973	43.3715	44.6552	44.3565	45.9678	45.8563	46.1838	46.4413	45.6214	47.1562	46.3419	45.9583	47.4758	45.8837	46.6837	45.1016	46.0569	46.6122	44.9746	45.2166
	35.2893	26.9616	25.9034	25.7103	24.5265	24.0636	24.2035	23.2294	22.1674	21.9056	20.1176	20.0257	20.1265	19.9579	19.9756	19.83	20.0097	20.7546	21.6196	22.3596	23.8918	25.1325	26.6847	27.2355	28.6789	30.6437	31.1728	31.9052	33.607	34.5602	34.9141	36.3721	37.4141	38.0399	38.854	38.9886	39.7687	39.4244	39.1185	40.0714	39.7004	39.7735	40.1723	39.249	39.6219	39.0297	39.542	39.0459	38.6854
	21.9123	15.9383	16.7333	16.1157	15.9995	16.1232	15.8739	15.9874	15.8709	16.0477	16.1639	16.3703	16.4731	16.2054	17.5624	17.3754	17.6234	18.1907	19.2705	20.7523	21.7202	23.3413	24.5367	25.9794	26.662	29.621	30.1724	31.3897	32.3757	33.4038	34.5823	35.4742	36.5277	37.5002	38.0078	37.3832	39.4504	39.6695	40.2418	40.0251	40.3466	40.4045	41.1754	40.5935	40.7227	40.5527	40.7929	40.8243	40.6132
	29.6718	22.8083	23.9407	23.6157	22.9903	23.2193	24.066	23.2353	22.9895	23.7681	24.727	24.1525	24.1868	23.186	24.6259	25.3857	25.0583	26.8862	28.031	29.4529	31.9312	34.2159	35.2724	37.7228	40.2875	42.2308	43.6611	44.3418	46.6689	47.4941	48.7641	49.6255	51.7232	51.8869	52.3246	53.5233	54.5867	54.1922	54.5228	54.4917	54.221	55.0831	54.5276	54.3933	54.5305	53.7106	54.9716	53.5733	52.6388
	22.4704	16.6085	17.292	17.1586	16.4188	15.6594	16.3777	16.7535	17.0335	16.9015	17.0419	17.4568	17.4746	16.7149	18.0563	18.1342	17.9012	19.3031	20.221	21.9102	22.4575	23.8188	25.4202	27.3594	28.3916	30.2992	31.8254	32.2601	34.1385	34.8752	36.0342	38.2543	38.6178	40.2603	40.428	41.4401	41.8504	42.3591	42.9544	43.7068	43.5031	43.1398	43.7584	43.4197	43.4417	43.1902	44.0254	43.4515	43.3846
	22.0182	16.1924	15.5751	15.8337	15.4649	16.2555	15.8752	16.4046	16.318	15.8587	16.0766	16.158	16.9548	15.5603	16.553	17.1538	17.2585	18.3801	20.2998	21.395	22.8396	24.478	25.6521	27.5482	29.2534	31.115	32.3258	33.4495	35.1401	36.5817	37.6944	39.0767	39.611	40.3351	41.5185	42.151	43.1972	42.3681	42.9277	42.6394	42.9995	43.1364	43.2619	43.5151	42.6527	42.4095	42.1056	42.2977	42.0642
	19.0757	12.2024	12.9483	12.9186	13.1845	12.8522	12.4772	13.3022	12.9906	13.0213	12.8924	13.0521	12.8997	12.8694	13.6112	13.9325	14.69	14.4139	15.714	16.9646	18.896	20.1965	21.6946	23.0993	24.7292	27.1099	28.3003	28.7269	30.5849	31.9392	32.2071	34.4633	35.1846	36.7029	37.3754	37.9811	39.2326	40.5581	40.0209	40.1998	41.7915	41.6431	41.8939	41.9938	41.0181	40.6379	40.7501	41.3104	41.1458
	23.858	17.4765	17.1233	17.4606	17.4528	18.2536	17.9766	17.6504	17.4935	18.0851	17.9917	17.7875	18.1368	17.8195	18.4606	19.3991	19.2426	20.0874	21.3419	22.9716	25.2752	26.845	28.2381	29.5228	31.934	33.4082	34.3053	35.5566	36.889	37.8873	39.0752	39.8591	41.8997	42.4629	42.7858	43.3194	44.3634	44.4786	44.2841	45.828	45.2552	45.4622	45.6407	45.8152	45.7199	45.3945	45.1773	45.4889	45.4182
	26.6349	20.8531	20.382	21.0715	20.5511	21.7451	21.044	21.3341	21.5054	21.0723	21.2019	21.7492	21.8472	21.4659	21.9655	22.1348	22.8704	23.287	23.7609	24.4445	26.556	27.3446	29.6176	30.2008	32.5112	33.9222	35.3183	36.2765	38.032	39.1436	39.9069	42.0238	43.1552	43.5012	44.1774	44.6538	45.6717	46.3306	45.9126	46.4873	46.045	46.6543	46.4223	45.632	46.3464	46.0739	47.3106	46.253	45.4578
	12.9067	8.32267	8.08706	7.91464	7.76777	8.15041	7.86894	8.02956	8.13403	8.58287	8.82971	9.42248	9.52491	9.19957	9.55167	10.0007	10.6235	11.4133	12.6008	14.2899	16.5918	19	21.3098	24.1294	27.4816	30.9585	33.7728	36.0305	39.9078	42.0361	44.628	47.4411	50.3536	52.8944	54.8694	56.6	59.0548	60.1694	61.8343	63.004	64.8427	65.8069	66.6194	67.723	67.8642	68.2879	69.4545	69.019	68.7166
	22.1257	16.3366	15.9564	15.9471	16.0126	16.0454	17.2589	15.8958	16.1472	16.8088	16.1622	16.2979	16.0781	15.5574	17.0282	17.5133	17.3164	18.3206	18.976	19.2408	21.2507	22.6334	23.9175	25.6927	26.6759	29.8835	29.9049	31.8434	33.4374	34.1523	35.0154	37.0485	37.5249	39.5675	40.4671	40.622	42.1403	41.9744	42.2587	43.3562	42.7853	43.4209	42.9564	43.8846	43.9896	44.0913	44.5048	42.8376	43.356
	28.1954	21.6324	22.4038	22.0512	22.0421	23.0966	22.9281	22.3904	22.5294	22.3503	22.8333	22.6209	23.0506	22.169	24.0533	24.4209	25.0797	25.8611	26.8558	27.9467	29.5424	30.5322	32.9928	34.864	36.8722	38.8588	40.7365	42.0863	43.9546	44.6981	46.1851	47.4153	49.7249	50.2877	51.2264	50.901	52.7123	52.4411	52.5399	52.7953	52.9855	52.7492	52.4828	52.938	52.0636	51.6568	51.5867	51.4467	51.3832
	16.09	9.33281	10.0525	9.87083	9.6158	10.7075	10.074	10.0098	10.3692	10.2125	10.0936	10.1933	10.5279	10.0774	10.6601	10.8607	11.3117	11.9716	13.0961	15.0243	15.5726	16.9645	18.4739	19.3198	20.8552	23.0695	22.988	24.2502	25.4359	26.2184	26.7605	27.9867	29.2773	29.3759	29.8422	29.9099	31.137	30.5773	30.7606	30.8955	31.2258	30.8357	30.527	30.4282	30.3685	29.8178	30.5295	29.4867	29.0937
	36.2304	29.292	29.4258	29.6838	28.542	29.9058	29.1652	28.9103	28.5205	29.3372	29.1554	29.6874	29.6637	28.9496	30.1411	30.9871	31.8467	32.2014	33.4531	35.1191	37.172	38.3405	39.9554	41.7774	43.6237	46.6333	47.0173	48.4457	50.8771	52.2071	52.8721	55.6685	56.7951	58.0094	59.4082	59.8537	61.0602	60.6945	61.5562	62.7101	62.9903	63.5281	63.9868	64.0502	64.1042	64.2442	64.7463	64.4782	64.1915
	27.2011	19.9919	20.2898	20.2634	19.6441	20.3119	20.1468	20.2125	20.4771	21.2883	20.4853	20.3754	19.6678	20.0667	20.5676	20.3233	21.6194	22.0915	23.3571	24.9577	25.9462	27.0995	28.2624	29.4799	31.202	32.6265	33.4793	33.6719	35.1959	35.7664	36.3792	37.5364	38.6079	39.1514	39.7254	39.8127	40.3972	40.3434	40.6463	40.3924	40.7215	41.6589	41.1652	41.0664	41.0311	40.7605	41.3925	41.3895	41.7209
	26.9352	20.1622	20.852	20.4428	20.7448	21.1455	21.266	20.9277	20.8549	21.6726	21.7634	21.544	21.8533	21.9222	23.1054	23.3165	24.1042	25.8176	27.1588	28.4568	30.5261	32.2482	34.1191	36.0399	37.5494	38.4761	39.3508	40.6435	40.4683	40.4361	41.831	42.5019	43.5028	44.6592	44.8589	44.8466	45.2714	45.67	46.1528	45.4732	45.4177	46.7019	45.6186	45.7501	45.9845	45.163	46.7131	45.8696	45.8482
	32.9317	26.2661	26.7791	26.6654	25.8745	26.6408	26.7791	27.2143	26.3733	26.7444	27.1263	26.8128	27.5605	26.9443	27.7558	27.9621	29.0144	29.9471	30.5092	32.1006	34.4279	35.5623	37.6113	38.8569	40.934	43.3047	44.4918	45.5519	46.8844	48.0049	49.5544	50.7479	52.3086	52.8366	54.0153	54.2723	55.3725	55.4193	56.8769	57.7653	57.0883	57.7204	57.6612	57.1696	57.7308	57.649	58.7095	57.7894	58.2963
	25.3254	20.1642	19.5297	20.5809	20.1904	20.7673	19.6875	20.2471	19.247	19.104	20.0332	19.5747	19.9034	19.5175	20.2325	20.6416	21.2496	22.4846	24.0874	25.5597	27.5817	29.2149	30.8398	32.8352	34.2298	36.2734	36.8145	37.6849	39.5995	41.1334	40.2917	42.679	43.3938	45.11	44.7198	45.4748	46.8308	46.4758	47.2251	47.7176	48.1071	48.1611	48.2218	48.885	47.9287	48.6558	48.1612	47.5457	47.8789
	22.9414	17.4361	17.167	17.7683	16.7752	17.6349	17.635	18.0182	18.0528	17.7817	17.7565	17.4668	17.5277	18.8666	18.6223	19.4134	19.0957	20.7883	22.0199	23.4106	24.562	26.8346	29.1852	29.4517	31.3998	33.2124	34.8174	35.8449	37.1126	37.6555	38.1981	40.4285	41.6425	42.4264	42.5942	42.813	44.1222	44.3695	44.3491	43.902	44.6168	45.2533	44.6754	45.3371	44.4284	44.4157	44.802	44.2555	43.8232
	49.0022	41.7531	40.721	40.6305	40.6366	42.5952	40.8703	39.9864	39.4953	38.0942	31.454	30.8201	29.6446	28.9665	30.2776	31.0655	31.6515	34.3373	37.6443	41.299	45.2934	48.6419	52.3555	57.5224	59.5831	63.1614	65.868	67.6555	70.244	71.3315	72.6976	75.8975	77.1553	78.5563	78.8902	78.8838	79.0724	80.2808	79.7192	81.9885	83.7336	83.3214	83.7035	82.681	81.6128	79.9486	78.181	77.2921	75.3084
	22.4189	16.5012	16.7923	17.4773	16.7152	17.4864	17.1755	17.6476	17.3635	16.8847	16.6669	16.5084	17.4856	16.3727	17.1869	16.8913	17.0081	18.0203	18.5805	20.105	20.6755	22.119	22.6405	24.4374	25.4108	27.6174	27.9139	28.781	30.4363	31.322	32.3809	33.6199	34.8959	35.7681	35.9944	36.8779	37.3291	37.6491	38.2209	38.4886	38.8148	39.4073	38.8263	39.2674	38.7327	39.2598	39.4891	39.3396	39.3889
	31.85	26.0303	26.2974	26.6107	25.7218	27.3699	26.3641	25.9413	26.1586	25.9773	25.5027	25.7347	26.0896	25.6395	27.1638	26.9426	27.4345	28.8102	28.8741	30.7089	33.0768	34.3117	35.891	36.8599	38.6267	41.0414	42.0877	43.1727	44.5936	45.4858	46.5309	48.5306	49.4504	50.378	51.277	52.0634	53.612	53.0709	53.1012	53.7716	54.7516	54.6945	53.772	55.418	54.5399	54.6509	56.3965	55.4542	56.01
	29.8806	22.838	23.1696	21.751	22.6382	23.2412	22.5442	21.9781	22.1366	21.6444	21.7155	21.9092	21.7272	21.4713	21.7652	22.5142	22.6782	23.8808	24.6511	26.3317	27.3825	29.0502	30.5133	31.0907	33.4481	35.0959	36.2585	37.5399	39.1833	40.5495	41.7966	42.5258	44.6209	45.0984	46.0736	46.7534	47.6134	47.6079	48.1082	48.763	49.4212	49.4314	49.1015	50.0056	49.7948	48.7908	50.8665	49.3635	49.3034
	23.2845	17.0761	17.1276	17.2291	17.4176	17.9335	17.4273	17.4538	17.4343	17.8446	17.3585	17.9782	17.2808	17.121	18.4102	18.3931	19.5647	20.1187	21.2379	23.3584	25.1548	27.0472	27.9495	29.6829	32.1945	33.901	34.3159	35.0462	36.5775	37.7744	38.6863	38.7399	39.7764	41.1139	41.1135	40.8955	43.0236	42.7798	42.2491	42.2907	41.6263	41.4487	42.3835	42.079	42.4285	41.0662	41.6752	40.4913	41.0241
	23.9676	17.5222	18.3974	17.7038	18.024	18.0247	17.9667	17.5245	17.6499	18.1457	17.8092	17.8364	17.6717	17.6939	17.7127	18.6298	18.0668	19.3087	19.654	20.7355	22.3389	24.0288	25.1798	26.331	27.9474	30.511	30.7167	31.7286	33.5205	33.8345	34.3344	35.845	36.9975	37.009	37.9075	38.2899	39.4995	39.2705	39.7929	39.6327	39.6496	39.9413	40.6844	40.5467	40.0421	39.9576	40.0898	40.037	40.032
	33.5255	25.587	24.2728	23.891	22.5186	22.4987	21.2041	20.8371	20.1039	19.4633	16.7787	16.7071	16.2998	15.1871	16.1323	16.0134	15.1804	15.953	16.911	17.3141	18.2327	19.12	20.461	20.5527	21.2586	22.2677	22.4134	22.4638	24.2085	24.7447	24.5677	25.8996	25.7874	26.4972	25.8194	26.1836	26.942	27.1902	26.688	26.8925	26.9133	27.011	27.4042	26.8488	27.6099	26.8866	26.8982	26.5209	27.1661
	29.0903	23.116	23.6592	23.4727	23.8672	24.3037	24.1715	24.235	24.3026	24.3321	23.6311	24.1629	24.32	23.3349	24.994	24.5748	25.4004	25.5579	26.5374	28.0691	29.8269	30.6896	32.3667	33.5783	34.625	36.2075	37.0556	38.0497	38.4758	38.9824	39.8824	41.2669	41.9614	41.9169	42.6402	43.0244	43.9419	43.7642	44.3216	44.6539	44.1933	45.4176	44.8628	44.4042	44.9973	44.8073	45.0027	44.9785	45.2396
	9.63281	4.69038	5.41841	4.71293	5.1721	5.5423	5.41268	5.18397	5.80096	5.54629	4.68246	5.00121	5.05673	5.71111	6.24973	7.11903	7.68519	9.20521	11.0695	13.7089	16.758	19.0667	21.5736	24.9337	27.2305	27.9611	30.7571	32.3016	34.0233	35.6038	36.5221	38.3295	40.0156	41.1815	40.7708	41.9697	42.9451	42.64	43.5027	43.2302	42.9897	43.7992	43.1992	43.069	42.8603	42.5537	41.5671	42.0246	40.3634
	24.8201	17.5932	17.8385	16.8436	16.5575	16.5494	15.9526	16.183	15.5459	16.0318	15.7523	16.3859	15.673	16.1333	15.8344	16.5496	16.6293	17.6984	17.5621	18.1091	18.4758	18.2768	18.9174	19.6174	20.6448	20.9446	21.0497	20.4091	21.2316	21.4121	21.734	22.6564	22.523	22.8504	23.0154	23.0662	23.2427	23.0173	23.6959	23.8086	22.9681	22.9718	23.2662	22.9609	23.2685	22.9278	22.8277	22.737	22.6547
	16.0908	10.7411	11.2667	10.8657	10.4984	11.3248	10.4041	10.9861	10.2848	11.0581	9.93736	10.3624	10.7742	10.4916	11.2757	10.7685	11.5259	12.3446	12.996	14.062	14.5233	15.9585	16.9496	17.4925	18.6656	19.3649	20.3478	20.2712	20.9518	21.2348	21.4852	22.5069	23.7419	24.1063	24.0664	24.3902	25.3677	25.2256	25.4031	25.9055	25.6274	26.1932	25.4456	25.7768	26.3274	25.5967	26.6713	26.6309	26.4344
	18.117	12.4745	12.1995	12.6197	12.1164	12.3586	11.566	12.2963	11.6106	11.7149	11.6239	11.8648	11.2754	11.5991	11.692	12.0709	12.2876	13.4178	14.3041	15.1073	16.9215	17.7857	18.5108	18.9492	21.0554	22.5256	23.4072	23.1669	24.3224	24.8011	25.5984	26.3691	26.8405	28.1796	27.7295	28.9831	29.5041	29.1043	29.8435	30.3498	30.1544	31.1562	30.9124	30.9721	31.2063	31.3855	32.345	31.4978	31.4859
	15.3139	9.66525	9.8416	10.0168	8.89387	10.3516	9.59142	9.83683	10.2219	9.3939	9.7578	9.4158	9.09533	10.1002	10.7416	11.6658	10.6792	11.436	12.1342	13.1222	14.5306	16.5071	16.8053	17.8202	18.8638	20.5473	20.0113	20.2152	22.0909	22.8256	23.5908	23.8427	24.3363	25.0472	25.708	27.0103	27.0292	25.6493	27.365	26.6528	27.0349	26.8192	27.1951	27.2435	26.3409	26.9095	27.3594	26.5073	27.969
	17.6079	12.1239	12.143	11.6349	12.3869	11.9345	11.5046	11.9478	11.2284	12.2312	11.2087	11.3119	10.7844	10.1677	10.744	11.1376	11.4064	12.4682	12.7295	14.1564	15.8116	17.446	17.4866	19.3909	20.0803	23.0326	23.7385	23.846	25.8187	26.5437	27.4705	29.1239	28.5897	30.2484	30.0527	31.2738	31.1489	31.8832	31.4004	32.9076	31.6107	32.7824	31.2406	31.4121	32.5138	31.3776	33.0306	31.0042	31.6152
	25.4831	19.6475	19.6018	19.44	18.2487	18.7475	19.0582	19.8548	18.141	20.0138	20.7685	19.9076	19.8682	20.5817	20.8623	20.683	21.791	23.5463	23.4672	26.7138	28.7183	28.6568	29.2667	32.3172	32.8856	35.4193	35.8758	36.8534	37.4496	39.1745	39.5802	41.3059	41.9309	42.5907	42.4179	42.4832	43.9568	43.3985	43.9802	44.4055	44.8742	43.232	45.0057	45.0971	44.8136	43.7621	44.6411	46.2575	43.9214
	25.9494	18.5831	19.276	19.3181	18.8078	18.6981	19.0882	19.5222	19.1097	19.0141	19.5154	19.5201	19.7184	20.0411	20.5922	20.152	20.9605	22.0635	23.0601	24.4932	26.0709	27.0342	28.1497	29.6351	30.4549	32.4302	32.5304	33.9353	35.3606	35.0315	36.3738	37.2885	38.3017	39.0102	39.3634	39.9533	41.4639	40.1568	41.9976	41.7884	41.9955	41.4225	41.9414	41.9857	42.6621	42.2041	42.801	42.4771	42.5697
	16.1481	8.08502	8.26868	8.35391	7.12372	7.34918	6.61659	6.73541	6.43173	6.52812	6.20217	5.8503	6.07772	5.95525	6.46969	5.90774	6.97092	7.20576	8.39085	9.36585	9.78294	10.9593	11.6256	12.7878	13.6771	14.0257	14.6381	15.0641	15.8197	16.4151	16.0682	17.1385	17.4363	16.9681	17.4717	18.2352	18.6062	17.8608	19.2031	19.1538	19.2808	19.2701	18.1172	18.8002	18.9337	18.7472	19.1548	18.988	19.4059
	22.3267	15.4433	15.5838	15.3645	15.4483	16.1532	16.1399	15.9378	16.3645	16.7528	16.4276	17.19	17.0478	16.5507	17.0953	18.3663	18.3255	18.8193	20.2806	22.4011	22.9506	24.523	24.4934	26.3579	27.686	29.0864	29.3479	29.4257	30.5135	31.2965	31.6601	32.4535	33.6734	34.3663	35.218	34.8815	35.6315	35.7556	36.2243	35.8208	36.381	36.8276	36.2867	36.3822	35.7498	36.1579	36.7436	36.8426	36.6999
	34.3295	25.9985	26.7409	26.5136	26.3435	26.6104	26.3739	26.8375	26.1424	27.0369	26.8032	27.188	27.0671	26.6509	26.8816	27.3081	28.3436	28.7214	29.1959	30.6169	32.4873	34.1757	35.5839	36.7496	38.5269	39.7377	40.561	40.9696	42.3548	43.0245	44.2008	45.1406	45.9798	46.3336	46.8301	47.2881	47.7532	48.077	47.012	48.1198	47.8478	49.3817	48.6504	49.2073	49.1635	49.3389	49.9421	49.6903	49.8435
	30.6349	23.8465	24.5421	24.1156	24.2443	23.9388	24.6024	24.3147	24.1236	24.2775	23.823	23.7322	23.7333	23.5828	23.664	24.4674	24.6664	25.4668	26.4921	27.337	29.2321	30.2787	32.5046	33.9348	35.3163	36.9907	38.7094	38.4049	40.407	40.89	41.0478	43.1629	44.4013	44.9111	46.4053	46.8781	48.0809	47.8324	48.3275	48.6653	48.5646	49.4122	49.1136	50.0654	49.4676	49.0987	49.8367	49.7825	50.4376
	28.0238	21.9105	22.5485	22.0797	21.5287	22.2221	21.4071	21.6207	20.963	21.5329	21.4164	21.1697	21.414	21.0826	22.1673	22.6823	22.9475	23.556	25.1709	26.3018	27.787	28.6427	28.955	30.4994	31.5226	33.2039	33.9359	33.8462	34.925	34.9803	36.2597	36.9686	37.5127	37.9359	38.7153	38.5786	39.3231	38.7754	39.2569	39.2221	39.7117	39.7513	39.3901	39.6999	39.1579	39.6213	39.7921	39.1207	39.3569
	26.7844	20.1122	20.992	20.5557	19.7551	20.0602	19.598	19.6469	19.2974	19.3754	18.6156	18.5597	18.7269	18.4679	18.5177	19.3487	19.5584	19.9922	21.0826	22.806	23.7133	25.0803	26.1163	27.9758	28.7691	30.527	31.2985	31.6034	33.0483	33.6098	33.4196	34.8801	35.6801	36.4139	35.9798	36.8237	37.692	37.5738	37.0784	37.6476	37.3074	37.6044	37.3015	37.6968	37.6103	36.7917	37.1708	37.1258	36.2764
	43.0535	36.8671	35.1205	34.3425	32.7936	33.3417	31.9772	32.2632	31.7095	32.4294	29.7015	29.6493	28.7362	28.7766	29.3646	28.7443	29.8646	30.7936	31.5892	33.3145	34.0547	35.0535	36.5318	37.5271	39.7477	40.1815	42.1198	42.2946	43.5631	45.0769	44.8875	46.5201	47.8128	48.3995	48.7357	49.2109	50.4605	49.6693	50.6647	50.8535	51.7006	50.7304	51.1992	50.633	50.6995	50.1331	51.0651	50.6506	50.5751
	111.986	97.4883	92.9852	88.7421	84.5591	80.9935	77.2112	73.5293	72.0063	68.3091	59.0301	57.2291	55.834	54.2838	52.9442	52.5883	51.8289	51.1135	51.1779	52.2468	51.6973	51.9149	52.644	54.2697	54.8138	55.9375	56.0228	56.9932	57.3969	57.3343	57.9421	58.7459	58.536	58.9613	59.1111	58.1598	58.9756	57.5715	58.1385	57.6628	57.3226	56.5524	56.1795	56.1564	55.108	53.4457	53.0054	51.7692	51.103
	22.6214	15.8903	16.5946	15.5095	15.1899	15.8954	15.3073	14.7159	15.1287	15.3482	14.5288	14.059	14.7196	14.7044	14.158	14.7306	14.8802	15.5213	16.4474	17.1669	19.682	20.0954	20.6264	22.4832	23.9073	25.5871	26.795	26.9798	29.2862	29.6054	31.0681	32.0041	32.8272	33.8579	34.6361	35.72	37.351	37.1576	37.2707	37.9578	38.0047	38.926	38.954	39.3508	39.6525	39.3841	40.455	39.4096	39.3484
	25.3315	19.0076	19.1333	18.7934	18.976	18.7226	19.0863	18.76	18.713	18.3719	17.4561	17.7741	18.0603	18.3539	18.4276	19.3651	19.26	20.044	20.7353	22.2709	22.4966	25.2088	25.8293	27.029	28.291	29.5561	30.1036	30.5051	31.7054	32.005	33.3929	33.725	35.0813	35.0374	36.0984	35.5172	37.2973	36.8198	36.291	36.4646	37.4978	36.9195	37.0048	38.0106	37.614	37.5706	38.0493	37.9065	37.692
	39.9197	33.4367	34.5011	34.4158	34.0824	33.6731	34.3903	34.3399	33.959	34.149	33.0054	34.2118	34.94	34.7618	35.6491	36.4912	37.5397	38.7527	41.2388	43.447	45.9729	48.3947	52.1976	52.5084	55.9449	59.513	59.9654	61.1546	62.1191	63.672	66.0119	67.9212	68.1022	66.8023	68.2081	68.9096	69.1579	68.4544	70.4904	69.2368	69.2631	68.3212	68.3533	67.3261	67.2477	66.4434	66.9335	65.7374	66.4179
	29.5785	23.5362	24.2304	24.1752	23.6646	23.4523	23.6617	24.3707	23.6922	24.4332	24.0285	24.2353	24.1063	23.8842	24.8585	26.0409	26.3593	27.0197	28.3353	30.3593	32.5189	33.6887	36.2647	37.4835	40.3927	42.6526	43.282	43.6249	46.0191	46.3465	48.6714	51.09	53.0554	53.6598	54.9727	54.7659	56.5057	55.0225	55.4334	56.1912	57.1053	56.132	56.1487	56.3421	56.7073	55.799	56.8924	56.9958	56.0327
	38.9579	31.7167	31.7893	31.8942	31.0529	32.3274	31.9337	31.2151	31.4205	31.5493	31.0196	30.7895	31.8652	30.3776	31.5214	31.5378	32.9647	33.1718	35.0639	36.305	37.2005	38.2034	40.4062	41.079	42.7259	45.0499	45.7257	47.1485	48.3349	49.9407	49.518	51.8296	53.5058	54.902	54.8855	55.1307	56.3506	57.0266	57.2271	57.5906	57.9515	59.0739	58.4346	58.0631	58.4241	58.8345	58.2714	58.4254	58.6182
	26.1132	19.38	19.98	19.5619	20.3218	20.1151	19.7851	20.0221	20.0232	20.371	19.7132	19.8812	20.5158	20.1064	20.8211	21.703	21.6889	22.8979	23.4334	24.9696	25.8268	26.9842	28.4165	29.5084	30.4078	32.9539	32.3059	32.9664	34.3924	35.1398	35.5364	36.161	37.0891	38.0458	38.9496	37.8861	39.9071	39.1781	39.4359	39.6187	39.8361	40.3874	39.5668	40.4222	40.859	40.2256	41.25	40.3775	40.5272
	35.5894	30.3361	30.2541	29.6034	30.4747	30.1199	29.2756	30.6619	29.4477	29.5446	29.5306	29.9579	30.4081	28.6134	31.1455	31.3483	31.1392	32.854	33.9592	35.8867	36.8922	40.25	40.7533	41.0711	44.2003	45.6643	47.7493	47.6072	48.6502	49.7008	49.4168	51.4647	51.5666	52.3815	52.2982	52.3784	53.8055	51.4989	53.7975	53.6546	53.7952	54.198	53.3749	54.2596	53.4782	53.3611	53.435	52.9843	53.2181
	29.6338	21.9283	22.1237	22.1022	21.4388	21.8287	22.2907	21.1891	21.3221	21.513	21.6989	22.0197	20.8917	20.708	21.4078	21.9104	21.2122	21.972	23.4355	24.9763	26.7368	27.139	27.5138	28.8197	31.1019	33.0022	33.6359	33.0603	35.2352	36.198	36.4296	37.7915	38.4908	39.872	40.0093	40.8703	40.7	42.0337	42.4132	41.4587	41.7241	42.0301	42.6759	41.6963	42.598	42.684	42.5681	42.696	42.6204
	18.7679	12.1983	12.9738	12.4476	12.0872	12.7286	12.3168	13.2171	12.5057	12.5718	13.4052	13.598	13.5618	13.5744	13.8969	14.5372	14.6509	16.0618	17.4403	19.5488	22.381	25.7084	30.2023	34.1335	37.179	40.6029	42.9277	45.1891	48.0762	50.8158	51.9189	53.94	56.0674	56.8446	58.4708	59.15	59.8535	59.6984	59.9615	59.8898	59.7961	60.2734	59.3657	58.9272	58.191	57.4197	56.8532	56.0496	55.3566
	23.8078	17.4775	17.7595	17.3965	17.3091	17.3399	17.5081	17.0307	17.0549	16.9839	16.2376	16.8424	16.632	16.2716	16.6484	17.9407	17.1752	18.9227	19.8154	21.4687	22.6829	24.1388	25.7138	27.2027	29.2751	30.0278	31.716	32.2575	33.1763	34.189	34.3367	36.794	36.8873	37.5478	38.5306	38.389	38.9127	39.076	39.2543	40.1773	40.2253	40.2898	40.3287	40.3405	40.3259	38.6305	39.8671	39.6404	38.8815
	17.8977	10.9619	11.4676	11.169	10.4728	11.2103	11.0727	11.1246	10.3945	10.8109	10.9628	11.2617	10.9725	10.6399	11.0272	12.6348	11.8193	12.8947	13.8022	15.4392	16.8912	18.3411	20.11	22.2456	23.5297	24.9931	26.147	27.3945	28.7143	28.5518	30.7633	31.1929	33.9227	34.4718	34.6449	35.3745	36.3259	36.4462	36.7304	37.3814	37.7883	37.7243	37.9327	38.4708	38.9954	38.2846	38.7564	37.4586	38.3238
	54.9365	46.1697	45.6081	45.235	43.4506	42.6195	42.4307	41.2995	40.3048	39.5128	36.0714	36.5805	36.2156	36.2397	36.3781	36.1201	35.736	36.0816	36.6378	38.596	38.6257	39.4202	40.8984	42.4169	42.6206	44.4036	45.1095	46.1347	47.0531	47.9911	49.1568	50.8051	51.5184	52.85	52.459	53.4794	54.7215	53.8638	54.6792	54.6216	54.8514	54.9993	54.7548	54.5528	54.3843	53.8491	54.3389	54.0225	53.4637
	11.1699	11.4568	11.178	10.3658	10.5922	10.4189	10.2516	10.1953	10.4842	10.1131	11.2063	13.0758	14.7042	17.5156	20.6229	23.3316	26.9741	28.9479	31.423	34.9025	37.6002	40.2501	43.9843	46.5836	49.411	52.2712	54.3995	57.8395	60.3521	63.9282	66.9226	68.8336	72.9688	75.1391	78.0413	80.7976	82.9545	85.4036	87.9942	90.5391	93.5762	95.1179	97.4044	99.814	101.351	103.444	105.377	107.846	110.667
	23.8519	25.5613	24.9919	25.1709	26.106	26.1731	26.725	26.5752	25.8526	26.4022	27.8167	29.2966	30.2609	34.7756	37.3956	41.7583	46.1368	48.4243	51.5091	56.9337	61.8174	64.2654	68.67	72.1406	74.1145	77.0911	79.5782	83.605	85.5235	87.8996	89.4651	91.4299	93.2177	94.4308	97.6635	98.1106	99.5291	99.465	101.332	100.435	102.023	102.726	102.926	104.016	104.104	104.434	104.666	103.497	103.973
	7.75828	8.42357	7.97518	7.4198	6.97547	6.95553	7.3492	7.92677	8.68419	8.78459	7.30977	8.58192	10.3022	13.1005	16.0514	18.6252	21.8255	23.992	27.0493	30.3245	33.6406	36.4628	39.9571	42.7612	45.8566	49.0583	51.4777	55.007	57.5116	60.306	63.4226	65.2691	68.2135	70.1636	72.4178	75.2217	77.6684	79.1352	81.4296	82.4854	84.7283	85.6003	86.8059	87.9524	88.2779	88.9133	90.0994	89.9761	90.9303
	58.1082	58.3502	58.1676	56.9745	56.6136	56.3814	56.2592	55.9854	55.5405	54.7956	47.688	48.7962	50.1504	53.2026	56.5112	58.763	62.6115	65.1716	67.447	70.7623	74.7007	77.2778	80.0055	82.4765	84.5738	87.1307	89.2175	91.9886	93.7516	96.3123	97.6988	99.1261	102.317	102.903	104.049	105.737	106.323	106.957	108.137	108.986	109.835	110.064	109.683	110.693	111.053	111.774	111.125	110.114	111.136
	15.4516	16.0971	16.3784	16.4259	16.8623	16.7123	17.3511	16.6941	17.051	17.0074	17.7902	19.6531	21.9525	25.5273	29.5656	33.9062	38.1497	42.5718	47.5428	52.9204	58.6453	63.1522	68.4456	73.256	77.8469	82.9802	87.1572	92.7721	97.651	103.436	109.295	114.26	119.991	124.75	130.618	136.318	141.597	146.851	152.996	159.586	165.698	169.229	173.726	179.577	182.067	185.937	188.077	188.175	190.178
	64.5805	64.3478	63.246	62.8478	62.878	62.5067	62.1165	61.3632	60.5314	60.7671	53.9496	55.0175	55.9691	58.9805	61.9607	64.9772	68.3479	70.6768	72.9196	75.37	79.0921	81.3858	83.9847	85.5776	87.4368	90.3511	92.256	93.6892	95.2391	97.0274	99.6052	99.6836	101.925	103.116	104.25	106.024	106.347	107.213	107.895	108.141	109.632	109.386	108.617	110.404	109.791	110.757	111.129	109.321	109.528
	12.954	13.8447	13.3913	13.1354	13.1674	13.0867	13.1137	12.6557	12.6653	12.6313	13.6232	15.1783	17.1692	20.8851	24.8733	28.2332	31.7712	35.7678	40.2529	44.5838	49.2647	53.4942	57.9798	61.1384	65.951	69.5763	73.83	78.7915	82.2926	85.8376	90.3042	93.8966	97.6354	102.241	105.662	109.233	113.1	115.639	119.563	121.39	125.181	126.732	128.717	131.123	132.533	133.689	134.949	135.957	137.441
	12.6457	11.8994	11.9278	10.8996	10.6942	10.949	11.2488	10.7689	11.2697	10.5829	11.8434	13.7378	15.8783	20.4852	23.4587	26.8434	29.254	33.2283	38.1261	41.5927	44.8999	48.0475	51.7185	54.6616	58.2328	60.5956	62.3596	65.9058	68.0254	70.0216	72.3086	73.3047	75.6608	77.948	78.9335	80.7604	82.4817	82.9352	85.3861	85.022	86.2713	86.6162	87.3193	86.9694	87.5069	87.9033	87.8069	87.9033	88.8627
	46.6096	46.8454	45.4286	45.3311	44.9047	44.7357	45.2704	44.8502	44.0515	43.6617	36.2572	37.5676	39.4881	42.7522	46.3054	50.0331	54.3548	56.7024	60.2656	63.7935	67.8047	71.8441	74.0804	75.8638	79.3635	81.1731	83.9054	85.8143	88.2305	90.3833	92.8522	94.136	95.6325	96.4114	97.9159	99.0598	99.571	100.834	102.729	102.082	102.776	103.018	102.381	101.66	101.969	102.477	102.058	101.541	101.582
	11.239	11.171	11.1838	10.9853	10.9735	10.3674	10.8206	10.0696	9.61959	9.106	10.1563	11.7111	13.2558	16.7147	20.7466	26.204	31.5447	37.2778	42.7914	48.3446	54.383	59.7073	66.2133	70.463	75.1779	80.3074	85.1841	90.116	93.9404	98.8763	102.487	104.556	108.884	110.928	114.556	117.106	119.063	120.39	122.898	123.814	125.233	126.595	127.561	128.392	129.27	130.435	129.482	129.899	131.098
	9.37391	9.30733	9.26548	8.53371	9.20093	8.50853	8.26241	8.36177	7.40341	7.48554	8.12569	9.71779	11.4005	14.2926	16.9959	19.8953	22.8057	25.8694	29.4115	33.3088	37.0567	41.2542	45.7002	48.6528	52.5801	55.7597	59.4996	64.1289	67.3154	70.8961	74.9022	78.1989	81.9781	85.2075	88.8242	92.3187	94.4285	96.082	99.9769	101.859	104.16	107.066	108.056	109.331	111.122	113.417	114.461	114.592	116.749
	19.772	19.8015	18.5391	17.6753	18.0271	16.7788	16.4593	16.1277	16.6165	16.0442	17.3648	18.5362	19.826	22.2056	24.7669	27.5165	30.2774	32.9782	36.3113	39.3702	42.868	46.2521	49.3157	52.2715	55.1295	58.5691	60.9052	63.9938	66.7634	69.6967	72.7264	74.9569	78.5076	80.8936	83.5889	86.314	89.3794	91.9408	94.7919	96.6152	100.503	102.146	103.975	106.429	107.64	110.275	111.236	112.774	115.517
	5.35517	5.3109	4.97447	4.25019	5.01749	4.63775	4.02486	4.21977	4.18483	3.63366	4.51625	5.28466	7.29336	9.70343	11.8015	14.6903	17.4641	19.7265	23.7154	26.4083	30.1461	33.9746	37.1545	41.2424	43.5784	47.8544	50.7895	54.5559	57.7616	61.8541	64.4545	67.7551	71.0242	72.6935	75.8303	79.2199	82.388	84.1918	86.2795	88.467	91.6318	93.7021	95.6157	97.3161	96.8846	100.178	101.541	101.943	103.655
	18.0259	17.8877	17.1262	17.386	16.8441	16.1927	15.5952	15.7655	15.6312	15.8618	15.8342	17.6235	18.8429	21.4528	24.1271	27.5096	30.838	33.8054	38.5911	42.8651	48.6945	53.1304	57.4556	60.9677	65.0446	69.2189	72.6014	76.2064	78.825	82.8123	86.954	90.0082	93.9647	96.1054	97.8297	101.591	103.472	105.83	108.248	109.444	112.173	113.349	114.237	116.329	116.958	118.587	118.83	119.902	121.199
	14.5218	13.7134	13.3805	12.0007	11.7377	10.6253	10.9602	10.1424	10.0459	9.77304	10.0535	11.7659	12.2523	15.1355	17.8103	20.2721	23.3971	25.6161	28.791	31.3786	34.1202	37.3488	40.4167	43.1731	46.1963	48.8355	52.3437	55.0143	57.3308	60.3833	62.5625	64.848	69.0916	70.4098	72.6439	75.0498	76.119	77.9936	80.7247	81.6895	84.015	85.2906	85.7626	87.904	89.2742	88.9863	90.8541	91.3417	93.9065
	15.8059	16.1512	15.6139	14.9426	14.6481	14.1464	13.2087	12.8062	12.6362	12.1451	10.9294	11.9909	13.3557	16.4435	19.1751	21.9714	25.4085	27.7846	30.9425	34.6798	38.573	42.0382	45.0158	47.5381	50.888	54.1571	56.976	60.523	61.9863	65.282	67.7102	69.79	72.6043	74.5394	76.7458	79.0654	80.8008	82.1973	83.6421	85.9574	87.2106	88.5881	89.4844	92.09	93.0967	94.1789	95.8152	96.3856	98.2626
	14.0968	14.821	15.3142	15.9198	16.1644	16.3557	16.2677	15.9486	15.7272	15.8732	16.9696	18.5178	20.5185	23.5145	26.2667	28.7437	31.9821	34.6262	37.3536	40.5718	43.5422	46.7162	50.2042	52.8602	55.806	58.4008	60.3395	63.2537	65.0959	66.7333	69.4749	71.6311	73.7791	75.6882	77.6678	79.3458	80.9781	82.7376	84.037	84.9479	86.8813	87.9701	89.6164	91.5675	92.9277	95.003	95.8345	96.2461	97.2544
	22.4917	23.03	23.1755	22.29	22.7748	21.8438	21.6818	21.8079	21.2792	20.7084	18.7818	19.8043	21.0751	22.7241	23.5831	25.264	26.9669	28.1977	29.5515	31.653	33.7791	35.2748	36.9638	37.8687	39.114	40.8043	41.4516	42.8699	43.0883	44.5033	45.1817	46.3734	47.2275	47.059	48.3005	49.145	50.1704	49.9003	50.8535	50.498	51.7905	51.5666	51.6627	51.7284	52.077	52.565	52.2268	52.1839	52.2706
	17.1372	18.9856	19.2235	19.7109	20.7059	19.9527	19.922	19.8051	20.4102	20.3301	22.3744	23.409	25.9489	28.4524	32.2195	35.48	39.2577	42.7951	47.2147	50.9025	56.2947	60.4397	64.9823	68.042	72.1762	75.6036	79.5491	83.9134	87.1887	90.2162	93.6739	96.3421	99.6255	101.555	105.789	107.163	109.704	112.098	114.114	115.873	118.718	120.26	121.717	126.2	126.316	129.059	130.393	130.519	132.531
	9.7443	11.0018	11.0374	11.0379	11.1933	10.9166	10.837	10.9414	11.6193	11.3306	12.602	13.7688	16.5428	19.4615	23.082	25.4341	28.8992	31.9225	35.0606	39.0221	42.6569	46.8026	51.0492	54.3267	57.8975	61.451	64.1664	67.7423	70.2745	73.9207	77.5428	80.254	83.0864	85.3098	88.1089	92.0509	93.8287	95.7474	97.1578	98.4605	99.9336	101.388	102.215	104.938	105.436	107.183	107.061	107.63	107.97
	6.88328	6.29744	6.48079	5.61383	6.04093	5.641	5.88383	5.75122	6.13141	5.42917	4.45925	6.30271	7.45674	10.411	12.5237	14.491	17.1352	18.9499	21.2852	23.8256	26.2446	29.4661	31.4577	34.1452	36.5289	38.9131	40.1555	43.3012	45.2714	47.1968	50.0968	52.1402	54.654	56.5922	58.4149	60.042	61.0522	62.721	64.7218	65.41	66.687	67.9779	68.3706	69.94	69.9484	71.4486	71.7834	71.7248	72.5059
	21.4151	21.8763	21.9819	21.7496	21.9693	21.1263	21.4032	20.986	21.142	20.619	18.6564	19.6563	20.8971	23.1558	25.6764	28.3035	31.6632	34.214	37.4022	40.4535	43.0203	46.3111	49.0543	51.2488	53.9796	56.6141	58.7014	62.0259	63.7257	65.8044	68.341	70.2751	72.6389	74.3229	76.5193	78.4738	80.0226	81.0182	82.6104	83.4921	85.1174	85.7234	86.2781	87.0301	87.9023	88.298	88.7459	88.1204	89.2853
	14.1488	14.198	13.6043	13.4914	13.6003	13.359	13.2422	12.7555	12.6442	12.4713	13.5736	15.0798	17.636	20.6932	23.5754	26.8084	30.1506	33.077	36.5411	39.4849	43.2678	46.9773	49.9894	52.7741	56.3877	59.5496	61.8001	65.5594	67.9596	70.4494	73.7002	76.5414	80.4057	81.7535	84.2181	87.3968	89.3216	91.7677	94.0256	96.0117	98.7245	99.6828	101.478	103.117	104.318	106.165	107.293	107.961	109.226
	39.0888	39.9471	39.4919	38.5359	38.4801	38.0953	37.7534	37.8297	37.5833	37.0709	33.0112	34.1175	35.86	37.4139	39.7048	42.5726	44.4953	46.3477	49.738	52.8842	55.3715	57.0172	60.147	62.3034	64.9472	66.2598	68.094	70.3217	71.1656	73.5931	75.2342	77.1188	79.3809	80.7738	81.972	82.6634	84.1046	84.5303	85.5935	85.7677	86.6491	86.6589	86.8059	86.9993	87.2194	86.9023	86.9659	85.6376	85.1213
	11.4286	11.511	11.6218	10.7469	10.5127	10.3879	10.2647	10.309	10.5502	10.7608	11.3342	12.5506	14.1635	16.3368	18.2701	20.4773	24.4392	28.1804	32.632	36.748	42.3549	48.0595	53.1714	57.032	62.351	69.3745	73.4594	78.5504	82.4436	86.4239	90.6671	94.4029	98.3508	101.744	104.553	107.796	110.56	112.978	116.219	117.816	120.856	122.669	122.361	125.635	126.742	128.422	129.755	129.893	130.508
	17.8709	17.6219	17.6231	17.0258	17.3108	17.1545	17.2075	16.8662	17.6344	17.5864	15.606	16.1604	18.2413	20.7883	23.0483	26.2874	29.5432	32.0521	36.5981	41.6896	46.5042	51.1237	55.2984	58.7105	63.2485	66.6526	70.2223	75.0792	78.6816	83.2388	86.6421	89.5062	93.4943	96.5614	99.4913	103.895	105.973	108.847	111.041	113.362	116.164	116.357	117.305	118.801	119.741	120.178	120.933	121.352	121.661
	21.4027	21.3008	20.936	21.2151	20.8423	20.6872	21.0503	19.9626	19.6643	19.7702	18.6496	19.8088	21.8265	24.5356	28.3071	31.6159	36.4667	39.3107	43.5341	46.7425	52.3724	56.4189	60.0382	63.7069	67.0342	70.9093	74.9185	78.2472	81.8562	86.4452	89.5037	92.6525	95.8778	98.2366	100.442	103.331	105.384	107.467	110.39	112.224	113.311	113.805	114.906	115.2	115.093	115.599	116.218	115.876	117.155
	11.9343	12.1047	12.0653	11.7282	11.9965	11.2811	11.2489	11.2665	11.0878	11.422	11.4848	12.6784	13.7318	16.5347	18.6238	21.4156	24.2408	26.6681	29.9617	33.3953	36.2814	39.5811	42.3765	44.7183	47.6973	50.3247	53.2365	56.1746	58.576	61.0846	63.8637	66.2248	68.7158	70.1571	72.0872	74.6514	75.7228	77.0803	78.5539	79.8001	81.1204	81.8912	82.5326	83.2152	83.6478	84.3905	83.8865	83.8862	84.3113
	16.6287	17.2276	16.8094	16.808	15.8602	15.9258	15.8995	15.1673	15.158	15.1742	15.6475	17.3462	20.0302	23.1465	26.5652	29.6415	33.583	36.8866	40.4909	43.7874	47.5813	51.3315	55.8467	58.768	62.309	65.1838	68.6865	72.685	74.9095	78.493	81.7572	83.2579	86.9011	89.1874	91.5403	94.4785	96.2692	98.2167	99.5913	101.26	103.567	104.551	105.777	106.764	107.322	107.451	108.618	107.637	107.981
	-1.81829	-1.09979	-1.83393	-2.08768	-1.90778	-2.55169	-2.59893	-2.51648	-2.40333	-2.94862	-4.25143	-3.75483	-3.88353	-4.10111	-3.79462	-4.25057	-3.60885	-4.42214	-3.50037	-3.52586	-3.03614	-2.6046	-2.0347	-2.09116	-2.02406	-1.72192	-1.65786	-1.23485	-1.27886	-1.05808	-0.67381	-0.541869	-0.196956	-0.770006	-0.305274	0.461788	0.372756	0.15851	0.510074	0.5234	1.00191	0.374407	0.494679	0.495625	0.248975	0.450809	0.618255	0.541238	0.845942
	5.89432	6.27627	6.50457	5.83535	5.76208	5.55883	5.76043	6.39293	6.51868	6.08001	8.12089	8.19935	9.66259	11.6243	13.532	15.6954	17.5469	19.5413	21.3771	24.05	26.5108	29.1076	30.7138	32.7046	35.616	37.7223	39.1986	42.1838	44.0316	46.1807	48.6108	49.8359	51.9212	53.4856	55.6764	57.4087	58.7564	60.9446	62.7268	64.2666	66.3944	68.028	69.1796	71.8089	72.5803	74.9174	75.933	76.7745	77.9541
	23.0729	23.4964	23.7345	22.9268	23.2288	22.4677	22.5817	22.3289	22.1864	22.3374	20.7072	22.6016	23.12	25.3433	27.7895	30.7867	33.1689	36.0242	40.0097	44.1724	47.536	51.9039	56.0221	60.4413	65.4269	69.0104	72.5694	76.7295	79.6366	83.749	86.9333	90.0285	93.5401	96.7726	99.222	102.255	106.581	109.183	111.917	113.52	116.567	117.236	119.247	121.314	122.007	123.349	124.51	123.877	124.68
	12.1694	12.7797	12.6197	12.2201	12.6808	12.406	12.8736	12.9979	12.8372	12.4556	18.4777	20.6185	24.5236	29.4584	35.2796	40.0785	45.4242	49.9358	55.4169	61.1784	67.8116	74.0185	80.2238	85.4901	89.059	92.9663	96.0433	100.716	103.854	107.763	110.881	113.102	117.213	119.964	123.264	126.821	128.982	130.452	134.333	134.867	137.292	137.523	138.313	140.909	141.543	141.902	142.841	142.472	143.415
	9.73524	9.71523	9.19595	9.1746	9.10516	8.5951	8.63363	8.44576	9.00228	8.57008	9.88588	10.7951	12.8121	16.0024	18.886	22.3819	26.3622	29.6336	33.2231	37.2549	41.7706	46.1668	50.6374	54.5156	57.8738	62.3968	67.0796	72.3243	75.5407	80.91	84.3415	88.828	94.9143	97.5988	101.923	107.621	113.298	117.547	121.961	124.615	128.909	131.067	134.143	139.096	140.409	144.372	147.02	146.854	148.728
	8.32515	9.33277	8.72513	8.696	8.20316	8.17799	7.96997	8.49846	9.09911	8.79477	9.25965	10.7249	12.6128	16.754	20.5038	24.3274	28.9623	32.9681	36.8696	41.6245	46.1907	51.1453	55.751	59.2674	64.1367	68.0466	73.2131	77.9301	82.3237	87.4529	91.8681	95.7705	100.737	103.694	108.855	112.364	115.62	119.398	122.589	126.041	128.749	130.195	132.386	134.748	136.105	138.427	139.605	140.046	141.819
	11.2417	11.5353	9.84365	9.36605	9.11462	8.4417	8.24965	7.63874	7.54152	7.15772	6.33791	7.97323	9.96714	13.6956	17.7492	21.7076	25.6957	29.8145	34.6214	39.0797	43.5928	48.8119	53.2706	56.963	61.8114	65.5127	71.1119	75.0473	79.0863	84.4101	89.245	91.4543	95.0096	97.521	100.145	103.365	105.283	107.829	109.878	113.096	115.328	117.73	118.081	120.479	122.129	121.664	122.683	122.462	123.431
	23.3429	22.8688	22.3656	21.344	20.7279	20.4072	19.694	18.7599	18.7267	18.1073	16.0634	17.8453	19.6412	22.8429	26.1307	30.1878	33.4979	37.0339	40.0729	44.7165	48.8965	52.5245	56.6283	60.6524	64.2985	67.6792	71.0701	74.9068	78.8711	83.1146	87.808	90.7389	94.373	97.4796	100.979	103.598	106.402	109.426	112.505	114.315	118.466	119.779	121.561	125.045	125.496	127.455	129.317	129.272	132.229
	21.7975	22.2351	21.2362	20.7972	20.5522	20.0346	19.8846	19.0527	18.8357	18.5773	18.3391	20.4554	23.8323	27.2489	30.9362	34.2925	37.7281	40.4462	43.4098	47.0633	50.6131	54.1459	57.1121	59.4604	62.7751	65.3315	67.5073	70.9117	73.0418	76.5084	79.3522	81.526	84.7316	85.6457	88.7711	90.7303	93.4939	94.298	95.9333	97.5666	99.8003	100.543	101.047	102.097	102.888	104.546	105.295	105.392	106.214
	25.4231	24.5051	23.0327	21.7193	20.7704	19.1903	17.712	16.8739	16.198	15.0694	12.3664	13.4042	14.9224	16.9303	19.8287	22.2826	25.7872	28.8774	32.1144	36.0747	39.3212	43.3434	47.2535	50.708	53.8941	57.6274	61.0971	66.2166	70.5825	75.6343	80.1627	83.1576	87.9714	90.038	94.8336	97.8337	99.7071	101.742	104.947	106.568	109.321	110.732	112.464	115.04	116.63	118.413	119.302	120.36	121.706
	11.3993	11.1707	10.2759	10.2015	10.1562	10.3337	9.7555	9.61166	9.90843	9.32091	9.57545	10.8528	13.4571	16.5125	20.2627	23.3657	26.9392	29.6329	33.2713	36.8507	41.124	44.0776	48.5602	51.3647	54.9511	58.8857	61.5058	65.4559	68.2755	73.1285	76.2864	79.0704	82.7363	85.357	88.99	91.7621	94.5476	96.777	99.7053	101.529	105.108	106.098	108.011	110.691	111.711	114.416	116.475	117.024	118.847
	23.9858	23.3772	23.5181	22.9891	22.7468	21.8773	20.943	20.4447	19.5187	19.3622	20.2881	21.9792	25.2316	28.8025	31.9473	35.1488	38.7436	41.351	44.5955	47.798	50.5224	53.4893	56.4198	59.4461	63.1912	66.4022	69.2967	72.7307	75.4218	78.8361	82.2187	85.8246	88.6242	91.2233	93.9739	97.0005	99.4441	101.753	104.526	106.325	109.118	110.028	112.162	114.504	115.39	117.314	118.1	119.326	120.935
	12.3816	13.1098	12.5183	11.7687	11.6088	11.2905	11.1646	10.6889	10.9532	11.1868	11.386	12.9557	14.8971	17.1991	19.481	21.8064	24.355	26.2674	28.3172	30.5265	33.0265	35.5787	37.2796	39.2527	41.3629	42.876	44.8885	47.5243	49.4365	50.945	53.3857	55.0887	57.5891	59.0451	60.6055	62.2802	65.0343	66.2029	68.5204	69.9145	71.73	72.1204	74.0182	75.1119	76.309	77.841	79.8117	79.9923	81.5026
	15.303	15.5015	14.8642	15.1914	15.543	15.3851	14.742	14.8326	15.0393	14.5559	15.6152	16.9303	18.3315	20.307	23.7916	25.2788	27.1961	29.1185	31.8452	34.735	37.1741	40.2391	42.8605	45.3796	46.7708	50.0755	51.4048	54.3904	56.1036	58.2854	60.6605	62.2177	65.0601	66.4215	68.971	72.3958	73.38	75.1962	77.7609	78.9645	80.6827	81.9039	84.5799	86.6528	88.0943	88.6708	91.1252	91.9143	94.7496
	20.1372	20.2737	19.5146	18.8168	18.5675	17.6853	16.1155	14.7125	15.0404	14.4392	14.7545	15.6668	17.3979	20.9069	24.1708	27.541	31.0406	34.0512	37.067	41.2251	45.116	48.4647	51.806	54.2853	57.3765	62.077	64.9045	68.2231	70.9806	75.3657	78.1087	80.5249	83.9523	86.3249	88.9769	91.3027	93.6765	94.6783	96.5919	97.8485	100.169	100.723	100.59	102.711	102.614	103.76	104.823	104.894	106.397
	11.6457	11.9697	11.4686	10.8516	10.4912	10.2236	10.0051	9.46391	9.55473	9.33706	12.1286	13.3512	16.0302	19.2278	23.2139	26.1698	30.0908	33.7736	37.828	41.7982	46.2787	50.0404	54.1108	57.1147	61.6333	66.4121	70.569	75.1264	79.0512	82.939	87.4347	89.4751	93.6215	96.2576	99.6845	102.495	104.61	106.578	108.472	110.113	112.537	114.282	113.757	116.255	117.735	118.593	120.304	120.983	122.196
	8.14109	8.03312	7.41827	7.11928	6.86507	6.84894	6.98866	6.97667	6.86674	6.74443	7.24184	7.76106	9.16526	11.4186	13.5198	15.6991	17.7568	19.9634	22.2425	24.8038	27.1166	29.8267	32.3994	34.5318	36.8591	38.9751	41.4784	44.3895	46.475	49.3708	51.7207	54.3341	56.5497	58.4774	61.0775	63.7233	65.1853	67.2794	69.5229	70.8977	72.8556	74.4427	75.9222	77.1097	79.2476	80.5403	81.7406	83.3319	85.2184
	6.88246	7.09962	6.44564	6.11141	5.9272	5.23766	5.13949	4.51805	4.87115	4.48322	4.72486	6.00113	7.20326	9.96172	12.8925	15.0628	17.9585	20.4878	23.2573	26.5666	29.4677	32.4238	35.1083	37.8421	41.4092	44.5701	47.2764	50.5467	53.1511	56.3516	59.2442	61.7978	64.8744	67.3233	69.384	72.918	75.4492	77.5275	80.2127	82.3799	84.7912	86.1464	87.3782	89.8217	91.3295	93.0077	93.9378	94.4707	96.5696
	4.67669	4.99521	5.10247	3.98993	4.24533	4.65222	3.84838	3.88939	3.93486	3.71023	4.0284	5.06744	6.5833	9.22895	12.032	15.0825	18.09	20.6279	23.4644	27.398	30.2554	33.3615	37.1115	39.5977	43.1111	46.7486	49.3925	52.7464	55.2389	59.1729	62.3763	65.5707	68.2748	71.5278	73.445	76.7097	78.9887	81.8395	84.7819	86.7935	89.9879	90.991	93.1496	95.2609	96.3462	98.3786	99.5066	99.799	102.073
	54.7686	54.1921	53.0937	51.9822	51.1998	49.1698	50.1328	48.1167	47.3968	46.8814	40.1579	39.4737	41.3868	42.8465	45.0531	46.6796	48.9814	50.6588	52.2785	54.6789	56.8206	58.6766	61.0864	62.8562	64.6288	65.7883	67.0733	69.4989	69.7635	72.4125	74.0897	75.949	76.9719	77.6366	78.5356	79.8311	80.6061	81.2937	82.2823	82.6519	85.081	84.4827	84.9593	85.1718	85.414	86.0447	87.1802	85.8337	86.9839
	32.0351	31.7388	30.7675	30.0456	29.4734	28.467	28.2337	27.0331	26.2347	26.2363	21.1008	22.1837	23.7339	26.1124	29.0019	31.0404	34.1478	36.2224	38.8345	41.1535	43.8436	47.1243	48.92	51.2875	53.5574	55.1525	57.0914	59.7703	61.5066	63.4358	64.9367	66.5056	68.3619	69.6056	71.5063	72.1238	73.1804	74.5827	75.5548	76.2016	77.5917	76.7907	76.8895	78.3418	77.9037	78.2513	78.887	78.6636	79.1617
	20.7583	19.5738	17.9407	16.3194	14.0942	12.6837	11.4355	9.86391	8.78354	7.86708	2.7463	3.4302	4.58754	7.26031	10.0508	13.5857	17.3912	20.328	24.2828	28.0874	31.8595	35.2872	37.9654	41.8655	45.261	48.2137	50.948	54.8621	56.6258	60.2335	62.9699	66.3736	68.7886	70.5808	73.1481	76.37	77.9092	79.5812	82.3819	85.2542	86.1197	87.7068	89.5779	92.4289	92.9353	95.2643	95.9445	96.8837	98.5304
	9.97521	10.422	10.3674	10.2652	10.2438	9.2672	9.70313	8.83206	9.36005	10.6286	10.6082	12.5815	15.7941	20.8978	26.5681	32.8119	40.7782	48.5863	56.344	63.7446	72.5336	79.8281	89.0465	95.9357	104.005	111.426	118.631	124.375	130.764	136.334	142.545	145.484	149.199	152.411	154.439	156.388	157.463	160.541	163.405	164.107	166.003	167.377	165.763	166.907	166.946	166.154	165.148	163.411	162.838
	14.9714	16.0125	15.9967	15.4766	15.6543	15.4898	15.6262	16.1428	15.0945	15.8005	16.6275	17.9189	20.0783	23.0142	26.6836	29.6145	32.956	36.0948	39.9126	43.7413	48.4427	52.7916	56.8657	60.6406	64.2808	68.4871	72.5387	76.1033	79.8637	84.2206	87.7699	93.4501	97.6292	102.1	106.323	110.139	113.864	117.111	120.801	123.393	125.849	126.638	128.07	129.3	129.746	131.192	130.585	130.599	131.288
	6.28429	5.84845	5.70397	5.34926	5.41464	5.24141	4.53632	4.32489	3.81368	3.91295	111.45	244.729	253.213	249	236.666	223.195	208.622	196.594	183.35	172.201	162.532	152.358	143.355	134.969	127.37	119.194	112.494	106.474	100.115	94.9062	89.7255	85.6586	81.234	78.3567	73.8182	70.511	66.9028	64.4237	61.1443	58.147	55.7578	53.3651	51.3194	49.658	46.8488	45.1588	43.1941	41.898	39.716
	23.7844	23.2471	22.3443	22.3191	21.8364	21.6134	20.388	19.7947	19.3839	18.8854	57.2183	102.561	121.618	127.262	132.718	134.735	137.454	139.818	143.777	144.358	147.274	151.067	152.853	149.847	155.598	155.751	154.506	154.874	153.901	157.739	158.337	158.556	157.218	162.07	159.271	161.309	158.432	162.203	161.65	158.9	159.776	162.3	158.802	163.428	163.594	162.473	163.919	163.101	164.661
	32.9176	32.447	31.8625	31.9027	32.5388	31.2753	30.6016	30.174	29.7063	30.2138	31.2641	32.8277	33.411	34.1331	34.5291	36.3783	37.4091	38.0839	38.4187	39.3569	40.3773	41.1777	41.8546	42.3121	43.5983	43.4594	45.0833	45.2389	45.3522	45.8724	46.9104	47.9406	47.8286	48.7819	48.4894	50.1319	49.6556	50.5864	50.6088	50.5327	51.3196	51.8327	51.9056	51.3646	51.8298	52.0634	52.3082	52.421	53.1002
	26.5502	26.8802	25.2296	25.3851	25.6275	25.0827	24.4686	24.5426	24.195	24.136	88.4302	161.502	146.301	126.192	106.355	89.5628	75.9886	66.6911	58.653	52.5501	47.288	43.535	41.1787	36.9678	36.4338	34.0594	32.9336	31.191	29.3974	28.2382	27.7563	26.9854	25.6549	25.7592	24.9919	24.4416	23.4745	23.6695	23.5828	22.2174	21.7681	21.5888	20.5588	21.6213	20.7808	20.1159	19.9664	20.2848	19.9135
	21.8972	21.7294	20.5736	20.6442	20.8157	19.7031	19.0911	18.541	17.7243	17.931	25.6106	30.6006	31.4425	32.5659	32.8252	34.0328	34.3628	35.4692	36.1221	36.927	37.8808	38.8823	39.809	39.9042	40.6714	41.252	42.2085	42.3298	42.9583	43.4128	43.7067	44.4727	44.1181	44.9765	44.6367	45.2975	46.096	45.9354	46.073	45.8325	45.4738	45.5003	45.7063	46.017	45.87	45.6264	44.9539	45.6156	44.6686
	26.9371	26.9231	25.69	25.694	25.3793	24.6025	23.845	23.4804	23.266	23.2236	25.7374	27.5297	28.287	29.6943	31.2687	32.215	33.6532	35.3042	35.8917	37.4125	37.8312	39.6392	40.7364	41.2358	42.2796	42.3685	43.9433	44.7527	44.5136	44.4503	45.8205	46.2006	46.7044	47.2068	47.4044	48.0391	47.8562	48.4296	48.8271	48.2974	48.5372	48.646	48.3833	48.9545	48.5266	48.7316	48.7408	48.7993	48.7232
	15.9459	16.777	16.4252	16.1971	16.2749	15.7421	15.2601	15.1452	15.043	15.1989	22.9713	27.2084	27.7298	29.6421	31.3343	32.4778	33.4563	35.4076	35.1452	36.2699	37.602	38.4193	39.9935	40.331	41.1933	41.3805	42.1539	43.2586	42.7555	43.1923	43.8284	44.1311	43.5529	45.0071	43.8364	44.7987	44.5357	45.2305	45.4098	45.2959	44.8298	44.7766	44.5813	45.504	45.5819	44.7818	45.1259	45.0858	44.9358
	11.2306	10.6655	10.2792	10.0902	10.5949	8.99658	9.81285	9.53309	8.43845	9.34151	18.2092	23.4976	24.8774	26.7338	26.0859	27.3665	27.2347	29.2202	29.0374	29.3859	31.0707	32.2232	32.7949	33.1609	34.2556	33.7443	33.6138	33.5871	34.0784	35.7686	35.4392	35.8224	35.9461	34.8212	35.1328	35.9852	35.5849	35.2515	35.827	35.676	35.0281	34.9278	34.5353	34.7401	34.4489	35.3022	33.2709	34.5544	34.0856
	20.2423	19.6514	19.0966	19.1318	19.1229	18.4194	18.0757	17.7972	17.0622	17.6177	20.3042	22.9662	23.4651	25.7009	26.6514	28.5259	29.4909	30.7772	31.7902	33.4335	33.8703	34.9645	36.3368	37.2125	38.2317	38.9355	40.498	41.1463	40.7062	41.5121	42.4616	43.4004	42.8975	44.3821	44.9082	45.3508	44.9985	46.2978	46.1541	45.3918	46.2196	45.9022	46.3589	46.4864	46.9454	47.5264	47.4838	47.0276	46.6551
	21.7369	21.9243	21.5241	21.1686	21.334	20.8421	20.2574	19.7263	19.4285	19.5676	21.2137	22.6861	22.8882	23.5835	24.5749	25.1966	25.7293	27.0259	27.5047	28.1678	28.7951	29.8207	31.0491	31.4771	32.2092	32.6864	33.5311	34.1281	34.2774	35.062	35.2554	36.2681	36.2603	36.8323	36.3116	36.9155	37.5392	37.016	37.7231	37.4746	37.6286	37.5652	38.372	38.3226	37.9636	38.8692	39.2232	38.824	38.9875
	22.1639	21.8202	21.2378	21.1238	21.5471	20.2318	19.8608	19.2259	19.0333	19.0632	22.2548	22.5131	21.7213	22.4883	21.8155	22.2025	22.0447	22.4022	22.4463	22.9926	23.1492	23.4622	24.5249	24.8689	25.0411	25.811	25.8671	26.0839	25.9549	26.4412	26.6377	27.32	26.7604	27.4885	27.2183	27.6382	27.8613	27.792	27.7195	27.8952	27.8314	27.6877	27.6111	27.9405	28.0376	28.0053	28.1686	28.1666	28.5603
	18.1261	17.7915	17.1803	17.223	17.2483	17.1179	16.3355	16.2659	15.8126	16.3609	19.6884	21.1322	21.7838	23.2683	23.5828	24.5909	24.6585	26.6006	27.0623	28.0442	28.2462	28.9237	30.1516	30.2922	31.6952	31.7729	32.6425	32.9757	32.8814	33.6671	34.2032	34.3512	34.3671	35.241	35.0194	35.8126	35.9218	36.4333	36.532	36.2123	36.2956	35.9959	35.8208	37.0019	37.1005	37.4656	37.2212	37.0299	37.0615
	10.9734	10.8474	10.7558	10.1731	10.3192	9.94593	9.34174	9.07609	8.72441	9.13054	14.0828	15.2135	15.789	17.0434	17.9927	18.3735	19.4463	20.2052	21.0017	22.1058	22.3239	23.2498	24.5252	24.3291	25.1004	25.1042	26.6575	26.7755	26.6841	27.1727	27.9643	28.1	27.9256	29.0139	28.6779	28.6914	28.772	29.2539	29.2978	29.1299	28.7794	29.5793	29.1881	29.8531	29.6737	29.9378	29.6923	29.6642	29.1371
	23.9902	23.3614	23.2029	23.2532	23.2532	22.1937	22.208	21.4199	21.1335	21.1024	24.8715	26.6559	27.9544	29.7408	30.9401	31.7491	32.522	34.2973	35.1595	36.3766	36.9264	37.9472	39.8916	39.8745	40.7759	41.2993	42.1543	42.9598	43.0928	43.8816	44.1099	44.9318	44.8691	45.6302	45.2356	46.688	46.6414	46.6166	47.2852	46.7157	46.4952	47.2697	46.4443	47.7229	47.8325	47.9501	47.7307	47.5634	47.4246
	19.6067	18.925	18.8922	18.5832	18.3765	17.7473	17.3068	17.1212	16.2682	16.8139	18.3494	19.7362	20.6347	21.9413	22.9988	24.3152	25.4636	27.78	28.1079	29.7059	30.4707	31.2239	32.6938	32.5378	33.9882	34.7648	35.8151	36.4202	36.0208	37.4293	38.0708	38.369	38.6111	39.7063	39.6315	40.3485	40.361	40.9084	40.8022	40.5097	40.8895	40.8288	40.8288	40.9837	41.1368	41.213	41.3089	41.2684	41.4157
	20.4992	20.3352	19.6769	20.0894	20.2838	19.3156	18.8175	18.577	18.39	18.5829	21.7657	23.2336	24.6843	25.3396	26.5828	27.9407	28.2031	30.3138	31.0712	32.2439	32.6261	33.6974	35.1266	35.6846	36.9008	37.659	38.7377	39.3509	39.0244	39.4604	40.8517	41.1638	41.1917	42.1409	42.1566	43.1277	43.0227	43.2534	43.8826	43.4379	43.3748	43.9159	43.3534	44.4213	45.0202	44.1971	44.465	44.5355	44.3697
	13.3862	13.7221	12.6984	12.2655	12.6446	12.287	11.5014	10.6812	10.782	11.4514	14.7257	15.8063	16.9199	18.4561	19.1598	20.5049	20.7265	23.0312	23.1755	24.5015	25.0382	25.9968	27.4676	27.1704	28.2552	28.8767	29.5073	29.9504	29.641	30.7866	31.4614	31.851	31.4779	32.3142	31.8013	32.6787	32.6544	32.4604	32.9969	32.7438	32.5375	32.2218	31.8503	32.2528	31.9944	32.7228	32.378	32.3089	32.0305
	7.82496	7.83874	7.02079	6.98389	7.35308	6.8754	6.64251	5.88528	5.6601	5.8341	9.578	11.217	11.5076	12.2297	13.0946	14.0201	15.5977	16.5299	17.5693	17.9005	19.14	20.1773	20.7372	20.9678	22.637	22.979	24.7094	25.056	26.2589	26.2702	26.3631	26.9275	26.9457	27.3451	26.8619	28.0336	27.8135	27.6335	27.751	27.0038	26.2121	27.2772	26.71	26.5846	27.0508	26.3791	26.2746	25.8079	25.9988
	20.14	19.5238	19.0698	18.3012	18.0458	17.4052	16.8146	16.2802	15.6521	15.7628	19.7602	21.5248	22.1877	23.7934	25.3255	26.291	26.947	28.4316	28.7912	30.5129	30.9718	32.3136	33.3931	33.6278	35.1993	35.2315	35.7977	37.335	37.3992	37.7454	38.3073	38.7964	39.0006	40.078	39.6255	39.4922	39.7787	40.5894	40.4162	40.2586	40.9758	40.7261	40.5222	41.367	40.5541	40.4173	40.4395	40.3876	39.9533
	21.3698	20.7454	19.9668	19.3916	19.549	18.7099	17.8283	17.1225	16.2573	16.6524	27.1722	29.353	30.0375	30.8797	31.3783	31.8135	31.7102	32.7403	32.4347	32.7223	32.7203	33.2706	33.6092	33.2849	34.0518	33.9848	34.8095	34.9492	34.8432	34.993	35.259	35.1133	34.9601	35.4919	35.2291	35.3674	34.8153	34.7354	34.3837	34.0818	34.2353	33.7735	33.5913	33.6493	32.9777	33.1177	32.8604	32.714	31.927
	17.5593	17.6183	16.495	16.8151	16.9469	15.769	15.6922	15.1683	14.4069	15.2332	21.4412	22.691	23.1995	23.6848	24.0445	24.649	25.3012	26.3412	25.9027	25.9316	26.446	26.3014	26.5826	26.2703	26.257	26.3771	26.665	26.3875	25.6436	25.9543	26.0749	26.043	25.7685	26.0885	25.4976	25.6329	25.4031	25.742	25.2608	24.903	24.9305	25.1089	24.9002	24.9525	24.4295	24.9526	24.597	24.4577	23.8813
	19.5405	19.219	18.9792	18.9648	18.7609	18.0291	17.7012	17.7596	17.5467	17.6152	29.2817	37.1289	38.7262	40.8647	42.0386	42.035	42.2865	43.5643	43.3966	43.3292	43.9178	43.8766	44.5592	44.7785	44.8416	44.1809	44.6267	44.537	44.1277	44.8451	44.6581	44.7379	44.2664	44.999	43.5643	44.6131	43.9439	43.6633	43.7459	42.6946	42.387	42.7565	41.8546	42.1285	41.3658	41.4541	40.52	40.7684	40.5809
	8.72256	8.94397	8.90337	8.91853	9.28256	8.74847	8.46492	8.19222	7.49391	8.20669	169.28	182.34	180.018	174.601	167.709	160.644	152.222	146.076	136.366	129.759	122.463	117.622	112.727	106.033	101.7	97.0777	92.2849	88.2162	84.2002	80.1418	76.573	73.7492	70.3306	67.9121	64.7813	62.5509	59.6164	57.1017	55.2504	52.3735	50.8501	48.9567	47.0336	45.4771	43.5205	42.4993	40.8449	39.3842	37.8975
	17.1296	17.5249	16.5709	16.1009	16.7202	16.3256	16.2522	15.268	15.5024	15.8106	26.0302	27.6668	29.3952	30.6306	31.2569	33.1202	33.5274	35.6784	35.6256	36.7597	37.8996	38.6877	39.6341	39.9082	41.1904	40.608	42.1084	41.4058	41.4147	41.8645	42.3684	42.5587	42.0707	43.4312	42.681	42.277	41.666	42.0206	41.4227	41.5149	41.2574	39.8634	40.0717	40.6165	39.975	39.8646	38.7906	38.9277	38.0909
	13.7728	13.7916	13.3041	13.6438	14.0736	13.0182	13.0666	12.5964	12.0296	12.5978	18.5875	21.6133	23.0854	25.0199	25.5192	27.1434	27.7117	30.0196	30.2998	32.0862	32.802	34.6931	35.194	35.5525	36.0527	36.2354	37.468	37.5279	37.1169	37.9657	38.4309	38.4772	38.8839	39.0984	38.9315	39.2448	39.4301	39.3633	38.1714	38.3532	38.0735	37.4599	37.6737	37.9685	37.5618	37.6765	37.5838	37.93	37.5537
	20.0747	19.3457	18.0313	17.902	17.7947	16.1254	15.6874	15.1042	14.3178	14.6869	17.0725	19.3957	20.4985	21.5469	23.1525	24.2352	25.0447	26.8022	26.8901	28.1116	28.5347	29.5887	30.367	30.5829	31.0076	31.0515	31.8196	32.3585	32.3153	32.7235	32.4105	32.9081	33.0794	33.4115	33.3926	33.6259	33.9081	34.0376	33.8588	33.0793	33.5581	32.7431	32.4764	33.2097	33.17	33.4255	32.4607	32.2291	32.1959
	12.6741	12.6907	12.4285	11.8389	11.6456	11.5176	11.0418	10.7731	9.953	10.5894	14.6044	16.2828	17.4181	21.7995	23.1437	25.3177	27.0214	29.2455	30.4953	31.5344	32.3603	33.1038	34.0764	34.1689	35.0866	35.0312	35.4616	36.0856	35.8794	35.9975	35.9331	35.7152	35.4617	36.1041	34.5558	35.3059	34.3496	35.207	34.7675	33.8732	33.5653	32.6769	32.6068	32.0206	32.0422	31.6377	30.857	31.3656	29.9504
	12.8841	13.4341	13.3735	13.7206	14.1522	13.5547	14.5626	13.8569	13.9438	13.5812	16.7752	18.2695	19.6236	21.2761	22.0437	23.8752	24.0851	26.09	27.1043	28.0597	29.1988	30.7639	31.7113	31.6848	32.4473	33.5446	33.875	33.9566	34.1524	34.9392	34.6215	35.755	35.1576	35.8204	34.9775	36.0713	36.1753	35.6008	35.7409	35.0491	34.9069	34.3379	33.8103	34.0021	33.9429	33.6848	33.7143	33.2673	32.8984
	10.771	10.337	10.6384	9.97576	10.5387	10.1118	9.88239	9.01446	8.77828	8.94945	11.7162	12.9124	13.7366	14.484	15.57	16.4453	17.2631	18.6889	18.8809	19.7201	21.4705	21.6804	23.1959	23.2698	24.5434	24.9481	26.0685	26.5171	26.2283	27.0191	27.5682	28.3997	28.1192	29.2245	28.4209	29.2402	30.0665	29.8057	30.2922	30.2392	30.4162	30.2225	30.2304	30.6883	30.7206	30.5883	30.4384	30.6194	30.452
	16.6866	16.5042	15.7838	15.3485	16.0612	15.4872	15.0393	14.4003	14.2397	14.3201	18.7271	20.5419	22.0403	23.987	25.1422	27.4134	29.1412	30.7937	31.5773	34.1349	34.3638	36.1498	37.4839	37.563	39.0086	39.7951	40.7642	41.0782	41.9082	41.8365	42.9439	43.6644	42.9889	44.2958	44.0813	45.376	44.8318	45.5541	45.8392	45.1051	45.5257	45.3636	44.8985	45.0889	46.008	45.5742	45.6927	45.3566	45.7226
	10.4729	10.1844	9.63595	10.0114	10.0698	9.48043	8.85642	8.62201	8.16634	8.716	11.3096	12.6202	13.6588	15.1431	16.2847	17.4922	18.7014	20.7989	21.0192	22.4672	23.2721	24.1677	25.6999	25.6724	26.5162	26.7708	27.8679	28.3389	28.6266	29.2883	29.4502	30.0534	29.8494	31.1282	30.5467	31.7336	31.1369	31.5136	31.4149	30.4483	31.1703	31.5084	30.8645	31.1714	30.9535	31.2558	31.0039	31.1275	30.6246
	14.5904	14.3855	13.7194	13.2202	13.6311	12.9939	12.5471	12.0525	11.8499	12.2302	14.8086	15.925	16.2089	17.4646	17.9958	19.4266	20.0424	21.5794	22.3917	23.1624	23.5787	25.0777	26.1581	26.4389	28.0286	27.7297	28.992	29.6263	29.8517	29.8853	30.6986	31.3146	31.1719	32.645	32.2774	32.7107	32.9895	32.9293	32.8823	33.0611	33.3722	33.2067	32.8786	33.5151	32.9255	33.0625	33.4486	33.0874	33.0579
	11.7741	11.6888	11.1742	10.9807	11.4474	10.6185	10.5703	10.3188	9.8678	10.3225	13.561	15.7311	17.3499	19.1193	21.5625	24.9693	26.7425	28.0649	28.4418	29.7246	30.3318	31.0035	31.6948	31.6598	32.239	32.9124	33.4751	33.6779	33.65	34.363	34.8737	35.1785	34.4152	35.7411	35.2368	36.1959	35.8209	36.0762	36.0383	35.5204	35.7261	35.4164	35.2352	35.7457	35.2752	35.9815	35.2181	35.32	34.7871
	10.668	10.2998	9.92538	10.135	10.7403	10.3869	10.6161	9.93847	9.47842	9.7491	14.9657	26.6177	40.0988	52.4146	81.1901	154.179	174.367	185.554	188.233	185.728	180.944	174.805	169.981	162.27	156.912	149.055	144.36	138.836	132.214	128.274	122.985	118.385	112.676	108.516	104.36	100.765	97.2338	94.3323	90.954	86.3893	83.6821	81.7902	78.4436	76.541	73.8225	72.677	69.9946	68.1278	65.5616
	26.0302	25.7488	25.0989	25.4186	25.7331	25.0494	24.5728	23.9524	23.2491	23.9673	27.115	29.3937	30.5045	32.244	32.7876	34.7927	35.9331	37.4959	37.0748	38.0814	38.7993	39.7623	40.6323	40.7515	41.4284	41.882	42.8467	42.9907	42.9771	42.955	44.1283	44.2674	43.7552	44.8064	44.1961	44.9363	44.9533	45.7065	45.8824	45.1779	45.7679	45.4435	45.286	45.9464	45.7379	46.0899	45.915	45.9014	45.5459
	23.6031	23.2613	22.616	22.2895	22.8234	22.0939	21.3937	20.9194	20.6083	21.0013	45.1539	111.547	128.166	133.652	133.45	130.568	125.484	119.974	112.205	105.95	98.837	93.8394	88.3681	82.6627	78.8043	74.3269	70.6105	66.8378	62.8143	59.4094	56.8951	54.2241	51.4053	49.9341	46.8304	45.1782	42.9703	41.5441	39.6658	37.4638	36.5645	35.2616	33.9476	32.7955	31.4056	30.4198	29.2464	28.3125	27.3109
	24.1077	24.3277	23.25	22.6962	22.4478	21.6355	20.7185	20.3344	20.4276	20.2728	100.192	119.838	126.539	129.814	129.239	130.3	129.751	127.697	125.295	121.806	119.579	117.802	115.47	112.048	110.359	108.641	106.381	103.504	100.598	98.7456	97.9596	95.7971	93.4092	92.7881	90.7678	91.2137	89.4575	88.7015	88.186	85.4958	85.033	83.825	83.7534	83.2239	81.4518	81.7639	81.6367	81.0581	79.9765
	11.4893	10.9818	11.244	10.4612	11.575	11.4168	11.6994	11.5906	10.867	11.1937	334.615	382.253	383.116	367.696	339.853	310.432	284.444	262.762	240.592	219.484	202.249	187.757	173.323	159.046	147.907	137.694	129.271	120.211	112.372	105.816	98.8145	92.7061	86.9113	83.6684	78.4332	74.1947	70.7596	66.9689	63.2873	60.2822	57.8197	55.0696	52.2363	49.8699	47.5093	46.0953	44.3001	42.473	40.5996
	19.9469	20.0089	18.9692	18.9676	18.3572	17.2419	17.3885	16.8303	16.298	16.1105	23.1456	26.7056	26.8276	28.4756	29.2068	30.3576	31.1281	31.9139	32.8599	33.497	34.1659	34.146	35.2769	35.7853	36.1855	36.0033	36.3802	36.7752	36.4291	36.3847	36.5046	37.0973	36.7888	37.474	36.8051	37.4831	36.925	37.623	37.0558	36.4558	36.7126	36.897	35.9241	36.5866	36.2096	36.5955	36.1703	36.151	36.0586
	13.6256	14.2252	13.5796	13.8632	14.3124	14.1681	13.3173	12.7079	12.6671	14.1335	35.0376	38.1448	33.7283	29.6197	26.438	24.2183	21.8834	21.1783	19.246	18.8641	17.9543	17.5045	17.1384	16.4963	16.602	16.2033	16.1842	15.9387	14.9714	14.9647	15.3194	15.343	14.9423	15.7459	14.4783	15.2537	15.7475	15.759	16.1733	15.7993	16.2352	16.9629	16.6787	18.7998	19.0582	20.3103	20.7135	20.96	22.2038
	16.6753	16.471	15.7813	15.9526	16.1217	15.7493	15.2278	14.7516	14.6962	14.5007	17.8939	19.9175	20.727	22.1671	22.8338	24.1482	24.9483	26.1989	26.8497	27.7818	28.6491	29.4716	30.7972	30.6798	31.8361	31.9609	32.8622	33.4206	33.6801	34.3909	34.707	35.0119	34.5755	35.7775	35.6783	36.3217	35.8721	36.8098	37.2988	36.6845	36.916	36.8121	36.8704	37.8193	37.6875	37.703	37.3268	37.2214	37.621
	19.7315	19.6603	18.6081	18.7122	18.8603	18.1432	17.5063	17.0149	17.2887	17.3422	21.8357	23.6517	24.1443	25.6021	25.9032	26.8696	27.7943	28.7294	29.2609	29.3011	29.5877	30.7305	31.2496	31.2595	31.8917	32.7395	32.7399	33.0546	32.6867	33.2565	33.5736	33.955	33.585	34.5025	33.7407	33.9787	33.8433	34.0383	34.271	33.3637	33.8497	33.843	33.6147	33.9061	33.6425	33.824	34.1054	33.8394	34.0712
	17.9615	17.7067	17.4401	16.7782	16.9533	16.1027	15.8906	15.1619	15.0217	15.3559	29.9302	42.6882	45.4489	46.9853	47.4857	47.629	47.4871	48.4824	47.9045	47.4899	47.098	47.2589	47.2196	45.8031	45.614	45.5284	44.615	45.0223	43.8532	44.0783	42.6249	42.907	41.6021	42.5759	42.079	41.4212	41.0129	40.8443	40.082	39.4421	39.3941	38.9083	37.9316	38.097	37.5734	37.6073	36.8893	36.7366	36.1626
	10.6951	10.6952	10.2591	9.83313	9.84089	9.0882	9.2317	8.48401	8.25838	8.61279	24.4978	27.5604	30.4717	32.1759	33.7724	36.4696	39.1228	41.9467	43.2578	44.6006	46.3821	47.5891	48.4482	48.2013	47.6411	47.7659	48.6613	47.7542	47.0537	45.2943	44.6989	43.9319	43.0094	42.493	41.0754	40.6614	39.4857	38.9987	38.057	37.2182	36.7796	36.2269	34.7964	34.7843	33.7799	33.0132	31.8146	31.3997	30.5388
	23.755	23.2691	22.4621	22.8153	22.8896	21.9322	21.3436	20.9233	21.4756	21.6664	25.6694	28.4015	29.8518	32.6225	34.3988	36.4077	37.6649	39.5488	41.7156	42.342	43.9543	46.3315	47.5495	47.7633	49.2929	49.8997	52.3246	52.1952	52.5901	53.5872	53.5801	54.5897	55.0062	56.0495	55.3418	56.2265	55.968	56.6577	56.9461	55.668	55.9	55.9685	55.5375	55.8082	55.4444	55.4801	55.8114	55.388	54.8396
	14.7999	14.4907	14.4544	14.6947	14.2874	13.3098	13.239	12.0718	12.1628	12.8067	16.8627	18.6606	18.865	20.9421	21.6403	22.217	23.4306	25.6829	26.0307	27.1142	27.8834	29.1466	30.0542	30.3894	31.5829	32.0387	31.8758	32.9604	33.0993	34.5731	33.8772	35.0347	35.3176	35.9077	35.1364	36.3142	36.6222	36.5405	37.1964	36.7185	37.9376	37.8705	37.4135	37.3553	37.7405	36.9744	36.9594	37.1153	37.0601
	6.69686	7.01367	6.10364	5.89705	5.98242	5.5552	4.70362	4.75741	4.34535	4.68043	7.69056	9.59677	10.0219	11.7785	13.1405	14.628	15.598	16.8991	17.6539	18.8782	19.6423	20.0675	21.2116	21.1388	22.6044	23.2087	23.4518	23.9361	23.7655	24.5017	25.0293	25.2711	25.2816	26.3046	25.8681	26.9324	26.5842	27.3756	27.1224	26.4338	27.1232	27.0115	26.8793	27.7784	27.2785	26.9883	27.1388	26.8404	26.8349
	22.3868	21.7702	20.1536	20.2489	19.8826	19.1188	18.2345	17.6343	17.4977	17.3653	19.9346	21.5514	21.6893	23.1909	23.5764	23.9767	24.5355	25.3084	25.6425	26.4595	26.8335	27.4008	28.118	27.5333	28.6823	28.2807	28.9907	28.9945	29.1017	28.9007	29.0934	29.9732	29.4179	30.8632	29.9044	30.6917	29.7251	30.32	30.1774	29.8425	30.0992	29.6634	29.7907	30.2484	30.2988	30.6801	29.7564	30.1144	30.2589
	17.881	17.5435	17.104	16.7742	16.278	15.7559	15.7579	14.8722	14.4544	14.5286	19.2304	22.2906	22.7991	23.669	23.8504	24.3702	25.0507	25.771	25.4889	26.3729	27.0272	27.6119	28.2144	28.1855	28.949	28.8265	29.3551	29.5389	29.1812	29.7185	29.8066	30.123	29.4716	30.7615	29.8239	31.0931	30.3847	30.9414	30.978	30.0441	30.6584	30.6443	30.5579	30.5842	31.0065	31.1332	30.6208	30.5869	30.6108
	23.5869	24.034	23.9574	24.1619	24.4643	24.4158	23.6199	23.3831	23.4655	23.0286	27.6242	32.3534	36.616	41.3455	47.6114	53.261	58.7224	61.5646	62.4815	64.475	64.7946	65.8973	67.3275	68.4181	68.4136	68.3875	69.6921	69.8141	69.2358	68.1747	69.1607	70.0512	68.5398	68.906	68.0331	67.9066	67.8167	66.1509	66.268	64.7783	64.5012	63.5862	61.6924	61.6555	60.8343	60.7426	59.7802	58.8722	58.4407
	14.6109	14.6587	13.7043	14.0992	13.9028	13.6145	12.9394	11.6676	12.0059	12.2693	16.4161	39.1586	55.8461	60.9379	64.4072	69.2741	71.5547	72.9654	71.6565	70.4321	69.1032	69.4056	68.1625	67.3596	66.6608	65.966	65.2518	64.5193	63.5594	62.4639	61.8858	61.538	59.9183	60.3106	58.2588	58.0481	57.0999	56.3183	55.7401	55.3403	54.1638	53.1914	51.7544	51.9917	50.2062	50.7502	50.0345	48.6908	47.9688
	10.0882	9.69226	8.61413	8.9897	8.91606	7.84509	7.07248	6.23444	5.27881	5.97943	12.1392	154.242	401.171	407.723	382.205	352.01	315.014	282.129	250.826	225.843	203.659	184.777	168.591	153.075	141.345	129.196	119.838	110.674	102.011	94.9992	87.8435	82.6196	76.3902	72.5293	66.2116	63.0601	58.8402	55.5602	52.7278	49.0535	45.8984	44.1447	41.7939	39.983	38.0473	35.9056	34.1293	32.9997	31.3234
	22.9721	21.982	21.8554	21.3108	21.0624	19.9882	20.2665	19.6314	18.8645	18.6345	23.3748	25.6103	27.6188	30.9873	33.2667	36.8133	38.7269	41.5502	42.8107	44.3815	45.5903	47.0445	48.6709	49.132	50.7685	51.544	53.9521	54.1693	55.4827	56.4473	57.2751	57.5334	57.6835	59.6151	58.2979	59.9209	59.8431	61.0713	60.9882	60.1027	60.5314	59.3982	59.7211	59.007	60.0304	59.1963	59.1636	58.6923	57.9993
	4.9581	4.18775	4.36233	3.73849	3.77947	2.98077	1.65989	0.838034	0.436273	0.674619	127.228	228.408	239.156	230.1	213.258	197.366	183.037	167.097	154.418	141.11	129.439	119.812	110.413	101.37	93.7109	86.8889	80.5566	74.8787	68.6837	64.4327	59.9176	55.7638	52.0365	49.0135	45.2532	43.6986	40.4436	38.9937	35.789	33.3919	31.7354	30.0586	28.4047	26.9031	26.0533	24.3651	23.4461	22.9917	21.4961
	17.7477	17.0695	16.2706	15.9735	16.3929	16.0109	15.099	14.2399	14.2465	14.4127	19.2496	21.3792	22.6416	24.7985	25.4161	26.9864	28.6039	29.4358	30.5159	31.5607	32.2958	33.3447	34.2417	34.8807	35.1831	36.5017	36.3283	37.0779	36.633	37.0692	37.19	37.5044	37.1335	37.8936	36.4843	37.0216	37.0748	37.3923	37.2959	36.5858	36.3916	36.2439	35.4248	35.8104	35.624	35.3918	35.6151	35.7929	35.4138
	17.6165	17.2251	16.8569	16.7021	16.9316	16.0477	16.0496	15.5838	14.8163	15.7391	20.7344	22.964	24.5172	26.6215	27.5991	29.451	30.4851	32.8327	33.1365	35.6511	36.8522	37.8773	38.7714	39.3133	40.2777	40.7933	42.6993	43.7252	43.4818	44.446	43.9657	44.582	45.1505	45.313	44.9349	46.2035	46.2516	46.3885	46.7556	45.179	45.8717	45.0269	45.4581	45.4229	45.8262	45.1645	45.0872	44.7417	45.1712
	15.2954	14.6879	14.2327	14.3313	14.796	13.8818	13.2644	12.8274	12.8028	13.2047	25.4082	26.2371	26.5186	27.6326	27.8617	29.0449	29.7979	31.1684	31.6146	32.6578	33.5512	34.3623	34.7428	35.1474	35.7925	35.4359	36.6165	36.6099	36.849	37.4273	37.8057	37.8307	38.0868	38.0187	37.9294	38.0987	37.8845	38.3385	38.0838	37.5208	37.6476	37.1951	36.9704	37.115	36.7975	37.0466	36.6595	36.0934	36.1357
	20.0104	19.4406	18.9494	19.1577	18.764	18.2395	17.611	16.9691	17.0276	17.2717	49.4029	61.358	63.9998	64.4346	64.296	63.6004	63.6076	62.8684	62.0111	61.389	59.8327	59.566	58.8452	57.706	56.7208	56.3638	55.708	55.5211	54.4024	53.4757	53.0794	52.2277	51.315	51.2556	50.0426	49.3898	49.2637	48.5771	48.3852	47.1603	46.6731	45.4262	44.8018	45.1558	44.1811	43.545	43.585	42.5275	41.9052
	9.56952	9.37492	9.22336	8.53351	8.82153	8.48322	7.85989	7.51968	7.82405	7.74335	11.1344	17.7797	21.7968	24.6835	27.8783	34.3772	36.0469	37.0668	38.1217	38.876	39.1694	39.394	40.3002	39.8441	40.1594	39.6357	39.283	39.2272	38.6691	38.8079	38.1864	37.768	37.3872	37.5193	36.4109	37.29	36.1308	35.9861	35.8951	34.7817	34.6848	34.308	33.1786	33.7043	33.6025	33.6362	33.2165	32.9882	32.1065
	24.1447	24.5993	23.7206	23.9393	24.1726	23.2884	22.6871	22.4025	22.728	23.4908	26.882	29.6573	30.1523	31.8596	32.513	33.3599	34.5595	35.8775	36.6475	37.3296	38.3175	38.869	40.079	40.2563	41.1815	42.4297	42.9061	42.8331	42.3036	42.7377	43.2104	43.3799	43.7431	45.1329	43.7172	44.2424	44.313	45.0429	44.7828	44.0803	44.1317	44.398	44.0512	44.4938	44.8822	45.0383	44.6349	43.9142	44.1152
	19.5951	19.3265	18.7978	18.317	18.461	17.9056	17.1848	17.0247	16.464	16.6766	15.6171	25.1113	34.1288	37.0837	39.6681	44.0667	45.7141	47.4883	47.6868	47.8947	48.0283	48.3505	48.5563	48.3397	50.1178	49.75	51.0048	50.8689	50.7321	51.3173	51.622	52.5406	52.4955	53.9848	51.6503	53.0756	53.2179	53.0238	53.8624	52.8084	53.0782	53.7428	54.0423	53.7418	53.8251	54.4613	54.1834	53.7191	54.2666
[truncated: 132 more columns]

## Sheet: Panel E
IP3R1 shRNA hNPC	17.1335	16.1251	15.9965	16.1495	15.6146	15.6772	16.5489	15.9956	16.1384	15.511	16.2219	16.752	17.7662	18.6887	19.2826	20.4872	21.3886	21.9799	22.5532	24.4157	24.8204	25.4025	26.2357	27.2533	27.8605	29.1627	28.8019	29.5443	30.8681	31.744	32.7136	33.0117	33.2181	34.4687	34.7742	35.4013	36.2671	35.8322	36.2029	37.6799	38.1162	37.7443	38.3285	38.918	39.6665	39.3625	39.4656	39.9268	39.6262
	24.6659	24.1347	25.0034	24.3063	24.4166	26.1704	26.3021	26.3842	27.3679	28.7935	28.4993	31.5917	35.4475	38.8525	42.7684	46.7523	50.15	53.6344	56.8914	60.0422	63.0825	65.7858	69.9046	72.4171	76.3181	79.4207	82.0577	85.172	88.7626	91.8307	93.8012	96.3258	99.0142	100.881	101.855	105.267	108.212	108.391	110.056	111.206	111.924	113.072	113.982	115.332	116.623	116.602	116.668	116.763	117.677
	13.034	12.8922	12.6171	12.9618	12.2174	12.6548	13.2556	13.3315	13.0354	13.5886	13.8023	14.8472	15.9137	16.7334	18.9033	20.1402	21.6108	22.6556	24.0966	25.1451	26.4821	27.7047	28.7512	30.2531	32.0882	32.9281	33.8315	34.742	36.1437	36.9239	37.815	39.0458	39.7758	40.8851	41.1575	42.1555	42.5905	42.3432	44.2191	43.5722	46.0153	45.2858	45.5677	46.4424	47.3854	46.7546	46.018	47.1801	47.65
	11.6216	10.7455	10.9278	10.7885	10.9688	10.8795	11.6056	11.2323	11.5144	11.6618	12.2275	12.6646	13.2269	14.3969	16.0097	17.6978	17.8791	18.9145	19.3545	21.2573	22.0194	23.1251	24.3129	25.502	26.0184	26.9187	28.196	28.9141	29.677	30.6459	31.426	32.5931	32.9768	33.8372	34.0022	35.2663	35.6757	35.9627	36.6614	37.5416	38.4104	37.5387	38.5835	39.4174	39.3064	40.0669	39.5908	39.8296	40.4082
	11.7431	10.5823	10.4409	10.7991	10.8765	10.2576	10.9355	10.7225	10.6675	10.5009	9.94899	11.3841	11.9463	14.0422	15.561	16.3607	17.0468	18.5537	20.2177	21.8618	22.6705	22.7563	25.2587	26.1154	26.7604	28.7747	28.9818	30.727	32.1172	33.1251	33.8714	33.8598	35.4363	36.3451	36.7187	37.0461	38.7987	38.5462	39.3815	40.7068	42.4173	41.3084	41.7905	43.3368	43.157	44.0386	42.875	44.9288	44.9718
	9.27094	8.561	8.92604	9.18855	8.88785	9.31709	9.59381	9.53337	8.82837	8.78163	9.58139	9.90375	10.7605	11.5532	12.2292	13.4805	14.7394	15.1182	16.304	17.4519	18.2667	19.1671	20.191	20.7822	21.6394	22.5447	22.981	23.8787	24.837	25.8585	26.1596	26.9618	27.6505	27.9607	28.5705	29.5334	30.2405	30.079	30.7549	31.8993	32.9408	32.7018	32.7288	33.9208	34.2194	33.5442	34.2489	34.5731	34.9384
	18.1778	17.816	18.5559	17.6382	17.8151	18.0033	18.1703	18.1123	17.5496	17.9858	17.6093	18.368	19.4872	20.5826	21.4383	23.1667	23.1115	24.7621	25.5427	26.9662	27.5238	28.5125	30.3643	30.8991	32.2756	33.3767	33.4439	34.5021	35.3528	36.8202	37.0132	37.529	38.2733	38.4146	39.7139	41.1682	40.9706	41.0935	42.1595	42.5679	43.6554	43.9442	44.0388	45.1039	44.6412	45.1701	45.3956	45.2147	46.123
	15.159	15.5723	15.4469	15.334	15.8023	15.8984	16.8931	16.7901	16.4224	16.6421	17.7929	18.0464	18.5488	19.7717	20.9166	22.226	22.3276	23.1404	23.8399	24.9779	25.3039	26.6382	27.7484	28.3744	29.2157	30.2228	31.1432	31.134	32.5567	33.3041	33.473	33.9618	35.3071	35.1801	35.7352	36.4977	37.4374	37.4831	37.6847	38.3352	38.7739	38.9545	38.7775	39.327	39.6429	39.6789	39.5256	40.3646	40.7458
	11.0576	10.5981	10.8335	10.8423	10.7439	11.0994	12.1498	12.0257	11.4789	11.7546	11.6367	12.0576	12.7139	13.4403	14.8494	15.5175	15.9046	16.7591	17.6366	18.8944	19.1573	20.0421	21.1457	21.2301	21.6231	23.2128	23.485	23.8925	24.9685	26.0825	25.697	26.6712	26.9892	27.2911	27.6975	28.096	28.4676	28.8452	29.3756	29.4418	30.2924	29.641	30.2415	30.416	31.588	31.5112	30.8523	31.8707	32.3038
	20.0672	19.0445	20.0625	19.0914	18.8643	19.6	19.449	19.4245	19.076	19.0608	20.6878	21.6427	22.0609	22.7079	23.3683	24.1642	24.2998	25.0272	25.8446	27.0647	28.081	28.6318	29.3564	29.6456	30.9597	31.7642	32.0996	33.0813	34.8313	35.2022	35.9468	36.5186	37.124	38.4171	38.9747	39.578	40.7002	41.1192	41.454	42.555	43.5687	43.8616	43.6561	45.1527	45.3555	45.1972	45.3219	45.3212	46.1499
	12.7027	11.9649	12.6686	11.9523	11.9543	12.3478	12.2531	12.5457	12.0196	11.7183	15.6449	14.8965	14.1169	14.4332	15.7771	16.4945	16.8282	17.9393	18.9785	19.9169	20.8956	21.7636	22.847	23.7681	24.3395	25.2536	25.9836	26.3965	27.8419	28.591	29.422	30.1885	30.3363	31.7454	31.6289	32.8765	33.3357	33.7445	34.1718	35.135	35.716	36.0079	36.0996	37.6948	38.1934	37.8639	37.9645	38.9433	39.1514
	18.2964	17.6921	17.3875	17.5873	17.3524	17.36	17.8956	17.7345	17.3696	17.5993	18.6722	19.4095	19.9906	20.6763	21.8768	22.8642	23.6784	24.0581	25.5256	26.5966	27.0153	27.7404	28.8449	29.7184	30.3297	31.1037	32.0755	32.5819	33.8967	34.7575	34.993	35.1219	36.0061	37.1248	37.0603	38.4388	39.1791	38.6604	39.4147	40.7339	41.0298	41.4563	41.6253	42.4376	42.9247	42.7923	42.8266	43.5911	43.7721
	18.6651	17.7371	18.1787	18.2141	18.6662	18.4187	19.3108	18.9782	18.8739	18.8054	19.6615	19.9237	20.3302	21.0114	22.0001	23.0737	23.4845	24.2745	25.211	26.7593	26.6729	27.6947	28.5317	28.8853	30.1253	30.4963	31.074	31.73	32.6476	33.6158	33.9354	34.5374	35.1779	35.5209	35.9749	36.4079	36.7687	37.3577	37.6178	38.4315	38.8801	38.6537	38.8041	39.7829	40.1231	40.1751	40.372	40.5372	41.0124
	12.2186	11.1354	11.1164	10.7683	11.3224	10.8818	11.7966	11.61	11.1089	11.9953	12.2426	12.8607	14.2343	14.8712	15.6649	16.6386	17.1868	17.5372	18.7461	19.2192	20.2729	20.6678	21.6268	22.3038	23.3333	24.3551	24.2677	24.6361	25.8104	26.0019	26.6324	27.059	28.5101	28.2165	28.0896	29.5572	30.369	30.6101	30.7358	30.7916	32.4143	31.4516	32.2693	32.5297	32.4551	32.4878	32.2248	32.0093	33.0565
	5.15661	4.9346	5.33569	5.25815	4.91399	5.58327	6.40679	6.25408	5.87635	6.3358	7.48178	8.87022	10.8956	12.2628	13.9228	16.3776	17.5525	19.2635	21.0715	23.1032	24.5579	25.8506	28.0966	29.6907	31.3856	33.3399	34.7635	36.8062	38.5998	39.6767	41.161	42.9453	44.3428	45.891	47.2603	48.963	50.4506	51.1995	52.7309	54.54	56.5186	56.9633	57.9141	59.8052	60.7844	61.4606	62.4033	63.9544	64.6203
	11.1233	10.8632	11.101	11.0045	10.7896	11.4948	11.7492	12.125	11.4219	11.3696	11.1588	11.5553	11.8268	12.6543	13.3447	14.8994	14.4484	15.011	16.1854	16.8252	17.3808	18.0729	19.3765	18.9517	20.1389	20.498	21.1578	20.9648	21.9009	22.4439	22.0959	22.5498	23.1666	23.9103	23.7249	24.6407	25.0331	24.7239	25.4453	26.2819	26.2082	25.8952	26.0379	26.4881	26.958	26.5077	26.6519	26.6942	27.0742
	17.7279	16.8142	17.6689	17.1084	16.9085	17.4267	17.9206	17.3934	17.287	17.0798	17.0387	17.5348	18.5638	19.8229	20.7023	21.3372	22.516	22.6184	24.0481	24.9597	25.3992	25.0659	26.6976	27.2971	28.7761	28.9857	29.8759	30.3079	31.943	32.1219	31.9582	33.2032	33.1236	34.4601	34.1387	36.1471	36.4561	36.0522	36.542	37.4707	38.4035	37.4542	38.3291	38.6268	39.8396	39.3609	39.1021	39.234	39.9525
	9.79795	9.25723	9.55209	9.65377	9.08245	9.7479	10.5495	10.7843	10.3488	10.0425	10.5666	10.4697	11.6185	11.8005	12.7566	13.8465	13.9802	14.5189	14.9058	16.3151	16.4822	16.8426	17.5565	17.9022	18.9198	19.5357	19.4357	20.0727	20.8887	20.9579	21.1143	21.8072	22.2001	22.0414	22.6403	22.9003	23.6897	23.3266	23.3246	23.938	24.3011	23.7775	24.3795	24.837	24.4418	24.5155	25.272	24.9782	25.3946
	14.309	14.0246	14.8183	14.0196	14.6981	14.5697	14.9429	15.0517	14.8215	14.5923	15.6675	16.3403	16.5297	18.0215	18.93	19.5696	19.2215	20.9571	21.4071	22.3888	23.0906	23.8168	24.8022	25.4661	25.3128	26.5113	26.8139	26.4573	28.153	28.8586	29.0689	29.1966	30.1076	29.8851	30.4974	31.353	32.2307	31.2138	32.6185	32.7247	33.9048	33.7824	33.8531	34.3258	34.4945	33.6454	34.4082	33.9969	35.4358
	16.7349	15.8969	16.286	16.1618	16.1144	16.1951	16.6207	16.6332	16.0458	16.5728	16.9551	17.1829	18.0511	18.6547	19.7023	20.3453	20.5491	22.1574	22.9468	23.7948	24.2633	25.0845	26.2387	26.7432	28.2263	28.4825	30.0322	30.7078	31.6261	32.6724	33.4569	35.149	35.0555	35.8275	35.4476	35.5498	37.0223	37.2524	36.7262	37.1784	39.0559	38.3566	38.5407	38.5326	38.9462	39.029	38.9311	39.5128	40.8865
	18.358	17.9346	17.9508	18.0535	17.6013	18.3613	18.639	18.5117	17.8618	18.2668	19.215	19.7518	21.2305	23.3192	24.1059	25.2158	24.5833	24.1094	25.0079	25.5413	26.5393	26.8681	28.4561	29.2186	30.3018	31.2741	31.5189	31.7661	33.2425	33.4959	33.8813	35.3181	35.1604	36.1818	36.6674	37.6464	38.5521	39.0325	39.0418	40.1321	40.9773	41.1032	41.289	42.5567	42.6523	42.9791	42.9579	43.9301	44.0049
	20.0285	19.8626	19.8297	19.5117	19.4195	19.5322	19.2418	19.9061	19.5415	19.4203	20.2065	20.1944	21.2585	22.7722	23.8123	24.8037	25.599	27.0201	27.837	29.62	30.461	30.9716	32.0437	32.7709	34.3239	35.6838	36.2991	36.651	38.2485	39.1206	39.7408	40.2097	41.1071	42.1286	42.9519	43.7659	44.6374	44.4048	45.305	46.5108	47.4214	47.7681	48.5414	49.0212	50.0661	50.1931	49.9936	51.2008	51.9437
	17.0466	16.5176	16.7615	16.4013	16.7992	16.8701	17.7273	17.7589	17.4028	17.5753	17.1441	17.4811	18.6166	19.3316	20.3851	21.1019	21.8427	22.8086	23.5152	24.4459	24.9617	25.8036	27.4518	28.1747	28.7643	29.9086	30.0592	30.6975	31.699	32.3003	32.5362	33.7373	33.7269	34.2919	34.9044	36.0391	36.2942	36.1573	36.9101	37.4201	37.6385	37.5453	37.5993	38.7751	39.2957	39.2115	39.1728	39.5488	40.2451
	16.5145	16.2838	17.0731	16.6298	17.6872	18.5008	19.2125	19.7909	18.8599	19.3077	19.0687	19.98	20.8252	21.2413	22.7202	23.8161	24.6097	25.8492	27.3484	28.4046	29.1392	30.667	32.2527	33.2775	33.9323	35.3222	35.8132	37.1344	38.065	38.4125	39.3848	39.8919	41.045	42.0725	41.9931	43.116	43.7517	44.1212	44.7609	45.2425	45.8263	45.3025	45.0232	46.2059	46.7014	46.8926	47.1572	48.0795	48.3403
	9.85605	9.93408	9.98208	10.0027	9.67766	9.81009	10.5347	10.5719	10.0974	10.1068	10.608	10.0658	10.9744	12.4585	13.0022	14.0841	14.4639	15.0339	16.0216	17.2974	17.2438	18.0416	18.6893	19.6193	20.3317	21.3177	21.6589	22.2913	23.6114	23.9779	24.2899	25.1974	24.8274	26.3635	26.2639	27.3079	27.9185	27.7757	28.6285	28.8149	29.4712	28.9085	29.6383	30.239	30.7708	30.6339	30.7405	31.8372	31.8218
	3.63786	3.10027	2.93815	2.79993	2.93863	2.90352	3.4618	3.60359	3.5417	3.39181	3.33889	4.59732	6.78001	8.51664	10.8133	13.1518	14.153	16.44	19.1137	21.3008	23.085	24.9441	27.0984	28.7003	31.0129	32.5618	33.656	35.6744	37.8905	39.5522	40.5255	41.9356	43.1629	44.7899	45.8475	48.093	48.3922	49.2301	50.8176	52.4622	53.8305	54.3101	54.8701	55.9347	56.9642	57.5955	57.288	59.1398	59.9345
	5.88479	5.44724	6.10121	5.45055	5.17529	5.07929	5.48064	5.21557	5.01839	4.85913	7.47788	8.76141	10.2954	12.114	13.4862	16.3537	17.4569	20.0754	22.2451	24.0167	25.4253	27.7607	29.7808	31.2945	33.4445	35.3145	37.0085	38.4039	40.5985	41.8065	43.2587	44.6684	45.5391	47.6568	48.6895	50.3827	51.5655	52.321	53.4507	55.527	56.2547	56.3753	56.6473	58.2174	59.1325	59.1545	59.697	59.7405	59.8368
	8.66272	8.24978	8.92505	8.06542	8.05036	8.32354	8.89675	9.0646	8.44211	8.87275	10.5174	12.1054	13.9628	15.7407	17.7734	20.2366	21.9056	23.7068	25.939	28.0095	29.6696	31.5376	33.9013	35.2489	37.4714	39.0913	40.5435	42.0802	44.5326	45.573	47.13	49.0694	50.9233	52.1294	53.2908	54.9235	56.0809	57.6145	58.7254	59.7161	61.3684	61.4232	62.5653	63.8506	64.278	65.1671	65.0568	66.5541	67.1934
	32.8833	33.085	32.8373	33.7901	33.4676	34.4054	35.5827	35.785	35.1905	35.4513	34.6036	35.7013	36.6452	37.3799	38.0024	39.3977	38.9336	40.3444	41.6016	42.0758	42.8628	44.1735	45.0742	45.8851	46.324	47.0968	47.7073	48.5524	49.3584	49.8721	50.1178	51.1051	51.445	52.2639	52.2195	53.2901	53.5178	53.5551	53.8143	54.5559	54.468	53.9695	54.3235	55.1476	55.6557	55.7491	55.6383	56.1462	56.8987
	20.5957	19.3317	20.8194	20.6271	20.3798	21.1744	21.4965	21.5853	21.1631	20.9505	21.7667	23.0809	23.3451	25.1967	25.6506	26.326	27.8797	27.995	29.4575	30.4376	31.2285	32.0326	33.5161	34.151	35.0956	36.41	36.6205	37.6214	38.7936	39.5238	40.0187	40.5526	40.9977	41.8162	41.2852	42.861	43.4903	42.9217	43.8537	44.1471	44.7419	44.3367	44.6903	45.0137	45.0309	45.2855	44.9446	45.2884	46.0337
	17.4182	16.6595	17.5703	17.2539	17.1132	17.7555	18.4759	18.0373	18.046	18.3698	18.7674	19.1966	19.5416	20.7906	21.5801	23.0732	24.0219	24.279	25.4601	27.0427	26.9893	28.512	29.6503	30.067	31.1134	32.2442	32.2346	33.2416	34.4282	35.1629	35.3	36.7262	37.1302	37.855	38.3686	39.3767	39.8418	39.8732	40.9753	41.2183	42.1211	41.9063	41.6591	42.5345	43.737	43.8941	43.6928	44.1539	45.1976
	26.3048	26.351	25.6202	26.6238	26.6474	27.4705	28.6301	29.0058	28.4045	28.64	28.4734	30.0294	32.0101	33.264	35.0163	36.7238	37.78	39.2541	40.7826	42.3087	43.6946	45.4281	46.5141	48.0976	49.1175	50.5804	51.1947	52.7767	54.2297	54.9283	55.6658	56.8877	57.6194	58.6595	59.4195	60.4339	60.9918	60.8543	61.847	63.5445	62.8561	61.9673	63.2762	63.7924	64.8718	64.7489	64.9892	65.8813	66.6908
	24.0778	23.3521	23.4132	23.6163	23.8793	24.1168	24.6741	25.1891	24.0869	24.6026	24.2403	24.7918	25.9107	27.1538	28.1977	28.9492	29.7351	30.1014	31.5034	32.6838	33.1576	33.8056	34.7926	35.4348	36.9694	37.6872	38.2918	38.6237	40.2372	40.647	40.9017	42.0959	42.2255	42.6325	43.3787	43.2308	44.1618	44.0098	44.7109	45.2812	45.5011	45.5137	45.212	46.172	46.4694	46.4366	46.7645	46.9972	47.1839
	17.4267	16.8887	16.1546	16.3613	16.5962	16.9475	17.2951	16.7171	16.8528	16.259	17.1943	18.1731	18.8111	20.2641	21.486	23.5375	24.2094	24.8207	26.1729	28.0961	29.2504	28.8076	30.5387	31.3004	32.5734	34.738	34.1109	35.2808	37.0578	38.3039	38.5377	39.0224	39.5543	40.4492	40.865	41.8529	42.6128	42.7731	43.2886	44.0633	44.3213	45.2796	45.9478	46.5334	46.8834	46.4943	46.6543	47.5152	47.7211
	11.5761	11.2325	10.3487	10.3969	10.9341	10.6527	11.3217	11.8356	10.9376	10.6909	11.0289	12.6253	11.8694	14.084	14.5373	15.833	17.2487	18.5609	18.991	18.6572	18.8661	19.7454	20.3647	20.9426	22.0416	23.0526	23.3675	23.3061	24.0825	25.3992	25.6037	26.4029	26.9671	26.5782	27.1799	28.3135	28.3825	28.7093	29.7977	30.471	30.5816	29.9798	31.1674	31.7643	31.6943	30.5396	31.1201	31.7949	32.5026
	1.50617	1.41242	1.15303	1.3539	1.64771	2.03287	2.01673	1.5527	2.47578	1.94165	5.3325	6.79069	8.40148	9.84367	11.7688	13.4066	15.5655	17.5768	19.4529	20.8262	22.8319	24.7547	25.9589	27.405	29.2142	30.6419	31.7434	33.2952	35.263	36.2765	37.7858	38.9087	41.2685	42.8844	43.8437	45.7376	46.6922	47.638	49.7004	49.6403	51.3252	52.3614	54.0383	54.8341	56.3545	56.1833	56.7991	57.6858	58.447
	6.56956	7.07078	6.30813	7.08167	6.59622	6.79028	6.86731	6.80845	6.71016	6.63181	9.27817	9.93206	10.8626	12.0121	13.6438	14.785	15.5037	16.5518	17.4781	17.4446	18.7144	20.6178	20.2762	21.1757	22.2166	23.28	24.0061	24.3663	25.7077	25.5812	26.7112	27.1071	27.781	28.8012	29.3029	29.6484	29.6758	30.7723	31.3081	31.8781	32.0892	32.3432	32.6297	33.1385	34.1483	33.7634	34.3059	34.5911	34.9342
	0.875001	1.89219	1.51636	1.49374	1.37466	1.75364	1.69355	1.97616	1.92399	2.18016	4.76733	6.01346	7.70053	9.26575	11.2225	12.9993	15.2257	16.3943	18.5653	19.7696	21.4028	24.1016	25.3648	26.1785	28.0601	30.1794	32.2339	34.6891	35.9582	37.489	38.8182	40.0021	41.4553	42.8665	44.1336	45.6038	45.508	46.8612	48.3895	47.9631	49.194	49.8411	51.6432	51.8329	52.2964	52.2899	53.1126	53.922	53.5945
	17.8421	18.0722	18.0007	18.5047	18.427	18.6157	18.4384	18.1384	18.5531	18.783	20.8366	21.6757	22.774	23.6561	25.1273	26.5137	27.2637	28.2633	28.8429	29.6765	31.0104	32.3645	33.2369	33.5412	34.7913	35.6264	36.2941	36.9311	38.0345	38.0134	39.5409	38.8602	40.838	40.2999	41.3532	41.5305	41.6013	41.9486	42.3871	42.1884	43.2136	43.1308	43.4799	43.9658	44.3921	44.0876	43.9653	43.7288	44.3888
	13.3713	13.6499	12.982	13.1919	13.8697	13.192	13.2713	13.1773	13.5233	13.4463	15.9986	16.5672	17.2434	18.4149	19.3319	20.0597	21.2822	21.7309	22.4273	23.1076	24.2765	25.5126	25.7452	26.4735	26.7799	27.4767	28.2556	28.7514	29.7529	30.2184	30.6829	31.5717	31.3921	32.1885	32.9313	32.9054	33.1986	34.1409	34.2033	34.4643	34.7994	34.9216	35.9371	35.7863	36.8609	36.3782	36.4878	36.7242	37.0587
	22.841	23.0061	22.2908	22.7986	23.315	23.4161	23.2817	23.3775	23.4552	23.2369	27.1024	28.2085	29.7226	32.2344	34.9687	36.4316	38.316	39.1015	40.991	41.824	43.5361	46.322	47.4333	48.8747	50.7574	52.1117	53.1834	55.4057	56.8709	58.0738	59.4702	60.8115	62.8555	63.6194	63.9078	65.5208	65.3966	66.5913	68.1	67.8041	69.9823	70.2516	70.8652	72.2211	72.9255	73.0583	73.196	74.7193	75.0699
	23.3626	24.3083	23.6975	24.0692	24.5488	24.5444	24.2105	24.024	24.0722	23.925	26.9147	27.2811	28.4445	30.2863	31.233	32.3454	34.1963	34.3584	35.3691	35.8254	36.4678	38.7457	38.8728	38.9874	39.935	40.8876	41.6515	42.2628	43.9284	43.6562	45.1171	45.4501	46.5378	46.6336	47.3673	47.5031	47.8619	48.5393	49.4456	49.2357	50.2645	50.6092	51.0408	51.5148	52.0967	52.6711	51.8076	52.4035	52.6731
	18.5843	19.1649	18.283	18.4164	18.7164	18.7546	18.7534	18.5143	18.4695	18.3656	21.1817	22.0887	22.5197	23.266	24.9403	25.6075	26.7954	27.1829	28.1197	28.9218	29.623	30.4715	31.0808	31.6706	32.5014	33.1756	33.5201	34.3821	35.0293	35.1819	36.4694	36.4324	37.1061	37.5121	38.1302	38.6543	39.2681	39.5863	40.2278	40.4064	40.9345	41.0928	41.5799	41.9005	42.4929	42.2822	42.8438	43.2246	42.5736
	14.72	15.1018	14.124	14.2921	15.0843	14.7921	14.4954	14.6805	14.5715	14.2362	16.8161	18.0021	18.09	18.8423	20.5196	21.0673	21.9311	22.135	23.4652	23.7992	24.7176	25.904	26.8024	26.1366	27.5473	28.024	28.4653	29.6046	30.2891	30.3903	30.8042	31.9555	32.5143	32.5026	32.9848	33.4993	33.9671	34.1245	35.0704	34.3871	35.0798	35.6172	35.9501	36.6344	37.0646	37.1685	37.143	37.0676	37.8384
	12.2672	12.7922	12.0046	12.899	12.4905	12.8369	12.62	12.3822	12.9442	12.656	15.6813	15.9649	16.8779	17.5281	18.5368	19.468	20.3119	21.2228	22.0037	22.1841	23.2194	23.6	24.1838	24.6673	26.005	26.0487	26.6361	27.1773	27.6662	27.8945	28.9336	29.2563	30.1525	30.5397	30.6377	30.6731	31.1254	31.6335	32.2765	31.714	32.2302	32.7647	33.3125	33.6835	34.3019	34.6276	33.8742	33.9426	34.3665
	17.3246	17.4148	16.8639	17.0465	17.1342	17.393	17.2707	17.0028	17.2798	17.0054	19.0179	19.4245	20.6301	21.3998	22.3291	22.8691	24.1952	23.9196	25.0276	25.1074	25.8001	26.8368	27.3786	27.736	28.0652	28.7112	29.7483	29.1534	30.1762	30.4154	31.0611	31.063	32.1161	32.0339	32.0772	32.5768	32.7797	32.9061	33.5029	32.6676	33.7318	33.7282	34.1955	34.8537	35.0818	34.5017	34.62	34.9531	35.1604
	16.5128	16.6987	16.6698	16.4716	17.0987	16.8974	17.2747	16.7055	16.6328	16.8378	19.754	20.1831	20.5899	22.0145	23.4591	24.3813	24.9865	25.3296	26.0836	26.7126	27.914	28.9049	29.6031	30.0173	31.0634	31.5007	32.2984	33.6574	34.2514	34.47	35.2243	35.1154	36.6566	37.03	37.5201	37.69	38.8585	38.6587	39.9713	39.2843	40.2498	40.5746	40.6672	41.2213	42.034	41.4142	42.261	41.7697	42.5701
	10.271	10.7149	10.1879	10.514	10.8875	10.3072	10.0659	10.4379	10.2859	10.4086	12.9529	13.9875	14.5542	15.2884	16.5963	17.5576	18.7668	19.4713	20.341	21.2983	21.8803	23.2206	24.168	24.1153	25.3374	26.157	26.479	27.0937	28.19	27.9584	29.2258	29.607	30.6996	30.3652	31.283	31.7519	31.4759	32.1238	32.1541	32.1905	33.049	32.9877	33.7983	34.0348	34.3081	34.6151	34.7972	34.3031	34.9036
	11.422	11.718	11.1474	11.9253	11.4843	11.396	11.5725	11.208	11.3783	11.5525	13.8604	14.4129	15.0917	16.2389	17.1166	17.824	19.068	19.5785	20.3278	20.7194	21.8241	23.127	23.0721	23.5157	24.7767	25.1599	26.095	26.6006	27.1014	26.8641	28.5421	27.8995	29.1053	29.3188	30.0084	30.5984	30.576	31.2085	31.5264	31.595	32.643	31.8932	32.9151	33.8017	33.7293	33.9495	34.0223	33.6695	34.4558
	15.1314	14.9847	14.5381	14.6737	15.0681	14.961	14.8251	14.7947	14.8359	14.8225	17.1659	17.8823	19.2814	20.4785	21.8741	22.95	24.4547	24.8032	25.847	25.815	27.3983	29.0928	29.5361	30.0823	31.1102	32.0393	32.5862	33.8048	34.689	35.1768	36.2819	36.595	37.7751	37.8394	38.9226	39.1899	39.6301	39.8718	40.6134	41.3323	41.7361	41.7515	42.0839	43.0947	43.6425	43.2673	43.4261	43.686	44.3793
	16.1466	16.2977	16.1656	16.7666	16.443	16.911	16.3607	16.5666	16.3045	16.2794	18.5325	19.2325	20.6432	21.1813	23.2245	23.7706	25.4523	25.5641	26.3808	26.7931	27.9976	28.7243	29.4916	29.5218	31.2962	31.5786	32.1298	33.0115	33.7462	34.4685	34.9981	35.3952	36.2057	36.7828	37.3948	37.4851	36.956	37.9297	38.9386	38.298	39.4517	39.8738	40.2075	40.3958	40.8647	40.1328	40.1081	41.2297	41.9765
	9.41515	9.69138	9.40448	9.73665	10.1162	10.269	10.1809	10.4565	10.0724	10.3176	13.1614	14.3373	15.9126	17.3593	19.1764	20.7868	22.3557	22.9197	24.701	25.4974	27.2139	29.301	29.9287	31.1935	32.7486	34.1192	35.6985	36.7143	38.4182	39.2314	40.4597	41.8043	43.2844	44.0189	45.9683	46.5378	47.419	48.7597	50.0472	50.4319	51.8942	52.9305	53.7039	54.377	55.8031	56.6326	57.0193	58.0219	58.3604
	15.6886	15.6462	15.1359	15.2298	15.4531	15.5539	15.3367	15.2154	15.5525	15.0112	17.7601	18.7365	19.9827	21.3524	22.4536	23.2806	24.9122	25.4487	26.354	26.7601	28.3122	29.2226	29.8904	30.9664	32.1124	32.6822	33.4975	34.0573	35.1774	35.69	36.4893	36.7699	37.8947	38.5459	39.1329	39.2161	39.7027	40.6065	40.6875	40.9617	42.2074	41.8867	42.5685	42.9629	43.5199	43.3497	42.7139	43.37	43.5998
	24.8581	25.2254	24.5696	25.4213	25.8213	25.6346	25.4367	25.5723	25.5768	25.3088	28.1558	28.6619	30.0037	31.3568	33.8507	35.2078	36.7971	37.6198	39.0295	39.7303	41.2757	43.3733	44.3998	45.7847	47.1811	48.1623	49.3193	50.6198	51.5582	52.5143	53.9143	54.2657	55.8568	56.4626	57.4353	57.6233	57.4482	58.431	59.4125	59.487	60.9121	61.0919	61.5099	62.3355	62.8209	62.3426	62.5955	62.5961	63.1387
	16.0148	16.5771	15.8131	16.2809	16.5395	16.4572	16.4328	16.6998	16.957	16.7503	19.753	20.5402	21.7243	23.2747	25.4447	26.7765	28.4934	29.291	30.3352	30.559	32.4183	34.2894	35.0839	35.8919	37.4161	38.7167	39.5614	40.3929	41.6113	42.633	43.4103	44.2608	45.2904	45.863	46.5887	46.797	46.8402	47.3133	48.1822	48.5293	48.8317	49.0819	49.3593	50.3187	50.1328	50.3029	50.082	49.94	50.5439
	13.7008	14.6068	13.8489	13.785	14.2391	13.7877	13.8959	13.8323	13.7946	13.5486	15.9969	16.8482	17.6707	19.039	20.4938	22.3603	23.4886	24.0431	25.2334	25.5277	27.2033	28.5836	28.8986	29.587	31.338	31.9417	32.395	32.9638	33.9019	34.8416	35.6181	36.1136	36.7873	37.353	37.9584	38.1958	38.7163	38.9074	39.7108	39.3451	40.5876	40.8075	41.2579	41.5672	42.0993	42.1597	42.3636	42.687	42.97
	64.559	63.3574	62.9699	61.189	61.0183	59.6376	58.833	59.2885	57.7881	56.7472	68.0009	67.8454	69.994	71.7193	72.0726	74.1999	75.5131	77.319	78.2398	79.7043	80.709	81.8836	82.7028	83.3182	83.9298	84.474	85.4245	85.6868	85.9514	86.6832	87.0742	86.1484	86.296	85.7923	85.9078	85.5895	85.8334	85.5853	85.3715	85.3284	84.6007	84.1505	82.8979	81.7829	81.6108	81.0773	79.9885	79.0768	78.4422
	64.9713	64.87	64.2879	62.592	61.7226	61.735	60.3123	60.3658	59.0985	57.494	74.0396	74.4217	75.3237	76.805	77.0305	77.8413	78.4391	79.052	79.8113	81.0593	81.4325	81.6627	81.952	82.6047	82.4938	82.5492	82.4049	82.4764	82.7918	82.6289	82.5337	81.4784	80.6929	80.4519	79.1325	79.4046	79.64	79.0033	78.9672	78.628	77.6433	76.9576	75.5233	74.9606	73.9995	73.2968	72.0812	70.5606	70.9356
	72.1381	72.3599	70.8059	69.2246	68.6135	67.6294	65.9941	66.18	64.8472	63.1845	81.7106	81.2087	81.9668	83.4757	83.8218	85.4313	85.4993	86.8364	87.5426	88.0315	88.4254	88.1315	88.6638	89.2918	88.4985	88.9144	88.2482	88.3252	88.1467	88.0646	87.9741	87.0156	85.618	85.151	83.6654	82.3451	82.1251	80.9055	79.3003	78.1211	76.692	75.505	73.8065	72.8436	72.1987	70.0816	69.4692	68.6126	67.2222
	57.7031	55.9771	55.4735	53.1618	52.7629	52.1894	49.9606	50.5381	49.3819	48.5968	66.0708	64.896	67.046	68.2278	68.8379	70.9184	70.4635	72.0602	73.1624	73.0442	74.2643	74.327	73.9892	74.7521	74.302	74.5588	73.8039	74.9846	74.2496	74.0979	74.5048	73.8838	72.5122	72.8192	71.2856	70.5719	69.8229	69.0105	68.2345	67.5694	66.7624	65.7987	64.4953	62.6441	62.8152	61.8927	60.4728	59.2096	58.255
	65.9322	64.0927	63.2056	61.3287	60.2177	58.6038	57.0526	57.0149	54.8449	54.3728	68.3759	68.2806	70.2951	72.0929	74.5679	77.1256	78.1576	80.0192	80.9771	82.1502	83.7756	85.9676	86.5185	86.9282	86.762	86.9106	88.7307	88.6778	89.2078	89.8833	89.4491	88.8048	88.3089	87.9749	87.7405	86.6603	85.5024	86.0546	85.0022	84.5412	84.0561	83.365	82.0121	80.8818	80.3761	78.3586	78.6397	76.2935	75.1937
	48.7043	48.0835	47.698	45.7995	45.6409	44.7636	44.0621	44.8831	43.851	42.671	53.64	53.0208	55.6759	56.5075	57.7476	60.1986	63.0877	64.3735	66.2086	67.7238	69.0525	69.7868	69.7845	70.9064	71.3539	72.1732	71.9192	71.4223	72.6292	72.8456	72.767	72.616	71.9679	71.8325	71.3255	69.9292	70.0605	69.7579	69.4161	69.4071	68.4747	67.3035	66.4323	65.9457	65.0148	63.9322	62.8818	62.1541	60.6238
	28.51	27.7122	27.9915	27.1838	26.7826	26.4585	26.2296	26.5921	25.959	25.3779	35.1985	35.0819	36.9329	38.8955	40.1498	42.5752	44.0546	46.5291	48.0674	50.3398	51.1597	52.7333	53.4552	55.424	55.8706	57.3282	57.8236	59.394	60.2944	61.4489	62.5601	63.0812	62.2827	63.6226	63.0079	64.191	64.7257	65.5032	64.9103	65.2618	65.2256	65.3796	64.9878	64.7942	64.6633	64.5051	64.807	63.9829	63.6573
	58.3819	57.3257	56.148	54.3473	54.1641	52.7161	51.8544	51.1752	50.0597	49.1371	63.927	65.4674	67.3895	70.7975	71.3869	73.236	74.3686	77.0102	78.8648	79.7018	80.9161	81.3508	81.6265	83.0938	83.4489	84.265	84.3498	84.9818	85.9148	85.844	86.3863	85.9819	85.5163	84.4508	84.2512	84.0544	83.2974	82.9194	82.6561	81.2602	80.5523	79.9127	78.1174	77.6903	76.452	75.0917	73.8083	72.5496	71.7499
	63.2682	62.1448	60.9592	58.949	58.1863	56.7106	55.3535	55.073	53.9129	52.6677	66.6603	68.3806	71.2885	73.4262	75.7524	77.9139	80.3842	82.3627	84.1344	86.1906	87.1498	88.361	90.268	91.2745	91.962	94.1624	94.679	96.2456	96.9914	97.7031	98.5712	99.0667	99.1223	100.47	100.123	98.7337	97.7938	97.1488	95.7857	94.9251	94.0053	93.3111	90.9369	89.9523	88.6983	87.1767	85.5109	83.9725	83.3325
	65.3503	65.0547	63.6754	61.5063	61.1126	59.9114	58.5462	58.3451	56.72	55.4651	66.5168	66.615	69.3405	71.6453	72.4901	74.7399	76.1288	78.6289	80.3758	81.6387	82.7354	84.682	85.4235	86.3538	87.3595	87.4439	88.0008	88.5303	89.7257	89.4083	89.9625	90.4956	89.8355	89.4534	88.9859	89.2467	88.9257	87.951	86.8	87.3361	85.7526	84.7498	83.9309	82.0597	81.9245	80.4071	79.5744	78.4042	77.4804
	56.428	54.955	55.0558	53.8437	53.4409	52.1387	51.0381	50.249	48.6656	46.9498	59.1827	60.0472	63.5344	66.2223	68.0388	70.8728	72.7528	75.6783	78.1598	80.1079	82.5606	84.1984	84.9385	87.1025	87.7681	89.7501	90.3357	91.4995	92.6582	92.8256	94.5619	95.5235	96.6432	96.0169	95.735	95.0564	95.4041	94.3837	94.5134	93.5046	93.5606	92.7388	91.6894	89.8991	90.0789	88.9419	87.6267	86.0886	85.6031
	80.3444	77.5817	77.0846	75.3169	75.2671	75.6047	72.8062	72.526	72.115	69.2412	78.9651	80.0739	83.8282	84.9828	87.6382	90.2304	92.4881	95.818	98.1448	99.7303	102.201	104.537	105.842	105.9	107.692	109.063	108.554	109.976	111.112	111.05	113.131	114.204	112.701	112.615	112.28	111.7	112.399	111.481	111.599	110.951	110.346	109.602	108.158	106.742	105.435	104.857	101.081	101.352	100.771
	70.1277	68.7403	67.6768	65.8936	65.8027	63.8615	62.9972	62.5162	61.0232	59.777	68.8709	68.954	70.7733	72.5286	73.0219	75.7672	77.029	78.3672	79.528	80.9005	82.2527	83.2265	83.9153	84.3942	85.5851	85.6898	86.3606	86.9517	87.5235	87.7547	88.3411	88.5952	87.8189	87.891	87.0802	87.4758	86.8923	86.5435	86.5846	86.8996	87.1937	86.5151	85.079	84.8626	84.8186	83.9648	82.969	82.1173	81.0171
	66.5896	66.4005	65.6129	64.4374	64.3929	63.4349	62.9161	62.5243	61.6627	60.8355	69.992	70.8145	73.3475	76.1721	77.0193	79.6614	81.177	83.2504	85.0218	86.7682	88.1152	89.5133	89.8293	91.784	92.7551	93.2635	93.6021	94.6975	95.7164	96.309	96.9498	97.0413	97.0666	96.8521	96.4904	96.7166	96.9997	96.4824	96.1803	95.5055	95.454	95.1043	93.9966	93.4282	92.9795	92.2697	91.7141	91.3337	90.3106
	42.3082	40.8409	39.5129	38.2595	37.3024	36.819	35.7259	35.5561	33.8759	33.6277	45.2891	46.6907	49.5874	51.5867	54.6092	56.2911	58.8035	61.8985	64.1474	65.2548	68.7705	69.8852	71.2038	72.8304	74.3956	75.1565	76.3056	78.3193	79.0382	80.3605	82.3236	83.0327	83.2269	83.5353	83.8342	84.6983	85.7316	86.0791	87.1127	87.9751	87.2625	87.191	86.1778	85.8263	86.9159	85.9757	85.5807	85.1039	83.2903
	48.8246	47.4323	47.2454	46.5898	46.419	45.8107	45.4165	45.3592	44.4634	44.1438	53.5096	53.2962	55.3475	56.9941	58.7416	60.8446	62.0865	63.4734	65.5324	67.2378	68.9252	70.0805	70.6177	73.2824	73.8955	74.8613	75.8796	77.5065	77.5824	79.2029	79.7966	80.9045	80.9359	81.3408	80.8915	81.8795	81.9832	82.3168	82.247	83.4578	83.4547	83.0384	82.0561	81.2977	82.8576	81.0317	81.7701	80.9602	80.0924
	43.6049	43.1811	42.4377	40.6063	39.8714	39.62	38.5428	38.4984	37.4817	36.6919	46.1309	45.3504	46.6082	47.5737	48.9024	50.5799	50.6005	52.2266	52.7832	54.0484	54.4984	56.2038	57.055	57.4529	58.002	58.4167	59.4488	59.1353	60.739	60.8196	61.9251	61.6281	61.6996	61.7905	61.6789	61.2225	61.8233	62.7057	62.4096	62.2605	62.0462	62.0356	60.7392	61.1283	60.5411	60.0264	58.7357	58.4544	58.2732
	29.4713	28.3585	27.5534	26.6533	26.2338	25.1201	25.3605	25.15	24.4841	22.9597	34.1307	33.8529	35.9936	36.787	38.7323	40.1495	41.6572	44.1203	45.3305	46.7184	47.9741	49.7342	50.7637	52.4014	52.9032	54.2782	54.9449	55.5258	56.7949	57.9283	59.6191	58.9833	59.6238	60.5791	59.8589	60.4971	61.5936	61.0524	60.6483	61.2703	61.7229	61.3169	60.8093	60.108	60.6086	59.7303	59.3771	58.4953	57.7467
	52.5706	51.6041	50.9646	50.235	50.8345	50.1076	49.5076	49.7616	48.0726	48.3615	57.1028	56.5673	58.6193	60.7128	62.3082	65.0301	66.252	68.1553	69.8	71.5825	72.9061	73.8339	75.2198	77.0789	77.5308	79.0424	78.7254	79.8374	81.2882	81.8883	82.7537	83.7848	83.3197	84.726	83.4128	83.9519	85.0439	83.9227	84.0759	84.6735	83.94	84.243	82.8161	82.3549	82.8159	81.5032	80.7605	81.2105	79.8202
	19.3054	18.652	18.3009	17.6838	17.2077	17.0944	16.3519	16.3524	16.1561	16.0109	24.2957	23.5053	24.6859	25.8261	27.7235	29.3094	29.8393	32.1715	33.2821	35.0779	35.8663	37.2216	38.1965	39.4009	40.7898	41.5397	42.565	42.9488	43.6664	44.5198	44.6995	45.2947	45.4317	45.4988	44.8736	45.4876	45.2552	45.698	45.6645	46.431	46.0071	46.3778	46.5789	45.9921	47.0365	46.6933	46.6035	46.5225	46.3239
	13.3501	13.1625	12.4454	12.2757	12.2983	11.7892	10.675	11.3413	10.7298	11.1883	22.0206	22.7997	25.1562	26.834	29.5267	31.8908	34.1338	37.0717	39.0589	42.7459	45.1299	47.3864	49.1941	51.1734	53.4404	55.0658	56.6797	57.2994	60.4067	60.8686	63.6392	64.3454	65.352	66.7525	67.3559	68.5288	69.8071	70.2476	71.2154	71.8928	72.3278	72.9839	72.6694	72.6836	74.4063	73.8097	74.2481	73.5417	74.0719
	56.2674	55.9671	54.7836	53.822	53.6545	52.6051	52.4114	52.268	51.0147	49.711	61.5827	62.2171	64.812	67.7007	69.7161	73.0077	74.5011	76.6922	78.4682	79.4344	81.3472	83.0027	83.566	86.7347	86.8737	88.2249	90.0765	90.9263	91.4761	92.8142	93.1763	94.0927	94.7301	94.46	94.7006	94.2955	95.461	94.4156	94.5864	94.3161	94.7249	93.9598	93.5946	93.3678	94.2114	92.1671	92.1527	92.037	91.668
	85.4155	84.4058	84.2835	82.6921	82.0622	81.4666	80.7265	80.9982	79.7841	79.1719	93.2512	93.5605	95.7053	97.5754	98.3788	101.364	101.581	104.226	105.083	106.146	107.39	107.606	108.792	110.116	109.463	110.695	110.654	111.095	111.022	111.585	113.052	111.865	111.111	110.593	110.473	110.015	111.906	110.978	109.688	110.394	108.924	109.665	107.906	107.157	107.616	106.159	105.216	104.638	104.093
	43.9269	42.9912	41.9324	40.7725	40.9829	39.9985	39.3703	39.2877	38.2871	37.7618	49.1143	50.2783	52.4856	54.9256	57.0903	60.0416	62.278	65.1733	67.2653	68.8116	70.3798	72.2133	72.7177	74.5069	74.8829	76.0096	77.2051	78.0014	79.6967	80.232	82.0777	82.8007	81.8365	82.1976	82.5724	82.739	83.6851	83.5106	84.3601	84.5657	84.1493	83.8843	83.0899	84.0051	83.8968	82.4493	82.2937	81.8425	81.3335
	78.4778	77.0777	76.1509	74.4678	74.8895	73.5928	72.5286	72.4489	71.2829	70.08	89.4013	89.8051	91.7715	93.7845	94.8707	97.3049	97.4665	100.429	100.942	103.025	103.984	104.399	104.325	106.133	105.388	106.488	106.423	107.137	108.267	108.226	109.354	108.36	107.142	107.094	107.215	107.456	107.172	107.568	106.564	106.425	105.896	104.451	103.986	102.631	103.363	101.175	101.186	99.6541	98.4468
	18.4632	18.1321	18.0777	17.323	17.2172	16.279	17.2832	17.8543	16.842	16.803	32.2174	32.3259	34.5392	36.7862	38.3693	40.5573	42.1984	45.219	46.9287	49.0809	51.9096	53.0743	54.9959	57.4212	57.7094	60.5328	61.3794	63.454	65.2717	67.1925	68.6936	69.4028	70.0168	71.6203	73.2391	73.6457	75.0108	76.3765	77.2448	79.8124	81.8831	83.8668	83.6206	85.006	85.9162	87.2714	87.4953	88.6584	89.5192
	51.5056	50.0183	49.7805	48.4792	48.7541	48.2501	47.5106	47.8369	46.6225	46.4016	59.9581	60.2953	62.4559	63.8017	65.0298	67.5077	68.6245	70.0544	70.9961	72.7702	73.3095	74.7467	74.4015	77.1736	76.5757	77.1592	77.7394	78.481	79.6086	79.9359	79.7476	80.2546	79.0656	79.5661	79.4206	78.6069	79.6799	78.4497	79.3633	78.1535	78.1351	79.0055	77.1036	76.933	76.8537	76.7373	75.3017	74.6996	74.1148
	47.0044	46.1265	45.2653	43.9337	44.3923	42.9792	42.4588	43.1886	41.9883	40.955	52.0658	52.3666	54.6495	55.9827	58.3353	60.4322	61.9585	63.0057	65.4338	66.9367	68.6727	70.7239	71.6242	72.971	73.8995	75.0454	75.3784	75.945	77.7242	79.1217	79.9828	79.5392	78.9326	80.0459	79.6764	80.7212	81.0611	81.7014	81.4208	81.8129	81.1561	81.5052	80.6155	79.7731	80.0168	79.0839	79.5815	78.8915	77.9406
	48.9428	48.6448	48.6583	46.6587	47.2592	46.6501	46.5471	46.9542	46.014	45.591	57.85	58.5646	61.3363	62.3477	64.0889	65.8214	67.0457	68.6727	70.3992	72.0124	72.8029	73.9453	74.1275	75.174	76.37	77.7203	77.9985	78.5216	79.4733	80.1022	81.0394	81.1216	81.2224	81.2208	80.4872	81.4374	81.1763	80.9051	80.8826	81.9373	82.1536	81.9088	80.0682	79.6995	80.3247	79.5844	79.3215	77.6484	78.3108
	70.6343	69.9352	69.4921	67.6439	68.4616	67.0711	66.6077	66.8205	65.3175	64.2426	75.3219	75.9045	77.2966	78.7847	79.1773	81.0275	81.5709	81.9341	82.6518	83.6464	84.6186	84.2846	84.6909	84.9936	84.9935	85.7282	85.9995	85.8114	86.2225	85.9418	86.1115	85.6977	85.3503	84.6556	83.7	83.3612	83.2783	82.7477	82.1832	81.339	82.0819	81.2542	79.8515	79.7992	79.78	78.7517	78.2199	77.5457	76.8801
	75.8062	75.134	74.162	73.7874	73.8268	72.5938	71.9993	72.8163	71.8258	70.6208	82.2091	82.849	84.3332	86.4199	88.4973	90.7395	93.0439	95.2078	97.4329	99.4739	100.037	101.789	102.82	105.466	105.775	107.981	107.531	108.834	110.407	110.131	111.488	111.851	111.358	110.086	110.292	110.943	110.783	110.647	110.674	110.74	111.061	110.81	109.889	109.671	110.252	109.708	109.237	108.659	107.02
	81.8773	81.745	81.4531	80.8434	81.9706	81.4955	80.6161	81.6074	81.3996	80.4136	90.3953	92.7682	95.7885	98.1387	100.066	103.9	105.548	107.999	109.762	112.706	114.762	116.992	117.791	120.089	121.073	122.577	123.861	125.308	127.41	128.792	130.686	132.421	132.967	133.513	134.482	134.475	137.695	137.412	137.764	139.175	138.935	140.075	139.206	139.132	140.857	140.002	139.539	138.984	137.966
	41.7869	42.025	41.976	40.8948	41.1571	41.3925	41.271	40.879	39.7999	39.3572	49.5896	49.2897	50.0919	51.714	51.9253	54.1673	54.6736	56.9268	57.3684	57.8195	59.7057	60.9069	61.1706	61.5485	61.2079	61.8942	62.4373	62.6285	63.1742	64.3151	63.1198	64.3681	63.104	63.5561	63.1259	62.7549	63.7192	63.0145	62.1089	62.6624	60.7959	61.4787	60.7482	59.4181	60.9574	59.6102	58.6891	58.5694	58.6496
	14.2208	13.4662	11.9031	10.8703	10.1705	8.96934	8.36882	7.33467	6.48004	5.45014	7.47156	7.77649	8.278	8.56736	8.00839	8.41921	9.08936	9.61534	10.7208	11.4373	12.8854	15.1296	15.591	15.1558	16.6417	17.5311	18.523	19.769	21.1981	23.1503	24.4446	25.8737	28.1101	30.1749	32.0377	33.8024	36.2749	38.2159	40.4067	43.0723	44.9393	46.3162	49.7677	51.3635	53.3643	55.6768	57.6376	59.1765	60.1827
	23.8376	23.0564	21.8491	21.1957	19.8258	19.14	18.5574	18.0417	17.6147	16.765	15.2651	15.4599	14.9143	14.9115	15.0311	15.6359	17.272	18.6195	19.0485	19.3895	18.8939	18.767	19.359	18.7565	19.4188	19.9292	21.4357	21.5023	23.1365	24.0853	24.8481	25.7343	27.3614	28.8436	30.132	32.5234	34.1458	36.1583	38.5647	40.4479	42.0444	44.5989	47.1275	49.1588	51.907	54.2333	56.8301	58.2088	60.3326
	9.00267	9.1035	8.82629	8.84883	9.02812	9.17462	9.34441	8.82489	9.42704	9.00843	10.0339	10.7589	10.3949	10.6324	10.6302	11.1606	11.3339	11.4181	12.0096	12.512	12.2905	12.4833	13.0822	12.6485	13.314	14.4391	14.1883	14.0887	15.7133	16.2856	16.2249	16.8958	17.8111	17.9261	18.839	20.8324	21.8668	23.2851	25.1183	26.2007	27.577	28.782	30.9443	32.0799	33.9879	36.2583	38.51	39.314	41.0435
	28.8492	29.0431	28.7275	27.9639	28.2753	28.4177	28.0816	28.2609	27.8241	27.3325	26.9096	27.0604	26.557	27.5645	28.0645	28.5969	29.4223	30.1029	31.5364	32.6913	33.2922	35.4828	36.6229	36.904	37.9724	39.7931	41.4684	42.3269	43.8082	45.5091	46.6695	47.5487	49.6849	50.5225	51.9108	53.5628	54.7144	56.5674	58.2811	59.0084	60.0532	60.9101	62.6605	62.5944	63.6647	64.7013	65.8964	65.8977	66.3396
	37.9947	37.7904	37.5796	36.6569	36.359	36.5406	36.9114	36.1791	35.774	35.1801	33.9703	34.419	34.7089	35.1182	35.5957	38.2215	39.4159	40.9973	42.5129	45.0371	46.5814	48.3868	50.407	51.6703	53.6052	55.4654	56.3409	57.7936	59.9441	62.4132	63.6387	64.627	66.1306	67.4209	69.0143	70.1915	71.4103	72.6433	74.316	75.1465	75.6032	76.6176	78.3779	78.3214	78.312	80.2509	80.8735	80.7508	82.3225
	33.1986	32.6834	32.0661	32.0134	32.0293	31.898	32.7463	32.46	32.1619	31.7852	31.9376	31.896	32.0749	33.0901	34.3008	35.2789	36.7498	38.1994	39.6089	41.6453	43.0167	44.7082	46.1838	47.3494	48.6014	50.6136	51.53	52.8595	53.7216	54.8795	56.1061	57.3189	58.7846	59.5418	60.8832	61.824	62.1997	62.3156	64.2147	64.8054	65.0091	66.7226	66.8489	65.7741	66.2424	67.0024	67.9201	67.3944	68.1081
	7.69661	7.2418	6.75189	6.96713	6.5129	6.75374	7.15688	7.70058	7.65959	6.95404	6.78445	6.50677	7.18236	8.35942	9.41813	10.654	13.059	14.7609	16.2484	18.0841	19.7796	22.5793	24.721	27.7721	30.0597	33.0484	36.5184	40.1268	42.3531	45.7141	48.0845	51.1246	52.7649	55.8724	58.4872	60.0902	60.9884	63.543	65.9609	68.291	68.6057	69.655	71.6396	72.2478	73.6414	75.2746	76.0076	75.03	75.7729
	17.9215	17.3208	16.5809	15.5405	15.0707	15.201	14.6216	14.8731	14.3617	13.6297	11.1967	11.152	11.6616	12.2998	12.995	14.1425	15.4216	16.6765	18.738	20.0855	21.9258	24.1627	25.7405	27.3791	29.9893	32.3345	33.9335	36.4775	39.0963	41.3541	43.6413	45.9575	47.7084	50.1408	52.5338	54.6554	56.9112	58.5217	61.4098	63.8156	65.1299	66.4881	69.2668	69.9852	71.7355	73.0635	74.2172	74.2562	75.9606
	21.3997	21.7183	21.3308	21.2006	21.173	21.0093	21.4304	21.9537	21.4287	21.1501	20.4735	21.1438	20.7628	20.6039	21.3022	21.4417	22.359	22.9132	24.1606	24.6304	24.9093	25.6419	26.6796	27.6593	28.9149	28.9705	29.9525	30.4625	32.5344	33.8018	34.3472	34.7817	35.9997	36.63	37.7611	39.608	40.3842	42.3905	44.4979	46.3649	47.4386	49.3213	51.8294	53.3409	55.6329	58.9536	61.5491	63.1506	65.8864
	18.3409	18.0714	18.2143	18.2873	18.4173	18.675	19.1406	18.4834	18.6653	18.34	18.2925	18.4014	18.0266	18.1302	18.6134	18.7435	19.3849	19.5389	20.1928	21.0711	21.0029	21.7517	22.2575	21.9844	22.7472	23.1922	23.7907	24.204	25.1635	26.552	26.8612	27.3698	28.2246	29.4156	30.5323	31.9969	33.3056	34.2405	36.2491	37.4697	38.5413	39.8738	42.322	44.0138	45.7339	47.7476	50.5558	52.2807	53.8893
	15.2609	15.1598	15.1057	15.0985	15.3931	14.9083	15.5905	15.6679	15.6237	15.3361	15.5426	16.0447	15.4586	16.2724	16.3325	16.6526	16.6179	16.7862	17.2873	17.6721	17.7585	18.5522	18.4497	18.4134	19.4207	20.0337	20.4079	20.5089	21.6089	22.4773	23.4872	24.9128	25.4618	25.7825	26.2528	27.7668	28.4491	29.6994	31.4642	32.5567	33.7641	35.467	37.6577	39.1323	40.9971	43.4536	46.0152	47.6447	49.3738
	35.1724	35.4418	34.6835	34.645	34.0891	33.2223	33.5092	33.4304	32.8635	32.3497	31.0411	31.2661	31.0141	31.592	32.0769	33.0179	33.0204	33.2628	34.0155	34.6845	35.4843	36.074	36.6739	36.7768	37.3771	38.8403	38.837	39.8002	41.4015	42.5026	43.1039	43.732	44.8466	46.047	47.3222	48.3677	49.2778	50.5365	51.9786	53.911	54.8126	56.1365	57.7676	58.906	60.1981	62.5033	63.652	64.0061	65.2324
	28.6461	29.5032	28.1154	28.3394	28.3266	28.2155	28.2393	28.658	29.139	28.0669	27.4551	28.1217	28.0578	28.5167	28.5044	28.9982	29.1841	29.6545	30.8385	31.1236	31.2128	31.7016	32.9094	32.5514	33.8501	34.3533	35.2673	36.5473	37.6006	38.2115	39.0105	40.164	41.1952	41.0187	41.736	43.6532	44.3618	45.5771	46.7936	48.5451	48.8301	50.3586	52.1124	52.8269	54.9398	56.817	59.1545	59.8464	61.2435
	22.8727	22.6667	22.6522	22.6974	22.4759	22.476	23.0472	22.7008	22.8003	22.578	21.598	22.2226	22.4666	22.8546	23.1014	23.6733	23.6902	24.1704	24.3239	24.6331	25.1014	25.6375	26.1914	26.4935	26.9872	27.8327	28.1022	28.9322	29.8479	30.5907	30.6418	31.4176	31.6351	32.5273	33.9956	34.7967	35.7654	37.0009	38.4273	39.6855	39.7454	40.9595	42.6663	42.818	43.9508	46.1482	47.3865	47.7165	48.56
	13.0856	12.9202	12.7764	13.0464	13.0138	13.6132	14.2686	13.837	13.8041	13.5633	13.4059	13.7739	13.8314	13.7631	14.348	14.5235	14.9881	14.2564	15.0232	15.3482	15.7063	15.9692	16.0943	16.3774	16.8608	17.4632	17.8715	18.3872	19.1615	20.0877	20.3015	20.8888	22.0717	22.7579	23.8111	25.5492	26.5389	28.4576	30.5163	31.8276	32.5839	35.2593	37.3466	38.613	41.173	43.6897	45.7671	48.064	49.9895
	14.9321	13.4261	12.4376	11.5772	10.7443	10.583	10.0414	9.26699	8.72155	8.21799	7.71686	7.90469	7.68366	7.62458	7.77997	7.6976	7.99206	8.02402	8.41519	8.99668	9.20058	9.4935	10.2343	10.1948	10.7639	11.4733	12.0826	12.412	13.6153	15.2373	15.8902	17.3213	18.5903	19.3077	20.728	21.9777	23.6173	25.51	28.047	29.8024	31.6219	33.8618	36.4756	38.5509	40.4095	42.9187	45.8145	47.1295	49.1196
	22.0481	22.3374	21.1331	20.4609	20.4955	20.4978	20.7746	20.1588	19.6087	18.937	19.5824	20.2701	20.0308	19.8304	20.6709	22.0092	22.87	23.445	24.8559	25.6336	26.4859	28.0153	28.8715	29.8791	31.4415	33.0649	34.3099	34.9719	36.1561	38.9773	39.584	41.4262	42.8473	44.4076	46.1073	46.9331	48.1068	49.5545	51.3758	52.0021	53.3544	54.669	56.6062	56.2696	57.0261	58.6024	60.0145	60.2662	60.4638
	29.2995	28.4127	27.7352	27.3586	27.2007	26.4185	27.1825	26.4969	26.1217	25.5566	23.9912	23.7566	23.2639	23.9048	24.9505	26.0675	27.4647	28.1078	29.3214	30.9084	31.8863	34.0517	35.7879	36.9643	38.984	41.4109	42.5865	43.9484	46.5511	48.4913	49.8716	51.9255	52.9854	54.4109	56.6272	57.6827	59.259	60.3862	62.0614	63.5235	64.2862	65.2749	66.5668	66.3397	67.4334	68.7396	69.1959	69.2173	69.163
	14.1093	14.6036	13.5198	13.7251	13.9239	13.9261	14.9069	14.563	13.9247	14.1389	15.3152	15.5454	15.1445	15.5617	16.8438	17.4286	19.0205	19.0468	20.2995	21.065	21.2191	22.9363	23.7578	23.9839	25.2714	26.7507	27.5426	28.2465	29.8178	31.4655	32.39	33.4287	35.1268	36.7015	37.639	39.4415	41.7728	43.2562	45.7741	47.9872	49.4593	51.5968	54.2095	55.7246	57.7627	60.1162	62.7355	63.755	65.5341
	37.282	37.3661	36.7021	36.9374	35.85	35.7431	36.3231	35.5779	35.4267	35.1085	33.6972	33.6266	33.74	34.9724	34.3195	35.5861	36.7	37.3949	38.2629	39.7176	40.2004	41.8727	42.6828	43.7212	44.2427	46.6394	47.9204	48.9183	50.6227	52.3358	53.8479	55.3364	56.8375	58.8379	59.4779	61.5099	63.6128	64.9852	67.3601	68.6878	70.0008	71.3858	73.6426	74.3275	75.5486	77.4142	79.0588	79.6054	80.7164
	36.2821	36.2105	35.5641	35.7042	35.4218	35.7359	35.7482	35.6936	35.3109	34.7757	34.2117	34.212	34.4282	34.336	34.9206	36.0524	36.3801	37.5004	37.819	39.2732	39.3963	41.1398	41.8095	42.0361	43.7308	45.1916	45.8374	46.977	48.3734	49.7278	50.5578	52.2795	53.4762	55.0588	56.4665	57.4187	58.9425	60.2998	62.1877	63.6856	64.2972	65.4662	67.3532	68.1725	69.6973	71.1338	72.5375	72.5117	73.4951
	17.2644	16.7172	16.0109	15.8046	16.2619	16.0972	16.5537	16.4338	15.9884	15.8261	14.7401	15.3263	15.4612	15.6206	15.7744	16.3647	17.2131	17.8225	18.416	19.5786	19.6758	21.1478	21.537	22.301	23.4458	24.9756	26.0875	27.0682	28.3179	29.7631	31.5124	32.8893	33.4064	34.0396	34.4889	35.5415	36.9063	38.2733	39.3667	41.0145	41.7471	42.8624	44.4269	45.6081	46.5483	47.5804	49.1529	49.1911	50.896
	14.5068	14.2614	14.3422	14.0149	14.4259	14.226	14.4377	14.8102	14.6656	13.9673	14.0118	13.9438	14.2691	15.2834	16.8086	17.7387	18.1252	18.9454	19.921	20.3781	21.3788	22.7706	24.5291	24.7731	25.6151	27.0048	28.3474	29.3273	30.5881	32.4956	33.7205	35.483	36.8355	38.4517	40.7041	43.1295	43.5793	46.1206	48.5685	50.5848	51.6756	54.5958	56.821	59.5907	62.1297	63.6108	66.4419	68.5052	69.8538
	10.8296	10.8052	10.4703	10.3946	10.4444	10.6071	10.4741	10.5103	10.4999	10.0807	11.2002	11.4355	11.0392	11.5847	13.0929	13.628	14.5063	14.6357	15.9831	16.8079	17.5252	18.5795	20.5604	22.2816	23.1306	23.9401	24.6408	25.0316	26.8069	28.378	28.3688	30.3773	32.4568	33.8026	37.7129	41.4921	45.569	48.7263	53.0774	56.8098	57.8761	60.7422	64.0537	67.2815	70.6196	75.6298	79.8116	84.3955	91.0903
	62.7543	61.7976	61.2148	61.108	60.8805	60.4355	61.0624	61.1474	60.576	60.4001	57.5258	57.8	57.9727	58.5456	59.4755	59.5825	60.3805	60.0211	60.9998	61.414	61.4895	63.7672	63.8384	64.7876	65.9335	67.5601	68.4325	68.3777	69.5534	70.4541	70.903	71.6273	73.273	73.9939	74.9781	76.8978	78.0123	79.5214	80.886	82.9192	84.051	85.694	88.603	89.7251	90.9901	93.4054	95.089	95.8597	97.3673
	29.0867	28.877	28.0229	27.4155	26.8352	26.5625	26.4432	25.9041	25.0204	24.3706	21.9448	21.9139	21.1407	21.1394	21.0059	20.526	20.0674	18.5503	18.9916	18.4597	18.1169	18.6209	18.1698	17.9102	18.284	18.9534	19.193	19.8259	20.4249	20.5289	21.1301	22.2568	22.8642	23.9154	25.0343	26.1257	27.8267	29.7471	31.8772	33.8566	35.9126	38.4208	40.9068	43.1486	44.9528	48.7295	51.9926	54.3872	57.4894
	21.3148	21.4676	20.3009	20.6516	20.5957	20.973	21.2937	21.2443	20.6782	20.6061	22.0287	21.9746	21.5573	22.0482	22.0339	22.7139	22.974	22.9319	23.9496	24.2556	24.3156	25.1236	25.9566	26.1386	27.0488	27.7643	28.8707	29.7733	30.557	32.3574	32.649	34.6452	36.5249	38.1456	39.9713	42.0084	44.1562	46.3285	49.9378	52.553	55.2096	58.4725	61.8004	64.2228	67.0565	71.4644	74.5643	76.5674	79.8629
	26.0322	25.6828	24.8045	25.2134	24.8756	24.2535	24.9335	25.3623	23.9314	24.1526	23.1269	23.329	23.0588	23.251	23.6388	23.5705	23.4965	23.6043	24.0268	24.5976	25.0783	25.6659	25.9468	25.9373	26.2329	27.5653	27.5301	27.6302	28.455	28.832	29.3366	29.9973	31.0483	32.2136	32.1215	33.6441	34.5704	34.8527	36.7396	38.2395	38.4285	38.9322	39.9895	40.8525	42.7599	43.6506	45.0924	45.1001	46.4202
	27.4229	27.3379	26.9997	26.6571	26.9881	26.5239	26.412	26.7034	26.1275	25.5632	24.8677	24.7018	24.6106	24.9553	25.089	25.5893	26.2918	26.4305	27.2244	27.9476	27.6767	28.9535	29.5983	29.6888	30.5353	31.4348	31.5093	32.8316	33.7163	34.1843	34.6476	35.5452	36.4857	37.8816	38.0006	39.1492	39.5923	40.9274	42.7032	43.6084	44.7067	46.0873	47.5915	48.6649	50.131	51.8723	53.77	53.8063	55.7357
	15.7765	15.4114	14.8244	14.8976	14.6591	15.0335	15.3401	15.3149	15.4839	15.3658	15.1996	15.1354	15.377	15.0168	15.2976	15.5261	15.9406	15.9929	16.4584	16.6301	17.1998	17.6684	17.047	17.1464	18.2431	19.1096	18.6995	19.3942	20.4159	20.5456	20.8952	21.9862	22.6032	23.3023	23.2839	24.8811	25.8722	26.6828	28.0583	28.8523	29.1849	30.5328	32.3328	33.8682	34.8857	36.5111	37.8014	38.1938	39.8162
[truncated: 131 more columns]

## Sheet: Panel H
NS shRNA Neurons	52.9206	51.9786	51.8106	53.7573	52.0018	51.0112	50.9746	51.6903	50.8501	51.0107	51.2924	51.0513	49.9064	50.815	51.4603	52.977	53.4685	53.9575	53.4215	54.1701	54.0953	54.5556	54.61	54.0682	53.9439	55.4735	58.2864	58.0333	58.5359	57.9133	58.3758	57.1645	57.9575	57.1287	57.5669	56.6789	57.2785	57.8557	57.0811	56.6689	56.7635	56.5326	56.0435	55.1354	55.5463	56.0986	55.3765	55.4119	54.1462
	48.3741	47.5782	47.3638	49.2873	47.6352	46.2584	46.4152	46.9399	46.1348	46.0399	46.3955	46.2702	44.8334	45.8539	46.1429	47.0492	47.7412	48.0773	47.7053	47.8897	48.501	48.1351	48.218	47.5901	47.4308	48.6288	50.2801	49.764	50.2752	49.3649	49.8255	48.9838	49.7243	48.8233	49.2072	48.6789	49.4882	49.8028	49.4547	48.6173	49.0363	48.7061	48.3483	47.625	48.0574	48.498	47.8912	47.8816	46.6226
	51.1198	49.9364	49.5511	51.635	50.0482	49.0319	49.0197	49.7608	48.8719	49.2463	49.667	49.3921	47.8281	48.8081	49.4106	50.3077	50.9492	51.3718	50.7462	51.0491	51.8195	51.4017	51.5684	50.6468	50.7445	55.286	58.0126	59.374	60.8831	60.9817	62.4245	61.968	63.1366	62.3646	62.7341	62.2082	63.0183	63.4465	62.6928	61.9747	62.1968	61.4398	60.8774	59.7633	59.7902	60.4754	59.5742	59.1574	57.5013
	54.7476	53.7804	53.5636	55.6139	53.5827	52.341	52.3408	52.8192	51.9506	52.2679	52.6554	52.1171	50.8548	51.7856	52.0187	53.1824	53.6588	54.0904	53.3562	53.9176	54.1235	53.7338	54.0004	53.2334	53.0245	54.4599	55.7618	55.2047	55.6188	54.8745	55.4852	54.2686	55.1448	54.7226	54.8457	54.3704	55.2933	55.5312	55.1042	54.568	54.8131	54.6009	54.2335	53.3638	53.9581	54.4569	53.8816	53.7737	52.3964
	50.7961	49.7623	49.6139	51.3301	49.701	48.7837	48.5439	49.5899	48.47	48.9017	49.1388	48.9143	47.6735	48.5451	48.6384	49.7639	50.3698	50.6428	49.9911	50.2263	50.6572	50.4042	50.7738	50.2217	50.0699	53.5	55.902	55.7822	56.4203	55.5063	55.9651	54.6131	55.627	54.7097	55.1352	54.4128	55.1517	55.6458	55.2363	54.5367	54.5799	54.1092	54.0876	53.0646	53.2316	53.7768	53.1999	53.0221	51.418
	50.7576	49.7236	49.4701	51.5585	49.8736	48.3222	48.2978	49.1139	48.2302	48.3002	48.9367	48.3667	47.2831	47.8612	48.4394	49.7235	50.3604	50.8959	49.8138	50.4056	50.8216	50.7937	50.6108	50.0949	49.9885	48.9802	50.7831	50.8836	51.9662	53.0289	55.3697	55.9918	57.8317	58.1956	59.6358	59.2231	60.072	60.892	60.4667	59.6385	60.348	59.8071	59.3618	58.5758	58.6577	59.1314	57.9179	58.2206	56.1647
	44.6418	43.3429	43.4492	45.0056	43.2007	42.1389	42.3268	42.7433	42.3797	42.3594	42.7851	42.445	41.2655	41.8392	42.3145	43.4123	43.7659	44.4543	43.5607	43.8884	44.3767	44.3778	44.3842	43.9779	43.7277	45.2516	46.9021	46.5547	47.1124	46.7251	47.4602	46.6822	47.7225	47.2167	47.5082	47.0545	47.7916	48.3559	47.6033	47.2282	47.4616	47.0152	47.0647	45.914	46.3618	46.7881	46.0427	46.1278	44.6679
	72.3379	70.5228	70.2523	72.7415	71.2421	69.8588	70.1787	71.1999	70.718	71.1103	71.9452	71.6934	70.1802	71.3194	72.2776	73.165	74.2842	74.9539	74.2452	74.9154	75.3904	75.2813	75.833	75.213	74.5337	84.4412	88.4532	90.3991	92.2962	92.1832	92.7427	91.2221	92.2002	90.9672	91.4174	90.4486	91.917	92.3736	91.2331	90.5198	90.9106	90.7103	90.0598	88.5859	89.1914	90.1487	89.129	88.9079	86.1398
	54.1315	53.5076	53.159	55.0399	52.8886	51.9252	51.9172	52.3279	51.3506	51.4922	52.1771	51.6061	50.3191	51.3484	51.4548	52.6547	53.2267	53.8488	52.8603	53.2907	53.5352	53.4257	53.3237	53.0946	52.8166	51.1554	53.0835	52.7057	53.5218	52.8883	53.4265	52.0492	52.7093	52.0166	52.3373	51.6024	52.2731	52.6101	51.9366	51.4711	51.5411	51.5298	51.0229	50.2221	50.5158	51.01	50.4307	50.3658	49.2503
	52.8758	51.012	50.6701	52.6065	51.0135	50.0282	50.2152	50.7088	49.7204	50.1826	50.7512	50.3567	49.0889	49.826	50.2751	51.156	52.0466	52.5627	51.6446	51.8561	52.3606	51.9469	52.3312	51.8457	51.8032	56.8796	58.6865	58.8869	59.6602	59.3253	59.7897	59.1214	60.3864	59.4973	59.8499	59.4395	60.2207	60.5767	60.0744	59.2957	59.4677	59.1807	58.8098	57.9908	57.7949	58.4102	57.6322	57.6124	55.5243
	50.0783	48.9115	48.5699	50.4448	48.5579	47.5661	47.4209	48.3458	47.7145	48.0532	48.5877	48.1033	47.4402	47.9734	48.3874	49.5418	49.9406	50.5813	50.0394	50.4187	50.6583	50.5726	50.9584	50.2832	50.2145	54.1298	58.4217	62.3468	65.3912	66.5298	68.3737	67.884	69.0929	68.2837	69.3001	68.5806	69.6501	69.8971	69.159	68.5106	68.6378	67.7566	67.2722	66.1214	66.2626	66.38	65.479	65.0251	62.8363
	65.2498	64.217	63.9198	66.3905	63.6119	62.8068	62.4746	63.2324	62.0227	62.1295	62.7106	62.609	60.9585	61.9185	62.4865	63.7033	64.5775	65.2096	64.0419	64.5694	64.5924	64.6202	64.8585	64.1963	63.9835	60.2156	61.0849	60.8464	61.581	60.6173	61.1212	60.1433	60.6685	60.175	60.7338	59.8265	60.7654	61.2488	61.0572	60.2198	60.668	60.4779	59.8918	58.9192	59.6266	60.263	59.2374	59.5586	57.9114
	61.5368	59.6744	59.2851	61.5514	59.5214	58.4322	58.5721	59.4841	58.6502	59.0727	59.708	59.3578	58.0823	58.9348	59.4879	60.7865	61.576	62.2582	61.7757	62.1625	62.6365	62.3135	63.0084	62.4168	62.0034	68.639	71.2645	72.2053	73.4372	72.4666	73.2837	72.0261	73.0452	72.3176	72.429	71.8722	72.7961	73.1751	72.4601	71.9452	72.393	71.9284	71.2901	70.4193	70.6845	71.4586	70.6294	70.2862	68.3484
	60.8493	59.8829	59.7451	61.9973	59.6345	58.2552	58.306	58.8909	57.8478	58.1179	58.6376	58.3574	56.6133	58.0218	58.3515	59.5466	60.2108	60.3547	59.8375	59.8192	60.5441	60.2941	60.6298	59.786	59.5051	58.149	59.385	59.5795	59.7064	58.7063	59.6631	58.3337	59.0011	58.0148	58.6216	58.1197	58.6079	58.9661	58.3568	57.7334	58.1154	57.6591	57.0352	56.4179	56.7927	57.4497	56.6598	56.7698	55.0344
	60.6411	59.8699	59.5183	61.5338	59.4753	58.1937	58.1544	58.6483	57.7029	57.8933	58.3388	58.0584	56.4936	57.4176	57.8258	59.0278	59.7919	60.2012	58.9796	59.7912	60.1754	59.9413	60.0763	59.3971	59.1605	57.3726	58.2446	57.7898	58.3674	57.312	57.5577	56.5369	57.0034	56.2047	56.3604	55.8393	56.3398	56.6863	56.1776	55.579	55.6936	55.4616	55.0403	54.1648	54.495	54.9575	54.3835	54.4024	52.9694
	50.4681	49.5706	49.3462	51.361	49.6158	48.229	48.6058	48.8074	47.7371	48.2239	48.7603	48.1663	46.8345	47.6582	48.1923	49.2385	50.0872	50.3368	49.3363	49.9061	50.3133	50.0432	50.0236	49.7622	49.2107	51.4711	53.055	52.6433	53.0218	52.6968	53.2468	52.25	52.898	52.457	52.9795	52.4196	53.6263	53.7983	53.5334	53.1603	53.6375	53.1781	52.9681	52.2117	52.8443	53.3996	52.9571	52.8511	51.2782
	51.0682	50.4232	49.9003	51.6473	50.0566	48.7558	48.8729	49.3383	48.6181	48.347	49.1938	48.5027	47.4739	48.1829	48.7257	49.4509	49.9787	50.2171	49.5061	50.2077	50.3101	50.1627	50.3268	49.5192	49.1587	51.8172	53.3986	52.8201	52.9301	52.124	52.7783	51.4706	52.2953	51.4357	51.5454	51.0307	51.9614	51.9854	51.5519	51.2612	51.4412	50.9804	50.4807	49.9703	50.1117	50.6208	49.8294	50.015	48.5289
	51.7903	50.9773	51.0756	52.2663	50.9462	49.7537	49.8459	50.6851	49.6105	50.3524	50.6834	49.8783	48.8043	50.0744	50.3314	51.6552	52.1682	52.2912	51.77	52.2779	52.3316	52.3396	52.1944	52.117	51.8944	51.2197	53.3583	52.8209	53.7759	52.9211	53.8881	52.5075	52.9808	52.1543	52.2015	51.79	52.216	52.671	51.8753	51.2651	51.2795	51.4962	51.0108	50.3694	50.7145	51.0833	50.2495	50.3269	49.1718
	50.3648	49.1627	48.9772	51.1042	49.2049	47.778	47.6435	48.1784	47.4806	47.4368	48.0323	47.7363	46.3671	47.3654	47.7529	48.9689	49.584	49.8745	48.9861	49.8655	49.5161	49.6662	49.8512	49.2172	48.8767	49.6061	51.5991	52.1378	52.8647	52.1073	52.5332	51.7782	52.1638	51.2807	51.7266	51.2228	52.0354	52.4331	51.8173	51.3355	51.5146	51.3732	50.9494	50.3278	50.6661	50.8086	50.5589	50.7474	48.9818
	50.7453	49.4498	49.2662	51.4938	49.2778	48.1081	47.8239	48.7457	47.8504	48.0527	48.2792	48.3404	46.8465	47.598	47.8242	49.3725	49.9638	50.2685	49.3976	49.605	49.7134	49.9062	50.213	49.5905	49.3963	51.535	54.2308	54.682	55.5668	54.9245	55.7463	54.9479	55.5535	54.7792	55.4768	54.6784	55.6964	55.9668	55.5022	54.7223	54.8955	54.53	53.9587	53.2607	53.4535	53.8572	53.2534	52.9423	51.4592
	51.5969	51.2913	51.0267	53.0578	50.7264	49.5155	49.3552	50.1669	49.212	48.768	49.4125	49.2591	47.819	49.0065	49.0801	50.358	50.7401	50.9845	49.9552	50.431	51.1039	50.8165	50.4386	50.0833	50.048	46.791	48.5582	47.9416	48.3648	47.6493	48.1329	47.3191	47.4178	46.8392	47.032	46.4954	47.295	47.709	47.3578	46.943	47.1292	46.8478	46.4936	45.9595	46.415	46.7219	46.2408	46.1846	45.1637
	56.7203	55.8309	55.8054	57.4752	55.8128	54.7759	54.2781	55.174	54.3091	54.6253	55.1378	54.8875	53.5241	54.2958	54.8957	56.2265	56.5664	57.1214	56.7271	57.4114	57.4719	57.4143	57.8309	57.1881	56.6919	60.0121	63.3394	63.5674	64.3996	63.6038	64.2678	63.0053	63.8524	63.5382	63.723	62.8454	63.7727	63.8139	63.0097	62.416	62.5095	62.5981	61.6321	60.6015	60.8232	61.212	60.234	60.23	58.4649
	52.5445	51.3973	50.987	53.2263	50.942	50.1164	50.1897	50.7064	49.7619	50.3889	50.8785	50.6013	49.4154	50.2423	50.5681	51.8331	52.5549	52.9385	52.2167	52.2968	52.7204	52.7065	52.835	52.3579	51.8073	60.7172	65.4116	65.8414	66.5699	65.9446	66.1655	64.9603	65.5043	64.9515	64.9739	64.0358	64.833	65.021	64.0544	63.1668	63.2029	62.6455	62.0718	60.7654	60.9121	61.187	60.3676	59.9684	57.9165
	54.1001	53.2487	53.2374	54.9144	53.208	52.0786	51.9948	52.8258	51.8726	51.9313	52.4568	52.2658	50.833	51.5518	52.0931	53.3733	53.9858	54.313	53.6511	54.2398	54.4375	54.3773	54.6796	54.0549	54.0635	54.2816	56.6929	57.1875	58.6065	58.0937	58.6467	57.4501	57.9152	56.9931	57.334	56.6264	57.3498	57.6736	57.3562	56.9027	56.9378	56.7711	56.0098	55.1028	55.4376	56.0219	55.1544	55.1039	53.7779
	52.9184	52.4838	52.0339	53.843	52.2706	51.3291	50.8835	51.7384	50.5965	51.1882	51.5198	50.9326	49.6894	50.6419	51.0951	52.0909	52.4453	53.1046	52.4616	52.5405	53.0517	52.9395	53.0793	52.3877	52.2568	54.0982	56.814	57.0551	57.6343	56.9039	57.7203	56.4667	56.9421	56.293	56.7201	55.9833	56.8279	57.1264	56.6658	56.1264	56.6666	55.8627	55.2955	54.8605	54.8983	55.3076	54.7737	54.5834	52.9751
	56.7941	55.7505	55.6399	58.1802	55.2634	54.0865	54.4126	55.267	54.1973	54.2323	55.183	54.5458	53.165	54.2254	54.6295	55.8623	56.5768	57.3971	56.4709	56.7721	56.9483	56.6849	57.0571	56.8488	56.6472	56.0447	57.919	57.6171	57.6693	56.3949	56.8334	55.7379	56.0938	55.3987	55.2893	54.7952	55.3408	55.4453	55.0181	54.4619	54.6319	54.273	53.775	53.1866	53.6115	54.2303	53.5545	53.7716	51.978
	52.799	51.8533	51.7183	53.2627	51.5003	50.5439	50.366	50.8739	50.2563	50.4715	51.0065	49.8545	48.6972	49.9525	49.4445	51.3871	51.7893	52.6568	51.8817	51.9501	52.6352	52.0604	52.1582	51.8395	51.5394	52.3335	53.9028	53.7003	54.266	53.4838	53.9677	52.9533	53.2831	52.5988	52.8563	52.4229	52.999	53.4281	52.6443	52.2413	52.3658	52.0207	51.7215	50.8065	51.1513	51.3032	50.8532	50.8813	49.3242
	50.7036	49.591	49.5069	51.3579	49.4799	48.1033	48.2151	48.9759	48.1533	48.4252	48.9139	48.6729	47.3077	48.0937	48.4227	49.7013	50.1653	50.7387	49.9281	50.4146	50.8312	50.5987	50.7833	50.4624	50.111	52.5284	53.2937	53.3959	54.0884	53.7688	55.3033	54.5876	55.4589	55.224	55.7275	55.426	56.0647	56.5731	56.2103	55.6472	55.7687	55.5115	54.9882	54.533	54.5479	55.023	54.4531	54.2582	52.951
	52.0214	50.9895	51.0156	52.6598	50.721	49.5829	49.0072	50.0011	49.0838	49.3934	49.5808	49.1073	47.646	48.7387	48.8338	49.9002	50.6938	51.4138	50.1578	50.6435	51.1171	50.6255	51.0291	50.5104	50.0942	51.7233	53.2091	53.2636	53.0672	52.5695	53.1344	52.0407	52.6743	52.1905	52.3097	51.6542	52.7528	52.8684	52.7656	51.895	52.2956	51.7225	51.3864	50.8143	51.1677	51.514	50.7848	50.9319	49.6721
	52.6647	52.023	51.7398	53.6788	51.6992	50.5943	50.4343	51.1445	50.2227	50.3675	51.1354	50.667	49.0297	49.9698	50.0381	51.4768	52.1393	52.6172	51.7307	52.1179	52.5061	52.3264	52.4924	52.207	51.8332	49.5394	49.6406	50.2045	51.0239	50.3057	50.9598	50.4037	50.8346	50.549	51.1304	50.6657	51.6235	52.1286	51.778	51.1755	51.502	51.2492	50.8743	50.1338	50.4969	51.0286	50.708	50.6428	49.2505
	50.9699	49.6319	49.5004	51.4915	49.7289	48.6055	48.3398	48.9174	48.2636	48.1999	48.6455	48.3384	47.1315	48.0186	48.1806	49.0347	50	50.1678	49.5158	49.9278	50.4336	50.0116	50.2952	49.7032	49.2632	49.1826	53.4308	55.1719	56.81	57.2894	58.5454	58.201	59.5049	58.6889	59.4617	58.8241	59.6487	59.7856	59.2515	58.2199	58.1213	57.7115	56.9786	56.0168	55.7935	56.2462	55.2046	55.3341	53.5613
	51.5524	50.6203	50.3043	52.0598	50.0797	48.9087	49.1035	49.2331	48.6844	48.7562	49.2912	48.9741	47.3718	48.1145	48.7665	49.4589	50.3643	50.4483	49.8982	50.0747	50.6489	50.2912	50.4827	49.6666	49.3898	50.4132	53.3693	53.4719	53.7497	52.9842	53.2047	52.1497	53.2324	52.2935	52.3674	51.7355	52.5893	52.835	52.0207	51.5349	51.8677	51.4585	51.0392	50.1599	50.7114	51.08	50.4358	50.3019	49.1243
	47.2486	46.5319	46.2374	47.9057	45.934	44.8728	44.8039	45.2894	44.6123	44.6766	45.0716	44.8304	43.4942	44.1765	44.7057	45.6221	46.2257	46.6848	45.9506	46.485	46.5541	46.4803	46.4197	46.4044	46.0437	45.6895	46.743	46.3167	47.1494	46.6704	47.446	46.4549	47.4029	46.7384	47.1984	46.7211	47.4849	48.2466	47.6322	47.3481	47.3269	47.1454	46.5237	46.088	46.1377	46.3955	45.9209	45.6175	44.399
	60.7162	59.8479	59.799	62.0872	59.6209	58.0248	58.0362	58.5738	57.5127	57.6362	58.3299	57.4939	55.9395	57.034	57.7496	58.3863	59.3619	59.9087	58.6711	59.478	59.7832	59.2589	59.7192	59.1298	58.5238	54.9765	56.0324	55.2019	56.0111	55.2741	55.8686	54.7598	55.7914	55.165	55.7944	55.0704	56.0811	56.8332	56.3693	56.0105	56.086	55.9296	55.6553	55.3286	55.7089	56.0314	55.3883	55.5001	54.3463
	49.7789	49.3865	49.3654	50.9496	48.6867	48.1323	48.0896	48.2104	47.7285	47.9498	48.1124	47.6601	46.5241	47.0723	47.2531	48.824	49.1755	49.7541	49.1191	49.0316	49.6149	49.1151	49.5652	48.8885	48.7701	47.0159	48.8226	48.4236	49.1022	48.1575	48.8274	47.657	48.2968	47.1323	47.8583	47.4787	48.0901	48.2374	47.8825	47.6358	47.6956	47.7956	47.0357	46.8003	47.044	47.3085	46.717	46.8374	45.8726
	61.6549	61.0448	60.5819	62.9961	60.515	59.0464	59.1571	60.0282	58.9033	59.227	59.694	59.192	57.9097	58.9964	59.4737	60.6365	61.0605	61.8509	60.8418	61.194	61.7199	61.433	61.5773	61.2679	60.9749	61.4355	62.9314	62.2684	62.9169	62.0243	62.5275	61.479	62.0679	61.3915	61.6377	61.3754	62.1946	62.4781	62.0923	61.8659	62.1956	61.9931	61.4537	60.6943	61.452	61.5489	60.902	61.3415	59.7982
	62.8048	62.1433	61.8219	63.6716	61.5863	60.5234	60.1976	60.8866	59.8576	60.1653	60.3193	59.6779	58.4353	59.1366	59.6402	60.9833	61.5124	62.0476	61.3823	61.9236	62.1132	61.7988	62.1103	61.4318	61.235	61.2404	64.1788	66.4881	68.7767	68.9765	69.6204	68.1825	68.9777	68.0383	68.0471	67.5963	68.1447	68.4123	68.0471	67.3251	67.3436	67.124	66.8278	65.8284	66.4237	66.4842	65.6168	65.8443	63.9847
	53.1581	49.0663	48.637	48.3053	46.3942	45.8529	46.0501	47.2184	47.2388	46.7076	46.504	46.8133	46.5625	48.1117	47.4709	47.3636	48.0206	48.0697	48.5502	48.7445	48.7974	48.5189	48.5122	48.6926	48.7448	75.5349	64.3186	63.9301	63.1945	63.5015	63.2615	63.5619	62.6915	62.2693	61.4679	60.5651	60.9186	59.715	60.2107	60.6632	60.3694	60.4068	59.7048	59.7789	59.8043	58.8931	59.3206	59.6468	58.7143
	55.3988	50.9639	50.372	49.7968	48.1391	47.3002	47.3818	48.8558	48.7573	47.8876	47.9992	48.0922	48.0025	48.9063	49.0115	48.9596	49.7235	49.4064	50.1158	50.0706	50.2475	50.0146	50.2212	50.4056	50.5127	67.9013	54.2288	54.3244	55.2678	55.6312	56.0814	56.7324	56.4194	56.6647	56.7124	55.9768	56.0247	55.5349	56.2936	56.7509	56.5998	57.045	56.4589	56.477	56.484	55.919	56.2075	56.5579	55.8988
	61.4316	57.0626	56.1468	55.4966	53.8259	53.0189	53.4174	54.5645	54.3346	53.4373	53.8342	53.788	53.7355	54.2926	54.4915	54.6612	54.8846	55.0521	55.9811	55.9807	55.8267	55.5396	55.8637	55.6642	55.9092	77.1697	67.5045	67.2834	68.5679	69.0118	69.2878	69.8752	69.452	69.2962	68.9257	67.9907	67.7392	66.8635	68.051	68.29	68.1905	68.362	67.5276	67.2782	67.4983	66.7139	67.0411	67.0988	66.3454
	58.6759	53.9276	52.9821	52.538	50.8867	49.9274	49.8173	51.2845	51.2382	50.0716	50.1516	50.2777	50.0716	51.3401	51.1958	51.0703	51.5398	51.4545	52.3448	52.3896	52.1923	52.114	52.3505	52.113	52.3101	69.9705	58.9762	60.0208	61.493	63.2287	64.7432	66.4882	66.8178	67.2893	67.3834	67.7099	67.5225	66.7304	67.6229	67.8537	67.6796	67.4301	67.187	66.6393	66.1208	65.398	65.511	65.3649	64.2848
	60.2388	55.1746	54.4609	53.5968	51.9775	50.9699	51.0289	52.0835	52.3759	51.1753	50.923	51.3288	51.1264	51.9912	51.7942	52.0791	52.6499	52.512	53.2028	52.965	53.3481	52.8746	53.0103	52.7958	53.0258	74.3629	62.7298	63.6196	64.3607	65.4861	66.6673	68.0253	68.029	69.1722	69.8949	69.4091	70.0117	69.542	70.5628	70.9501	70.9623	70.9155	70.8514	70.4802	70.7824	69.7092	69.8471	69.7879	69.0878
	55.6346	51.215	51.0444	50.4204	48.9719	48.2796	48.7922	50.2924	49.896	49.2033	49.3493	49.5735	49.5577	50.5536	50.5782	50.4784	51.1523	50.9061	51.8566	51.8605	51.7418	51.4081	51.523	51.0305	51.1682	68.3572	55.6871	56.4649	57.5151	58.0515	58.4074	59.2185	59.2321	59.1285	58.9354	58.5877	58.4971	58.0121	59.1119	59.7565	59.6294	60.1276	59.976	60.0633	60.4137	59.6114	60.1731	60.2635	59.5598
	51.4713	47.2823	46.5739	46.2257	44.5331	43.9379	44.2124	45.3403	45.3107	44.5253	44.4809	44.8944	44.9079	45.6577	45.778	45.7248	46.2382	45.9674	46.773	46.9448	46.9358	46.7591	46.9747	46.9352	46.9088	66.2509	55.7302	56.2004	56.8948	57.4577	57.9044	58.853	58.7546	58.7673	58.5473	57.9861	57.8587	57.0222	58.0668	58.3105	58.1278	57.8721	57.5121	57.3493	57.6001	56.8807	56.9307	57.3063	56.124
	52.008	47.7092	47.2149	46.8312	45.4151	44.8911	45.3014	46.4735	46.4803	45.7141	45.8586	46.2952	46.2472	47.4471	47.1468	47.3367	47.6826	47.7528	48.6876	48.6744	48.7084	48.3344	48.839	48.5634	48.4631	68.5106	57.3651	57.9261	58.9268	59.9419	60.6257	61.6388	61.7088	61.8124	61.8883	61.4407	61.421	60.4727	61.372	62.0596	61.8195	62.6122	61.9169	62.1097	61.9565	61.1912	61.466	61.6353	60.7336
	53.3814	49.4004	49.0566	48.1462	46.8798	46.0586	46.2807	47.3652	47.0859	46.414	46.5657	46.7349	46.5301	47.701	47.918	48.0015	48.1997	48.3106	48.7005	49.045	49.375	48.7789	48.8317	48.777	48.9193	69.1168	58.8636	60.6794	65.1318	69.4632	74.6275	80.717	85.0675	87.423	88.2647	87.4987	87.1905	85.2146	85.2222	84.4509	83.0831	82.0595	80.3231	79.071	78.0238	76.5438	75.7714	75.092	73.0727
	95.3284	88.0738	87.3182	86.2585	84.0333	82.4857	82.9566	84.3294	84.341	82.6041	82.8589	83.3023	83.0202	84.2771	84.5323	84.4884	85.3996	84.969	86.1369	86.2632	86.4386	85.6381	86.1338	85.7198	86.0443	94.579	85.6482	88.9077	93.2179	97.6898	103.365	108.426	110.731	111.579	112.004	109.919	108.921	105.93	105.838	104.764	103.189	101.318	99.4683	98.1913	96.7888	94.5608	93.9552	93.2247	90.9019
	54.4042	49.9231	49.4393	48.6722	47.1269	46.3677	46.8383	47.745	47.7408	46.8083	46.9397	47.2343	47.1401	47.9372	48.0737	47.9087	48.4982	48.1522	49.1296	49.2525	49.2759	48.9828	49.2178	48.7579	49.091	69.8414	59.8844	60.7795	62.3912	63.755	65.6971	67.1187	66.7074	67.0014	66.7828	65.7458	65.3831	64.2191	64.8443	65.0975	64.566	64.4548	63.8848	63.6711	63.5916	62.5762	62.6814	62.8601	61.697
	50.6433	46.6586	46.0569	45.3914	44.1291	43.2074	43.3091	44.5374	44.464	43.6413	43.5718	44.0618	44.2135	44.813	44.7286	44.6243	45.1891	44.9419	46.0351	45.9648	46.0132	45.633	45.5473	45.7524	45.7946	62.6575	51.6214	52.5797	53.3158	54.0118	54.6541	56.0654	55.7612	56.5277	56.1774	55.8484	55.3846	54.7673	55.5975	55.153	55.0408	55.4213	54.7212	54.2759	54.1138	53.713	53.9194	53.9989	53.0386
	51.3687	47.3578	46.4427	46.1613	44.4882	43.7736	44.0537	45.3346	45.302	44.4436	44.274	44.7417	44.5884	45.4613	45.4299	45.5541	46.099	46.0349	46.6705	46.7662	46.9373	46.6217	46.9038	46.6208	46.9309	67.0517	56.9589	58.6764	60.7125	62.3133	64.2307	65.4261	65.3817	65.0347	64.7973	64.666	64.3703	63.2492	63.8983	64.3225	63.7418	63.2892	62.1424	61.2418	61.0175	60.4677	59.9867	60.1793	58.6501
	52.0337	48.1272	47.7218	47.0886	45.785	45.1237	45.3243	46.5144	46.3173	45.7231	45.5314	45.7879	45.8255	47.0458	46.7914	46.8281	47.5159	47.2384	48.2603	48.2182	48.3236	47.9944	48.2091	47.9833	48.0326	69.0346	59.5292	59.6269	59.551	60.0501	60.1005	60.2632	59.8249	59.6992	59.3045	58.6061	58.639	57.5805	58.4476	58.8607	59.081	58.8407	58.0403	58.2886	58.7344	58.0795	58.2503	58.6586	57.8274
	55.8464	51.5912	50.9265	50.3644	48.8838	48.2591	48.5415	49.664	49.452	48.8954	48.8504	48.8879	49.1996	49.7704	49.9374	50.0614	50.5175	50.4053	51.0979	51.4404	51.4749	51.4311	51.5214	51.2707	51.4797	70.7979	60.2014	60.5047	60.974	61.3427	61.6206	62.2666	61.7856	61.6503	60.8408	60.0755	60.1512	59.0919	59.818	59.8479	59.9848	60.0152	59.172	59.2938	59.2213	58.6924	58.9615	59.2537	58.4735
	59.2777	54.7223	54.2754	53.5987	51.9888	51.2154	51.2992	52.8447	52.4417	51.7083	51.8004	51.876	51.8773	52.6101	52.821	52.7989	53.3546	53.0645	53.9855	54.0134	53.7243	53.8755	53.8971	53.5804	53.8553	75.87	63.9822	66.2863	68.7016	70.6784	72.4859	74.8112	75.7925	76.3546	76.0177	75.7699	75.5615	74.0854	74.4619	74.6006	73.8739	73.4679	72.671	72.1916	71.6066	70.364	70.3546	70.0647	68.7001
	56.0171	51.0951	50.4213	50.3468	48.4192	47.7239	48.1966	49.3234	49.1046	47.9938	48.3104	48.4521	48.407	49.5224	48.9758	48.8818	49.6788	49.1993	50.0553	50.3763	50.7898	50.1001	50.2401	49.9773	49.9584	73.448	62.9748	66.1224	70.3802	74.3959	77.5149	79.7736	79.9266	79.8564	80.1068	79.8027	79.3135	77.5014	78.5214	78.4482	78.0794	77.8857	76.0292	75.7385	75.6037	74.2151	73.6806	73.1417	71.5879
	60.2151	55.2039	54.6296	54.0469	52.8085	51.8712	52.4	53.4118	53.5154	52.4568	52.4954	52.7332	53.1367	54.4708	54.1686	54.241	55.0263	54.3782	55.4058	55.8989	55.8971	55.5479	55.9227	55.2924	55.5863	72.6688	60.0711	60.6327	61.6138	62.4932	63.2903	66.2298	67.0408	67.1822	66.8626	66.098	65.9658	64.8082	65.5653	66.1038	65.9066	66.2273	65.4269	65.6189	65.2403	64.6862	64.3443	64.9376	63.7999
	80.3969	74.4981	73.8736	73.0502	71.0556	69.8939	70.6122	71.8037	71.5129	70.6508	70.584	70.8199	70.8574	72.4122	71.7063	71.9138	72.5734	71.9844	73.2746	73.4272	73.3556	72.8384	73.1373	72.9617	73.1012	83.2516	72.9108	74.8002	77.1042	80.0336	82.2434	84.737	85.807	87.0115	87.9835	88.3929	89.4675	88.6926	89.9489	90.8397	90.1159	89.7615	88.8182	88.3307	87.7734	86.872	86.2253	86.4712	84.4366
	114.824	107.435	106.279	105.486	102.278	100.352	101.162	103.252	103.542	102.199	102.886	104.006	104.508	105.556	106.289	106.306	107.022	107.07	109.528	110.688	111.598	111.528	112.594	113.05	112.895	106.747	102.928	120.806	140.476	159.573	174.005	186.606	192.679	196.615	198.819	200.742	203.935	203.283	209.706	212.198	214.109	214.692	213.921	214.547	216.116	215.535	217.138	217.909	215.868
	57.0152	52.5798	52.0972	51.5544	50.1465	49.1795	49.5354	50.713	50.603	49.8652	50.0171	50.2992	50.3423	51.2836	51.31	51.2408	51.9826	51.6797	52.8386	52.9311	53.0189	52.6838	52.9507	52.9245	52.8511	70.8152	60.6393	61.9267	64.1281	66.0138	67.4755	68.6276	68.5022	68.8156	68.69	68.2622	68.0842	67.1858	68.2073	68.5942	68.5884	69.1635	68.027	68.1353	68.0661	67.2593	67.7498	67.5463	66.5429
	57.0254	52.5511	51.9237	51.7499	49.8508	49.3603	49.7011	50.7446	50.7017	49.9672	50.1125	50.1698	50.2883	51.1568	51.1345	51.3151	51.6996	51.3768	52.3477	52.4954	52.7809	52.212	52.5684	52.4092	52.4262	73.1383	61.9732	62.342	63.3744	63.9278	63.769	64.4061	64.1613	64.0073	63.4459	63.5161	63.1521	62.0872	63.3165	63.5804	63.3786	63.6767	63.1355	63.0808	63.5402	62.7559	63.0505	63.0729	62.3389
	80.4837	75.0866	74.5359	74.0522	72.2709	71.4562	71.9555	73.3176	73.4115	72.5186	72.558	72.9113	73.1757	74.1295	74.5287	74.4543	75.0833	74.764	76.2276	76.3532	76.4541	76.1269	76.3766	75.8969	75.9777	93.1791	83.1579	83.3642	83.7821	84.3615	84.6762	85.6965	85.5438	86.0701	86.1187	85.7299	86.1272	85.3827	87.1053	88.1052	88.2941	88.5304	88.5159	89.0494	89.4203	88.9664	89.9195	90.6899	90.084
	72.4244	66.7977	66.1545	65.7823	63.5833	62.8361	62.8584	64.4302	64.7126	63.7362	63.7302	63.8437	64.2051	65.9331	65.4983	66.1079	66.5476	65.9435	67.3431	67.8563	67.2114	67.4195	67.4879	67.2211	67.2909	94.032	93.3366	105	116.355	126.195	133.346	137.812	135.548	132.892	126.214	119.524	116.997	114.115	113.176	112.479	111.391	110.444	108.689	108.031	106.607	104.471	104.412	103.709	101.308
	58.4653	53.6667	52.8886	52.5808	50.6082	50.1918	50.4624	51.4987	51.3309	50.8969	50.9207	51.1311	51.32	52.226	52.2748	52.577	52.9945	52.5868	53.828	53.7531	54.0016	53.6549	53.9825	53.5441	53.7606	67.8144	59.7315	61.5277	64.2017	68.7274	73.185	78.8567	82.8823	86.6238	88.9927	89.7491	89.9362	88.6801	89.3712	88.8143	87.8239	87.2537	85.8479	84.6894	83.812	82.2167	81.5039	81.3144	79.2286
	61.9345	57.1313	56.6015	56.0253	54.8712	53.9341	54.1301	55.3118	55.4156	54.6607	54.7066	55.1013	55.0479	55.7682	56.4383	57.0892	57.9019	57.5504	58.382	58.8232	59.1239	58.8039	58.982	59.4095	59.0127	78.3782	69.1	70.281	72.1471	73.3214	74.8347	78.2111	80.1324	81.1306	82.3564	82.3104	83.0282	82.9518	84.1545	84.3269	84.15	83.8522	83.2364	83.8695	83.3729	82.789	83.1994	84.0718	82.7951
	56.8383	52.6153	52.1057	51.9479	50.383	49.9165	50.2685	51.1811	51.1797	50.6179	50.3979	50.7593	50.725	51.2013	51.4277	51.6973	52.3441	51.9603	53.1673	53.2293	53.2952	52.988	53.3795	53.0966	53.1391	74.525	66.2211	66.7505	67.6021	68.3744	69.0901	70.738	71.5886	72.5892	73.3772	73.9646	75.085	75.3372	77.2737	78.2963	78.3911	78.9063	78.5512	78.6648	78.7969	78.034	78.7719	79.0509	78.0512
	52.5361	48.3582	47.8292	47.1054	45.7295	45.3431	45.8542	46.4928	46.6295	45.9017	45.8928	46.1169	46.3316	47.1865	46.8934	46.9668	47.8346	47.5419	48.321	48.0725	48.4915	48.5033	48.45	48.4087	48.4541	67.9044	58.5221	59.7644	61.3051	62.2302	63.2371	64.6999	64.9369	65.4174	65.488	64.6427	64.4576	63.6472	64.4038	64.788	64.2439	64.3366	63.621	63.4178	63.1519	62.6958	62.4368	62.6444	61.4358
	67.8003	62.591	62.39	60.9355	59.6339	58.5138	58.994	61.0223	60.3231	59.7074	59.9064	59.9142	60.2353	61.5613	61.3774	61.412	62.0887	61.7323	62.9753	62.9266	63.2372	63.0567	63.5626	63.0357	63.4292	77.835	66.7627	68.2608	70.5345	71.8999	73.5221	76.1543	76.1942	76.9313	77.2656	76.5315	77.0719	75.9201	77.3933	78.2284	78.3306	78.6096	78.166	76.9933	77.5585	76.6381	76.9253	77.6256	76.4084
	56.7811	52.3554	51.2531	50.6761	48.8477	48.4216	48.4167	50.1834	49.9798	49.0648	49.2059	48.8414	48.9432	51.7899	50.2159	50.3635	50.6984	50.7198	51.2211	51.4763	51.6253	51.3762	51.5373	51.3021	51.9332	65.3351	52.5397	52.6551	53.3885	54.0643	54.9771	55.9635	55.8533	56.1769	55.9066	55.7185	56.0851	55.0747	56.0884	56.5262	56.431	56.648	56.075	56.0716	56.1837	55.7746	56.0884	56.3787	55.0717
	68.8986	63.5775	63.5875	63.9098	61.6276	61.3385	61.1472	62.9819	62.7668	62.0423	61.1772	61.8062	61.3333	65.0677	62.9655	62.9657	63.773	63.2623	63.6729	64.0639	64.1183	63.8043	64.003	63.775	63.6463	84.8379	65.8499	66.2376	67.9658	69.2867	70.1853	71.1424	71.9532	71.5798	71.6561	71.1221	71.4127	70.6499	71.4515	72.0712	72.1328	72.6426	72.2924	72.649	72.5169	71.7172	71.988	72.3558	71.443
	60.0683	55.183	54.6134	54.3119	52.519	51.6487	52.1957	53.2979	53.2999	52.2097	52.3143	52.6636	52.5245	54.0402	54.0267	53.8812	54.611	54.3627	55.2201	55.5181	55.5123	55.1614	55.5518	55.453	55.523	72.0652	59.1683	59.3908	60.6585	61.4012	61.9351	63.1835	62.8929	62.7531	62.2689	61.421	61.3859	60.6816	61.6312	62.0605	62.2828	62.5778	62.3521	62.5934	62.8791	62.1555	62.4943	62.951	62.2968
	59.3281	54.6849	53.8198	53.4213	51.5675	50.6951	51.1316	52.2549	52.3023	51.3255	51.4895	51.7248	51.6576	52.5954	52.5336	52.5882	53.1405	52.9648	53.5893	53.6888	53.7394	53.7313	54.0586	53.5709	53.743	73.3574	61.5744	62.6664	64.3178	66.196	68.8535	72.3862	73.9373	75.8702	77.3024	77.6354	78.0459	77.3206	78.667	79.2457	79.2761	79.5954	79.0999	79.1066	78.56	77.6187	77.2857	77.3578	76.0623
	86.2589	79.7511	79.5765	78.1792	75.7113	74.6086	78.1324	83.8313	87.6735	90.015	93.1593	96.1337	99.1534	101.544	103.8	105.206	107.316	108.794	111.082	111.605	111.698	110.728	110.619	110.525	109.445	105.599	105.671	128.634	146.011	157.983	165.727	173.282	177.032	181.203	182.455	182.527	185.245	183.893	187.84	191.184	191.712	193.054	191.551	193.747	192.23	190.737	191.824	194.602	191.316
	53.7918	54.847	53.9004	52.7204	52.9596	51.9032	52.2648	52.859	52.5596	52.5735	52.1267	52.3385	52.6472	51.8922	52.1886	52.1338	52.5773	52.2288	52.2885	52.1154	52.221	52.2083	52.6099	52.3951	52.105	77.6459	65.1367	65.3785	66.4934	67.2384	67.9379	69.8062	72.4849	75.0621	79.1014	84.0825	89.1885	92.3091	95.0743	97.9156	100.966	103.527	105.913	107.032	107.796	108.865	109.96	110.685	110.485
	63.1644	64.4867	63.8364	62.2072	62.5735	61.4922	61.7862	62.5418	62.1659	62.1665	61.9224	62.0682	62.112	61.524	61.8967	62.2121	62.2838	62.0125	61.3556	61.6801	61.6194	61.3574	61.6644	61.4579	61.4328	87.3481	74.7642	77.3479	80.8251	84.4114	88.3572	92.559	97.9695	104.464	110.799	117.109	122.84	128.847	133.972	138.669	142.784	147.42	149.901	151.96	153.447	155.892	156.984	157.341	157.58
	60.8926	61.8389	60.912	59.6542	59.6469	58.6312	58.879	59.2707	59.3078	59.1876	59.046	59.2568	58.9948	58.5837	58.9149	58.7825	59.4596	59.1806	58.7687	58.8215	58.8822	58.7183	58.9246	58.8302	58.7754	88.0075	73.817	74.0594	75.7451	77.4795	78.1948	79.0102	80.1837	81.8579	82.771	83.9468	84.8874	85.8712	86.3991	86.7536	87.2374	87.9665	87.8455	87.3838	87.1302	86.8813	86.8242	87.1023	86.6103
	72.5873	73.2991	72.3583	71.0845	70.9137	69.8237	69.9893	70.3166	70.3751	70.4431	70.3776	70.4667	69.8185	69.6119	70.0105	70.0523	70.5139	69.9514	69.5435	69.4082	69.7883	69.3443	69.6374	69.6714	69.5046	90.0192	75.3495	76.7361	78.5218	80.2471	82.1538	83.9238	86.2752	88.772	91.0766	93.1237	95.0925	96.932	98.4606	99.4382	100.689	102.101	102.496	102.542	102.942	102.945	103.425	103.27	102.585
	67.2844	67.974	67.1524	65.722	65.9116	64.7152	64.9709	65.2046	65.1822	65.4304	65.2513	65.2426	65.1866	64.8655	65.0052	65.1773	65.1982	65.1907	64.6797	64.6427	64.6774	64.6725	65.1185	65.2644	65.0907	88.5715	78.3901	88.486	100.535	112.883	127.154	140.155	150.881	160.667	167.961	171.958	177.573	182.327	190.598	193.972	198.737	204.739	210.144	213.746	218.047	222.067	224.722	227.671	228.98
	61.4617	62.1236	61.4301	60.0134	60.1254	59.1669	59.4019	59.5449	59.5975	59.8495	59.4683	59.4979	59.2234	58.8913	59.2368	59.1002	59.983	59.3749	58.9756	59.0587	59.0463	59.0094	59.301	59.1612	58.9776	94.6834	81.2874	81.9451	83.2038	84.9014	85.9753	87.1888	89.2472	91.3621	92.5785	94.4135	95.6861	96.8873	98.4755	99.2618	100.388	101.878	102.272	102.35	102.831	103.517	103.633	104.396	103.89
	69.2967	70.2839	69.2534	67.8214	67.8795	66.6921	66.9095	67.3131	67.1541	67.1509	66.9623	67.0446	66.7292	66.4088	66.6977	66.6641	66.9332	66.8227	66.5066	66.6632	66.7306	66.2393	66.6506	66.758	66.4423	96.8951	82.6756	84.2906	86.6245	88.8413	90.5274	92.6283	94.7477	97.3069	99.0257	100.594	102.075	102.924	103.824	104.143	104.401	105.747	105.34	105.014	104.63	104.249	104.147	103.962	102.762
	64.5528	65.3777	64.8494	62.9663	63.4831	62.5455	62.2552	63.1632	63.0392	62.8097	62.7672	62.9836	63.162	62.5665	62.6684	62.821	63.3596	63.2787	62.5744	62.9666	63.1435	63.0171	63.0891	63.3182	62.9753	87.1066	71.3179	74.2343	78.0517	83.1513	88.7277	93.9375	100.471	107.475	113.014	118.524	123.499	127.586	131.579	134.504	138.216	139.823	140.037	140.248	139.212	138.339	136.784	135.479	132.957
	58.9826	59.5778	58.8872	57.5059	57.6456	56.7175	56.8058	57.2617	57.0915	57.1659	56.8287	56.9493	56.7337	56.5882	56.6793	56.7711	57.0883	56.8625	56.473	56.5381	56.7501	56.6967	56.8174	56.8652	57.088	81.8267	67.7261	69.2078	71.0996	73.6289	77.3629	81.489	85.7002	89.1884	92.1898	95.4685	98.0678	100.44	102.63	103.729	105.137	106.555	107.406	107.43	107.861	107.813	107.65	107.282	105.778
	71.2113	72.0386	71.1124	69.8624	69.6491	68.8506	68.9415	69.3073	68.9777	68.9528	68.6587	68.9667	68.7837	68.1935	68.8987	68.7716	69.0299	68.6119	68.2444	68.5557	68.3505	68.1805	68.144	68.1481	68.3154	97.8886	84.543	85.7132	87.5939	89.3966	91.6675	94.2855	97.5729	100.529	103.42	105.886	108.138	110.248	112.728	113.86	115.287	116.869	117.603	118.051	118.794	119.143	119.283	119.925	119.623
	58.0295	58.7277	57.7187	56.5902	56.6369	55.6997	56.0162	56.3372	56.1232	56.1679	55.9017	56.0305	55.7302	55.2585	55.7095	55.8416	56.1404	55.6421	55.3723	55.4884	55.329	55.1906	55.4264	55.4004	55.4122	82.8863	70.0108	71.0243	72.5772	74.2928	75.4057	76.848	78.5262	80.3341	81.7652	84.0191	86.2216	88.0962	89.2933	90.4253	91.1312	91.7009	91.8498	91.4994	91.2376	91.1224	91.1036	90.8906	90.0613
	62.6366	63.4016	62.6756	61.1296	61.2189	59.9203	60.2608	60.5188	60.6597	60.7627	60.3878	60.5033	60.3648	59.8792	60.3477	60.0837	60.4716	60.1358	60.0655	60.1192	60.351	60.1141	60.1922	60.1699	60.1125	81.9929	66.7281	68.6652	71.1614	74.4192	79.0107	82.7655	86.3847	90.1523	93.55	96.592	99.9358	103.731	106.204	108.612	110.505	112.625	114.111	114.339	115.048	115.201	115.741	116.012	115.379
	60.4827	61.4748	60.6187	59.6246	59.54	58.3554	58.778	59.1446	58.9656	58.9989	58.6309	58.9587	58.8285	58.3293	58.5157	58.7206	59.0609	58.679	58.5586	58.3587	58.4351	58.3461	58.8572	58.6328	58.6005	87.6911	75.5813	77.2873	79.7895	82.8479	85.5602	88.6146	91.2921	94.2312	96.8126	98.5728	100.388	102.143	103.559	104.894	105.9	106.775	107.025	106.57	106.154	105.787	105.675	105.479	104.211
	72.6069	73.0192	71.7442	70.4866	70.6495	69.2416	69.4832	70.0246	69.8363	69.9288	69.5837	69.5367	69.494	68.914	69.0978	69.1015	69.7201	69.3188	68.9583	68.958	69.0642	68.9907	68.896	68.8174	68.6429	92.422	81.9953	87.2344	94.6271	104.211	115.391	126.538	138.179	149.297	159.689	169.821	177.838	183.543	189.07	192.183	195.617	199.156	202.141	203.82	205.638	207.527	208.696	211.054	211.248
	54.2596	54.9204	54.249	53.1448	52.9864	51.9432	52.3217	52.749	52.701	52.8318	52.6808	52.3153	52.4417	51.9472	52.3133	52.4945	52.9111	52.4235	52.4467	52.1025	52.4445	52.1237	52.5077	52.3133	52.2532	86.558	73.4144	74.8403	77.3061	81.0855	84.4566	87.3714	90.7869	94.373	98.2493	101.807	105.223	107.562	109.591	111.413	112.871	114.613	114.869	115.475	115.015	115.646	115.72	115.782	115.366
	67.0448	68.0903	67.0497	65.356	65.4187	64.5403	64.5328	65.0007	64.8508	64.949	64.7469	64.5987	64.4349	63.8921	64.1974	64.2163	64.8307	64.4198	64.1682	63.781	64.0233	63.991	64.0998	64.1927	63.6868	88.7839	75.4562	77.4379	80.1364	83.4388	86.9856	89.9959	92.9242	96.8292	101.017	105.343	108.83	111.77	114.016	115.984	117.952	120.291	121.621	122.726	124.175	125.581	127.018	129.316	129.694
	65.8816	66.7221	65.947	64.5679	64.5662	63.6248	63.7523	64.1108	64.0071	64.1205	63.9095	63.8012	63.9205	63.0814	63.3184	63.6243	64.1289	63.8548	63.5042	63.4213	63.4097	63.5254	63.642	63.8947	63.4339	86.1266	69.2933	72.6483	76.0508	80.8264	87.0639	94.8484	103.94	112.943	121.525	132.055	139.267	144.495	148.17	151.531	153.258	154.24	151.881	147.356	144.778	142.029	139.229	136.971	133.37
	163.136	165.841	165.002	161.868	162.347	159.8	159.637	161.386	161.981	160.885	161.674	161.93	161.297	160.204	161.36	161.039	163.03	162.581	161.943	162.796	162.164	162.305	162.853	164.007	162.993	161.427	160.354	186.985	211.704	233.176	256.323	271.898	280.923	289.522	297.508	303.648	309.416	311.63	312.93	313.691	314.935	318.513	319.603	318.273	316.166	313.338	310.753	308.369	306.569
	80.8247	81.4122	80.0198	78.4271	78.5202	76.997	77.4698	77.9286	77.7259	77.8315	77.6709	77.7483	77.4633	76.8961	77.2675	77.2519	77.7709	77.3285	77.0151	76.7997	76.8781	76.8491	77.0241	76.7295	76.6438	95.8284	84.7171	86.721	89.7432	92.7225	96.0527	100.784	104.555	107.219	109.682	111.783	114.081	115.436	116.427	117.115	117.838	118.652	118.985	118.124	117.554	117.402	116.687	116.085	115.133
	59.0167	59.7578	58.9492	57.719	57.5097	56.4565	56.9498	57.1403	57.1884	57.166	56.7032	56.8542	56.731	56.1715	56.6214	56.6127	57.0687	56.9727	56.3671	56.3913	56.4061	56.3868	56.6488	56.2873	56.4394	83.8037	69.9247	71.5484	74.0911	76.4075	80.0138	86.2456	93.4477	100.829	107.686	113.159	117.824	121.826	125.77	128.914	131.68	134.838	136.444	137.704	138.239	137.908	137.931	138.175	136.873
	65.859	66.2813	65.0757	63.9903	63.7834	62.6248	63.1713	63.2209	63.2025	63.147	63.1428	63.1101	62.8404	62.0669	62.6235	62.6344	62.9771	62.6607	62.4763	62.5852	62.6284	62.3241	62.5575	62.2942	62.4138	82.6049	70.5395	73.4061	77.418	81.3352	85.4104	90.2547	95.784	101.957	107.754	112.861	117.258	121.194	125.378	128.558	131.974	135.899	138.055	138.936	139.331	138.491	136.999	135.598	132.474
	63.4824	64.6623	63.4462	62.1978	62.108	61.3154	61.7526	61.8894	61.9767	62.0951	62.0682	62.1611	62.1879	61.5997	62.0875	62.2467	62.7194	62.3774	62.1049	62.2674	62.2771	62.3576	62.7839	62.6292	62.4727	84.9707	74.1274	78.3812	83.3253	88.7986	95.3569	102.179	110.264	119.183	126.34	132.888	138.223	142.202	145.278	147.058	148.924	150.495	150.299	148.955	147.244	145.517	142.995	141.449	138.261
	57.0716	58.1329	57.2275	55.8719	56.2302	55.2206	55.6106	55.912	55.9088	56.0357	55.9386	55.8089	55.8686	55.3282	55.7628	55.9126	56.5785	56.0463	55.7354	55.7358	55.8679	55.8764	55.738	55.8883	55.8365	77.3078	63.7669	66.144	68.8203	72.2716	76.1117	80.1962	85.1633	89.5481	93.5757	97.5246	100.051	102.661	104.268	105.929	107.845	109.713	110.869	111.219	111.787	111.744	111.821	111.876	111.416
[truncated: 130 more columns]

## Sheet: Panel I
IP3R1 shRNA Neurons	61.6693	65.1779	64.6513	64.2744	63.9917	64.0343	63.8866	64.313	64.3168	64.6079	64.3098	64.6067	64.845	64.4348	64.4247	64.0514	64.1202	64.5295	64.6145	64.6859	64.5513	64.4362	64.3561	64.3683	63.9906	92.1527	83.5121	84.0782	84.1672	84.5543	85.4626	86.3263	87.0043	86.6741	86.2551	85.8419	85.0842	84.4638	84.2368	83.864	83.3144	83.1659	82.7301	83.0196	82.5883	82.5488	82.0216	81.866	81.4719
	60.8072	63.7038	63.3379	62.6057	62.7812	62.7274	62.7411	62.8384	63.0806	62.8855	63.0931	62.9575	63.2695	62.9206	62.8873	62.8597	62.8484	63.0831	63.294	63.0986	63.3477	63.3602	63.1033	62.6945	62.5673	90.3239	80.6289	80.7709	80.6629	80.8775	81.3087	81.4947	81.3768	81.5846	80.5108	80.3004	79.5449	78.6363	78.2536	77.6633	77.2141	76.7603	76.3222	76.7846	76.2503	75.9614	75.409	75.3171	74.9242
	68.4321	71.7875	71.1813	70.8091	70.6916	70.5427	70.5547	71.0402	70.9674	71.3313	71.1824	71.3303	71.5825	71.1115	71.2332	71.1639	71.1348	71.2659	71.7528	71.6449	71.6405	71.4972	71.5212	71.2057	71.3245	98.0817	89.658	91.4164	94.2099	97.1751	100.003	102.545	104.784	106.63	107.235	108.617	108.718	108.573	108.89	108.662	108.566	107.858	106.801	106.238	105.149	103.843	102.722	101.963	100.594
	60.7237	64.0135	63.1038	63.0521	62.2247	62.8396	62.3263	62.9547	62.8803	63.0818	62.7191	62.8714	63.0866	62.4339	62.8442	62.4219	62.3501	62.2511	63.0004	62.9047	62.6502	62.3342	62.799	62.3973	62.2932	86.2443	76.9088	77.4364	77.554	77.2616	77.1592	77.0395	76.5795	77.0421	76.7856	76.313	76.2522	76.174	76.0616	76.3626	76.4065	76.5701	76.0833	76.8529	76.9525	76.3545	75.7898	75.5792	75.5715
	104.195	109.185	108.147	107.421	107.124	107.344	107.162	107.226	107.081	107.406	106.936	107.253	106.875	106.501	106.514	106.166	105.508	105.97	106.663	106.346	105.971	105.334	105.45	105.026	104.493	115.738	108.982	112.645	117.952	123.778	130.677	136.027	141.219	145.014	145.949	146.641	145.907	144.644	144.298	143.695	143.763	143.06	141.501	141.324	140.047	138.998	137.228	136.528	135.104
	65.6211	68.8363	68.345	67.9565	67.8576	68.1077	67.9068	68.1943	68.2589	68.5594	68.1894	68.6713	68.86	68.3097	68.4523	68.3912	68.3428	68.5319	68.9206	68.5373	68.534	68.5489	68.4246	68.284	68.0001	103.989	93.8385	93.5925	93.8059	94.0359	94.3474	93.9078	93.905	93.3773	92.2467	91.8182	90.7842	90.0053	89.1991	88.7532	88.1812	87.6953	87.0762	87.1594	86.9911	86.2794	86.3225	86.0657	85.4999
	72.2969	75.4262	74.7851	74.5639	74.2945	74.4939	74.5911	74.9808	74.9889	75.1188	75.0095	75.3028	75.676	75.1717	75.3639	75.0886	75.1763	75.4059	75.7376	75.5769	75.3214	75.4472	75.3559	74.9518	75.1021	113.05	105.804	109.323	113.459	118.797	122.352	124.61	126.879	128.022	128.467	129.592	129.054	129.155	128.538	127.649	126.717	125.134	123.675	123.484	122.203	120.831	119.675	118.834	116.822
	65.3022	68.5036	67.5933	67.3816	67.2819	67.4185	67.1362	67.184	67.5175	67.6094	67.499	67.1366	67.6388	67.152	67.3463	67.0517	66.9693	67.2692	67.5224	67.6676	67.1846	67.4405	67.3096	67.0622	66.9632	87.881	78.4305	78.6983	79.4571	80.5346	81.8664	82.7301	84.4419	85.1059	85.0203	85.608	85.2222	84.5221	84.288	84.3675	83.8625	83.4226	83.5975	83.5349	82.8695	82.7765	82.2786	82.1621	81.7142
	60.038	63.0562	62.3246	62.1045	62.1131	61.8885	61.9625	62.0326	62.3049	62.2795	62.1419	61.9858	62.4981	62.2007	62.2589	62.0019	61.9942	62.3015	62.203	62.5621	62.267	62.4203	61.8448	61.8582	61.7855	98.9504	88.4344	87.6974	87.2601	86.6971	86.3558	85.9061	86.0874	84.8031	83.4621	83.0244	81.6574	80.4605	79.6722	78.8561	77.9777	77.5759	77.0618	77.124	76.9182	76.1753	76.2639	76.1775	75.392
	72.5269	75.8807	75.4161	74.9643	75.032	74.7958	74.8646	75.1647	75.0708	75.5328	75.3455	75.3492	75.5296	75.4021	75.1555	75.1994	75.0706	75.0208	75.5012	75.3112	75.2082	75.0968	74.8456	74.5946	74.6375	113.688	106.176	107.518	109.445	111.306	113.282	113.433	114.001	113.755	112.791	112.066	110.714	109.374	108.479	107.498	106.485	105.517	104.995	104.493	104.008	103.253	102.373	101.875	100.599
	65.5021	68.8002	67.8347	67.7813	67.4841	67.6796	67.4696	67.992	67.8865	68.1442	67.8167	67.9013	68.4415	68.1771	67.8571	67.8174	67.7226	67.8505	68.2557	68.0661	68.0237	67.8734	67.9565	67.499	67.5461	87.3242	78.8545	79.6234	80.8886	82.4267	84.5366	86.5182	88.7176	90.5091	90.7778	92.0278	91.7222	91.5578	92.3022	92.1872	92.4786	92.764	92.9212	93.4816	93.6392	93.3368	93.5783	93.8997	93.9486
	95.6958	99.951	99.2514	98.9737	97.8481	98.3959	98.0797	99.0472	98.1954	98.2847	98.1118	97.8781	98.2927	97.477	97.88	97.7384	97.1831	97.1463	97.3145	97.0297	96.8335	96.4468	96.3597	95.1337	95.4674	117.811	109.132	109.964	111.828	115.434	122.153	129.778	137.353	143.814	148.038	151.334	153.19	154.352	155.675	155.503	154.266	153.919	153.803	153.991	153.659	152.551	153.101	153.281	152.282
	76.2542	74.596	73.816	73.521	73.4371	73.2078	73.3656	73.5483	73.801	73.9089	74.0272	74.0644	74.2437	74.1154	74.4991	74.459	74.6014	74.7946	74.5681	74.6604	74.4291	74.6312	74.4044	74.5955	74.8448	110.509	102.815	108.507	116.093	121.445	123.865	125.909	125.591	124.941	124.368	122.758	122.456	121.637	119.998	118.486	116.89	115.043	113.632	112.464	111.223	109.492	108.815	106.851	105.795
	67.7566	66.412	65.733	65.0081	65.1895	64.8213	64.8832	65.1924	65.1612	65.5001	65.817	65.9293	66.0588	65.9301	66.1844	66.3213	66.6385	66.5766	66.3862	66.6242	66.5442	66.1307	66.5436	66.3271	66.4253	102.262	90.9648	90.8488	91.1849	92.1906	93.4698	94.6555	95.7182	97.0232	97.9844	99.0766	100.337	100.822	101.415	101.785	101.908	101.536	101.677	101.736	102.019	101.338	102.297	100.906	99.9557
	76.4032	75.0759	74.0588	73.5813	73.4953	73.3049	73.0146	73.4527	73.6742	74.1089	74.2128	74.3684	74.2744	74.1923	74.4621	74.6238	74.926	75.1876	75.437	75.3326	75.4046	74.9295	74.8522	74.978	75.136	103.136	94.8756	96.6952	97.9301	98.7177	99.3971	101.219	102.882	103.978	104.893	105.052	105.045	104.16	103.246	102.211	101.551	100.976	100.088	99.5961	98.9412	98.2164	97.9915	96.8605	96.0481
	89.7021	88.0039	87.0808	86.4252	86.125	85.9325	85.9296	86.4155	86.4287	86.9896	86.8714	87.1455	87.4389	87.0623	87.4214	87.5802	87.7424	87.8624	87.9063	87.94	87.6361	87.6046	87.5427	87.7423	88.0797	124.987	116.854	118.942	121.25	122.471	123.334	124.559	125.37	125.96	126.416	126.222	126.148	125.283	124.758	124.109	122.821	121.781	120.873	120.07	119.382	118.616	118.242	116.834	115.974
	78.331	76.6387	75.6397	74.9133	74.9804	74.8243	74.6788	74.7975	75.0438	75.4351	75.4148	75.598	75.5145	75.6765	75.8017	75.9102	76.2999	76.122	76.5134	76.4199	76.4945	76.1447	76.1441	75.9962	76.0664	96.9693	89.807	91.803	94.207	95.1469	95.4902	96.5591	97.5725	98.3519	98.6032	98.7923	98.819	97.7906	97.3217	96.683	96.0366	95.5354	94.8239	94.548	94.0627	93.4448	93.4962	92.5107	91.763
	76.9933	75.3397	74.4821	74.0005	73.9329	73.7589	73.694	73.8327	74.0096	74.3269	74.2533	74.3725	74.5997	74.3206	74.7788	74.8182	74.7115	75.0762	74.7243	75.0208	74.7694	74.4888	74.5914	74.7149	74.8295	100.083	88.0704	88.064	87.9633	88.1926	87.9475	87.9512	87.276	86.9938	86.4217	85.5628	85.5395	84.8792	84.4497	84.0209	83.5134	83.1077	82.6686	82.5271	82.5618	81.9275	81.8924	81.2608	81.0754
	86.7676	85.0367	84.5856	83.7468	83.6803	83.6998	83.3985	83.6268	83.6266	83.8609	84.1525	83.9136	83.9815	83.8228	84.4678	84.41	84.3469	84.6848	84.3676	84.5855	84.4186	84.3207	84.0732	84.3503	84.4648	100.173	88.5649	90.8332	92.3409	95.2774	96.283	97.9004	98.2903	98.8674	99.5181	99.7585	100.4	99.9049	99.3942	99.6199	99.4438	98.7815	98.748	98.7848	98.3871	98.1472	98.1899	97.4005	96.5158
	87.9877	85.948	85.8939	84.9972	85.2719	85.5902	85.2336	85.3919	85.8573	86.3117	86.7564	86.4392	86.8797	86.9343	87.7349	87.5606	87.7165	88.4603	88.2283	88.4861	88.3529	88.2505	88.4976	88.8897	89.5078	105.086	91.8548	92.5035	92.7439	93.3663	94.7399	92.9503	93.0888	94.0081	94.5944	93.485	94.2102	93.6014	93.7198	93.111	92.9394	92.0528	92.396	91.8296	91.7102	91.2821	91.6573	90.8947	90.531
	72.8194	71.4831	70.9285	70.3742	70.4266	70.0341	70.3595	70.548	70.588	70.9337	71.3059	70.9839	71.4707	71.1255	71.5395	71.4463	71.8792	71.8258	71.8187	72.1356	71.8728	71.8134	72.0536	71.8867	72.2055	99.3234	88.67	89.5243	90.8138	91.1542	91.6132	91.7894	91.7532	91.4447	91.6527	91.2212	91.1855	91.0451	90.728	90.357	89.7807	89.2615	88.8651	88.7864	88.5231	87.778	87.8238	87.2438	86.7938
	121.8	119.768	118.54	117.763	118.109	118.004	117.578	118.367	118.773	118.862	119.268	119.288	119.63	119.435	120.209	120.067	120.553	120.529	120.48	120.71	120.42	120.703	120.288	120.805	121.24	157.409	152.347	161.981	170.822	179.04	183.926	187.598	187.503	186.363	185.612	184.15	183.065	181.018	179.667	176.986	175.562	173.546	172.206	170.72	168.884	167.131	166.147	163.788	162.139
	65.331	63.6165	63.1492	62.7988	62.6399	62.6635	62.3283	62.6981	62.7286	63.202	63.2602	63.5009	63.3846	63.5069	63.6342	63.8772	63.857	64.0936	63.8075	64.2144	63.8635	63.9347	63.9239	64.2319	64.3143	96.4375	87.3992	87.0481	87.0207	86.5329	86.2171	85.7802	85.4779	85.0753	84.7341	84.188	84.319	83.7864	83.2311	82.9103	82.5921	81.8774	81.8428	81.4008	80.9187	80.3411	80.209	79.7012	79.1275
	79.663	77.9102	77.0391	76.4129	76.5128	75.8802	75.9841	76.1109	76.2228	76.5966	76.8316	76.906	76.8475	76.8453	76.9748	77.1317	77.5516	77.5109	77.2313	77.4847	77.4934	77.2944	77.1738	77.2821	77.3394	99.1268	90.5795	91.532	92.6109	93.2223	94.1734	94.8724	95.2271	95.5123	95.9865	96.335	97.2521	97.2099	97.6503	98.0328	98.3369	98.6064	98.6389	99.015	99.2311	99.2256	99.2697	98.2125	98.0664
	91.9011	89.9153	88.9812	88.0684	88.0366	87.5718	87.3169	87.5722	87.8858	88.1545	88.3284	88.2818	88.3941	88.0932	88.6383	88.6549	88.724	88.7656	88.9501	88.8845	88.699	88.8937	88.5252	88.3448	88.6933	110.787	101.814	103.046	104.777	106.409	108.661	110.855	111.659	112.232	112.656	112.559	112.845	112.428	112.119	111.747	111.339	110.887	110.355	110.19	109.39	109.131	108.345	107.176	106.517
	71.0945	69.5577	68.8346	68.0902	67.9479	67.9014	67.8683	68.4002	68.3343	68.6338	68.9091	68.6715	69.1493	69.06	69.0325	69.3641	69.1431	69.6111	69.5697	69.6356	69.4049	69.4258	69.3324	69.6387	69.8897	104.239	98.2657	100.735	103.401	107.164	111.905	117.284	122.732	128	133.376	139.353	144.514	148.081	149.586	150.273	149.577	147.146	144.977	141.961	139	135.978	133.829	129.963	127.612
	73.01	71.5778	70.7396	70.3488	70.2568	70.0828	70.0895	70.3497	70.3254	70.5562	71.0264	70.9436	71.3201	71.0902	71.2667	71.235	71.5988	71.9766	71.8236	72.0757	71.5715	71.5704	71.575	71.8163	71.9217	99.8925	92.2247	94.315	96.7599	97.7667	97.962	98.891	99.7118	100.071	101.383	101.866	102.698	102.564	102.432	102.285	101.151	100.571	99.5292	99.0388	98.328	97.5402	96.8881	95.3868	94.9759
	86.7874	84.6816	83.7709	83.0934	83.3088	82.7554	82.8665	82.8725	83.1259	83.4681	83.9293	83.912	83.8892	83.8609	83.9774	84.3851	84.11	84.697	84.35	84.4587	84.336	84.4541	84.1965	84.3396	84.6026	112.856	102.992	103.151	103.321	103.233	103.587	103.629	103.125	102.895	102.295	101.92	101.945	101.496	101.028	100.717	100.353	99.8714	99.4139	99.0142	98.9417	98.3671	98.3332	97.6465	97.4405
	72.0566	70.4462	69.7308	69.3336	69.0937	68.9059	68.9862	69.1169	69.383	69.5705	69.9238	69.9034	70.0734	70.0641	70.1206	70.3994	70.6919	70.9165	70.8364	70.9154	70.8478	70.8597	70.6665	70.9476	70.986	106.012	96.5448	97.5712	100.763	102.276	103.918	105.402	105.533	105.203	104.806	104.266	106.167	106.629	107.284	106.763	106.087	105.299	104.379	103.54	102.711	101.535	101.015	99.8103	98.9372
	66.4114	64.8013	64.1136	63.5665	63.489	63.3296	63.4001	63.3957	63.9072	63.9669	64.0122	64.2089	64.349	64.4378	64.7976	64.6514	64.7604	65.1243	64.9308	65.1307	64.8561	64.9577	64.6462	64.9659	64.9943	96.3807	85.4021	84.9324	84.1466	83.9173	83.4185	83.0845	82.4855	81.8137	81.3794	80.9685	80.9839	80.4239	79.9614	79.652	79.6072	79.0394	78.6142	78.7242	78.3826	78.3203	78.6222	77.7789	77.7576
[truncated: 134 more columns]

## Sheet: Panel K
shRNA NS Neurons	15.7849	15.5671	15.6043	14.8866	14.8334	14.9482	14.6697	15.4783	15.411	15.0503	18.9325	20.8368	23.0154	26.4894	30.6397	32.3629	34.5616	37.0424	40.9967	42.3148	43.5658	44.2403	45.0365	45.783	46.5703	46.6693	48.0281	48.359	48.4341	48.5164	47.8209	48.791	48.4604	49.1846	49.2845	49.2688	49.258	49.5953	50.3585	49.6165	49.985	49.627	49.7132	49.6526	49.4777	49.6678	50.0226	49.6852	49.4087
	10.1978	9.9875	10.0576	9.29221	9.20651	9.59995	9.00138	9.54711	9.80697	9.41728	14.2807	15.2914	16.836	17.805	19.0135	19.435	20.6256	21.0615	22.2661	22.3954	23.3806	23.4571	24.5984	25.2699	25.6382	26.0187	27.2507	27.8897	28.6204	28.7961	28.1648	29.3824	29.1673	29.3649	29.6533	30.1214	30.0853	30.7581	31.1816	31.0832	31.2152	31.0345	31.3835	31.7433	31.2232	31.1921	32.0256	32.179	32.3123
	12.3274	11.8428	12.1201	11.2363	11.4769	10.9467	11.2851	11.8503	11.6357	12.1593	16.3749	17.5728	19.1615	20.4396	21.4433	21.9819	23.1218	23.811	24.7869	25.4967	26.4534	26.7573	27.6011	28.3637	29.6526	29.2263	29.974	30.6657	31.2239	31.7159	31.1036	32.54	32.5949	32.833	32.7722	33.0634	32.6657	33.5467	33.9327	33.5806	34.1972	34.2892	34.4849	34.5492	34.4059	34.7769	35.3336	35.0369	34.8209
	26.2518	26.0199	26.3206	25.2762	25.9049	26.0298	25.5304	27.2521	26.8227	26.5953	31.6758	32.7704	35.1369	37.124	40.8305	61.3458	93.844	121.685	135.694	133.603	129.166	123.106	117.606	112.765	108.645	103.416	100.549	96.3622	93.169	90.0763	86.425	83.7864	80.777	77.9834	75.3989	73.2948	70.8646	68.7348	66.5806	64.5094	62.57	60.7229	59.5938	58.5601	56.2038	55.2317	54.6091	53.0469	51.9667
	9.41761	9.80741	10.0636	9.27911	9.41042	9.23126	9.20594	9.83768	9.54273	9.71068	12.9466	14.0806	15.3148	16.4671	17.0912	17.8679	19.1094	19.241	20.4055	20.5664	21.1897	21.5586	22.2038	23.0166	23.9072	23.9449	25.0552	25.1797	25.5137	25.5374	24.7824	25.9317	25.3814	25.7159	25.683	25.8346	25.6007	26.0063	26.6638	26.1613	26.2489	27.0236	27.1845	27.3706	27.2516	27.346	27.8112	27.5095	27.6594
	14.7855	14.6065	14.7215	14.283	14.2591	14.0816	14.0209	14.8074	14.389	13.9979	17.2735	19.5849	21.7208	22.8255	23.4816	23.6781	24.4774	25.1038	25.6	25.9072	26.9026	26.6422	27.767	28.4295	28.9749	29.1715	31.0217	30.6342	30.537	31.0198	30.5951	31.5608	31.6065	30.8809	31.2326	31.5526	31.0662	30.9446	31.2367	31.056	31.3789	30.7265	30.7615	31.2461	30.5859	30.2078	30.6693	31.0347	30.4288
	17.6606	17.0115	16.7744	16.8883	16.0703	16.4076	16.0498	16.8723	16.3329	16.4266	19.152	19.4076	21.1868	21.6366	21.9811	22.3782	22.876	22.971	23.7384	23.5065	23.5855	24.2012	24.4634	24.3766	24.5688	24.5585	25.4197	25.5071	25.1871	25.5881	24.4771	24.9097	24.3815	23.853	23.0794	23.1699	23.5632	22.8817	22.8062	22.9948	22.526	22.3928	21.9416	22.1729	21.4947	21.4235	21.4194	21.4918	20.9058
	14.562	13.9529	14.1639	13.7127	13.76	13.7458	13.2746	13.6252	13.6867	13.415	16.1469	16.3241	17.3179	18.3666	18.1119	18.6389	18.8264	18.9732	19.2567	19.8092	19.6581	19.4335	20.2147	20.4259	21.1624	20.2437	21.1004	21.5592	21.6911	21.0066	20.4525	20.5111	20.6462	19.7247	19.3892	19.3719	18.8498	18.7231	18.7578	18.6314	18.6948	17.7492	18.4539	18.1202	17.7681	17.3868	17.7659	17.5174	17.0921
	20.1267	19.7437	19.5694	19.3322	19.1753	18.9941	18.2617	18.7679	19.6248	18.8963	22.623	23.7867	25.1852	26.3179	26.7452	27.227	28.8754	28.1467	29.4643	29.9414	31.4935	32.0192	31.8779	32.4512	33.0179	33.7739	36.042	38.3585	38.4725	40.1586	39.869	40.585	40.7217	41.3134	41.5896	41.5591	41.2348	41.4411	42.5414	42.4748	42.943	42.9946	43.0666	42.8983	43.1209	43.3445	43.2391	43.9774	42.6065
	35.5125	35.393	35.6685	36.3146	36.5562	36.188	35.835	35.8752	35.3611	35.4726	38.741	38.6113	38.297	38.6354	38.8315	40.2472	40.5746	40.8831	41.5426	41.9066	42.6697	43.0878	44.3775	43.6002	44.5226	44.3022	44.6986	45.498	45.3848	46.1222	46.307	46.6111	46.7098	47.0614	47.111	47.0751	48.0575	47.4	47.6991	48.2937	48.2754	48.2027	48.3934	48.4668	48.9442	48.972	48.5513	48.6551	48.6451
	37.9672	38.2346	37.9756	38.2727	38.3094	37.8061	37.9137	37.1712	37.1397	37.6628	41.495	39.9175	39.6115	39.1212	39.8621	40.8462	41.5824	41.3969	41.7715	42.9188	43.0141	43.62	44.1406	43.9633	44.3272	44.7352	45.611	45.9166	46.4414	46.5561	46.7577	47.3545	47.361	47.2417	47.4071	47.7855	48.6509	48.3082	48.5397	48.4305	48.3258	48.7386	48.4179	48.3351	49.0153	48.6371	48.928	48.8714	48.8643
	48.3203	48.3147	48.3079	48.3794	48.3155	48.2473	48.0193	47.2824	46.989	47.1001	49.5016	48.4803	48.2839	47.8637	48.3279	49.6536	49.9421	49.99	50.1297	50.8385	51.5949	51.6745	52.351	52.6111	52.7632	53.0599	53.6199	53.8418	54.5073	54.8493	54.9796	55.4598	55.6561	56.2411	55.9234	56.3655	57.3371	56.9656	57.3173	57.6876	57.8433	58.2689	58.1473	58.208	58.7322	58.4416	58.9107	58.7938	59.3553
	47.2175	46.5938	47.2162	47.2282	46.9472	47.3362	47.4758	45.8832	45.5994	46.7887	50.0051	48.9784	47.8732	48.6074	48.9239	50.9799	51.0454	51.1083	51.9366	52.4837	52.439	52.5088	53.7033	53.9591	53.6359	54.5159	55.0374	55.127	55.146	55.7931	55.581	55.8571	56.1898	56.7651	55.9178	55.9888	56.7775	56.2068	56.3393	56.7309	57.1563	56.7959	56.6298	56.3359	56.3897	56.8053	56.4382	56.0983	56.3502
	40.6878	40.3862	40.7274	40.7306	40.6389	40.3843	40.5644	40.3708	39.9047	40.5981	45.3857	44.5572	44.6783	45.2746	46.1003	47.6598	48.4217	49.1326	50.4387	51.1975	52.0539	53.1646	54.2074	54.4088	54.8903	55.3014	57.1593	58.2782	58.4077	59.5356	59.5167	60.341	60.557	61.1542	61.1716	61.9142	62.3015	63.002	62.7656	63.8447	64.2142	64.4166	64.3743	64.6665	65.6121	65.0665	65.5068	65.1302	65.5662
	38.2717	37.9726	38.3441	38.4681	38.1016	38.217	37.6784	37.5682	37.1324	37.6053	41.5257	40.9189	40.5118	40.9529	41.0677	42.3393	42.9499	43.1039	43.4598	44.6439	44.1563	44.8476	45.5578	45.5796	45.3692	45.8328	46.3248	46.7435	46.8204	48.1263	47.809	48.5618	48.9942	49.335	48.897	49.112	49.8227	49.4542	49.9892	49.6292	50.5438	49.9507	49.9797	49.2139	49.9743	49.8358	50.0201	49.8287	50.315
	42.3657	42.0993	42.1974	42.1257	41.9565	42.4606	42.3038	41.3371	41.1091	41.0634	43.9056	43.588	43.5202	43.7021	43.8892	45.5267	45.788	46.3056	46.3969	47.5544	47.9066	48.0177	48.9668	48.97	48.9248	49.2837	49.945	50.102	50.7192	51.1393	51.465	51.9092	52.0482	52.2481	52.7345	52.5256	54.1321	53.4697	53.3311	53.1788	53.7961	53.9699	53.7827	54.098	54.8833	54.5401	54.9369	54.4196	54.6629
	34.0028	33.9272	33.8157	33.8384	33.0397	33.5774	33.4973	33.1093	32.8933	33.2575	36.6072	36.7054	37.5577	38.4703	38.8342	40.4254	41.1913	41.9699	42.8379	44.319	44.4166	45.1766	46.1879	46.3811	46.5603	47.1429	47.6924	47.7789	48.6035	49.6695	49.5495	50.2049	50.0109	50.5314	50.3948	50.5566	51.4551	50.4688	51.1547	51.2858	51.7407	51.7151	51.463	51.3617	52.3467	51.9267	51.5949	51.5547	52.001
	64.2062	63.9693	63.3175	63.8972	63.3631	62.7727	63.1877	61.6952	61.8063	62.837	65.0727	65.0406	64.5472	64.5726	65.2543	66.7821	67.6644	67.1004	67.8755	69.0759	69.4552	70.0257	71.5089	70.6473	71.5349	72.1109	72.1605	72.799	72.9371	74.1869	73.3994	73.619	74.6349	75.0254	74.2584	74.4839	75.8255	75.0072	75.7782	76.2003	76.4849	76.3496	76.5204	75.975	76.9303	76.548	76.8681	77.1033	76.7265
	43.6305	43.1617	43.3454	43.2765	43.105	42.0809	42.7383	42.02	41.7831	41.6791	45.893	45.5276	45.145	45.4233	46.0566	46.941	47.4136	48.2621	48.6935	49.9307	50.4218	51.3761	52.4589	52.8937	53.3344	53.7861	54.7896	54.8548	55.7265	56.6853	56.7339	57.1698	57.8574	57.9016	58.4823	58.6362	59.4593	58.7158	59.4079	60.2337	60.3212	60.8226	60.7095	60.5987	61.3678	61.4669	61.6798	61.0359	61.4615
	41.5633	42.0415	41.9179	41.6844	41.3136	40.4998	40.7909	39.8447	39.6368	39.761	42.6328	42.5362	42.3847	42.3153	42.8431	43.5049	44.9154	44.6209	45.8523	46.4754	47.3355	47.3062	48.689	48.3799	48.7818	49.2254	50.0702	49.5013	50.583	50.7503	51.7317	51.8771	51.6186	52.5916	52.5193	52.6329	53.8022	53.3548	53.9	53.9548	54.4693	54.6319	54.1227	55.6766	56.5924	56.0644	56.8762	56.4625	56.6403
	47.0881	47.6546	47.2215	47.1703	47.4919	46.8665	47.0559	46.645	46.3967	46.2184	51.1195	49.9891	48.813	49.2361	49.901	50.8951	51.163	51.3224	51.6743	52.5921	53.3097	53.6894	54.4433	54.5642	54.556	55.6056	56.3037	56.7462	57.6626	57.928	57.7909	58.2251	58.1248	58.6676	59.0918	59.7368	60.0959	59.5961	60.0324	60.223	60.5599	60.2892	60.3133	59.7218	60.4295	60.102	60.6779	60.451	60.4149
	42.1858	42.2403	42.6287	42.812	42.7008	42.6495	42.6318	41.7978	42.3723	42.6127	45.5185	45.2522	44.1171	45.2353	45.7998	47.3299	47.6551	48.2425	48.4481	49.1813	50.2745	50.8289	51.0452	51.1288	51.7225	51.7887	52.2511	52.7244	53.7467	54.365	54.5315	54.7153	55.1585	55.0321	55.0868	55.1103	55.7739	55.7106	56.0374	55.502	56.027	55.9339	55.9488	55.6137	56.7262	55.8367	55.3905	55.6023	55.7232
	54.695	55.0285	54.7359	56.7781	56.7879	56.4408	56.3698	55.8075	55.7836	55.851	56.1405	58.5455	60.079	61.9809	66.4551	72.7461	75.9186	78.2799	81.2744	83.3248	84.4737	85.3485	86.8462	86.0026	87.2455	88.2382	88.8316	89.2442	90.149	91.0222	90.7156	90.2929	90.6382	91.1855	90.7572	89.7592	90.0426	89.1782	88.798	88.1323	88.0705	87.6628	86.3146	86.1939	85.626	84.4525	84.3141	83.7956	83.0432
	41.8787	41.9396	41.6346	42.3901	41.8399	41.837	41.6883	41.5461	41.1216	41.3643	43.6263	43.9169	44.3206	45.7552	47.2899	49.2566	50.7235	51.7881	53.0819	54.6345	55.6126	56.384	58.1092	58.1613	58.7728	59.3992	60.3358	61.2397	62.1462	62.9916	62.8853	63.4303	64.1029	64.4368	64.6728	65.4556	65.941	65.8185	65.9585	66.2919	66.2571	66.157	66.0202	66.6484	66.9247	66.4138	66.545	66.3318	66.6387
	33.2658	33.5153	33.1789	33.6801	33.3765	33.3318	33.0293	32.3848	32.353	32.7729	35.5356	35.3496	35.3019	35.3793	35.5794	36.7778	37.6282	37.7872	38.329	38.8377	39.3546	40.0511	40.8291	40.75	41.4238	41.3485	42.304	42.4888	43.0803	43.4367	43.824	44.5372	44.9624	44.7911	44.838	45.0994	45.9014	45.1348	45.4448	46.2618	46.5805	46.5374	46.2637	46.6758	47.2761	47.4137	47.4535	47.5583	47.7269
	35.4019	34.7382	35.1019	35.5964	34.8423	34.2983	35.013	33.517	33.9648	33.7578	36.3996	36.0525	36.1844	35.8568	36.977	37.8198	38.4481	38.5383	39.6882	40.3192	40.7886	41.5134	42.0843	42.2911	42.5936	43.3561	43.3479	43.769	44.3894	45.2192	45.0439	45.9624	45.5883	45.7893	45.9317	46.105	46.9085	46.3064	46.8226	47.2104	47.2602	46.78	47.5571	47.4073	47.5558	47.1833	47.7995	47.374	47.9801
	28.3497	28.5155	28.2994	29.0439	28.7296	29.1133	28.8908	28.0947	28.0115	28.4915	31.2802	31.5765	31.4809	32.7291	33.116	35.2739	36.2962	37.1602	38.0251	39.8751	40.3917	41.8744	43.1628	43.4089	44.4785	45.9262	46.8109	47.5228	48.4315	49.821	49.9315	51.0346	51.5386	52.4278	52.8807	53.3767	54.6794	54.6678	55.1364	55.7611	56.9769	56.8304	57.5846	57.7573	58.6114	58.8206	59.2672	59.2431	59.831
	34.9551	35.2464	35.5042	36.1688	35.4458	35.5011	35.6196	34.6321	34.9925	35.8169	37.4628	38.3476	39.0446	40.5583	42.1806	44.8026	46.2554	47.4746	48.4807	50.1963	51.4813	51.9705	53.7316	53.8999	54.7652	55.1529	56.7094	57.2417	57.9402	59.0015	59.382	59.7527	60.3279	60.6283	60.2382	60.136	61.0537	60.3195	61.163	61.4364	61.7916	60.913	61.5111	60.9609	61.9943	61.6316	62.2585	62.3314	62.7059
	56.8022	56.7035	57.2361	57.7497	57.0286	56.4488	56.4339	55.8348	55.8674	56.297	57.8787	59.6412	60.8685	62.0286	62.9594	65.5933	67.0251	67.886	69.4225	70.2318	71.1481	71.4184	72.8744	73.2288	73.1676	73.8923	74.2395	74.1556	74.4645	74.9516	75.0216	75.0515	75.2813	74.9302	74.4828	74.2169	74.8725	74.0234	74.3453	73.6833	74.0428	73.3639	73.1524	72.4639	72.3035	71.5677	71.3298	70.6869	70.7667
	39.9893	39.7305	40.2607	40.7214	40.3721	40.1363	40.6021	39.9356	39.6154	40.5305	40.6741	42.2257	42.6648	43.5041	44.2628	46.2287	47.4339	47.7884	48.8583	49.9267	50.3437	51.4814	52.4583	52.759	53.4441	53.833	55.0897	55.5126	55.674	56.155	56.5741	57.1704	57.2742	57.932	57.571	57.6994	58.1806	57.9592	58.5372	58.4066	59.1948	58.6936	59.0539	58.5204	58.865	58.7215	58.9757	58.6517	58.8581
	34.3815	34.7361	35.0004	35.1395	34.7117	34.0752	34.9444	33.9575	33.7666	34.2404	35.8076	35.706	35.8946	36.3966	36.9783	38.681	39.333	39.5479	40.209	41.1671	41.4967	42.0092	42.9361	43.2824	43.457	44.0025	44.8993	45.2199	45.2084	46.1445	46.5324	47.2052	47.0927	47.9574	48.1226	48.2901	49.278	48.3652	49.4693	49.5028	49.6603	49.5257	50.4599	50.5137	51.2688	50.8614	51.6031	51.3312	51.3964
	31.6652	32.1899	32.2281	32.1331	32.1282	32.2425	31.761	32.021	31.1712	31.7297	33.7177	33.3383	32.9417	33.3555	33.9744	35.1157	35.8898	35.8261	36.8752	37.7747	37.9542	38.2833	39.2855	39.4311	39.6611	39.8829	40.3902	40.3944	41.1641	41.7721	42.1529	42.4512	43.0555	43.5216	42.8635	42.9664	43.9041	44.0158	44.3461	43.9998	44.559	43.6935	44.2078	44.9578	45.1898	45.1315	45.286	45.3366	45.0497
	40.3595	40.4794	40.8384	41.0787	40.997	40.6928	40.4776	39.8821	39.8659	39.8765	41.5079	41.3892	41.5394	42.5352	42.9617	44.5546	45.3104	45.5246	46.3413	47.2681	47.6662	48.7073	49.2377	49.3458	49.3489	49.9816	50.8135	50.8508	51.3114	51.8457	51.978	52.7164	52.879	52.8271	52.8174	53.2561	53.7463	53.4606	53.775	54.1164	54.0483	54.1673	53.6027	54.1261	54.5924	54.0471	54.1659	53.9298	54.0175
	59.9827	59.7375	60.2872	60.1602	60.2731	59.9357	60.0288	58.5604	58.905	59.5768	61.2918	61.0575	61.3845	62.079	63.3175	66.0967	66.0533	66.7767	67.7869	68.9352	68.9423	69.9142	70.6537	70.7779	71.202	71.786	73.1271	73.4029	73.8888	75.1572	74.1978	75.0385	75.2552	75.3183	74.861	74.8603	75.3766	75.1957	76.0324	76.0174	75.9248	75.962	75.6011	75.1205	75.3234	75.3464	74.9979	75.3597	75.0484
	44.0394	43.5243	43.8155	43.2665	43.103	42.2274	42.8719	41.9844	41.52	41.385	44.2638	43.3397	43.8279	44.369	44.9729	46.4908	47.2523	47.5965	48.4244	49.2604	49.5004	50.4996	51.1347	51.6229	51.9055	51.803	53.4394	53.4585	53.928	54.7527	54.8261	55.7083	56.2619	56.5995	56.7002	56.7124	57.5513	57.3946	57.7625	58.3083	58.3069	58.9089	59.1793	58.9433	59.9744	59.4689	59.6236	59.8803	60.4742
	41.9805	41.8423	41.6684	42.2109	42.0033	41.7578	41.4981	41.0163	40.6698	41.2094	43.438	42.2259	42.6048	43.4987	44.0631	45.4426	46.6372	47.0094	47.9533	49.2095	50.1804	50.5597	51.6295	51.6001	51.8073	52.575	53.8047	53.8954	54.5912	55.1063	54.9294	56.024	55.9213	56.3038	56.2534	56.9691	57.5127	56.633	57.6794	57.7388	57.6438	57.9697	57.6852	58.2202	58.0437	57.8076	58.73	58.2096	58.4131
	43.7986	43.8833	43.8173	44.7334	44.4667	44.381	44.175	43.953	43.3373	44.1996	45.0637	41.631	41.2922	42.5764	44.4404	46.7162	48.132	48.897	50.1974	51.8516	53.0411	54.0552	55.7991	56.4117	56.416	57.3365	57.9678	58.7489	59.3284	60.4787	60.9454	61.3634	61.7728	62.254	62.4765	62.5978	63.7128	63.2346	63.7549	63.6107	63.7504	64.0332	64.2258	63.6273	64.4363	64.1462	64.116	63.5311	63.9516
	37.9585	38.0405	38.2483	38.5341	38.3647	38.5137	38.4727	38.4616	37.9939	38.0267	41.1492	42.3281	43.4069	45.9336	47.0058	49.8273	51.8737	52.8767	54.729	56.9668	58.0556	59.4466	60.6368	61.812	62.6954	63.7089	64.6385	65.3235	66.6443	67.9218	68.7481	70.0475	70.1943	70.5184	70.7401	70.6988	71.9947	70.9827	72.1763	72.3739	72.8673	72.5394	72.7221	72.496	73.245	72.7756	73.4786	72.5844	72.8043
	56.1953	56.4917	56.8275	56.7876	56.2543	56.5136	55.695	54.9138	54.8346	55.1317	57.8292	56.6514	57.6842	58.8622	59.7318	62.1139	62.7212	63.2039	64.2858	65.1663	65.4458	65.9136	67.1846	67.2178	67.6976	68.3176	69.5762	69.2774	70.0044	70.9075	70.3442	71.0364	71.5421	71.6963	71.2372	71.388	72.2195	71.9049	73.0563	72.9006	73.6835	73.5426	73.639	73.086	73.1107	72.9303	73.3239	73.2092	73.5928
	27.1093	26.9996	26.8764	26.8712	27.0354	26.464	26.4461	25.6111	25.621	25.7998	29.544	30.2629	31.2544	33.0341	33.9089	36.2254	37.4511	38.4707	39.8039	40.8102	41.8436	42.0121	43.5578	43.6087	43.7339	44.0832	45.0071	45.1804	45.622	46.6546	46.896	46.7034	46.798	46.9309	46.527	46.5833	46.5922	45.7181	45.6343	44.9594	44.5611	44.1353	43.9078	42.789	43.649	42.628	42.3599	41.6116	41.0155
	40.0073	40.2097	39.7442	40.1043	40.1664	39.9579	39.7625	39.4628	39.0966	39.4361	42.3066	40.7131	40.5202	40.8672	41.987	43.6878	44.5683	45.0692	46.064	47.3172	47.585	48.1682	49.6127	49.6465	50.3021	49.7352	51.1724	51.6351	52.3815	53.0625	53.5015	54.2956	54.4929	55.3967	55.1082	55.4297	56.639	55.7319	56.8734	56.7876	56.9653	57.2087	57.4223	57.549	58.3666	57.9805	57.8978	57.8947	57.8907
	37.4	37.2435	37.2123	37.3747	37.5097	36.2102	36.5106	37.4362	36.9503	36.7934	42.4215	44.1155	47.2755	50.145	52.5971	56.256	58.6535	61.1596	64.1492	66.9368	68.1622	70.5665	73.1072	74.1161	75.6135	77.1441	79.2374	79.4072	81.1625	83.3275	83.7371	84.5069	84.9662	86.4407	86.5595	87.5467	87.5794	86.6305	87.7437	86.9416	88.5991	88.1302	87.5943	88.0189	88.1839	86.807	87.159	85.6939	86.086
	33.3042	33.77	33.1856	32.4676	32.5572	32.4989	31.9916	31.6243	31.9462	31.6691	34.8912	34.1212	33.4375	34.9161	35.4883	35.8429	36.0788	36.7282	36.6156	37.9223	38.3874	39.0252	39.1297	39.2675	39.8642	40.1195	40.7504	40.7578	41.9854	42.6937	42.9747	43.1181	43.0666	43.852	43.6719	44.8595	44.966	44.1336	44.6526	44.6141	44.8379	45.4482	45.1701	45.3992	46.1692	45.8072	46.4999	46.13	46.1008
	37.8928	37.4952	37.3132	37.4819	37.0524	36.7669	36.6787	36.1769	36.479	36.0373	40.2979	39.1953	38.5674	38.5059	38.403	39.8641	40.4555	40.6944	41.0577	41.9252	41.8004	42.4473	42.7152	42.8535	43.1057	42.9194	43.7041	43.9972	44.1448	45.1674	45.1368	45.6875	45.7415	45.7828	45.3986	46.3547	47.1294	46.4311	46.734	46.6224	47.1864	47.2155	47.4055	47.4773	47.8262	48.0722	48.0316	48.0155	48.2633
	41.9895	42.5409	41.5395	41.9263	41.0682	40.8512	40.4425	40.184	39.7305	39.3091	44.2908	45.5237	45.6977	47.1842	49.2875	53.0175	53.7757	53.892	55.1476	56.8234	57.9156	59.0369	60.5254	60.9604	62.4802	62.445	64.2552	64.4998	65.8699	67.1217	68.0257	68.4117	69.0018	69.6057	70.1994	70.2759	71.4214	70.9195	71.0393	71.4848	71.5893	72.22	71.7346	72.4255	72.7662	72.1061	72.2225	72.0936	71.7035
	36.3244	36.7104	36.4572	36.4521	36.0963	36.2554	35.361	35.3693	35.1155	35.3721	39.1496	38.2308	37.6799	38.9811	39.5721	41.1799	41.8055	42.1805	43.2778	43.744	44.4706	44.9115	45.9898	46.8367	47.005	46.77	47.7086	48.1022	48.8784	49.3017	49.5605	50.2867	49.9793	50.6461	50.5566	50.8053	51.4633	51.3372	52.0225	52.4539	52.2836	52.4014	52.6661	52.7751	53.3617	53.3044	53.6501	53.0307	53.661
	54.5944	54.3227	54.533	54.7158	54.3584	53.8532	54.1483	53.3254	53.108	53.2117	58.0031	56.5347	55.8525	56.1247	56.4438	58.0266	58.6412	58.5468	59.4662	60.1441	60.8345	61.2643	62.7146	62.3681	62.6797	63.2493	64.0041	64.419	64.0349	65.191	64.8202	65.1357	65.4577	66.0925	65.6298	65.8252	66.5319	66.0913	66.7288	66.8692	67.0177	67.0347	67.0179	66.9582	67.5192	67.1245	67.2182	67.2005	66.897
	48.5176	49.4336	48.9918	48.408	48.6335	48.3618	48.1842	47.6068	47.2426	47.6183	52.7056	52.5157	53.0027	54.6059	55.3799	57.7761	59.8138	60.7946	61.4349	63.4178	64.7742	65.7132	68.2007	68.2401	69.3346	69.8848	71.5921	72.6238	73.5286	74.4862	74.2567	75.7587	76.1938	77.4666	77.047	78.0322	78.5921	78.5005	79.1265	79.255	80.1538	80.1518	80.3745	80.5411	81.2206	81.0966	80.9817	80.4985	81.7548
	30.1939	31.0778	30.8233	30.9251	31.2574	31.1152	31.5565	30.6962	30.7767	30.8688	36.4127	37.2645	37.2461	38.7297	40.005	42.6511	44.1377	45.2444	46.1173	48.2117	49.4814	51.582	52.6615	53.4154	55.4427	56.5567	56.4564	57.3816	58.6637	59.6935	60.5791	60.7255	60.9435	61.6362	62.1595	62.2347	63.2426	62.3755	63.3726	62.7341	63.4331	63.0209	63.2431	63.5225	63.5058	63.1435	62.9931	62.7671	62.604
	51.8311	52.2346	51.674	52.0869	51.667	51.6044	51.6844	51.5164	50.6659	51.2468	56.2934	58.6835	59.8461	61.6735	63.6372	66.5426	68.0011	69.8581	71.5909	73.751	75.0082	76.4659	78.5337	79.3218	80.759	81.543	83.902	84.516	86.5171	88.7637	89.8145	89.7883	90.9745	91.3071	91.6683	92.3604	93.9441	93.029	94.2234	94.5972	95.1154	95.8323	95.8807	96.3628	96.5946	96.6437	96.3039	96.3954	97.0884
	45.2594	45.1326	45.6992	45.2974	45.9478	45.9076	45.1411	44.2285	44.1614	44.1968	49.0524	50.0054	49.8608	52.4608	54.2422	56.5178	58.1795	59.7881	59.8794	61.9713	62.9071	63.9919	65.3147	65.694	65.8209	66.5716	67.8745	68.0315	69.2167	70.4748	70.3144	70.8787	71.5292	72.0455	71.5376	71.8572	72.7808	72.285	72.6909	72.1626	73.9091	72.9579	73.1242	72.7629	74.4778	73.5289	73.9251	73.1884	73.5476
	34.6033	34.6866	35.19	35.3588	35.0514	35.1079	35.1918	34.703	34.8832	34.9443	40.1502	40.4358	39.6756	42.0062	43.3609	46.4	47.9379	48.8339	50.4931	52.4086	54.3022	55.7528	57.498	58.5107	59.6968	61.0081	62.0474	63.5958	65.4853	66.6408	68.0589	68.7979	69.8455	70.8923	71.9332	72.6515	74.4717	74.1986	76.0273	76.9003	78.7908	80.0035	81.1941	81.9588	84.2188	84.3359	85.5572	87.2225	87.8506
	36.057	36.0749	35.2139	35.3458	35.024	35.2436	34.8322	33.8297	33.5561	34.0321	36.6568	35.9416	35.1705	35.3289	35.7127	37.6589	38.1746	38.6919	39.3216	40.0064	40.0328	40.3536	41.6065	41.354	41.5873	41.6259	42.3588	43.073	43.0907	43.743	44.2127	44.2268	44.6437	45.3271	45.1684	45.3684	46.147	45.7585	45.6881	45.7672	46.4543	46.298	46.1868	46.2751	46.9274	46.418	46.8741	46.726	47.4525
	33.3761	33.3165	33.9098	33.8873	33.4601	33.2112	33.0136	32.9154	32.4052	33.2465	35.819	34.7917	34.4739	34.8674	35.4296	36.8982	37.5503	37.7159	38.2172	39.2502	39.8843	40.3851	41.3717	41.2887	41.7663	42.0383	42.5232	42.7231	43.282	44.4639	44.5332	45.3074	45.4014	45.9233	45.8373	45.6713	46.7045	45.8412	46.2739	46.7307	46.7388	46.6321	46.7954	46.9916	47.0869	47.4691	47.4377	47.4374	46.9645
	35.053	35.1465	35.2884	35.2221	35.2142	34.8174	34.5938	33.8385	34.2427	34.4611	37.476	36.6359	36.0351	36.7003	37.0619	38.2029	38.5582	39.1855	39.5407	40.49	40.7985	41.3232	41.8192	42.3803	42.2341	42.4903	42.9675	43.2828	43.7349	44.6865	44.8055	45.4488	45.5715	45.788	46.3056	45.8736	46.6734	45.8938	46.725	46.3916	46.6986	46.4224	46.7674	46.8196	47.6219	47.3283	47.4735	47.4099	47.0352
	37.7991	38.2359	38.0439	37.9421	37.8833	37.65	37.3174	37.7545	36.927	37.6979	40.5483	40.3543	40.0511	40.5338	41.0483	42.0363	43.1552	44.1035	43.8583	45.2038	46.0994	46.365	47.2928	47.3404	47.6889	47.9409	48.6153	49.042	50.0347	50.3349	50.365	51.4115	51.6409	51.3967	51.9329	51.8407	53.3498	51.9174	53.6717	52.6687	53.627	53.4477	53.8386	54.2247	54.743	54.3423	54.2971	54.3438	54.5947
	34.5412	34.9622	34.9098	35.2408	35.0473	34.7783	34.8131	34.5109	34.439	34.0175	37.6411	36.546	36.1851	36.6231	37.0208	38.2126	38.8594	39.0521	39.3719	40.1116	39.7239	40.0388	40.6394	40.9703	40.475	40.7847	40.9247	40.662	41.4116	42.0127	41.8248	42.9468	41.8226	42.4901	42.3935	42.5196	43.5274	42.9093	43.1515	43.3709	43.5525	43.8776	43.4461	43.4245	44.6	43.995	44.5701	44.4538	45.3153
	43.646	43.3331	43.5823	43.461	43.0881	42.9163	42.2998	42.1381	41.7946	41.9881	45.027	43.5938	42.7577	42.875	43.0518	44.0195	44.7078	44.8338	44.9945	45.7248	45.4206	46.1093	46.4502	46.5285	46.5129	46.786	47.2386	47.8018	47.7361	48.1777	47.6999	48.4397	47.909	48.8307	48.204	48.5278	49.4418	48.9353	49.5428	49.1793	49.4872	48.696	49.44	48.9129	48.9197	49.2558	49.2005	48.9346	49.809
	36.3331	36.319	36.213	36.2492	35.9392	36.523	35.9311	37.1041	36.9654	37.2267	41.1476	41.1505	41.3601	41.9673	43.263	45.5684	45.8863	46.9943	48.1811	49.5316	50.3636	51.747	52.0824	53.3524	53.6244	53.9429	55.5503	55.9274	56.1514	56.9803	57.372	57.8424	58.0114	58.4964	58.1863	58.229	58.9495	58.2643	58.8782	58.8709	59.4069	59.0299	59.0355	58.7909	59.214	58.6089	58.6006	58.3415	58.8029
	32.9689	33.2509	32.8821	32.5914	32.7857	32.6946	31.9992	31.7826	31.3629	31.5313	34.9466	34.4759	33.9143	34.998	35.0556	35.9635	37.1024	37.3084	37.4257	38.4498	38.4796	39.2198	40.0567	40.5048	40.5368	41.3897	41.6643	42.3254	42.4787	43.4763	42.8354	43.8209	43.7522	44.2405	43.8735	44.3791	45.2782	45.0812	45.5873	45.1614	45.6912	45.7012	45.9126	45.9674	46.9603	47.4081	46.4533	46.7508	46.6887
	26.6327	27.2384	26.8827	27.7704	27.0235	28.0451	27.2911	27.4069	27.1275	27.608	26.0481	26.1398	26.8655	27.9629	28.1096	29.3229	30.6911	32.0212	33.4742	34.5016	35.6884	35.6502	36.8577	38.3365	39.9812	40.6248	41.0808	41.2296	43.1257	43.453	43.8946	43.8946	44.7568	44.9102	45.5617	46.2545	46.3615	45.9537	46.6033	46.7027	47.6509	48.1162	48.2341	47.6141	49.1601	48.1593	48.8026	48.9061	48.9873
	38.2603	38.5086	38.0382	38.814	38.8599	38.8672	38.7112	38.3433	38.2916	38.2611	44.0434	44.3418	44.8609	46.5213	47.5987	48.9873	50.2571	51.6868	52.8141	55.7844	56.1672	58.0296	59.3756	59.884	60.7724	60.5231	61.4355	62.4155	63.751	64.4213	64.9025	65.5951	65.4359	66.1034	67.3075	68.2086	69.0922	67.8052	68.8328	68.7567	69.1799	69.3207	70.6083	70.4199	71.7143	71.0504	72.0913	72.5357	72.4834
	36.7116	37.0067	37.1251	37.3454	37.4145	36.6748	37.046	36.6005	36.2077	37.115	36.6314	35.217	35.1537	35.6825	36.6201	38.6222	39.4525	40.5724	41.6238	42.6486	43.5802	44.4916	45.779	45.7942	46.1279	46.9898	47.9682	47.7179	48.6397	50.5073	50.1183	50.6404	51.1152	51.2878	51.9829	52.4565	53.1625	52.7645	53.1676	53.7526	53.7056	54.3727	53.9156	54.7634	54.8276	54.7778	54.5177	54.4309	54.567
	24.6303	24.7904	24.7345	25.6832	25.2723	25.6878	25.3955	25.1056	24.7841	24.541	29.4293	28.8165	29.0496	29.8585	29.9558	31.9406	33.1452	33.2561	34.1993	35.0276	36.2072	36.4992	37.3504	37.3043	38.0714	38.7108	39.5712	40.5655	40.9828	41.8274	42.2172	42.3596	42.57	42.6401	42.3054	42.8403	43.6941	43.1941	43.0698	43.3151	43.4578	43.2391	43.2169	43.4541	43.5945	43.058	43.6342	43.031	43.0333
	29.7986	29.7628	29.7635	29.8933	29.6517	29.4908	28.9937	29.0975	28.9918	29.024	30.7066	30.8932	31.0631	31.6132	31.9442	33.6624	34.6678	34.4071	35.8863	36.3931	37.3505	37.121	38.277	38.3514	38.3224	39.6712	40.1942	40.5354	41.294	41.8108	42.4741	42.6965	42.4348	43.2849	42.9171	43.8429	44.7021	43.9403	44.2237	44.722	44.6321	44.6569	45.4261	45.3505	45.9015	45.9603	46.2576	45.696	45.8225
	34.9133	34.9666	33.9641	34.2265	34.146	33.842	33.2615	33.1428	33.118	32.738	36.598	36.7118	37.5296	37.3906	38.5634	39.9624	40.7093	41.1339	41.8346	43.5095	44.0188	44.98	46.0985	45.9215	46.7079	46.2063	47.0057	47.6573	48.859	49.6957	49.6066	49.4257	50.6202	49.9833	50.3101	50.7127	51.517	51.1096	51.4093	51.6378	52.0648	51.1216	51.3461	51.7658	52.525	52.7212	52.2403	52.7067	51.8601
	26.0596	26.0528	25.8085	25.7315	25.6061	25.5889	25.6976	25.5778	25.5868	25.6443	25.9106	26.6944	27.5926	28.7884	29.7082	30.5846	31.3623	31.9518	32.4068	32.5019	33.0144	33.8642	33.7788	34.1688	34.4301	34.5602	34.888	35.1907	35.1647	35.0871	35.4367	35.4597	35.442	35.6777	35.669	35.6791	35.4383	35.5406	35.5269	35.9027	35.6432	35.7404	35.3878	35.4367	35.1717	35.3381	35.2225	35.079	34.8924
	21.5196	21.4557	21.2605	20.9061	20.6987	21.2563	21.205	20.2552	20.5139	20.5505	21.4929	22.231	23.3278	24.7615	25.8914	27.4797	29.5235	30.9707	33.8057	35.0633	36.6978	38.4456	40.3853	42.2354	44.7895	46.4495	48.6784	49.5259	51.8982	53.7242	54.3615	55.9963	57.2054	60.2272	60.7066	61.9871	63.661	63.9349	65.1771	65.5873	66.4413	67.5299	68.1704	68.6882	70.2209	70.8411	72.9166	71.8615	72.5952
	20.8833	20.898	20.8381	20.6989	21.0955	20.9622	20.9574	20.9596	20.9156	20.6581	20.865	22.0604	23.828	25.0979	27.1386	28.5753	31.3223	35.1219	37.8223	39.1988	42.6708	45.0383	46.9537	48.4199	51.0821	52.9071	55.1092	57.5736	59.399	60.6195	62.6873	64.2249	65.3375	68.3149	68.1287	69.9273	70.148	70.4136	71.3296	71.893	71.1875	73.2171	73.2091	73.5884	73.9073	74.2325	74.0773	74.0437	74.288
	15.8796	15.7463	15.9605	15.7315	15.5891	15.2708	15.6759	15.2162	14.6115	15.3797	17.4321	18.1473	18.7175	18.9024	20.3779	20.469	21.1948	22.8137	24.2664	24.8858	26.2678	28.4731	29.9443	31.2345	33.3704	35.5853	37.4069	38.6106	40.7989	42.8006	44.6226	45.4921	47.2291	49.2855	50.6541	52.3706	53.3715	54.5372	55.2702	56.7035	57.566	58.5133	59.7343	60.2143	60.4467	61.9276	62.4741	62.4601	63.3892
	23.3543	22.9024	22.8509	22.715	22.6826	23.0234	23.9917	24.3279	24.4141	24.9699	24.6922	25.9632	26.8837	29.0815	31.3038	33.7379	36.51	39.5531	43.8301	46.4309	50.4945	53.9536	56.6329	59.8866	63.0847	66.0577	68.9598	70.7877	73.0398	75.2468	77.35	79.5878	79.713	81.1325	82.2558	84.1067	83.5622	83.9643	83.8722	84.1389	83.1018	86.0534	85.3596	86.2423	87.04	88.5142	88.3254	87.5572	87.1442
	29.1984	27.8623	28.326	28.4363	28.6877	28.9965	28.5803	30.187	29.9615	29.1903	29.7863	30.4793	32.3422	33.1512	36.7342	38.437	41.0309	43.2832	46.5949	48.6299	52.3286	56.1623	58.2773	61.0127	64.1216	65.9831	69.1921	70.4617	72.3306	74.242	76.144	76.508	78.0308	79.402	79.7874	81.7241	81.1551	81.8034	81.7011	82.0992	81.6091	82.9656	82.7818	83.4499	84.2269	84.686	86.5308	85.7025	84.0372
	25.7827	25.253	25.1801	24.8023	24.8373	25.6318	25.307	24.6227	24.8585	24.7188	27.1868	28.3355	30.5628	32.6974	35.2586	37.0439	39.6472	43.1749	46.9319	49.1356	51.6941	54.4495	57.957	59.8284	62.1641	64.1487	67.9729	69.1183	70.8295	72.5643	74.4134	78.1879	78.9039	79.6603	81.8279	83.1602	84.1497	84.2895	85.9706	88.4422	88.1561	89.4818	89.8747	91.0129	89.6235	91.8463	90.9496	90.5987	89.7696
	26.643	26.3955	26.7402	26.6511	25.8843	26.3276	26.0676	25.3337	25.7341	25.698	26.5802	27.9722	27.9275	29.7228	31.2338	32.5653	35.1868	36.3211	38.8477	39.9063	41.0626	43.5872	43.812	45.8579	47.9206	49.1769	51.0079	52.6165	53.4578	55.1832	57.2163	58.4447	57.9234	60.762	60.9484	63.4384	64.1236	64.133	65.1825	66.9396	65.6843	67.5316	67.8173	68.1881	67.8771	69.3055	68.8188	69.1616	68.7523
	25.51	25.1746	24.8739	25.1466	25.1603	24.8819	25.3871	25.0791	25.334	25.0204	24.0625	24.4912	25.6518	27.0001	28.8441	30.7204	32.9218	34.1555	37.2928	39.2854	41.573	43.214	44.9896	46.8386	50.3178	51.6446	54.3391	56.5499	59.2296	61.244	64.6051	67.2863	68.8174	72.9239	75.397	77.512	78.8363	80.9632	81.9945	82.0984	83.5388	85.0441	86.6506	88.7414	88.2038	89.8317	89.8723	90.9657	92.4474
	17.4804	17.63	17.7743	17.9385	18.0114	17.4743	18.0547	17.7825	17.827	18.192	19.1683	20.72	21.7182	22.5868	24.1318	25.8833	27.8369	29.9006	32.4393	34.0537	36.6956	38.8929	41.0471	42.8939	46.374	48.6572	51.2317	53.5604	56.7109	59.3336	61.9427	63.7512	65.1394	69.1322	70.9774	72.5219	74.2238	75.5663	77.583	79.4999	80.7401	82.2971	83.9631	85.4477	85.7516	85.6542	86.0213	86.3328	85.6592
	19.5226	19.3048	19.4444	18.7905	19.107	18.8467	19.238	19.339	19.006	19.3612	21.5633	23.5955	24.8922	26.268	27.879	30.0689	31.6588	34.1105	36.2693	39.1691	40.8006	43.4195	44.1597	46.2274	47.8431	49.8383	51.7389	54.0568	56.1795	58.5584	60.7618	62.5707	63.865	66.5411	68.1345	69.5007	71.2059	72.2941	72.7248	74.6695	75.4023	77.1731	78.356	79.5086	79.9629	81.0243	82.1563	82.6373	84.0858
	28.1941	27.2109	27.1054	26.6234	26.4298	26.0263	26.2894	25.8242	26.4439	26.6733	26.8515	28.1244	31.1412	35.5109	40.5512	45.7636	51.3999	57.9583	62.9232	68.4749	72.7973	78.2621	81.7927	86.2808	90.2058	92.836	96.6017	98.774	100.564	102.021	103.309	105.707	104.672	107.192	106.957	106.032	106.746	106.061	107.294	105.859	105.467	104.695	103.54	103.574	102.038	99.9816	99.4888	98.0431	96.0363
	26.1712	26.306	26.0898	26.1081	25.1124	24.826	25.5992	25.0328	25.4776	25.3063	26.1423	27.8221	29.2893	32.0556	36.1557	38.6982	42.1604	45.6038	49.1008	52.135	55.1428	58.3627	60.5496	64.1607	68.0086	69.4377	72.5174	75.3688	76.0829	78.5642	80.5529	82.7073	83.2955	85.1123	86.9559	87.2036	89.6149	88.8057	89.5504	88.9874	89.716	89.1517	89.8244	89.8603	89.1105	90.089	90.5896	88.9479	88.639
	31.7543	32.3809	31.8853	31.7275	31.4039	31.3326	32.0441	31.8666	31.0176	31.8672	31.8656	33.5852	34.1762	35.9596	37.1142	39.1378	40.2689	41.8218	43.7539	44.7252	45.7784	47.8956	48.4201	50.0147	51.0783	53.0805	54.0612	54.6962	55.9295	57.6321	58.1675	59.3281	58.6996	61.6082	62.7152	63.6874	64.6474	64.6192	65.2761	66.1473	66.5643	68.8464	68.9231	69.3616	69.9104	70.6322	70.8589	70.1029	70.4357
	29.3476	29.8503	29.2803	29.5032	29.0248	29.5031	30.0439	29.7164	29.8598	29.922	31.6959	32.4685	34.3881	36.3817	39.3869	41.8633	45.4982	49.2209	52.4174	56.1846	59.1073	62.5224	65.0846	67.8119	71.0278	73.9617	77.7243	81.3415	83.6221	86.2909	88.642	90.3559	92.1961	95.6379	96.6941	99.0399	100.155	101.875	103.133	104.868	105.413	106.438	107.557	107.65	108.423	109.184	109.395	108.832	108.95
	30.0194	29.3939	29.4843	29.2003	29.5756	29.7517	29.4461	29.814	28.745	29.8624	31.2538	31.8234	32.4775	34.7691	37.5591	40.9899	44.8436	48.4664	53.0183	55.7734	59.9534	63.0178	66.6798	70.0755	72.96	75.9111	78.4258	80.3657	83.0386	84.6446	86.1146	87.3475	88.7342	90.0866	89.5883	90.5726	90.7719	90.6288	91.3574	90.2298	90.4437	91.2242	90.4654	90.155	89.5828	89.9507	89.1654	87.1841	87.0924
	22.8584	22.4423	23.3158	23.1706	22.7936	22.8293	23.0356	23.1395	23.0721	23.0622	26.8443	28.2672	29.2006	30.3131	31.6518	32.9374	34.2441	35.428	37.275	38.2573	39.6402	42.4141	42.8325	44.3321	46.2024	47.5287	49.559	51.0984	52.6562	53.8386	54.8407	56.485	57.1931	59.6083	60.1936	60.7367	62.2137	63.2629	63.7108	64.1492	65.655	65.7159	66.8331	67.3538	67.5598	68.062	68.9275	69.2736	69.0674
	23.3691	22.9635	23.1247	23.6911	23.563	23.0145	23.3308	22.1069	22.9781	23.5967	24.3042	24.9511	27.125	29.5126	33.3903	36.571	39.6854	44.0901	46.7781	50.3179	54.4014	57.4993	60.3997	63.7221	67.0236	69.1108	72.3656	75.0303	77.4947	78.7609	80.7509	81.5862	82.4959	84.3471	84.527	85.5627	84.8043	86.2265	87.4362	90.2388	89.1055	89.6204	89.0009	87.7049	86.6335	86.7867	85.9917	85.3374	83.3777
	24.2059	23.3672	24.7785	25.1902	24.6951	24.2527	24.0142	24.6887	24.3787	24.628	25.0671	26.3836	28.501	31.4413	34.0316	36.7764	39.8405	42.5122	45.2291	48.2643	51.5622	54.9475	57.4389	59.9684	64.1259	66.7701	70.239	72.8877	76.0904	78.4154	81.1494	83.6239	84.9134	89.2572	90.8643	92.6203	94.5693	95.8685	96.1636	97.5856	98.5558	99.3268	100.363	101.469	102.059	103.476	104.119	104.029	103.783
	19.2888	18.7688	18.9234	18.5715	18.9025	18.4678	18.6437	18.4592	18.6621	18.2756	19.79	20.9354	22.369	24.4554	26.4665	27.3435	29.5044	32.087	34.1998	36.071	38.5894	41.1101	42.3127	44.0204	46.7227	48.52	51.228	52.6044	53.8257	56.063	57.8239	58.8698	59.6306	61.8059	62.6946	64.2507	63.9615	66.579	66.0922	66.9494	67.5616	69.0292	70.0219	70.4883	70.4915	71.3533	71.178	70.5707	71.1418
	18.9355	19.1934	18.6295	19.2374	18.7648	18.541	18.8082	19.2751	18.8759	19.3791	21.085	25.0103	27.964	30.1552	32.2754	33.2216	33.1626	34.0509	35.6936	36.0591	38.0763	40.2589	41.2062	43.4803	45.8004	48.0084	51.2059	53.3403	55.0394	57.859	60.1877	62.0806	63.4421	67.0603	68.5219	70.8644	72.0766	73.8869	75.3174	77.1253	78.0885	79.4062	81.3649	81.8181	83.1071	83.6496	84.5933	84.3384	85.4762
	25.4243	25.5701	25.1486	24.8378	25.4287	25.6783	26.0191	25.5426	25.6261	26.3249	27.0083	28.5446	29.6867	31.5988	33.0174	33.6681	34.7666	37.1244	39.3359	41.016	43.7391	46.0102	48.1024	50.5811	53.4705	57.2543	60.8258	62.7296	66.1101	68.7874	71.7087	73.6995	75.2961	78.3157	79.6164	82.1224	85.0371	87.792	88.8039	90.8341	92.4682	94.2996	94.3188	96.3598	97.3522	98.9528	100.559	100.809	101.841
	21.6273	22.0273	22.0516	21.6851	22.1777	21.5999	22.1658	22.0684	22.1371	21.9641	23.4861	24.7344	26.1163	28.1913	30.6737	32.138	34.3165	36.9963	39.2464	41.8995	44.4689	46.8538	48.6635	51.3845	54.1823	56.6051	59.7914	62.7192	65.5322	68.4057	69.9617	71.5692	72.7923	75.5308	76.4494	77.8369	78.7537	80.7012	81.9764	83.3293	84.1153	86.0566	86.5118	87.2813	88.8685	89.3969	90.3699	89.9462	89.9684
	20.9921	21.3146	21.6683	21.4382	21.3373	20.8009	21.0296	21.0985	21.3763	21.0514	22.779	24.1607	25.745	28.2705	30.6854	32.1191	34.0162	36.1726	38.4453	39.6431	43.6158	45.9277	47.9565	50.3695	53.9676	56.4917	59.2178	61.6413	64.9447	67.8817	69.9389	71.5616	73.3222	76.9115	77.3498	79.3965	81.3158	82.1513	83.4074	85.4517	86.3196	86.7089	88.4552	88.7153	88.3508	89.164	90.4738	88.9141	89.7303
	27.3223	27.0681	27.1646	27.2066	27.5218	27.183	27.3903	27.2196	27.9885	28.7154	31.0671	32.1297	34.0435	35.9697	38.5278	41.0773	43.9648	46.9295	50.4578	52.6238	55.7247	58.395	59.751	62.2623	64.7034	67.284	69.9186	72.637	75.1746	78.0648	80.4407	81.9149	84.2166	88.4529	91.0812	94.4216	97.6672	100.242	104.307	106.924	109.285	112.085	113.044	115.097	115.446	117.987	118.878	118.713	118.882
	26.7665	25.7602	26.449	25.4306	26.0669	26.5463	26.3723	26.195	26.1127	26.489	28.9886	30.2353	30.9172	33.1616	35.0021	37.7147	40.1304	42.0863	45.6519	47.9001	50.3993	53.2504	55.4848	58.7715	61.7495	63.428	66.0481	69.2196	71.1987	74.3031	75.6275	76.5685	79.4234	82.4273	83.303	85.7284	88.0547	90.0781	91.6849	93.9061	94.2062	96.5586	97.3739	97.9947	97.4347	99.6962	100.368	99.668	100.457
	34.1407	33.4447	33.7121	34.3926	34.4756	35.4451	35.8574	36.161	35.4353	36.0143	36.0872	37.8946	39.2774	41.2151	44.2514	46.1903	47.3683	50.9409	54.5016	57.0931	60.2548	63.1886	65.9662	69.2853	74.1189	76.9707	80.381	84.9785	87.9929	91.416	93.8889	96.5344	97.1787	100.255	101.174	104.63	105.332	108.008	108.587	111.688	110.733	111.833	112.568	113.638	113.086	113.967	115.962	114.017	114.503
	29.5166	28.907	28.6782	28.8175	29.3676	29.8932	29.581	30.1035	29.2658	30.1519	34.37	34.428	35.2803	36.2211	37.082	38.0059	39.3104	41.3116	43.436	44.7349	46.5203	48.5694	49.8386	51.731	54.2564	56.2249	58.4391	59.9736	62.5853	66.526	67.8054	68.6026	70.2285	72.7807	74.9057	77.1061	78.3541	79.8115	82.7291	84.6103	85.8975	87.7414	89.6662	92.7346	92.8148	93.6738	94.1495	95.6691	97.2052
	28.3785	28.4791	29.1797	28.5629	28.6209	28.6923	28.8007	28.2733	29.1266	30.2348	30.4585	32.2049	33.6062	35.4298	38.6392	41.0563	44.1292	48.0435	51.5814	55.4478	58.3256	60.5968	64.2397	66.739	71.1674	74.043	77.9295	79.6401	82.6393	85.9012	88.2571	90.1491	91.6902	95.924	97.0725	99.1267	99.4522	102.265	103.929	104.754	105.018	107.134	107.463	108.803	108.99	110.042	109.742	109.317	108.769
	27.6149	27.6364	27.3954	27.0756	26.9926	26.865	27.0433	25.8122	26.4886	26.7098	28.3905	29.6762	31.1055	33.7095	36.798	39.7777	43.4324	46.6482	51.1051	54.1012	58.2025	60.9369	63.4803	66.8258	69.7254	72.188	74.8491	76.0813	78.1225	79.5307	81.8065	83.1409	82.9637	85.3368	86.7837	87.2994	87.3826	88.5531	88.9148	89.052	89.2307	89.4205	90.0567	89.6731	89.4858	89.835	89.6952	89.437	88.7602
	22.5447	22.5873	22.4897	22.3742	21.7778	21.1822	21.8114	20.869	20.5037	21.4424	20.9167	22.4593	23.5289	25.0102	26.5454	28.2379	30.5258	32.0778	34.811	36.5835	39.2467	40.6877	42.473	45.0708	47.91	50.3288	53.515	55.2764	58.5321	61.508	64.4404	66.7063	68.0439	71.1495	73.6383	75.3676	77.2792	79.3939	80.5438	81.939	82.6556	84.5144	85.1112	86.0981	86.63	87.2704	88.5534	88.1699	88.3669
	22.1304	21.9359	22.0961	21.9535	21.5551	21.566	22.2399	22.219	21.402	22.078	24.004	25.3479	26.8061	28.735	30.9592	32.9243	35.9546	38.2345	40.7001	43.1182	45.9473	48.6681	51.0093	53.2369	55.8541	57.3784	60.2261	62.4767	64.7558	66.8287	68.3653	71.1792	71.5779	75.5428	76.8662	78.953	80.1619	81.6299	83.6375	85.2204	85.4558	87.6039	87.6552	88.7408	90.1467	90.028	90.3044	90.0373	90.888
	23.5326	22.9386	23.3029	23.7605	23.4114	23.0868	23.2569	23.7141	23.5295	23.5285	23.8871	25.381	26.7534	28.4565	30.9988	31.7891	34.942	36.5357	39.327	41.6271	44.1972	46.5156	48.3829	51.0523	53.1439	55.7024	58.1793	59.5008	61.0189	63.3895	64.9696	66.8098	66.8189	69.7138	70.6706	72.7529	73.2109	73.5086	74.4539	75.1848	76.2493	77.0184	77.4432	78.4889	77.9699	79.395	79.5731	78.6952	79.9069
	27.769	27.1467	27.6541	27.9703	27.231	27.9018	27.491	27.0677	26.4243	27.3641	28.9423	29.1068	30.694	32.4262	33.7589	34.5084	37.3227	38.3383	40.5793	42.2284	43.9222	45.3897	47.0028	48.3897	50.4872	51.6538	53.3824	54.6849	55.8471	56.6209	57.3751	58.6177	59.4131	60.8776	60.9337	61.6213	62.7103	63.3735	63.6247	64.5449	64.5275	65.0937	65.2677	65.2924	65.1452	66.1723	65.4901	66.6232	66.2537
	32.0039	32.8038	32.4517	32.0991	31.7132	32.0252	31.9029	31.7518	30.7358	31.8135	31.8252	33.5913	33.5649	35.4751	38.238	38.4971	40.7891	42.9807	44.7528	45.6815	47.975	49.6641	50.4797	51.6252	52.7149	54.5284	56.0217	57.1977	58.1989	59.1852	61.2921	62.1255	61.1914	63.9236	64.467	65.9845	66.7423	66.659	66.9833	67.6726	67.7726	68.3664	69.0716	70.0118	70.3639	70.3214	70.2174	70.8831	70.6816
	20.4452	20.792	20.2053	20.0039	20.3075	20.1951	20.1378	19.8511	19.8301	19.7967	21.2185	21.9164	24.0112	27.9057	31.8828	36.2903	40.6159	45.7522	50.438	54.2786	58.2183	62.399	64.6705	68.0802	70.4197	73.03	75.7135	77.3792	79.8634	81.3442	83.1097	83.2133	83.6742	86.0198	86.7783	86.6181	86.179	86.5144	86.5338	87.148	85.678	86.288	86.9277	85.5232	84.3879	84.5671	83.8232	82.6281	81.4755
	17.0607	17.6179	17.5168	16.9944	16.9268	17.2193	18.0374	17.4867	17.9355	18.0837	19.1079	20.5801	21.0403	24.4511	26.5745	28.2392	30.5773	32.7636	35.6149	37.1229	39.866	42.3996	44.2007	46.7286	48.9158	50.8092	52.864	55.0838	57.2471	59.0184	61.6578	63.1362	64.3281	67.3022	68.7316	70.7628	72.3446	73.365	74.4373	76.3044	76.968	78.7001	79.6389	80.5133	81.7754	83.7242	83.717	83.6463	84.6755
	26.2795	26.4789	26.8131	26.3452	26.2118	26.1577	26.4608	25.9248	25.6565	26.6431	27.9582	28.8957	30.7328	31.6317	32.9648	33.9918	35.5438	36.9212	37.8693	39.884	40.9071	42.5997	43.7683	45.0108	46.7664	47.3873	48.6581	50.2564	51.2508	52.7271	53.9161	54.832	54.7092	56.9561	57.5517	59.1193	58.9682	60.6994	61.4444	62.0271	62.3742	63.6525	65.1811	65.6474	65.7436	66.6161	67.2294	67.6979	67.8623
	21.6683	21.2036	21.2069	20.5678	21.0449	20.7118	21.3928	19.9637	20.729	21.151	22.8594	24.0569	25.4801	26.5505	28.3334	30.4898	32.565	34.9357	37.482	40.9312	43.5921	47.0515	48.4656	52.7127	54.8468	56.8323	60.8469	62.9338	64.3333	68.3637	70.5029	73.4477	74.6738	79.4184	80.7193	84.1697	86.3643	88.8957	90.5705	92.6581	94.7442	98.4999	99.3016	100.096	102.155	103.699	104.402	104.769	107.296
	22.5861	22.6631	23.3393	23.542	24.3456	24.368	24.1117	23.9582	24.0962	24.2882	24.3245	25.1528	26.7076	28.5208	31.2579	33.7348	36.2767	38.1263	40.8303	42.411	44.7229	47.4257	49.2521	51.9139	53.6916	54.9395	57.4215	58.9937	61.9459	63.7897	65.1142	66.0772	66.783	69.6135	69.4568	71.6487	72.3172	73.8963	75.2958	76.0437	77.0587	77.6181	78.8815	78.794	78.9418	79.0242	79.9915	80.2202	80.4498
	33.4949	33.3676	32.596	32.4127	31.8559	32.0097	32.5101	32.3489	31.1217	31.6211	32.278	33.7162	35.3577	37.4936	38.3977	41.8729	44.4279	47.4495	50.8107	53.4106	57.0433	59.8409	61.3222	63.3206	65.2631	68.5382	70.2739	72.8516	74.126	76.5798	78.5824	81.1103	81.1052	84.7731	85.306	87.1097	89.5065	89.3595	91.6316	89.6568	90.5173	92.2618	91.4239	92.7257	92.9294	92.8687	92.2714	92.063	91.7171
	44.8909	45.6342	44.1013	44.4814	44.2298	44.2218	43.677	43.5469	43.5238	44.3097	45.0321	45.4999	47.0531	48.9032	50.8021	52.5727	55.8757	57.8623	60.9216	62.1545	65.2486	67.2758	68.7586	70.5484	72.0552	74.1997	75.3289	77.4198	78.9676	81.082	81.9114	83.608	83.8883	86.8687	87.3093	88.454	89.2054	90.3612	90.1986	90.2757	90.5336	91.7223	92.8865	92.68	92.6161	93.7234	93.3527	93.909	92.6316
	35.6846	35.5599	36.1924	34.9507	36.4986	35.2943	34.8039	35.0106	34.1912	35.3962	35.9898	37.4546	37.5944	38.6804	41.6144	42.5666	44.2022	45.1477	47.5301	49.3909	51.1813	53.8511	55.1211	56.6176	59.5858	60.3035	62.9366	64.0365	66.1841	67.1998	70.2159	71.2548	71.8558	74.6188	73.9445	76.9748	75.675	77.4191	78.3914	79.0373	79.1058	79.5832	80.7005	80.596	80.5407	80.3369	80.7989	80.2642	80.2341
	17.5646	18.1381	18.3561	18.1375	18.0604	18.8849	18.2592	17.767	18.0061	18.6537	20.1268	22.0193	23.4041	24.3556	26.2189	27.3666	29.5206	30.6178	32.5052	34.2534	35.7875	38.2456	39.2323	41.4451	44.0999	45.0066	46.6832	47.9139	50.408	51.9431	53.6182	55.8855	55.746	59.0664	60.3658	62.0107	63.7955	65.4729	67.0226	69.0599	69.6005	72.3068	74.1366	74.8785	77.0616	77.4403	79.212	80.3555	80.7764
	21.1104	21.4608	22.0385	21.7566	21.5107	21.2149	20.9523	20.8053	20.7297	20.7547	21.3465	22.7229	24.421	26.2443	27.2316	27.9317	29.6213	31.5889	33.7198	34.7081	36.7236	38.5603	40.0131	42.6613	44.0298	46.1112	47.5121	49.8121	51.6199	53.6147	56.1017	56.9169	57.9639	60.5113	61.9816	63.3928	65.0359	65.4574	66.9226	68.0739	68.6801	69.8202	70.726	71.3215	71.1414	72.5317	72.847	73.0618	74.0168
	23.3939	22.7878	22.9417	22.6928	22.1161	22.2039	22.3032	21.7223	22.2696	22.2723	23.3687	24.3862	24.6261	26.2166	28.6442	29.4144	31.8449	33.5388	37.1921	40.2653	44.4478	48.8839	52.3194	57.2385	61.4774	66.0439	70.0702	73.6237	78.3533	81.3118	83.51	85.5796	86.6392	89.6007	90.8777	92.112	92.7498	93.5448	94.0398	93.8649	95.2927	94.7368	94.6851	94.2849	93.35	93.8607	92.9993	91.2426	90.1159
	36.8539	36.1095	37.2787	37.0462	36.8818	37.1796	37.9591	37.7082	37.4053	38.0565	49.304	51.0128	53.5805	56.1111	60.1278	61.8893	63.5254	66.7325	69.997	72.5512	76.9627	80.1207	84.2274	86.6239	90.3718	93.384	96.3828	98.9614	100.94	103.919	107.167	109.054	109.809	112.694	115.482	116.211	116.897	118.414	118.941	120.329	120.585	121.957	122.612	123.565	123.183	124.757	125.807	125.73	125.004
	31.1944	31.5643	32.1896	32.4565	32.1326	32.4545	32.3873	32.5423	31.7055	32.6589	32.8047	34.8562	35.4454	37.2234	39.387	41.5115	44.2406	46.2167	49.1293	51.5185	53.7048	56.6215	58.2849	60.0385	62.4621	64.4234	67.3756	67.9039	69.9781	72.3949	73.9879	75.28	76.2738	78.4996	79.5719	81.4307	81.9593	82.9657	84.0572	84.2423	85.3615	86.7189	86.7768	87.267	88.4445	88.4143	88.153	88.6679	88.5627
	31.3264	30.6456	29.6973	29.3643	29.0233	28.8544	28.9882	28.1256	28.5713	28.861	31.1978	31.4466	34.0898	37.4248	41.8543	44.9358	47.7066	51.2656	54.8879	57.3323	60.5335	64.1357	65.8328	68.9062	71.1549	73.9448	76.3845	78.0381	80.6002	82.1935	84.4827	84.9873	85.4408	88.2191	87.7126	89.1531	88.9724	88.5467	89.4975	89.0414	88.9177	88.7059	88.6311	89.3797	88.3664	89.075	88.6572	87.5415	87.281
	27.3264	27.0645	26.4951	26.3628	26.6746	27.1018	26.2612	26.8739	26.5125	27.2562	28.2755	29.0048	30.0056	31.5383	33.3672	33.6169	35.5851	37.7537	40.0481	40.3875	42.3961	44.8736	44.7539	47.8058	48.7486	51.1171	51.7674	53.0205	54.9507	56.2953	57.2356	58.1062	58.3588	60.8606	60.9241	62.1318	62.1636	62.5495	63.6897	64.7399	65.78	65.9499	66.1538	66.508	66.7582	67.0605	68.1044	67.77	67.1202
	26.2427	25.9982	25.7885	25.9819	25.2469	25.3056	25.3776	25.1414	25.0845	24.9949	26.1525	27.5412	28.6429	30.5277	32.3636	33.5857	35.3045	37.1353	39.2078	41.8215	44.2882	47.5259	49.8487	52.2097	54.9583	57.3766	60.5818	62.1726	65.1463	67.1228	68.9284	70.135	70.9624	75.0072	75.726	77.7095	77.4087	78.3251	78.9211	80.2243	80.858	81.838	82.2664	82.1376	82.7312	82.5047	82.6603	82.4384	82.724
	27.2229	27.0842	26.2094	26.7989	27.0001	27.0078	27.8292	27.3123	26.9041	27.1991	28.5294	30.046	31.071	33.1883	35.863	37.2608	40.1874	42.667	45.5561	48.2837	51.965	54.4099	57.0365	61.0426	63.46	66.1518	68.1912	71.2343	74.3595	76.4568	78.6235	80.2674	80.9408	84.3418	85.7794	87.3369	88.8444	90.1088	91.476	92.4846	93.6143	94.3141	95.1815	96.3254	96.6562	97.7124	98.7787	97.8107	98.1374
	20.8905	20.5626	20.6923	20.6499	20.3651	20.2671	20.4455	20.7701	20.2477	20.2957	22.1261	23.3315	25.2165	27.1968	29.7982	32.2378	34.5483	37.7394	40.7687	42.9531	47.258	51.1722	53.6102	56.3946	59.9494	63.6544	66.9829	70.3476	72.7864	75.3799	78.7681	80.3857	82.6176	86.182	87.1261	89.823	90.7725	92.7675	93.087	94.9503	96.3578	97.2253	98.6487	98.9621	99.6577	101.092	101.252	101.684	101.984
	38.3121	38.6586	37.9653	38.0375	37.9919	38.6624	38.2861	37.7308	38.5023	39.2553	41.3796	43.3076	44.1341	45.9835	48.413	50.9514	55.6368	59.1651	64.2044	67.6051	73.1291	78.9004	83.0571	86.7414	90.6367	96.1741	99.499	104.661	109.946	113.205	116.944	120.696	123.556	129.338	133.141	137.294	138.842	140.465	143.343	143.607	146.128	146.792	150.214	149.091	149.388	150.224	151.148	150.637	149.636
	35.3346	36.2302	36.1348	36.2113	35.7659	36.2493	36.035	36.2598	35.9562	35.7714	38.0633	39.1261	40.5878	42.416	45.0253	47.8774	51.9655	55.476	59.3673	63.204	68.0944	72.6916	76.2159	80.1759	84.0187	89.1105	92.5785	96.4588	99.5946	104.347	107.496	110.842	115.272	119	121.961	124.603	125.868	129.472	129.923	130.769	131.64	133.552	135.011	135.078	136.41	136.763	135.917	136.072	135.066
	26.3904	26.2289	25.4755	25.9061	25.5237	25.6703	26.3554	26.0988	26.1923	26.4605	27.5052	28.5581	29.4474	31.3541	33.0744	34.2084	37.3412	39.6282	42.3038	45.3174	48.001	51.894	53.2763	57.124	60.5942	63.538	65.9082	68.2924	70.6097	74.2701	76.7114	78.5497	79.5554	82.8713	84.1961	86.728	87.1097	89.5946	90.5295	92.7263	94.1398	95.6902	97.5236	97.8568	98.8449	99.0489	99.4877	100.2	100.896
	17.0965	17.494	17.3518	16.9624	17.4918	17.1449	17.506	17.005	16.9137	17.503	19.0175	20.5722	21.5363	21.9279	23.0909	23.5778	24.9926	25.4212	26.8098	27.7087	29.1478	30.6929	32.1558	33.0193	34.2716	35.5821	37.2621	38.7245	40.666	42.3055	44.1228	45.5128	46.9563	49.2812	50.3223	52.3829	53.2659	55.4517	56.2454	57.2819	58.4223	60.4552	61.2915	62.3075	63.1055	64.2	65.8671	66.1315	66.7088
	24.4776	24.6667	24.4836	24.6103	24.3453	24.555	24.8649	23.949	23.8662	24.906	26.4828	27.6343	28.2826	29.8465	31.8807	34.0437	35.688	37.3379	39.1296	41.3323	43.6952	46.0083	47.2187	49.8454	51.7483	54.263	56.0904	58.5447	60.6321	62.6267	64.1526	66.2528	67.0111	69.5246	70.4671	71.9441	72.4532	73.9079	75.1837	75.1703	76.4602	77.8913	79.0213	78.7758	79.8548	80.6188	81.2013	81.1623	81.0228
	28.6258	28.676	28.8361	28.7057	28.0549	28.1479	28.7493	27.8414	28.0621	28.7876	29.9055	31.5419	33.2469	35.6659	38.5605	41.948	45.4619	49.2066	53.4678	56.9106	60.5321	64.3162	67.2892	72.1181	75.6208	79.1667	83.5598	89.0543	92.8453	96.9615	100.632	104.77	107.365	111.854	114.078	115.032	114.795	114.966	115.007	115.118	114.666	115.007	115.653	114.473	114.303	114.166	115.007	113.36	113.137
	25.1284	25.2424	25.5346	25.0869	25.2962	25.1814	25.8296	25.6576	25.1453	25.765	27.9115	29.1017	29.5054	31.637	33.9533	35.6886	36.7324	38.9114	41.4294	43.5326	45.8518	48.7807	50.0325	51.7436	55.8179	56.9789	59.8189	62.088	63.4184	65.6319	68.7983	70.7162	71.5495	74.8604	75.5568	77.5022	79.6706	82.4469	85.2696	86.3552	88.4382	90.8254	92.0789	94.2288	95.6566	97.0222	98.6853	99.3059	99.2845
	27.3327	27.835	28.7143	29.7145	30.7127	30.2411	31.5297	31.6593	30.3406	29.8565	30.1192	31.3708	31.3534	32.2735	33.773	35.1959	37.3909	40.7286	43.104	44.6934	47.1616	50.5617	51.9688	55.3112	58.3738	61.1145	65.081	68.6397	70.6076	74.4609	77.2431	79.8983	80.5657	83.767	85.6483	87.6312	88.4605	90.3229	90.8826	92.5623	91.6657	93.9097	94.518	95.2918	94.5013	95.3931	95.9184	95.3513	96.0654
	22.5389	22.4287	22.8863	23.2948	23.8107	23.9592	24.1273	23.0411	23.6484	23.9647	25.1752	26.0034	27.78	28.563	29.9928	31.3365	33.7042	35.3324	36.7037	38.37	40.6417	42.699	45.3507	48.1933	50.6637	52.8524	55.3255	59.0798	59.8342	62.867	64.7489	66.586	67.9936	71.0344	72.6062	74.4027	74.8173	77.159	77.8674	79.8999	79.4126	79.7704	80.3268	81.1804	80.7359	81.391	81.7393	80.7812	80.6522
	21.4068	22.7658	22.6902	21.8736	21.6868	21.7542	21.5858	20.9233	21.0486	21.231	24.2617	24.8909	26.6681	28.5816	29.7655	32.0746	34.8534	37.6478	42.0792	43.9469	47.3666	51.1696	54.6894	57.8443	61.2238	64.6747	68.2924	69.8628	72.3013	74.7299	78.2029	79.3019	80.8686	84.2	86.0678	87.0002	87.3199	87.4004	87.9036	88.6898	88.4795	89.0519	89.4768	89.2028	88.581	89.6221	89.0715	89.0427	88.3709
	24.9706	25.0561	25.5029	25.1655	25.2422	24.9373	25.8331	25.2578	25.0691	25.4653	27.6852	29.3026	29.9864	32.5808	35.4832	37.2256	40.0376	42.4843	45.6558	48.6669	51.1547	54.3147	56.2419	59.6079	62.6484	65.9218	68.9149	71.6327	74.7539	77.4154	79.4583	82.2146	83.374	86.7571	88.5748	90.384	92.2805	93.8787	95.3645	98.05	99.8915	102.135	103.538	105.254	106.212	107.869	110.414	110.076	110.818
	20.6649	21.1088	20.7819	20.8597	21.154	20.7641	20.7423	20.3115	20.8041	21.458	22.3934	23.6167	23.9675	25.9297	27.9199	29.045	31.643	34.6992	37.2621	39.3265	43.1288	46.4521	48.4057	51.3533	54.7516	57.5012	61.176	64.0092	65.8325	69.154	72.0023	74.0631	75.1979	79.1804	80.6792	83.6563	85.4553	88.2146	89.5435	90.8329	92.0483	93.878	95.034	96.6712	96.6944	98.1682	98.692	98.5846	99.0486
	24.771	25.1958	24.8141	24.7579	25.2898	25.0178	26.0286	24.7955	24.7885	25.2904	27.2664	28.317	29.7547	32.3498	33.8642	36.5865	38.6551	41.3915	43.2485	45.8146	47.9238	50.2581	53.243	54.0336	57.3678	59.9981	61.8838	63.6766	66.0772	67.463	69.6473	71.1065	71.6007	75.1512	76.0315	78.068	78.4262	80.1998	81.843	82.0849	83.4043	83.9868	84.7882	85.6478	86.9837	87.9763	88.1418	87.8705	87.7743
	27.2157	27.3482	26.6661	26.603	26.9132	26.4497	26.6511	26.3014	26.0804	26.481	27.8399	29.0583	30.0608	31.5633	33.894	34.8307	36.1783	38.0864	40.2299	41.3545	44.9694	47.3324	48.3821	50.0805	52.287	54.1385	56.1815	57.197	59.7617	61.486	62.1017	63.5697	64.1984	66.9218	67.2726	68.2506	68.9322	69.9715	70.5018	71.5004	71.4768	72.2785	73.7136	72.8638	72.75	73.7359	73.3654	74.1983	73.5644
	27.0999	27.0593	26.9368	27.2818	26.7701	27.1818	27.4822	27.1968	26.7247	26.8798	27.7044	29.6551	30.5636	34.093	37.5107	40.6127	45.6476	50.2287	54.3649	58.0636	62.6041	65.4327	68.9899	71.5162	74.6028	77.1615	79.925	82.748	85.1599	86.6741	88.3117	90.599	91.5309	94.2224	93.2298	94.9786	95.0452	95.2209	95.3735	94.8186	94.4433	95.4431	94.772	94.4456	93.5248	93.3176	93.679	92.6508	91.4468
	17.1947	17.235	17.0328	16.9399	16.7401	16.457	16.6608	16.0871	16.6113	16.7983	18.822	19.9001	21.0166	21.758	23.5481	24.6963	27.0173	29.7521	31.7057	33.8481	36.6845	40.5245	43.2425	45.4056	48.6213	51.6398	53.986	56.3695	59.0251	60.9844	63.4514	65.1589	66.7088	69.545	70.7424	73.008	74.8093	76.5384	78.3965	80.581	81.8786	83.064	84.7022	86.9615	87.2311	89.6342	90.9297	92.0581	91.9814
	31.2474	31.8257	31.5114	31.9804	31.4316	32.9671	32.7368	32.3972	33.0722	32.2789	34.3657	36.6834	37.919	40.2973	42.5691	44.7528	46.3287	49.3441	52.4963	59.5951	68.0459	76.951	82.8862	89.507	93.4021	97.1067	99.2181	107.447	115.713	121.145	121.537	121.246	119.857	120.114	119.424	120.45	118.793	118.702	118.501	118.681	117.352	116.411	116.413	116.178	115.402	115.132	114.787	114.819	114.142
	18.1822	18.0764	17.9945	18.3422	17.5521	17.5789	18.1079	17.3124	17.9747	18.3406	19.4636	20.0053	21.1619	24.202	25.7158	27.7763	30.0256	32.3331	34.746	37.0666	39.9668	41.9165	43.7544	46.7815	49.7821	52.9167	56.3998	59.3998	62.0398	64.78	67.6745	71.2462	74.1272	78.5058	80.3913	82.1241	84.2058	85.1226	86.6752	87.9089	88.8752	90.3478	90.8272	90.1643	90.7779	91.8387	92.2049	91.609	90.4633
	36.1048	36.2633	35.5093	35.6789	35.3577	35.8366	35.6079	35.0171	35.0397	34.5422	34.0033	33.2738	33.1667	34.0747	35.2906	34.5191	34.2482	34.0399	33.8766	33.9689	32.9405	32.8148	33.483	33.4056	34.8561	35.6737	35.5871	35.9971	37.1577	36.1165	37.0986	37.7088	37.5143	39.4036	39.3252	40.7018	41.4298	42.2808	43.6943	44.974	45.1965	46.9115	47.87	48.1304	48.9267	49.1418	49.6202	50.8199	51.1852
	23.8905	23.2766	22.4407	22.0694	20.9744	21.0283	21.1898	21.2886	21.2311	21.8525	23.6725	24.2004	24.0177	24.6155	23.7339	23.8532	23.3436	23.8485	22.1379	23.5693	22.062	21.6399	21.4093	22.1575	21.7857	21.636	22.0808	21.8493	23.3839	23.7527	24.6258	25.4952	25.7625	27.6257	28.2759	29.9209	31.8211	32.7142	33.5604	34.5293	35.769	36.5233	37.7497	37.9572	39.0584	39.1516	40.0559	41.2664	42.1297
	28.4508	26.688	26.4649	25.6091	24.7829	24.995	24.0054	24.1047	24.1077	24.8541	24.9777	25.5092	24.914	25.152	24.3036	24.3338	24.0238	24.5626	24.0363	24.1538	23.3893	23.4878	23.1506	23.906	23.7667	25.2063	26.2471	26.9971	28.8009	29.8619	32.0909	33.5141	34.8172	36.3279	37.6643	39.129	40.6263	41.2556	41.9976	42.773	43.2501	44.2537	44.8855	45.2625	45.3343	45.2022	46.2727	46.37	46.807
	36.6861	35.7486	35.8582	35.4097	34.7006	34.1847	33.9837	33.5076	32.9098	33.2159	33.5242	33.8684	33.4815	35.043	34.859	34.7012	34.4881	33.7579	32.944	33.6639	33.0236	32.812	33.9966	34.5179	35.1325	36.1107	35.804	36.3451	37.9329	39.0493	40.3459	41.2739	43.1684	45.3517	46.6503	48.2898	50.0736	51.5815	53.4666	54.773	55.0242	57.4485	58.8334	59.7207	61.8043	62.693	63.6699	65.4572	66.9251
	42.4102	41.264	39.6888	38.8066	39.0892	38.8297	38.9241	39.2995	39.5329	40.1387	43.4603	44.7877	45.1711	45.7392	46.4599	47.4179	48.1775	48.3704	47.0886	46.3302	45.5417	45.2719	44.903	45.0189	45.1089	45.1752	45.2551	45.6451	47.0201	47.8823	48.3331	50.6059	51.2693	53.6546	55.319	57.2171	59.1396	60.4063	62.4261	63.3666	64.5233	67.0942	68.1283	69.3011	70.2737	71.7051	72.6369	73.5824	75.4862
	20.997	20.4709	19.8257	19.5514	19.2415	19.007	18.7705	19.0393	19.0268	18.8658	19.3897	19.8893	19.4824	19.3869	18.6781	18.3577	18.5783	18.2321	17.619	18.4505	18.7247	18.5118	18.8632	19.0951	19.6235	20.281	20.9597	21.1165	22.801	23.3228	25.2247	26.0697	27.7938	29.1609	30.5797	31.9748	32.8721	34.2403	35.5098	36.7326	37.1871	37.6786	38.2986	38.7702	39.4517	40.1565	41.0124	41.241	42.3258
	27.5365	27.3124	26.0607	25.9535	25.3885	25.6614	25.0289	25.5323	25.4967	24.9125	25.1684	24.8521	24.6487	25.0008	24.6441	24.3896	24.1835	24.1724	24.0204	24.3306	24.023	23.4547	24.2274	24.34	24.0953	24.8196	24.6312	24.9389	25.9174	25.6111	26.6491	26.8003	27.4166	27.9272	28.9957	29.1943	30.7924	30.6773	30.9809	31.8362	32.3316	32.579	33.6492	33.8997	34.7204	34.7982	35.3792	35.8326	36.1999
	35.5415	34.1629	32.6391	31.7631	30.6949	30.4568	30.2289	30.4759	30.4276	30.9907	32.9978	34.0871	34.3993	34.4266	34.1168	33.7017	33.6665	33.893	32.7017	32.6768	31.2188	31.1367	30.6136	29.805	29.4539	29.6753	28.8419	28.9066	29.7995	29.5695	29.9611	30.9039	30.809	31.6814	32.6087	34.1753	35.2146	36.1606	37.3145	38.4393	38.8345	40.7358	41.671	43.0219	43.5917	44.2512	44.8943	45.362	46.3513
	14.3482	14.1285	13.6503	13.0614	12.246	11.7827	11.5723	11.9821	11.3097	11.6964	13.2951	13.6492	13.2563	14.1382	13.1751	13.2153	13.5061	13.1504	12.9194	13.2371	12.6048	12.0135	12.0586	12.3381	11.5304	11.9104	11.5192	11.8008	12.8307	12.3993	13.2968	13.8551	13.6914	15.1681	16.094	16.719	17.6284	18.0939	19.1881	20.1174	20.2393	21.3958	22.4796	22.9688	23.7399	24.1599	25.2764	26.1902	26.9868
	25.0552	24.063	23.3823	22.7935	22.288	22.2664	21.8655	21.9042	21.7114	21.7086	21.6885	22.313	22.699	22.9645	22.5864	22.2358	22.3148	22.4685	22.1279	23.0663	22.0613	21.9816	22.341	22.2396	22.0296	21.8004	21.7677	21.9422	22.8979	22.3973	23.1569	23.4868	23.892	24.3773	24.9296	25.7871	26.4441	26.6507	27.0954	27.8273	27.4968	28.2819	29.0216	28.9987	29.673	29.5458	29.865	29.9715	30.5673
	28.7588	28.3904	28.38	28.0707	27.5846	28.0319	27.6498	27.468	27.6367	27.0489	27.6692	27.4532	27.5201	28.6271	28.3927	28.2052	28.0773	28.2882	27.8064	28.0854	28.0485	29.1214	29.0663	30.0451	30.6026	31.1349	31.3218	31.3617	33.111	33.0819	34.5882	36.0764	37.3508	39.3976	41.6727	43.4305	45.1912	46.5347	48.1566	49.2794	50.472	53.0549	53.9648	55.4571	56.9514	58.3744	60.2849	62.8516	64.5118
	31.0177	30.1464	29.8451	29.0783	29.1049	28.3616	28.4372	28.0776	28.3709	28.5718	29.4237	30.0667	29.9258	30.567	29.7743	30.1333	30.1156	29.9808	29.0852	29.5446	28.7005	28.4422	28.9237	29.7139	29.1081	29.6788	30.609	30.7089	32.6474	33.2261	35.0955	36.8408	38.2026	40.1531	42.4001	44.5671	47.4015	48.9018	50.953	52.9593	54.2403	55.8472	57.3987	58.6119	59.6973	60.9775	62.7717	63.7176	64.8887
	33.1521	31.8629	30.9299	30.9109	30.5292	30.4143	30.8171	30.5064	30.409	30.9593	32.5129	33.1068	32.8324	33.5227	33.5114	33.5084	33.1504	33.7229	33.7252	34.4874	33.6682	33.6878	34.1336	33.2971	33.3125	33.4514	33.5591	34.4617	35.2525	35.2859	36.5047	37.6284	39.3427	41.0361	42.521	44.1938	46.3765	47.4304	49.0927	50.8991	51.9542	54.4911	55.67	57.5807	58.3986	59.7602	60.7116	61.8543	63.1751
	32.0427	29.6788	28.0453	27.2308	26.461	25.7872	25.8571	26.0556	26.8051	27.0466	29.3406	29.5787	30.2635	30.4577	30.0383	29.4493	29.5405	29.1283	28.3975	28.2494	27.0809	26.2173	25.4399	25.1043	24.4521	24.05	23.4903	23.4016	24.2723	24.0647	24.4431	25.7034	26.9653	27.7517	27.9795	28.7959	29.9073	30.3656	30.7572	30.8506	31.7412	32.3371	33.0132	33.4152	34.112	34.0639	34.3004	34.8419	35.3765
	46.3128	44.7683	43.4591	42.8291	41.9614	41.7165	40.9714	41.6325	41.125	41.3673	41.4215	42.1515	41.515	42.2156	41.4592	40.9114	40.8372	40.373	39.7968	39.5492	38.9696	38.4247	38.1739	38.561	37.9558	37.9602	37.33	37.3142	37.9956	38.1398	38.5615	39.0119	38.6392	39.6851	39.6076	40.5708	41.169	41.0506	41.4817	41.7462	42.0139	42.3683	42.605	42.9777	43.1603	42.9447	43.3038	43.263	43.7129
	22.9589	22.6984	21.8927	21.3474	21.1537	21.4958	21.3547	20.9609	20.9319	21.0842	21.3037	21.7595	21.3959	21.2521	21.5108	21.7138	21.0073	21.2535	20.9195	21.2839	21.3327	22.1107	22.9314	24.425	24.8284	26.1867	26.3913	26.9991	28.5907	29.152	30.8368	31.7162	33.2772	35.1306	37.3371	39.1159	41.0663	42.9283	43.8022	45.248	45.7474	46.9152	47.3998	48.0492	48.708	49.0741	49.9088	50.2426	51.9078
	31.7073	29.4777	28.4182	27.0912	26.243	25.1958	24.7109	24.2912	23.165	22.7494	21.8342	21.3608	21.2627	20.9368	20.986	20.6298	21.2681	20.3803	19.6108	19.2811	18.6616	18.424	19.171	20.5767	21.3948	21.8625	22.0077	22.7304	22.9853	24.1482	24.9711	26.4092	27.2149	28.7015	29.7661	32.3184	34.8662	35.8599	36.6381	37.779	38.649	39.5534	40.8776	41.4034	42.1354	42.6486	43.3099	43.943	44.6631
	25.9534	24.9322	23.7876	23.9091	23.8525	23.5628	23.0714	22.9579	23.3127	23.6479	25.1884	25.7628	25.834	25.8423	25.2443	25.2564	24.7902	24.4237	24.0377	24.458	24.419	25.1681	24.4873	24.5538	24.5449	24.4616	24.2475	24.1703	25.3984	25.9157	26.7845	26.7517	28.1357	28.9174	29.3226	30.6103	32.0108	32.2627	33.5732	33.6911	34.773	35.5282	36.1368	37.4283	38.7329	38.7808	39.4633	39.8336	40.3221
	20.5424	19.7718	19.3351	18.6331	18.3342	18.5477	18.2803	18.8163	18.416	18.6513	20.3134	20.9964	21.5229	22.2059	22.065	22.1699	22.8086	23.0045	22.0065	22.4533	21.8417	22.119	21.6992	22.3009	22.3737	22.1941	22.8663	23.171	24.5777	24.9045	26.5018	26.8835	27.8812	29.5764	29.8128	31.5672	32.9687	32.9717	34.6428	35.667	36.4619	37.4518	38.0421	38.2138	39.9924	39.9097	41.3199	41.3842	42.605
	34.9192	34.2705	33.2853	32.5792	32.7455	32.7326	32.5185	31.9205	32.198	32.3664	32.9103	32.8313	32.9672	33.0512	32.3441	32.1688	31.7233	31.6722	31.5324	31.1357	30.9735	30.319	30.3756	29.9913	30.0803	30.0987	30.2057	30.5949	30.7505	31.8912	33.0094	33.6462	34.7196	36.146	37.4344	39.3243	40.9093	42.1426	43.5528	45.7992	46.5151	48.3105	49.5169	50.5545	52.4645	53.6128	55.078	56.3035	58.1274
	34.0746	33.2875	32.7884	32.0491	31.9084	31.3577	30.645	30.2119	29.7358	29.2036	28.9551	29.1663	29.5722	29.1605	29.2988	29.5103	29.3957	28.7332	28.7066	28.8244	27.8549	28.0428	27.8735	28.2188	28.2332	28.4982	28.8629	29.2349	30.9387	30.6285	32.0324	32.9933	33.7977	35.5644	37.1268	38.0089	39.7848	40.9874	42.214	43.5758	44.4596	45.4911	46.9075	47.6826	48.5	49.4951	50.8076	51.9986	53.1115
	56.1852	57.1408	56.5166	56.2561	55.6058	51.6474	47.9138	45.0826	43.2877	40.4645	32.8449	31.6115	30.0227	29.8197	29.1792	28.5722	27.3114	26.466	25.8651	25.7942	25.6585	25.3683	25.0874	25.5616	26.1931	26.4426	27.1234	27.2263	29.0358	28.6608	29.1255	31.0432	32.6995	34.8911	36.4828	38.2725	40.014	42.3724	43.5555	46.1419	46.1052	48.5472	49.0926	50.1822	51.0111	51.4815	52.768	54.7162	55.9531
	26.7113	25.5119	24.8075	24.0134	23.7428	23.1887	22.7127	22.691	22.5959	22.5203	22.7463	23.2854	22.5283	23.3135	22.5753	22.6504	22.2412	22.0269	21.5936	22.1596	21.407	20.9503	20.707	20.8886	21.0072	21.527	21.8093	22.4164	23.2634	23.4417	24.4956	25.6482	26.3264	28.0245	29.111	30.154	31.449	32.1443	33.4789	34.7516	36.4217	36.9319	37.8996	38.5572	39.9035	40.2266	40.9866	42.2201	42.883
	34.9031	33.8485	32.4393	31.5759	30.9494	30.6678	30.1677	29.8021	29.5497	29.2196	29.7965	30.201	29.6888	29.7058	29.415	28.8615	28.6473	29.1501	28.7644	29.1432	29.2082	28.9591	28.5901	29.3291	29.5431	30.6014	30.8796	31.8386	34.1214	35.1787	36.7163	38.83	40.3598	42.9468	45.0833	47.634	49.4593	51.3653	53.5574	54.9223	56.2086	58.1163	60.0061	61.4965	62.806	64.0803	65.1268	66.8007	68.229
	54.0033	52.4664	52.3637	51.8635	53.2294	54.392	55.0492	55.8976	55.7082	56.5002	55.1071	54.8963	54.3096	53.8201	52.53	51.9794	51.1266	51.3751	50.542	50.0977	48.8996	47.9899	47.5481	47.8013	47.0187	47.2224	46.8425	46.7624	47.7735	47.9213	49.1482	49.606	50.4749	51.088	51.4993	52.5551	53.7285	53.8551	54.3567	55.2718	55.8828	56.6371	56.8314	57.6186	57.4628	58.0026	58.6198	59.5489	60.2235
	27.2467	25.4577	24.9819	24.0232	23.3741	23.2942	22.7494	23.1528	22.6182	23.2173	22.6983	24.0206	24.8175	25.3237	25.5461	25.9199	26.1825	25.9802	25.6721	25.2619	24.3567	24.0577	24.4981	24.3173	23.6816	24.1588	24.4685	24.2968	25.2792	25.3242	25.7264	26.6208	27.2481	28.2992	28.5575	29.2321	29.784	30.1592	31.3567	32.4054	31.4865	32.2709	32.9721	33.2971	33.7145	34.0753	33.953	34.5751	34.7112
	48.0481	47.6505	46.6286	45.8534	45.2381	45.1332	44.4055	44.4032	43.8461	44.5659	44.4421	44.6611	44.5465	44.6853	43.8066	43.9786	43.4855	42.7798	41.9672	41.8812	41.0267	40.6481	40.4596	40.9804	41.1247	41.4724	41.9846	42.8346	44.7906	45.1634	46.6315	48.0114	49.2214	50.6467	52.6464	53.9324	55.4642	56.7727	58.033	60.2331	61.2041	62.8618	64.5569	65.9877	67.36	68.6317	69.8522	71.056	72.6102
	24.4106	23.8611	23.258	22.455	22.2113	21.8126	21.3947	21.5703	20.7344	21.1379	20.4287	20.6426	20.5205	20.4043	20.2064	20.4423	20.4265	20.1142	20.2081	20.214	19.7167	19.3247	19.5182	20.0046	20.6756	20.413	20.6072	20.6407	21.7983	21.8648	22.4458	23.2869	23.9452	24.712	25.251	25.8954	25.9752	26.9386	28.0596	28.1347	28.8317	29.6152	30.2206	30.8654	30.5028	30.9347	31.3791	31.3938	32.8644
	41.3566	40.4434	39.1171	37.6136	37.5758	37.4896	37.2603	37.7771	37.9367	38.2976	40.0446	40.4975	40.3784	40.4903	40.1828	39.6261	39.1115	39.1281	38.4174	37.7536	37.2389	36.5065	36.2558	36.3351	36.0041	36.5812	36.8459	37.3066	38.1735	38.965	39.4613	41.7346	42.4405	43.7826	44.6885	46.1393	47.8503	48.4738	49.886	51.2546	51.6521	53.0862	53.8064	54.586	55.9548	56.2157	57.0321	58.2328	59.4362
	25.5979	25.9001	26.0815	25.5573	25.7268	26.5881	26.2426	26.5017	26.3181	26.4932	25.0672	25.0672	24.4628	24.4363	24.532	24.912	25.0064	24.8523	23.7749	24.3275	23.3944	23.5606	24.4724	25.3671	25.4195	26.1409	26.4608	27.4472	28.9026	29.5996	31.2829	32.0498	33.5357	35.1211	36.3587	37.3822	38.7338	39.2378	41.2071	42.103	42.6149	44.0376	45.9397	46.3979	47.834	48.2316	49.0842	50.3425	50.8483
	32.1925	31.0347	29.9934	30.1439	29.5839	29.5188	29.3416	29.6391	29.5554	29.911	31.4531	31.2938	31.343	31.5824	31.0687	30.9414	31.0743	30.9215	30.6923	30.7825	30.1624	31.2272	30.8932	32.3995	32.7444	33.3519	35.4781	36.9464	39.3483	40.3008	41.901	44.2065	45.3737	47.3	48.5358	49.9341	51.6709	52.3874	53.6235	54.9323	55.5595	56.9027	57.8839	59.2272	60.5647	60.9099	62.7238	64.9701	66.8419
	38.2464	38.4707	39.2001	39.241	38.9862	39.6522	39.3482	39.8227	39.8234	39.6989	39.988	39.7929	39.3453	38.8479	39.16	38.8425	38.6135	51.414	50.0758	48.9404	46.5427	45.2795	44.5967	44.9448	44.6392	45.2612	45.1973	47.6542	48.9515	49.3661	50.0432	52.7675	54.202	55.8508	57.4597	58.1898	60.7029	61.5087	62.9144	63.7079	64.6389	66.0919	67.0833	67.7877	67.8878	69.0314	69.7678	70.6834	72.0558
	200.662	200.789	201.878	201.12	202.114	204.571	203.377	202.045	201.89	203.627	177.564	182.087	181.045	181.027	179.084	180.863	182.737	183.026	185.112	186.57	188	185.562	187.343	188.572	186.135	188.934	188.319	190.793	197.258	196.968	202.645	204.329	203.942	208.408	208.802	209.23	214.029	216.992	221.144	222.804	223.099	226.316	225.874	228.043	231.88	231.088	232.619	233.368	235.873
	42.9194	40.7908	39.5147	39.1667	37.7415	37.7043	37.4875	39.3514	38.3952	38.1818	41.1852	40.867	41.0989	41.3054	40.2051	41.213	41.6836	41.2269	40.0043	40.0256	40.2667	39.9805	40.2143	40.6768	40.8072	41.1001	41.8702	42.077	44.1772	44.7419	46.3058	47.7041	47.8822	49.3063	50.5973	52.176	54.2735	54.3345	56.003	57.2611	57.6759	59.3138	61.301	62.0184	63.3824	63.5157	63.5003	64.9119	64.5972
	30.9114	30.4715	29.8938	29.1832	28.7024	29.018	28.3482	28.8162	27.761	27.9612	28.0661	27.7757	28.018	28.055	27.5737	27.9871	28.2827	27.7702	27.1124	27.534	26.8855	26.6239	26.7229	26.9709	26.8795	28.5295	28.4604	28.6662	30.1625	29.999	30.9413	31.9025	32.9705	34.1926	35.4085	37.0881	38.1975	39.2299	40.1918	41.1149	42.4458	42.94	44.5602	45.5867	46.7633	46.5886	47.6735	48.4072	49.8288
	27.9222	26.9312	25.3391	25.0534	24.9642	24.4335	24.1209	24.5049	25.5752	25.6922	27.384	28.5575	28.0743	28.0969	27.9043	27.6108	27.1393	26.7495	26.1537	26.1709	25.3898	25.278	24.6163	25.8056	24.614	25.1135	25.327	25.7739	26.9648	27.2068	28.2763	29.6188	30.5691	32.1817	33.6798	35.2408	37.4403	38.4585	39.3656	41.195	42.1239	44.5342	46.6978	48.2203	49.5988	50.7292	52.0548	53.7494	55.3464
	14.0977	13.0506	13.1587	12.0861	11.6202	11.2763	11.9229	12.0417	11.6647	11.525	13.4519	14.5203	14.3438	14.713	14.5141	14.5557	14.7415	14.4235	14.1241	13.9733	14.1697	13.8324	13.6111	14.1167	13.5812	14.069	14.0651	13.718	14.3059	14.7912	15.5849	15.9334	15.8282	16.9588	18.468	19.7028	20.7288	21.1774	22.4785	23.4491	24.9427	26.0163	26.8442	28.3961	29.6524	30.8499	31.3211	32.7265	34.3332
	27.8408	27.3247	27.2375	26.7391	26.5102	26.5824	26.415	26.2179	26.6724	26.8433	26.8406	27.1425	26.4115	27.2479	26.2553	26.264	26.6431	26.8965	26.5578	26.7161	26.5253	27.2248	26.9753	28.4986	28.6987	30.1527	31.0242	32.5873	34.8213	35.7559	38.4559	40.371	42.7361	44.5822	46.213	48.5196	50.3993	52.0971	54.2427	56.3363	57.5126	59.4774	61.3476	63.6055	65.0763	66.1737	68.0719	69.7748	71.8711
	28.7895	28.0466	27.1229	26.6864	26.5906	26.0651	25.3959	26.261	26.341	26.7476	27.0874	27.876	27.4202	28.0477	27.5421	27.6284	27.8457	28.1774	27.4183	27.9949	27.156	27.0982	26.9391	26.705	26.783	27.7476	27.2983	27.5975	28.9877	29.825	31.346	32.5496	33.4908	35.3238	35.6666	37.0137	38.9039	39.316	40.5821	41.8014	42.6406	44.0386	45.4863	46.5597	46.9951	47.7491	49.4117	50.972	52.8154
	38.1944	37.2392	36.5484	37.0621	37.5961	37.4618	37.4235	37.7172	37.7261	38.0178	38.9319	38.5614	38.3399	38.6671	38.6616	37.7907	37.1955	37.8148	37.9682	38.8904	39.2061	39.2814	39.4023	40.6761	41.2026	42.1864	43.0057	44.5351	46.0829	48.0925	51.0879	52.2772	53.3525	54.7267	55.938	56.889	58.8956	59.4767	61.1149	61.8563	63.7391	65.3322	66.0728	67.2211	67.9056	69.2193	69.4674	71.4419	71.7487
	20.2001	19.1559	18.9766	19.3395	18.9785	18.9942	18.6344	18.8815	18.4181	18.3814	19.8368	19.6043	19.5907	19.5059	19.4543	19.7156	19.7619	19.2199	19.4111	19.6367	19.1654	19.0457	19.1668	19.4612	19.824	19.6851	19.641	19.9715	20.7243	20.9349	21.6344	22.6907	23.263	24.6482	25.1151	26.7615	27.7456	28.3572	29.1169	30.6745	31.724	33.0298	33.936	35.1351	35.9812	36.8077	38.0033	38.0617	39.0629
	24.7341	23.8366	23.4594	23.4195	23.3318	23.1824	23.1339	23.4823	23.3997	24.2791	25.1446	25.6067	25.6346	25.3113	25.8382	25.7196	25.6581	25.5993	25.3389	24.8801	24.9031	25.0324	24.9702	25.681	27.5574	28.7647	29.2656	29.5777	29.1967	28.8008	29.4579	28.8952	29.7198	30.5479	30.7803	31.0575	31.6119	32.5409	33.4931	34.7352	35.2346	36.4348	36.9248	38.5977	39.7371	41.6098	42.5818	43.9329	45.7098
	27.5753	26.0839	25.776	25.4509	24.726	25.1014	25.0643	25.0823	24.5928	25.2412	26.5384	26.8289	26.9033	26.6124	26.1488	26.2223	25.6101	25.7679	25.198	25.0618	24.5967	24.3719	24.717	24.6137	24.9778	25.0832	24.9505	25.5099	27.283	28.0026	29.4599	30.1663	31.245	33.0562	34.0587	35.3424	36.4811	36.9371	38.212	38.4622	39.4922	40.5997	41.1903	42.0317	42.5495	43.0959	43.3378	44.7549	45.7584
	23.1945	22.8961	22.4086	22.2488	22.2683	21.9834	21.203	21.3465	21.0629	21.1636	21.0799	21.3267	21.0924	20.9373	20.5437	21.2376	21.2552	20.8404	20.8759	20.9532	20.2354	20.198	20.228	21.2161	21.075	21.3911	22.281	22.2647	23.5476	23.7996	24.9487	26.6916	28.2319	29.6133	30.7589	32.8763	34.9311	35.1307	36.4627	38.0192	38.2947	39.2202	40.288	40.6471	42.0116	42.6106	43.4835	44.1505	44.653
	27.433	26.7974	26.4495	26.3745	26.3644	26.3921	26.0935	25.9198	26.0192	26.38	26.926	27.3539	26.2028	26.1495	25.5287	26.0793	25.3776	25.5168	24.7215	24.8084	23.8926	24.3526	24.622	25.3183	25.5877	26.6531	26.9648	28.14	29.4327	30.1154	30.9578	32.6033	33.9103	35.411	36.3811	38.3609	39.4741	40.5229	42.4466	43.1302	43.885	44.8366	46.4181	47.7505	48.6714	49.0243	49.9307	51.6641	51.9564
	28.7474	27.2994	25.4829	25.1734	24.7032	24.2754	23.4479	23.6125	23.1453	23.8175	25.0427	25.4691	25.3137	25.9193	26.0999	25.4668	25.5544	25.3693	24.7591	24.3805	23.7194	24.1148	23.7769	23.8467	23.7668	23.9662	24.4134	24.8582	25.6236	26.3106	27.666	28.7004	29.7751	31.4164	32.2646	34.113	35.3277	36.5866	36.7718	39.5231	39.7603	40.7218	42.6039	44.0381	45.2822	46.0523	46.9832	48.3505	49.3274
	24.3884	22.7344	21.3598	20.5946	20.7047	19.8064	19.8618	19.6654	19.6362	20.5037	22.6368	22.8003	23.5279	23.4433	23.3355	23.1632	22.9975	23.831	23.3959	23.5138	22.5741	21.4586	21.5294	21.1733	20.6598	21.1369	20.7212	20.8597	21.7687	21.2063	22.3419	22.8864	23.7987	25.2838	26.1402	27.3698	28.3862	29.3424	30.7114	32.0995	32.52	34.2252	35.4683	36.8261	37.3467	37.716	39.71	40.5265	41.5636
	28.1711	27.2281	26.4065	26.099	25.9197	25.3015	24.803	24.9253	24.7841	24.5853	24.5686	24.5529	24.3867	24.4976	23.6908	24.5301	23.793	23.8982	23.1708	23.6791	22.5744	22.765	22.5619	23.3491	23.8444	24.6262	25.9976	25.8871	28.3392	29.3948	31.0971	32.2352	34.0574	35.6797	36.5541	37.8482	39.6989	40.6827	41.2829	42.7822	43.0756	43.7091	44.3502	45.0345	45.8363	46.1401	46.4514	47.3327	47.5423
	27.7518	27.4276	25.9046	26.0366	25.0717	24.8774	24.7717	24.0998	24.4012	24.0376	24.2377	24.7356	25.4387	25.3621	24.8223	25.1011	25.0374	24.4602	23.8363	24.0508	23.6309	23.1831	22.8323	23.545	23.0175	23.5467	23.3873	23.3092	24.5476	23.7847	26.2243	27.1106	27.3133	28.8431	28.9014	30.3772	30.5489	31.9792	33.6146	34.373	35.4145	36.2474	36.9231	36.7557	37.8419	38.4323	39.1327	39.8022	40.7505
[truncated: 132 more columns]

## Sheet: Panel L
IP3R1 shRNA Neurons	16.9296	16.5517	16.9962	18.3738	18.7118	17.9641	18.5757	18.3003	17.6311	18.2064	17.6676	20.2836	22.7601	22.5265	24.134	25.2844	26.127	28.1175	27.7906	28.6498	30.9301	31.2856	32.8492	33.2474	34.0843	34.6468	35.4566	36.0642	38.0656	38.9736	38.4269	39.5712	39.9927	40.4127	41.5413	41.9488	43.2895	43.1678	43.7675	44.4387	44.5595	44.7681	45.3391	45.6621	45.5401	46.1157	46.2388	46.232	46.1081
	27.7322	28.1827	28.0614	29.229	28.8667	29.0103	29.0961	28.3996	27.3091	26.8299	28.2156	29.0499	29.715	30.0365	30.8907	30.8673	31.6627	32.8782	32.7168	32.5629	33.4813	34.1358	34.3758	35.2082	35.4568	36.4673	37.3637	37.1167	38.5464	38.7671	38.8137	39.0863	38.8467	39.9148	39.9841	39.8729	40.7691	40.8446	41.0048	41.4379	41.1542	41.6273	41.051	41.4734	41.9735	41.8875	41.5584	41.5209	41.745
	16.5506	16.7996	17.4191	18.4939	18.1518	18.6082	19.472	18.9032	18.6554	18.4165	18.7735	22.718	24.7467	25.7526	27.2525	28.968	30.3566	32.7819	33.0937	35.2251	36.6238	37.7409	40.022	40.7808	42.0746	43.3257	44.7841	45.0892	46.8404	47.9508	47.8062	49.4215	50.2831	51.626	52.5695	52.6373	53.5375	54.0044	54.3157	55.1464	55.4923	55.8474	55.2713	56.58	56.6764	57.4819	57.2099	57.2227	57.1661
	22.0988	21.8308	21.8094	23.2003	22.9686	22.7012	23.0784	22.6309	20.9535	21.1759	21.1324	23.4607	25.2031	25.6255	27.0735	27.82	28.6524	30.4369	30.8577	31.7723	33.1259	34.0412	34.5765	36.0382	36.2813	37.2128	37.911	38.1952	39.0778	39.9622	39.5377	40.391	40.6044	41.8035	41.8965	42.1071	42.7327	42.8339	43.0871	43.1713	43.8223	43.0621	43.6223	44.0268	44.4129	44.1638	43.9557	43.8666	43.8201
	35.6031	35.5714	35.9273	37.2954	37.7013	37.6809	38.2993	37.5425	37.4859	37.6358	37.0116	40.964	44.1622	44.641	46.3883	48.382	49.2713	52.0832	52.3999	53.5683	55.5414	57.0743	58.4835	59.4233	60.8662	62.2054	63.3373	63.9778	65.7829	66.5373	66.702	68.3141	68.0276	70.247	70.7544	71.2233	71.8562	72.6939	73.1081	73.4934	73.7862	73.6269	74.0534	74.1938	75.0077	74.5877	75.122	74.7463	74.4791
	37.038	37.7165	40.3493	42.78	43.833	45.3184	44.7779	43.3633	42.3476	41.303	36.4001	39.9781	41.7973	43.0606	44.0709	45.4851	45.0944	47.1537	47.3108	48.2586	49.8436	50.4652	51.1326	51.7662	52.1356	53.011	53.8977	53.9833	55.5826	55.8558	55.107	55.8734	55.1994	56.6195	56.5377	55.8431	56.2222	56.4293	57.0711	58.1974	57.936	57.8172	56.9847	57.8389	57.8071	58.0103	58.183	58.2318	58.6052
	27.6017	28.1281	28.4905	29.6496	29.3096	29.4991	30.0946	29.4292	30.1283	31.9253	32.2323	35.1407	37.7908	38.7345	40.8485	42.163	43.5609	45.9095	46.6836	47.5077	49.7262	50.8297	52.2731	53.8817	55.2392	55.438	56.5855	56.8017	58.5881	59.3355	59.987	61.4689	61.2197	62.6387	63.253	63.125	64.2619	64.3579	64.6747	64.9344	64.8287	64.7376	64.9091	64.9798	64.999	64.5658	64.6599	64.2102	63.4897
	26.2466	26.2823	26.6498	27.6908	27.6479	27.2071	27.4121	27.0779	26.0467	25.6426	26.385	28.6561	30.7315	31.9088	32.6832	34.9938	36.4507	38.8759	39.8207	41.776	43.9233	44.9538	45.5985	47.1159	48.4036	49.0623	50.0649	50.3886	51.65	52.3156	52.4527	52.9663	53.2873	54.6136	55.5326	55.1765	55.423	54.8248	55.1914	55.4034	55.6411	55.3462	55.0946	55.2924	55.7866	55.8411	56.0831	56.0343	56.0937
	19.0014	18.6125	18.3115	18.9156	19.0487	18.5413	18.6712	18.3857	17.132	17.6159	17.7035	20.2741	22.776	23.409	25.0759	26.0068	27.4579	29.6906	30.7378	32.4089	33.8743	35.3935	37.6343	38.8492	40.3504	41.387	43.5884	43.5667	45.3934	45.6576	45.5516	46.678	46.7395	47.4784	47.8715	48.3191	48.7261	48.5528	49.3664	49.1186	49.5122	49.7439	49.5903	50.2976	50.0657	50.6601	51.116	50.8424	51.0355
	9.26705	9.41125	9.29099	9.64268	9.73549	9.12813	8.98245	8.51094	7.74929	7.67308	8.62207	10.4481	12.8039	13.5736	15.1092	16.5605	17.3063	19.4828	19.7854	19.9087	22.3182	23.103	24.5946	25.1934	26.5359	26.8917	27.904	27.8522	29.5064	29.3372	29.6025	29.8769	30.263	30.8787	30.928	30.5875	30.8657	30.5097	30.3454	30.1596	30.0772	29.917	29.6714	29.7391	29.5055	29.1984	28.5195	27.9857	27.8229
	7.09962	6.92968	6.67997	6.79864	7.06499	6.93386	6.8258	6.32445	5.13251	5.1639	6.54004	8.02177	9.67317	10.9744	12.6218	13.7544	14.9544	16.8958	18.0151	19.3314	20.5806	21.3733	22.9475	23.5356	24.6802	25.6709	26.1674	26.4985	27.7404	28.1911	27.8802	28.4055	29.0233	29.1814	30.0934	29.5656	29.8092	29.4526	29.2373	29.6613	29.1311	29.2057	28.8447	28.864	28.7868	28.31	28.4719	27.6126	27.7529
	8.82728	8.81428	8.94283	9.32216	9.0053	9.02071	8.9104	8.5324	7.83345	7.50455	8.2272	10.2488	12.4408	13.6413	14.6788	16.1762	17.0347	19.1031	19.653	21.5605	22.1705	23.297	23.6532	25.0649	25.8442	26.3347	27.4308	27.3921	28.2992	29.0318	28.9546	29.1761	29.3447	30.1449	29.9268	29.9231	30.0344	30.0177	30.1041	29.7851	30.003	29.5067	29.4043	29.1543	28.7589	28.494	28.5699	27.7168	27.5529
	12.0857	12.1241	11.7899	12.6914	12.4777	12.3766	12.4069	11.941	11.1095	11.0039	11.0189	13.8418	15.8571	17.0155	18.0261	19.4836	20.5607	22.2256	22.8202	23.6081	25.2207	26.3354	27.621	28.7108	29.3727	30.2099	30.8598	31.3465	32.8366	32.9522	33.4823	33.9231	34.2386	35.1164	35.3615	35.3923	35.752	35.8567	35.6519	36.0276	36.2859	36.6734	36.2002	35.995	36.7868	36.506	36.437	35.9637	36.331
	24.9851	25.1778	25.9368	26.2905	26.7854	26.8085	27.2973	27.2467	27.1176	26.9882	25.658	29.0781	31.6178	33.2044	34.863	36.8666	38.74	41.2717	42.0208	44.0256	45.5511	47.4609	49.4906	50.4268	52.0078	53.1582	54.8888	55.6695	57.7241	58.6932	58.7243	59.8404	60.0055	61.353	61.7383	61.9301	62.7163	63.1616	64.1358	64.3304	64.3488	64.0641	63.8957	63.7337	64.135	63.9613	64.6908	63.6892	63.5998
	26.6417	26.6404	26.6678	27.5745	28.0939	28.4006	28.9864	28.2996	26.5139	27.2661	27.1779	29.3317	31.3676	32.9216	34.7065	36.8022	38.2878	40.9171	41.2961	43.7991	44.4189	45.3498	47.0216	47.6547	48.7833	48.9239	49.9308	50.3149	51.0942	51.6306	51.3052	52.0945	52.2045	52.7248	53.4042	52.9702	52.4544	51.9953	52.0345	51.5608	50.949	51.0381	50.7705	50.8969	50.417	49.4526	50.1195	49.4179	49.4732
	24.9999	25.3205	24.8404	24.8026	25.6185	25.3049	25.4626	25.0004	23.0122	22.85	23.694	25.2501	26.0937	26.6425	27.2851	27.7824	28.3225	29.6267	29.2861	29.5429	30.5719	31.3181	31.5703	32.848	33.2071	33.6317	34.018	33.5102	34.8917	35.3319	34.4225	35.7652	36.3918	36.8533	37.2874	36.8148	37.0579	37.0119	36.9028	37.0035	36.919	36.8219	37.3817	37.0438	37.0295	36.7828	36.8502	37.4543	37.946
	29.342	28.5977	28.3201	28.2904	28.096	28.1663	27.8044	27.7108	27.4171	26.8751	26.5689	26.8517	26.7551	26.3054	26.0881	26.8156	26.9978	27.5968	27.9579	29.4566	29.8684	30.0794	31.6385	32.6674	32.3937	33.6464	34.8474	35.6459	35.601	36.4788	37.09	38.1079	38.2397	39.3249	40.1969	41.0546	42.0464	42.8862	43.381	44.4691	44.4296	45.3	45.4041	46.3163	46.9791	47.5457	47.8417	48.2158	48.026
	37.3867	36.7755	36.4165	37.0736	37.6434	37.4213	37.6625	37.2128	36.9372	36.7054	35.8628	37.337	37.3591	36.8947	37.1905	38.2513	38.8716	39.3451	40.2608	42.2858	42.5144	43.3041	44.1246	45.1846	46.2213	47.1396	48.6047	50.018	50.3296	51.0495	51.8124	52.8078	52.894	54.3383	54.8316	55.59	56.323	56.8433	57.6188	57.7895	58.4297	59.4689	59.9557	59.3854	59.9864	61.3175	61.377	61.7406	62.1215
	33.5246	32.6971	32.5601	32.5221	32.7976	32.4631	32.3098	31.9869	31.3356	30.8448	29.7757	30.35	29.8465	29.5003	29.614	29.7363	29.8166	30.049	30.2375	30.7763	31.2172	31.3167	32.6001	32.7992	33.984	34.6715	36.3966	36.9847	37.6511	38.6019	39.6921	40.2093	40.5986	42.3136	43.3308	43.4806	45.0288	45.4084	46.1569	46.9442	47.2823	47.9654	48.8983	49.4202	50.1108	51.1585	51.5924	52.5283	52.5787
	26.8244	26.5082	26.0019	26.5187	26.5913	26.7487	26.2959	26.032	25.7167	25.3834	25.3938	26.0372	25.6511	26.2287	25.895	26.2058	26.5591	26.7205	27.4878	28.1294	28.335	28.4473	29.5537	29.8336	30.3601	30.6585	32.4452	33.2545	33.4628	34.9068	35.6288	36.0352	36.842	37.9434	38.9196	39.6552	40.7205	41.5302	42.4944	43.0916	43.3847	44.6044	44.9655	44.8466	45.4302	46.3483	46.6261	47.7913	47.7433
	49.2282	48.5242	48.9398	49.2803	49.1569	48.9364	49.1345	49.2509	49.1363	48.8401	48.8272	49.115	49.2029	49.2282	49.5287	49.8463	49.7243	50.2086	50.3753	51.3002	52.2482	52.6474	53.6846	54.3336	54.7866	55.4704	56.9617	58.0443	58.4493	59.402	60.2242	60.7186	61.0399	61.9961	62.4365	62.9718	63.8097	64.2889	64.5278	65.4811	65.7178	66.426	67.0402	67.1592	67.2771	68.6328	68.5406	69.0397	69.3863
	25.762	24.9581	25.5373	25.4248	25.4221	25.2959	25.0934	25.1641	25.1044	24.8081	24.1655	24.6204	24.4619	24.2159	24.798	24.8258	25.0257	24.9419	25.0427	25.9504	26.349	26.6366	27.4885	27.5346	28.5006	29.0413	30.9857	31.7913	32.5116	33.7445	34.635	36.0156	36.9224	38.5029	39.6231	40.4764	41.5557	42.5708	43.4262	44.5812	45.1179	46.9066	47.6462	48.8225	49.7088	50.9795	51.5038	52.1688	52.961
	47.6862	47.3225	46.5893	46.8251	46.7209	46.6645	46.6852	46.0349	45.601	45.4753	43.377	43.8848	43.7831	43.2859	42.7655	43.1427	43.6265	43.6138	43.4544	45.1086	45.1253	45.2165	46.2001	46.633	46.7498	47.1336	48.631	49.0184	49.1532	49.6083	50.9213	51.266	52.0661	53.2912	53.4261	53.6977	55.2881	55.3845	55.814	56.2753	56.5028	57.307	57.968	58.2767	58.2648	59.0472	59.7087	59.7736	60.3834
	42.8648	41.764	41.5544	41.8874	41.6264	41.346	41.2476	40.4631	40.2339	39.8422	38.5567	39.1918	38.9276	38.5901	38.9069	39.1134	38.8166	39.033	38.8982	39.3902	39.9233	39.8805	40.3873	40.4499	41.1405	42.0949	43.1905	44.1381	44.442	45.5408	45.6738	46.7273	46.2814	48.6326	48.9558	49.1665	50.355	51.256	51.3676	52.5535	52.5696	53.2873	54.1361	53.7936	55.1435	55.2925	56.3238	56.0604	56.5882
	35.4035	34.7846	34.4807	35.0352	35.0422	34.6599	34.2284	33.337	33.2632	32.7	31.5818	31.9116	31.8152	31.7143	31.6071	31.8989	32.2597	32.585	33.2134	33.6946	34.1835	34.7098	36.2665	36.3294	36.5555	37.8933	38.5616	39.4583	39.1592	39.8268	40.2261	40.6532	41.1953	42.0866	42.6596	42.6686	43.433	44.0613	44.3814	44.6952	44.916	46.0028	45.9602	46.1431	46.5475	47.1959	47.0374	46.7109	47.1534
	29.0472	28.261	28.3692	28.596	28.3599	28.3485	27.9297	28.1348	27.8787	27.1983	26.0911	26.2166	26.531	26.1712	26.4137	27.2134	27.5878	28.1701	28.6068	30.1651	30.6665	31.3038	33.0223	33.7467	34.6958	36.34	38.1897	38.7251	39.8836	41.0781	42.1174	43.5519	44.1052	45.6259	47.4344	48.1325	49.3441	50.8873	52.3191	53.2415	53.7067	54.4419	55.5776	56.5542	57.3514	58.204	58.384	59.0072	59.3417
	36.2184	35.5194	35.0834	35.4984	35.4172	34.9936	34.8876	34.0269	33.4006	32.725	30.7416	31.8271	31.2189	30.9575	30.5965	31.0981	30.8302	31.5651	31.522	33.1864	33.3718	33.2721	35.0917	34.9953	35.5728	36.3992	37.9658	38.3599	38.7059	39.5105	40.2021	40.7136	41.1419	42.1683	42.6494	43.1279	43.6504	44.2201	44.9437	45.5131	45.336	46.1328	46.9492	46.2825	47.8342	48.6058	48.0492	48.8625	48.7297
	37.9576	37.8158	37.7714	37.8131	38.0895	37.8585	37.6171	36.9273	36.9029	36.675	36.6145	37.0334	37.1559	36.854	37.1909	37.0122	36.7354	37.2879	37.6931	38.4144	38.9836	39.2716	40.1999	40.4492	41.006	41.4994	43.287	43.896	44.4938	45.3784	46.3234	46.9598	47.5119	48.6239	49.6333	49.7836	51.0091	51.6438	52.6147	53.3257	53.5016	54.512	55.3645	55.3729	56.1703	57.2312	57.3586	57.8801	58.4456
	37.6469	36.6069	36.8675	36.8774	37.2287	36.7409	36.3828	35.7509	36.0295	35.4624	35.3063	36.3624	36.5268	35.8111	35.6956	36.2346	36.1173	36.2988	35.9985	37.6231	38.1111	38.7133	39.3155	40.3661	41.193	42.0366	43.9898	45.0783	46.3886	47.2721	48.6892	49.6577	51.0156	53.1034	54.3362	54.8299	56.6744	58.2757	58.9034	60.3144	61.0849	62.0388	63.0633	63.7648	64.9154	65.9065	66.1915	66.9871	67.8256
	32.3805	32.0111	31.986	31.9063	32.8375	32.715	32.9684	33.3955	33.271	33.2556	33.7386	34.3782	34.4852	34.9949	35.3584	35.3599	35.2215	35.8213	36.7993	38.4005	38.6342	38.5175	39.2456	39.5329	40.6202	41.3236	42.8146	43.7763	44.1126	45.6376	46.7425	47.3579	47.6048	50.1451	51.1362	51.6326	53.0919	54.576	54.9941	56.3041	56.3609	57.3597	58.4827	59.8329	60.2052	61.4047	62.0418	62.7154	63.4083
	43.048	43.182	42.7221	43.5158	43.89	43.4736	43.4627	43.0429	43.1291	42.7446	42.1655	43.274	43.4264	43.3383	43.3905	44.6421	45.2853	45.6457	46.8865	49.0435	49.9901	50.6214	52.1646	52.8991	54.4974	55.7008	57.6705	59.6375	62.0369	64.6712	66.2776	68.7955	70.6661	73.3949	75.764	76.7323	78.6065	79.8567	81.1099	82.4191	83.2189	84.4509	85.4782	86.0227	87.0503	88.6389	89.085	90.336	91.0493
	42.0959	41.0854	41.225	41.6883	41.7356	41.3399	41.686	41.2817	40.182	40.164	37.5945	38.0337	38.274	38.3341	38.6303	39.342	39.1476	40.3315	40.824	41.7202	42.4075	43.4224	43.6541	44.3424	45.4609	45.6901	46.9302	47.2136	47.4886	48.1486	48.7565	48.7024	50.1785	50.402	51.4936	51.4898	51.9119	52.8109	52.8548	52.922	52.9276	53.8212	53.7171	54.9992	55.9714	55.5244	56.0663	55.4087	55.1851
	46.2225	45.5198	45.6417	45.7159	45.6772	45.259	45.3089	44.7244	44.9364	44.16	43.2032	43.6571	43.7393	43.5864	44.1227	44.4838	45.6587	46.6739	47.3715	49.2535	49.4565	50.2223	52.4914	52.6752	53.6467	55.047	57.0375	57.2774	57.9896	59.3643	60.7819	60.8882	61.3942	62.7173	63.5827	63.5254	64.884	65.4983	65.7541	66.2491	66.2203	67.0601	67.549	68.4762	68.0663	69.2004	69.2975	68.7152	69.6202
	29.9931	29.5071	29.7861	29.664	29.975	29.8388	29.4803	29.4802	29.4217	28.5725	28.2676	28.3971	28.4795	28.5017	28.5614	28.8878	28.989	29.1423	29.5112	30.0389	30.9463	30.3859	31.249	31.5586	32.4509	32.9404	34.0786	35.1192	35.1669	35.9054	36.4795	37.7505	38.0933	39.3713	39.4385	40.1241	41.1645	41.7808	42.1269	42.5444	42.9687	43.73	43.9808	44.7801	44.9478	45.9111	46.088	46.4925	46.9812
	43.319	43.0617	42.5963	43.46	43.4693	42.7466	42.8009	41.975	41.8428	41.3744	39.7798	40.1267	40.6164	39.8925	39.8149	40.2871	41.0049	41.023	41.8009	42.8251	42.9967	44.0954	45.445	45.2898	45.6497	46.965	48.0582	49.2489	49.4083	49.5971	50.8444	51.7078	51.7244	53.0146	53.4744	54.0752	54.8795	55.2605	56.3422	56.5164	56.6129	57.5487	57.938	58.788	58.3317	59.4124	59.5466	59.9888	60.0008
	37.5611	36.7897	36.1276	35.8604	36.1514	35.8027	35.3098	34.4979	34.7673	33.8663	32.097	33.005	31.9546	31.4076	31.6773	31.9793	32.0532	31.6591	32.0964	32.7453	33.5552	33.0055	34.5145	34.2541	35.1215	35.1826	36.2448	36.6658	36.1924	37.176	37.7887	37.9416	37.9119	38.962	38.7425	39.0877	40.3022	39.5177	40.7276	40.9221	41.1382	41.4392	41.7905	41.8737	41.8427	41.9631	42.1625	42.7307	42.2851
	28.3934	28.0134	28.0011	27.6274	27.2753	27.4787	27.8067	26.9469	26.9294	25.8812	25.3316	25.6468	25.4639	25.8961	25.3698	25.595	25.7226	26.1678	26.2635	27.3398	27.4996	27.6559	28.6938	29.1408	30.6403	30.9194	32.7487	33.5263	33.8005	34.7307	35.8543	36.647	36.9773	38.9879	38.2994	39.2882	40.2709	41.1451	41.896	42.6542	43.2726	43.4729	44.0286	44.8628	45.4802	46.373	46.6157	46.9127	47.2928
	44.9317	44.016	42.9436	43.2069	42.3048	42.4925	42.411	41.77	41.7192	40.9687	40.4197	40.6932	40.5598	40.2647	40.091	40.3792	40.1093	40.1875	39.999	40.8098	41.2647	41.0531	42.0189	42.2373	42.6922	43.0781	43.7775	44.0791	44.1756	44.5941	44.9568	45.0493	44.8046	45.8734	45.9729	46.0746	46.7193	47.2126	47.14	47.4475	47.8425	47.6411	48.2672	48.8457	48.7144	49.5162	48.8599	49.0379	49.2092
	34.6805	34.2201	34.002	33.4897	33.9422	33.4307	33.4326	32.862	33.4023	32.532	31.0747	32.1922	30.6589	30.4777	30.4466	30.209	30.8485	30.8217	31.2225	32.2652	32.5508	32.1884	33.1237	33.8489	33.9099	35.0577	36.0101	36.2337	36.6852	37.7882	38.1498	38.593	38.7251	40.4505	40.9584	42.4863	44.3398	45.4801	46.606	46.7448	46.623	46.9683	47.2669	47.6515	47.9226	47.8354	48.2863	48.6854	48.5906
	43.106	43.2864	43.418	44.4779	45.0328	45.1953	45.6244	45.1692	45.1459	44.7226	44.8462	45.8365	46.7801	46.4661	46.6601	47.1588	47.4942	47.707	48.2654	49.3481	49.6022	49.7483	50.3074	50.7859	51.2446	51.5421	53.2595	53.238	53.7262	54.2704	54.6489	54.6926	54.9855	55.4863	55.6472	55.4073	55.4965	55.4967	55.4663	55.4551	55.2085	55.2455	55.454	54.8601	55.3157	55.0753	55.0169	54.1625	54.6759
	47.0343	46.6557	45.8419	45.9289	46.8642	46.629	46.3787	45.9779	46.1862	45.2145	45.1335	46.1274	46.6938	45.748	46.1171	46.875	47.1003	48.6761	49.1818	50.6035	51.4295	52.3813	53.6867	54.087	55.3032	56.8605	57.888	59.2489	59.5805	61.2373	61.6203	62.245	63.499	64.4035	66.0046	66.162	67.5236	68.3782	69.1396	70.2679	70.6822	71.6071	72.7961	72.6594	73.926	74.6398	75.0683	75.9794	75.9822
	32.1369	30.8968	30.5726	30.666	30.6433	30.3671	30.0908	29.6222	29.2067	28.9498	27.8395	28.0602	28.232	27.6211	27.909	28.6126	29.1338	29.4389	30.2322	31.7483	32.45	33.0338	34.3898	35.3077	36.1978	37.4943	38.529	39.3437	40.0988	40.9067	42.3057	42.5531	43.7593	44.7574	45.7175	45.5066	47.7855	48.5365	49.209	49.9594	50.9301	51.336	53.173	53.1133	54.4059	55.2273	55.2228	56.3502	56.4818
	35.8299	34.943	34.7642	35.002	34.7258	34.7952	34.5398	33.8641	33.8001	33.5501	33.1497	34.0784	34.7866	34.4388	35.5783	36.8444	37.7076	38.8413	39.0689	41.1627	42.03	42.9334	44.6478	45.1851	45.6369	46.7351	48.3381	48.6005	48.7103	49.2368	49.233	49.7557	49.0924	49.6666	50.2518	50.5931	51.5976	51.302	51.6366	51.8733	51.1197	52.0772	52.164	51.8989	51.9698	52.1096	51.9446	51.1595	50.9711
	37.3256	36.0797	35.7847	35.2848	35.6168	35.2276	35.4366	34.8669	34.631	34.4516	34.2454	34.9648	35.1263	35.5254	35.4542	37.0369	37.7791	38.6699	39.152	41.0125	41.7176	42.366	43.5124	44.3428	44.8766	45.7635	46.8548	48.0673	47.7401	48.3788	48.6334	48.6538	48.8431	49.8809	49.64	49.941	50.4605	51.333	50.9722	50.5577	50.7085	50.9194	50.6489	50.5486	50.0918	50.186	50.1776	49.5268	49.1368
	42.0562	41.5736	42.8452	43.3618	43.6311	43.2777	42.4526	41.3209	40.1728	39.4401	37.5474	37.552	38.4026	37.819	38.1772	38.7769	39.0373	40.2311	41.2027	42.3764	43.7278	44.8091	46.2451	46.7803	48.4019	49.3706	50.5862	51.439	51.6757	52.913	54.0329	54.0816	54.489	56.1243	56.366	56.6844	58.0423	58.3355	59.2879	60.3328	61.1367	61.9035	62.3332	63.2296	63.1149	63.6615	62.8792	62.7912	62.6727
	36.8267	36.8951	36.9569	37.4009	38.81	38.7054	39.0344	39.4725	39.3097	39.2088	40.7803	40.8165	42.0397	41.7858	42.2938	42.2263	42.8677	43.4933	44.4219	46.2466	46.7129	47.8149	49.3859	50.2283	51.4145	53.1388	54.8179	55.8606	57.2934	58.833	60.4404	61.1035	61.9164	64.681	65.3673	66.8612	68.2521	69.3818	70.9735	73.0584	73.4863	74.4362	75.8158	76.7528	77.2324	78.182	79.1087	79.7545	80.5621
	40.1169	39.6947	39.4499	39.9367	40.5556	41.0194	40.7201	40.5309	40.2276	40.3036	39.8395	40.8448	40.0671	39.6729	39.6901	39.8088	40.4311	41.2973	42.1453	43.4229	44.4576	44.8996	46.0948	46.6071	48.0174	48.9266	50.9552	51.7192	52.9025	54.3599	56.3474	56.9781	58.6339	60.038	61.2635	61.6039	62.6326	64.183	65.0019	66.0774	67.1433	67.8159	68.5214	68.7187	69.328	70.3668	70.602	71.0618	71.6019
	45.5558	44.681	44.5706	44.6201	45.1439	45.1274	45.2329	44.1599	44.1294	43.9598	42.4898	42.7629	42.2524	42.3188	42.8945	44.369	45.3337	46.2599	47.354	48.966	49.5108	50.773	53.1139	53.4002	54.6471	55.8232	57.0008	58.1116	58.4275	59.5349	60.4986	60.9454	61.6732	62.5527	62.4268	63.7658	64.4886	65.3821	65.5505	66.1804	65.7173	66.072	66.2292	66.7414	67.0264	67.831	67.7141	67.7474	67.3364
	27.6401	27.076	26.4096	27.0135	28.1027	28.1891	27.8577	27.9284	27.6681	27.3032	26.2169	27.3869	26.9023	26.965	26.5759	27.5689	27.8612	27.652	28.417	30.3558	31.477	31.7178	33.067	33.7551	35.1219	36.2794	37.8707	38.5739	39.8529	40.2817	41.7532	42.5145	43.6144	44.515	45.4392	46.5748	47.6497	48.9619	50.0569	51.2953	51.589	52.3467	53.6403	54.1059	54.9107	56.4968	56.2445	57.4899	58.8122
	45.2979	45.1989	44.6871	44.979	45.7358	45.3674	45.3813	44.9687	44.6653	44.2334	42.8898	44.2786	43.8111	43.2227	43.4547	44.6406	45.0313	46.1105	46.7428	48.8293	50.0309	50.3135	52.812	53.3673	55.1804	56.1187	58.1596	60.0245	60.5096	62.1357	63.1795	63.5534	64.7433	66.1696	67.1204	67.1467	68.2596	68.9482	69.3734	69.8675	70.7114	71.08	71.6817	71.3633	71.7666	72.367	72.5872	72.3896	72.6364
	25.1802	24.949	24.4818	24.3454	24.6036	24.0947	24.3741	23.9991	23.3001	23.7457	23.6956	24.2967	24.1742	23.5745	24.0899	24.3873	25.4614	25.8282	25.9622	27.5983	28.5595	28.3047	29.8237	29.9198	30.8054	31.0403	32.5804	32.8395	33.1351	34.3251	35.1523	35.2344	35.6514	36.9961	37.7032	38.4457	39.17	39.5845	40.2246	40.8876	41.2772	41.7073	42.5002	42.5198	42.8778	43.3384	44.2356	44.4527	44.3019
	43.021	42.3923	42.249	42.8329	42.9068	43.1814	43.3863	43.2164	43.356	42.6549	42.1384	43.1455	43.2734	43.2964	42.8042	43.7207	44.0976	44.2032	44.4969	46.5461	47.5117	47.5561	49.5007	49.5955	51.4153	51.934	53.9216	54.9848	55.7118	57.1615	58.1148	58.9298	59.7807	61.1445	62.2819	63.2996	63.1688	65.0374	65.7292	66.4221	67.366	67.7629	68.2158	69.3834	69.9341	70.8631	71.0076	71.7853	71.6214
	47.1513	46.3252	45.7746	45.9172	45.1148	45.5985	45.1742	44.6329	44.1134	43.8737	41.8579	41.9513	41.7691	42.9304	42.8016	43.2085	42.0476	42.4611	42.8172	42.5535	43.3021	43.2918	43.3428	43.3785	43.7386	44.2591	44.0889	44.7391	45.026	44.6393	44.6138	45.2391	45.1219	45.4673	45.7857	47.3107	46.2291	46.994	46.5305	46.7099	47.171	46.8263	47.588	47.387	47.1399	47.0503	47.154	48.0027	47.5643
	46.3755	46.3925	45.6809	45.8062	44.933	45.1335	44.8129	44.3774	44.4026	44.0169	43.1412	42.5258	42.7553	42.5253	43.3934	44.1416	42.8867	42.9811	43.6177	43.0444	43.797	43.9794	44.2137	44.2129	44.1877	44.6905	44.7656	45.341	45.3824	45.1609	45.4569	45.6618	45.4192	46.6039	46.9603	47.4162	47.0919	47.4151	47.9423	47.7053	47.8981	47.9178	47.8347	47.6013	47.6886	47.7761	48.0219	48.5212	48.6387
	42.4003	43.12	42.4503	43.045	43.0803	44.107	43.4772	42.2968	42.5909	41.7824	39.7537	40.1023	39.6803	39.9478	41.2618	42.3348	42.1481	42.668	44.0406	43.8616	45.6511	46.6129	46.95	47.2467	48.8475	49.8989	50.3333	51.4975	52.2605	52.7402	53.4793	53.3975	53.878	54.8754	55.1993	56.2618	55.8146	56.7799	56.8607	56.1115	57.0664	57.0605	58.0413	58.2053	58.4122	58.2018	58.3026	58.493	58.3551
	40.0939	40.2603	39.5751	40.5069	40.2803	40.8837	40.9474	40.9887	41.888	41.843	42.7495	42.8914	43.2771	43.7308	44.5002	44.9373	44.2655	44.5936	45.0173	45.2267	45.3824	45.5223	46.0517	46.3961	46.8831	47.1003	47.0471	47.9174	47.982	47.8859	48.1261	48.8284	48.6903	49.6441	49.4435	50.7017	50.0365	51.0871	51.12	51.0407	51.1482	51.3598	51.6352	52.0583	52.5662	52.6695	53.2759	54.0879	54.1593
	59.1743	58.8447	58.7054	60.0263	59.4828	60.5503	60.483	60.3152	60.5249	59.8544	59.4797	60.1088	60.186	61.5214	62.1714	63.055	62.3989	62.8685	63.1245	63.5692	64.3575	64.2178	64.1163	63.7841	64.4993	64.9023	65.5192	66.2341	66.6973	66.8428	67.4668	67.2785	67.4979	69.2544	69.0528	71.3285	70.5123	72.2471	73.0769	72.6576	72.8248	73.6243	73.4552	74.1938	74.3998	74.4311	74.5041	76.2079	75.1223
	33.9207	33.9712	33.3595	33.9706	33.0422	33.6383	33.513	33.3518	33.7573	33.7917	33.6166	33.5523	33.8292	34.2735	34.7511	35.0765	34.4491	34.6679	34.8465	34.7914	35.2608	35.4072	35.7734	35.8473	35.9516	36.25	36.2342	37.1366	36.7063	36.9781	36.8339	37.1875	37.303	37.7597	38.0292	39.0988	39.1957	39.1763	39.9549	39.6644	39.7781	39.6841	39.9917	40.1918	40.4782	40.4529	40.4854	41.0185	40.9751
	45.2489	44.659	44.4135	44.9418	43.8372	44.1963	44.2508	43.5959	43.51	43.475	42.3052	42.3069	42.3573	42.6953	43.1774	43.6035	42.4532	42.014	42.6265	42.4492	43.3055	42.5337	43.1593	43.2732	43.2675	43.5098	43.2167	44.1582	43.9261	43.9503	44.0863	44.2315	44.3168	45.2774	45.5033	46.5176	45.8333	46.6113	46.5593	46.6381	46.6384	46.9149	46.973	47.3791	47.6049	47.2068	47.8233	48.6182	48.2057
	45.3661	45.088	44.6294	45.3046	44.6427	45.3037	45.6694	45.3895	45.9165	45.3349	45.7478	45.7493	46.2501	46.407	46.9337	47.7349	46.3255	46.2634	47.2759	46.7557	47.173	47.3884	47.7692	48.4354	48.4698	49.0305	48.5048	49.5565	49.4531	50.1044	50.1443	50.8762	50.8992	52.1764	52.5482	53.7578	53.9457	54.4785	54.6205	54.6705	55.3643	55.8086	56.0061	56.8517	57.1586	56.8633	57.7677	59.0832	58.9544
	39.2178	39.246	38.7407	39.8368	39.1896	40.0776	40.222	39.9846	40.3887	40.638	40.9662	41.8238	41.3703	41.768	42.237	42.8252	41.9354	41.7522	42.4216	42.078	43.1203	43.5769	43.87	43.6107	44.2483	44.3103	44.1999	45.1506	45.1177	45.5292	45.408	46.2181	46.5913	48.1276	48.673	50.2871	50.047	50.9972	51.7753	52.298	52.8204	53.355	54.3311	55.0026	55.8526	56.7388	57.4874	59.1513	59.5544
	43.4645	43.4881	42.9398	43.7195	42.8063	43.1909	43.6912	43.5905	43.6499	43.2899	43.514	43.2112	43.2153	43.4867	44.4032	44.7889	43.887	43.9847	45.0228	45.0889	45.6076	45.485	45.8488	45.9541	46.6023	47.2972	47.1666	48.1506	48.5123	48.7157	48.9687	49.972	50.0426	51.4796	52.4308	54.5761	54.4243	55.4416	56.2728	56.8271	57.1193	58.1184	58.4042	59.3106	59.1997	60.035	60.9172	61.6172	62.4407
	53.6952	53.1105	52.6031	53.1526	52.4692	52.5027	52.3927	51.7855	52.4036	51.3631	49.766	49.616	49.5773	50.2031	50.4694	50.9207	49.9294	49.4798	50.125	50.0024	50.5306	50.0654	50.4614	50.4697	50.9045	51.1815	51.1043	51.5914	51.8655	51.4664	52.1981	52.1422	51.3429	52.4105	53.1096	53.7585	52.9184	53.8404	53.6119	53.7431	53.8727	53.4832	53.2609	53.7366	53.6619	53.3754	53.7893	54.6416	54.3215
	61.3214	60.8452	60.0481	60.3903	59.7787	59.7347	59.5594	59.199	59.7351	58.5566	57.4811	56.8067	56.7037	57.1027	57.5608	57.6213	57.1408	56.7794	57.1997	57.1587	57.3724	57.0671	57.6293	57.2102	57.8466	57.9548	57.7663	58.6794	57.9081	58.2363	58.0119	58.5907	57.9783	58.6505	58.8599	60.1206	59.9967	60.2906	60.7367	60.6639	60.6454	60.6647	60.6442	60.7289	61.5381	61.0614	61.6552	62.6633	61.9485
	46.2304	46.2614	46.3567	46.6424	46.3638	46.7615	46.8146	46.1682	46.111	46.4015	45.1873	45.567	45.6767	46.2946	46.916	47.6297	47.2042	47.872	48.8722	49.1308	50.9241	51.7223	52.6999	52.9248	53.5681	54.5246	55.1326	56.6191	56.7806	56.988	57.6547	59.0415	58.6317	59.691	60.6632	61.8606	61.5042	62.2163	62.9767	62.8215	62.6299	63.5056	63.4431	63.8241	64.0119	64.1182	64.976	65.7108	65.3531
	62.5837	61.9466	62.0124	62.6403	61.9158	62.6315	62.6309	62.4298	62.8952	62.9458	60.8255	60.8229	61.5231	62.9969	62.9805	63.7218	62.7517	64.1746	63.7113	64.8688	65.0168	65.1197	64.9359	65.5039	65.8827	66.6215	67.0729	67.6491	67.7264	67.199	68.1746	68.3532	67.9965	69.4109	69.4056	71.6948	70.8313	71.9731	72.8842	72.5127	73.0357	72.5777	73.4957	74.0988	74.9666	75.3453	76.1518	77.3635	76.5862
	40.3594	40.484	40.5764	40.7196	39.8032	40.8527	41.1307	41.0529	41.2694	40.8061	44.4317	43.7996	44.8065	45.9316	46.4212	46.7882	45.5116	44.6317	45.3754	45.1481	45.2434	44.4965	45.2115	45.2904	45.8079	46.4617	46.4625	47.4541	47.3341	47.9784	48.1645	49.5348	50.2605	51.2665	52.1647	53.5208	53.2515	54.9555	56.0384	55.9353	57.7794	57.9716	59.1825	60.6066	61.2503	61.2315	62.7717	64.4211	64.7461
	53.2986	52.8925	52.4146	53.1696	52.6985	52.9069	53.1563	52.5119	52.8386	52.5235	52.8063	52.9881	53.4172	54.1064	54.7612	54.7939	53.9679	53.8248	54.1819	54.1785	54.8404	53.6666	54.7798	54.8164	55.7034	56.2349	56.3482	57.2197	57.0633	56.5173	56.7051	57.535	56.9902	57.8576	58.6699	60.2745	59.8109	60.2008	60.7411	60.1873	60.884	61.3033	61.1447	61.3729	60.854	61.7682	62.3931	62.5445	62.6878
	35.4533	35.5471	34.5973	35.2204	34.7457	34.882	34.8843	34.5301	34.8654	34.6078	35.1104	34.2881	34.259	35.0166	35.2605	35.7884	34.4854	34.9685	35.1227	35.1417	35.7172	35.5516	35.6265	35.821	36.503	36.455	36.3487	37.0367	37.0035	37.3337	37.7882	37.9914	37.9233	38.1548	38.4985	39.0063	38.6211	39.5191	39.5538	39.5429	39.9269	40.0299	40.3698	40.1735	40.4608	40.7057	40.6555	41.4948	41.3397
	55.156	54.6436	53.6286	54.0785	53.5838	53.7874	53.6394	52.4955	52.8294	52.6778	50.7572	50.8082	50.1091	50.8492	51.562	51.7632	51.1363	50.5909	51.2303	50.7361	51.3421	51.2433	51.287	51.2786	51.803	51.9032	51.9971	52.6294	53.0053	52.7799	53.2324	53.9846	53.6007	53.9797	54.4364	55.7983	55.0781	56.0037	55.9742	55.8003	56.2422	56.2775	56.24	56.5436	56.6994	56.4508	56.9503	57.6757	57.5195
	53.0173	52.8359	52.061	52.8547	51.9352	52.491	52.549	52.5239	52.0335	51.8536	52.3726	51.1788	51.6529	51.8082	52.9713	53.4668	52.7221	52.5911	53.0624	53.5188	53.7632	54.5001	54.8262	55.3436	56.2851	56.9032	56.9229	57.8987	57.9396	58.9481	59.1011	59.6472	60.2637	60.7766	61.0821	62.6064	62.7883	63.8108	63.6124	64.0273	64.5962	65.0496	65.1895	65.8995	66.3807	66.4848	65.9746	67.7328	67.1906
	57.6752	57.4941	56.6571	57.6291	56.1176	56.5385	55.8593	54.6705	55.0915	54.2098	52.2243	52.0999	52.0832	52.6859	52.9784	53.3247	52.7947	52.6863	53.0941	53.3884	53.9809	53.5997	53.6956	54.1865	53.8953	54.4518	54.3215	54.9938	54.9105	54.243	55.0436	54.4949	54.2119	55.6	55.7601	57.4517	56.2419	57.3495	57.5819	57.2718	57.6311	57.2859	57.5612	57.9699	57.8206	58.2338	58.5989	59.0416	58.7739
	38.1826	37.4481	37.3605	37.4557	36.314	36.6246	36.7579	35.8246	36.301	35.5196	35.7602	35.8176	34.9567	35.2032	35.7424	36.3477	35.3613	34.9064	35.8004	35.3904	36.3117	35.4284	36.3854	36.37	37.1895	36.6135	36.3707	37.7335	36.8837	36.9213	37.7122	37.8701	37.6169	37.4748	38.3702	38.6515	38.4602	38.7038	39.472	38.907	39.1519	39.0085	39.1033	39.9143	40.1606	39.5294	39.8272	40.4269	40.7708
	65.6918	65.7707	64.4044	65.2091	64.3437	64.8963	64.8376	64.4058	64.8839	63.6721	64.4239	63.8696	64.5926	64.3579	64.579	65.1078	63.48	63.7169	64.1504	64.4139	64.4341	65.0289	65.1032	65.0996	66.0442	65.8834	66.2818	67.0138	66.6239	66.5308	66.5302	67.152	66.6734	67.6488	68.1941	69.5411	68.6758	70.0356	70.4587	70.6493	70.6527	70.8546	70.9065	72.2806	71.4033	72.6489	73.1633	73.8661	73.3709
	66.3694	65.9787	65.9285	66.2831	65.8599	66.5356	66.1816	65.4727	66.2095	65.6496	66.1253	65.9536	66.4086	66.9562	67.356	68.0761	66.8713	66.9577	67.5467	67.6277	68.5133	68.337	68.8641	68.9152	70.0024	70.3474	69.8722	70.42	70.5843	70.9012	70.7232	70.613	70.5504	71.2341	71.5314	72.9085	72.3427	73.0888	73.5294	73.4068	73.6417	73.3523	73.3057	74.7952	74.2562	73.6149	74.1724	75.2062	74.5996
	53.1692	52.0107	51.5658	51.9746	50.6143	51.076	50.8633	50.4403	50.3911	49.6659	48.426	48.021	48.2442	48.1701	48.2941	49.0336	46.9622	47.3335	47.4476	47.6545	47.6271	47.3686	47.7237	48.0078	47.9165	48.5806	48.6177	49.0671	49.2869	48.7647	48.8889	49.3004	48.9564	49.614	49.9949	51.0696	50.3306	51.0731	51.0358	50.9071	50.8449	51.0071	50.9853	51.0901	51.1978	50.7918	50.7018	51.4454	50.7372
	52.4085	51.8056	51.465	51.9701	51.361	51.6131	51.4311	50.6622	51.0761	50.4507	50.1613	49.5021	49.2734	49.6777	49.7404	50.1053	49.0099	48.786	49.5144	49.2589	49.6158	49.4911	49.9463	49.797	50.2124	50.069	50.128	51.2156	50.8531	50.5586	50.759	50.9344	50.8811	51.1644	51.7568	53.0436	52.8476	53.4966	53.4389	53.5556	53.785	54.2573	54.5298	54.7216	54.2105	54.9757	55.0509	55.8234	55.1558
	66.5525	66.2117	65.1115	66.0956	64.6797	66.1355	65.6671	65.2818	65.6875	65.3706	64.7059	64.7408	65.0356	65.4697	66.1222	66.6599	65.7559	66.1696	66.6254	67.562	67.9093	68.3349	67.6818	68.5655	68.9492	69.4486	70.2213	70.6248	70.2421	70.5024	70.9175	71.7874	70.8527	71.8854	72.4873	74.0484	73.775	74.7283	75.1866	74.6187	75.0423	75.3926	75.2843	75.8142	75.9114	76.0328	76.6354	77.7775	77.0748
	48.3431	47.6607	47.294	47.4249	46.7144	46.8247	46.5436	45.8874	46.2918	45.9087	45.1978	45.1938	45.3716	45.2414	45.7686	46.1133	44.8937	44.9181	45.422	45.04	46.3093	45.6397	46.2856	46.3453	47.2456	47.6719	47.269	48.5127	48.7493	48.4955	48.4738	49.2917	48.8393	49.5999	49.5239	50.316	50.2497	50.4437	50.5879	51.3745	51.469	51.3693	52.0279	52.4458	52.3233	52.8467	52.8437	53.7965	53.6678
	52.3813	51.5329	51.5923	52.1811	51.1912	51.6432	51.6482	51.1901	51.7559	51.4764	50.7923	50.5902	50.8571	51.3013	51.5343	51.9013	51.5884	51.8436	52.1134	52.1924	53.022	52.7432	53.1888	53.7074	53.6551	54.4063	54.1813	54.7612	55.0571	55.2672	54.9956	55.4257	55.3967	56.0723	56.7029	57.8597	57.2032	57.8566	58.4146	57.9627	58.7341	58.1589	58.5178	58.933	58.992	59.4397	59.8027	60.923	60.7207
	57.2297	57.0423	56.5832	56.6541	55.5292	55.6208	56.0724	55.1899	55.7009	55.1613	55.0657	54.4831	54.436	55.0443	55.9961	56.7615	56.0457	56.3583	56.8757	57.4708	58.0601	58.5226	58.3996	61.0881	61.5836	62.0548	62.7645	64.3592	65.0651	64.8241	65.3863	65.8334	65.8175	66.8254	66.6061	67.8019	67.0153	67.9729	67.8348	68.2739	69.4871	69.8685	70.0543	70.1328	70.6533	70.4012	70.9219	73.7157	73.0661
	35.2727	34.1089	33.3533	33.728	33.0775	33.2593	32.6881	32.2328	32.6166	32.1314	31.8298	31.8445	31.2484	31.8233	32.3203	33.5321	32.7239	32.7129	33.6739	34.2249	35.3108	36.0013	36.4689	38.2227	40.0003	41.8074	42.3999	44.2356	45.7349	45.6304	47.5449	48.9629	48.6945	49.4365	49.8094	50.6838	50.2516	51.197	51.0662	51.4076	51.6678	51.7258	51.5184	51.9245	51.4618	51.5869	51.0185	51.1731	51.2769
	36.1674	36.2106	35.3551	36.0541	35.0723	35.9427	35.1503	34.4566	35.0336	34.792	34.2327	33.5235	33.9055	34.5826	35.8033	36.1415	35.4745	35.6894	35.9564	36.3963	37.2032	36.7381	37.9703	38.0218	38.7813	39.5437	39.3927	39.8059	41.2137	40.7692	41.2456	41.8136	42.0138	42.9022	42.4534	43.5346	43.0897	43.7397	44.3251	43.6267	44.3486	44.1993	44.8463	44.8708	45.0955	45.0453	44.6848	46.2037	44.9031
	60.113	59.6943	59.0777	59.9469	59.6144	59.9381	60.3436	60.2908	59.9889	60.1016	60.0647	59.9895	60.4108	61.4463	62.4022	62.9053	62.6409	63.4631	63.8105	64.1582	64.8816	64.923	65.6214	65.8647	66.303	67.3755	67.0913	68.2532	68.167	67.653	68.2912	68.6058	68.1264	68.4739	69.1415	69.9952	69.4054	70.7313	70.8025	70.853	71.0539	71.0069	71.5567	71.7303	72.0623	72.3619	72.6552	73.1201	73.0273
	47.2318	46.5943	46.8496	46.932	46.7086	47.1339	47.0544	47.2898	47.7322	47.5933	47.4873	47.542	47.5009	48.3645	48.7859	49.5053	48.8249	49.5566	49.8438	50.0668	50.8069	51.2428	51.9482	51.6853	52.8785	53.5215	53.5831	54.6435	55.0759	54.8577	55.2656	55.6667	55.6537	56.8	57.3415	58.884	58.4	59.7496	59.9823	59.8628	60.285	59.7604	60.9037	60.8858	61.2524	61.4185	61.5644	62.3239	61.4625
	47.9414	47.5601	47.4916	47.766	47.0276	47.4762	47.5654	46.5971	47.0617	46.3977	46.4172	46.1401	45.9163	45.9764	46.4769	46.8893	45.9263	45.4469	46.2035	46.1966	47.1675	46.432	47.4932	47.581	48.0605	48.3634	48.393	49.6891	49.2853	49.6947	50.0082	50.5979	50.7396	51.5392	51.5964	52.4536	51.9813	52.7791	53.2838	53.1548	53.3403	53.6541	53.9755	54.2965	54.3199	54.3296	54.7836	55.5788	55.3262
	59.5814	58.9904	58.4897	58.6167	57.5365	58.2107	57.6636	57.0182	57.5062	56.9175	55.1526	55.7234	56.3101	57.8389	58.3452	59.2325	59.2757	59.7175	61.0254	61.9018	62.5291	63.6928	63.7321	64.7725	65.7157	66.7452	67.6424	68.861	69.1212	69.0868	69.7151	70.2162	70.639	71.9743	72.5243	75.4547	75.219	76.2868	77.1867	76.4555	75.9159	75.9656	75.7615	76.2829	76.2326	76.5023	76.7379	77.2906	76.1403
	53.0751	53.1551	52.7799	53.7699	52.6387	53.3727	53.1524	53.1121	53.1119	52.9468	51.2253	51.1636	51.2765	51.96	52.1285	53.2237	52.0842	52.5292	52.849	52.916	53.8104	53.5653	53.8085	53.9739	54.687	55.1375	55.3288	55.7886	56.1467	56.0181	56.5387	56.7513	56.0677	57.6628	57.3119	59.0508	58.298	58.9353	59.4074	59.2728	59.1972	59.584	59.9922	60.008	60.2125	59.9051	60.1463	61.3581	60.6288
	46.357	46.1142	45.6536	45.8374	45.0232	45.0797	45.3375	44.8788	45.1531	45.0157	44.2378	43.9738	44.4002	44.7784	45.7093	45.8726	45.2795	45.4398	46.0146	46.0373	46.7739	46.7751	46.8515	46.9839	47.2295	48.1252	47.6797	48.8796	48.3929	48.4044	48.5264	49.0844	48.6317	49.2014	49.8902	50.8394	50.584	51.3137	52.0446	51.5686	51.6659	51.1317	51.8238	52.0352	52.3047	51.9065	52.3446	52.8263	53.2202
	51.919	52.2239	51.0859	51.0624	50.5343	50.5156	50.2244	49.4902	49.8092	49.3825	47.2056	46.8097	47.6072	47.6874	47.7112	48.181	48.2413	48.6763	49.2084	49.5937	50.5751	50.8965	51.4518	51.6388	52.574	53.6789	53.4716	54.2891	55.1703	55.4253	56.2339	56.6835	56.9414	59.007	58.4801	59.7123	59.9781	60.8361	60.7743	61.2729	61.6273	61.7858	61.8772	62.2158	62.9204	63.6118	63.6778	65.3008	64.5309
	52.8881	52.691	51.915	52.6269	52.1356	52.1352	52.0751	51.8518	51.7086	51.4583	51.9324	51.3538	51.683	51.57	52.3132	52.2755	51.5021	51.5776	51.4936	52.262	52.3417	52.329	53.0618	53.093	53.3847	53.8659	54.0428	54.1774	54.5821	54.3277	54.2786	55.1825	54.9654	55.6088	56.4968	58.0732	57.7114	58.5235	58.8827	58.8107	59.2009	58.6841	59.3259	59.7261	59.6376	60.4226	60.2833	61.0593	60.4533
	43.8047	43.1638	43.465	44.0635	43.003	43.667	43.2385	43.4328	43.2589	43.0493	42.6915	42.6084	42.895	43.34	43.9428	44.5399	43.5683	44.1466	44.6444	45.2278	45.6463	45.9454	46.2801	47.1313	47.2986	47.2637	47.9768	48.7908	48.9743	48.919	49.7163	49.9679	49.9012	52.2721	52.8909	55.0599	54.3711	55.6748	57.1234	56.9146	57.2008	56.9644	57.7786	57.9842	58.4646	58.0235	58.7759	60.3998	59.8103
	49.2052	48.744	48.6371	49.64	48.743	49.0376	48.8802	48.5208	48.4863	48.4143	47.3675	46.8754	47.0542	47.4527	47.7805	48.3511	47.7428	47.5943	48.6695	48.4028	48.8947	48.8407	49.3094	49.2382	49.9398	50.3292	50.4817	51.2623	51.8249	51.851	52.4195	53.1183	53.1552	54.7545	55.3751	57.4654	57.1317	58.7888	59.7341	59.9606	61.1996	61.7946	62.3415	63.3737	63.6845	64.4508	64.81	66.5997	66.4427
	41.7474	41.4098	40.7766	41.3298	39.8034	40.6445	40.7824	40.1597	40.5124	39.9733	38.7942	38.4249	38.7611	39.4179	39.7535	39.6113	38.9882	39.4413	39.4477	39.1457	39.9235	39.6128	39.5412	39.3729	39.9515	40.4683	39.4878	40.5783	40.1605	40.1933	40.9117	41.3064	40.2712	41.1965	41.3911	43.2662	42.4388	42.879	43.3647	43.1248	43.1114	42.9296	43.6027	43.5812	43.4883	43.7903	43.2858	44.6498	43.8479
	54.7245	54.7049	53.9818	54.5321	53.6319	54.5944	54.5417	54.2625	54.2201	54.0394	53.6901	53.6612	53.9596	54.932	55.0732	55.7308	54.7745	54.7212	55.4284	55.9478	56.4358	56.4214	57.2607	57.8649	58.2449	58.9092	59.1333	59.8267	60.2013	59.6033	60.1136	60.3323	60.0445	61.1413	61.7309	63.6206	63.1476	63.3339	64.5268	64.529	64.749	64.7004	64.6244	65.4476	65.3311	65.9393	66.5784	67.5104	67.3024
	48.2523	47.7883	48.0033	48.7545	48.2233	48.8838	48.6648	48.498	48.833	48.9482	48.1008	48.643	48.8561	49.5089	50.2668	50.7189	49.9555	50.4668	51.109	52.3015	53.3739	53.8723	54.1073	54.673	56.4341	56.9027	57.0494	58.271	58.4528	58.9925	59.8457	60.6049	61.0183	62.7607	63.9882	66.2856	66.465	67.4916	68.0693	67.6679	68.2513	68.1395	69.1085	69.5409	69.7937	70.1138	70.4522	71.3347	70.9688
	53.3306	53.1578	52.8037	53.1554	52.7747	53.3398	52.8625	52.5762	53.1802	52.6664	52.0451	52.143	52.2422	53.2166	53.6402	54.0068	53.7127	53.9189	54.8996	54.6395	55.7362	55.9132	55.7842	56.0647	56.8908	57.469	57.6024	58.3511	58.5778	57.8447	58.2685	58.8956	58.4171	59.7787	60.3778	61.8418	61.4795	62.0816	62.6904	62.6925	62.2214	62.7386	62.4073	63.0503	63.4294	63.4485	64.2226	65.1183	64.4747
	43.622	43.3729	42.9401	43.323	42.7458	43.1727	42.9907	42.92	42.5966	42.5648	42.3918	42.059	41.8647	42.0063	42.5914	42.9143	42.2072	42.223	42.4198	42.0942	42.8308	42.7403	43.4484	43.1782	43.617	43.8162	43.9046	44.7331	44.5367	44.397	44.7663	45.0762	44.8361	45.5335	45.5773	46.9411	46.7033	47.4674	47.4942	47.4952	47.6828	47.6776	48.0854	48.3562	48.3376	48.7738	48.9912	49.8652	49.4712
	45.2609	45.2421	44.9276	45.9294	44.9505	45.1099	45.3837	44.8314	45.3737	45.1513	45.8279	45.5488	46.071	46.527	47.2092	48.1414	47.3389	47.8675	48.2561	48.9025	49.3932	49.8829	50.0407	50.1698	50.6451	51.0126	51.2062	51.991	52.3465	52.0351	52.5708	53.2541	53.2591	53.7414	53.6155	55.4979	55.2654	55.5062	56.802	56.693	57.3856	56.7584	57.0405	58.1513	57.7965	58.7131	58.9723	60.4091	60.1515
	49.5918	48.7702	48.1913	48.4663	47.9271	47.8829	47.6131	47.0642	47.3823	47.348	45.9838	45.9288	45.8997	46.4359	46.712	47.3749	47.5934	47.4941	47.9637	48.4089	48.5622	48.6536	48.7655	49.3939	49.9926	50.2874	50.2214	51.3086	51.1121	51.4823	51.4981	52.351	51.5816	52.9145	52.7701	54.0795	53.4139	54.8316	54.9579	54.6359	55.212	55.2338	54.7868	55.1238	55.6942	55.7239	55.9127	56.345	56.2302
	44.3723	43.5224	43.4765	43.84	42.7409	43.4326	43.2063	43.0706	43.0684	42.673	42.6247	42.3221	42.2654	42.9214	43.4034	44.3279	43.5662	43.8602	44.7058	45.0471	46.4257	46.7724	47.6642	48.1298	49.1402	49.7786	49.566	51.2254	51.1439	51.6399	52.1501	52.8729	52.7671	53.2455	53.8774	55.1816	54.6731	55.7795	56.0673	56.2955	56.654	56.735	56.7479	57.3839	57.5228	57.6538	57.6096	58.0665	57.9884
	40.5729	40.8139	41.9315	41.8346	42.2963	43.2917	43.098	43.018	43.6797	44.1787	43.4755	43.2919	44.0712	43.694	44.2223	44.4462	44.4693	45.0599	45.3299	45.93	45.735	47.4823	47.9665	49.0801	49.9774	51.9305	52.4208	53.5643	54.9951	56.5614	57.416	58.5778	60.2167	60.7796	61.9243	62.5205	64.4873	65.0468	65.6731	66.508	67.2782	68.5651	69.3571	70.4266	71.31	72.151	73.1354	73.4888	74.5864
	48.8376	49.3874	50.3364	51.1086	51.4471	52.5737	52.037	52.2041	52.2965	52.9227	51.5509	51.7731	51.9007	52.3046	52.3588	52.2438	52.3456	52.2289	52.7555	54.0941	54.6457	55.4747	56.8643	57.502	58.6903	59.7961	60.2274	60.7904	61.846	63.4275	63.4291	64.6814	65.8537	66.5398	67.4704	68.075	69.372	70.174	70.3583	70.9792	72.3688	72.3786	73.1561	73.9565	74.899	75.9675	76.2146	76.0715	76.692
	21.1329	21.2351	21.6764	21.4189	21.8711	22.559	22.5126	22.0172	22.249	22.7961	22.3187	22.5192	22.7569	23.289	23.1643	23.6984	23.9206	24.2387	24.9939	27.0671	27.6216	28.8832	29.9736	31.293	32.1315	33.7402	34.3173	35.5378	36.2106	37.9571	38.4129	40.0462	40.4858	41.2474	41.7788	42.3752	43.4151	43.9962	44.5373	45.3849	46.6385	46.4457	46.9704	47.6196	48.3897	48.3915	49.2419	48.6676	50.0491
	36.1812	36.4246	36.8138	36.363	36.1242	36.3841	35.9267	35.3165	35.0413	35.4033	33.9717	33.6258	34.2125	33.7205	33.4684	33.2814	33.1685	33.3514	34.0272	34.6676	33.9296	34.8087	34.9535	35.5218	35.4819	36.3574	36.0275	36.9194	37.156	37.503	37.5772	37.7689	38.5101	38.8629	38.8275	39.0182	39.3553	40.0632	39.8909	39.8211	40.2414	39.702	40.6885	40.5953	41.2124	40.8679	41.5782	41.4046	41.9701
	39.5453	39.5442	39.7864	39.4293	39.422	39.6157	39.2151	38.8578	38.9499	38.9801	37.5073	37.1224	37.2323	37.3504	36.9165	37.0112	36.9481	36.8365	37.3936	38.0119	37.7568	38.3345	38.7521	39.3433	39.4578	40.1091	40.636	40.9078	41.3943	41.7587	42.2586	42.2923	43.2894	43.183	43.8135	44.0727	44.5209	44.9109	45.1369	45.4781	46.0574	45.909	46.2934	46.5301	46.995	46.7572	47.0554	47.2284	47.8293
	43.5971	43.4465	43.2629	43.3198	43.2591	43.7915	43.283	43.361	43.3267	43.3169	43.3829	43.0065	43.2428	43.2491	42.9748	43.5291	43.2967	43.9062	45.0236	45.0614	45.6412	45.9759	46.6073	47.835	47.426	48.3299	49.0891	49.196	49.4708	51.2392	51.8229	52.2598	53.3096	53.4595	53.6957	54.282	55.115	55.6835	55.1466	55.9375	56.9439	56.3787	56.7819	57.5741	58.1774	57.8604	59.0708	58.4802	59.0723
	39.664	39.7561	39.8731	39.8957	39.5632	40.1782	39.761	39.3063	39.026	38.6888	37.4735	37.4126	37.596	37.1937	37.1358	36.8828	37.0863	37.1988	37.8891	38.3985	38.2922	39.072	39.4194	40.0459	40.5019	41.1132	41.3216	41.772	42.2338	42.8924	43.2589	43.5159	44.4819	44.5282	45.7693	46.268	46.7486	47.3758	47.209	47.7281	48.8461	48.5087	48.957	49.5843	49.9704	49.8143	50.7766	50.4606	51.0724
	50.608	50.6071	50.7722	50.4253	50.4736	50.9506	50.9342	50.2197	50.7825	51.069	49.8459	49.7742	49.8063	50.0619	50.3095	49.686	49.6439	49.7444	50.4617	51.3777	51.2694	51.6952	52.4928	53.3627	54.0076	55.4998	56.2487	56.7256	57.5318	58.8695	59.8595	61.2313	62.4567	63.1808	63.2814	64.3715	64.6956	65.7945	66.0366	66.6015	67.3905	67.5695	68.8709	70.0511	71.617	71.8967	73.6551	74.116	75.0445
	47.3827	46.6685	46.782	46.6026	46.9119	46.9253	46.7478	46.1531	46.2345	46.218	44.3543	44.0726	44.1855	43.9446	43.743	43.6854	43.8227	43.4494	44.1965	44.5928	44.4672	45.2308	45.4438	46.3794	46.299	46.7172	47.3594	47.4276	47.7954	48.6647	48.431	49.4332	49.721	50.3707	50.5177	50.7493	51.428	52.1534	51.7035	51.7971	52.5297	52.5218	52.6262	53.3853	53.7565	53.5118	54.1989	53.9854	54.2646
	35.4781	35.9744	37.4809	37.2814	37.6824	38.6913	38.1468	38.4473	38.9218	39.3408	38.5365	38.465	39.4676	40.0329	39.9417	40.4014	40.3123	40.6346	41.4146	41.9907	43.0399	43.6781	44.7421	45.8482	46.8452	47.9233	48.8246	49.4722	50.647	51.8465	52.3802	53.8386	55.714	55.9177	56.7485	57.5374	58.5415	59.5369	59.1456	59.9374	60.6743	60.8543	61.0637	61.8045	62.5223	62.7785	63.1561	63.064	64.0125
	20.7479	21.3114	21.656	22.0488	21.5709	22.507	22.0216	22.085	22.567	23.0216	22.848	22.7637	22.9531	22.7104	22.6275	22.9959	22.8802	22.8265	23.5011	24.3921	24.1076	24.5719	25.076	25.7107	26.5959	27.8664	28.966	29.3327	30.6678	32.0504	32.8152	33.8352	35.4878	35.4049	36.475	36.9769	38.4964	39.371	39.7704	41.0255	42.6273	42.5471	43.4528	44.5309	45.577	45.9218	46.6177	47.3184	47.8349
	24.0916	24.5286	24.4537	24.744	24.7352	25.2194	25.398	25.1405	25.4652	25.4933	24.9043	25.22	25.0455	24.8333	25.1846	24.8711	24.5049	24.7143	25.1342	25.7577	26.2912	26.9098	27.7777	28.3434	29.4365	30.4813	31.7383	32.8304	33.3362	34.5355	35.7388	36.3566	37.7094	38.2321	39.5532	40.0513	41.6677	42.8466	43.3096	43.9811	44.9145	45.1926	45.88	47.0497	47.8996	48.4642	49.6608	49.9989	50.9643
	36.8716	37.1805	37.8829	38.0345	37.7179	38.0233	38.337	37.67	37.9137	37.9521	37.4382	36.8916	37.2342	36.6524	36.9495	37.4373	37.1135	36.7706	37.1955	37.8579	38.4544	39.3343	39.9925	41.1262	41.0151	42.1714	43.185	44.1845	44.1094	45.5107	45.5529	46.1967	47.1262	47.2163	47.8208	48.1239	48.7082	49.2768	48.9595	49.5879	49.9376	50.2959	50.2549	50.9253	51.0959	51.3392	51.1633	51.584	51.8883
	46.5242	46.4515	46.8193	46.6462	46.728	46.8819	46.0997	46.1461	46.1228	46.0804	44.1024	44.2977	44.2599	44.0502	43.7195	44.0161	44.2102	44.207	44.068	44.2091	44.3263	44.9009	45.5823	45.6261	46.5379	47.1976	48.139	48.6121	49.053	49.9861	49.946	51.0054	51.5628	51.8351	52.3777	52.4848	53.1684	53.9209	54.0259	53.898	54.9596	54.673	54.9632	55.3922	56.0822	56.1088	56.4566	56.633	57.05
	54.648	54.9453	55.1967	54.9834	54.904	55.2434	55.108	54.8899	54.9776	55.2336	49.5915	49.5288	49.7219	49.2801	49.0623	49.2608	49.1663	48.6722	49.1607	49.7021	49.5526	50.0514	50.5924	51.0117	51.9352	52.5017	53.0836	53.818	54.8102	55.8877	56.4757	57.3913	58.9558	59.4485	60.8642	60.8073	62.1167	63.1696	63.4518	64.0867	65.3569	65.7108	66.151	66.9681	67.5492	67.8335	68.4019	68.8412	69.3785
	45.5628	45.6108	46.0357	45.6579	45.6359	46.0898	45.596	45.4924	45.4248	45.5114	43.34	43.5317	43.618	43.4586	43.204	43.14	43.138	43.0548	43.6027	44.1203	44.219	44.7653	45.4039	45.7719	46.4446	47.4481	47.8665	49.0029	49.6574	50.6149	51.1377	52.3702	52.98	53.298	53.9251	54.5327	55.2078	55.7779	56.3273	56.8139	57.642	57.6298	58.1793	59.1324	59.5036	59.8337	60.0395	60.3187	60.8049
	44.218	43.9451	43.9992	43.7732	43.2283	43.4659	42.4001	41.9714	41.757	41.7623	39.9399	39.8315	40.1745	39.8775	39.1764	38.9102	39.5382	38.839	39.2687	40.2888	40.3321	40.6545	40.7035	41.4082	41.7032	42.9359	43.1484	43.79	44.0048	45.3097	45.3444	45.8574	46.4648	46.6298	47.8116	47.671	48.2301	49.0847	48.9222	49.6068	50.3554	49.9874	50.492	50.649	50.9393	51.5582	52.1881	52.5105	52.2401
	37.2635	37.3169	37.6848	37.6662	37.8261	38.3492	37.9099	37.8295	37.6444	38.4871	37.2188	37.867	38.2053	37.5216	37.6087	37.9073	38.1492	38.4291	38.8175	39.5149	39.3392	40.2966	40.567	41.6682	41.8466	43.173	43.2307	43.8446	44.2806	45.3402	45.9011	46.1522	47.1849	47.7401	48.8151	49.218	49.5709	50.6063	51.0577	51.7505	52.8169	52.3356	53.2125	53.2673	54.064	54.1229	54.7427	55.0949	55.2428
	34.3431	34.4512	34.0811	34.7051	34.6792	35.348	35.2728	35.492	35.3485	35.786	34.8264	35.2864	35.884	35.8607	36.0959	36.2959	36.3595	36.4046	37.1472	38.2609	37.4736	38.5642	38.6258	40.2427	40.8018	41.8499	42.5491	42.4718	43.8963	45.5969	46.2655	47.2016	48.8054	49.5502	50.3524	51.0771	52.1605	53.1092	53.6511	55.0046	56.1183	56.3116	56.8803	58.1784	58.9791	59.3932	60.3581	60.6404	61.6999
	37.8849	37.601	38.2613	37.4296	37.3701	38.0598	37.0874	36.7906	36.6607	36.615	35.4537	34.9864	35.4482	34.8395	34.8002	34.9298	34.6495	34.8324	35.3402	35.9322	35.9373	36.7051	36.5635	38.0818	37.6387	38.3295	38.863	38.9345	39.5493	39.8261	40.1952	40.3236	40.9945	40.8122	41.2131	41.8555	42.2596	42.4885	42.5002	43.6469	43.8709	43.5024	44.0114	44.5017	44.4024	45.174	45.2065	45.0065	45.5049
	52.4827	52.48	53.0125	52.7556	52.5547	52.2385	52.0811	51.3753	51.6418	51.6156	49.0472	48.4715	48.9151	48.7311	48.5578	48.2155	48.5095	49.0313	49.2168	50.5978	50.7856	51.3356	52.0836	53.1139	53.8283	54.8597	55.3862	56.3414	56.3222	57.6912	57.8436	58.2417	59.3554	59.2594	59.9976	60.1893	61.5401	61.7449	62.0022	62.2105	62.7957	62.643	62.3373	63.3692	62.9704	63.0047	63.1704	62.8069	63.3656
	41.9401	42.0802	42.1241	41.6683	42.1033	41.774	41.4504	41.0215	41.2462	41.2559	39.5035	39.2922	39.4878	38.6161	39.0532	38.8148	39.1354	38.6616	39.3632	39.7601	39.705	40.4978	40.7826	41.0246	41.4164	42.0307	42.3199	43.0698	42.8924	43.8019	44.0633	43.91	44.8808	44.4846	44.9129	45.1814	45.7678	46.3063	46.058	46.6455	46.9101	46.7406	46.9926	47.5027	47.8776	47.8462	48.1498	47.9087	48.5632
	46.3744	46.428	46.8799	47.1365	47.4412	48.1591	48.2059	48.1173	48.0028	48.4682	47.1557	47.4954	47.6982	47.5846	47.7629	47.483	47.8785	47.8315	48.4923	49.3944	49.5573	49.7882	50.1602	50.7877	51.2516	52.4095	52.3149	53.3232	53.4202	54.3701	54.5891	55.5304	56.1017	56.2747	56.8014	56.9974	57.7954	58.605	58.2064	58.8773	59.1069	59.2908	59.6427	59.9	60.2486	60.1448	60.1117	60.0229	60.4194
	40.0429	40.5639	41.0875	41.2482	41.5872	41.2038	41.3158	41.3086	41.2231	42.0791	42.2995	42.5479	43.1081	43.1562	42.6845	42.8413	43.0671	42.8866	43.8965	44.5323	45.1718	46.7681	47.3927	48.4538	49.9329	50.9674	52.1726	53.2857	54.2643	55.5562	56.5214	57.332	58.8759	59.3983	60.4613	61.184	62.1494	62.8131	63.0673	63.6912	64.8912	64.4775	65.3338	66.3597	66.5597	66.4971	66.674	66.7821	66.7512
	39.2584	39.2156	40.3499	39.845	40.067	40.153	40.3654	39.8361	39.788	39.62	39.3513	39.1399	39.8111	39.5234	39.4635	39.2057	39.6759	40.1836	40.3507	40.9779	41.4897	42.2157	43.0922	43.9858	44.9718	46.7624	47.3928	48.2471	49.244	51.015	52.1225	53.0113	54.2496	54.9638	56.2033	57.0134	58.2336	59.2319	59.3929	60.7353	61.4666	62.4257	63.0613	64.2717	64.9458	65.2159	66.4863	67.4381	68.5096
	37.7185	37.7077	38.9394	38.8391	39.1153	40.0067	39.7381	39.6774	40.1817	40.7793	39.745	40.1205	40.2994	40.1654	40.9948	40.3823	41.0386	40.8592	41.4826	41.8392	42.352	42.8975	43.383	44.3759	44.802	46.5509	47.3626	47.842	48.9941	49.7202	50.9375	51.9375	53.2236	54.0851	55.6278	56.369	58.1309	59.4459	60.1532	60.8816	61.9827	62.5704	63.4043	64.3673	65.3244	65.3337	66.5124	66.9909	67.3579
	74.0908	74.3349	76.0201	76.5759	77.0091	77.8814	78.0951	78.6767	79.22	79.5925	77.5607	77.6412	78.0148	77.8906	78.1768	77.6337	78.1031	78.2041	78.403	78.7652	78.9048	79.2056	79.9496	80.5825	81.4167	82.0567	82.5091	83.0157	83.918	84.6666	85.0216	86.1255	86.9652	87.6256	87.7806	89.1383	90.086	91.1992	90.9275	91.6573	92.5334	92.7636	92.8538	94.0911	94.1671	94.1023	95.1311	95.12	95.8339
	47.1253	46.9095	47.6437	47.4504	47.2067	47.7617	47.6896	47.4099	47.668	47.3581	45.932	46.7801	46.431	46.7452	46.5035	46.7921	46.6646	46.3591	47.012	46.5586	47.2616	47.6829	48.0292	48.5212	49.674	50.1784	50.5195	50.8569	51.5533	53.1107	53.7218	54.0982	55.1147	55.9271	56.487	55.9507	58.0076	58.2019	58.8959	58.999	60.0157	60.3278	60.4225	60.6412	61.5363	61.4896	61.5481	62.1694	62.6495
	34.9372	34.6248	34.9815	34.4596	33.7285	34.6759	33.9198	33.2771	33.5934	33.3556	32.2594	32.5598	32.5612	31.519	31.7726	31.4835	31.775	32.0315	32.7906	33.3184	33.4663	34.0275	34.9906	36.5277	36.7632	38.0872	38.7294	39.1836	40.016	40.7692	41.314	41.876	42.6553	42.9339	43.6621	43.9189	44.7227	44.7363	44.9008	45.9243	46.5931	46.2647	47.44	47.4831	47.5838	47.9437	48.3444	48.3019	48.9983
	28.2695	28.9667	29.1022	29.497	29.4855	30.4458	30.2758	30.3161	30.5116	30.9696	33.2836	33.2609	33.7805	33.4885	33.6102	33.6531	33.4377	33.498	33.7467	34.7161	34.0273	35.2445	36.3926	37.6271	38.4364	40.6719	41.8696	43.1398	45.3254	47.3903	48.2896	49.9424	52.0549	53.0726	54.3957	55.9467	57.1883	58.8667	60.0867	60.5932	62.412	63.22	64.4663	66.3107	67.5479	68.1552	69.415	70.4532	71.7383
	30.575	30.5621	31.132	31.2325	31.724	32.6661	32.7291	32.412	33.1027	34.338	37.1683	37.0173	37.396	36.6424	36.6859	36.8584	36.6692	36.3936	36.9364	38.115	38.1939	39.1242	39.5154	41.0359	42.3757	43.6939	45.2343	46.7249	47.8895	49.8178	52.2307	53.9833	55.3111	56.9437	58.869	60.1364	61.7246	63.0172	65.3205	67.4723	69.1432	70.2729	71.5329	73.6387	75.6456	77.2871	78.202	79.2263	81.2958
	39.1552	38.9147	39.5444	38.9229	39.0697	39.179	38.7665	38.8003	38.9682	39.3245	37.9326	37.9956	38.1326	37.4397	37.5625	37.0757	37.3284	36.839	36.8931	37.0013	36.8447	37.7426	38.0172	39.0348	39.7954	40.7149	41.5339	43.0648	43.7689	44.8524	45.9955	46.5692	48.3953	48.7612	49.8582	50.3084	51.1876	52.2204	53.2672	54.2776	55.9311	55.4705	56.6425	57.2984	58.6296	58.3553	58.9771	59.6916	60.3388
	36.31	36.1448	36.5699	36.3276	36.011	36.7288	36.7814	35.9113	36.2439	36.1956	34.3675	35.2743	34.8832	34.6261	34.2032	34.3336	34.3141	34.0258	34.581	34.5785	34.2975	35.3099	35.7229	35.8389	35.72	36.8917	37.7779	37.9123	38.1337	38.8674	39.5503	39.9529	41.7893	41.5942	42.1555	42.9084	43.8235	44.6995	44.3865	45.774	46.9333	46.4915	47.4038	47.9666	48.3715	48.9581	49.0911	49.9601	50.5229
	41.2879	41.2973	41.5541	40.6611	40.048	40.4761	40.094	39.4884	39.4901	39.4995	37.7008	37.7454	37.41	37.5803	37.3932	37.3744	37.5508	36.8857	36.9673	37.4402	37.6276	37.6901	38.1556	38.796	39.8548	40.1982	40.6138	41.4305	41.6731	42.186	42.7588	43.5769	44.0047	44.3597	44.9746	45.7049	46.0242	46.474	47.0082	47.3881	47.9817	48.2837	48.7826	49.2486	49.6554	50.1233	49.8129	50.4738	51.0671
	54.1067	53.1074	53.7617	53.8431	53.5074	53.6877	53.0653	53.1039	52.9928	52.9177	47.8905	48.2595	47.9701	47.6601	47.6617	46.9597	47.2752	46.6399	46.756	47.5597	47.6662	48.1704	48.5555	49.1254	49.8253	50.718	51.3181	52.0187	52.8274	53.4674	54.8304	54.7554	56.04	56.2215	57.1078	57.6739	58.5923	59.3408	59.4137	60.2079	60.7542	61.0548	61.5665	61.9402	62.7545	63.1519	63.6966	63.3718	63.9676
	38.3795	38.5992	39.0934	38.6596	39.0701	39.6954	39.0941	38.57	38.9019	38.995	38.1223	38.5027	38.945	38.893	38.6629	38.8378	38.5365	38.9694	39.9787	40.4428	40.5744	41.7075	42.5413	43.3623	43.7433	45.0527	45.3484	46.655	47.1527	48.5117	49.0727	49.8851	51.0784	51.4373	52.8635	53.3207	54.9865	55.36	55.697	56.6539	57.5709	58.0374	58.2128	59.6061	60.6126	60.6807	61.6569	62.0924	63.0373
	40.4946	40.7972	40.8108	40.5148	40.2249	40.1335	40.0239	39.7894	39.6338	39.4961	37.8053	37.6879	37.7957	37.4775	37.2517	37.1512	37.1988	37.0307	37.637	37.929	38.3201	39.1577	39.6349	39.9136	40.0643	41.3938	42.0935	42.7371	43.072	44.166	44.3393	45.0084	46.2529	46.5374	47.1822	47.7102	48.2951	49.2552	49.3334	49.9118	51.0321	51.1712	51.6225	52.5564	52.7997	52.675	52.9303	53.5019	53.5275
	45.4391	45.0447	45.5839	45.2486	45.9759	46.4914	45.5674	45.441	45.5898	45.8076	43.221	43.2099	43.4662	43.2098	42.3793	41.7693	42.0598	41.2888	41.6114	42.5271	42.309	42.6674	43.4548	44.1219	44.9065	45.7271	46.5253	47.594	48.4728	49.7265	50.8344	51.4928	53.3985	53.6731	54.5919	55.0015	56.5424	57.3909	57.6991	58.6858	59.9531	60.5917	60.6965	61.2396	62.2484	62.2596	63.1002	62.6858	63.7694
	30.1508	30.8982	31.3314	32.2074	32.3087	32.0339	31.9112	31.3723	31.5091	31.0028	43.7131	86.6003	121.669	122.827	135.788	134.858	137.058	132.403	133.259	139.882	140.094	135.083	139.824	140.396	140.449	142.457	132.474	136.229	135.847	133.119	137.316	136.039	135.265	135.498	132.847	128.783	120.464	123.182	130.96	137.828	138.021	147.604	144	146.216	142.705	135.578	137.468	139.828	142.322
	54.5737	55.0944	55.7951	57.0108	57.2205	57.0902	56.7756	56.7593	56.6576	56.0437	54.7013	54.615	54.9702	55.0753	56.0975	57.1351	57.935	58.4456	59.3389	60.72	61.4693	62.1269	63.1832	64.1511	65.1118	65.8288	66.5737	67.6123	68.6779	68.5867	69.714	71.4983	71.6193	71.974	73.3574	74.1688	74.726	75.1599	76.3541	76.9114	76.8131	77.9321	78.1324	78.9231	78.9551	79.6192	79.6581	79.6382	80.5891
	44.9554	46.1161	45.7559	47.8597	48.5722	48.1218	47.3633	47.3255	47.6538	46.7041	45.6468	46.0382	45.7806	46.114	47.6272	47.9919	49.0177	49.1419	50.0993	50.8953	51.6837	52.2545	52.9368	53.7295	54.7295	54.4768	55.3683	55.516	56.2796	56.4902	57.0248	58.5027	58.395	58.6078	59.6648	59.6665	59.9302	60.5859	61.7281	61.4802	61.5501	62.6353	62.7886	63.0763	63.5136	64.1684	63.67	63.4078	64.5695
	44.7847	45.4054	45.9542	47.3662	47.9141	47.719	47.3862	47.4711	47.312	46.9222	49.1105	48.6079	49.6751	51.0123	52.4621	53.4005	55.3543	56.0145	57.372	58.6277	60.8496	61.7901	63.4978	65.1045	66.9032	67.6976	68.8825	70.2022	71.7887	72.4461	73.3083	75.7233	75.7697	76.7909	78.5494	78.9745	79.8553	81.3394	82.6315	83.3159	83.9196	85.5759	86.4585	87.5627	87.7271	88.9278	89.0707	89.5676	91.1707
	41.9124	42.5992	43.5829	44.9078	45.5359	44.8598	45.4864	45.3104	44.7607	44.026	43.4132	43.6421	43.4464	44.2717	45.9677	46.9498	48.2332	48.9797	50.1969	51.1495	51.8421	52.6657	53.0939	54.65	55.7911	56.7421	57.8356	59.2128	60.1939	61.2996	62.1066	63.3667	64.1284	64.8332	65.7379	66.2597	66.4914	67.3977	68.8952	69.2202	69.1225	70.5301	71.097	70.6758	71.0717	72.7056	72.478	72.5209	72.6067
	47.9354	48.8934	49.2139	50.3152	50.3194	50.0352	49.2238	49.4655	49.0926	48.5581	46.8307	46.5205	47.0241	48.5958	49.6879	50.229	50.3131	50.711	51.4729	52.0795	52.8299	53.1558	53.7733	54.2161	55.4971	55.5348	56.4251	56.9012	57.1704	57.4945	57.7077	59.2157	58.7918	58.6457	59.9665	59.7689	60.0401	60.1566	61.1785	61.2539	61.3705	62.2749	62.3476	62.9696	63.0189	63.351	63.6264	63.0001	64.1914
	33.2209	33.847	34.0751	35.2197	35.399	34.4883	34.2938	34.1547	33.7844	33.7762	32.8065	32.6396	32.7074	33.2967	34.5493	34.842	35.3404	36.2844	37.1305	37.4911	38.5307	38.8678	39.4667	40.0775	41.0434	41.4451	42.287	43.1448	43.8986	44.1613	44.8396	46.5548	46.7721	47.1585	48.3865	49.0085	49.5757	49.7812	51.1098	51.0578	51.6789	52.6607	52.6345	53.9226	53.9774	54.5067	55.0201	54.6419	55.8599
	35.6889	35.8536	36.5497	37.2776	37.0916	36.3093	35.8838	36.2632	36.2211	36.4389	36.4643	36.2808	36.3096	36.8069	37.6156	38.6911	38.8329	39.1961	39.8773	40.537	41.6713	42.225	42.9395	43.4737	44.3535	45.0627	45.5697	46.2808	46.9824	47.5241	48.0415	48.9079	49.667	50.9139	52.5727	52.9895	53.3492	53.8931	54.7522	54.542	54.4696	55.9242	55.9959	56.6986	56.5879	57.2844	56.9678	56.3561	57.5156
	45.8837	46.2731	46.7926	47.9759	47.8519	47.5225	47.5069	47.1341	47.0283	46.5141	44.3933	44.0556	44.4355	44.7567	45.9722	47.4013	47.9372	49.0684	50.1989	51.2862	52.5579	53.2854	54.2482	55.8931	56.6455	57.5821	58.425	59.6744	60.8265	61.5985	62.576	63.9575	65.0614	65.4671	66.8145	67.6248	68.251	68.8547	70.1022	70.3101	71.307	72.8216	73.2887	74.2726	74.8328	76.0628	76.1115	76.1172	77.2764
	40.0373	40.4295	41.0127	41.8914	42.107	41.239	41.0945	41.0701	41.2258	40.5718	41.1102	41.0863	41.1335	40.8007	41.935	42.8193	43.4614	43.6506	44.5621	45.2033	46.2938	46.6911	47.3888	47.7977	48.7373	48.8639	49.5711	50.2473	50.8183	50.7295	51.1202	52.5362	52.5562	52.675	53.632	53.7822	53.9197	54.137	55.1025	55.0512	55.1733	55.9217	55.7641	56.1706	56.3029	56.633	56.8289	56.3368	57.3333
	39.0311	39.2916	39.8508	40.7645	40.7641	40.9471	40.3459	40.2387	40.0731	39.6956	36.7091	36.4937	36.4414	37.0591	37.7163	39.1319	39.6847	40.5302	41.7059	42.3635	43.6454	44.7051	45.7567	47.2334	48.5049	49.1822	50.8815	52.6264	53.659	54.5022	56.1097	57.2727	58.4674	59.4867	61.2883	62.6744	63.8049	64.9974	66.4581	67.0784	68.3162	69.93	70.7019	71.8339	72.8783	74.0225	73.9022	74.4959	75.9161
	39.9629	40.7162	41.0203	41.8883	42.0307	42.0089	41.6638	41.944	41.7781	41.4035	39.573	39.5032	39.9225	39.7998	41.0515	42.0593	42.1894	43.1756	43.9928	44.6409	46.118	46.7156	47.643	48.7542	49.7893	49.6246	50.9102	51.441	52.8844	52.7918	53.9111	54.9559	55.4619	55.6541	57.1436	57.1156	57.9802	58.3163	59.3657	59.474	59.8563	60.8451	60.7676	60.87	61.4538	62.5216	62.1365	62.0925	62.8284
	31.856	32.0553	33.1652	34.1647	34.6176	33.8155	33.7598	33.517	33.4262	33.1192	31.6973	32.1589	31.4479	32.225	32.9406	33.8131	34.0984	36.2276	36.1303	37.5063	38.2652	38.8061	39.3136	40.4811	41.1015	41.8155	42.4226	42.7148	43.5713	44.2583	44.2597	45.9754	46.4158	46.6944	47.6741	48.3375	48.2402	49.2555	49.7486	50.4329	51.0977	51.9621	51.8609	52.7314	52.9087	54.0562	54.0795	53.8	54.4936
	52.8547	53.4306	54.1839	55.7495	55.5361	55.7011	55.1396	55.02	54.7738	53.7263	54.3407	53.8913	54.0599	54.7741	55.641	57.5999	57.7827	58.901	59.7996	60.9619	62.2166	63.4761	64.4721	65.0953	66.7591	67.4237	68.627	69.7536	70.4323	71.0935	72.1638	73.7547	73.8109	74.623	75.7498	76.7862	77.8589	79.1557	80.957	81.3716	82.7326	84.4163	85.0242	85.9056	86.8492	87.213	87.2863	87.3894	89.1649
	35.8682	36.7641	36.692	37.9467	37.6345	37.3869	37.4871	37.2038	37.0322	36.8906	35.0624	35.3335	35.0087	35.257	36.0744	36.5582	37.0548	37.1641	37.4267	38.0425	39.0135	40.0652	40.3408	41.5761	42.8054	42.6875	43.4332	44.8506	45.1838	45.6286	46.3002	47.5259	48.1497	48.4808	49.6518	50.5364	50.9279	51.4668	52.4778	53.3017	53.3844	54.4338	54.6687	55.2626	55.594	56.2302	56.1699	56.0609	57.0127
	24.2655	24.3941	24.5243	25.3079	25.3874	25.6208	25.1387	25.3042	25.4756	25.0111	25.4315	25.4858	25.4236	26.3583	27.0671	27.9456	28.2363	29.0112	29.6794	29.9849	31.2846	31.7005	32.8046	33.4398	34.241	34.3895	34.8508	35.5951	36.0838	36.4384	36.8468	37.87	37.9653	37.8684	39.1912	39.0653	39.3228	39.9353	40.2835	40.4539	40.2685	41.1413	41.245	41.7226	41.4037	42.3702	42.1125	41.4265	42.2572
[truncated: 14 more rows]
[truncated: 132 more columns]
