# Supplementary material for: Regulation of store-operated Ca2+ entry by IP3 receptors independent of their ability to release Ca2+
Source: eLife journal article supplement (doi:10.7554/elife.80447), 2023-07-19
Supplement: fig1-figsupp1-data1 [file Figure 1- figure supplement 1- data 2.pdf › Figure 1- figure supplement 1 source data/Figure 1- figure supplement 1- data 2.pdf]

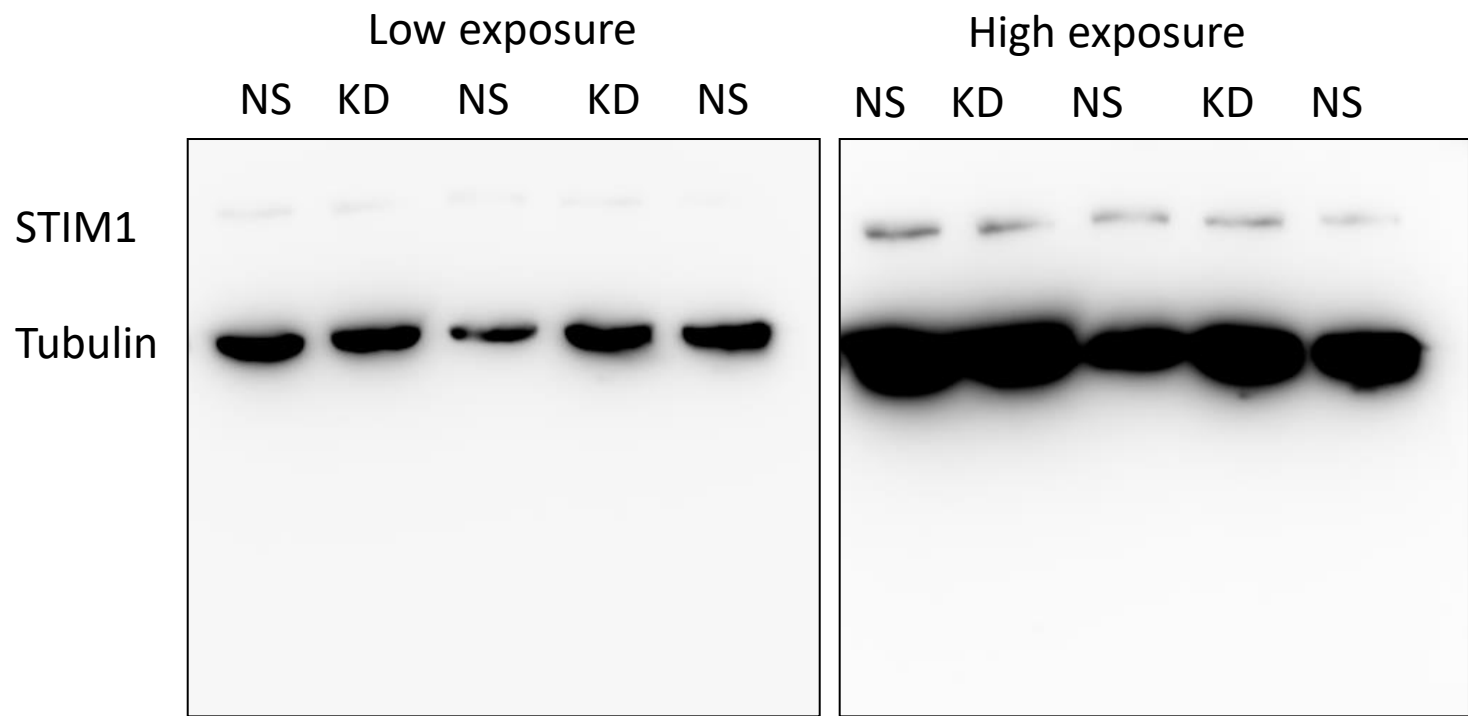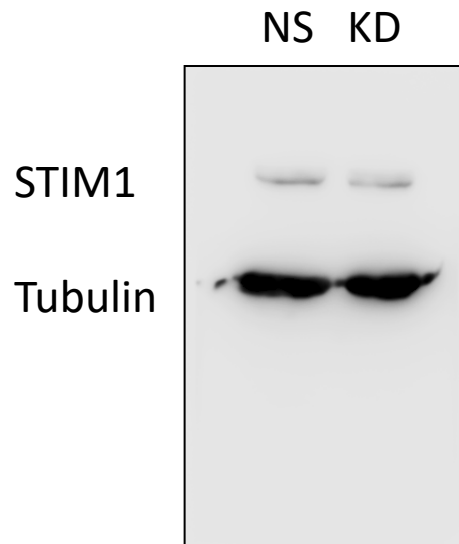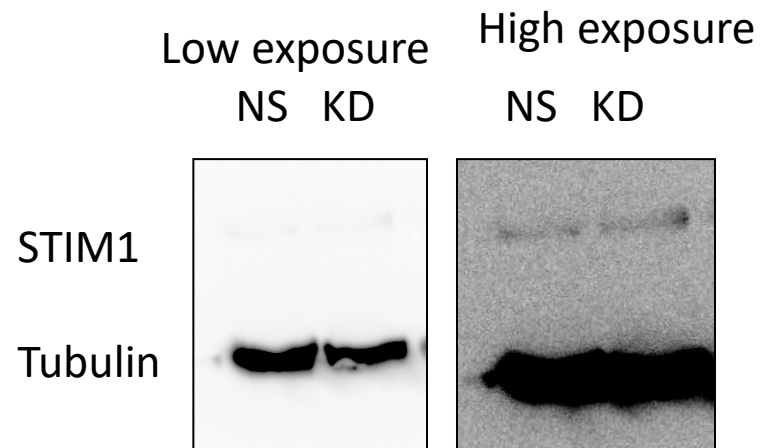

NS- Control shRNA (shRNA NS), KD- IP<sub>3</sub>R1 shRNA

In 1<sup>st</sup> and 3<sup>rd</sup> blot I had to use different exposure time for STIM1 and Tubulin

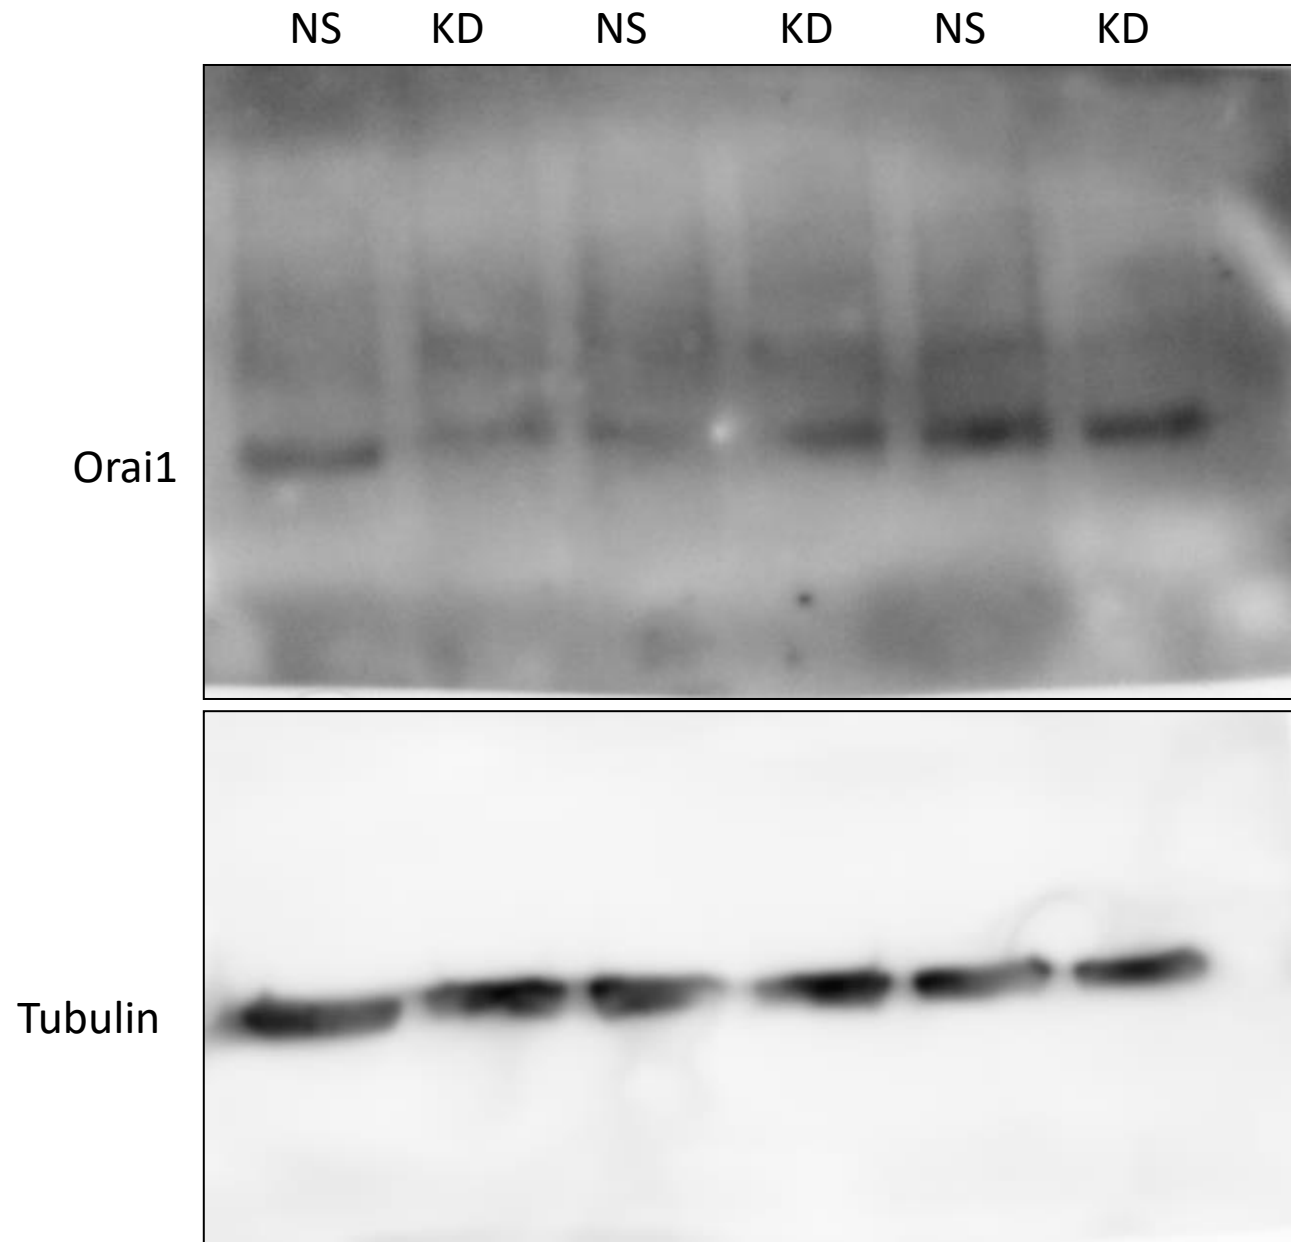

NS- Control shRNA (shRNA NS), KD-IP<sub>3</sub>R1 shRNA, Each NS or KD indicates each biological replicates.
