# Supplementary material for: Regulation of store-operated Ca2+ entry by IP3 receptors independent of their ability to release Ca2+
Source: eLife journal article supplement (doi:10.7554/elife.80447), 2023-07-19
Supplement: fig2-data1 [file Figure 2 source data 1.pdf › Figure 2 source data/Figure 2 source data 1.pdf]

## IP<sub>3</sub>R1 Western blot

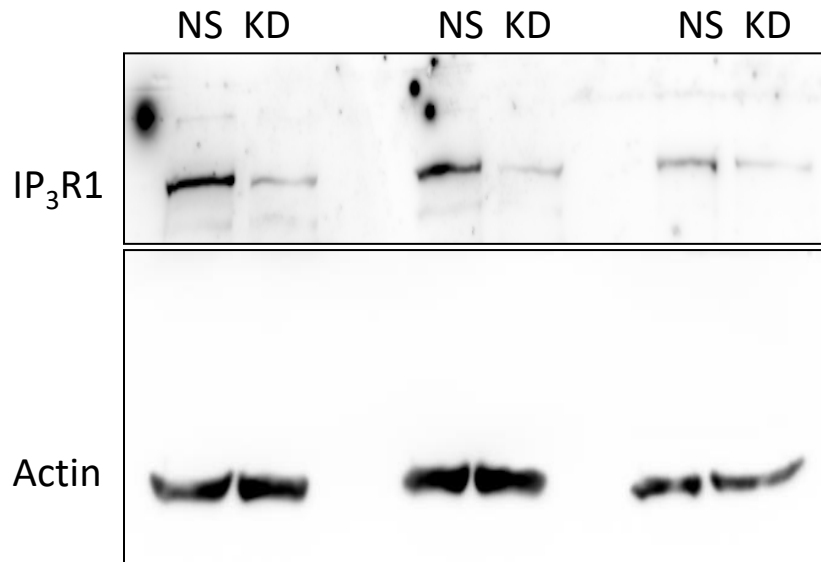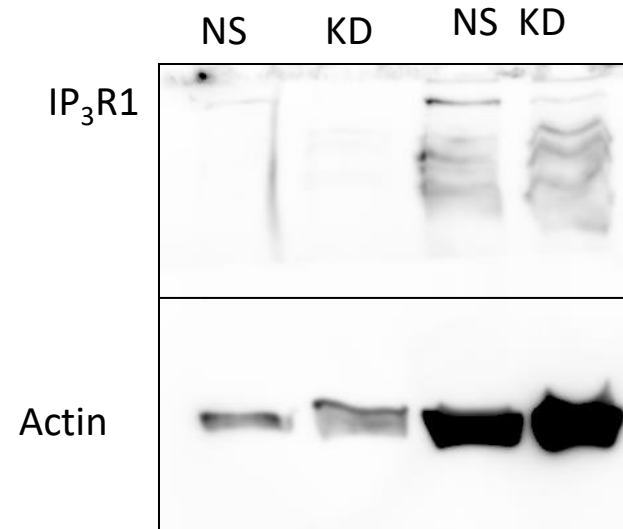

NS- control shRNA (NS shRNA)

KD- IP<sub>3</sub>R1 shRNA

Blots were cut before primary antibody incubation to inhibit cross reactivity.

Every NS and KD indicates individual replicates.

## IP<sub>3</sub>R3 Western blot

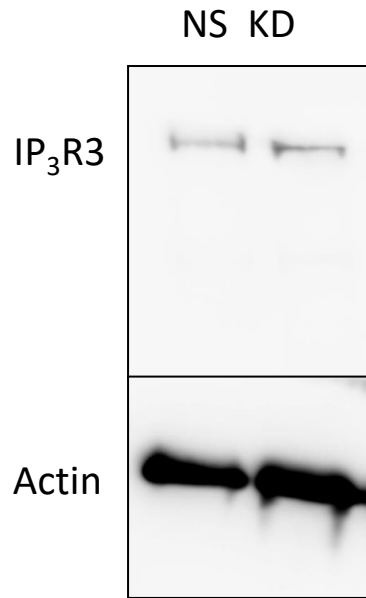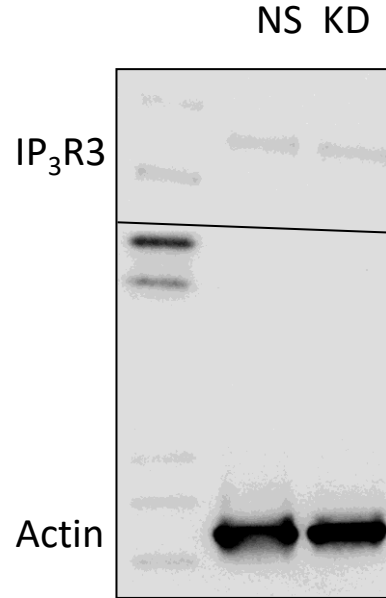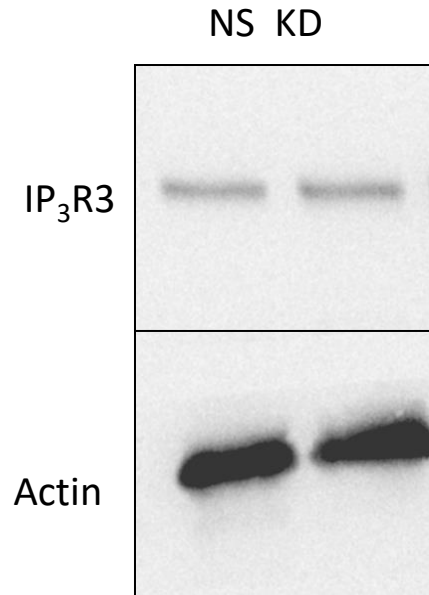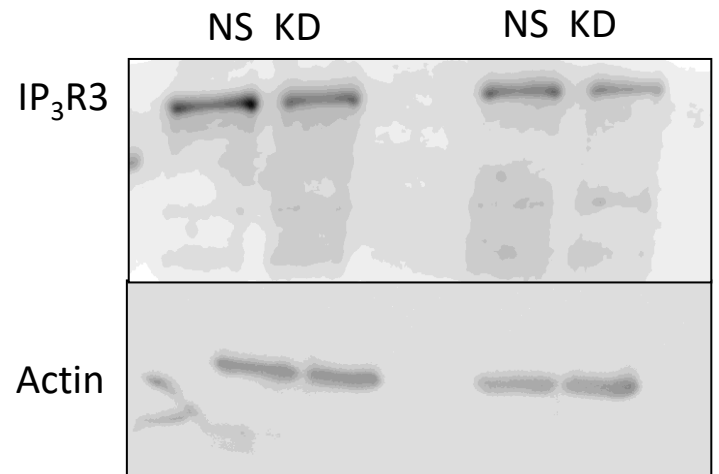

NS- control shRNA (NS shRNA)

KD- IP<sub>3</sub>R1 shRNA

Blots were cut before primary antibody incubation to inhibit cross reactivity.

Every NS and KD indicates individual replicates.
