# Supplementary material for: Regulation of store-operated Ca2+ entry by IP3 receptors independent of their ability to release Ca2+
Source: eLife journal article supplement (doi:10.7554/elife.80447), 2023-07-19
Supplement: fig2-data1 [file Figure 2 Source data 2.xlsx]

## Sheet: Figure2B-2C
NS shRNA	38.1778	38.9943	37.5877	39.1915	39.7652	35.894	38.3145	40.051	37.2823	39.118	35.6278	36.7257	36.1562	33.2666	34.0504	33.2172	32.7154	32.6467	35.8073	32.9319	33.9437	34.1759	33.213	34.0014	50.1123	50.6896	52.3941	52.2103	48.2485	44.1208	47.4038	45.8651	44.6745	42.8895	38.7667	40.1559	37.0483	39.0743	39.1487	38.9456	37.8149	42.2485	42.939	47.318	44.3053	44.5446	48.9476	42.7922	43.2297
	17.8519	17.6252	18.5132	18.5277	17.8848	16.8933	17.0779	17.5595	15.3358	15.4273	13.2437	13.1455	14.3116	12.2007	12.8745	12.1893	10.6016	11.6956	13.1736	10.2438	12.1736	10.5439	10.6268	11.9201	156	138.603	149.243	150.391	133.035	122.063	138.65	122.161	111.345	120.838	107.864	94.1723	76.1575	89.8457	101.639	84.1714	73.6949	76.2918	73.7093	81.5737	66.9542	64.2632	60.1759	56.039	61.2009
	67.5557	67.4744	68.4375	68.7345	67.4481	65.1154	69.746	68.5566	65.9646	68.2307	64.404	65.3295	66.4939	63.6109	64.0459	64.2112	63.2802	63.6208	64.4111	62.5699	65.6849	63.3373	63.4776	67.4563	86.5349	86.0285	85.9153	84.6411	81.5083	79.0494	78.3293	78.4191	77.3742	71.2085	68.9398	71.4613	66.127	66.7398	61.9387	59.761	61.7748	61.6477	61.6364	60.741	60.2774	57.7807	61.8492	56.7098	58.5375
	63.4897	62.414	63.6941	62.6169	63.464	60.3162	63.3514	62.0681	59.9415	60.1034	57.8924	56.9603	55.441	55.3733	54.9578	55.4897	55.7415	55.4164	55.1307	52.5886	54.9154	53.1053	50.8768	51.5529	106.644	105.648	104.209	99.6759	95.6413	91.1549	90.3511	89.3468	85.5041	80.5411	80.0964	80.1338	74.4397	72.414	67.7057	68.6857	67.211	66.6217	64.0845	65.8004	63.1081	61.4412	64.8342	59.58	59.2873
	58.6861	56.8042	55.759	58.554	58.421	54.0311	55.868	57.4032	54.7074	54.2612	52.6357	53.656	53.788	52.915	52.5764	52.8053	51.6018	51.837	53.4976	52.35	53.5446	49.514	50.4777	50.5773	436.042	400.85	372.154	339.161	310.624	279.629	259.302	256.153	241.531	216.41	207.917	205.416	182.429	176.707	156.049	152.437	149.827	142.794	137.58	131.254	125.24	118.497	115.64	109.613	107.338
	35.2833	35.2965	34.5653	35.2675	36.7129	34.8659	34.5012	34.7562	34.8298	34.5596	32.8895	33.2148	32.5334	32.5769	31.5362	31.3052	31.1962	29.5181	31.4349	30.8343	30.7805	28.5371	29.7182	29.4675	227.742	208.349	223.458	219.284	191.877	167.887	159.402	187.236	172.318	139.916	130.834	136.586	137.24	133.008	113.21	106.925	114.531	113.065	100.482	94.948	105.161	103.605	98.3932	85.0622	83.3949
	34.2764	35.0274	34.8458	35.5023	34.0809	32.5893	34.5739	32.6821	34.0202	33.9454	32.3878	30.2443	32.6877	28.9545	30.4171	28.9682	29.7505	29.9669	29.7694	29.7659	27.8293	27.7891	28.1594	27.3567	88.0987	97.0214	118.47	117.948	108.258	94.5254	90.17	93.3745	87.2703	75.7528	68.4616	76.4497	72.6588	71.2011	63.6617	54.0509	54.3298	52.3136	47.8198	48.8168	48.4369	46.2655	47.3948	46.2626	45.2666
	35.9697	34.3974	34.2122	36.7592	36.1255	33.3234	35.8841	36.6789	35.1254	34.4766	31.9288	33.9267	31.4346	31.5352	31.3414	31.4676	30.0688	30.9019	32.8602	28.9677	30.8831	26.8481	28.3705	28.3458	182.461	170.114	160.721	148.589	144.553	153.045	144.855	134.932	121.806	107.453	104.381	107.689	104.286	100.557	87.385	76.4922	74.3191	61.7181	61.4616	63.2872	73.9677	69.632	61.2481	52.0526	51.5406
	39.1714	38.46	38.9071	38.898	39.8672	36.1523	37.8725	39.8484	39.0888	39.2954	36.1975	37.3091	36.9683	34.369	35.5042	35.469	34.6457	34.5576	36.2465	32.4233	35.081	33.4018	34.4305	33.0649	86.885	89.2345	84.3202	79.9197	75.0505	75.4891	69.4321	66.6277	64.1378	58.6485	55.2614	56.5587	53.9033	50.4905	48.0887	42.3194	42.0291	41.7432	40.9797	41.4296	40.7991	39.3226	40.1197	35.5133	36.089
	78.0845	76.5451	77.5414	76.2577	77.5425	74.5097	76.1151	78.3972	75.7129	77.2368	73.1719	74.8631	73.8074	71.8028	72.6248	74.5233	72.1445	73.1828	73.9049	71.7205	72.9671	73.0923	70.6656	72.4048	288.71	253.82	247.968	227.41	224.787	202.694	232.846	202.454	194.567	188.834	203.198	180.828	157.179	147.577	134.028	119.714	132.498	120.353	116.35	105.195	95.2923	94.4113	90.593	86.4575	86.7774
	61.3825	61.0339	60.6315	60.5109	62.8299	58.9032	62.3655	62.3229	60.2009	61.2381	59.2349	59.5718	57.7424	57.9954	57.494	59.0029	57.3777	58.3374	60.227	57.5039	58.258	56.6479	55.5958	54.612	155.334	154.039	138.903	136.109	127.376	121.884	127.291	112.371	112.842	118.817	113.671	111.16	103.675	96.3988	96.2353	86.9196	83.9985	79.3306	74.39	73.7119	65.9784	64.6146	71.6024	66.5896	65.8149
	77.1495	78.43	77.4505	77.2694	78.1607	74.3999	78.4237	78.4604	78.7245	78.724	75.3077	74.9406	74.7088	74.6843	73.9454	75.9199	73.3859	72.8378	74.2285	75.0617	77.6249	75.4501	74.7484	74.7688	142.926	144.879	144.248	145.876	138.728	131.247	132.441	126.294	122.575	117.708	105.891	108.479	102.809	106.476	101.903	95.5846	98.5734	95.5526	93.6351	95.7575	87.2593	85.8964	87.1146	80.9208	80.6143
	89.401	87.9252	87.3805	89.1034	89.8603	89.5879	88.9319	87.802	89.0945	91.3859	85.9651	86.3165	87.4384	84.8576	88.2087	86.9117	84.9569	84.7716	87.2213	84.1004	86.5077	85.4235	85.0723	87.2708	306.581	304.028	284.617	297.473	277.417	258.752	232.614	243.055	233.416	204.226	198.746	200.417	191.384	178.404	176.936	162.812	191.902	163.604	158.714	148.27	135.282	127.718	132.661	134.927	114.387
	51.5014	50.6307	51.8042	51.5602	53.6727	50.1189	50.4628	51.1679	49.4751	50.3777	48.4568	49.0861	48.1565	46.3073	46.0657	54.5326	43.6841	45.9812	46.1566	44.0189	45.5134	44.2535	45.1199	44.7852	524.242	485.994	452.132	409.8	377.677	349.081	324.26	311.035	286.317	261.718	249.707	247.408	220.467	204.496	186.191	183.572	178.111	168.865	159.028	157.833	140.822	133.908	134.25	121.265	114.5
	42.3044	42.5263	42.1554	42.0422	42.1967	39.8983	40.8924	42.7628	39.851	41.7141	38.1304	39.4011	38.4377	37.3841	37.4014	36.231	38.092	36.8474	38.1483	36.7906	38.438	36.8343	36.5737	36.8934	339.156	333.425	320.227	306.818	289.752	270.144	241.175	245.198	257.664	237.153	232.804	216.086	203.139	206.818	212.066	208.78	209.887	192.15	179.808	199.088	198.879	171.327	170.14	179.808	183.921
	38.0531	38.466	37.7774	37.9428	38.3585	35.176	39.7756	37.9857	37.3503	36.0152	34.3043	35.529	35.1372	33.1633	34.2551	33.6263	33.2376	32.4015	33.5641	33.0157	33.0335	30.9767	31.9901	31.0103	67.1047	65.5096	64.8654	64.159	61.9847	57.7456	57.8681	57.0314	56.4789	53.1235	49.9392	50.3771	46.9746	47.2791	44.7666	41.8852	44.6478	43.9221	41.878	45.2141	40.2205	38.5292	42.1315	37.9983	40.5448
	53.4777	53.4258	52.8754	53.306	53.9619	51.8499	55.0066	51.4357	53.3405	53.1903	50.4781	49.1539	49.8492	47.5593	48.365	48.7116	47.2069	47.6441	49.0611	47.2267	48.5686	47.8164	48.5067	46.6618	219.521	233.458	239.99	223.297	220.477	204.839	208.139	191.905	187.743	183.836	170.125	155.654	142.403	142.752	144.066	137.078	129.5	130.053	119.411	118.372	106.488	108.923	101.657	97.1755	109.05
	55.1558	55.4925	56.1486	55.3194	56.0454	52.7705	54.787	56.229	54.7122	55.1009	51.9567	53.7677	52.8201	51.9571	52.0518	52.9092	50.7462	50.2407	51.7752	50.5678	52.0393	50.6813	50.2733	50.6659	136.605	130.356	122.356	117.004	110.151	100.866	98.6238	100.485	96.3874	90.451	85.6342	86.0076	82.2271	80.3265	79.6924	75.3472	77.2564	75.6016	78.1561	77.379	73.1979	69.6531	71.5842	66.0192	65.1888
	53.1932	53.5977	53.9832	54.7936	56.279	53.0817	53.0409	52.7924	51.7561	53.1825	49.7944	50.861	50.3271	48.043	47.3615	49.8964	48.7542	49.2866	50.0513	47.7781	51.2406	49.7316	49.7974	49.369	195.769	189.446	187.421	207.874	168.994	169.256	183.744	155.532	130.672	131.875	139.888	124.761	115.322	100.278	110.711	98.7025	120.37	109.082	95.5945	91.6499	83.2117	83.0371	93.7451	85.0634	74.6223
	89.4034	90.1556	90.9765	91.192	91.2731	88.2091	92.9704	90.2824	89.1651	89.4125	83.6706	86.2225	84.0157	83.6219	84.4643	85.7148	84.0486	83.653	83.6985	82.742	83.2312	83.1044	81.15	82.0535	503.214	475.846	478.628	440.065	385.545	369.885	319.309	318.073	288.763	249.947	244.676	248.641	223.7	207.443	200.577	183.829	171.806	177.164	165.62	164.785	160.265	143.071	141.166	138.642	135.865
	87.1293	84.2318	86.3347	89.4986	85.2086	85.2455	86.7879	86.3535	85.4669	87.0076	83.9578	84.6537	83.437	82.3358	85.1514	85.9147	82.3686	83.7857	86.0455	82.4251	83.5782	81.0445	82.8432	82.7275	210.545	252.844	252.486	249.308	245.819	253.704	230.556	227.632	223.957	214.26	210.223	201.22	169.816	174.047	158.115	176.228	168.437	139.464	144.883	153.828	130.132	125.59	123.438	120.047	134.622
	120.096	118.485	122.567	121.251	119.328	117.99	123.373	121.442	117.611	120.629	117.759	117.515	118.26	115.659	118.008	118.432	115.722	116.74	121.329	114.131	117.16	116.32	116.917	116.908	423.625	485.279	448.234	420.653	401.789	366.97	343.057	328.719	336.644	277.024	261.562	259.877	262.656	238.265	229.444	212.951	218.343	222.332	206.42	199.776	195.548	183.329	176.691	178.628	173.986
	59.3703	59.5383	59.0049	59.9555	58.8857	56.376	59.3892	58.3775	57.1955	57.1855	56.0841	57.0129	55.2967	54.9155	55.1938	53.0818	53.9523	52.753	54.9694	52.3056	54.9549	52.1251	52.5195	51.2979	647.981	532.502	470.461	461.023	450.188	420.75	382.091	354.312	319.069	294.501	285.56	278.841	249.64	243.504	235.645	230.216	217.886	216.731	210.77	207.094	194.854	191.524	187.616	169.248	164.464
	16.1051	18.8695	19.8811	22.6297	22.9505	20.9002	21.2083	22.5797	22.1509	21.7702	21.3779	20.5224	19.9685	19.6418	19.4437	18.6651	17.8831	17.4118	16.6756	15.8081	15.461	15.6221	15.2457	119.166	108.949	105.864	108.721	104.171	99.1194	97.6507	95.8978	95.2048	92.6747	90.3219	88.4616	85.6744	82.6361	82.0848	81.1518	80.3266	76.8784	74.2109	71.4938	71.0564	69.0026	65.8654	63.9763	64.8009	63.7095
	12.6849	15.3962	16.3882	19.2065	19.7821	17.2665	17.6991	19.8539	19.1595	19.0704	18.0917	18.0889	17.6857	17.2786	16.8678	16.791	15.8599	15.4872	14.8521	14.3243	14.2725	14.5635	14.4634	76.5133	125.924	118.022	117.692	120.558	117.238	113.992	112.453	108.522	106.539	102.505	97.9546	100.479	93.5021	93.0184	89.0519	87.4239	83.9738	80.1402	75.2895	76.1991	74.9836	73.3618	67.7437	65.7152	63.675
	28.7908	32.1343	33.5573	35.9252	35.8679	33.6484	34.0976	36.221	35.4962	35.0621	34.696	34.778	33.72	33.0467	33.2724	32.8051	31.3623	31.4905	30.2864	29.5039	28.9951	28.0561	29.5125	46.8625	53.4535	55.721	56.0963	55.5868	55.0614	53.5917	52.9988	52.6167	52.7303	51.932	51.6028	50.7825	50.0117	50.5253	49.8986	50.2194	49.3556	47.6993	46.3354	46.961	44.9865	44.0975	43.8549	42.9598	43.1596
	31.7896	34.8565	36.6315	38.6052	38.9209	36.9699	36.255	38.8185	38.3993	38.8054	38.2309	38.8761	37.161	36.2508	36.6691	36.1012	34.7938	34.1511	33.5908	32.8344	33.3993	33.3889	32.8268	46.5976	51.9912	54.8489	55.1029	53.9852	53.2585	52.941	53.1393	51.5601	52.091	52.237	52.4313	52.8412	52.0626	52.6313	52.5794	52.2294	51.7522	51.0502	50.0242	50.2237	48.3063	47.5113	47.1417	46.5299	45.7441
	35.1568	38.1385	39.6129	42.6278	42.3162	40.1637	39.6618	42.2171	41.3782	41.7135	40.4712	39.0828	38.8844	38.9874	38.0308	37.7929	37.1853	36.3649	35.7973	34.7637	34.8756	35.4921	35.2208	108.154	106.808	109.111	110.367	110.443	108.851	107.883	105.218	103.001	100.693	101.097	99.4694	97.9825	95.899	95.7537	93.6649	92.6496	91.3111	88.2921	85.0155	83.6796	81.6073	81.2747	78.9329	78.1428	76.3233
	26.3348	29.3585	31.5633	34.4775	34.3281	32.1938	32.0694	34.2431	34.2172	33.5145	33.0188	32.8919	32.1224	32.3301	31.5901	31.6287	31.3658	30.0141	29.8785	29.5994	29.7222	28.8512	28.8201	122.686	119.956	122.265	125.083	124.05	120.336	117.145	113.978	114.128	108.829	109.074	105.485	104.188	99.4453	99.0349	96.2978	95.3364	90.5847	88.4508	85.6838	83.1253	80.9299	79.484	77.5542	75.0596	73.2859
	16.3477	18.353	20.2555	22.8517	23.4112	20.5212	21.7809	23.4596	22.3178	22.3963	22.2067	21.7342	20.808	20.6445	20.5901	20.5856	18.8211	18.9095	18.2077	17.6527	17.5165	18.2943	17.9395	112.027	155.885	189.745	183.169	172.149	167.832	165.45	166.66	159.634	147.962	145.067	147.61	137.646	131.861	131.878	129.346	123.543	121.507	115.525	110.468	110.989	108.36	106.119	100.579	97.1036	93.7837
	18.4765	20.628	22.4817	24.8216	25.5113	23.3824	23.5524	24.9165	25.4995	24.8601	24.4035	23.8772	23.3804	23.3029	22.946	22.1145	21.6405	21.4193	20.8299	19.7989	19.6652	20.1555	19.881	50.1867	63.0269	95.1295	124.608	120.718	111.227	106.245	110.677	110.194	104.039	108.816	103.782	96.7511	97.4329	100.263	93.9587	86.9802	83.8796	85.3852	84.1152	81.0705	77.1945	73.7781	68.8731	63.7728	61.3524
	17.3394	20.8038	22.0935	24.4481	25.4615	22.2857	23.0689	24.997	24.8125	24.835	24.5367	24.6079	23.276	23.8175	22.6692	22.7917	22.1109	21.5578	21.3627	20.5726	20.7165	20.4969	20.953	72.5601	87.4681	96.1946	97.059	91.6602	86.932	84.886	85.4934	85.1738	82.5713	82.183	81.2196	76.812	75.6894	76.0485	73.4504	71.1519	70.5676	69.3408	66.3481	65.945	64.8421	61.666	60.3706	58.0147	57.2365
	18.4276	20.5709	22.1066	25.6947	25.7634	23.3763	23.7927	25.6097	25.3186	24.7694	24.1952	24.164	23.1597	23.9668	23.3648	23.1151	22.3294	21.6775	20.8414	19.7878	19.7841	20.2594	20.3484	114.349	148.604	172.217	161.396	145.712	136.637	140.674	147.615	140.456	130.371	124.924	129.878	123.565	114.768	117.919	113.484	109.919	107.173	102.981	100.171	100.468	96.9244	94.1093	98.5774	87.4333	88.156
	6.73727	3.27644	3.12713	2.67758	2.515	2.4926	2.56966	1.40686	3.32224	3.65868	3.3651	3.1117	3.83829	3.75521	4.3499	4.21287	4.23087	4.44456	4.36736	4.71088	4.29273	4.46888	4.6604	4.64217	37.3182	41.1673	42.9291	43.0938	43.4499	42.8505	42.0902	41.0772	40.5613	39.0742	38.7071	38.5103	37.9334	36.5882	34.8347	33.4597	32.7686	31.4089	30.1847	28.9267	28.2914	26.4355	25.5587	24.8952	24.3933
	6.91178	3.33565	2.96902	2.29077	2.42757	2.53437	2.5102	1.12101	3.07653	3.18356	2.94506	2.82217	3.33114	3.27841	4.1875	4.00277	3.86505	4.1956	4.1434	3.87613	4.59922	4.58375	4.54541	4.00837	71.6869	88.8604	96.6858	93.8535	95.3661	94.5281	93.5244	91.9291	89.9144	85.7851	84.8103	82.4213	79.2412	76.8416	73.3024	68.91	66.6555	62.5341	60.2487	56.73	53.5435	50.9663	48.68	46.1206	44.7896
	13.5161	8.74949	8.49145	8.29459	7.59985	7.5967	7.90442	5.72676	7.71169	8.11955	7.82483	7.91076	8.11434	8.3538	8.44503	8.68578	8.69501	8.79393	8.50705	8.24819	9.20095	9.16792	9.23849	8.97999	429.142	500.516	470.552	440.18	421.889	384.222	351.525	328.424	300.719	276.346	254.684	238.265	223.501	208.617	192.93	182.478	173.419	162.455	151.648	145.084	136.983	131.5	124.74	118.307	112.638
	13.9185	10.3343	8.71983	8.19469	8.66469	8.07097	8.79279	6.83197	8.99025	9.01613	8.27733	8.12063	8.75961	9.05735	9.17146	9.48717	9.1487	9.57047	9.09758	9.56951	9.35701	9.00242	9.1792	9.08097	169.272	155.963	134.546	124.859	136.436	140.026	132.097	136.054	138.683	131.423	129.007	126.823	120.152	118.84	113.4	110.441	109.005	106.558	101.468	98.1815	100.182	97.2815	92.0574	89.7308	85.7959
	17.0978	12.901	11.7275	10.9198	11.0811	12.2867	11.6714	10.1469	12.5304	11.9267	11.6073	11.5577	11.8622	12.6967	13.1128	13.1964	12.7554	13.8684	13.195	12.5695	12.6592	13.0355	13.2089	12.1272	129.593	134.405	115.221	120.164	126.958	122.264	116.198	118.304	118.534	113.025	117.473	110.556	108.77	102.475	105.621	104.731	101.583	94.1519	90.4661	82.5999	96.5052	87.5302	79.5594	78.4407	79.4947
	22.5761	19.7948	18.6753	18.6595	18.3676	17.987	18.626	17.2817	18.9162	19.0448	18.7799	19.1075	19.1832	19.1899	19.4646	20.1008	19.7923	20.5948	19.6468	19.2433	20.3568	20.6945	21.1164	20.8381	100.048	99.5566	96.2627	98.6548	96.8913	100.839	99.2833	98.9569	99.6571	96.638	98.2431	95.0741	91.1929	94.6172	93.6316	90.717	84.0479	87.2761	83.6704	81.2281	75.4243	72.7938	70.7052	70.0136	75.8483
	14.4122	10.4919	10.3135	9.77338	9.95049	10.1198	10.4898	8.85953	10.353	11.1347	10.478	11.2213	11.3872	11.8858	12.4895	12.0758	12.1493	12.8594	12.5739	12.6085	11.7784	12.6324	12.6645	12.9058	127.921	154.726	145.253	148.651	157.219	141.897	139.595	142.122	137.914	134.035	131.645	127.478	122.849	119.488	114.758	111.361	108.324	101.667	104.126	99.6264	100.469	92.0934	86.959	84.6937	84.3734
	20.4587	15.9169	15.4658	14.226	14.532	15.048	15.6619	13.2196	14.7493	15.8398	15.5705	15.7572	16.4956	16.5158	17.0796	17.1203	16.2781	16.8893	15.6994	17.0322	16.8263	16.7502	17.7505	18.0181	56.7555	128.164	124.304	116.857	114.841	110.959	112.47	111.783	107.303	102.893	98.2454	95.1981	92.2515	88.5856	84.9786	81.5847	77.9067	76.0233	74.5355	71.4134	69.8969	65.841	64.7841	60.4307	59.4352
	24.2362	19.7772	18.5709	18.3907	18.1559	18.6925	18.5171	17.5099	19.2825	18.9841	18.4677	19.0316	18.8127	18.7785	20.0128	18.9439	19.6788	20.0311	19.8815	19.6356	19.3541	20.2687	20.762	20.1274	84.5483	126.052	138.939	152.619	150.843	150.788	150.017	143.819	150.809	139.349	139.752	143.207	134.207	126.911	128.121	118.699	117.18	114.88	113.149	109.255	103.264	101.931	98.8037	96.3746	90.1429
	25.8735	20.0874	19.8067	20.3906	20.0046	20.3141	19.8208	18.252	21.6641	20.7128	20.3507	20.6586	20.7159	20.7204	21.2222	21.1315	20.8908	21.4888	21.1275	21.4229	21.0236	21.9427	21.8399	21.8944	227.33	264.951	242.006	206.847	189.914	199.025	201.893	195.968	189.663	173.519	159.399	150.61	146.808	142.244	133.323	131.532	125.191	121.121	115.644	112.627	105.94	102.483	98.202	96.2044	93.0966
	28.0055	26.1109	25.4954	25.3359	25.6315	24.9019	24.1145	24.3881	24.7938	24.7761	24.0362	24.3426	23.8261	24.3151	24.2495	24.0201	23.8501	22.999	21.8568	22.3903	25.8375	23.3865	23.7666	23.1057	158.94	169.883	165.052	161.918	156.857	152.736	151.825	148.669	147.817	148.716	149.3	146.795	143.654	139.498	133.454	130.484	127.477	122.605	117.034	114.807	113.329	110.963	106.201	104.342	101.832
	30.6554	28.6373	27.8386	27.5968	27.8839	27.3487	27.2484	27.1901	27.4385	27.4312	26.3892	26.1149	25.8217	25.9907	25.7239	25.1696	25.036	24.2682	22.9041	23.4674	28.2884	25.373	25.5725	24.7453	127.537	116.056	101.051	86.7545	75.543	67.7982	63.2194	60.9738	61.3479	67.5545	83.357	83.8737	77.4173	73.1625	70.2181	69.8734	73.8996	73.775	70.8991	72.2263	72.4108	68.9861	65.948	70.6901	75.8654
	31.735	29.8513	29.2309	29.1806	29.0249	28.6331	28.2993	28.2556	28.4889	28.3437	27.8345	27.4421	26.968	27.232	27.3655	26.8255	26.8032	25.5239	24.51	24.8012	29.389	26.518	26.6369	25.8403	31.4335	32.1437	32.5387	32.8368	33.8177	34.8689	36.6341	37.8357	37.9658	39.5958	41.4	42.367	43.1244	44.4692	44.0851	45.2816	47.1478	48.244	47.9492	48.7414	50.4147	50.8101	50.8563	51.547	51.2047
	28.2038	26.3909	25.6294	24.9484	25.4103	25.0868	24.8423	24.8779	25.1581	25.3462	24.1514	23.913	23.3566	23.7547	23.5391	23.5984	23.3141	22.9501	21.1659	21.7856	26.5296	23.4868	23.6844	23.094	399.493	283.517	203.487	152.685	120.894	99.7506	87.6082	78.8607	76.749	80.7238	102.143	130.184	134.614	126.965	115.229	116.054	118.3	122.546	127.787	131.043	125.028	119.265	112.353	115.626	122.856
	38.0975	36.0922	35.4677	35.0324	35.3527	34.8964	34.1093	34.1551	35.0961	34.8286	34.1759	34.0837	33.5841	34.464	33.7389	33.4205	33.2996	32.4961	30.922	31.3539	35.4523	32.2208	32.6502	31.7972	160.955	139.742	117.962	99.781	86.7982	89.7024	102.197	110.127	109.049	106.508	104.564	102.269	99.6403	101.521	103.932	97.6079	96.2152	104.254	94.5815	95.3059	101.467	94.003	87.0963	96.6592	97.3707
	35.3913	33.6111	33.3289	33.0216	33.5711	32.4969	32.2032	32.065	32.5181	32.0882	31.8089	31.8547	31.5484	31.7139	31.4408	31.179	30.442	29.581	28.0643	28.9347	32.8873	29.9913	30.5674	29.3474	108.163	100.013	86.4403	74.9557	75.181	86.2445	85.3609	82.0828	80.2715	83.9762	85.3001	82.0586	82.4653	84.0146	80.2353	83.4424	76.9473	78.8278	74.2703	78.6421	78.6463	78.7146	77.8264	76.1065	74.7801
	33.0163	31.5001	31.1065	30.9222	30.8419	30.5063	30.6828	30.4752	30.4479	31.01	30.5987	29.9496	29.6784	29.7524	30.11	29.611	29.1674	28.1162	26.8544	27.279	31.3813	28.7917	28.757	27.6145	80.8954	142.488	113.796	93.0281	88.4559	96.7734	105.887	102.857	97.5565	96.1095	97.0638	91.7055	92.5085	91.4591	86.5518	82.4963	80.875	76.9747	73.8201	73.5018	73.8106	73.6272	75.3064	74.8413	75.6479
	35.5117	33.2493	32.5858	32.1118	32.5002	31.8181	31.325	31.2934	31.262	31.3752	31.1845	30.3564	30.0834	30.7175	30.1568	30.0693	29.8416	28.676	27.976	28.8421	32.0852	29.4858	29.5972	28.6475	61.4951	112.389	128.527	123.402	120.169	116.62	115.372	114.194	112.165	113.569	112.109	109.381	104.95	101.817	97.8207	95.2877	94.3572	92.1602	90.6287	89.1155	87.0223	86.093	84.4982	83.2444	81.0204
	58.5573	57.1668	57.4422	56.8666	56.5462	55.969	56.0651	55.3461	56.2977	55.4292	55.5018	55.8246	55.4067	55.9687	54.8023	55.4921	54.6656	53.8373	52.3854	52.2837	56.1687	53.6707	53.9277	53.0933	127.855	118.467	107.068	109.49	109.913	110.535	110.23	110.857	109.898	110.596	111.707	109.5	106.581	102.951	104.725	103.025	102.947	101.12	102.023	100.307	103.243	100.235	99.2313	100.186	99.0654
	39.8512	38.0464	37.9344	37.0149	37.8596	36.8851	36.7696	36.5787	36.9869	37.1994	36.6907	36.653	36.3733	36.5755	36.3528	35.9187	36.1187	34.351	32.904	33.5295	37.5735	34.8673	34.7942	34.444	114.525	104.154	89.8608	79.8389	83.0285	88.2532	88.4598	88.9958	89.3853	88.2365	88.3892	85.9591	89.4171	84.4097	82.3189	84.2275	83.3268	84.8481	77.8383	80.0599	81.4603	79.6187	80.2519	80.127	81.7122
	51.745	47.4316	48.4022	49.0022	48.7374	48.7807	50.1838	49.6883	49.0031	48.3636	48.5605	48.7965	47.686	47.3708	48.004	47.6385	47.3329	48.3921	47.921	48.5143	48.7996	48.5853	47.8015	47.9282	108.733	110.325	110.304	109.577	106.864	109.44	108.266	108.707	108.243	106.553	107.128	108.566	106.665	107.251	107.668	108.313	109.715	107.31	105.565	106.398	103.669	103.524	104.017	100.352	98.287
	59.6516	53.7505	54.2565	54.7107	55.1534	54.5765	55.7252	54.9945	54.5917	54.2453	53.8418	53.8596	52.8083	52.3361	53.0329	52.851	53.3534	53.5632	53.5838	53.8376	54.0406	54.0413	54.0267	53.8798	63.2587	64.142	64.4214	64.7144	65.0962	66.6722	68.4264	70.8145	71.3407	72.0888	73.1781	74.7684	74.9727	75.6191	74.6807	73.7226	74.2183	73.6457	73.8736	74.708	74.3965	74.298	75.2792	73.9804	73.0896
	24.019	21.4534	21.762	22.2606	21.6797	21.6792	23.2116	21.9521	22.0714	20.8418	20.7141	21.5484	20.7128	20.0259	20.2628	20.3964	20.3317	21.1325	21.4848	21.2383	21.8905	21.6231	20.9746	20.7941	45.3735	50.4311	61.6052	70.7224	70.9031	71.6928	70.6083	68.2839	66.3748	64.8471	63.7264	62.5357	60.159	58.9685	55.4036	53.3761	52.5673	50.8271	49.693	49.5979	47.8638	46.5456	46.8035	46.9743	45.6519
	41.073	42.4426	43.1149	43.9532	43.3475	43.2546	44.5721	43.5774	43.0894	42.5052	41.6795	42.6353	41.9925	41.2251	42.3331	41.4165	41.9548	42.5136	41.6749	42.6064	43.5842	43.5707	43.0938	42.9649	62.0432	98.1095	111.389	114.754	115.663	112.913	113.611	113.452	107.526	106.278	103.947	104.543	99.7376	97.71	93.6836	89.8835	89.4271	87.104	85.0535	82.9878	80.8669	79.9627	78.3875	76.3028	75.2487
	7.72324	3.965	2.73897	2.62107	1.58992	1.99234	2.9047	2.80752	2.60371	2.94616	2.1699	1.41732	1.54452	2.17029	2.87993	2.54367	4.23094	3.73073	3.69364	4.19962	4.08234	4.26725	4.5088	4.51584	110.42	101.422	93.929	87.38	83.7852	80.7234	76.8408	74.9905	72.0462	71.5144	68.4784	64.4152	63.4842	60.2327	58.4157	55.4438	54.192	52.3683	49.9573	47.6232	47.3182	46.5388	45.9854	43.24	41.8229
	31.4014	27.1824	26.1785	25.0286	23.7846	24.0742	25.2269	24.7509	24.2654	24.6015	24.6208	24.2127	23.8448	25.2926	25.4149	24.8782	26.3786	26.1345	26.9121	27.3512	27.2786	26.8381	27.2969	27.5343	94.402	87.4431	81.6264	74.7051	69.0705	68.1939	71.9953	77.0552	74.831	73.5118	71.6254	70.2568	71.5771	71.4245	73.1658	69.473	69.0609	69.9616	68.2467	67.7317	67.3953	67.346	68.7769	63.9117	65.761
	16.5778	12.3833	11.7522	10.4588	10.1793	10.0456	11.1534	10.8781	10.9001	10.8119	10.6913	11.3436	10.8233	11.177	10.8691	11.0214	11.8036	12.3618	12.6527	13.3939	12.2403	11.8801	12.8238	12.5834	69.3494	61.2964	60.1044	61.8281	61.3135	55.8127	53.7797	53.1243	51.5444	50.5383	49.6611	46.8445	45.512	43.2161	42.9754	41.8491	40.3393	40.614	39.8424	39.3168	38.7852	38.9521	40.0987	36.7741	36.4773
	29.7859	25.6582	24.2442	24.4087	23.4933	23.2994	24.2064	23.6643	23.0409	23.7018	23.8943	23.2899	22.6675	23.2838	22.9009	22.89	23.7678	24.0501	24.9011	24.9081	25.0821	25.0499	25.5777	25.6174	60.0196	52.5509	50.3063	53.3145	62.1641	57.1615	53.9669	52.5935	54.1873	55.7661	58.4769	58.2119	55.3091	52.7313	52.9892	52.5172	52.1464	52.5667	52.7288	52.4098	51.8345	51.7707	54.6626	52.2626	53.3109
	47.4605	43.7825	41.6968	40.7566	39.3791	39.2	40.9698	39.2764	39.7527	38.4058	38.2629	39.1405	37.9451	38.4429	38.159	38.5369	38.9268	38.275	39.7717	38.783	39.9409	39.3452	38.928	39.3958	272.261	246.522	220.05	203.315	192.863	182.667	175.067	169.809	163.197	160.926	154.288	147.48	142.607	137.194	135.443	131.731	125.397	124.571	116.082	113.405	109.585	107.744	104.13	101.21	95.6294
	62.3543	58.1354	55.9124	55.2132	53.5733	53.6244	54.6097	53.923	53.463	52.7385	52.7647	52.393	51.1179	52.259	51.0515	50.9879	51.8395	50.9979	51.305	51.7809	52.0848	52.4844	52.3985	53.3023	316.126	248.479	204.235	175.99	160.306	155.258	150.874	154.407	152.418	153.193	150.059	146.315	146.692	141.816	144.14	143.008	136.959	134.272	129.705	124.051	120.233	121.115	120.178	116.938	113.741
	55.6473	50.8303	49.4562	48.923	47.2013	47.7015	48.6102	47.1286	47.5442	47.9559	46.6079	46.877	46.2893	46.6288	46.4924	46.1276	48.3765	47.9029	48.2174	48.3623	49.2618	49.1829	48.8507	48.6444	66.9483	64.7041	64.2942	64.5253	66.7387	69.1762	70.6694	70.6505	70.5986	73.4637	73.4437	72.5015	74.6658	74.7664	77.0216	77.8017	78.487	79.1287	80.3152	79.1311	79.4656	80.8042	82.1949	81.1007	80.9486
	29.6465	25.2757	23.1013	22.9944	20.9503	21.2448	22.9797	21.4461	20.3899	20.3733	19.1412	18.6847	17.7459	19.2801	18.3349	18.1134	18.7242	19.1081	18.9889	20.0045	20.3695	21.2967	21.0184	21.955	506.928	362.947	268.284	210.085	183.018	171.361	171.342	182.49	187.06	193.755	190.798	180.714	181.233	165.845	163.296	154.285	145.511	138.665	127.688	123.229	119.311	114.629	113.203	110.69	107.65
	7.97952	3.3559	1.96652	1.37559	-0.517259	-1.23067	0.145178	-0.957734	-0.869397	-1.43294	-1.9928	-2.17484	-3.19339	-2.25945	-2.77163	-2.87696	-1.54438	-2.05555	-0.68426	-1.17608	-1.33253	-0.907971	-0.0561848	-0.373378	355.946	264.253	204.062	162.087	135.201	115.11	99.0163	88.7312	79.2092	73.24	67.7138	62.2931	58.5723	54.9366	54.6017	53.4744	52.3037	50.6703	49.9189	48.6174	48.73	48.2166	49.5269	47.4305	46.7876
	28.2876	22.6969	21.1413	20.1714	18.9166	18.4876	20.3004	18.6203	17.4975	17.7779	17.6156	17.01	16.1346	17.0003	16.1026	16.2962	18.3125	17.3005	17.8908	18.3658	19.1964	19.39	19.655	19.5319	331.017	261.156	213.032	177.81	158.505	143.504	130.458	119.737	114.101	108.084	103.563	97.1817	94.271	90.2245	90.4062	89.3946	88.3713	86.8598	85.3786	83.7087	84.0966	82.9187	84.7195	81.7811	80.9471
	35.7225	30.3198	28.9356	28.6447	27.9728	27.5176	29.3771	28.6662	28.0838	28.5217	28.5101	28.4391	27.8738	28.9996	28.8286	28.2034	29.7536	29.3058	29.2462	29.6651	29.6474	28.9235	29.4905	29.6422	68.2807	63.7979	61.8623	59.7915	59.6847	59.824	60.6759	62.8359	62.9503	64.5277	65.1607	64.4996	63.9787	63.6319	65.4363	65.4443	64.4663	64.5691	66.2129	65.847	66.2196	65.8357	67.6627	65.7672	66.1272
	27.3234	23.2554	21.0389	20.519	18.583	18.5646	21.0618	19.4303	18.3548	18.3344	18.3678	18.6305	17.0341	18.5968	18.4203	17.2259	19.4726	18.324	19.297	19.0178	19.5597	18.998	20.0325	20.1248	37.4144	39.0328	40.5055	42.6903	46.7389	49.631	51.3363	53.0385	52.0203	55.2653	55.4108	55.256	56.3975	55.2485	58.1241	58.019	58.3032	59.5999	59.2763	59.2924	59.447	59.4943	63.4139	62.3684	61.8354
	23.0866	18.3113	16.2229	15.4869	14.4571	12.6	14.4126	13.2991	13.5242	13.3052	12.8578	12.7822	12.4019	12.8437	11.452	12.3137	13.8202	13.4604	14.5237	14.7799	15.1363	15.0638	15.5779	15.5313	39.3782	41.8868	48.5952	57.2373	65.0228	67.6252	71.2816	73.3934	69.7065	72.3424	68.8707	66.0726	65.3393	63.8437	64.5383	61.2115	62.227	61.6865	60.7956	57.4619	57.6143	57.5739	60.0942	58.1444	59.1414
	29.2841	24.4763	22.2372	21.5994	19.9136	19.0429	18.77	18.6248	17.6006	17.8705	17.1951	15.9758	15.982	16.6194	15.4976	15.7155	17.7592	17.3606	17.3	17.776	17.8838	17.4659	18.3947	17.6337	78.1965	79.5512	87.2139	88.237	88.9588	94.2439	99.2569	107.131	105.094	105.854	100.67	93.3463	88.2045	84.9531	84.8224	84.0233	82.7593	81.9967	79.3154	76.0035	74.3372	73.8946	75.7529	74.6475	72.8929
	43.0234	38.9999	37.3361	37.0898	35.8559	35.5812	37.1179	36.1737	35.2867	35.7409	35.4808	35.4073	34.9549	35.259	35.5496	35.277	36.1947	35.7686	37.2168	37.0372	37.3072	37.4473	37.8901	37.2879	73.5218	71.6335	71.8243	68.6092	68.5024	68.2583	70.6454	74.2795	72.6687	73.7045	71.5798	69.856	69.1348	69.0698	72.1388	74.2327	76.0085	74.6574	73.8861	72.1005	71.5198	72.0696	73.6037	73.0745	72.4095
	57.8657	52.981	51.2258	49.7404	49.1275	48.4483	50.4285	49.162	49.0638	48.7928	48.5601	47.9895	47.3313	49.3131	47.6905	47.735	48.5948	48.3861	48.4337	48.4627	48.5788	48.9275	49.366	48.2285	65.1815	63.0886	64.8882	64.4713	66.9777	69.0909	69.9429	69.9517	69.4199	72.0062	72.4375	72.0679	73.8168	73.8396	75.7331	77.4436	78.3506	78.5566	79.5057	79.0597	80.0257	80.6741	83.392	82.4778	82.9171
	36.3895	30.581	28.9541	29.3174	27.4488	26.9202	29.8783	27.0133	27.6821	26.6797	27.0375	27.4957	26.7923	27.5835	26.5291	26.3409	28.7292	28.129	29.3745	28.257	30.3446	30.1243	30.3743	29.7425	57.0164	56.3776	58.7809	61.0828	62.6143	63.3229	63.7249	64.7161	64.7108	65.308	66.13	66.148	67.619	66.4662	70.3528	73.3565	72.3622	74.834	73.6911	73.8357	73.8194	75.228	78.2406	76.2279	77.9457
	56.6822	51.6924	50.03	49.1703	46.6611	46.9307	48.157	46.6942	46.373	47.0847	45.4796	44.8629	44.3038	44.6444	44.4402	43.6076	45.8614	45.0673	46.6495	47.0909	47.4605	47.8404	47.6209	46.9609	381.466	291.027	232.036	194.565	175.584	164.153	156.208	144.928	140.755	138.643	136.113	130.687	129.906	132.103	130.593	129.488	129.091	124.284	123.188	120.347	119.385	119.062	119.812	117.022	118.219
	78.7292	73.9343	71.0192	69.7975	67.6305	67.5704	69.082	68.0213	67.6133	67.5378	67.1717	64.6055	65.5785	65.2475	65.9254	65.4495	67.3973	65.5392	67.0405	67.7176	66.4679	67.0476	68.6648	68.1805	480.354	349.914	278.98	255.43	264.097	278.156	288.82	279.723	265.524	249.966	241.21	229.498	233.046	231.476	229.469	222.581	218.442	218.535	212.062	200.553	200.349	194.556	196.551	193.199	188.354
	63.8277	59.9871	58.1976	57.5968	56.0382	55.3064	56.7387	55.7543	55.2266	55.174	55.7982	55.3279	55.2063	56.284	55.9776	56.0984	57.4432	57.2414	57.7244	57.2207	56.9603	57.381	57.6932	56.7774	260.515	216.503	189.852	175.897	187.896	196.961	195.777	193.41	189.319	183.156	181.291	177.404	173.644	170.924	174.889	169.777	174.112	171.528	173.208	166.815	167.799	166.62	163.318	158.211	158.284
	72.3165	66.8083	65.2024	64.8013	63.912	63.1163	64.9305	64.1825	63.5012	62.855	62.7977	63.1621	62.4302	63.2881	62.4305	62.3676	64.0648	62.632	62.9795	63.6995	63.3173	63.2753	63.5962	63.3493	104.572	95.5081	92.1193	91.0717	95.4447	101.213	100.527	99.1866	96.9492	98.0156	100.338	99.6195	100.172	99.4337	103.767	103.612	104.28	104.752	104.226	103.569	103.37	103.173	105.193	103.397	104.24
	34.3204	30.537	29.3107	28.3825	27.0586	27.5861	27.8125	26.9143	26.7987	27.4623	27.4595	27.3705	26.5927	27.6565	27.421	28.3093	28.3572	28.7926	28.4292	29.1043	29.7288	29.0697	29.344	28.5578	126.885	102.283	96.8574	91.8725	104.526	109.387	90.1004	83.7037	82.1148	85.1959	84.7724	79.0259	78.4055	73.6668	70.9886	70.2155	69.0956	68.5909	66.5594	63.3033	62.8976	63.1184	62.7088	61.7329	59.8867
IP3R1 shRNA cells	22.1726	21.4205	21.4059	22.1257	22.3148	22.5469	23.7587	24.5154	24.9663	25.1232	25.5637	26.0154	26.1825	26.9489	27.8038	26.9659	26.3648	27.1154	26.5847	26.9485	26.4984	28.1905	28.8593	28.9557	26.1176	25.8376	27.5759	26.7495	27.9124	28.5117	29.3407	30.0362	30.1729	30.0667	30.3721	29.0124	28.7793	29.3925	30.2041	30.2027	30.8134	30.6326	29.8317	29.1329	29.7331	28.907	29.2253	31.1551	30.1031
	10.2626	10.1472	10.0067	10.4472	10.8121	11.3949	12.0356	13.5868	14.3815	14.9735	15.5425	15.9239	16.7697	17.3401	17.4841	16.9494	16.9411	17.2265	16.6057	17.5868	17.1438	18.2897	18.4872	19.1824	16.5812	16.904	18.1585	16.9296	18.4628	18.5225	19.5122	20.9116	20.5048	20.1598	20.2859	19.506	19.1623	19.9877	20.7931	20.3963	21.0443	21.2643	20.7759	19.9493	20.3743	19.5303	20.1952	21.4714	21.1695
	25.922	25.6601	25.2642	26.146	26.0403	27.0877	28.1723	28.7588	28.9848	28.8754	29.7388	30.5336	30.2378	32.1225	32.2362	32.0224	31.5892	32.0867	31.4561	31.7518	31.5518	32.7351	33.668	34.4176	31.7142	31.7816	33.5268	32.7946	34.2213	34.971	35.2921	36.35	36.4288	36.3345	36.6144	35.2464	34.4128	35.2568	37.0862	37.0299	37.3386	37.4272	36.5082	36.0396	36.2212	36.2186	35.9665	37.9268	36.4766
	27.4419	26.5197	27.137	27.6144	27.5885	28.3877	29.2853	30.0122	30.73	30.525	30.388	30.9273	31.2424	31.8337	32.6353	32.4469	32.1871	33.0962	32.3104	33.9525	33.5951	35.0299	35.7386	34.8342	32.0909	32.5483	34.489	33.252	34.2513	35.0207	35.6751	37.5149	36.8572	37.5024	37.8476	36.488	36.3583	37.2116	38.3041	38.2838	39.2669	39.1932	38.3928	38.1445	38.7556	38.765	39.0829	40.5179	38.8548
	16.114	15.8209	15.9921	16.4721	16.711	16.7468	18.4451	19.2829	19.5268	20.2805	20.5835	20.6201	21.4228	21.9987	22.8779	22.33	21.9779	22.7581	21.7164	21.6935	21.5287	23.5074	23.9555	24.0769	22.2029	22.0401	24.9332	23.3629	24.6565	24.8322	25.2994	26.8788	27.2232	26.0157	26.6975	25.2997	24.8093	25.8349	27.0519	27.3937	27.9967	27.9539	26.718	26.1141	28.1162	26.9888	26.827	28.9241	27.9378
	24.3088	23.5211	23.1847	23.9715	24.4982	25.1485	26.0742	27.3519	28.0872	28.0888	28.593	28.8029	28.8171	29.946	30.4761	29.9837	29.6355	30.647	29.347	30.0202	29.4519	31.4158	31.7038	31.7599	29.3877	29.4341	32.069	30.9456	31.7902	32.8167	33.4857	34.5217	34.589	34.4515	33.4802	33.278	32.7509	33.7412	34.9619	34.5014	35.1847	35.0756	33.8159	33.8233	34.9506	33.8908	33.8045	36.1033	35.4586
	31.5766	30.8491	29.756	31.4604	31.7354	32.0509	33.1188	33.6228	34.6247	34.459	35.4937	35.3884	36.2149	36.5432	37.3176	36.4173	36.6	37.6692	36.9629	37.051	36.6432	38.1154	38.4725	39.0908	36.066	36.3042	38.3135	37.4107	38.3241	39.0993	39.7027	41.0996	40.691	40.5661	40.6661	39.6775	39.4569	40.4686	41.8376	41.314	41.8618	42.3829	41.563	41.2729	42.4885	40.842	40.9642	42.894	41.3886
	40.1454	40.3844	39.9085	40.2469	41.2315	40.5183	41.6688	43.0455	43.5232	42.9278	44.4381	44.4715	43.9244	45.9048	45.4107	45.3296	44.7517	44.8687	44.3401	44.2614	44.14	46.6055	46.3316	46.6123	43.8644	43.6168	46.4081	45.0674	45.8013	47.2848	46.9016	49.1389	49.2845	48.6144	48.4878	47.4172	46.896	47.8706	48.8966	48.1673	49.4478	50.0106	48.7583	48.3459	48.8796	48.0279	47.1006	49.5665	48.3715
	14.3945	14.0576	13.6054	14.2267	14.8364	15.4602	16.0057	17.1994	17.7625	17.074	17.5306	18.2252	18.1328	18.9316	18.536	18.5805	18.1273	18.5779	18.4158	19.0128	18.806	19.882	20.6208	22.1745	18.9203	19.2276	21.2837	19.9784	20.8691	21.3882	21.3812	22.403	22.1512	22.4731	22.7003	21.6927	20.8268	22.0101	23.2432	22.9819	23.0323	23.0828	22.8712	22.5608	23.8129	22.7596	22.3812	24.467	22.6479
	24.7549	23.5843	23.5773	23.8181	24.0198	24.7048	25.4764	26.2007	27.2736	26.9852	27.5185	27.6484	27.8446	28.6455	28.7842	29.2765	27.9806	28.6701	27.8823	28.6743	27.9601	29.6092	29.9668	30.8092	28.4134	28.8698	30.0446	29.6621	30.9272	30.931	31.4434	32.6875	32.588	31.9718	32.1867	30.9583	31.3029	32.4351	33.0718	32.346	33.9195	33.5711	32.8441	32.192	33.0113	31.9244	32.0095	34.0755	32.9601
	22.2725	21.6259	20.5731	21.9251	22.1078	22.366	23.2514	24.2883	24.2386	24.6979	25.3106	25.7302	25.4586	26.1919	26.8181	26.4197	26.0024	26.5782	26.0708	25.8861	26.1584	27.2462	28.0176	28.7757	26.1671	26.2635	28.1697	27.7732	28.2033	29.0881	29.3256	30.41	30.4201	29.9794	29.938	29.2007	28.519	28.6153	30.3625	30.4816	31.1191	31.5896	31.0594	29.588	30.9211	29.5576	30.1446	31.5582	30.9633
	40.374	39.9362	38.5009	39.888	40.2652	40.7646	43.0164	43.3454	44.5302	44.286	44.3519	44.5707	44.9428	45.6141	46.5482	45.8379	45.6129	47.0602	46.4214	47.4384	46.4779	47.8366	48.4677	47.58	43.9326	44.1035	45.0702	43.314	45.7597	46.4037	45.7993	47.1041	46.9042	48.1116	47.294	46.4701	46.1856	46.9623	49.0525	48.29	48.36	48.7161	48.4401	47.1968	48.5916	48.2876	48.0783	49.7015	48.6797
	25.0539	24.073	24.1496	24.7493	25.588	25.3284	27.0827	27.4923	28.3014	28.4	29.2443	29.505	29.4101	30.7638	30.7303	30.3076	29.4184	30.1974	29.3652	29.9007	28.9979	31.1544	30.8914	31.6686	28.0021	28.5538	30.2868	29.4406	30.7368	31.0055	31.3459	32.6086	32.2104	32.4986	32.7983	32.0319	32.1765	32.5083	32.8043	33.435	33.9857	33.3193	32.6198	32.0556	32.8947	32.7127	32.4198	34.4123	32.8522
	27.9051	27.2646	27.4601	27.6402	28.1759	28.9273	30.6788	31.0704	31.2341	31.4635	32.9482	32.6761	32.8167	34.3586	35.0063	34.5223	34.2235	35.1639	34.7455	34.9241	34.9485	37.0932	37.5602	37.7539	35.7026	35.4305	37.842	37.0711	37.8145	38.5775	38.8157	39.8807	40.2155	39.7747	39.726	38.1167	37.8222	38.9388	40.2509	40.6359	40.608	41.6168	40.2369	40.7617	40.3891	40.5319	40.5307	42.8412	41.1547
	40.5877	40.3536	39.0353	40.6378	40.2362	41.731	42.7661	43.3982	44.4429	43.9884	44.0876	44.0433	44.2558	45.1136	45.5639	45.3359	45.6161	45.6252	45.0134	45.5023	45.366	46.3399	47.4442	46.9775	44.2168	44.2384	46.5786	45.5897	47.0047	47.7292	47.8419	49.0374	50.3234	49.8579	49.7956	48.8719	48.0003	49.2819	50.1864	50.9427	50.2854	50.8115	49.5613	49.3728	49.9527	49.5686	48.1514	51.356	48.2989
	50.5199	50.1672	49.9746	50.6742	51.7386	51.5724	52.8816	54.2345	54.5332	55.3677	55.594	55.9714	56.2689	57.3308	58.5287	57.7505	57.8135	58.7358	57.9291	58.0473	58.0382	59.3962	59.7531	60.3053	58.0108	58.1661	59.999	58.4598	60.0083	61.2268	61.8051	63.8036	62.6107	63.2688	63.5276	62.2992	62.0232	62.6086	64.023	63.9059	63.9851	64.189	63.4128	63.9323	64.4477	63.3541	63.4074	65.8237	64.9175
	28.5877	28.1966	27.6605	29.2236	29.0614	30.0496	31.2312	32.0765	32.4635	32.8657	32.7401	34.1227	34.147	35.4174	36.0213	35.4677	35.9144	36.6872	36.2521	36.0255	35.6625	36.9354	37.2198	38.2515	35.4897	35.5141	36.5937	36.3989	37.589	39.5682	39.6272	40.2443	40.4927	40.0265	40.5	39.9314	40.0176	40.609	41.5499	40.9136	41.9422	41.4815	40.8133	41.1398	42.3783	40.6688	40.3849	42.7336	42.5673
	58.1777	57.2082	57.2273	58.284	58.0813	59.0798	59.7412	61.28	61.7308	61.3371	61.8124	62.6244	63.4416	63.8542	64.4227	64.1374	63.6663	64.7572	63.6409	63.9454	64.3084	65.1038	65.9909	65.3329	62.4746	62.1894	64.3965	63.6061	64.548	65.3513	66.0185	67.3044	67.0798	66.9436	66.8036	65.5866	65.4451	66.5312	68.1974	66.8476	68.5386	68.4038	67.3321	66.9106	68.0266	67.7042	67.306	69.8857	68.4964
	54.9399	54.7998	54.317	55.4682	55.7083	56.5235	57.0995	59.624	58.9288	58.9994	59.8548	60.4629	60.4211	62.24	61.8172	61.4465	61.5848	61.6678	60.3545	62.1145	60.697	63.4081	62.9126	63.9356	60.3676	60.43	62.1862	61.5251	62.6073	63.5049	64.2439	65.4476	66.1482	66.1082	65.6311	64.9546	64.3485	65.6631	66.1455	66.0238	67.1877	66.1507	66.2628	65.7561	66.5464	65.1702	65.8784	67.482	66.6364
	27.8708	26.8505	26.7444	27.1992	27.6419	27.3558	29.4412	30.4712	31.3516	30.9281	31.7919	31.9963	32.4442	32.9997	33.8103	33.1442	32.4464	32.4866	32.8115	32.9048	32.7535	34.8632	34.5035	36.4484	33.5971	34.2105	34.7756	35.2081	35.6089	36.1097	36.6475	38.4513	37.9093	37.8335	37.8287	37.3858	37.7439	37.5992	39.7427	39.2056	39.7848	40.1387	39.1743	38.7028	40.4075	40.6287	41.471	44.0891	42.2475
	16.2398	15.4379	15.2308	16.202	16.6779	16.701	17.508	18.3736	18.3507	18.221	19.2633	19.7375	19.9614	20.4046	20.6508	20.9003	20.1687	20.8949	20.117	20.2904	20.1784	21.7953	22.2514	23.919	20.7443	20.6255	22.3052	21.3179	22.5254	23.3983	23.6231	24.6912	24.0919	23.8564	23.9309	22.5288	22.757	23.1546	24.7077	24.3453	24.578	24.9628	23.8763	23.1375	24.286	23.1494	23.1227	25.0744	24.2882
	35.9221	35.3315	35.0439	36.5065	36.7507	37.3717	37.9556	39.0683	39.934	39.6251	40.0374	41.5757	41.0825	41.8219	43.0035	42.2309	41.9771	42.6096	41.6149	42.4876	42.4369	44.1295	43.7807	44.4732	41.1665	40.9682	42.7372	41.7756	43.4086	43.2999	44.9605	45.6716	45.826	45.8862	45.4486	44.4739	44.3908	45.2688	46.5449	45.8991	46.2074	47.3409	46.0945	45.0587	46.178	45.5801	45.813	47.2136	46.588
	36.8284	35.7713	35.8497	37.0671	37.2553	38.0477	38.8158	40.035	41.0806	40.7706	40.7772	42.0195	41.5653	42.9608	43.3434	43.2998	43.5441	43.7854	42.7251	44.1344	44.0365	45.3205	46.1569	46.5621	43.877	43.8479	45.4179	45.0664	45.8051	46.5352	47.1718	48.1147	48.1287	48.5833	48.8809	46.8329	46.6226	48.1451	49.5701	49.107	49.8158	50.3078	48.9838	48.7464	49.0504	48.8719	48.6673	51.212	50.6472
	24.9261	26.3273	26.9007	26.237	26.0434	26.1238	30.5639	32.6179	32.6214	31.6509	32.8029	32.8685	33.7454	33.8104	34.0643	33.8873	34.2621	34.348	34.5445	35.4014	34.5792	33.6864	34.7707	35.9146	35.6514	35.2942	34.8133	35.3856	34.9886	34.7326	34.9375	35.5622	35.5393	35.4838	35.3018	36.2672	37.216	40.0568	40.002	40.287	41.4741	41.9098	43.3561	43.4297	43.7031	42.6119	43.2356	43.9409	43.4354
	20.042	21.3906	21.0888	21.9687	20.5821	21.2656	24.381	26.6082	26.6561	25.0179	26.231	26.5552	27.1285	26.6107	27.7105	27.0945	26.3413	27.9969	27.2198	27.5523	28.4774	27.2253	27.1773	27.7655	27.4383	26.9622	26.6245	26.6379	26.6893	27.4546	27.8641	28.0514	27.3586	28.052	27.6645	28.5448	31.5499	37.4216	37.1978	37.0385	36.953	36.9138	37.7084	37.4406	37.8249	36.5672	36.3381	37.0031	35.9691
	39.0778	39.8216	40.6089	41.216	39.5506	40.3294	44.4104	47.4061	46.9026	45.81	45.6092	46.5769	47.4425	47.285	46.4363	47.7857	46.771	47.2901	47.1279	48.2247	48.2896	47.579	47.3938	48.3256	46.8796	45.9362	46.1983	46.0911	47.8549	46.8575	47.8676	47.7591	46.7306	46.7458	46.8197	47.9872	47.3996	49.459	48.362	49.539	49.5473	49.6898	49.3797	49.1944	51.0287	49.8456	48.9245	50.1399	49.1611
	19.485	18.1165	17.1197	16.4193	19.8078	20.0413	20.3979	21.3988	20.8444	20.6255	21.613	21.2416	22.7614	23.0341	23.7269	23.3256	23.843	24.8447	25.0406	24.4343	24.4328	25.4504	26.7813	25.7459	26.3846	25.678	25.6559	25.2316	27.5749	29.8401	32.7057	33.9837	32.8751	35.9842	36.0151	38.033	37.158	37.2199	37.4658	37.0381	37.3075	36.9024	35.2117	36.6609	36.4543	36.9825	36.9311	36.653	34.8347
	10.3247	9.50425	8.23611	7.29982	9.33438	10.4222	10.7104	11.5423	10.0579	10.6904	10.9211	11.5399	10.9345	13.015	13.5126	12.9385	13.9727	13.5566	13.8877	13.6964	13.0357	13.8375	15.0749	14.0305	14.5448	14.1822	14.0748	15.1739	32.5566	37.3998	44.25	72.2086	117.159	149.543	149.935	141.802	141.535	138.091	130.854	126.295	120.562	115.921	111.38	111.081	105.172	102.375	97.8209	91.7818	88.9295
	6.29975	4.29985	3.5556	2.83208	5.07821	5.42433	6.29982	5.33792	6.09449	6.11818	6.83654	6.67999	6.8136	8.26976	8.50872	8.1577	8.8505	8.87965	9.36466	9.01672	9.22564	9.15825	10.1617	9.30681	10.8801	10.3455	10.2109	10.528	14.4077	17.86	26.4547	33.914	41.9141	58.0676	71.543	86.9887	100.597	97.8376	92.0421	82.8829	78.691	76.5315	72.9512	73.382	70.409	67.7084	63.844	60.8348	57.4732
	16.4896	14.5745	13.7937	12.699	15.6721	16.5629	16.4302	16.8489	16.0042	16.4125	16.9026	17.0164	17.1022	18.9017	19.2555	18.682	19.5632	19.9481	20.1376	19.9554	20.0516	20.2506	21.2003	20.2008	21.6967	21.4189	21.1487	21.5854	25.2129	33.7056	41.6033	52.576	61.8586	74.8785	89.6343	105.168	118.719	121.36	122.606	119.393	107.857	102.909	98.4302	92.7164	87.0419	81.6559	76.0415	68.9528	63.6576
	20.6156	18.815	17.7045	16.9049	19.913	20.1908	20.7802	20.9699	20.6882	20.8887	21.5496	20.7706	21.7073	22.9974	23.3423	22.8695	23.6156	24.5549	24.15	24.0913	24.0167	24.3814	25.9813	24.3265	27.3363	26.9973	26.6411	30.0848	51.4746	142.335	211.067	214.085	204.896	196.036	195.923	188.628	181.2	180.904	177.812	163.779	161.456	153.811	148.306	140.782	132.151	124.41	122.187	111.906	107.006
	12.2906	10.0421	9.85592	9.02488	11.7113	11.9248	12.3468	13.2025	12.8039	12.5366	12.9972	12.8855	13.2416	14.5337	14.9487	14.4905	14.9103	15.7822	16.3949	14.9826	15.8668	16.2295	16.4717	15.9179	17.5176	17.0428	16.2371	16.2602	17.4147	17.9797	18.9805	19.4346	21.9621	20.6794	20.5252	21.0949	20.6858	20.6264	20.2439	19.8313	19.7044	20.6521	20.7651	21.9148	21.6754	20.8732	21.5991	21.8338	20.7486
	24.2763	22.0313	21.3769	19.8629	22.0812	23.0523	23.4808	24.5871	23.356	23.5165	24.0723	23.9519	24.35	25.1047	26.1332	25.3756	26.3429	27.1165	26.6362	26.1592	26.6806	26.7838	27.242	26.2914	26.9606	25.8935	25.4213	25.7178	27.5279	28.3095	33.6847	38.6937	42.131	40.0974	39.6177	41.4744	40.5444	42.1288	41.6961	41.1908	42.7773	43.8179	45.3362	48.617	48.7849	51.1581	52.0064	53.5889	52.0016
	15.416	13.9943	13.6393	11.6558	13.966	15.0218	14.5757	15.5517	15.6256	15.0994	15.8847	15.3713	15.8603	16.9175	17.6849	16.4308	17.467	18.0294	17.8519	17.6071	18.5022	18.5591	19.316	18.1132	19.955	18.857	18.5141	19.1658	21.7984	26.9023	58.0875	115.066	140.597	129.105	116.047	112.678	106.831	108.905	100.547	97.2998	100.47	93.3569	94.5746	94.6169	92.7644	92.9029	88.966	84.5082	76.0268
	13.8695	12.747	11.6679	10.3264	13.0307	13.2318	14.009	14.3649	13.3163	13.6898	14.4909	14.7219	14.5253	15.2531	16.9045	16.4381	16.7943	18.0369	16.7842	17.3604	17.4027	18.141	18.515	17.6869	19.4125	18.048	17.927	17.8605	19.8585	22.448	26.4365	31.7795	33.1081	36.5728	38.5003	39.7699	39.0849	38.8042	37.3548	36.3869	36.8712	36.6758	35.9458	37.0018	36.1333	36.1599	36.8076	34.1898	32.4181
	17.9746	16.7347	14.5254	14.6304	15.6308	16.9324	17.5372	17.309	17.8439	18.1329	17.8575	18.611	17.8318	19.8666	20.4691	20.1901	20.7893	20.8127	21.2083	20.9062	20.4859	20.897	21.7782	20.9231	22.4719	20.8913	21.2585	21.1808	22.6656	26.971	34.9624	45.8549	53.0539	64.167	67.2196	72.1892	76.6091	84.3668	84.235	86.3523	91.6853	95.042	97.5746	103.701	102.378	104.821	106.331	101.443	94.9749
	11.6324	10.9325	9.3038	8.62336	10.8004	11.2715	12.1618	12.0445	12.3239	12.3392	12.4051	12.8999	13.2147	14.1313	14.3456	14.576	14.1887	15.5687	14.9616	15.2901	14.4655	16.009	16.0072	14.6814	14.2529	14.7158	15.1989	20.5664	77.8081	175.489	198.306	198.198	191.454	186.393	176.606	166.589	157.16	146.622	139.817	132.169	123.75	119.115	111.242	105.444	100.547	95.978	89.3911	86.224	81.3149
	20.3559	18.6934	17.8802	16.9288	18.7692	20.0218	20.3645	20.8299	20.3493	20.6456	21.1765	20.7869	21.4379	22.602	23.3479	22.091	23.0511	23.6781	22.9165	23.2974	23.2158	23.3148	25.2081	23.9191	22.6187	23.7096	22.9934	23.9306	26.2611	27.8088	28.1494	30.0144	31.0574	31.3707	31.2183	33.4043	34.3112	34.2532	35.9018	35.6643	35.6118	36.5703	36.5299	35.9139	36.9887	37.3894	37.0348	37.9315	36.2209
	12.2465	11.2637	10.2703	9.42385	10.4043	11.9834	12.8207	12.4039	12.0164	11.8607	12.3256	13.7373	13.1615	15.3118	15.3477	14.8104	15.7036	15.8119	15.9369	16.4747	17.6367	16.3372	17.2928	16.0149	12.1114	16.0029	16.5385	16.8723	18.625	21.554	27.9619	37.0686	55.7286	57.592	78.0666	97.914	137.166	162.998	188.843	174.7	155.217	147.511	134.514	128.198	122.246	116.264	113.417	102.966	93.5024
	28.9923	28.5515	29.3985	29.8157	29.0663	29.9373	31.0008	32.697	33.5694	32.3983	32.6363	34.233	33.441	39.5962	38.3198	41.1394	45.8765	49.2542	50.9612	53.8991	53.5563	54.2773	52.975	52.7247	53.1958	52.2177	52.6362	51.824	50.1664	52.4644	51.7089	50.5694	48.8615	48.7618	46.7349	47.9962	46.9843	46.4029	46.2227	44.1101	44.5556	44.2852	43.9256	42.2165	40.0718	40.5513	38.8208	37.7083	37.3471
	35.4033	35.1663	35.6893	36.2073	36.6984	36.8596	37.7872	40.2029	41.0912	39.9633	40.041	41.9611	40.5217	40.4154	40.6148	47.1919	54.6431	58.0451	58.1674	59.9957	59.527	60.1415	58.0394	57.6391	58.4679	57.575	58.2554	57.3858	55.976	58.4532	57.8306	57.5869	55.9255	55.3002	52.4565	56.8097	59.8603	59.5047	60.3747	58.7458	57.5584	56.9758	55.9801	53.1381	50.2438	49.2204	46.7714	44.1529	43.7161
	28.957	28.9827	29.7158	28.8475	28.5464	29.4566	30.7512	32.2191	33.0061	32.3769	32.5038	34	34.23	58.5595	57.6898	51.5332	45.805	44.1704	53.5088	56.0103	53.0456	50.8963	52.4659	53.7109	54.1229	50.7183	53.3088	52.8944	51.2685	52.9379	52.1701	51.6189	49.3607	48.6664	48.2569	47.3867	45.2903	43.5195	42.2273	40.2085	40.2242	39.3563	38.2983	36.6568	34.8772	35.2431	33.8453	32.282	33.1621
	50.1508	50.4146	50.7107	51.1902	51.5212	52.3032	53.2088	55.5951	56.202	55.1281	55.2664	56.7531	60.431	79.647	76.4494	71.1117	67.5359	73.369	79.113	83.7558	88.0375	92.0205	104.644	107.212	112.298	113.828	125.924	124.803	122.738	123.831	122.806	122.565	113.948	109.981	96.4292	104.571	104.196	101.231	98.5855	96.1551	93.7107	90.1956	87.3501	81.6413	76.1768	74.4821	69.5673	65.6064	63.5726
	32.6828	33.0929	33.3281	32.9036	32.9276	33.1931	34.8162	35.8693	37.4727	36.158	36.0934	37.433	44.6204	97.7259	91.1026	77.2591	65.8693	68.4464	88.3279	88.7	79.3512	75.3769	82.8975	85.137	83.4685	77.2994	80.8223	81.5252	78.1564	78.7953	78.5377	75.4805	71.7007	71.0325	64.8097	62.6515	60.1473	57.2231	54.3637	51.1272	49.1811	48.3196	46.3839	43.3825	40.861	41.0482	38.5133	36.4491	37.296
	32.3597	31.9638	32.694	33.6032	33.5032	33.643	34.6656	36.3341	37.8249	35.4978	36.004	37.5548	35.7034	37.208	54.6599	53.3656	48.3468	46.3545	45.199	50.1082	53.9151	54.1243	52.6893	53.0579	59.6308	65.5007	67.7091	70.0352	78.7336	88.7675	91.57	93.0569	95.1898	101.271	122.296	132.751	132.59	129.343	126.841	120.949	116.085	112.598	106.472	99.3914	93.7418	90.3171	84.0465	79.4573	76.4084
	28.5554	28.9154	29.6901	30.1103	29.8097	30.7963	31.9309	33.7287	34.2956	33.7288	33.7189	34.5164	36.361	50.9399	47.412	44.1265	39.6552	38.4749	39.3244	46.7902	45.8029	45.3141	43.9927	44.1943	47.0706	45.9784	46.3351	45.208	44.0502	46.2531	44.9387	44.1494	43.9233	43.2865	44.276	58.2284	72.7564	76.6066	83.3061	83.1113	82.4712	81.2795	78.1949	74.0653	70.9751	70.0079	63.7254	61.1865	60.1915
	41.3602	40.7012	41.5678	40.4626	40.5828	41.3541	42.0296	44.0376	44.5514	42.8138	43.1252	45.2449	43.5868	44.4442	52.5868	49.8037	47.3534	47.0683	46.3674	49.3627	50.5029	50.4981	48.9518	48.31	50.377	49.6075	49.4297	48.8131	48.5714	50.4572	49.7324	48.4888	46.996	47.153	45.6978	45.7131	44.4632	44.0908	42.8749	42.7637	42.7249	42.587	42.2311	40.6315	39.8751	40.0593	38.5951	38.2047	38.4936
	19.0125	19.053	19.2632	18.9718	18.9994	19.5518	20.2739	22.232	22.6702	21.0074	20.8015	22.4033	21.228	19.8288	19.0752	19.2826	19.051	19.5064	19.2897	20.4597	20.4657	21.2593	20.488	20.9051	23.978	24.0503	25.235	24.9511	23.6071	25.7488	25.1069	25.1554	24.3118	25.7157	37.5326	42.5083	45.7543	47.3228	48.5323	47.9094	48.39	48.4967	46.5128	44.8657	42.4569	41.9264	40.3085	38.078	38.425
	28.1057	28.2795	28.9432	28.5685	28.1039	28.3279	30.108	32.2158	32.2972	31.1944	31.7117	33.447	32.6386	31.2257	30.9933	31.4493	30.6266	32.0058	32.538	34.0885	35.4657	37.4636	37.7892	37.7332	40.214	39.1435	40.321	40.035	38.2287	40.2831	39.7089	38.2103	36.5343	37.3955	38.6057	41.3859	42.4587	42.8912	45.6931	44.6509	45.3314	45.6019	45.0333	42.5168	41.2815	40.573	39.5516	37.9514	38.3325
	23.8331	23.7468	24.4717	23.8509	23.8113	24.519	24.6836	26.9485	27.2066	26.2658	26.1051	27.9015	26.6783	26.3252	26.2666	25.8774	25.7204	25.9084	26.1191	27.3322	27.4771	27.9007	27.9695	27.6697	29.8152	29.297	30.4989	30.1958	30.8969	33.5414	33.7017	33.1101	32.493	33.2854	36.4612	36.7563	36.3097	35.5353	36.2603	34.7442	35.4697	34.5746	35.0093	33.9213	32.6734	33.2964	31.4305	31.1106	31.5614
	25.9761	26.4088	26.9935	26.8334	26.8585	26.9223	28.0511	29.7781	30.8623	28.6271	28.6653	30.2016	28.9203	31.2968	32.4924	32.4318	31.0314	30.5856	30.7481	33.0754	32.9776	33.9831	32.9658	32.6462	35.0312	34.6584	35.6826	35.6114	34.8271	36.5818	38.4981	37.6087	37.4793	37.0754	69.6813	91.8453	95.1604	94.8956	91.6605	87.4555	83.8822	80.9923	78.1469	73.4104	69.0474	65.7286	62.4654	58.144	57.6455
	19.5028	19.4054	20.2478	19.823	20.0552	20.4297	20.9347	22.5023	23.4853	21.9666	22.0442	23.6007	22.4908	22.5422	21.6692	21.3668	21.9297	22.4287	23.0681	24.4673	24.3925	25.4326	24.3732	24.8694	25.9139	25.5982	26.6435	25.6108	24.8941	27.1987	26.7341	26.5515	24.6295	25.4438	31.2594	38.5626	52.2726	65.144	83.3771	87.7274	91.1226	95.8834	91.8425	87.5969	81.2042	77.3386	74.4148	70.439	69.1392
	25.683	25.9925	26.7121	25.983	26.5322	27.0463	28.1622	30.3885	31.0397	31.0171	30.4146	31.4366	54.9715	79.1241	70.6708	57.5859	48.4261	47.6361	56.6822	67.0901	63.6818	59.6558	58.3419	60.005	62.4495	60.0521	60.3196	57.2104	54.7912	56.9427	56.1369	54.5367	51.1233	50.5387	45.3953	47.5391	49.9891	50.6417	57.1788	59.0962	59.3395	59.9083	59.5235	55.0634	54.8268	52.5915	51.1346	46.7479	45.9998
	22.4058	22.0808	22.3665	22.731	22.6331	22.6994	24.1765	26.2968	26.4983	25.7083	25.1841	27.0288	25.8966	23.8834	23.4275	23.7335	23.0548	23.0984	23.1938	23.9107	24.364	24.6726	24.0284	23.8808	25.4322	25.1733	25.9183	25.8261	24.7708	26.627	27.1297	26.4583	25.4219	26.1321	35.2549	38.4929	46.8433	51.2956	60.3628	60.4869	60.9094	61.7199	67.1762	64.5508	59.9429	60.2402	55.5071	52.2813	49.9384
	40.3056	40.8471	40.8755	40.4287	40.1026	40.7881	41.3254	44.0349	44.545	43.3241	42.5881	44.605	43.9935	41.9535	42.3025	41.9855	41.0689	41.9005	41.656	43.0813	42.4809	43.8661	42.6164	41.9953	44.0688	43.1299	44.7905	43.6456	43.6104	45.3297	44.9878	44.6289	43.6458	43.4486	45.7186	46.0409	45.0256	44.4621	45.3836	44.9665	45.6914	46.4067	46.9335	45.4845	44.7111	45.8377	44.3562	43.0891	44.2182
	23.9075	24.1867	24.4307	23.954	24.2283	24.3309	25.2981	27.1997	27.6547	25.9929	26.1711	28.2558	26.6866	27.603	29.2493	31.9965	34.3922	46.0405	58.103	70.587	75.1962	79.1733	78.4787	77.4406	80.3244	78.324	79.0451	76.0019	72.9973	73.3926	71.7434	70.0823	65.6875	65.9912	58.5482	61.1319	60.336	58.6159	58.2216	56.3018	56.6496	55.9197	54.3588	51.7334	49.4048	48.6811	46.3461	44.5029	44.4002
	44.9531	45.0877	45.5777	46.3072	45.5706	45.9563	47.6184	49.2536	50.5926	49.0549	48.4104	51.3037	56.9816	58.3362	56.6279	54.6177	53.2279	54.9253	55.8709	57.6509	57.0261	56.7837	57.0853	55.5415	57.4776	56.6818	57.0161	55.6317	55.5729	57.3007	57.0398	55.687	54.305	54.2778	56.0169	55.1003	55.384	53.7898	53.9474	52.3382	53.5081	53.8109	53.422	52.6007	50.8381	51.7298	50.1792	49.2289	50.383
	34.2326	33.8028	33.1408	33.1279	33.7615	33.928	34.1322	35.1984	35.8641	36.2607	36.3987	36.786	37.1833	37.3302	38.0041	38.7555	38.0189	37.4905	38.1504	37.6838	38.0037	37.608	39.0954	39.6832	39.7679	37.2732	37.0269	38.5553	37.8288	38.851	39.3777	40.1062	40.7173	40.8373	40.744	41.0123	39.8177	39.6129	40.1517	40.8648	40.8635	41.4	41.2412	40.5376	39.9236	40.451	39.7251	40.0048	41.7001
	40.587	39.8308	39.377	38.828	39.1131	39.9302	40.1999	41.2925	41.6828	42.087	42.5125	42.6492	43.541	42.8306	44.0912	44.7402	44.4198	44.1525	44.2866	44.2018	44.2124	44.0101	45.3954	45.6697	47.0295	44.2478	44.0145	45.5876	44.7366	45.526	46.2131	47.4752	47.6882	47.5546	48.2739	47.6907	46.7678	47.238	47.1392	48.2275	48.9474	48.6589	49.5147	48.1429	48.0289	48.8968	48.1822	48.3403	49.852
	23.9583	23.3071	23.2052	23.0812	23.4699	23.7919	24.3061	24.8713	26.2393	26.94	27.4619	27.9635	28.2996	29.0449	29.5475	29.6744	29.2033	29.196	29.4474	28.9004	29.7648	29.3745	30.384	30.558	31.1703	28.8788	29.1633	30.2685	29.1858	30.5365	30.5891	31.4607	32.6928	32.3347	32.031	32.142	31.4553	31.1526	31.8794	32.5886	32.2392	32.8096	33.0033	32.5734	31.8457	32.2198	31.4767	32.0621	33.1856
	37.6331	37.1011	36.8709	36.5227	37.2981	37.2052	38.1261	39.0794	39.5948	39.7934	39.6973	40.4559	41.1542	40.8944	42.5497	42.6496	42.4618	42.0814	42.5183	41.9645	42.2242	42.0485	43.0876	43.9066	44.5646	42.1912	42.2503	43.7827	43.1398	44.3923	45.0502	45.332	46.2602	46.3293	46.2465	46.4921	45.2918	44.5603	45.301	46.906	46.8566	47.1273	47.205	46.3989	45.9878	46.1472	46.1449	45.9237	47.6432
	38.169	38.4374	37.6267	38.1694	38.5891	38.5663	39.2688	40.0575	40.6961	41.3268	41.1467	41.0263	41.5	41.7768	42.2961	43	42.8346	42.6064	43.4047	42.7147	44.1563	43.8426	45.1019	45.7238	44.9301	42.522	42.9236	44.6272	43.5414	44.4185	45.0939	45.6681	47.282	46.7051	47.271	47.5738	46.3812	46.2675	47.016	47.9741	47.9563	48.8182	48.7537	48.0519	47.8341	48.37	48.3782	48.657	49.9149
	28.9852	28.4671	28.2088	28.3597	28.7827	28.9932	29.0247	30.5209	31.2588	31.4735	32.1372	32.404	32.4362	33.1429	33.6497	34.4235	33.9413	33.6315	34.318	33.4013	33.3811	33.2361	34.9774	35.3715	35.4784	33.8294	33.6861	36.2316	34.8502	35.9882	36.1428	36.5536	37.9425	38.2452	37.1835	37.7831	36.5539	36.1226	37.0246	38.0946	38.3951	38.9251	38.8875	37.8011	37.2701	39.0301	38.0391	37.8969	39.7401
	58.1005	57.1113	56.5316	56.5661	57.5268	58.4639	59.0509	59.5943	60.3709	61.4104	61.2666	61.5355	62.2268	62.6884	62.8764	63.8761	63.2311	62.8058	63.5144	63.0575	64.1902	63.2779	64.4588	65.816	65.1582	62.0476	61.9852	64.3689	63.2535	64.8244	65.2835	65.7246	67.7347	66.5326	67.8417	67.0012	65.6849	65.9091	67.1989	67.7358	67.5028	67.8617	68.0184	67.4336	67.3442	67.767	66.9121	66.349	69.1118
	36.6622	35.6823	34.9894	34.6934	35.3856	35.849	36.4209	37.235	38.3583	39.0047	39.0061	39.4492	39.6337	39.6461	40.638	41.1037	40.6711	40.3652	41.2538	40.1117	40.7032	40.2039	41.9291	42.182	42.2313	40.1475	40.1883	42.5027	41.5161	42.2579	43.1593	43.7465	44.6559	44.715	44.5943	43.7417	43.5642	43.1014	43.9709	45.0422	44.6381	45.2378	45.142	44.0364	44.0429	45.0323	44.1022	44.0264	46.0437
	42.3732	42.0703	41.4313	40.471	41.9683	42.2097	42.4868	43.4245	43.8669	44.7463	44.6009	45.5088	45.4165	46.1416	46.4297	47.109	46.3192	46.4795	47.4173	46.7978	46.8751	46.5173	47.8086	48.1217	48.6639	46.011	46.22	47.9824	47.1906	47.9917	48.6713	49.2003	50.4247	50.0666	49.9571	50.0448	49.1782	48.9848	49.8717	51.0714	50.6126	51.0925	51.5491	50.8308	50.5766	51.6417	50.1989	50.3061	51.9969
	50.351	49.5884	49.7979	49.3808	49.6774	50.5403	49.9153	50.9235	52.1296	52.5481	52.0265	53.3493	53.3786	52.8995	54.6335	54.2009	54.1299	53.6239	53.7263	53.2635	53.1945	53.0882	55.2468	55.0071	55.2527	52.8469	52.63	55.0741	53.9003	54.5429	55.8413	55.506	57.4636	57.5909	57.0048	56.894	55.9572	55.5011	56.354	57.2516	56.6136	57.7338	58.226	57.1307	56.7699	57.2367	56.4916	55.6801	57.8376
	27.8916	26.9515	26.6545	26.2557	26.8035	27.341	27.8909	28.3717	29.4235	29.9196	29.3131	29.7153	30.3272	30.2458	30.9494	30.601	30.6402	30.241	30.6379	30.4951	31.0209	30.8388	31.7863	32.4369	33.8045	30.9394	31.2101	33.0204	31.8713	32.6554	33.1124	33.1062	34.0055	33.7839	34.0673	34.2672	33.3804	32.6182	33.6598	34.7448	34.515	34.5593	34.6037	34.4176	34.1444	35.2461	34.3194	33.9864	35.8215
	36.6135	36.0748	35.045	35.0388	35.2506	35.4282	36.0307	36.7093	37.3462	38.2895	38.036	38.5047	38.6189	38.7914	39.4953	39.6172	40.0498	38.911	39.5169	38.8245	39.5206	38.8929	40.3421	40.6563	41.3963	39.2913	39.6924	40.7247	40.3886	41.4999	41.5033	41.9534	43.0458	42.9584	42.4174	42.606	41.5273	41.8299	42.8242	43.3832	42.7459	44.1274	43.8215	43.1833	42.6107	43.3301	42.3758	42.4505	44.2642
	34.371	33.8907	33.3217	32.3948	33.5849	33.7458	33.9729	34.7521	35.6643	35.6206	36.0246	36.5635	36.9325	36.6936	37.3384	37.8891	37.5388	37.1718	37.6782	37.232	37.0696	37.309	38.2654	38.9435	39.6097	37.3166	37.4015	39.0772	38.7286	39.1066	39.8842	40.0929	41.0457	41.0545	40.6673	40.631	39.9832	39.3841	39.4688	41.0039	41.1085	41.6685	42.0817	41.616	40.3235	41.4946	40.2968	40.8124	42.0542
	50.6265	49.7888	49.405	48.1466	49.3628	49.6934	50.1311	52.1041	52.3923	53.4299	53.2161	53.2738	53.4654	53.7912	54.379	55.1966	54.5749	54.3779	55.6448	55.0857	55.9758	55.1351	56.3242	56.8764	56.0997	52.9066	53.0563	53.9028	52.3648	54.5064	55.0702	54.5411	55.6832	55.5082	56.5648	55.8494	55.1283	54.8793	55.5591	57.388	56.7209	56.7822	57.0937	56.8522	55.7644	56.9848	56.7188	56.5357	57.9557
	59.6955	59.6437	58.4883	58.3814	59.1828	59.807	59.6761	61.6228	62.8163	64.2192	63.7919	64.1437	64.6292	64.7799	65.745	66.3134	65.2445	65.5005	65.6395	65.4388	65.6909	65.8319	66.4027	67.4837	67.4887	65.3779	65.1394	66.8815	65.6958	66.9992	67.6899	68.3571	69.4726	69.6813	69.7474	70.02	68.8012	68.1245	69.6011	70.5736	70.504	70.4398	70.9551	70.4143	70.0006	70.6214	70.2124	68.8333	72.013
	36.936	36.3377	35.4749	35.5423	36.0698	36.8075	36.5791	38.1217	38.4818	39.1929	39.2795	40.0215	40.2506	40.1672	41.3564	41.327	40.9556	40.1745	40.8588	40.1277	40.5982	39.805	41.6995	41.4685	42.1511	38.9298	39.4147	40.9374	40.1939	41.3327	41.5688	41.8677	42.9765	42.6269	42.8799	43.1431	42.4702	42.5971	42.8885	43.1483	43.702	44.1854	43.6004	42.9864	42.491	43.2277	43.068	42.8107	44.5599
	39.6317	38.8446	38.2815	38.4535	38.6117	39.0826	39.7429	41.2818	41.6257	41.7695	41.971	43.2747	43.0358	43.1593	44.5127	45.0812	44.6564	44.3942	45.2194	44.8523	45.009	45.0304	46.9121	47.3217	47.4916	45.6921	45.4534	47.5688	46.8927	47.5447	48.2138	48.4226	49.3563	49.6498	49.2635	49.2207	47.8098	47.5514	48.5306	49.6808	50.0183	49.9938	50.8779	49.6685	50.1286	49.802	49.9272	49.9261	51.9507
	50.8586	49.976	49.7709	48.6152	50.0199	49.6679	50.978	51.8848	52.4385	53.3535	52.9555	53.0424	53.0035	53.1896	53.9408	54.335	54.1354	54.3807	54.3887	53.8531	54.2811	54.1618	55.0143	55.9808	55.5724	53.1555	53.1744	55.2232	54.3576	55.5962	56.2302	56.3289	57.3748	58.4996	58.0925	58.038	57.23	56.4674	57.5886	58.3798	59.0412	58.4664	58.9265	57.8331	57.6682	58.1754	57.8395	56.5997	59.4026
	59.288	58.6715	58.363	58.1946	58.8064	59.7371	59.5918	60.7363	61.9186	62.1796	62.9086	63.1063	63.4359	63.6958	64.6231	65.6689	64.9895	65.0445	65.8497	65.1455	65.2486	65.2407	66.4261	66.7376	67.2194	65.2168	65.3524	66.9522	65.6088	66.9603	68.0235	68.528	70.2709	69.2306	69.8045	70.0302	68.9589	68.7182	69.2288	70.4622	70.36	70.4291	70.6069	69.9301	70.383	70.8324	69.8789	69.9254	72.0318
	40.5323	39.4445	39.1008	38.6296	40.0033	39.8608	40.729	41.767	42.5093	42.8492	43.2022	43.092	44.3057	44.3271	45.4419	45.9718	45.4861	45.878	46.5559	46.1743	45.9755	45.657	46.7737	47.0231	47.928	45.5054	45.5268	46.4739	46.3031	47.347	49.0824	49.1342	49.6751	49.8928	49.4842	49.8992	49.4008	49.4763	49.9947	50.8193	50.2617	51.163	50.7594	50.1738	50.4599	51.5451	50.0471	49.7983	51.8564
	57.1817	56.9931	55.3788	55.3113	56.6148	57.098	57.0683	58.3102	59.4705	59.9878	59.8978	60.9258	61.4016	61.3432	61.9761	62.8793	61.8416	62.3296	62.8455	61.7509	62.4811	61.6065	63.2761	64.0064	64.9102	62.9535	62.487	65.0284	63.7677	64.712	65.3344	66.3879	67.0499	67.4092	67.2102	67.4079	66.4828	65.6984	67.1097	68.0693	68.6624	68.1959	69.5151	69.2676	69.2277	69.5372	69.2118	69.0098	70.4883
	65.8063	65.3625	64.516	64.5327	65.4553	65.2784	66.15	66.7273	68.0699	68.4631	68.1197	68.5343	69.2426	69.9552	70.315	70.8107	70.5619	70.1512	71.1022	70.129	70.3945	70.7109	71.4043	72.1775	71.604	69.1119	68.8632	70.7878	70.0986	70.9199	71.6201	72.2015	73.3221	73.1264	73.0077	72.8857	71.8252	71.7019	72.6483	74.0999	72.924	74.3971	74.2797	73.3462	72.979	73.9512	73.6703	73.3234	75.5703
	78.2833	79.0099	77.5297	77.801	78.0162	78.5112	78.9418	80.342	80.5782	81.7349	82.194	81.54	81.9678	81.9542	83.5756	83.957	83.4	82.3275	82.6003	81.7523	82.6853	82.0199	83.7488	83.5011	84.3172	80.2559	80.2192	81.8333	80.5845	81.5666	82.277	83.2154	83.5608	83.9391	83.8903	84.2736	83.5509	83.1941	83.8019	84.6267	84.0137	84.143	84.1591	83.7145	83.6078	84.7772	83.9503	83.4043	85.1876
	64.5331	62.5348	62.4124	61.9906	62.9963	63.2061	63.9181	64.4211	66.6249	66.0181	66.0798	66.8264	67.357	67.3205	68.9073	68.5385	68.2151	68.3358	68.4082	67.2624	68.7978	67.5613	69.926	69.4939	70.3859	67.2739	67.3282	68.8604	68.2837	69.2277	70.0104	70.6547	71.7041	72.3146	72.2798	71.864	71.2743	70.746	71.8919	72.3123	72.2062	73.2204	72.3168	72.4145	71.9729	72.6616	71.4623	72.0795	73.4768
	38.559	38.8144	37.9175	37.8243	38.2241	38.6133	38.3617	40.1945	41.0994	41.8727	41.5007	42.2594	42.4388	42.8322	43.3199	44.0315	43.4468	42.8341	42.8694	43.1547	43.2366	43.1037	44.9556	44.6399	46.3465	43.8444	44.3827	44.8787	45.2583	45.61	46.0493	46.5212	48.1032	47.6279	47.5614	47.5572	47.1688	47.4828	47.3559	49.2354	48.7645	49.2723	49.5826	48.7371	48.3237	49.8181	50.012	50.7501	53.0437
	14.3586	14.1842	13.485	13.3044	14.1513	14.5662	14.5863	15.2898	16.0441	16.0241	15.9111	16.8194	17.2325	17.4276	17.8136	18.0281	18.2454	17.6081	18.2407	17.5631	17.7141	17.6166	19.0248	19.422	20.8737	18.1095	18.0061	19.4688	18.6091	19.6605	20.4204	20.6161	21.5457	21.0242	20.8192	20.884	19.6634	19.8622	20.2083	21.56	21.2447	21.4472	21.782	20.8365	20.1934	21.1931	20.2037	20.1805	21.8792
	45.8366	45.8848	45.3666	45.1141	46.3974	46.6116	47.1564	47.6685	48.6442	49.403	49.1323	49.4937	50.8419	50.4097	51.0576	52.0928	51.416	51.1936	51.7478	50.8763	51.6408	51.5965	53.079	52.7736	53.38	50.4834	50.3095	51.8596	51.017	52.4476	52.3524	53.8067	54.4293	54.5645	54.6172	54.2341	53.3807	53.3078	54.0767	55.1937	54.6285	54.8983	55.8904	54.7996	53.8927	54.8726	54.3492	54.5531	55.779
	47.4209	46.6798	45.7524	45.8212	46.8892	47.0543	47.7492	48.4227	49.4916	50.408	50.1363	50.1421	51.2308	50.8328	52.0554	52.3906	52.3524	52.5664	52.7777	51.8489	53.0833	52.9976	54.1219	54.8542	55.2088	52.8579	52.8324	54.2072	53.8994	54.5462	55.1853	55.7425	56.5676	56.5798	56.9776	57.2379	55.4458	55.2617	56.5941	57.8407	57.4357	58.0557	58.486	57.3279	57.1202	57.3862	57.2301	57.051	59.2766
Time (s)	0	2	4	6	8	10	12	14	16	18	20	22	24	26	28	30	32	34	36	38	40	42	44	46	48	50	52	54	56	58	60	62	64	66	68	70	72	74	76	78	80	82	84	86	88	90	92	94	96
[truncated: 102 more columns]

## Sheet: Figure2E-2G
	Time (s)
NS shRNA	0	14.6975	16.8768	20.1857	21.923	18.9818	17.6981	22.8288	19.6792	23.3225	17.6264	22.092	22.281	18.6562	24.5182	23.6503	21.5657	16.6682	19.5561	19.6683	23.3706	21.687
	2	17.5008	18.0428	20.9599	20.2783	19.7709	18.9998	24.6449	21.9115	23.3095	19.6108	23.8072	24.4669	20.2622	25.5665	23.6974	22.0575	16.6958	22.4379	20.2428	20.433	25.8335
	4	14.342	16.6561	20.4765	21.1687	17.8489	18.5302	20.7107	19.5374	22.7273	19.4837	22.6171	22.0291	18.3896	24.2618	24.6064	20.2833	16.5915	21.0751	19.0523	22.6785	24.2767
	6	14.6975	16.8768	20.1857	21.923	18.9818	17.6981	22.8288	19.6792	23.3225	17.6264	22.092	22.281	18.6562	24.5182	23.6503	21.5657	16.6682	19.5561	19.6683	23.3706	21.687
	8	17.5008	18.0428	20.9599	20.2783	19.7709	18.9998	24.6449	21.9115	23.3095	19.6108	23.8072	24.4669	20.2622	25.5665	23.6974	22.0575	16.6958	22.4379	20.2428	20.433	25.8335
	10	14.342	16.6561	20.4765	21.1687	17.8489	18.5302	20.7107	19.5374	22.7273	19.4837	22.6171	22.0291	18.3896	24.2618	24.6064	20.2833	16.5915	21.0751	19.0523	22.6785	24.2767
	12	14.6975	16.8768	20.1857	21.923	18.9818	17.6981	22.8288	19.6792	23.3225	17.6264	22.092	22.281	18.6562	24.5182	23.6503	21.5657	16.6682	19.5561	19.6683	23.3706	21.687
	14	17.5008	18.0428	20.9599	20.2783	19.7709	18.9998	24.6449	21.9115	23.3095	19.6108	23.8072	24.4669	20.2622	25.5665	23.6974	22.0575	16.6958	22.4379	20.2428	20.433	25.8335
	16	14.342	16.6561	20.4765	21.1687	17.8489	18.5302	20.7107	19.5374	22.7273	19.4837	22.6171	22.0291	18.3896	24.2618	24.6064	20.2833	16.5915	21.0751	19.0523	22.6785	24.2767
	18	14.6975	16.8768	20.1857	21.923	18.9818	17.6981	22.8288	19.6792	23.3225	17.6264	22.092	22.281	18.6562	24.5182	23.6503	21.5657	16.6682	19.5561	19.6683	23.3706	21.687
	20	17.5008	18.0428	20.9599	20.2783	19.7709	18.9998	24.6449	21.9115	23.3095	19.6108	23.8072	24.4669	20.2622	25.5665	23.6974	22.0575	16.6958	22.4379	20.2428	20.433	25.8335
	22	14.342	16.6561	20.4765	21.1687	17.8489	18.5302	20.7107	19.5374	22.7273	19.4837	22.6171	22.0291	18.3896	24.2618	24.6064	20.2833	16.5915	21.0751	19.0523	22.6785	24.2767
	24	14.1788	16.1497	20.7413	19.4466	21.5167	17.8573	20.2539	18.5541	23.0517	18.4984	22.0014	22.6435	18.0239	23.8593	24.2166	21.4231	17.3201	21.4138	18.8847	24.9931	22.3667
	26	13.7525	15.9255	19.9337	19.1109	19.73	17.0589	21.3135	18.4143	23.3663	19.8261	19.4349	22.0045	17.8703	22.7313	24.8281	20.708	14.4469	19.9453	17.695	21.1188	24.265
	28	16.5387	16.8639	20.4693	20.4892	20.2021	20.2619	21.7102	19.1613	21.9275	20.8804	23.2853	24.829	18.2819	25.0491	22.5104	22.1326	15.1395	20.9782	20.065	21.6954	24.3428
	30	14.1396	15.4639	23.6467	19.0985	18.5711	17.4396	21.5748	19.9631	22.84	17.4387	19.9922	23.1238	18.0937	21.4555	22.9356	18.4946	17.859	18.3295	17.877	20.1448	25.2739
	32	14.3682	16.5413	19.9864	18.4813	21.0691	17.2002	21.3443	18.0257	22.9776	20.6044	21.7375	22.6505	19.1267	24.3204	24.4447	22.1864	13.8622	17.7761	18.9941	21.2487	23.1466
	34	14.8282	16.2084	19.3346	17.8518	20.1733	19.9343	20.9771	17.6573	19.9006	18.9212	18.5491	21.4995	17.7375	23.4611	21.8175	18.4719	16.5512	19.6906	18.5781	20.7605	24.6097
	36	14.7806	16.3555	20.9393	19.5716	21.2834	18.4964	20.052	18.314	23.0442	17.2536	19.205	22.4497	19.0404	23.6856	23.407	17.456	15.2368	19.5647	17.353	21.2885	23.3268
	38	13.726	15.662	20.9584	18.947	17.642	18.2373	22.5943	17.6309	20.2944	17.7251	19.4274	21.9396	16.8967	23.0092	20.4528	19.0776	14.5847	18.5762	17.0099	21.8171	23.7876
	40	15.9214	17.217	18.4347	19.8409	20.9803	17.9816	20.3279	16.6418	23.5153	21.3142	21.9519	21.4665	17.1115	23.7668	25.8909	20.2578	14.9593	19.285	18.3156	20.6256	23.6256
	42	14.9952	15.3191	20.3814	19.2233	19.1321	18.3537	19.8361	18.0028	20.6717	17.4277	20.0348	21.5704	18.2702	21.6129	22.2332	20.0537	14.8355	19.2436	17.2456	20.5882	19.9636
	44	14.8757	16.622	20.5798	20.0926	19.7013	16.7893	23.4051	19.3312	22.3178	19.06	20.0055	23.3143	18.4423	23.2308	22.8999	21.1529	19.413	20.4074	19.037	21.6238	25.6075
	46	14.3728	14.9539	20.044	17.3669	19.0278	18.4951	22.9822	16.2823	19.491	19.5913	21.5246	20.9682	17.5318	23.4893	22.8932	19.3549	16.4383	19.0618	18.1095	18.0198	20.5389
	48	16.2667	18.5731	25.5187	20.1338	21.4208	18.796	23.8415	18.6802	22.1815	19.8477	21.3526	20.2527	18.3244	22.754	23.0984	23.365	18.2742	20.1223	19.4113	22.2331	26.9322
	50	16.3938	18.873	22.9036	20.578	21.3033	19.1287	20.98	18.7656	20.5203	19.3491	20.9832	21.936	18.6089	21.2642	24.7197	20.2438	17.2202	20.3466	18.02	20.2813	26.0452
	52	17.6328	19.5798	20.867	21.2686	22.3266	18.5982	23.8766	18.505	19.1627	19.7991	22.8365	21.8519	19.2385	23.0595	25.0034	20.9283	17.9878	20.3378	19.7331	21.2626	23.8773
	54	19.0553	19.6411	20.7357	21.8527	20.7293	19.4403	22.364	18.936	26.5793	19.9751	22.0866	24.5367	19.3504	22.5236	26.9703	20.6682	20.8832	21.346	19.685	22.9959	24.0038
	56	18.1581	23.0546	23.0748	22.5706	23.2887	19.1883	22.4916	20.2125	22.1179	23.3363	23.0351	23.4384	19.5589	25.5985	23.7979	23.2297	20.7196	21.0722	19.5414	23.1353	26.6329
	58	21.0021	18.9647	28.2251	25.3733	24.9004	21.9054	24.8885	19.4556	24.1305	20.9847	22.7468	21.9826	20.6371	24.134	26.6944	23.3553	20.1753	21.3436	21.2719	23.719	28.2499
	60	17.9795	22.0769	25.3787	25.3459	23.5367	22.6855	25.889	18.3735	25.032	21.6124	24.8578	23.6658	24.9269	24.2636	28.5835	23.1712	22.9747	23.9955	21.8111	23.2262	28.8189
	62	20.8563	22.3407	24.6333	26.1591	24.3643	22.8705	23.0932	19.975	24.3245	21.6479	20.7458	24.0125	25.389	26.9624	25.3375	21.6555	26.4003	24.5932	21.5647	24.6162	29.6062
	64	21.8581	22.0728	29.3291	25.2218	26.9562	20.8363	34.1074	20.179	24.8856	21.9469	24.0063	27.241	24.477	26.9101	31.3598	27.3656	20.2243	23.2967	21.0898	26.3393	31.8217
	66	25.7098	25.3925	25.5902	27.0726	24.4464	23.9811	33.5721	20.871	25.6478	22.0105	24.3455	26.8212	24.4265	26.4527	31.4663	25.9146	26.0856	24.2324	20.9673	24.9776	33.5845
	68	25.9246	21.4691	23.7421	29.1383	27.354	22.6984	37.1279	22.8596	27.3784	20.7398	26.8764	28.2365	28.0761	28.6547	35.1846	29.0583	26.0419	24.3095	23.7047	24.5547	33.7773
	70	24.6731	24.3549	29.7503	28.519	29.0065	24.9249	37.3817	21.9249	27.6577	23.4795	25.622	28.7479	26.4263	29.6248	34.9124	26.0482	28.3713	24.9823	23.4434	27.5468	38.2452
	72	25.4931	22.8103	34.1243	24.7737	28.5377	26.44	37.47	23.6949	26.494	27.6124	29.0489	30.3678	26.6494	29.4944	35.4433	26.6408	33.1403	30.9252	23.8532	28.9578	42.4893
	74	30.9016	27.4756	29.8458	29.9174	29.4623	25.9119	35.6922	25.6004	29.1088	23.8376	28.3729	31.6133	29.9857	32.3591	36.3512	28.5626	30.1443	27.6536	24.3741	29.3783	38.4071
	76	28.2083	26.5383	29.2055	31.6908	31.5826	31.3039	36.7951	24.3108	32.9921	28.2387	27.7891	32.4335	32.341	32.7945	34.9608	26.6606	33.7781	29.1698	25.7171	32.1049	48.9326
	78	25.9447	29.0002	28.9856	31.3199	31.7459	29.1893	42.0274	26.5154	26.5485	26.749	28.6248	33.7801	31.2695	31.5082	42.0893	30.5723	27.9684	29.1289	27.1886	33.4836	44.0398
	80	32.8352	25.4591	37.6682	32.0506	34.6895	29.3744	41.7522	28.8498	33.0313	26.177	31.9861	31.2973	32.4066	33.8486	32.6589	33.9943	32.6802	31.268	25.1441	34.2558	42.4272
	82	29.5685	29.5412	30.8055	34.2857	35.9775	32.0381	42.0649	28.2934	33.8132	27.056	29.4229	33.1697	32.3817	32.5304	33.9619	27.3383	41.0076	32.3307	26.6135	33.0476	46.8196
	84	30.374	36.6963	34.7545	40.7904	39.3949	31.2724	49.6927	30.4851	33.253	26.4402	27.3407	37.4623	36.5744	38.9324	41.8592	35.3046	38.9667	33.755	27.7325	34.0198	50.8289
	86	33.5459	28.9324	31.9737	36.6362	37.1214	31.83	41.8194	27.9117	32.2543	28.6047	29.873	36.4463	32.6578	35.3561	40.7112	29.1306	35.6467	35.5442	28.8955	33.3184	46.5438
	88	30.7122	31.1533	30.1201	33.3463	36.1367	34.5327	40.304	30.1547	34.8612	26.7066	27.611	37.5752	34.1181	33.647	39.0594	26.4842	45.5019	33.2698	29.2233	33.5956	49.3772
	90	32.3087	29.6545	33.6039	34.9672	38.8094	34.131	42.2803	30.4183	31.7497	30.0401	32.6223	38.3532	36.8958	35.8247	46.3041	31.7591	37.8792	35.6855	30.0011	41.5488	56.5536
	92	37.3111	35.4847	35.4884	44.1779	43.5834	33.7126	41.5436	30.6133	32.0673	30.5556	33.4863	40.1874	36.8669	34.5523	38.6044	29.6849	40.312	36.9655	26.1652	36.0275	54.2317
	94	34.1487	37.4654	37.9742	39.7299	42.8289	32.9464	42.814	34.9375	34.6867	28.9056	30.3589	41.8019	38.4774	35.5926	45.5801	41.0336	43.249	38.8008	28.5724	36.7004	55.0084
	96	29.7052	36.7458	33.3979	36.618	33.8765	38.4438	39.5002	32.9752	34.203	30.8389	33.7867	43.7152	38.1103	37.0092	44.2223	29.5782	48.227	34.7148	30.1168	38.6749	56.61
	98	32.016	33.1956	36.8189	39.8786	38.5509	33.6287	45.542	35.1381	34.3257	29.6482	32.5663	43.1872	37.347	37.7432	39.9972	33.2082	42.3508	38.9899	29.477	36.3332	57.0771
	100	33.9148	33.34	41.2477	38.8894	45.7915	33.9795	43.5624	32.9133	36.4147	30.8814	35.6399	51.2735	37.5269	38.6279	41.4775	34.17	48.531	37.3791	33.8242	37.2128	56.8432
	102	34.1473	33.5258	34.7928	41.9056	39.1626	39.3211	46.5384	33.5728	35.3093	31.0143	34.0466	44.6248	45.0866	37.1982	44.218	30.7438	45.2456	39.9436	32.9766	36.4119	64.1844
	104	35.7927	34.5904	30.6132	38.6253	41.2914	36.8352	41.5385	34.4511	35.2979	30.1413	31.6691	49.4314	39.2767	36.5323	42.1083	31.5248	48.1319	39.7086	30.0413	38.1656	56.3459
	106	34.3301	36.9928	35.7675	43.9604	40.6222	35.8557	46.37	36.3036	36.9882	32.4165	35.5627	49.9617	40.8328	38.373	49.5308	36.4927	55.8898	41.2859	34.127	35.1129	60.1018
	108	34.6304	31.1866	33.678	37.7774	40.0913	41.3122	46.0804	37.353	38.1744	33.6467	36.1019	52.0107	46.8117	41.1144	43.7198	32.3827	45.9168	41.0407	32.4802	41.9116	63.8069
	110	36.5084	38.0222	34.1971	36.5044	40.6965	44.2143	44.7127	38.9599	35.5752	36.2045	33.0723	52.3518	42.2282	37.5632	47.1072	30.2117	43.958	39.0001	31.4197	39.4246	68.2735
	112	33.1801	34.5124	35.652	41.0726	37.9407	38.4249	43.0248	37.6133	39.3265	35.51	38.8902	53.982	40.2662	36.7127	49.0445	43.7269	53.2434	42.0904	34.1331	39.5738	63.8087
	114	34.3042	37.1367	34.6046	42.4146	37.112	39.3059	42.5729	41.4402	34.3383	30.7854	34.9279	54.9493	44.7679	37.4536	47.1276	39.5222	43.0454	40.2864	31.9033	40.71	64.7974
	116	31.1132	31.9821	33.7849	43.7001	43.9361	42.2636	48.6437	38.8838	37.1179	33.4258	33.2296	55.9723	45.409	39.9174	48.1884	36.5471	49.6632	41.9577	33.2535	36.8235	64.5551
	118	36.7992	38.9768	34.6188	42.5413	44.1944	38.1003	45.9235	40.8616	40.8643	33.9979	38.5438	56.2926	48.1391	38.9343	56.4157	30.468	54.0049	41.8084	34.5859	40.9862	68.0376
	120	40.0682	43.7713	34.4156	40.1379	47.3482	40.5544	44.8365	40.5508	35.0759	34.7903	36.2145	59.2906	43.0025	36.7607	48.1958	44.6859	44.3739	46.5317	37.8714	46.0349	68.1619
	122	35.6345	37.5493	37.5435	39.433	43.1585	39.4551	44.9531	47.277	43.9221	34.8215	37.8903	60.0605	45.6251	39.295	51.0102	37.2929	46.9008	42.7529	32.1577	39.2331	62.3275
	124	32.4593	38.706	32.5131	43.8481	48.5163	39.5058	41.2127	47.1236	36.3177	33.6689	37.5456	62.0768	47.6234	39.7694	45.7178	34.8074	48.0447	43.9403	35.5204	40.9104	68.743
	126	34.9264	40.9389	35.6925	44.3316	41.8078	37.3231	43.7458	40.969	36.0305	34.731	39.982	58.5728	41.51	37.7782	43.5504	35.6268	48.1305	39.7815	36.5563	43.7134	65.0159
	128	35.3499	37.5697	34.6807	41.0585	43.0424	45.3427	44.5142	47.4356	39.0766	42.9786	39.093	61.248	51.7321	38.7384	46.8987	38.362	56.6559	48.0503	35.9027	40.5892	54.0876
	130	35.1892	37.782	33.0658	35.2828	43.1806	41.0178	38.5284	45.1613	37.7676	33.3166	38.2544	59.7701	53.7691	40.6922	47.0815	40.2706	45.2786	46.1759	35.8502	43.5945	70.5419
	132	36.5712	36.7806	35.4515	39.9686	39.7538	40.9883	40.7946	43.1132	37.6365	35.7518	38.7698	54.865	51.2468	39.0498	48.5155	39.7609	52.7329	46.5728	35.9361	41.6533	61.2511
	134	36.377	38.9002	38.0326	48.476	41.6188	37.8752	37.5766	47.2663	30.7985	38.7204	39.3634	60.04	52.501	40.5221	47.6731	39.5816	49.9975	41.9529	33.7482	40.465	71.2091
	136	37.9949	35.2718	34.0116	44.4094	40.8699	39.8883	44.0586	47.3843	43.677	38.3977	37.8391	68.1531	50.0265	39.0099	45.1363	37.3008	67.1143	43.9934	34.9624	43.1967	61.3587
	138	37.9784	38.0568	32.3257	45.8957	40.7571	41.0931	37.0827	44.4019	37.6256	36.9153	37.8592	66.3997	52.8101	38.0557	44.2761	42.1842	54.7805	41.3451	36.86	35.8953	71.0188
	140	33.6093	37.9863	41.8547	45.685	46.266	42.1099	38.6973	49.39	42.6197	37.9459	39.5611	70.9261	52.4334	40.553	48.035	41.1198	51.9172	46.5444	37.6812	49.0835	64.7214
	142	35.2824	35.6073	31.4395	41.5369	44.1847	39.3304	37.7493	46.2051	32.2076	34.9166	38.8435	66.2692	51.4617	37.0453	49.6415	39.6486	50.0005	44.1513	31.9068	34.7295	59.6195
	144	34.5496	40.8253	37.858	44.4494	50.7153	43.7063	40.6328	44.9983	37.8839	35.3224	39.695	69.9149	48.2866	41.5808	47.892	41.5768	53.1623	42.2925	34.6427	43.4007	67.4252
	146	36.0642	35.8762	36.0435	38.2753	49.4614	37.5113	38.4385	47.9393	36.5908	39.0483	35.5727	64.0598	49.1994	40.7972	54.2549	36.3468	52.2959	44.6681	35.2675	40.9824	68.984
	148	30.7919	37.9738	35.7285	40.7444	38.8533	42.9712	35.79	46.5238	38.4251	37.8127	37.0041	60.0505	46.7505	35.9876	51.8695	39.1002	51.1714	40.6572	39.6296	35.0004	63.7169
	150	29.4337	35.1117	32.573	39.776	41.3272	37.7421	35.7074	44.9379	36.0798	34.96	34.5509	68.7838	44.5512	37.1645	44.497	38.7173	57.4003	40.2133	33.8207	40.6815	63.0058
	152	29.4437	36.9422	33.132	45.6363	42.8217	37.4862	39.6781	48.3279	37.2447	38.2395	39.872	70.2902	44.811	40.7108	47.4143	28.8052	51.9492	39.3581	36.5177	36.5457	66.7449
	154	31.7256	41.5367	34.8086	42.7619	39.2156	39.5969	36.7896	52.1892	33.0076	33.6821	41.4066	69.2679	46.9831	35.7674	44.5756	35.3566	47.1029	42.4655	35.8342	35.4563	71.3535
	156	33.4465	40.1378	35.2317	44.429	39.2123	39.4823	36.0578	44.7678	30.8978	35.8066	41.859	67.4734	56.3022	41.5347	49.206	34.8864	54.428	40.9895	33.4448	40.3659	60.8311
	158	32.7015	32.0596	30.1572	36.286	38.7018	37.5683	34.487	45.0857	37.1421	31.5552	37.4871	64.4851	43.8062	37.5862	45.0727	32.7731	46.5138	37.7811	32.3483	35.2408	63.4334
	160	32.659	43.2268	33.5429	43.3134	41.661	35.7992	38.4548	49.0029	38.6367	35.2142	38.974	66.9595	51.3949	37.9794	45.9211	31.9766	57.4193	41.4449	35.5887	37.5525	66.8901
	162	30.477	36.5954	31.6772	43.5674	42.6839	39.5524	35.8904	48.2621	35.358	31.925	38.6832	65.5949	46.5958	37.8148	47.6053	31.7556	47.655	42.9262	32.1664	33.283	65.2692
	164	31.2532	36.9304	32.2895	45.3619	40.6045	37.4748	36.3142	48.0255	35.4443	34.3462	35.7598	66.507	49.3782	38.2296	44.802	36.6246	34.2817	42.3352	33.7466	39.088	61.4542
	166	33.9714	36.6258	37.4857	40.4521	38.9295	42.0413	32.8176	41.863	40.4091	33.3566	34.5782	67.6602	50.2809	33.5919	48.4966	27.0016	50.2087	40.0898	33.8282	31.8445	59.3953
	168	36.1095	36.24	39.4492	42.0585	39.0339	40.6869	34.7889	48.1224	37.3063	35.6297	38.0178	69.3057	41.8359	37.2725	48.9333	32.9322	54.611	40.3246	36.2745	40.3264	60.767
	170	30.5092	35.5985	26.2614	37.2553	37.4976	36.8691	34.3316	44.7576	30.3278	34.5237	34.2194	63.686	47.8467	36.9354	43.9051	35.0982	44.5241	40.6171	32.3922	33.4212	59.2072
	172	32.7186	38.573	34.2982	41.0625	41.8806	36.8156	36.0421	49.4328	35.9391	35.5488	35.4677	61.9173	45.6754	36.4888	44.7218	30.4407	40.9826	39.7441	35.5846	39.1772	62.3233
	174	28.0048	42.2771	31.7375	40.2078	38.1442	38.536	34.9824	48.0722	34.6291	37.504	32.5839	59.9588	51.1992	35.2816	47.7332	29.5878	41.8995	42.0048	34.7808	37.6702	56.0868
	176	31.7235	36.0931	32.6808	43.9739	42.1394	39.4724	34.5357	46.2285	35.0554	37.7009	35.4153	66.7569	50.3821	37.053	48.7511	38.1793	55.877	41.2885	32.1	35.9265	70.0875
	178	29.2799	34.3977	33.2119	42.359	42.7602	39.2627	35.4761	45.3558	36.2122	34.1161	36.2184	61.4836	45.5215	34.8944	42.3068	35.1859	47.287	41.2257	31.4185	35.9203	63.5263
	180	29.562	32.8872	30.4417	40.6543	37.7217	35.4348	37.1489	44.1694	34.8062	30.3368	36.9834	70.9231	47.6484	34.3249	47.814	36.3424	51.0011	40.158	33.6377	37.0526	60.0522
	182	31.4816	40.6645	30.9298	39.5238	39.7083	37.1493	34.7756	49.1379	37.4634	31.6482	35.7182	66.0513	50.3968	38.2291	41.1462	34.356	54.5698	41.4121	31.8936	36.3849	59.8199
	184	32.0751	35.1969	31.8622	38.731	38.7579	35.8801	31.2583	48.2127	29.6991	31.6142	35.1637	64.8176	42.869	34.0532	49.7588	41.3051	50.1618	40.6543	28.9125	31.5447	67.7073
	186	31.3097	30.5451	33.5975	29.6412	37.0311	35.6426	34.3564	52.6679	36.0783	29.3951	33.7081	64.942	48.1676	35.0547	47.5253	34.2935	48.4158	40.1377	32.1894	35.9637	55.6454
	188	31.3802	32.2015	31.1323	33.9339	39.7645	30.5336	31.8437	44.8793	32.3057	30.5651	32.9176	63.4933	47.5286	34.3161	45.7047	32.8336	40.8408	40.2503	33.4755	33.2477	59.9216
	190	33.6778	35.4552	28.588	36.8732	41.7786	33.4382	39.3984	53.1053	32.9307	32.1405	37.6948	67.3503	48.8052	37.0509	46.6641	38.3349	54.5539	39.8002	29.527	37.7105	60.3148
	192	29.5975	34.772	33.2502	36.0365	39.512	35.2729	31.4818	53.0131	35.7388	33.9559	34.6477	65.6311	47.9345	35.2843	40.0917	34.984	48.5849	38.5766	36.9571	38.6262	61.4929
	194	32.7701	34.034	32.454	31.603	37.3291	36.8975	33.4108	48.0772	36.5169	31.8565	32.1341	67.4791	51.5797	36.1953	45.474	36.6995	47.7114	39.3679	29.7111	37.1659	60.5215
	196	32.7738	39.4994	32.9967	38.4359	42.4016	32.2239	30.9884	45.196	32.8787	32.7662	31.6837	62.8871	45.8385	33.6199	46.6052	30.7058	39.7394	40.7807	32.9821	32.9834	60.3306
	198	33.5538	32.5204	32.1016	36.5962	36.8019	34.9202	33.709	48.9516	33.5828	30.9413	34.4597	62.6327	48.5844	33.8575	40.7453	39.4071	53.3492	41.0927	30.5973	34.0502	55.0846
	200	29.9281	33.3379	30.3427	33.9182	39.2326	33.8586	29.188	41.2335	32.4809	29.9266	34.9758	61.6044	46.6996	33.2479	42.3403	34.1821	44.6964	36.8695	32.4619	31.8029	54.8202
	202	27.0077	33.2623	26.8397	36.5834	36.4656	33.4597	30.0064	43.5065	33.9476	32.7294	32.7919	63.68	48.2548	31.5547	38.2084	30.3953	41.2499	39.0347	29.7798	31.9449	51.5383
	204	33.347	31.4636	30.8234	37.2374	36.4117	33.7929	29.911	43.4683	34.2562	31.6422	37.0897	68.4696	49.9491	34.162	41.0993	32.7113	42.9965	36.5857	29.8401	37.4928	51.743
	206	28.1114	38.7216	31.6179	36.9005	37.9352	35.6776	33.8588	42.25	34.098	32.7323	35.7515	64.5559	41.9365	32.2063	41.5482	28.3986	38.5567	39.1669	31.1256	32.0133	59.6298
	208	26.6444	30.9851	27.817	37.218	38.8884	35.1606	29.4025	46.1668	31.1822	29.0507	33.2847	59.3195	45.0115	32.2629	44.8171	30.4828	37.903	33.4907	30.1425	33.2326	50.8931
	210	32.4588	32.5831	28.5859	37.1625	40.3136	36.6607	32.3958	47.8107	33.3622	29.2579	34.0264	63.0486	41.6025	33.644	42.6147	33.4602	45.5256	35.8845	31.9774	32.7993	51.5287
	212	27.7616	32.266	27.4315	31.3129	37.252	37.2817	27.9269	51.0556	32.3116	33.4275	32.4322	62.8351	45.2882	34.25	38.4848	37.6562	40.1532	36.0381	29.6889	33.4575	49.6365
	214	27.2761	33.7518	28.0735	33.9839	40.8148	34.2765	31.9581	44.0402	32.0951	27.8361	31.502	63.1694	47.9031	32.4478	44.0216	30.8092	42.3333	39.5597	30.8976	33.402	51.4998
	216	31.137	32.7449	26.5977	34.2584	39.4821	34.1645	30.5058	48.4755	30.5676	29.1701	32.243	66.4824	42.1614	32.297	40.1887	28.3319	37.612	32.6904	30.7937	30.4859	52.3766
	218	32.7231	34.855	30.5496	35.628	38.1076	34.1821	32.3512	49.7349	33.0679	35.1014	33.5873	62.407	45.0286	31.5027	39.8956	36.8666	45.0255	36.3091	30.7961	32.9984	49.4539
	220	29.7437	34.4467	29.5882	36.0932	38.5566	33.3262	29.79	47.332	30.7312	32.3229	30.8013	63.7923	47.3135	32.8993	38.7434	29.9379	46.9149	35.4206	30.3952	26.9253	51.7712
	222	27.4212	31.0447	28.5375	31.4817	33.3618	33.8057	31.6177	47.021	35.0327	31.6955	33.3855	66.4218	47.3271	31.0279	41.905	31.3062	42.7551	35.4656	29.7371	33.6817	46.9767
	224	32.437	31.9075	26.7936	33.7032	33.0459	30.504	29.469	46.5596	33.713	29.4603	30.0425	64.4621	45.8737	31.3756	39.6758	34.0613	42.2118	34.6303	29.6983	26.275	46.5856
	226	29.1321	32.0343	31.531	35.1001	37.7878	33.8131	31.2699	50.9907	31.1584	27.9509	35.4099	61.727	44.6007	31.2551	43.5149	41.1278	43.5647	34.4422	31.2035	31.2782	50.1277
	228	26.2771	30.6027	28.2631	34.092	30.3663	32.2323	28.724	44.656	32.389	31.5349	31.0425	65.1628	50.5886	31.5615	40.0675	28.8637	49.4331	36.9586	30.0705	34.2657	48.1694
	230	26.4464	33.9784	31.455	33.1292	34.5415	33.0531	31.7617	51.6064	28.8588	29.0496	32.7355	63.8259	46.2165	32.8769	39.6912	31.1332	45.5502	36.5024	28.0674	35.3783	49.1381
	232	23.5493	35.3192	25.4747	31.005	35.9706	30.426	28.4681	38.5758	32.4366	26.4432	29.4402	59.5935	44.7925	32.1239	39.7963	31.4107	37.5628	33.3315	28.5608	32.5092	49.706
	234	28.1201	31.0328	28.0047	29.8625	36.0867	34.0583	27.4722	45.5364	32.9351	27.2475	32.1105	62.7592	40.3851	32.0917	39.7659	26.1726	37.3948	34.0041	28.0158	34.4458	54.3959
	236	29.5751	32.5936	25.5909	30.45	32.7864	32.3853	29.5546	39.6051	28.8271	28.3012	31.7432	65.5879	44.027	31.0402	38.1027	33.4032	38.3864	35.5425	27.5094	29.4674	49.0641
	238	30.6584	31.7139	32.1071	32.3343	30.3962	30.9837	30.7609	48.7335	30.2825	30.484	29.7435	59.8488	44.8829	31.8033	36.0128	31.8466	36.3446	33.5218	28.6092	29.6758	45.6157
	240	28.7699	31.9731	28.1608	30.7719	34.5015	35.2044	31.3409	41.0516	28.6901	31.5492	32.4145	58.9498	45.8128	28.3622	41.4462	28.9068	37.7172	34.6106	28.2483	27.5228	51.3266
	242	26.311	33.3932	30.3966	30.837	36.44	36.6348	26.3247	46.2916	31.7184	31.8764	32.3574	60.7741	46.5666	29.7881	42.9459	31.765	39.0169	32.9614	28.6959	29.5719	54.4024
	244	26.0863	28.9187	26.0353	30.2802	31.3768	32.557	32.6239	44.8145	29.3394	33.9057	30.0784	58.3506	38.5564	29.2202	41.2865	27.2126	39.6691	33.4294	29.5368	29.3492	45.9039
	246	26.5564	30.245	26.4595	33.2885	32.2137	30.1805	27.4822	43.5274	31.4434	27.9245	29.8332	55.4363	43.0871	30.2017	40.865	32.7455	35.4784	31.4781	28.0312	23.1349	47.5993
	248	32.4669	31.0732	25.6806	34.4314	36.567	37.6001	29.016	42.4116	30.8386	30.7414	29.6417	59.515	43.7229	29.6051	36.217	34.0733	36.8997	34.9302	27.843	28.439	47.3206
	250	22.6041	31.2462	26.42	30.716	32.4346	32.6704	27.5782	44.7676	29.2998	30.7068	29.0867	56.0542	43.3903	31.4161	36.4706	28.9883	33.1348	31.6984	26.1325	30.1954	42.6587
	252	29.5091	32.0388	26.6339	32.2171	30.1239	31.1617	29.9584	40.295	28.2714	24.0737	30.3789	60.0701	37.1144	27.381	33.565	31.7225	40.4473	31.2262	29.6545	29.1751	45.4167
	254	29.9195	31.9693	32.7492	30.8869	34.0748	30.8992	30.4499	43.3035	30.9365	30.5734	29.8409	58.5342	43.0839	28.883	39.9859	24.5867	36.7124	33.6512	27.1675	26.6988	47.065
	256	25.9682	29.9415	25.331	30.234	34.1012	31.1156	29.4346	45.6561	32.6583	26.4124	29.6697	63.0067	38.8416	32.1399	38.0495	31.4913	34.9809	32.3023	27.9543	31.394	46.8299
	258	25.7495	32.5323	25.259	31.0323	36.0017	33.4494	31.4311	45.4634	37.0935	29.4577	29.9796	59.025	43.0419	26.068	37.1744	35.2325	34.6625	34.7258	29.0064	29.9376	46.3644
	260	28.3443	30.723	26.1437	30.5575	31.069	34.0632	22.691	45.1983	29.808	26.9776	29.647	56.8924	40.5584	31.5666	37.9672	33.9804	41.746	32.605	26.176	27.4483	40.4501
	262	28.0179	27.24	24.2246	28.6081	32.9898	31.4072	26.8036	41.8091	27.1989	29.8513	30.0737	58.3139	45.2084	29.4614	37.4826	29.8027	41.2877	32.0443	27.9785	31.963	47.0729
	264	25.0356	29.6357	26.7419	31.9631	33.5002	34.1964	30.5002	43.3745	28.9212	30.1541	31.6613	55.658	37.6956	28.5349	39.3867	32.8209	35.5297	31.2396	28.5324	29.7507	40.2491
	266	25.624	27.8723	26.424	29.9179	30.3028	30.4981	28.1467	41.476	27.4079	29.0458	29.9033	55.4251	41.1977	28.8208	38.1604	29.4714	34.5192	31.9469	26.4928	25.1203	42.4957
	268	25.419	29.1431	25.6062	30.7876	31.5051	30.6662	26.3364	41.3117	33.7281	28.4415	30.2692	54.9895	40.406	28.4574	42.4258	32.0243	35.7164	30.9131	26.1724	29.7179	49.5376
	270	29.3603	27.3345	28.3478	27.2072	28.4451	32.3588	28.2482	47.7625	29.7534	26.934	31.6717	55.3386	42.0816	26.1434	35.029	24.15	33.8792	31.6666	29.5684	28.7682	46.8072
	272	28.0547	30.9253	22.9723	28.2736	34.6092	26.9426	28.1758	40.1224	29.9566	25.9587	29.8427	59.3499	39.8996	28.3413	38.1733	28.8484	35.3467	30.0967	25.9106	25.4029	41.8237
	274	24.9437	30.8641	26.4864	28.3455	33.0152	30.2174	26.8635	40.2619	28.6955	28.5567	28.4482	56.5634	38.808	29.7158	37.495	27.3641	27.1844	31.3884	28.7879	29.1988	48.8132
	276	27.8287	29.8227	29.119	27.3531	31.7454	28.0814	26.3375	41.5295	33.1351	29.8125	31.2564	62.0416	41.6059	28.2498	39.7841	29.1877	38.2774	27.5967	25.769	31.315	50.5683
	278	26.1614	28.5623	24.4981	27.0768	30.675	30.7715	24.6235	41.1392	29.782	29.3599	29.3281	49.5931	41.653	27.0834	34.0177	28.6407	30.4536	29.0024	25.5712	24.7042	45.3028
	280	25.7699	30.7362	22.2083	30.1012	28.0456	32.1579	28.9087	42.119	26.59	27.2263	30.8237	56.9086	40.5977	27.428	34.8892	29.4959	36.0944	30.5903	25.7233	30.4379	41.2931
	282	27.6423	27.2775	23.7958	25.1538	32.8025	31.4211	28.3327	39.3712	30.5912	25.8965	28.1658	54.5293	44.7078	27.8289	34.9231	28.5105	30.2532	28.4309	25.8348	29.4265	43.6273
	284	25.8394	30.246	27.8963	28.6058	33.7511	34.1894	28.4388	35.3025	28.371	26.9853	29.7682	53.4608	42.7918	28.6462	35.8228	29.4614	39.6262	31.0185	30.1308	28.3954	45.3316
	286	22.4731	28.1874	28.0245	26.7489	27.3574	29.1993	25.2936	34.7872	28.3863	24.6588	27.4061	50.7543	40.9148	25.8985	34.3993	29.1453	33.5687	31.315	26.3833	24.4325	42.7159
	288	26.7085	28.4146	27.334	27.5782	27.2238	30.7835	26.7214	42.3936	30.7149	24.5774	27.8034	56.0868	41.2485	25.6493	35.6891	34.2231	34.96	30.368	27.3006	26.0172	47.431
	290	22.487	23.9331	23.9104	28.7376	30.1375	26.7031	24.1214	42.1811	23.9961	23.5255	26.1516	52.7999	35.5501	25.2921	35.723	31.9198	29.205	28.8646	26.9654	25.7351	40.1522
	292	22.1708	25.7559	26.3914	29.3809	32.3287	30.4159	26.2095	39.6703	27.2855	25.5105	27.8478	58.8786	39.8293	26.2526	36.0925	32.0317	35.3016	30.1334	25.9318	27.3838	44.7275
	294	24.5994	28.8601	23.4549	28.0493	29.1184	28.8274	27.6728	34.6522	26.6939	25.0436	26.4746	51.3817	38.9991	25.645	36.5329	24.0595	38.447	29.2897	25.0975	28.5979	41.7045
	296	30.1058	29.2722	27.653	30.3639	28.2828	28.3284	26.1612	38.8515	28.6708	25.329	26.6046	52.4696	41.4145	25.4349	34.1319	28.4397	38.3876	29.5735	27.8483	27.1185	39.7017
	298	25.3029	29.1733	23.3928	26.0348	29.7627	28.7187	28.2955	41.6857	27.1596	26.5575	30.1697	59.7546	37.5284	24.5267	38.2686	30.364	32.6915	29.7014	23.749	25.9859	37.0611
	300	26.1972	26.619	27.3271	28.4728	29.3308	29.0217	25.387	43.853	28.0611	25.1301	26.7694	51.1164	41.6052	25.7849	37.7654	29.935	32.7379	29.4494	26.7381	25.8708	38.7052
	302	26.1028	29.3182	23.3104	26.6258	27.7595	30.8498	25.159	38.1536	25.5624	25.0728	25.4842	50.7108	39.6753	24.408	31.9897	26.473	29.8505	26.9914	25.0269	23.926	44.4316
	304	21.5897	26.8363	24.5766	29.6266	31.2477	30.6232	25.7294	34.7022	26.3427	24.0956	27.8761	49.781	37.0458	23.1782	32.5221	25.5093	35.0954	32.2122	28.0844	27.4673	42.2076
	306	23.3382	27.278	25.664	25.1527	28.3014	29.5785	25.1468	34.3723	25.9236	28.8785	26.9114	54.0537	40.6691	24.1233	31.3514	26.6199	27.9588	28.3871	27.0032	29.735	39.3004
	308	26.8847	29.0523	24.2813	27.4603	29.1633	31.5756	29.8784	36.9529	28.9547	26.2951	27.5635	53.1918	41.6885	25.0446	32.0732	27.5342	29.674	29.0621	24.0263	25.0806	40.9256
	310	25.7981	27.3188	25.5129	23.4617	29.1242	28.9839	24.7491	36.9967	28.3146	23.6546	26.3474	51.1294	41.4018	23.8825	33.369	30.0361	32.3244	33.3439	24.6877	22.8252	42.8519
	312	24.5411	27.977	25.4319	24.0201	31.0662	32.3446	24.8957	38.7767	23.9731	25.4278	25.9093	52.5292	38.6928	26.782	31.1923	23.2702	34.5221	30.4287	26.6777	26.7218	37.6512
	314	22.4994	28.486	23.2111	24.5815	28.7104	27.8911	26.816	36.2456	26.1377	23.6655	27.6765	50.4892	37.0146	25.986	32.9564	26.8585	38.6073	27.9031	23.097	26.5333	34.2282
	316	22.9513	27.2832	24.62	24.5581	31.4472	30.9071	26.3177	38.3465	31.1747	25.2866	27.4675	52.6534	36.2101	25.9376	35.2133	29.2025	36.3885	30.3951	25.8954	27.2834	40.8956
	318	23.9949	29.9155	24.5859	28.8373	30.3357	30.4705	21.9564	38.8098	26.1408	26.8416	27.4136	50.6759	34.9719	24.0582	31.8873	29.3365	29.9282	29.8309	24.612	29.9253	37.2734
	320	23.7086	27.4524	24.9325	26.4997	28.9908	29.3357	23.3211	37.8637	26.9754	26.2874	23.1365	50.9862	35.8626	22.2359	31.0715	26.0985	32.546	27.7932	24.1823	22.3333	35.4444
	322	22.732	27.6893	24.7839	26.1595	28.4943	27.6416	25.5301	40.3897	26.2419	26.315	27.2137	49.2843	38.2139	23.6567	32.0266	26.8191	31.1199	28.7188	25.364	25.1625	43.9722
	324	26.0791	27.6386	23.9978	26.7241	28.2619	31.6161	24.3041	37.1039	30.7642	25.0504	23.8602	46.7064	38.9248	23.6486	30.2514	24.3722	33.4885	26.0679	24.6698	25.5673	34.6366
	326	22.9403	27.8644	25.8608	25.4272	30.7728	32.7542	26.9746	44.2781	27.1551	25.2343	25.7046	50.5006	32.5263	23.1441	29.809	26.3243	29.7169	24.4095	24.9204	25.144	41.1037
	328	22.7461	28.1112	23.6549	27.2127	26.57	27.099	23.8955	36.0587	25.1381	26.4229	26.4706	49.8976	37.0521	25.284	32.7781	28.2176	36.3352	30.0695	24.4237	25.5814	35.5026
	330	24.3863	27.6358	22.615	27.5098	30.4253	29.7794	25.2879	36.9137	27.6969	26.9956	28.2387	50.7495	36.9241	22.9225	33.6172	26.9123	37.9746	27.159	22.8742	24.4964	41.4639
	332	24.5088	26.9386	23.16	26.327	26.7215	29.2765	23.4913	37.2644	26.1763	26.5889	26.4289	47.149	37.2614	23.4942	32.5595	29.8193	33.8879	28.9049	23.4888	24.8409	33.5855
	334	24.7571	26.7932	22.3421	22.7516	28.9408	30.8555	22.2896	38.6676	26.6015	25.6812	25.7134	47.8568	36.327	24.3021	34.4639	32.6192	28.2002	27.3682	26.7087	23.1735	36.3496
	336	24.2204	27.7811	23.2364	26.5722	27.8095	30.4174	27.0522	36.103	26.9407	26.7378	27.4871	47.9975	34.1855	22.8948	34.9738	27.7416	30.8064	27.4908	25.8217	24.6292	35.324
	338	27.5461	27.3428	21.867	26.7967	26.9507	25.9809	22.2213	38.6081	29.207	25.459	23.661	44.979	33.7195	24.2458	29.4885	27.7463	33.1425	27.6859	22.4186	26.8583	36.5523
	340	22.6435	28.8931	26.3872	25.1977	28.9267	28.7421	24.0602	37.3814	27.5076	23.8519	26.3796	46.2282	34.8865	25.7318	27.5547	26.5831	29.4353	28.9249	25.149	23.239	37.8048
	342	22.6469	26.8092	25.8485	25.1326	28.3513	28.3438	22.9551	31.7372	26.5818	23.7721	25.3149	44.1999	35.1617	22.304	28.6966	30.2596	30.0287	25.4827	24.6113	23.6784	40.9218
	344	22.4932	28.3642	23.5752	24.9336	30.0366	28.0481	24.237	40.6919	27.8397	26.3753	26.6721	47.5553	36.0124	22.8768	34.3401	26.7591	27.8614	28.114	24.381	25.4947	32.7655
	346	23.4428	25.7834	23.62	25.2075	28.1525	27.2508	21.5017	34.1186	26.7123	29.0922	24.9406	43.5873	37.2625	21.8919	26.8779	29.5662	32.6466	23.5712	24.8542	23.4709	34.3117
	348	24.466	29.7125	23.1854	28.7466	27.4554	28.7158	26.1115	39.2146	23.4861	26.3227	25.6636	45.4582	35.5165	24.2564	28.8495	29.7175	30.6283	27.5259	25.492	22.826	33.4116
	350	21.0492	26.9404	23.1902	26.6897	24.1125	28.3378	24.2059	35.8973	29.2472	27.6314	24.6253	42.9175	37.0015	22.7453	32.6855	26.365	36.4063	26.9391	23.0344	23.4216	38.1896
	352	25.5816	25.7184	24.5549	27.0337	29.0485	29.764	25.7495	33.4707	27.5378	24.1102	28.2817	44.6797	32.7718	22.6823	32.3182	29.2396	33.0208	26.9435	22.4802	24.3211	32.8053
	354	23.8341	27.032	22.2923	26.4484	26.4146	30.8413	24.5691	36.9116	25.4898	23.9157	26.707	45.2239	34.1562	22.9548	31.1526	26.4715	30.7345	26.7989	25.0809	22.3489	33.2238
	356	23.6533	29.3123	26.3587	26.8404	28.8239	26.8735	22.7263	41.0127	26.0202	26.2472	26.195	46.5663	35.4148	22.1922	29.4305	28.8429	31.6188	27.241	24.488	23.0683	36.4949
	358	22.4732	25.1776	25.2089	24.9395	27.8666	29.4371	24.5777	35.1732	25.4565	22.5665	25.8527	46.8162	34.8412	23.3723	31.0734	27.7655	31.1253	25.9954	24.6335	25.2042	37.7961
	360	28.7401	24.789	23.3835	29.5885	28.2663	26.7302	24.4901	39.285	27.3999	27.3994	24.8305	46.9212	34.5615	24.2862	32.2709	23.2604	31.9367	26.7539	22.4489	24.6695	36.1163
	362	25.089	26.5968	22.5926	23.4418	26.6817	28.3637	25.5678	30.5914	24.9504	23.1322	26.5394	41.3597	33.8344	25.6252	30.1047	28.2409	30.0889	27.9818	24.9139	23.6584	36.7726
	364	23.9427	27.4203	20.7027	26.2094	24.4374	28.0074	23.2739	34.6214	27.7815	23.4746	24.5028	40.8568	30.8374	21.3838	30.3828	26.2323	30.2922	29.357	23.2595	23.6058	32.1003
	366	21.5202	25.9827	23.1055	25.0858	25.6249	29.1303	23.7432	35.6614	25.329	24.5104	25.1335	45.6729	34.6898	22.2216	29.9003	25.0943	28.4095	27.5937	22.6713	25.6235	33.6369
	368	24.4317	26.4003	24.9006	24.7778	28.7767	29.472	23.087	33.9525	26.8644	25.6716	23.8174	43.7308	33.7859	23.31	33.3848	28.8003	27.6988	25.0849	21.2269	22.1104	34.5156
	370	27.599	24.8141	25.5688	24.0948	28.1659	28.1144	22.4753	35.5888	26.4495	26.6374	25.431	44.909	33.1923	23.5636	28.3942	27.4605	25.3502	27.9469	23.8448	25.0023	34.3772
	372	24.2979	26.2319	24.3456	24.0114	24.7141	28.1129	23.1371	36.6012	25.6832	23.5363	24.9934	40.2477	35.8733	23.344	29.6468	27.4668	33.6522	27.027	23.401	23.9454	36.7073
	374	24.2736	25.1543	25.0772	24.9419	26.3758	27.9745	24.5723	31.686	25.3579	24.6289	22.5592	43.9369	36.6451	22.7514	31.2827	23.3919	27.8991	27.3976	25.4765	24.3333	39.7292
	376	23.6692	30.9186	24.6685	27.2282	24.3062	25.0739	24.2333	29.2621	25.6345	23.5768	23.3278	43.8575	35.0338	20.9292	29.3407	24.8334	29.1183	24.8646	23.8936	22.7186	36.836
	378	24.4148	27.8785	24.5475	25.7429	26.5161	26.8128	21.9583	33.2483	23.723	24.1434	26.314	41.6428	33.3778	22.2701	29.8969	28.6511	27.6856	26.411	23.4397	21.4238	36.4471
	380	23.056	24.9348	21.5645	27.0541	25.8661	25.7127	23.6263	31.8946	27.5257	24.2149	23.9384	41.1698	33.6543	21.6065	27.6236	27.6661	30.4159	24.7964	22.4414	25.9259	39.0664
	382	25.868	26.4966	23.6535	25.6301	27.1101	25.2079	24.468	33.524	25.3211	25.0771	26.2316	41.7667	34.5612	22.2166	31.5503	27.1911	29.0718	25.1643	23.1915	22.4643	35.4662
	384	27.1362	24.6891	24.9718	27.1883	25.2891	28.266	24.6342	34.7491	26.7775	23.3212	26.1152	43.6362	36.3319	21.6734	31.224	25.3333	30.3796	24.8528	23.0997	22.9236	36.9542
	386	25.9667	24.6949	23.7596	21.9056	24.6421	28.8423	25.7822	36.534	26.827	25.3032	27.2664	42.7183	33.4274	22.3242	27.5581	28.1695	27.7397	27.6012	23.9726	22.6924	35.331
	388	24.3821	25.4882	22.7967	28.1442	23.7829	25.207	24.0378	31.4355	25.3183	25.3312	23.9829	43.314	33.3492	20.654	28.3287	27.8754	25.6124	23.9435	21.9088	21.7826	38.0774
	390	22.4322	26.8053	22.95	22.9663	26.3348	29.2578	21.2256	34.0826	22.5804	25.0596	25.5733	41.9747	37.0675	22.2427	30.9404	26.8765	27.2859	26.7287	21.0751	25.4239	37.9379
	392	22.5606	24.1278	22.4754	24.1428	22.8967	26.378	24.455	27.3413	24.3989	21.5006	22.1761	41.9104	32.1956	21.9342	26.6788	24.6342	23.6638	24.2284	22.0231	21.8586	34.309
	394	22.7177	29.1067	21.949	24.4471	26.4576	28.1856	25.4436	34.1045	27.8175	26.3107	24.7315	38.2373	33.9345	21.9519	30.769	27.1025	31.7762	28.6805	25.3681	26.7655	37.8944
	396	25.3453	24.4278	21.7134	22.9409	23.449	27.8133	21.785	30.2548	25.144	25.036	21.8118	38.7654	32.3495	22.6618	28.6985	24.7456	26.454	26.0212	24.484	24.9192	35.493
	398	23.0473	26.3506	25.406	27.1623	23.7027	29.7463	23.0957	31.501	25.4307	23.9826	26.1429	42.3333	38.2413	23.4439	30.7004	27.9094	27.8236	27.8477	23.4185	24.7971	39.8672
	400	22.7284	24.4772	24.5225	25.7846	24.381	26.6176	24.4357	31.9134	22.519	26.5608	22.5791	42.7001	34.41	21.8266	28.4952	24.848	31.0953	24.1246	22.8302	24.5547	34.5133
	402	24.7231	25.2072	24.2913	25.5856	22.7142	26.0818	22.5668	30.6493	23.1384	23.3268	25.9411	40.0748	33.4019	22.6114	29.4866	28.1124	30.1155	23.4488	22.9811	22.3287	39.2888
	404	23.3015	28.6423	23.3664	24.2217	26.1752	28.1851	22.4772	32.9708	23.0002	23.5096	24.5759	39.6756	33.7917	21.3358	26.728	25.5519	29.188	25.1013	23.0241	20.833	34.8629
	406	24.701	27.6344	25.9948	25.1057	23.7641	27.277	22.5724	33.5953	23.1766	23.5608	23.995	40.6809	34.2401	21.0439	30.6061	31.1641	29.4827	24.3102	22.5007	20.9871	37.2971
	408	23.9486	25.2545	22.1445	25.9383	25.2322	24.0008	21.8416	31.5493	23.219	25.4329	23.907	38.2586	33.2144	21.2737	29.2492	25.2003	29.2685	26.336	24.083	21.5865	33.5903
	410	25.0892	24.8191	22.4434	24.1397	25.894	25.2992	22.3877	31.9445	22.8788	22.3528	23.9704	37.1736	33.4887	21.1896	26.4714	26.8656	29.9038	27.1163	23.6146	22.229	33.6097
	412	20.4817	24.2653	23.4125	24.4731	28.572	24.6899	23.1823	28.7308	25.3285	22.3687	24.932	39.1916	32.6322	20.5269	30.4187	24.6478	26.5724	25.4444	21.6192	20.9625	33.0174
	414	20.9867	25.0814	24.8834	22.3555	26.6656	26.8151	22.9118	33.9842	23.4893	24.8554	25.042	41.5046	32.448	21.9958	28.8791	26.2282	29.9941	25.5388	23.5866	23.0816	35.0635
	416	23.668	27.7537	22.4625	23.3688	23.4106	25.0512	23.712	30.3399	23.4134	26.1285	22.5107	39.0963	32.5108	22.674	26.6271	27.4255	28.6624	23.9928	21.9304	21.5434	36.9307
	418	21.8511	28.1051	21.5109	26.8036	25.6579	25.8518	19.5703	30.1353	20.8671	26.0139	23.5383	39.0932	28.5606	21.6	28.7024	22.8761	32.4375	24.3586	24.7561	21.952	35.6736
	420	22.7319	24.8475	21.9188	23.3713	24.8726	24.4691	23.23	27.472	23.6776	24.1101	22.8396	41.1078	27.1233	21.783	26.3021	27.6179	33.4512	23.5149	22.5908	22.342	33.0804
	422	22.9801	25.5819	22.3625	25.1792	22.7254	25.5912	24.9114	29.0095	23.0572	22.8324	23.042	39.0816	30.5629	19.8803	26.3584	24.3305	25.1553	22.3492	20.2348	21.4689	33.5356
	424	20.1863	22.7546	21.9026	22.2621	22.7682	26.0598	20.0718	28.4713	25.0406	22.6163	22.9985	37.8087	32.0149	21.615	28.1621	20.8252	30.7631	22.8442	21.0021	20.5195	28.4766
	426	22.0754	26.1828	20.7222	24.3462	23.5131	26.3207	21.3288	27.7591	23.6076	22.5686	25.2446	39.2538	32.9116	21.6946	26.8922	29.3829	29.9838	24.0657	23.4795	22.9493	34.1917
	428	23.9373	24.924	23.6261	24.9798	25.7196	29.9372	24.1272	33.6705	26.2299	25.4667	25.3021	43.7065	32.9297	21.8366	28.34	23.9659	32.7376	24.5332	25.2676	25.5748	37.9431
	430	36.4189	31.6268	28.0881	31.1478	33.2687	41.0661	29.8831	40.5864	27.5508	31.5898	30.4189	48.9919	44.1741	24.1638	37.1466	31.0269	38.4368	31.7833	27.4277	27.2938	49.131
	432	47.3747	34.833	28.3979	36.1089	32.7784	51.4159	29.428	46.716	32.4545	38.4372	32.2393	57.5663	49.1848	26.3279	39.8519	31.3855	56.2879	40.0999	31.2082	26.8757	67.4698
	434	69.614	39.5539	32.2797	36.4777	35.1591	68.9137	37.9501	55.1523	38.9478	48.6154	42.5191	68.9883	62.3107	27.173	46.5283	32.3654	71.3806	48.7284	36.0569	34.1796	94.8278
	436	91.9044	54.118	30.4521	43.7902	43.1931	82.9885	41.6639	59.3383	43.0167	53.2535	41.1638	81.208	69.911	29.6513	51.5279	35.5926	83.7946	54.9999	39.5066	32.7097	105.266
	438	108.327	53.7023	37.8023	42.5336	54.0467	92.1437	38.4734	66.0879	43.8847	57.5165	45.1228	87.6707	82.6912	31.084	60.7012	42.5203	125.773	62.3402	45.4265	38.4452	124.338
	440	123.139	61.0714	40.0789	45.8439	49.9679	106.797	51.9249	73.3178	51.6344	61.7933	50.1851	97.0199	99.9779	32.5092	73.1177	40.8269	137.054	73.3583	49.1488	38.6121	154.261
	442	131.372	64.3575	43.8759	52.4696	59.3676	111.25	58.2976	80.5905	44.5271	70.1508	52.765	121.527	105.437	37.3835	69.2454	40.8015	150.767	79.4236	50.0401	42.3858	183.047
	444	142.941	78.0547	45.5692	50.2276	60.5535	119.035	51.0727	84.3034	51.3337	92.1342	59.7929	120.321	113.776	37.5941	83.4299	47.284	166.225	90.3374	60.7888	40.2296	175.677
	446	159.231	74.3227	44.2235	56.1004	70.4218	130.609	59.9303	91.1742	54.2504	98.5193	61.6417	134.185	122.697	41.2031	85.8652	54.6816	190.279	101.39	61.9654	44.2428	217.999
	448	180.899	88.8705	49.0233	55.6029	68.0963	154.66	59.8144	113.019	56.599	89.9706	69.3392	149.851	140.478	41.0775	92.5959	52.2953	244.413	107.978	67.1778	50.2085	229.36
	450	177.848	106.086	52.203	63.0412	74.4379	153.499	67.2425	106.656	64.5672	106.721	75.7188	143.599	143.382	43.03	106.909	44.4084	245.257	124.978	65.7563	56.2008	231.311
	452	207.258	92.461	52.0006	61.8469	75.0819	174.296	67.0427	108.784	63.4922	107.324	82.9243	155.444	172.028	47.9564	109.668	44.3544	283.678	134.884	66.8327	51.0269	257.305
	454	208.722	90.4547	57.6089	68.2572	80.042	175.553	72.2497	110.605	67.184	98.8184	76.444	172.164	165.367	44.6123	106.743	48.8253	302.379	128.256	75.0595	57.0874	264.509
	456	235.381	107.688	61.431	66.7611	79.3027	181.326	69.8989	111.813	57.6779	119.515	84.6305	176.79	185.165	48.5163	117.523	45.8088	317.657	140.872	75.7988	55.4541	283.232
	458	217.559	113.644	68.9065	69.1979	80.3823	194.997	68.8024	118.544	67.2406	112.782	91.0773	182.834	207.705	51.2314	119.616	52.7594	347.158	143.58	73.2262	49.7382	323.884
	460	242.65	106.18	59.3088	73.1172	90.284	186.551	78.2779	135.356	64.5462	118.788	99.4166	219.383	228.164	54.82	137.213	60.4802	300.077	163.986	90.9048	58.4176	315.035
	462	233.679	116.896	62.8021	68.8974	93.4433	198.206	71.6534	125.921	67.4641	117.159	97.2956	207.894	211.474	52.6014	131.033	61.2838	312.859	150.985	87.2993	66.7082	331.539
	464	228.089	113.455	72.0852	83.8866	96.3859	188.803	87.6481	140.022	78.9698	114.148	107.902	227.533	224.816	59.808	131.965	59.0352	344.816	163.782	90.4281	67.9269	385.56
	466	242.234	111.324	62.7682	72.3297	89.361	181.386	80.1571	144.975	81.4449	126.114	107.388	252.164	229.676	55.7143	118.283	59.2147	357.731	172.266	86.3208	66.0858	319.932
	468	239.924	130.839	76.1656	80.5619	92.4099	193.011	86.1629	150.21	70.0717	123.061	112.349	240.212	236.364	62.3277	145.417	55.9062	343.88	170.586	97.8419	72.769	378.171
	470	275.653	121.271	74.7627	74.922	95.8824	184.06	91.14	150.41	69.313	124.594	109.191	244.744	238.063	64.9729	133.897	57.589	401.315	173.911	88.2942	79.065	412.244
	472	229.788	120.979	75.7037	81.3739	98.1333	196.339	87.386	155.912	75.0679	137.296	118.451	269.251	262.13	70.2504	134.642	62.4151	415.19	198.463	91.2581	73.2542	425.909
	474	262.639	122.12	71.1742	93.6218	102.718	190.233	80.6551	150.427	76.9892	115.867	116.941	286.755	257.336	71.3358	151.558	62.5359	368.968	187.904	88.9472	71.1407	390.332
	476	225.828	119.633	76.6364	82.2483	111.108	206.125	99.2298	159.264	82.0309	148.485	116.096	323.801	263.994	75.8005	149.332	55.2957	409.949	201.409	92.0055	76.951	372.348
	478	246.297	129.636	86.4357	82.3477	99.9908	204.422	94.1052	175.37	79.4675	142.801	124.372	315.476	264.254	76.6002	155.409	69.4672	448.229	198.619	92.4919	77.6505	402.093
	480	248.365	152.144	82.0554	81.949	116.357	224.128	104.45	170.784	80.9758	142.48	134.719	343.046	280.336	78.4667	177.856	73.248	383.601	209.368	100.626	85.9081	395.167
	482	256.142	119.127	80.5536	97.4812	107.021	200.253	97.2536	206.291	74.553	136.017	132.081	335.257	290.053	80.5813	160.853	67.3288	384.188	228.921	109.245	85.1399	347.106
	484	239.877	139.168	95.5928	94.52	96.8803	195.806	93.9307	180.6	86.2916	128.381	138.766	356.665	258.143	79.6025	186.155	65.6943	395.77	222.495	101.938	81.387	391.569
	486	256.164	133.461	87.1062	78.5265	121.624	215.192	98.4259	165.311	87.2013	130.175	132.285	368.804	284.588	81.7936	160.879	76.726	335.449	245.32	102.484	94.5553	343.114
	488	232.172	146.131	90.6252	86.7164	108.105	212.452	102.873	176.498	85.128	145.302	151.387	404.726	262.567	80.2906	181.267	58.3156	359.476	232.552	96.3922	89.3807	373.334
	490	257.913	139.736	83.2472	82.1384	110.741	203.216	117.097	199.417	80.8412	144.224	150.877	409.856	282.45	87.082	159.634	64.5362	352.853	240.501	99.8368	76.7876	400.312
	492	222.664	149.576	89.6954	96.5829	114.017	191.271	101.549	172.054	89.1514	122.555	151.578	424.98	285.779	95.784	172.853	87.6282	322.582	233.574	100.77	92.5786	381.745
	494	244.796	155.233	92.758	90.5358	103.39	213.12	117.296	188.762	87.3904	133.256	153.484	425.58	247.795	91.9134	179.317	61.3921	321.555	260.629	97.7948	86.7514	371.254
	496	256.929	148.562	93.897	91.5484	114.496	218.572	110.367	178.439	79.3899	131.226	151.266	439.093	291.846	98.7634	185.447	73.3613	335.501	272.061	102.244	96.58	360.467
	498	225.771	136.543	89.7571	85.1006	117.027	205.645	125.435	190.506	94.9907	129.668	166.89	519.342	300.403	95.5294	186.811	62.9286	370.227	298.762	105.147	95.0092	342.762
	500	217.723	130.93	79.8806	92.3782	119.856	198.733	121.121	188.853	91.0105	135.057	162.473	489.271	273.58	99.8825	185.513	78.1531	436.54	259.953	109.167	86.9266	380.897
	502	231.085	139.858	93.5109	92.5918	120.92	213.873	115.811	214.295	98.6394	131.973	166.183	460.075	290.871	98.5033	177.912	69.4187	371.999	276.453	96.7893	97.295	375.312
	504	222.078	133.689	103.603	92.2511	112.637	190.503	110.082	201.002	89.3375	126.998	176.111	511.769	269.706	95.7134	185.59	78.9746	330.623	265.756	107.081	92.9849	332.986
	506	271.476	149.979	102.866	99.257	138.325	225.2	143.309	197.561	99.0392	138.958	195.844	531.481	323.089	112.615	195.14	77.4277	365.088	255.394	107.117	92.6669	358.334
	508	228.993	124.645	102.271	97.1764	120.047	201.388	127.234	186.892	81.7175	120.509	174.916	524.115	258.445	103.204	197.804	62.9086	388.058	268.513	113.278	87.8363	345.014
	510	241.932	126.939	112.309	94.6569	124.245	192.968	131.339	192.446	92.6018	141.704	188.672	602.712	276.191	101.986	178.706	76.7338	398.199	266.026	111.583	109.164	341.073
	512	216.096	125.242	117.907	93	111.942	189.05	128.48	209.617	91.3679	125.619	191.931	498.6	237.791	104.553	186.202	71.3319	355.048	298.599	110.68	94.1588	325.01
	514	240.617	129.914	98.2728	89.8956	113.67	187.747	134.748	198.196	99.3467	113.736	213.482	541.638	268.19	113.4	191.242	67.2687	332.093	266.079	112.009	83.7528	330.825
	516	190.963	127.874	98.8987	93.5814	110.089	196.292	133.653	205.048	93.197	134.734	214.028	532.509	250.891	106.424	203.313	65.1502	373.772	266.552	111.89	88.9057	349.882
	518	260.336	142.378	98.2835	94.7485	120.274	219.093	138.16	231.512	108.804	135.021	219.524	579.91	274.409	117.731	205.073	77.9093	367.258	302.767	116.21	109.108	336.795
	520	234.153	134.584	120.086	97.5144	126.68	200.052	125.322	221.169	88.17	121.012	215.53	574.902	268.43	118.568	199.705	68.2288	337.682	279.128	115.995	101.575	322.612
	522	251.817	132.511	104.404	95.4855	121.023	217.132	126.704	235.779	98.5083	120.697	238.212	608.611	277.864	122.825	203.61	83.9625	316.053	300.896	118.908	115.395	320.321
	524	225.389	125.427	117.362	86.6607	129.804	197.468	128.345	209.94	78.5093	126.431	245.387	613.433	272.984	122.601	197.589	76.8689	424.374	255.749	113.397	89.3943	332.344
	526	218.503	125.122	110.184	97.1778	124.166	187.078	129.268	225.2	90.7206	126.78	251.477	619.36	253.976	125.345	166.511	71.2204	302.474	281.799	116.013	101.641	315.716
	528	228.232	136.016	98.3734	88.1418	119.828	185.752	127.527	231.681	81.3612	109.711	232.418	598.985	260.072	126.166	187.063	71.386	336.122	270.474	119.53	100.009	307.974
	530	254.018	124.963	105.862	94.0829	134.644	185.758	134.924	238.056	80.7471	116.655	279.564	630.74	251.911	136.067	194.273	85.4833	408.663	297.017	124.028	107.499	320.97
	532	217.999	146.336	105.596	104.935	135.376	207.467	127.411	249.829	83.6044	113.422	274.984	561.313	258.557	134.548	198.499	78.4358	290.758	307.616	120.088	95.7857	364.204
	534	202.951	135.635	112.368	105.482	131.645	174.955	151.324	248.648	96.8302	127.159	278.09	649.191	245.184	134.026	194.53	87.992	313.201	294.292	130.49	109.751	348.277
	536	213.26	143.422	112.945	102.673	129.57	188.823	140.565	253.571	85.5768	114.994	285.712	631.924	235.72	128.114	214.23	80.603	331.762	289.98	115.888	108.77	307.722
	538	228.794	131.78	114.166	102.264	136.684	176.086	139.077	249.9	88.1254	131.051	305.732	707.614	247.863	134.113	192.79	78.3809	317.931	282.825	116.604	101.573	332.983
	540	229.404	128	113.315	90.7767	133.282	198.753	129.979	283.75	97.0394	116.562	300.91	709.316	235.659	127.575	195.959	67.1737	321.189	287.641	133.198	118.201	320.093
	542	214.713	123.805	109.979	90.3937	136.914	189.224	135.689	270.128	85.5776	130.405	285.589	708.564	220.098	142.471	205.556	86.3788	264.811	299.21	124.247	119.266	329.526
	544	199.025	135.765	100.434	97.7356	120.381	179.402	144.277	283.223	86.6617	121.746	301.346	684.553	210.719	132.609	192.638	83.4798	298.205	287.667	125.013	120.805	332.166
	546	204.163	138.371	100.74	101.532	127.54	173.473	130.932	281.966	86.3526	120.567	322.905	648.839	239.144	136.81	205.615	94.6839	301.911	311.749	122.939	116.077	289.376
	548	196.726	131.122	114.519	98.1487	123.312	183.333	129.852	328.997	85.7411	134.607	292.555	634.582	233.31	143.648	177.981	76.453	270.795	291.464	134.369	105.064	352.957
	550	216.06	136.465	110.518	111.01	132.352	183.96	146.826	316.665	100.254	119.281	317.094	641.948	223.532	153.764	185.307	72.9034	356.86	287.456	127.206	111.949	313.317
	552	191.901	125.389	102.747	100.994	133.682	181.563	132.33	307.167	105.223	109.209	305.233	646.418	213.872	153.064	193.356	64.1861	288.29	271.971	127.162	104.741	326.104
	554	212.985	139.497	117.665	100.964	139.058	180.573	148.215	364.168	99.3699	116.667	331.46	736.455	217.396	145.473	193.833	80.0802	315.652	328.32	124.377	132.561	359.355
	556	193.707	138.925	102.342	103.865	127.193	171.662	151.533	379.061	98.4437	108.751	299.901	669.521	199.097	146.883	201.679	72.1081	335.937	277.869	128.298	111.537	298.942
	558	194.955	133.571	104.848	93.2196	116.844	192.04	147.764	322.94	98.1897	104.123	297.8	682.1	207.185	144.946	207.115	72.8171	309.99	302.428	129.825	109.243	312.045
	560	184.214	132.308	98.6183	89.8327	128.45	171.531	141.545	402.188	98.626	113.527	323.882	788.35	210.492	144.359	190.968	74.7976	277.337	279.984	121.291	108.017	322.356
	562	223.228	135.927	94.6315	100.6	143.112	180.293	134.842	369.61	90.302	111.392	342.94	730.896	243.538	152.546	206.36	75.063	333.685	296.67	135.562	113.758	277.075
	564	206.763	123.147	103.78	103.721	115.444	169.422	166.584	411.938	92.5804	117.654	348.293	735.102	210.883	148.569	221.769	72.1461	266.095	268.101	130.732	121.2	296.848
	566	196.026	128.944	102.133	100.947	141.09	188.437	141.537	386.497	92.4999	109.117	335.112	743.069	218.844	155.475	168.983	63.829	327.749	274.319	118.392	121.926	302.329
	568	190.946	124.412	97.2244	98.4942	124.208	176.603	142.093	415.44	84.8397	117.264	326.603	715.539	197.216	148.974	191.748	76.6609	252.858	274.606	128.61	99.3175	278.99
	570	210.656	133.643	98.0854	101.043	124.618	168.39	151.873	408.798	95.3094	114.974	322.937	726.887	192.429	156.396	206.026	84.2216	301.511	285.988	131.92	124.05	297.844
	572	185.354	122.134	99.3325	103.873	122.974	177.755	137.159	385.901	82.3643	100.587	318.487	685.547	198.851	156.559	192.089	67.0357	265.784	276.708	132.385	114.856	303.245
	574	223.247	120.226	98.7545	99.4873	120.08	178.242	131.675	393.166	83.102	111.411	320.192	701.72	190.152	156.8	195.693	72.1823	270.212	269.066	122.551	102.246	302.386
	576	172.628	114.719	104.834	108.769	130.847	173.135	135.222	411.755	84.6737	115.448	310.677	703.91	201.076	155.79	187.864	60.6876	279.025	289.784	129.61	115.697	283.111
	578	174.342	125.012	105.558	105.902	130.777	165.476	138.739	483.04	99.8912	120.755	318.282	770.481	215.493	159.423	179.587	61.7539	263.803	292.424	124.201	120.529	274.716
	580	182.246	120.419	105.949	101.044	134.417	177.949	145.784	372.2	85.6032	106.351	358.172	690.392	193.145	164.486	197.78	73.5249	272.599	291.333	107.355	111.573	288.399
	582	172.74	133.351	106.588	93.2807	132.229	162.695	146.646	419.546	82.0235	107.26	337.83	775.605	189.423	169.127	181.479	68.0017	331.245	295.075	127.633	122.507	284.367
	584	212.597	133.776	93.1044	90.3845	128.195	158.076	123.486	428.093	101.655	101.153	348.753	745.972	170.876	166.081	177.012	64.8419	253.962	271.032	132.252	113.343	273.136
	586	174.921	129.636	88.4432	88.8245	117.501	170.754	140.448	406.516	90.0936	105.989	313.31	689.979	167.221	162.983	176.873	66.4375	233.871	261.337	115.349	108.39	272.098
	588	183.549	125.714	94.3451	108.538	137.947	157.948	146.582	434.01	92.9347	111.432	306.738	682.782	166.784	165.854	196.924	66.2022	284.738	293.131	129.869	104.883	291.089
	590	162.725	141.375	102.371	101.204	126.193	162.478	135.989	436.463	89.8711	101.372	298.79	760.34	181.029	154.475	190.043	67.8972	249.638	302.386	118.075	115.772	296.086
	592	174.9	111.866	97.0817	103.094	136.615	154.617	136.2	430.699	93.1453	101.072	295.904	713.953	164.473	158.318	163.415	61.3988	235.528	286.423	124.852	99.1965	340.985
	594	162.104	110.844	90.6585	92.2617	134.497	181.515	127.858	382.38	91.9112	121.859	295.621	708.664	162.332	158.244	180.833	71.6458	245.787	267.338	112.417	101.953	309.712
	596	188.824	118.314	90.4993	92.1713	135.858	171.638	135.159	423.889	80.5814	109.743	300.85	727.729	164.979	158.634	183.075	58.7375	240.718	267.78	121.827	102.534	314.204
	598	169.341	127.018	90.1753	104.196	119.555	181.416	142.309	400.424	86.9899	90.5263	276.057	651.796	170.355	144.31	173.556	56.0372	236.758	272.437	115.421	106.592	291.615
	600	178.74	124.828	85.3064	106.188	127.265	174.879	124.804	407.544	87.2873	98.601	278.907	640.255	155.63	149.147	169.035	65.8525	228.178	264.63	106.145	97.3718	245.801
	602	188.393	121.732	88.7191	88.8483	133.431	180.961	118.863	389.778	73.9221	98.216	297.531	667.994	155.541	153.362	193.474	57.993	231.941	245.686	111.629	100.017	257.947
	604	184.177	119.973	98.1348	109.405	145.025	161.363	134.706	407.401	85.5136	116.201	306.048	662.36	168.641	160.354	181.042	66.0787	227.722	285.868	116.344	115.981	274.712
	606	152.956	127.676	94.3014	104.829	127.554	157.482	124.266	404.832	79.1611	98.0477	276.519	708.292	148.891	154.745	169.211	66.1108	204.862	248.993	106.726	100.503	287.004
	608	183.229	135.623	107.725	95.0024	133.534	145.679	135.669	392.342	77.2682	106.119	294.752	685.061	165.223	163.991	175.902	60.9067	250.846	262.094	120.387	110.204	249.071
	610	175.026	129.094	100.099	101.312	134.541	159.676	138.95	386.852	90.8511	106.843	291.923	646.913	140.988	156.111	187.801	62.1254	255.251	258.236	101.92	111.535	288.927
	612	186.873	114.11	98.5122	97.7233	120.709	151.517	130.149	364.653	89.2849	102.157	251.264	710.209	157.938	146.824	158.314	59.7492	222.635	242.679	108.791	96.3804	277.226
	614	175.426	147.02	101.161	110.038	135.081	159.751	133.808	382.445	102.712	106.99	271.101	670.892	165.851	152.85	186.148	65.8403	238.923	279.614	105.148	103.234	291.067
	616	179.245	110.89	92.1986	88.4956	123.97	168.651	127.946	370.324	94.1275	102.44	260.272	625.608	144.475	143.06	160.413	61.2349	252.535	259.684	111.44	95.8695	247.444
	618	183.481	124.024	92.9489	100.015	130.763	164.026	128.783	367.254	85.9586	96.5944	257.938	650.603	151.546	163.407	193.301	59.5403	234.176	282.475	100.532	93.8963	251.61
	620	197.261	104.604	104.511	93.7036	137.406	168.927	135.917	349.123	94.8757	113.698	268.261	657.298	146.041	153.098	173.536	65.7932	231.183	255.025	103.451	112.631	246.075
	622	190.655	118.523	106.55	89.504	116.892	156.811	147.774	354.267	88.8598	99.5382	280.122	633.769	160.975	159.243	175.301	54.8363	207.412	266.98	109.511	103.051	230.746
	624	169.74	117.965	88.9543	91.4706	136.247	164.811	124.344	362.605	81.3455	95.0817	234.92	618.923	127.01	145.054	161.98	54.8597	254.577	254.698	98.1382	86.1772	260.135
	626	176.074	124.359	95.6289	101.511	123.685	162.777	120.698	310.885	89.8583	102.259	242.666	674.024	150.722	156.738	171.899	61.0401	232.265	243.662	111.972	102.795	246.577
	628	167.879	116.86	90.8576	93.3267	112.651	148.329	125.259	318.04	81.6042	100.572	209.601	625.673	136.927	149.326	149.306	52.2598	213.327	236.905	95.3597	88.1085	267.05
	630	173.063	118.165	91.9126	103.923	125.384	154.712	131.166	354.96	84.4831	102.685	245.37	619.1	155.472	162.389	171.648	67.5881	193.989	236.212	102.324	115.348	249.93
	632	167.588	116.184	96.4373	96.2802	120.022	151.599	117.464	332.148	77.5809	90.2174	211.03	597.202	131.023	155.408	154.882	63.5955	189.194	244.852	96.1779	116.693	226.565
	634	180.021	119.936	103.418	97.3886	127.343	159.184	131.215	334.5	91.2268	98.0203	225.733	602.58	140.113	153.764	165.777	59.8267	235.258	229.094	103.518	105.578	244.714
	636	171.329	125.912	90.1789	92.066	124.759	145.869	122.502	314.903	75.9359	89.0608	218.046	582.092	137.331	142.985	157.262	60.9394	207.217	240.242	98.4443	96.1234	219.123
	638	175.635	121.065	86.2718	100.069	136.647	153.732	141.436	323.51	93.9573	101.277	214.094	562.166	140.997	144.291	164.488	61.4192	202.159	249.945	106.769	103.987	240.66
	640	171.828	116.087	86.5308	100.078	128.749	132.843	131.083	341.352	79.2257	90.9895	205.764	609.363	137.724	148.567	145.109	62.6114	234.504	242.514	102.997	93.9412	241.004
	642	171.683	115.34	105.864	104.946	127.17	149.375	135.176	321.073	79.7905	97.51	202.949	678.306	139.362	159.345	155.265	62.5955	222.885	273.615	101.225	102.777	215.601
	644	159.023	106.909	101.149	100.437	115.15	154.643	121.931	294.29	89.1902	97.1561	181.889	522.077	125.586	151.967	137.459	69.167	210.946	224.806	86.6337	78.2314	216.868
	646	169.005	123.583	82.2681	95.0789	122.286	150.376	134.214	282.571	93.6898	99.4744	222.544	506.753	125.252	162.053	147.571	61.6573	215.61	221.061	99.2239	82.3001	244.452
	648	178.199	116.95	89.0867	100.659	113.426	151.96	116.306	288.827	84.2537	86.4234	185.826	642.005	128.597	157.72	155.342	62.7049	193.34	224.924	101.144	78.9869	247.979
	650	190.444	111.916	87.5529	95.3097	119.984	150.932	131.248	312.28	105.229	88.0785	200.741	561.64	138.978	143.453	178.988	62.8743	198.37	232.578	93.5773	91.568	270.738
IP3R1 shRNA	Time (s)	24.8118	24.7949	31.0439	31.3535	29.8977	21.325	22.6811	24.9829	23.3557	29.1129	25.6316	22.2757	24.6554	21.1953	20.4475	24.908	19.7726	23.7304	26.0678	22.7078	21.3903	23.6905	24.5646	20.8304	17.4855	22.7475	25.6596	24.5405	22.4193
	0	23.739	24.5204	29.7487	31.2581	27.8761	19.8013	23.531	27.2865	23.5575	31.3019	23.4619	22.9582	22.6501	18.2063	20.0982	25.3644	21.9693	21.411	24.708	23.4372	21.6145	20.4382	21.5178	20.4242	17.2147	21.9573	24.7414	25.0797	23.8393
	2	25.3555	22.8943	30.1591	30.4762	27.9999	20.3579	22.383	23.6103	24.016	30.3721	25.2214	24.8818	20.3796	20.126	20.8687	25.518	21.2598	22.1821	26.6771	24.1606	21.1503	22.5653	22.7952	20.1974	17.8093	22.7697	24.6959	24.3421	22.9554
	4	24.108	24.9749	28.7891	31.2057	29.0341	20.1208	22.4342	26.4918	21.8686	31.3107	25.3928	30.9914	22.2979	18.8114	20.451	26.243	22.4559	22.0362	27.2479	21.6321	21.1609	21.1728	22.5041	22.0622	19.5052	24.3445	23.8283	27.6446	23.6885
	6	24.3667	24.9825	29.4835	30.9279	29.3202	20.0898	24.2195	25.5328	24.4088	31.6739	24.6841	26.3434	21.5287	18.1612	19.1729	26.492	21.6078	23.3108	28.2174	22.0998	22.7748	19.4898	22.4251	20.106	20.2473	22.3629	23.4987	24.4388	23.6259
	8	22.8663	24.5079	31.5819	27.779	28.0744	21.2266	21.8873	24.2959	23.4202	30.6858	24.1768	26.4876	21.7376	18.6822	23.4496	23.898	21.1579	22.5153	27.0453	23.95	21.7155	19.5567	22.0215	20.7072	19.8434	23.5107	21.7442	22.6738	22.969
	10	23.8893	22.8387	30.6582	28.1221	28.3413	22.0356	22.3982	24.8878	22.0075	31.6605	24.3203	27.4651	22.3096	17.0864	21.0499	23.3695	20.3907	21.721	27.0291	25.2653	21.3129	24.0846	24.2763	23.7683	18.6908	24.0935	26.3397	22.4922	23.8484
	12	22.4343	24.0703	30.6421	30.038	27.0374	18.45	22.2067	24.889	22.2082	27.8439	23.0881	27.7167	18.834	19.7886	19.3444	21.4193	22	24.2785	26.4817	23.2048	22.106	20.5276	20.1507	19.3067	17.7809	23.6173	25.603	24.4119	21.9466
	14	22.8052	26.182	31.811	31.0548	27.6912	20.2182	23.3459	24.2408	22.8076	31.0018	24.2995	25.1118	23.1568	20.7158	21.2685	26.1733	20.9424	23.1456	24.5676	25.3878	22.3421	23.6846	22.496	19.5181	19.1549	22.0594	25.8646	24.8625	25.1953
	16	34.2726	26.767	29.585	28.8027	32.0262	26.6402	27.3001	44.605	28.6346	28.6983	29.5912	30.721	23.7397	20.5325	23.6059	27.0783	21.4885	22.8925	26.9741	26.1672	19.4964	21.6116	23.3558	23.1254	24.445	25.2178	27.2629	26.3847	23.2322
	18	31.1653	22.6682	29.3196	26.9608	31.3468	23.9151	27.2843	38.9973	31.5729	24.5768	27.1885	25.3858	24.6572	20.8806	21.5276	24.5626	21.6376	23.6096	26.1216	20.5784	22.9991	23.9961	21.5023	21.8899	21.4196	25.2235	24.9955	27.8363	23.0125
	20	31.1915	26.3339	31.2333	25.3855	31.1351	25.5458	28.8242	41.7519	30.1336	27.1654	26.5849	24.378	21.6542	19.0871	21.9937	25.8349	22.2201	23.7352	25.8868	24.4133	21.979	22.4032	20.9899	21.1992	22.1929	23.6664	24.1253	24.3637	22.5141
	22	33.0476	27.0032	26.9085	25.3077	29.8814	27.6484	28.2775	35.8666	27.3077	26.0133	26.7468	26.86	22.2557	20.1053	20.8701	25.9027	21.1862	21.677	24.6597	23.5265	18.8214	21.7658	20.1232	19.4818	21.6734	22.6816	25.3603	25.1563	23.751
	24	31.8589	26.9555	28.746	27.2416	29.9359	24.4837	28.6818	39.7399	28.9854	25.1696	25.9473	27.9239	24.3352	23.4166	20.9792	25.8162	20.2474	22.9321	26.9297	23.3687	22.9124	22.6345	22.5294	20.3534	24.161	22.4344	25.4275	27.1666	24.4532
	26	29.4785	22.4358	27.9401	27.2357	28.152	22.6431	26.718	33.7813	28.6767	24.9957	25.7216	25.3013	23.3997	21.5659	21.0111	25.7506	19.2888	23.4044	25.9561	21.9755	22.6549	22.0593	22.1408	20.3606	20.5496	23.7331	23.6687	26.5044	22.8404
	28	32.3959	26.9898	30.4083	26.1208	30.5478	26.8505	28.7626	35.4867	28.2575	24.5329	26.1718	23.9514	24.4796	19.7125	21.676	24.4831	22.2479	21.8897	23.6247	20.4459	20.8292	19.8542	21.5989	21.3226	21.5761	23.9937	24.2256	25.3987	24.1206
	30	29.7431	25.4247	27.9899	25.1246	30.8537	24.9727	26.8805	38.3187	27.1968	26.272	27.4722	26.6391	22.3344	20.5677	21.2276	25.8876	22.282	20.656	23.7671	22.5743	22.6735	22.2074	20.788	17.9727	21.7891	25.0733	24.5438	25.7472	21.6597
	32	30.77	24.0006	30.4261	25.9128	29.8553	23.0568	26.2046	36.2181	28.1396	25.0947	25.9492	29.7737	25.6981	18.7676	22.2766	23.9423	20.035	24.2091	24.1774	22.651	22.3103	21.4584	21.6413	20.2388	22.3398	22.7015	22.5899	21.199	24.2458
	34	30.1581	25.3333	30.5464	26.1162	30.421	22.2514	27.6895	32.2717	27.102	24.7214	25.9755	26.3862	23.0198	20.7946	20.887	24.6764	19.853	20.8777	23.2215	25.8324	22.2331	22.5043	25.6101	20.831	23.1698	23.2792	24.0776	21.756	22.0706
	36	32.3456	26.3483	28.1237	27.8534	27.0926	22.632	27.6228	34.9989	26.565	26.921	26.1403	28.4684	22.5541	19.6066	21.6406	24.0338	22.0293	21.531	25.326	19.3197	21.6822	21.1326	22.0176	20.4274	23.9352	23.6575	24.909	28.7836	21.6357
	38	30.6101	23.3769	28.5532	26.7728	28.867	24.6809	27.2257	35.1513	30.887	25.4835	26.0998	30.1914	26.8432	19.7213	22.9251	24.2163	21.1893	21.5891	24.7007	24.9767	22.3374	21.3046	23.8458	21.2873	23.6816	22.9674	25.1243	23.4306	21.8802
	40	31.4298	25.8065	29.9746	26.595	30.4669	22.575	30.5495	33.1245	27.9628	26.4999	29.2932	24.609	21.6229	18.9371	21.7114	24.925	21.5367	23.4988	24.3705	22.0876	20.5093	21.7672	22.9002	20.3493	24.3523	22.7839	24.1922	26.3808	22.5733
	42	31.7894	24.0001	28.9508	27.7408	29.5666	26.0277	26.6978	35.5073	30.793	24.6147	23.9252	27.8206	22.4514	21.0143	22.0752	26.4967	20.9985	23.8097	23.0319	20.4992	21.9281	21.4202	20.0008	19.5962	24.7261	22.905	24.1516	29.5818	21.6453
	44	33.9312	26.6713	29.1229	26.0449	30.4201	28.6291	27.8352	40.0539	29.0985	27.7617	27.4865	26.4349	21.7744	18.3913	20.5002	24.5903	21.648	22.1252	23.0635	24.0365	22.3379	21.3078	22.1429	19.4038	21.1116	23.4484	24.5818	22.3751	21.8901
	46	29.3891	25.8892	26.7123	24.0338	30.5204	21.6493	27.7588	34.2199	27.3035	22.6391	24.8844	28.2482	25.822	21.629	21.0187	26.1195	21.7733	21.0439	23.8302	24.5657	21.9678	20.0956	21.9839	21.3754	21.2908	23.5189	22.9203	25.5979	20.4342
	48	33.5714	25.0679	29.401	28.0025	30.7844	27.3193	28.9434	39.5747	32.0159	27.6134	29.0214	24.9368	24.4467	19.9894	20.8686	23.0945	23.5257	22.8843	22.6838	24.6439	21.0726	20.1403	21.8846	19.9211	21.3304	22.8737	24.4621	26.5064	22.2284
	50	32.9134	26.0383	29.5622	27.9474	33.8602	29.1796	27.8303	34.8081	32.7442	26.1314	24.8246	30.5509	24.1222	21.7312	22.7604	25.7	20.8006	21.8293	23.5605	25.995	22.3419	24.1848	23.9314	21.8645	22.0624	24.134	24.7426	26.9193	21.83
	52	34.5867	28.0975	30.7158	31.1483	29.5676	27.2653	26.5251	41.3992	28.2127	28.2924	28.2615	29.1503	23.163	20.0254	23.0881	25.4789	21.531	22.5886	23.1445	28.0243	21.5598	23.57	21.5068	21.463	22.8967	22.4595	24.4773	26.1515	22.1777
	54	32.8146	26.7134	30.8491	29.1763	30.9059	27.2862	26.4776	34.1066	28.4707	29.3625	24.6602	29.6876	24.6278	21.6727	22.4999	29.5494	24.3823	25.2281	24.1068	29.6573	26.2074	19.6953	23.0694	22.1581	23.3215	24.102	24.1124	30.6304	23.3322
	56	32.6209	25.6531	30.0863	28.4749	31.8921	28.3673	28.9021	32.1171	27.5035	25.8463	28.1011	32.997	29.0579	24.3056	23.6483	26.6987	22.3009	25.2857	25.8863	33.4523	25.47	22.5617	27.3561	23.5466	24.6993	24.6197	27.8648	34.6677	22.7434
	58	33.9126	28.4205	32.4229	28.6026	32.4188	31.1307	32.1481	33.7511	30.7285	28.5656	28.6676	41.0833	30.0164	24.3223	24.8329	28.2945	23.5134	29.0289	24.7586	31.3393	25.9605	22.9681	22.3035	23.0444	25.5353	25.0334	27.4316	33.0721	24.6829
	60	37.1398	28.3828	34.2098	29.3845	29.4904	28.2655	28.2988	35.2758	32.5095	26.464	28.9972	43.9324	31.0502	22.7348	25.7054	29.3359	22.9242	29.4849	26.4275	32.963	27.4205	28.7162	27.2853	23.6197	25.9142	26.159	27.0344	38.2214	27.9791
	62	34.4746	24.6779	31.6775	30.9281	31.7214	30.7461	33.1252	37.5871	29.6031	27.3632	27.8286	41.7897	35.2771	25.6368	27.3366	29.264	25.7596	28.4506	27.1276	43.1366	29.259	24.8052	27.662	24.1533	30.0769	25.7599	29.8249	32.8321	26.4636
	64	40.5747	30.9798	32.5994	32.8357	34.3275	31.5366	32.5063	43.1263	32.6794	28.7166	28.7232	44.8563	34.1267	23.9024	28.0635	31.0693	25.354	30.4379	29.051	40.4154	30.1125	27.3976	27.1082	24.4838	26.787	27.9982	28.2401	37.3995	26.8896
	66	37.7743	31.6804	35.7448	31.4475	36.4211	28.2237	33.3788	35.5604	29.2186	34.0689	30.0013	45.8269	35.0313	26.2393	28.744	31.9312	26.3499	34.5738	27.5786	42.0929	27.758	24.2845	26.647	26.7286	28.2388	27.8398	30.7173	40.7916	27.5779
	68	36.9491	29.6187	36.4684	30.7107	38.1629	31.1552	37.6817	38.9217	32.7292	29.2366	29.6833	49.8159	35.1866	24.9615	26.5313	33.3137	27.9471	36.1405	29.152	40.2207	32.2305	26.8894	28.4471	27.9399	28.9984	28.9616	29.9264	42.4032	26.7465
	70	42.1497	31.1356	38.0459	33.8435	40.9723	29.007	35.3524	44.2664	34.9424	30.6596	33.5512	50.2859	35.2128	24.491	27.1075	32.6413	28.4526	37.5183	29.3831	44.4361	32.7731	31.9494	28.5324	29.2943	26.8629	29.8795	34.1206	39.6236	28.2285
	72	40.6806	32.6565	37.9129	36.5748	39.8505	33.1256	37.8183	40.5325	32.8009	33.4763	31.4756	45.6619	34.7414	29.1309	29.3085	35.7376	26.4716	33.8988	31.0343	43.3581	35.1079	30.8388	32.4987	30.8335	29.959	31.5402	35.0012	46.1626	30.4993
	74	43.4692	34.3391	40.2338	39.7269	39.4445	35.7161	46.8377	42.8321	35.1045	33.8643	36.2518	54.9457	35.9613	28.7746	29.2007	36.6528	28.024	37.5992	30.0082	48.6332	33.6011	29.5204	33.3727	30.6888	28.7787	29.1559	32.8844	43.7647	29.5947
	76	45.3439	34.8524	40.0006	36.9318	40.3589	38.6758	46.1988	48.8304	41.8634	31.9935	36.281	59.2662	39.3723	28.5286	30.1704	34.3517	31.1768	32.1703	32.7474	50.7905	35.2699	26.8544	36.4423	29.2918	34.4885	33.1014	33.4308	47.2507	29.5161
	78	46.2167	34.995	41.4469	35.2396	44.2278	36.2627	45.8603	49.1391	38.3057	38.7834	37.6059	61.0393	38.655	27.7266	27.6805	33.3991	29.4443	41.5795	32.5954	50.5898	38.8546	31.9774	33.6007	30.9761	31.6216	34.4642	32.4251	48.634	29.1038
	80	43.7041	36.9466	40.7092	40.4473	38.5395	40.3857	52.4812	46.7429	39.5446	35.3987	37.9375	62.5927	45.3486	29.72	32.5948	38.2878	33.3742	38.1974	34.3964	50.7729	37.587	28.2109	39.9316	31.7206	29.3868	35.2867	34.2404	50.8873	29.6782
	82	52.1442	37.9383	44.6168	39.3174	44.2631	36.2621	57.921	53.8219	42.0021	34.9614	37.4617	60.9523	41.0923	26.691	31.6889	34.4153	33.6301	36.7171	33.1695	58.0952	38.277	32.651	34.8084	34.0304	31.8615	33.121	36.1293	49.0668	32.2312
	84	51.3404	39.2922	43.3571	37.945	43.8747	39.5355	54.6998	60.6971	39.8278	38.8895	40.3577	63.5135	41.3393	33.7857	31.5694	35.4122	29.2345	36.3781	36.235	65.781	40.3101	33.5877	37.1983	30.44	34.9353	37.4442	36.1649	57.8438	33.1922
	86	53.5747	37.8416	48.4371	40.2962	50.4875	44.8748	62.6388	62.4625	42.5802	39.1445	43.4715	58.813	41.3664	31.4459	35.2343	37.1242	32.1639	37.9545	33.996	61.3127	37.5614	34.3315	37.0514	30.0724	36.8829	36.8121	34.1005	56.1843	32.4865
	88	53.1337	43.718	49.2263	45.3864	47.3681	42.4954	58.2426	55.4673	43.3226	38.4208	42.8923	58.0903	36.0231	30.1861	29.2201	36.2181	33.1004	41.0898	36.247	54.4666	37.9271	30.4758	39.3406	31.4436	35.2848	39.8174	33.8731	49.5	31.6005
	90	52.773	40.3898	51.2016	41.4388	47.7585	48.1585	62.2274	55.5576	45.3188	37.9622	40.957	75.9664	41.5288	31.7516	32.3616	37.0472	33.6974	39.7748	36.5329	63.8703	39.8577	34.1358	34.4182	31.9584	32.1417	35.7244	33.0651	58.7419	32.4231
	92	56.8208	41.178	50.5664	45.8119	47.4211	42.51	61.7424	57.6192	46.767	39.2245	40.2205	73.9788	43.4262	31.782	34.8665	37.1695	31.1081	36.8667	36.868	64.5312	39.958	32.2072	39.4469	33.3038	37.4628	38.7915	38.3814	57.3401	32.7149
	94	54.2989	40.3082	51.9954	45.0404	50.145	44.4027	69.7191	66.4896	45.3786	44.688	43.851	70.5891	44.0283	33.9572	35.217	39.4644	33.8067	37.091	37.088	61.8862	41.2137	36.5225	43.49	33.2105	37.9961	42.0257	42.6978	48.1165	35.887
	96	59.2018	38.5737	51.4388	45.3138	47.7969	48.3853	60.6213	65.6837	46.6908	44.0637	42.8131	67.19	42.0633	29.754	33.8782	41.1315	32.3035	38.8495	36.9316	61.5204	40.3431	32.4518	38.4948	32.8454	35.4667	39.9207	36.4266	57.7142	33.2965
	98	58.3281	45.3306	57.8079	49.8126	52.5992	47.7565	68.4116	69.1978	47.8698	46.5167	47.5642	69.5182	46.6446	31.0765	34.6931	43.9935	33.7208	37.9437	36.8287	65.0385	43.4018	29.1156	39.8094	36.7435	40.6861	39.1239	37.6341	60.5407	32.6554
	100	55.864	49.6965	53.8701	47.3841	55.5191	50.619	60.5729	61.9651	46.4089	42.3777	43.8434	58.7701	45.6244	30.9534	36.1736	40.2413	36.1883	42.425	38.5237	64.3259	46.0173	37.5583	41.3885	33.5342	40.3543	38.7938	36.047	56.8931	30.8133
	102	64.1997	44.4452	54.1664	50.0978	51.5002	53.0397	68.2506	70.3826	52.7031	39.6385	49.8378	78.2587	48.9633	37.9372	40.3919	39.9761	34.8335	38.0252	39.1162	59.4816	46.2553	36.6705	46.6383	35.1972	37.0198	43.7519	39.3267	57.1001	34.9694
	104	62.0812	41.6469	54.3424	52.0727	55.9206	45.3384	62.6382	71.9397	48.311	42.9176	45.1786	73.0627	40.7072	30.6451	38.7179	37.7929	36.0327	34.1529	35.7187	64.1293	42.0309	30.7668	40.9732	33.9316	36.2809	42.4076	35.8365	52.1468	33.5061
	106	60.0668	47.3011	58.2672	50.5162	50.5125	50.6228	69.308	68.241	47.0434	45.8725	46.2384	67.2347	48.6611	38.3558	37.6537	42.5165	36.4025	36.8325	37.9871	70.2602	41.4582	32.9878	47.41	33.1916	38.4572	42.5925	39.6736	58.0088	36.7052
	108	63.3521	45.6947	56.6556	50.0411	53.2462	48.7244	66.2778	72.9764	47.6362	46.5771	50.9768	62.8637	46.2294	30.348	35.3551	38.8232	33.8941	34.6897	35.5853	58.9948	41.4144	34.2657	40.415	34.5467	40.5963	44.0092	42.5186	57.9503	31.6378
	110	61.5438	48.746	56.7328	52.3784	55.5248	53.0178	72.3281	73.4988	61.423	45.2377	54.4996	74.5656	44.1039	31.0896	37.8385	43.2111	37.2701	38.1644	38.4587	71.5637	44.8125	32.9062	42.1819	30.8733	44.3167	42.1675	39.4409	57.3724	34.306
	112	64.0952	47.5564	54.8286	52.777	57.7269	57.2425	70.166	73.456	50.6712	42.705	47.7822	64.796	41.9936	32.9492	38.1979	42.1835	33.2117	34.3584	36.8411	72.1502	46.2526	35.912	42.8797	31.6454	37.6999	40.8799	38.9611	50.6845	33.7968
	114	63.2807	46.6533	60.0023	55.8283	58.4476	54.8201	66.7113	73.0394	51.8347	44.0649	46.1542	72.5848	45.9135	33.3451	36.8823	42.1287	36.4951	37.4167	39.701	61.9859	44.3291	35.9181	40.7374	33.1443	35.1361	43.9228	41.8736	54.1559	34.6666
	116	60.3697	49.2883	54.1178	54.6458	53.2676	53.5579	63.6274	70.6991	53.6407	46.4469	52.1819	70.7364	39.9731	33.8679	37.9441	39.7415	32.7719	37.6224	37.0854	65.8971	46.6003	34.3065	47.216	35.5898	38.7164	45.6357	38.2579	52.3537	33.7972
	118	67.4841	50.6467	58.3794	56.3122	58.3178	57.1328	71.582	69.0274	51.2185	49.0706	51.314	60.4011	49.0119	32.0427	42.6682	42.8975	36.6755	37.6941	37.1551	70.3232	46.0067	37.4616	44.961	32.8022	42.9142	45.2069	39.7897	60.0751	29.4862
	120	65.0196	48.7719	50.5357	57.3658	59.532	47.8751	71.0455	75.0357	52.6094	48.0968	51.6244	67.2171	46.0651	32.4368	41.2237	40.8429	34.1167	42.0011	37.7538	73.6259	43.592	36.1378	37.9508	33.295	40.2582	45.4913	40.5548	57.2536	31.3853
	122	65.5283	48.0914	55.1656	54.4703	52.9876	50.076	69.9678	71.2048	47.1817	47.9291	52.5828	74.1231	46.0251	33.9793	39.3791	44.1119	35.3143	40.2035	40.9508	68.9654	45.1505	32.5032	45.1917	34.7659	42.1574	45.212	42.1651	69.1593	36.3864
	124	61.5827	46.5796	59.3194	62.1561	58.3004	55.2271	66.9705	63.9285	55.6231	46.7981	54.3651	60.3372	45.1884	33.8945	37.5452	39.9197	35.6495	31.8488	35.0709	64.7275	40.861	36.4533	38.6555	33.9486	42.7757	45.0443	39.5756	56.8959	35.5364
	126	68.7119	53.3628	56.1747	60.6163	59.1103	58.5991	71.5081	76.6909	52.6732	51.2567	52.308	63.1561	47.6272	29.6568	40.7331	42.0156	37.4976	41.5877	39.1791	67.5351	41.3182	35.6269	46.3861	33.775	41.6539	43.8878	38.8096	62.4425	36.1097
	128	71.2341	47.331	56.6135	57.2064	60.8688	58.7834	74.5062	68.1442	51.7737	50.5762	52.0294	79.3345	42.398	31.2499	41.1584	41.8627	38.6955	35.4533	36.5395	67.1853	44.1348	34.3301	39.5293	35.8104	44.182	42.7989	39.4869	57.9237	34.4594
	130	64.9169	47.0415	55.1946	59.9929	57.6073	58.1395	74.795	70.2775	49.7029	46.2863	59.8587	75.26	43.431	36.3246	38.2637	42.807	38.093	33.4752	37.3019	73.0807	45.2666	32.9384	41.6347	33.7877	40.5296	43.2144	41.1239	63.8718	34.7039
	132	66.0167	52.2741	60.6434	62.5214	56.7857	55.6261	69.8096	73.6358	53.6861	49.5044	52.0824	63.3597	41.6636	34.2892	40.8584	41.4883	39.0595	35.6201	36.7628	70.1481	42.7141	35.0184	39.1831	28.2828	38.947	40.8901	39.8389	53.3518	34.888
	134	63.6108	49.4715	61.0852	59.6415	57.8685	58.4141	65.5315	72.0797	53.6492	46.7899	49.2917	60.1756	42.3623	36.5126	38.5417	38.3994	38.8413	35.5431	38.632	61.3442	46.3979	35.2307	43.7138	32.9237	43.1533	46.0127	41.7559	52.6705	33.0248
	136	66.0516	49.2993	58.5216	59.028	59.4527	62.93	78.6253	62.8571	55.1579	46.8293	53.0907	70.4632	40.0296	34.1269	40.7677	42.7994	36.1685	37.5303	37.998	74.1925	45.0104	33.5642	40.8098	29.2998	44.1488	46.1389	40.6576	57.3549	32.9429
	138	64.3448	48.1212	56.2247	59.9611	54.4211	56.0014	67.1845	71.1864	51.7499	47.196	54.8789	66.5139	48.2565	35.4322	41.2852	42.1181	38.5699	36.4736	35.7074	66.13	42.262	32.2608	43.7264	35.1373	37.9226	45.1871	37.626	53.3412	35.4469
	140	66.2481	47.2548	55.0647	56.379	57.5157	48.9994	64.6709	68.4964	52.721	49.0976	53.0757	63.0273	46.0592	32.3522	38.3406	41.3684	38.4226	34.3683	42.1227	61.1004	39.2374	37.0336	36.8617	34.5228	38.9266	44.3662	38.4205	56.8688	35.936
	142	62.7418	47.0215	53.6826	60.6338	51.2844	59.5381	66.3245	66.4384	54.0452	42.2938	56.1624	60.2393	43.591	35.5579	41.6874	40.4789	36.6213	33.7004	37.3265	66.1591	44.448	33.2648	41.9408	30.5382	37.3526	44.3801	38.3706	55.9267	33.8041
	144	64.4491	53.0046	51.7486	58.7541	61.1185	57.1422	66.7098	66.1775	54.8786	45.6166	52.7747	68.0174	40.9938	33.428	37.7827	41.7819	35.5978	30.709	39.9727	66.4309	39.3896	34.4896	42.0121	32.45	45.4481	48.3602	39.4785	49.9443	32.8827
	146	67.133	49.3591	53.6574	58.9469	56.0989	54.9301	73.4949	69.6029	55.3203	47.9399	53.824	63.5991	47.643	34.9996	41.3483	41.8869	39.6396	39.7359	40.1503	61.4274	43.6524	36.0517	38.9189	31.0737	40.9893	44.384	41.857	55.4405	34.4754
	148	63.9336	50.6503	59.2509	56.3374	58.539	60.9885	67.8799	64.6021	51.6967	46.2839	51.7588	62.3035	42.2378	37.2254	37.9874	40.9588	37.9747	33.3556	35.2149	62.0525	40.6339	36.4745	41.7484	31.1346	39.8257	44.3678	41.1133	57.785	33.9416
	150	58.0791	48.1654	55.1142	58.8453	55.1257	55.1977	69.1052	60.9076	51.128	46.4057	53.7636	65.4113	39.2311	34.9163	38.3677	43.1629	36.636	36.4912	36.7344	63.2225	44.3166	36.5997	43.8669	32.76	39.4468	45.6726	43.0065	51.4003	34.5078
	152	68.1255	46.2711	58.2054	55.8989	60.7892	54.9776	67.1083	65.6759	51.0924	47.8897	57.5402	58.8815	42.493	33.2356	43.3712	39.6809	36.9916	28.4707	38.2734	58.8697	41.4568	33.8819	41.969	30.1916	40.1801	44.0992	36.3969	55.8201	35.0816
	154	64.181	49.22	54.0468	58.6718	56.083	56.59	67.5806	75.7668	54.1818	48.8043	54.8075	66.9622	48.541	33.3489	37.9094	39.5054	35.5636	33.0274	37.2259	64.7238	43.6903	36.6434	42.9777	31.1591	38.4665	42.7692	40.526	53.6258	36.3771
	156	68.303	48.5505	57.4429	60.3464	60.1194	56.2694	69.0937	67.8495	52.8178	51.8193	54.7034	58.8464	39.1368	35.968	40.0007	40.5589	35.5422	30.7182	37.2518	64.4029	42.5892	36.4784	40.1832	30.5589	36.7454	43.7787	39.2291	55.6469	32.8491
	158	66.4188	50.664	50.3913	57.2219	54.9173	59.4749	68.1022	58.3418	48.5539	46.0876	57.8156	62.6121	46.7506	40.2541	39.5344	40.88	36.203	35.7804	36.2164	66.0678	41.4856	34.2639	38.0899	33.0105	38.9265	41.0169	37.0226	52.0191	35.9651
	160	71.9764	53.9518	57.758	59.8897	57.3879	59.2204	71.3647	69.6785	54.7501	48.5488	58.7325	58.5692	50.6644	36.0298	40.1857	41.2529	35.9419	36.0932	38.0117	66.1044	39.0375	33.7363	44.4096	34.9345	41.0065	44.2081	39.9514	49.1663	32.3636
	162	62.7312	45.6741	49.5888	56.0937	57.9878	51.3649	69.3285	56.8068	50.0224	43.6236	54.3882	60.6838	38.6042	35.0822	40.6728	47.8564	37.343	29.5488	36.282	65.4081	41.2627	31.6534	41.2846	32.3039	42.2414	41.2728	39.6707	51.8684	33.3447
	164	64.6262	52.4881	53.2411	64.3495	53.7739	60.4405	65.8968	75.8561	51.5342	47.3297	53.833	69.4284	39.5741	33.1638	38.6066	46.4793	37.7831	30.5915	35.2556	60.0201	40.848	34.1307	41.5658	30.9899	42.2944	43.4224	41.3714	48.2827	33.0191
	166	64.102	46.1682	53.5778	57.3029	55.5195	52.7057	65.5945	69.4069	47.5499	47.3272	53.6512	56.0577	42.8803	37.9814	43.115	46.6824	36.3998	29.3037	37.0254	66.5666	46.6399	35.5211	42.0397	28.6784	40.043	43.8177	42.7895	58.1415	33.7379
	168	64.9979	52.646	54.5527	58.9423	56.5329	51.4344	66.7555	70.4848	54.5912	44.8634	55.2204	66.5647	42.7315	34.5381	42.915	40.7565	34.3725	35.665	35.3976	63.7134	41.3684	34.2804	43.1682	31.1779	35.7403	44.2734	36.9468	53.2122	31.0698
	170	61.7901	44.3994	53.0082	56.6625	52.8208	52.4232	66.0245	64.8224	45.3273	43.4433	50.3762	54.5162	47.8684	37.1255	41.5724	39.7957	40.3478	31.6778	38.1721	62.181	38.4383	38.3883	46.6909	30.6425	37.077	45.0519	37.9224	46.5545	29.937
	172	60.6728	47.0806	52.2269	59.1195	56.6051	51.2922	66.1659	58.2404	49.3288	46.3212	55.6117	48.6226	43.0539	35.2622	41.9182	40.4114	36.7965	28.7374	33.2351	58.2444	39.4868	29.8428	40.3157	29.6732	40.8123	42.2571	41.5174	51.8826	32.6207
	174	63.663	48.3384	45.9625	57.7456	52.533	55.4675	63.0042	68.6256	50.3933	44.4714	51.812	57.2504	40.739	34.269	40.0026	41.0346	40.5717	33.5294	35.4639	55.6362	37.8195	35.9871	38.4902	31.7124	43.8864	44.0075	40.3225	49.8157	29.8973
	176	65.3546	46.544	49.6241	55.2325	50.3895	51.6862	69.1227	70.1511	47.9492	42.6353	54.9519	53.1816	41.6627	36.0454	41.6822	40.6018	34.1783	28.9804	32.0813	54.6109	38.4853	32.5183	37.468	33.4379	39.8526	42.8091	39.3289	45.0502	35.3924
	178	64.2669	46.8035	50.8084	56.056	53.7358	50.9902	61.5111	58.2828	44.9642	44.927	47.0059	58.1381	43.8049	30.4728	40.8822	40.9468	35.9019	33.5437	37.8122	58.7943	42.7398	36.4219	38.7231	28.7843	43.3867	42.5721	39.9599	52.857	32.7251
	180	63.0992	50.3038	50.4984	59.814	57.0212	55.7419	65.012	66.6478	45.9566	43.596	54.8849	52.2726	41.4407	31.7468	39.4288	38.7073	37.6599	30.6163	37.4686	56.6523	39.6194	32.4399	37.6756	28.1041	36.2178	41.699	39.9205	49.5667	30.3325
	182	54.034	45.0781	51.4102	53.3913	50.4869	52.2965	56.3576	61.7176	46.1389	44.4969	51.6119	66.2295	44.1938	31.5038	40.244	42.8251	36.8658	32.2378	33.3279	56.4165	40.6787	34.2035	39.6531	29.9832	39.0671	41.8694	39.2727	51.608	33.5428
	184	58.3918	44.9912	48.8285	55.2879	51.7167	57.0912	65.2871	64.2513	46.1669	48.0124	53.6825	51.6166	35.9203	32.5243	38.7545	38.0389	33.5383	32.7597	32.7452	54.4627	37.6599	32.2716	36.4821	33.8122	37.7298	38.8041	38.7981	43.3219	32.2603
	186	61.3231	45.3498	47.6278	54.916	57.2566	52.035	62.8371	62.3991	48.3796	44.0019	56.4977	59.2336	39.7456	28.4166	41.3788	37.5304	36.2489	31.9396	35.4861	53.1432	36.9125	31.4707	37.6568	32.1681	37.3467	45.2921	38.7476	56.2981	32.6784
	188	60.7395	48.8172	56.1766	55.9616	57.0769	59.3238	59.9777	59.8429	45.2242	46.7048	55.1583	53.3251	45.6355	34.9224	39.7529	38.2304	35.008	29.6452	33.784	52.5705	36.5754	28.4569	38.1351	30.6145	37.3178	42.8171	38.6027	48.9207	29.9844
	190	59.333	46.9604	47.2272	52.1268	51.8769	51.0583	60.9385	69.5948	45.1871	44.2887	56.1071	59.2983	41.7504	35.3546	39.1114	40.1778	34.6715	30.2918	34.5556	63.8163	35.8385	33.712	39.986	28.3549	39.6566	44.4394	37.5954	45.7116	30.9639
	192	63.5528	47.6459	48.3413	53.4505	49.6856	54.7205	63.2822	64.2926	52.0552	43.509	54.3664	52.1482	41.122	33.2682	40.6373	38.7828	33.921	28.9974	32.7428	54.0532	36.3737	34.08	40.7224	27.0101	36.3899	42.2345	35.4621	49.2277	32.9358
	194	58.1605	47.9474	50.884	54.2536	53.1733	53.5137	68.4759	63.0373	44.1436	43.0564	54.094	55.0262	38.3726	36.7039	38.1926	36.6754	33.6296	29.8577	34.3981	59.5544	37.0806	30.164	33.3746	29.5771	35.1783	40.2031	37.3168	54.9073	31.7862
	196	56.0445	43.9583	45.0619	52.7288	55.8686	50.6748	64.1133	65.2586	45.6299	44.1023	56.7083	48.4537	40.715	33.2663	36.4588	39.8856	35.834	30.0929	36.1439	54.955	35.0219	31.0052	34.544	25.8249	36.8951	42.2297	36.0805	42.8202	32.8349
	198	55.9559	45.556	56.3255	55.0261	52.5157	52.6562	62.217	62.77	49.4531	42.46	53.0267	55.0286	38.131	31.8336	39.7215	40.2752	35.1901	32.4346	34.6104	57.0311	36.0879	32.194	38.2115	27.7375	37.6358	40.9168	34.3953	47.4478	30.4071
	200	62.0764	44.742	49.2012	58.2012	51.5825	49.0296	64.0543	58.661	45.855	43.9582	47.0695	56.8272	46.2077	36.4276	42.4277	40.2254	33.5353	31.2775	33.7437	61.8587	37.1483	35.3998	40.4517	29.4985	39.2654	40.1347	38.3925	46.8692	29.7317
	202	63.0987	45.3413	47.8271	58.535	50.3673	51.6691	63.8836	60.8465	43.5658	45.9298	49.5401	44.3942	37.198	34.13	35.7792	38.4809	33.0844	33.0361	33.8705	51.9037	34.4198	31.7092	35.6893	28.6191	36.9383	41.9353	36.5413	47.5189	32.0103
	204	61.3123	45.6043	48.156	56.0798	51.1159	55.438	58.0059	64.3819	45.3659	44.8071	51.3478	55.9297	40.7064	32.2981	37.9982	44.0147	34.8307	27.7366	32.9725	49.0436	36.9553	31.101	36.5735	30.6678	33.5976	39.4078	36.3512	50.0362	33.2239
	206	60.152	43.9402	46.2405	57.6748	53.0865	49.6263	61.7457	68.0447	45.2331	45.431	51.8767	49.9532	39.5802	33.9659	37.7598	38.6802	34.5032	27.9442	32.5956	53.2157	35.9866	32.2323	36.9305	29.8702	34.4324	37.212	36.5664	44.13	31.7718
	208	58.5386	43.7398	51.6405	54.3395	54.7334	46.375	63.4914	59.4641	47.8188	45.8602	50.7032	56.605	37.6936	31.2957	38.5598	39.2637	32.9105	29.7444	32.4138	55.387	35.3296	29.7155	34.8868	29.3278	36.8803	41.3956	38.4145	47.3942	29.7729
	210	59.9149	45.7011	47.6885	47.5766	52.9014	49.6311	58.1884	61.6764	46.8273	42.3726	48.4879	51.1492	40.5068	31.9676	38.8485	38.2395	36.2734	29.7822	33.7204	52.9378	34.9107	32.1664	38.0638	28.6657	36.9108	43.1101	36.951	45.373	29.7359
	212	58.5335	41.9307	44.5592	52.9197	55.0724	49.9688	57.5919	54.4655	42.4628	37.596	51.4877	49.3953	39.8646	33.3953	36.8179	37.6951	32.1912	31.0504	32.127	54.583	37.8219	35.1956	33.937	26.4342	37.0124	39.6978	37.3915	45.5903	33.176
	214	57.6655	40.5786	44.8395	56.3619	51.543	49.8192	60.3209	65.0031	47.6817	43.6338	53.6059	53.2429	43.4222	35.3926	40.196	35.4841	33.3489	29.2683	33.4104	50.791	35.2604	31.1943	35.3966	28.7064	36.1937	43.202	35.5052	48.6029	29.4197
	216	55.8167	44.693	48.0363	54.199	51.1378	50.0509	55.4935	63.5199	45.2361	38.3336	47.5403	52.7903	41.4264	32.6956	36.4622	39.8797	34.0242	33.228	31.9411	54.2915	34.7878	33.4483	34.4185	28.0797	40.1613	37.278	39.3459	53.388	30.4602
	218	62.4469	44.7504	49.0952	56.151	50.1818	52.2537	57.9924	71.2115	46.6475	42.3232	52.7693	56.7722	38.9947	32.3271	40.2476	40.4369	36.0646	30.1841	32.7644	47.5516	33.8607	32.7396	39.3718	29.892	35.1048	37.1539	37.4446	45.9121	30.2452
	220	60.2642	43.2782	45.4982	53.6481	49.784	48.0202	56.852	54.5648	44.8952	42.8871	45.3843	51.7151	39.9172	30.7682	35.7418	38.8447	34.2735	31.3408	32.8513	56.1544	33.7664	26.4736	38.6121	27.4904	34.3992	41.2925	34.7911	49.7797	30.5272
	222	55.5919	43.426	49.8371	53.8725	49.7795	50.4945	52.1896	69.2269	42.2755	39.3074	47.2275	50.6604	38.7313	30.8403	37.8505	39.6371	34.6879	27.7205	32.316	52.3911	37.9441	29.592	38.1795	29.2683	36.6552	40.5217	36.2544	42.8414	30.2084
	224	55.16	40.8829	44.255	50.2621	50.8601	48.386	54.5489	65.3428	44.8828	38.2849	51.838	47.8426	35.2949	30.4355	37.3375	39.5984	34.9649	28.7721	34.2475	54.0676	32.8919	30.2333	35.28	28.228	37.3437	41.6417	35.6694	45.388	33.1565
	226	57.2604	44.729	44.4387	50.8226	49.1933	47.0563	57.3025	64.0963	47.3806	44.506	50.6292	47.5291	42.2244	32.3192	34.8376	38.6628	30.1716	29.8832	34.4859	51.7149	33.5596	27.2231	35.276	33.7304	36.9795	40.5655	36.4373	51.3296	28.9891
	228	50.0182	41.1538	45.6029	52.3214	48.7226	44.1644	58.2818	59.1729	42.1784	39.9037	48.7692	46.7261	37.7882	32.5901	35.8637	37.0737	33.6211	27.6106	32.4066	50.3915	36.3327	29.2438	34.6709	25.4255	37.7167	37.8676	35.8759	43.4279	30.39
	230	60.5593	41.4208	49.7408	49.0172	45.1846	43.8055	56.2979	56.0211	45.4609	42.394	47.1112	51.8316	39.6642	31.53	33.7531	38.019	32.4883	28.0275	32.3529	51.2448	31.2405	31.4101	33.4566	26.7336	35.8547	36.7872	36.2131	42.0182	31.0571
	232	56.4689	44.7502	43.2403	52.2083	51.929	46.0619	55.4084	59.0147	43.2178	37.0085	49.7066	49.079	35.2313	33.4679	36.4421	37.9682	34.0238	30.4159	31.8555	47.5724	32.9062	26.5963	33.8835	27.4164	38.7655	38.5699	37.3345	41.248	31.6591
	234	56.8007	46.2612	41.9537	49.8325	49.8558	41.7872	62.0485	60.2517	42.9092	40.1991	43.0086	51.0374	33.7747	33.3386	35.8459	35.5776	31.12	30.7895	31.0023	52.9143	32.2902	29.8683	35.4525	25.3755	36.7621	35.5366	35.0258	41.4367	29.0333
	236	58.0423	43.9185	45.2363	50.5094	50.2378	53.4892	57.8957	53.2708	45.5286	41.9936	49.3464	46.4634	37.754	31.6613	38.0834	38.8041	33.267	29.3438	32.1456	49.2231	31.517	29.3898	36.389	28.0368	34.6339	36.399	33.2766	41.2818	30.1218
	238	55.5683	43.1023	48.6145	56.4391	49.6739	44.3055	58.4809	63.5165	47.4577	39.5381	47.6718	42.9848	36.6141	35.7088	37.7543	38.3032	32.3295	30.2279	30.648	43.5426	32.8325	35.2854	33.4316	29.6509	39.041	40.3457	31.3287	39.5536	28.4629
	240	56.0732	43.831	47.1246	49.7311	52.3564	49.624	59.5654	56.8362	45.0597	44.0002	46.4273	45.1581	38.0225	33.901	34.7932	35.8224	30.3625	36.5185	32.0986	46.7265	36.2191	32.0086	31.542	28.4931	38.3967	37.3113	38.0459	47.8262	31.9237
	242	58.9171	40.394	44.0949	51.9892	48.6333	51.2901	51.4549	61.6804	43.516	41.5513	48.5673	45.4119	40.3145	31.6609	35.4505	38.8693	29.6752	27.3392	32.037	45.603	29.8025	29.4649	31.9303	26.5476	33.5699	34.8987	34.5092	43.6544	29.2887
	244	58.1212	43.855	44.8628	52.8347	45.7038	52.1583	60.9602	59.9039	44.3036	42.3215	45.053	41.8307	32.7665	31.5031	33.3888	34.145	32.8175	31.208	30.0514	48.7462	32.0077	27.7844	32.0229	28.0125	34.9254	39.0371	33.894	40.1178	27.6462
	246	54.9877	42.4727	43.0332	50.5405	49.8028	49.8433	55.0132	61.7244	43.7772	39.2242	48.6044	45.7892	36.9833	30.7522	35.658	37.7385	36.0155	30.8183	33.494	44.0982	32.5148	27.5557	31.746	27.6536	38.5045	41.1453	34.6004	49.9799	29.3134
	248	58.5233	43.9035	45.2448	49.7024	50.5814	45.8539	53.2603	61.602	44.4974	40.5937	44.0658	48.9862	36.6282	29.9714	36.7967	36.8498	32.0621	26.501	30.1559	45.5536	31.3616	27.6584	33.2632	27.2392	36.6131	42.6571	37.7419	44.9873	29.5173
	250	53.0769	42.3665	46.5414	49.5125	47.9071	52.2603	55.9257	62.5274	41.279	41.6245	48.5426	46.09	36.5919	29.5202	35.9863	35.9765	33.7019	27.8846	30.6285	49.0473	30.4842	25.5521	34.0272	26.0582	33.2101	35.6408	31.8566	40.5694	27.0244
	252	56.9443	40.954	40.4394	46.9683	42.5712	47.945	51.7332	58.8533	38.8721	38.4877	46.186	43.1218	40.9134	31.8344	35.3728	35.4844	30.0499	30.4676	29.4577	41.6906	34.605	28.323	33.6498	26.1416	36.346	38.4436	34.234	40.8826	27.9379
	254	57.7625	40.3299	44.0044	52.7291	48.5865	50.7434	54.9807	63.0594	45.3724	43.3035	43.37	42.8971	36.1383	32.5247	36.9718	36.2007	32.2041	29.5431	30.8321	44.1579	33.2683	26.7473	35.1536	27.1072	32.0421	37.0018	36.2529	41.7872	29.116
	256	55.7798	37.9969	43.6331	48.0911	45.1223	45.2239	49.6004	57.3366	44.4813	44.4063	44.9412	42.9562	40.6725	32.241	38.3014	38.6244	33.4676	27.4452	29.5607	50.6881	34.0767	29.4644	34.1898	29.5934	34.2073	42.1286	33.2569	45.0788	30.7452
	258	55.7875	42.3124	46.2655	49.4511	42.8213	46.6909	52.5188	64.7225	46.8081	44.2768	45.6219	44.8993	35.3619	30.8756	37.6989	36.7727	31.2696	24.9932	28.5046	39.5603	29.016	26.7624	32.7071	25.4631	35.6817	36.2485	33.254	45.3402	28.1067
	260	57.3572	44.7212	41.8609	49.4042	49.7592	45.3997	53.3804	63.5685	41.2023	40.1918	44.3125	44.7667	35.9092	32.0486	35.8243	34.005	32.1608	27.0811	29.6643	44.4893	30.4361	30.8247	33.1831	25.7391	35.192	35.5829	33.7506	42.1461	27.9726
	262	55.7213	44.0448	48.3251	50.498	50.0793	49.4318	56.06	63.0544	44.4961	43.4405	51.9742	38.0512	39.2664	27.8959	34.2659	35.8568	32.13	28.792	28.9148	45.6562	30.0687	27.388	33.3865	26.2902	32.5982	37.2089	34.1996	44.6921	27.8964
	264	57.3752	41.0495	41.5533	50.2558	42.3712	49.6254	54.4632	57.9184	38.851	41.4645	45.5749	47.9324	37.1922	34.4308	36.0113	36.1543	30.2471	26.7174	31.8318	47.8848	33.8429	27.4263	33.9669	25.8121	36.96	37.6541	36.7149	43.8243	27.4698
	266	54.9907	40.7317	43.8268	52.4306	49.1801	45.0718	53.4177	59.2625	42.9829	37.0944	43.5316	42.0291	37.3948	30.1251	34.4972	35.1823	26.0545	27.1206	29.2241	44.0052	30.7718	24.4485	32.7358	26.9561	35.7043	35.6575	33.8443	39.8103	26.0383
	268	52.8543	40.5932	40.6236	47.9386	46.4939	43.1951	52.0757	59.3615	42.908	42.1398	47.0835	41.4865	40.203	29.3114	34.3422	36.9718	31.2307	29.0454	29.7809	50.2688	31.9623	27.7419	32.5916	27.3486	35.8455	38.1133	33.2482	43.7946	27.9746
	270	54.3861	43.842	45.2784	50.8048	45.078	49.325	51.8456	57.3566	44.1116	38.0056	47.0569	37.643	31.6317	30.3448	37.1381	34.9255	31.4611	28.7402	30.9971	39.316	30.6717	27.6314	31.9119	27.6426	33.8792	36.0333	33.1927	44.3615	27.5009
	272	54.2136	40.3199	43.6151	44.779	43.1459	47.0896	51.1625	54.6308	41.0956	40.314	45.3097	41.7293	39.4008	29.3895	35.5048	34.3068	31.187	27.2917	29.7254	44.5421	31.9098	23.2257	33.2409	27.2502	33.5427	35.7853	35.2156	44.9893	27.3917
	274	54.0352	40.6785	43.6149	48.112	46.3268	45.3557	52.2372	61.8462	40.1789	38.2952	44.5884	40.4558	32.9642	29.113	34.8809	33.3009	29.2135	27.8489	30.8592	41.228	31.3936	25.8674	32.4268	27.827	33.3377	35.8656	36.0925	45.4518	26.123
	276	56.7721	41.829	39.433	50.7851	46.517	44.3508	50.9862	58.9303	40.9982	43.0196	44.7854	40.8264	36.1728	28.6718	35.406	36.7031	31.5114	28.6748	30.0332	44.5774	31.2525	25.6942	30.551	27.0562	34.0967	36.4683	32.9569	38.3894	25.5147
	278	55.1282	41.8017	41.9577	48.3055	49.6691	51.7376	50.8599	55.2375	41.1767	41.4511	41.886	41.7527	34.9217	31.641	33.0912	36.0744	28.4255	26.1574	28.1498	44.2059	30.467	25.1488	29.9462	26.0629	34.3079	34.5192	33.7659	39.9823	27.046
	280	57.6201	38.9982	47.6516	46.8951	49.2179	43.7973	51.5814	56.7208	42.0617	43.0919	41.4021	40.0566	36.086	27.9318	37.247	38.0653	31.7321	28.397	29.4446	43.6732	34.5935	27.5504	30.904	29.4194	36.6186	34.7594	34.7476	39.6237	25.3269
	282	54.4703	39.875	43.2783	51.9979	46.3632	40.9502	54.1342	64.5144	39.454	44.0783	46.2092	41.0244	33.7853	30.4826	34.2505	31.5622	29.7384	26.7395	27.6325	41.6058	30.4436	24.1974	31.3572	29.2685	31.5001	34.3441	30.5021	39.8661	25.6664
	284	54.7807	41.5866	43.5637	49.482	50.6091	44.4338	53.1468	52.5749	43.8544	44.6578	45.5854	44.9608	39.5341	28.6238	39.3318	39.5295	32.9194	25.777	31.2086	37.0856	35.0137	28.0307	32.5727	26.8236	33.5307	38.3061	33.9226	38.9857	29.5383
	286	49.4595	42.1439	44.9092	52.4234	44.1748	43.6982	46.6483	59.0677	44.2129	37.4296	43.1336	40.7451	42.2932	31.7397	37.2116	34.725	31.0886	24.2886	28.811	40.9234	32.6608	26.7112	33.2088	26.8832	32.4788	36.9103	33.1016	39.346	29.5329
	288	52.8266	41.4779	43.663	44.3977	46.6478	43.5601	48.6554	56.5058	43.671	43.299	48.505	37.4318	38.7845	30.8653	36.3131	36.2406	30.1693	29.5409	29.9306	45.6398	32.6234	25.9091	30.4698	31.2308	34.7909	31.8802	32.7966	43.6652	30.3794
	290	55.6716	42.328	43.5469	46.8848	47.8207	48.1728	55.9378	59.9734	40.0236	40.2936	43.9643	41.4676	35.4067	29.0536	34.5876	34.5032	30.4386	25.9577	28.4095	43.8671	33.3283	29.0775	33.2758	25.4702	35.2043	36.5942	31.5406	37.4549	28.0775
	292	51.7257	38.2827	41.6905	47.1249	46.1889	39.6836	49.8193	55.5124	42.1744	39.2797	40.193	40.6971	40.3764	28.7565	35.567	33.0547	32.211	25.8641	31.9895	45.9227	33.1269	26.3886	32.6399	31.3797	34.5275	36.3066	31.927	39.391	29.4216
	294	50.8919	41.5533	40.4559	48.7626	43.3024	43.8116	46.0541	56.8868	38.2418	43.3577	45.1973	35.5504	35.0133	32.6212	39.2502	38.8908	30.6018	29.3868	30.4046	45.1633	33.2295	26.7627	34.0779	24.8904	36.901	32.4815	33.6338	42.1656	27.6297
	296	55.6566	38.5123	38.8987	50.144	46.1373	43.3572	52.2608	57.7858	40.6986	39.146	42.3318	36.9839	36.1033	31.9723	32.9364	36.4001	31.6911	27.1153	30.5307	40.196	30.9909	28.6767	32.281	23.8998	33.4007	36.6884	33.3146	42.2101	25.7362
	298	52.7716	40.7556	39.9319	49.5634	47.481	45.9813	51.9928	59.7396	38.6594	41.5318	45.1655	47.3617	33.475	31.5983	35.527	38.125	29.5018	26.7994	31.0236	43.0448	32.0009	29.2812	31.8611	26.3796	33.5025	38.0708	34.4951	44.0743	27.4307
	300	54.225	41.0748	41.825	46.5311	43.0786	49.1469	51.0203	57.5896	37.8701	40.5444	41.8548	36.1537	37.5974	30.4528	34.9065	34.7532	32.1675	24.0961	30.7475	48.1889	31.3318	26.6688	30.2408	26.2825	33.3005	36.8446	33.0054	44.4597	25.9595
	302	52.7076	38.2327	42.5897	45.9825	38.6798	40.8785	49.3742	48.0005	36.458	40.5937	41.3319	36.1801	34.5279	32.5172	35.2446	36.8149	30.0738	27.439	29.927	39.0979	34.7511	27.6597	31.562	27.6624	31.0888	33.7953	34.1291	38.4216	27.5294
	304	53.9499	39.5408	45.2444	50.547	45.8223	43.7971	50.4088	59.7166	39.4552	42.3071	42.8661	39.2079	33.3364	29.3616	31.8497	32.95	31.1467	27.2287	27.1747	43.8677	32.8298	23.8623	31.4595	26.5486	35.0515	34.0457	30.079	36.7981	26.3686
	306	54.186	43.1348	44.7195	45.5896	43.429	43.5968	45.5177	58.1994	37.9936	43.3426	45.2438	41.574	33.6891	29.1981	33.9376	37.3751	28.2274	25.7929	27.8881	48.2976	30.4566	24.2062	32.532	26.7954	31.5341	32.5961	32.586	39.6536	26.8293
	308	49.897	40.1871	45.7278	47.5956	45.6701	42.678	48.3499	57.6902	37.5904	39.027	40.6452	37.5315	34.2742	30.5752	34.8149	34.1958	29.5365	26.8457	27.208	36.4963	31.4203	25.6977	32.3103	27.9164	33.9445	34.9068	34.462	41.4365	26.6293
	310	48.7035	39.9044	40.5637	47.5457	41.2292	45.5715	50.4633	54.1503	38.9413	37.1917	43.8769	39.2245	31.7891	29.86	33.4886	35.305	30.8687	31.0391	27.8048	38.9671	31.0227	28.9743	27.4558	25.5853	34.6234	33.409	35.4307	41.9906	29.0427
	312	52.1049	43.6296	42.3827	47.3682	46.949	48.9707	52.8104	62.8422	41.4821	41.0051	46.713	36.8869	34.3126	28.5579	34.8783	32.9465	29.6382	25.1209	27.9725	44.563	34.0962	26.6234	32.3265	26.0109	33.938	33.6499	32.6649	37.3579	26.6447
	314	48.2914	43.1593	40.5817	44.6178	46.4999	40.3794	52.4844	58.3884	38.1424	38.7349	43.5137	39.4029	35.5155	31.0993	35.2586	38.6831	31.4709	29.0477	28.3189	43.6982	31.9975	29.539	31.3143	26.1179	36.753	36.9868	30.6047	39.373	27.2315
	316	57.1005	43.3915	45.0272	48.3203	41.8318	45.1524	50.5721	65.0553	41.2575	43.77	42.9841	35.7153	35.7349	33.0275	34.1418	34.0953	28.6814	24.6941	28.6293	41.3051	30.7497	26.6352	32.2363	26.7819	34.1249	34.7377	32.4299	40.9431	28.7499
	318	50.4697	38.2447	38.7604	47.8746	40.738	47.0883	43.5375	54.0113	37.5264	41.5818	40.8899	39.4128	36.5462	25.6168	33.1604	33.33	30.3353	27.3203	30.6993	39.2603	31.9379	27.7029	30.9131	26.0884	32.0918	34.6783	35.3639	40.3674	30.0315
	320	52.0933	39.117	44.5798	48.5653	42.7183	48.3037	50.8589	58.1878	42.0322	42.2003	45.6606	38.8212	36.7075	30.5523	30.5494	33.9565	28.505	25.9984	28.0531	43.1574	32.6359	25.4597	32.6119	27.648	36.8145	36.4508	32.9256	42.7688	27.8619
	322	50.4906	39.6696	40.625	46.8513	44.9505	44.6234	46.4995	53.1533	38.8511	39.8751	40.5475	38.4326	33.5727	32.9298	35.6533	37.1907	29.0818	25.7563	28.8107	43.9256	32.5266	26.3447	35.5291	27.3486	35.0637	38.9025	34.8646	41.9563	27.4772
	324	52.3629	39.1826	42.2285	48.3015	44.6838	40.0685	48.1453	54.9862	39.3579	42.5979	44.5274	39.9598	34.3192	31.7121	30.561	33.2313	29.3964	28.5629	27.9435	36.2729	32.4244	25.2786	30.5728	26.2349	32.4482	32.7903	33.6422	42.8719	26.813
	326	54.6053	38.8682	42.9404	46.0503	44.3611	41.5525	48.6789	53.8274	38.6584	37.8164	41.9739	37.8643	30.9828	27.5387	33.8751	32.2446	30.2583	28.601	27.2926	41.3794	33.3219	26.3988	27.5073	27.3553	34.098	32.6425	33.4015	40.186	26.3502
	328	53.7936	41.8635	38.9181	47.8361	49.4274	44.0948	47.1343	62.8271	39.3964	40.9475	42.8041	35.7393	33.7131	30.7183	33.385	37.2992	29.812	24.6598	27.7186	45.0068	32.9074	26.4311	33.6585	28.298	33.1578	33.0866	32.4626	36.4263	27.7365
	330	49.8925	36.6906	39.8055	44.3585	40.706	47.5191	44.4982	54.1627	35.5921	37.6688	43.6817	36.0947	32.6269	28.8387	34.3404	35.9978	30.3164	27.508	27.7958	34.652	32.1025	28.6735	31.1388	30.0641	32.3542	34.8106	33.6059	46.2755	26.3098
	332	53.0809	40.5065	39.8229	47.6308	41.0072	39.4952	43.9183	63.6323	39.7026	38.7638	43.9849	35.4113	34.5677	29.9412	32.7517	37.2619	31.1175	27.4532	27.4851	40.2084	32.4682	26.0422	33.8625	27.9766	31.6222	34.0047	31.9064	39.6758	27.3984
	334	45.2892	37.7097	38.1695	43.9328	44.2167	43.2244	47.6345	56.058	37.364	39.0914	39.6128	36.8644	34.7579	29.2876	32.1332	35.586	29.2551	26.436	28.1887	41.0192	32.5276	27.4114	30.4721	27.1829	31.3395	32.264	33.732	37.7209	24.4848
	336	51.217	42.2957	40.5839	41.8491	38.8991	44.5428	49.263	59.5073	39.1146	42.8178	40.053	36.3688	37.0779	31.1837	34.9273	32.2865	26.5111	25.2144	29.1623	41.4885	30.2698	24.6324	31.0991	28.5203	33.6677	37.9733	34.2176	40.8692	27.2753
	338	51.2129	41.118	38.7042	45.6122	42.3196	43.6022	48.1468	59.7468	39.3579	41.8557	41.5407	39.1084	36.5908	26.3066	33.1716	32.4344	30.2864	25.6723	28.3558	37.5432	32.6614	26.0645	29.5039	28.1516	31.8525	34.9626	33.3081	40.2264	28.0378
	340	51.1322	38.8212	39.1286	49.0374	47.2497	40.9327	47.304	51.7011	36.9516	40.3201	42.0294	35.9288	32.7211	27.8709	31.1649	31.9974	27.231	26.1874	27.6937	39.2913	30.0997	26.7463	29.8533	25.8987	31.9625	34.6592	29.7143	36.1065	27.9717
	342	53.8846	38.3226	39.7698	46.3089	42.2119	41.5749	46.1325	52.5415	37.3558	40.0208	39.5373	36.7445	35.6	29.3811	34.4635	33.5415	27.2012	25.2314	29.6604	43.3924	29.9931	26.884	30.7488	26.8451	38.3925	34.65	31.5312	42.9487	28.4712
	344	50.6514	39.6747	38.0471	44.8571	42.1767	45.8451	45.068	59.8785	35.5609	37.7026	37.1266	39.5713	33.5299	28.3198	33.0664	31.6441	26.1786	25.5802	28.1368	39.557	29.6413	26.3117	27.2529	24.0351	32.1827	31.6442	34.0943	39.4664	25.0574
	346	48.7056	42.7411	38.2409	45.4643	39.3904	43.4712	45.1119	53.0501	37.4121	38.7852	39.2285	39.4967	36.9217	30.3125	35.1713	32.8796	31.6276	26.5374	29.8044	37.8365	30.578	26.8363	31.0187	28.1763	34.1756	34.418	31.4503	38.1729	27.5038
	348	51.6152	43.4343	43.3722	44.0132	42.4945	41.9782	47.06	59.0678	40.2802	41.7548	43.3666	39.5517	33.8465	32.9983	33.3554	32.5897	30.3669	25.2806	27.0278	43.1831	32.1889	26.5814	29.2302	25.2236	30.7733	36.6799	32.0401	38.3098	26.1599
	350	53.9438	39.1559	37.6816	46.422	43.6372	36.3416	45.4723	53.26	35.2804	42.09	36.8152	40.3057	33.2563	27.0019	34.6099	36.0816	30.3943	29.9576	29.1713	39.5299	33.1696	25.6932	34.0739	28.0986	32.9443	34.4396	33.1096	37.9535	25.8563
	352	50.3328	43.2477	36.0461	47.3192	40.7607	38.6484	47.1232	50.6466	38.6294	40.7906	40.0495	37.2352	33.6991	31.1926	33.3708	35.7866	29.9317	27.0985	29.651	36.3533	33.3552	26.063	30.1233	25.9082	28.9843	35.3527	33.6572	40.1032	25.3338
	354	52.2043	38.5347	42.1876	44.1574	41.4238	38.9119	47.5111	57.0169	38.2646	39.8566	38.8056	35.7985	33.9618	27.9601	33.0331	34.0828	31.6769	27.0289	27.2494	38.5926	31.1827	24.2741	27.8124	24.7376	31.4826	35.0435	32.0689	42.627	25.0083
	356	50.5604	38.0087	37.1951	45.2872	39.817	43.6542	47.1381	49.7104	37.1597	40.074	40.4331	37.6609	34.4629	29.4729	32.8127	33.5047	31.1633	27.8284	26.9054	37.8242	31.9882	27.1548	31.5722	25.3108	32.1475	34.5919	31.4998	39.9964	26.656
	358	52.3975	37.6294	38.0437	44.398	43.3631	44.6109	45.3187	49.5685	40.2649	35.4568	36.565	38.2479	31.6726	30.1354	36.3162	30.9933	29.1252	27.9774	28.1781	35.1597	30.1123	25.0556	30.0955	26.1717	31.6332	32.9716	30.4073	38.0991	23.4308
	360	48.9601	39.4958	39.3144	43.5354	43.4725	49.2461	46.0212	50.1779	36.1953	38.6007	39.4743	34.8509	32.6456	26.8576	36.3883	34.1061	29.0036	26.614	28.6155	38.0124	32.2438	24.5477	28.9139	24.6602	34.5425	34.3234	31.9928	37.2906	28.1535
	362	49.9298	39.1911	40.9593	46.5279	41.7409	46.2086	48.6388	62.1793	39.8007	46.0902	43.2859	36.3287	35.1038	29.9647	34.7914	32.4707	30.7918	25.6647	27.7536	39.7649	29.8634	25.4898	31.7179	24.9014	35.2409	33.7477	29.3291	40.5192	28.5486
	364	50.8602	38.4268	39.6901	45.646	40.8438	43.4172	44.8528	54.9407	35.4728	44.7696	43.2953	42.4211	29.3126	28.8038	34.0614	35.5178	30.8564	26.4157	27.0333	42.2117	30.5626	24.3062	32.2303	25.9619	32.0616	37.662	31.0078	33.6218	24.7743
	366	49.5354	37.9733	39.9269	43.1371	42.5847	39.2218	45.4927	53.0286	37.167	40.4489	39.9556	40.0201	32.531	28.5036	32.08	32.5742	29.2479	23.154	27.1643	36.1483	31.3306	23.5077	32.1855	25.5172	31.5749	31.749	31.4958	39.488	25.6835
	368	51.7429	37.2363	38.8332	42.5565	41.262	39.1618	49.0491	57.5747	35.9086	35.4271	39.5962	33.06	32.6416	28.0296	32.7465	33.092	30.4978	23.9592	28.5274	42.3331	32.9786	24.0507	31.403	25.4783	29.2455	34.64	33.1519	39.7253	26.4143
	370	51.4192	38.5104	37.676	39.6955	41.5879	43.6418	46.3699	57.2641	38.7568	39.0571	38.7158	33.9381	35.8539	29.4363	32.2022	33.3243	29.8468	26.9836	28.9268	32.5586	29.0295	24.1656	30.1781	25.929	29.8746	33.4196	32.2794	36.1608	25.0905
	372	56.7869	38.1686	37.0862	46.5782	40.9691	38.2528	41.8371	54.8863	36.3856	41.7013	41.324	33.5029	30.9296	28.1902	33.3963	33.8061	28.4376	27.431	28.4551	37.5174	30.0794	24.6878	29.8288	25.7111	31.7636	35.2078	31.0785	40.9379	26.5635
	374	47.5491	38.4237	36.2456	43.1376	40.5437	41.5434	46.2008	59.9515	38.8591	38.6472	44.2468	36.0816	29.6327	25.3343	34.6367	33.3621	26.2783	26.4007	26.8542	37.8109	30.7267	22.7846	30.6442	25.2739	29.8033	35.3891	29.773	36.7652	24.1742
	376	51.9472	38.8956	40.831	43.5762	42.7311	41.6664	43.7782	53.9148	39.042	41.8987	39.8714	31.7927	29.491	27.4939	31.2805	31.0284	26.5858	25.9671	27.3791	36.4685	30.9711	21.462	31.3071	25.9927	32.489	32.786	33.2185	36.7952	25.1802
	378	52.827	38.2958	38.6765	46.119	39.7564	41.7167	46.6683	55.477	36.0904	40.122	40.3029	32.5016	33.0692	29.5892	35.179	31.567	26.5975	24.675	26.9969	35.7049	28.705	24.3166	30.0556	24.5808	28.5585	32.7013	29.0935	35.5849	23.8028
	380	45.8938	39.0485	34.0786	41.1294	39.627	39.2386	40.4551	49.5737	39.8044	37.1187	39.7589	36.9707	35.1114	29.6777	35.6922	35.0965	28.7826	27.1193	27.378	39.2737	31.4279	25.8922	32.8257	25.2736	30.4003	34.0925	30.3921	40.7685	23.4921
	382	49.5378	37.5683	37.3525	46.5824	41.3973	40.5972	46.2966	52.1792	35.5966	42.004	40.3763	32.655	35.5035	31.8265	33.4099	30.9788	30.2149	25.9514	26.538	38.0148	28.4251	24.1682	26.7324	26.4428	31.9313	31.8024	28.7618	35.4673	25.2185
	384	48.5817	42.4236	38.2745	47.5025	40.5824	45.9976	43.5139	56.3491	39.4552	41.3955	39.7643	38.6318	33.3938	29.8928	32.2119	33.291	27.778	27.3526	28.504	37.9752	32.8846	23.8316	29.3996	28.0999	32.0599	34.5294	29.2931	36.6023	26.5001
	386	49.4234	35.3896	37.1176	45.8882	41.2143	45.5809	47.0749	49.4339	40.6866	38.6909	38.11	32.1648	33.4007	28.0827	33.1531	31.007	28.0463	30.4392	26.7821	37.4331	29.3103	24.7669	31.4836	25.0221	29.1998	33.4404	29.6114	36.5488	23.8268
	388	48.7002	37.5398	41.1222	42.7024	38.4708	37.4873	44.9068	54.6822	36.3765	42.4384	37.7658	37.6386	34.2009	31.4451	33.2834	33.6509	27.109	27.6309	27.697	39.1387	30.1661	25.2311	30.8933	26.6929	29.4285	30.6107	30.0653	39.7301	25.8339
	390	49.5925	39.9993	39.603	46.2656	41.2222	47.1182	47.185	53.5975	37.1903	41.8186	42.2746	28.9021	31.262	24.5381	33.0989	32.0488	27.1554	25.4216	27.1507	38.4838	28.4948	22.513	29.0413	28.7557	31.5792	32.7823	29.0401	38.9198	24.656
	392	50.4879	39.2395	38.3698	44.6405	36.3729	44.2018	42.0215	56.3648	36.8895	41.2922	37.8045	34.1079	33.7675	30.1631	33.9246	32.5066	30.7374	31.963	28.2344	38.9281	30.9822	26.3023	32.0304	26.6445	34.2696	32.846	30.2758	41.2639	25.1212
	394	49.0643	42.018	38.9922	44.4008	39.3902	45.6114	43.5459	60.3731	35.2409	43.3804	38.8491	33.3943	31.7777	29.3728	30.4752	31.6431	26.7443	24.4214	25.8388	38.1742	28.1659	22.0746	28.8521	27.9973	31.7555	33.7579	29.3617	35.2947	25.305
	396	49.8391	38.695	35.7454	42.5014	40.3313	41.3137	42.2771	55.8439	36.7316	38.3947	42.1301	35.3992	33.1207	27.8471	33.2076	32.6201	26.8179	27.7153	27.8742	34.3593	31.0387	24.3446	27.2872	25.1705	29.2657	32.8569	32.7872	36.1459	25.1824
	398	51.6913	38.3408	38.873	46.5503	37.611	41.3013	45.0747	56.5383	37.6278	37.1833	38.2712	31.9698	31.7547	28.1422	32.9742	31.0361	29.904	23.2553	27.3158	37.1793	29.857	24.5165	26.157	26.5762	31.3485	35.4037	29.9107	37.4866	27.4296
	400	48.3387	38.4139	38.8386	43.1098	40.8595	39.5283	44.326	57.8501	35.8656	38.582	37.8203	36.6115	33.777	30.3135	32.1981	30.9306	27.0074	27.2649	26.9836	34.991	30.2285	24.4127	30.3618	25.5963	27.7568	34.2579	29.6646	38.6238	25.5145
	402	51.0166	36.9602	38.2809	43.9756	40.61	39.128	45.9679	55.4544	35.7633	37.5248	40.6916	34.7662	33.873	28.3209	31.4489	31.4958	27.2002	25.1981	25.9616	39.2894	29.2147	25.7888	30.2368	25.6099	30.4665	30.4595	29.5095	39.1498	23.6349
	404	47.0352	40.9818	34.9165	43.2454	37.4954	41.2581	44.0936	52.4105	38.2289	38.2921	39.0989	36.2881	33.1761	29.5415	31.7999	31.8498	27.6873	23.7139	30.2564	37.5776	29.872	25.4023	27.7154	28.1036	30.9022	30.9755	31.8974	38.0408	23.4264
	406	49.3098	36.9407	40.0998	44.3037	40.654	44.7868	45.2463	52.3142	35.1612	43.279	38.0079	32.806	32.3354	28.6806	31.3943	36.5176	25.5211	27.116	24.9451	35.6454	28.2361	24.1188	29.9748	25.2751	32.7	32.3957	30.5175	38.4462	26.8048
	408	45.6986	37.9583	39.6441	42.8916	36.1282	38.9513	42.2438	53.976	33.7082	37.4497	40.6009	32.8877	31.8061	25.7954	32.7009	31.5402	28.9585	27.5055	26.8951	38.1288	29.9844	24.3161	29.1757	25.061	33.1126	34.032	32.229	39.9901	24.3367
	410	49.0937	39.919	38.5445	44.4884	40.8422	44.0779	44.5732	55.6605	36.3972	43.8804	37.8952	30.9248	29.6889	27.7122	30.5861	32.4215	26.4864	23.4604	26.9677	32.8373	27.6905	21.9158	29.8716	24.3235	31.8281	32.2991	29.8159	42.2411	24.2749
	412	47.5419	36.6974	38.6035	41.991	42.3208	43.8071	46.2189	55.231	41.0445	39.2233	36.5422	40.0429	33.6885	26.8192	31.8555	30.2461	27.5517	24.7723	27.7699	36.5683	29.8937	25.7595	27.5148	26.5567	33.247	33.6298	30.2284	38.175	25.421
	414	47.5114	37.0014	37.7361	42.8914	40.5128	42.9846	44.0662	51.6747	39.5308	41.5431	42.0494	33.7064	35.1217	28.6641	32.8722	31.1702	28.7615	25.3926	26.7858	39.1012	33.1529	23.2109	30.4781	26.4032	32.648	32.8235	28.2984	40.3115	25.8186
	416	48.5257	36.0235	34.0887	40.7784	40.0513	39.5387	46.6138	59.4625	36.3453	37.293	39.3737	33.1463	34.2403	31.7672	32.5325	32.3965	25.5984	25.5114	27.9302	35.9867	26.7094	23.5122	33.3252	24.5529	30.908	30.5182	29.1681	37.8871	26.2668
	418	48.006	37.3404	35.7289	43.2556	42.1004	38.09	42.6155	56.2641	36.7028	40.2549	38.353	32.7836	32.7079	31.5933	31.678	30.5241	26.8857	28.8221	27.0042	37.2172	28.3295	23.1162	29.0104	24.8081	34.2404	34.3644	29.6651	43.0319	22.6726
	420	48.5804	37.8814	35.1189	41.6276	40.4026	41.9116	41.0643	49.3498	33.6236	38.9014	37.7999	28.8752	30.047	30.936	31.0878	29.9362	27.4512	23.5192	26.9267	32.877	26.9177	21.516	28.836	23.4736	32.1542	31.2321	30.7224	37.9986	23.3564
	422	45.5841	40.4913	35.644	39.3771	38.4053	39.2332	44.2114	53.4015	35.4468	39.3249	39.2615	29.0595	30.9665	28.3926	30.8956	31.931	28.3156	28.036	27.2626	30.8589	28.2967	22.965	30.8834	24.2896	32.0654	31.7492	28.981	43.2013	25.5376
	424	48.2486	36.4487	34.4776	45.5977	40.4689	38.6892	44.1675	51.6725	33.9852	43.8188	37.1051	31.717	37.0042	31.6807	30.6917	34.3097	27.2215	24.3867	27.7847	43.8874	28.7545	23.8783	34.2489	27.2478	30.2435	34.1798	27.2283	33.2675	25.7798
	426	51.8865	43.9496	40.8704	44.9567	43.592	45.9565	49.3041	55.0029	44.3712	41.5891	41.9659	33.4501	38.3541	29.1971	31.2603	34.1868	25.4805	27.0845	25.6274	32.9933	29.3538	25.1968	30.5548	25.3851	32.8814	34.2135	31.1856	42.3448	24.8878
	428	50.785	37.5551	34.4074	43.284	40.289	44.3197	39.7529	55.2732	32.7325	38.9128	38.2243	29.6088	31.9061	27.0941	36.4484	33.0152	29.7448	23.4438	27.499	40.5544	29.5714	24.1489	32.9084	26.4046	35.355	33.3447	29.6838	41.9812	25.1324
	430	48.4434	42.8971	37.0348	41.1741	40.1054	42.0807	44.1838	56.0466	35.3727	36.9766	40.1433	38.8134	32.6886	25.1554	31.6262	31.6797	27.4228	25.478	25.6855	36.6163	28.2127	23.747	31.5451	27.3244	31.9964	30.0869	29.5855	37.2855	22.7919
	432	48.1233	39.0264	37.1772	42.7965	39.2169	39.423	42.4718	52.9575	34.7223	37.8871	39.5195	34.8681	33.7406	27.7128	31.6893	30.0777	27.5978	24.2283	26.4101	35.6814	28.9788	25.5825	31.7311	27.5875	30.5685	32.6067	29.7738	38.4466	22.9605
	434	51.335	41.1441	38.4721	44.1531	38.3774	43.8399	45.4061	51.2779	34.2855	39.0143	40.7343	41.705	35.7506	25.8597	32.6888	31.0499	24.6315	27.9862	26.4307	38.4334	32.2392	26.9941	29.4976	24.9916	29.5589	35.2136	30.0477	41.8424	24.0956
	436	47.7891	38.5743	36.9439	41.8412	37.3873	47.835	44.5175	48.5634	35.9221	38.4768	36.4914	33.6532	29.8055	30.7475	33.2271	29.3215	27.3339	25.429	26.6678	39.4895	29.5962	24.5992	31.9198	26.6717	33.5715	31.451	31.1564	37.1683	24.1228
	438	50.6996	40.0335	38.6553	43.2766	38.6872	43.6513	46.6029	51.0146	38.1259	40.2979	40.3225	32.4677	35.9772	27.0552	34.4393	31.4626	28.1953	25.2398	27.4498	32.7324	29.2141	23.6793	30.0562	24.4631	29.0822	33.2589	33.2883	37.9516	25.8559
	440	49.6199	37.6064	36.6628	47.7988	39.4851	40.5007	45.036	53.7618	34.3096	41.0007	36.5294	34.4239	33.0085	28.3744	34.0153	36.1582	27.1591	22.982	27.3081	34.5079	30.9576	24.012	31.6394	27.4682	33.528	32.4173	30.3101	32.8716	25.8044
	442	49.6284	41.0734	39.1551	42.839	38.7034	43.3412	43.6286	59.4345	40.9104	40.6056	42.7859	27.5008	33.1173	28.7596	33.5172	30.8645	26.7352	25.0146	25.9993	35.768	31.9303	20.8158	32.1385	26.0001	30.8144	34.0404	31.0855	37.0236	25.4708
	444	52.9491	41.2628	37.2401	46.797	38.7338	56.8285	48.6874	58.4806	40.44	43.1624	39.0113	30.8476	30.3316	28.4394	28.5444	29.2234	26.2082	21.7298	26.7899	35.6225	28.6878	22.3592	29.2795	24.225	30.6471	32.0205	28.9553	37.5285	22.2316
	446	56.1588	41.6468	37.7218	53.5824	41.3277	56.1265	50.7657	56.3891	46.9197	43.6026	42.9405	29.9389	36.5507	27.3307	32.0226	30.951	27.3741	24.4672	27.0845	35.7279	28.5586	21.9688	27.533	25.3369	33.2382	30.3889	28.6082	37.5189	26.3102
	448	58.0197	49.4726	41.0441	63.1925	42.0066	61.716	51.7658	66.8267	48.355	47.3099	46.3092	34.427	31.7798	29.1827	32.3302	29.5586	27.8499	24.1547	28.5936	36.8487	27.7721	23.765	26.487	26.2801	30.6544	30.4022	31.4035	38.404	24.995
	450	67.2602	52.8765	41.4218	77.784	46.7781	71.4115	61.0183	66.9855	49.4346	54.1378	47.0588	33.7727	31.6192	26.9004	29.37	31.0933	25.8872	24.8328	26.6255	39.6977	29.3577	24.0759	29.3997	23.922	30.7971	32.7768	29.8388	36.9369	22.7354
	452	73.7228	55.8838	45.4072	78.5342	43.8949	74.0039	62.9705	61.3677	48.4628	51.847	50.6639	32.2124	30.2227	29.0065	35.0067	35.6494	28.6154	24.6972	28.1537	33.4763	28.126	22.9035	26.8849	27.8627	31.5321	30.4584	30.1356	42.4992	25.048
	454	75.5983	52.4925	44.7921	84.7356	50.1778	68.155	64.1473	66.1493	50.9885	54.2725	51.802	31.8064	32.706	29.5298	31.012	33.8864	26.4117	23.6864	26.5645	33.5999	30.0453	25.7966	29.9046	25.8351	28.9327	30.9081	30.1004	40.0724	24.3676
	456	79.8547	55.5138	46.6784	83.3928	48.4795	67.2399	66.7827	66.9639	51.6842	63.2171	54.4871	32.2116	34.1852	27.4167	33.4305	30.468	26.5199	25.2427	26.5043	37.4845	29.1215	22.8824	32.0704	27.9183	34.4468	33.9107	30.1577	39.5216	24.0914
	458	88.3364	57.4731	52.816	80.3587	46.6518	72.9521	76.9607	65.1299	58.8462	64.9202	51.0624	34.4912	33.6174	26.198	33.6007	33.9336	27.808	23.3716	28.4655	41.3349	30.5253	23.4677	30.2938	26.7682	35.1835	33.6064	28.889	39.1112	24.5763
	460	93.7882	56.8716	50.2659	93.2497	53.3594	81.6767	74.0858	76.7992	56.0008	72.1771	50.2531	35.0891	34.171	25.4259	31.2175	28.8829	29.3559	26.0079	27.495	36.0841	28.2137	23.4707	28.1234	27.1202	31.9526	35.015	31.5377	39.384	23.071
	462	96.3814	54.8042	54.911	88.3181	55.7268	96.8781	77.1183	77.1286	61.442	67.3544	57.4916	28.881	30.157	28.1768	30.7056	30.669	25.7236	20.5328	26.2143	36.1183	28.1024	22.3073	28.9243	25.7891	31.897	31.7161	29.7407	34.9209	24.4879
	464	100.604	66.468	54.6838	89.6246	55.003	95.438	78.4851	76.1658	63.4291	67.7413	53.4746	33.377	31.3831	29.8926	32.7972	31.7736	25.7364	28.0663	26.4673	32.1779	26.6122	20.2619	28.8844	24.6541	33.702	32.1467	29.5281	35.7313	25.2762
	466	103.654	62.5608	53.2354	92.7206	55.6813	97.4108	80.5341	79.1322	62.9908	67.8721	58.8257	27.3447	31.6772	27.6132	31.3319	30.6664	24.6334	26.6309	25.7269	32.3008	28.0979	23.4448	31.4141	26.6794	30.6465	30.9429	29.8005	36.874	23.2462
	468	113.147	70.8414	54.2425	97.254	59.8699	89.5305	88.6757	66.6864	69.898	68.4229	61.7145	34.1672	28.3364	28.2384	33.2447	31.4786	24.9096	29.3467	26.2535	34.8262	31.746	25.4862	29.0958	27.8211	31.5175	29.8881	30.3987	39.2729	23.5501
	470	117.041	69.925	54.2552	100.236	59.405	100.915	89.6217	65.6999	70.362	63.527	58.491	33.3378	32.4242	28.7151	32.8404	27.2064	26.6206	28.3071	26.893	29.5823	29.543	25.4416	30.5419	24.5707	30.5757	33.41	28.6028	34.9695	24.5154
	472	119.319	74.7325	61.4529	97.6057	61.8714	115.807	92.0515	75.6207	66.4966	79.8478	66.1247	34.4125	30.8642	27.3084	34.0415	26.1606	27.6449	26.7546	28.7274	41.8654	27.9648	22.966	26.3889	27.5281	31.7721	32.5858	32.1505	34.0784	23.9646
	474	132.448	78.4876	61.0909	105.369	61.9763	100.057	94.0722	86.3784	68.8966	79.6773	66.1191	33.4126	31.629	27.2769	29.8348	31.9066	28.7164	25.2088	26.8512	36.6151	29.7675	24.8164	28.9873	25.6525	28.7143	33.9378	28.3953	38.0584	22.5229
	476	134.881	78.8644	67.2874	98.8481	62.3056	97.8625	93.1857	82.7304	73.2387	79.6904	68.2153	32.9795	31.9403	27.915	32.1395	26.8132	29.8176	26.0382	24.4387	36.4887	31.2305	23.293	28.7272	26.3778	29.8198	30.1738	29.3394	37.1223	24.2919
	478	141.856	86.476	57.1475	107.633	61.6895	107.123	96.7251	73.5465	72.1371	76.6261	65.0454	29.1475	32.8355	27.3269	31.4949	29.0921	27.9265	24.6046	28.1911	36.9305	27.8954	22.8354	29.23	25.3733	33.4394	32.1212	30.711	38.1719	24.7465
	480	134.224	78.9471	63.9071	105.782	66.5159	105.748	99.9792	89.4704	69.139	75.3444	69.1315	32.329	32.2355	28.4173	32.8594	31.3627	26.8325	25.1698	28.456	40.0663	28.2971	22.2427	30.2316	25.1995	29.2036	30.1732	28.9321	35.1318	22.8477
	482	145.166	83.5827	58.3236	107.153	64.556	107.098	106.302	85.9013	70.5868	77.0589	68.7049	32.264	33.1146	27.4405	30.4414	33.1571	25.9776	23.5651	27.6461	34.9931	27.6593	22.6204	31.356	25.4577	34.0855	32.0325	29.8833	38.3237	24.0172
	484	145.665	84.4336	60.998	110.833	61.4655	103.043	110.562	96.2271	74.3799	74.6842	70.0637	32.7303	32.6919	30.4838	31.7273	30.1082	25.2348	25.78	26.1032	32.7764	27.2693	23.6677	26.6653	23.1783	29.9487	32.4574	31.595	36.9792	25.6364
	486	152.243	84.4894	59.3332	113.842	65.522	113.53	111.584	85.5667	70.6946	74.5176	74.5365	29.1775	31.3191	31.8718	33.0513	30.3938	27.7325	25.992	26.5931	35.4514	27.4329	25.6112	27.3007	26.9303	34.2624	32.5624	28.5481	34.155	24.3118
	488	149.713	88.3174	64.0462	109.761	66.7273	115.782	119.678	81.6092	72.249	79.5755	71.8895	32.992	35.8882	26.2135	34.5163	30.5717	27.9673	25.6356	25.4378	33.3622	26.2452	23.2749	33.6295	26.4808	30.4032	30.9386	27.9132	33.5143	23.3529
	490	161.071	86.0539	65.3928	115.694	66.3015	116.969	108.538	93.2052	82.7402	80.9325	81.8248	33.1995	32.2243	27.1646	31.9976	28.6149	26.6859	23.6943	26.0215	41.9901	26.3038	25.0006	28.434	25.48	31.3298	31.4022	28.8471	35.8232	22.8714
	492	148.567	84.151	66.6512	109.147	66.5235	125.901	119.797	89.8318	74.0003	78.2296	82.349	28.6445	34.0174	27.5765	30.6821	29.988	27.9402	25.5889	25.5798	33.7703	28.7447	24.2741	28.0639	25.2084	33.9441	32.169	30.4447	35.4694	23.4144
	494	151.111	91.2258	65.3618	116.836	69.9716	117.145	114.215	78.5702	78.6513	75.0515	71.0596	31.8572	31.6036	26.8876	30.6355	30.4025	25.7153	24.4037	25.0216	34.1928	25.9957	23.196	28.256	23.2555	29.0793	32.3809	28.2782	32.1213	23.3539
	496	153.869	96.9875	70.5901	115.538	71.6585	122.644	127.975	106.103	87.8078	81.8474	77.576	29.3313	32.4496	27.1212	32.3766	30.262	27.5276	22.569	25.833	34.6329	27.3367	25.3821	32.2782	25.3261	35.3516	32.4781	28.0701	41.6006	24.6691
	498	170.834	92.0329	59.4074	110.426	65.0189	124.211	120.455	83.247	81.1445	77.5411	78.1026	30.7719	30.2488	27.4884	30.7262	29.3572	25.0876	23.4172	28.6116	38.0907	25.7971	20.7271	26.9756	25.7764	28.9658	31.1477	29.7841	34.9813	23.2299
	500	151.898	95.563	69.4284	115.407	73.2105	106.73	126.321	96.2246	86.5528	85.1805	78.3791	34.096	34.998	28.6931	30.5405	31.0963	28.1012	27.8296	25.4134	35.6166	28.186	23.9115	28.9229	26.9386	32.3623	33.4946	29.3679	40.1702	23.268
	502	164.975	101.892	62.8975	110.751	63.0132	129.38	123.286	84.8134	89.0491	85.7283	82.898	30.1205	36.502	25.5254	31.8422	29.442	24.431	25.0832	26.8302	31.2286	25.598	22.434	31.1779	25.3564	28.8506	29.8328	26.392	32.6411	22.3686
	504	163.219	98.1391	63.3186	110.279	69.4613	122.129	122.555	91.1335	90.5464	84.4614	79.4079	34.2034	30.894	28.8481	32.9268	31.8022	27.8439	24.6807	27.6841	31.9455	27.9067	23.6291	29.2467	25.1381	34.0527	33.561	30.6659	41.0064	24.4109
	506	170.193	94.9671	60.8193	114.182	69.9822	115.362	128.89	93.9541	92.927	81.7801	84.3475	32.3908	30.0966	26.7192	32.6494	31.9427	28.7097	24.7874	25.7469	35.4455	28.7052	23.3981	26.6217	22.9658	28.0104	31.3087	28.351	37.1171	24.3373
	508	171.849	98.385	68.1484	117.268	72.1793	106.938	128.953	94.5843	91.6715	87.6362	71.5811	33.6015	32.6025	28.3379	33.2704	30.1467	30.1885	31.7219	26.6556	36.1144	30.9178	23.4092	29.3979	24.574	32.6375	33.6969	32.0027	39.0162	23.9367
	510	161.245	94.65	67.4768	114.939	72.3519	121.121	127.155	90.4818	88.8562	77.3596	78.3537	35.0393	29.7176	26.9172	30.4373	29.6393	25.2164	24.8362	26.6111	33.9742	26.6453	21.2826	26.0108	22.6656	34.8008	29.7412	30.5794	36.9079	23.2307
	512	162.153	96.3163	65.8518	123.255	72.3932	121.321	132.384	92.8827	96.8905	82.6461	82.9005	29.1294	32.6881	29.9381	31.749	32.1968	27.5829	23.7246	25.8013	32.388	29.6485	23.0628	26.7068	25.3666	32.112	30.9167	29.267	35.9138	23.1011
	514	162.425	99.4582	64.4266	124.546	72.3085	117.118	136.321	92.4506	96.0627	82.4714	75.5021	33.2082	30.4441	25.4885	30.2011	32.309	24.2731	20.1924	23.2308	34.3692	26.4203	22.4068	26.2958	25.7407	30.4527	30.8567	26.4518	39.5578	24.4026
	516	172.76	94.3814	64.6161	121.117	73.4722	125.104	146.826	84.6185	103.604	82.4065	82.5416	30.1418	33.6015	27.3636	33.2566	32.3066	28.0454	25.4434	26.1773	39.1999	24.2578	20.955	31.1275	26.6972	32.0052	28.7811	32.2007	36.4939	22.6722
	518	163.105	87.5509	60.5479	114.237	78.875	113.529	133.125	86.0936	81.1775	81.316	74.7737	32.806	34.2777	29.979	30.8955	29.059	28.3871	26.6205	25.6091	37.7811	26.3465	21.1571	29.8853	27.05	28.5201	31.1664	30.2858	35.4168	24.2511
	520	171.36	94.5611	75.3997	117.91	72.1684	122.014	145.834	103.721	89.4721	85.7827	80.2045	32.9168	34.5883	26.4999	31.7355	28.3567	24.6939	25.9567	24.2823	32.7324	27.5469	22.9943	27.8864	27.3106	31.3053	32.1371	29.4964	37.3408	23.7101
	522	164.148	95.7844	67.5752	116.472	69.8484	119.655	137.993	90.5199	93.9739	88.566	89.8258	30.9933	28.8846	29.3511	31.5722	28.3092	24.1666	25.681	25.0425	31.9642	27.8851	18.4453	28.5158	23.1441	27.967	31.6497	26.1795	34.7921	20.4995
	524	162.578	93.8386	70.7757	115.664	74.257	108.118	140.443	93.5182	86.5494	82.1637	85.1063	31.2919	32.5691	28.0503	30.4211	30.1975	27.2105	23.2555	24.7138	41.3566	26.9564	19.6286	30.9099	26.4695	28.3172	29.68	30.7241	33.3886	22.1541
	526	177.729	97.2906	71.281	117.086	74.2179	123.612	144.215	91.7813	94.2299	81.9859	88.5858	33.0715	30.3396	29.6107	31.1673	29.6745	26.0104	22.4837	27.1802	35.8489	26.1739	22.4899	26.193	23.2265	31.45	30.0604	28.6494	39.0761	22.6941
	528	168.423	91.7923	65.1714	115.998	75.2428	122.973	139.764	100.447	81.8267	82.5712	82.3516	30.1337	33.6865	24.6245	30.6783	31.5183	25.6572	24.4959	26.1555	42.582	24.5312	22.635	28.6513	25.1326	30.0206	29.7932	25.2076	35.5557	23.3546
	530	166.98	90.3996	65.2604	114.371	77.3358	125.078	148.384	90.8985	89.0277	77.9767	84.5184	29.8202	29.5728	25.6161	33.3935	27.1474	25.9271	27.2842	24.7356	38.2512	27.3822	21.3237	25.9763	24.6769	29.6987	31.8696	30.3583	35.2623	23.7417
	532	169.718	98.8071	62.3702	113.146	70.4453	120.011	140.458	96.8476	89.0456	84.7844	82.8771	30.9994	28.4894	26.2085	31.972	29.4339	26.1512	29.809	25.4803	32.8598	25.9532	22.4122	27.6772	24.141	29.7751	32.8954	29.5432	39.6582	24.1044
	534	166.945	97.1564	70.3158	113.516	77.754	122.681	147.712	87.0684	92.9979	88.3899	88.3236	27.1605	33.3104	25.1346	30.3363	30.9754	25.9456	25.8272	24.8567	33.4421	25.2394	21.0151	26.5877	22.1949	29.0067	30.8413	26.0358	35.0138	24.6836
	536	169.019	96.8778	70.0721	123.635	74.4282	123.569	141.634	97.8329	92.3896	89.4202	87.8223	28.2039	31.2971	26.6001	32.76	30.1805	26.5868	23.3962	25.3081	33.4898	25.6089	21.4419	26.8691	26.0819	30.3563	31.3324	27.4823	37.0581	21.6117
	538	166.698	92.069	71.8391	118.17	69.7014	109.381	147.63	88.5529	84.2477	91.0231	82.713	29.6095	30.7361	25.0105	30.3146	29.5868	29.0116	22.5635	24.4298	36.0551	23.5044	22.7056	27.0906	24.3735	31.864	31.2761	28.6931	32.3233	20.7594
	540	182.784	93.0882	70.7902	111.425	72.0606	104.167	131.152	85.1179	85.8886	88.1624	86.7504	29.6086	32.9461	25.0839	30.9884	28.4651	26.6402	26.6393	26.388	32.0663	26.5996	24.8172	28.4563	23.1747	29.9069	33.4711	28.2665	40.6091	23.4183
	542	173.517	93.4202	65.1496	121.884	72.5643	120.989	138.501	95.6215	86.9503	88.2327	81.4567	23.4453	32.9161	23.2674	29.6147	26.5633	27.8302	23.1566	25.0085	34.2832	26.2117	19.9326	27.3269	24.5729	26.9878	32.1417	29.0557	38.5043	22.6443
	544	161.529	98.5496	69.4245	119.998	69.2805	120.125	136.719	105.889	79.3301	82.8615	83.9263	31.4878	36.5514	24.702	31.0706	30.7981	25.9408	25.4762	25.6003	35.1335	27.2856	23.4962	27.7134	27.1681	29.6886	32.1914	28.4109	35.6279	25.1398
	546	169.327	89.4053	72.8344	110.645	75.9547	111.652	143.766	100.201	95.3348	78.3963	83.075	29.0485	28.466	24.3996	30.085	26.0296	28.2501	24.9929	25.3474	35.2143	26.9542	20.5126	23.7623	24.1554	27.6606	30.6926	28.7375	34.1984	21.9161
	548	162.053	94.3697	71.8849	115.975	69.4347	110.007	137.008	89.7871	89.3163	78.1242	80.1988	31.4278	32.6385	24.8967	31.792	30.3394	27.9121	26.2391	26.3997	37.8111	23.4115	21.7647	29.4357	27.3353	31.5235	32.3316	28.6136	37.5493	24.3984
	550	175.425	96.3543	63.9605	116.214	75.9163	114.049	141.783	93.9234	83.495	89.128	87.9	30.0963	29.5073	25.9073	29.9326	28.9845	26.2225	23.0173	23.5317	32.7572	25.3589	21.547	27.7531	23.9924	31.2316	32.3168	26.675	37.8582	21.2613
	552	170.859	93.2032	67.932	105.007	78.5902	105.309	146.03	95.634	84.9269	82.5578	89.9323	31.0191	30.8324	23.6676	30.4596	28.6964	24.0036	21.0751	24.8507	34.7314	24.7418	22.6721	27.1665	23.3112	29.138	30.9722	29.1173	41.1663	23.0283
	554	148.153	90.7758	66.068	102.555	69.5327	119.357	124.439	92.7836	86.1005	77.442	85.2649	26.594	30.7775	23.7358	29.4464	28.2099	23.5863	23.6836	23.6379	35.4078	28.3542	21.0078	28.6507	21.9615	29.2064	29.2935	25.781	37.9831	21.9069
	556	165.345	87.909	65.4507	115.696	72.7198	109.853	135.86	97.5186	83.8888	82.443	77.1533	28.1468	34.59	25.4915	29.2368	29.8612	26.4142	27.9968	26.6388	39.1226	25.2339	22.8433	27.1056	22.1094	32.7045	29.0746	29.8674	28.5446	22
	558	158.61	86.7425	68.5437	112.495	69.3195	100.965	131.374	89.4822	82.5718	86.1764	83.6107	28.2169	31.9711	25.1867	29.447	29.3209	28.2634	22.2137	25.5371	34.2161	22.2498	22.041	26.233	25.0148	31.2697	30.5533	30.0217	31.8928	21.7613
	560	169.388	86.2096	59.6082	118.288	74.4569	109.59	135.686	91.3262	86.578	84.005	83.854	28.8431	32.9649	25.4337	30.5514	28.9824	24.8224	23.9925	25.4936	35.0487	26.0433	23.8555	29.9855	25.0364	35.196	30.0356	29.0562	35.6565	22.3086
	562	165.798	89.9953	66.2741	120.767	71.635	104.468	126.087	93.4649	77.8898	81.7099	85.4922	30.1705	31.5405	27.0728	30.7597	28.4341	23.9298	22.0591	25.5249	35.8255	25.5496	21.8609	27.056	27.4904	28.5209	32.1719	29.33	34.2592	22.7613
	564	157.876	84.2839	62.7645	117.977	73.494	110.06	142.655	92.3615	83.589	85.3308	83.353	31.007	31.9997	27.9545	31.1999	30.5901	25.8807	25.2656	27.3883	36.4117	27.1421	23.5743	28.0721	27.018	29.6451	30.7884	27.1333	32.6363	22.5602
	566	156.055	84.819	66.1309	122.468	70.8038	113.757	127.575	96.1721	78.8184	80.4776	80.9304	27.2061	30.584	27.3975	29.3567	26.9856	25.5618	24.3339	24.661	31.6793	25.0133	20.5451	29.3663	24.868	30.582	29.7809	29.392	35.9195	22.8393
	568	146.373	87.3479	65.5312	113.146	69.0735	103.934	133.321	88.6964	88.5479	85.4287	76.7407	31.7642	29.2201	23.9676	32.2538	29.5879	25.1072	23.1458	25.9186	32.5953	26.1783	21.5254	26.583	24.7099	29.6992	32.7678	28.3761	38.8137	22.2522
	570	154.771	87.2724	68.4011	110.849	68.5628	111.843	136.869	105.689	81.0564	87.4327	94.6709	33.8903	29.6333	22.5282	29.4236	30.0762	26.1579	23.8862	24.5761	36.9644	22.3554	22.4587	28.5671	26.9147	29.977	31.7231	28.4112	34.743	22.123
	572	146.174	88.8884	61.983	109.13	65.4749	96.9024	116.542	88.0981	83.2862	83.4547	87.1619	30.9643	30.0722	24.05	31.6531	27.8486	25.2273	24.4402	24.5826	31.1505	23.4243	25.69	28.4548	24.6379	27.6375	29.2319	28.596	33.0332	21.5608
	574	151.807	82.5917	63.772	113.963	70.6037	108.479	131.011	88.2418	86.4441	82.5339	91.0923	30.0839	28.9955	25.7347	29.9095	27.823	27.7721	25.3144	25.8843	32.5362	26.5737	21.3813	25.2927	24.045	28.6697	29.6348	28.3174	34.6697	23.4494
	576	158.113	85.6254	68.3106	112.008	63.5314	120.736	127.593	75.9663	78.885	85.4665	83.4635	29.4468	33.1429	25.0295	29.2741	29.4422	28.21	26.0303	25.9185	36.0646	24.2578	23.7478	30.5846	28.322	28.0066	31.9794	29.1734	35.4482	22.7859
	578	149.257	85.7059	64.5621	109.628	69.5287	103.947	123.438	99.0147	73.0737	79.475	87.6252	29.6604	29.0113	21.5428	29.7772	27.0012	26.725	25.315	24.5781	40.1826	25.4436	20.9171	28.6366	26.8099	29.4004	30.6896	27.4155	35.151	23.115
	580	149.92	83.0088	66.3924	112.516	67.6437	101.089	126.988	87.3211	78.8579	74.8882	82.5184	27.3417	28.6893	26.4757	30.7172	31.142	26.1543	21.6522	25.5958	35.2262	25.1975	24.1699	27.0282	25.4378	29.4153	29.4541	29.2255	32.1975	21.2381
	582	150.771	88.0126	62.8113	111.746	68.5956	114.831	118.629	99.0607	82.2764	82.4151	81.3678	27.6987	32.7522	28.4445	28.6793	29.248	26.9322	24.2202	25.3103	35.7278	25.3608	22.6623	29.0174	25.0217	34.6598	29.976	29.0699	33.9866	21.9406
	584	158.301	79.4776	62.649	113.167	66.8391	100.725	118.973	83.2472	79.9213	76.7243	86.9291	30.1905	28.1882	25.3547	30.377	31.1224	25.8863	23.5961	23.1475	37.6699	24.1673	23.9601	29.4141	26.7221	27.4665	33.4359	32.5516	32.7931	22.9019
	586	156.436	81.5156	61.1411	108.876	67.3104	95.6889	120.028	94.8583	83.5611	79.2043	81.9144	31.6734	31.8142	25.6086	30.8213	27.1742	25.8883	22.0169	25.4901	34.8697	24.8975	21.2915	28.8007	22.8183	30.1066	29.6628	27.029	32.3647	21.6077
	588	144.593	72.8945	59.328	106.177	63.264	92.1685	129.237	85.2181	77.3127	71.8227	79.8704	33.6311	31.6584	27.4821	31.7315	28.0849	27.2482	25.8544	25.3707	39.3819	25.1455	22.8093	28.9178	26.0856	33.0205	30.2541	28.847	37.3586	21.4547
	590	141.766	79.9592	66.0476	109.36	67.0042	102.206	116.335	92.7289	82.8434	77.6065	77.2398	28.2495	31.7345	25.9573	30.4175	27.2861	25.2058	22.1841	25.7817	37.8224	24.4046	22.06	27.6834	27.0795	31.6449	31	27.9034	29.6707	22.7726
	592	137.989	75.2616	64.5055	100.147	66.0657	98.7562	111.654	80.4885	77.9243	70.2826	75.8256	28.4682	32.0452	25.4799	31.3393	28.3518	26.7928	24.5707	24.741	38.4686	23.2048	24.0234	31.2452	24.2124	30.3341	33.1741	27.8185	37.1021	22.9246
	594	147.889	76.8631	62.1791	103.475	64.1104	106.356	119.522	80.263	80.0865	81.6904	85.2616	26.8663	30.8913	27.6895	29.8003	29.161	26.5912	21.3515	23.1605	31.622	22.7812	20.9023	26.6706	24.9993	28.657	28.5127	25.5612	30.7827	22.9661
	596	140.677	79.7679	62.1309	109.48	64.3483	116.687	119.404	86.0202	75.441	76.4238	75.9102	26.1029	31.9235	25.3221	33.0376	29.5025	25.5309	23.8853	25.0719	31.7875	23.7079	24.7046	27.9754	24.8385	29.8565	31.3777	26.7211	38.1169	22.525
	598	135.726	76.6048	65.1622	102.283	61.1708	99.5925	114.532	82.7511	76.0405	74.5827	79.1913	30.1379	26.7688	25.1718	32.281	27.1635	26.407	21.7359	23.4264	32.8588	24.3264	21.2883	27.4157	26.6606	27.0856	27.9752	27.174	34.4686	20.1836
	600	135.783	82.412	55.1907	102.289	64.7492	88.8702	109.803	84.1167	71.1545	73.272	82.0136	26.1123	29.6024	29.5443	30.691	30.333	28.0754	22.8953	26.7478	39.5227	26.3139	24.4376	25.3584	28.942	30.1157	34.0872	28.7679	35.5226	22.3966
	602	131.446	76.4434	67.1072	114.192	68.0464	106.448	120.615	88.0477	70.5674	81.9156	77.7193	31.1713	28.7437	27.2024	30.1191	30.5772	27.1257	25.9836	26.5638	36.024	25.1916	22.7406	27.1319	25.9754	29.8465	29.1099	30.008	32.6981	22.7599
	604	143.653	75.2859	61.5468	100.27	62.8508	101.334	110.957	78.3572	76.2918	72.6545	79.6374	30.5534	31.2891	24.5871	30.429	30.0408	28.4894	23.725	25.6906	34.7373	22.1977	23.8914	27.0037	23.8963	30.1935	32.5634	30.3628	34.5639	22.5954
	606	135.973	81.9756	61.8811	94.6421	63.1838	100.555	118.692	76.2192	72.0071	74.9921	77.1211	29.8092	24.1859	25.9038	28.3399	27.4218	25.7001	22.5344	23.0338	37.0776	25.1747	20.9191	29.0742	23.8975	26.7777	29.2352	27.6544	33.0749	21.2969
	608	122.056	75.2089	61.0829	98.4413	66.3873	93.3139	104.892	75.9572	69.4724	76.0401	75.0559	27.0123	29.5598	27.0824	33.1074	28.3283	26.6875	23.8037	25.3706	32.389	25.3627	23.0539	28.9585	26.9257	31.9235	33.6756	27.2716	39.8964	21.2336
	610	124.579	71.3429	63.9261	100.156	59.9895	96.676	106.407	70.3585	66.9155	74.7402	77.7726	29.8692	27.5405	24.731	30.831	30.4111	25.9316	24.3222	25.1127	30.3186	22.4941	21.9455	30.5126	24.4609	28.0721	31.7986	25.7891	31.9686	23.8596
	612	119.478	75.8045	61.6223	99.46	59.404	100.43	116.242	72.7727	65.1983	77.2017	68.7099	32.5288	29.3141	23.449	32.2294	30.7109	26.9216	21.6386	26.792	36.6766	25.3804	25.2411	27.3421	26.0097	30.9025	30.4154	25.1831	35.5444	23.1663
	614	118.072	73.7171	56.5462	107.145	66.2244	97.9661	106.373	81.721	74.5191	66.6329	72.0237	27.4059	27.5315	26.9188	29.9808	26.8713	25.3805	23.0088	24.4333	36.1534	23.8027	19.975	26.0781	26.3734	28.5794	27.6764	28.3116	32.1153	20.9788
	616	121.631	70.7269	56.5012	97.2534	58.7382	96.6326	110.487	82.3265	72.0888	67.6983	71.4658	27.5792	28.0606	26.9118	31.7293	28.6102	27.2794	27.3709	24.2654	36.4406	23.5569	21.7693	28.1802	28.885	32.5313	32.1705	29.1656	32.3207	21.6964
	618	121.426	74.4317	59.1026	95.807	60.3585	103.069	103.373	78.4776	66.0249	68.8768	82.5014	29.5315	25.7518	24.2454	29.1455	30.5046	25.4408	23.221	24.4429	35.0666	24.3082	20.9626	29.5888	23.5331	29.9816	30.5513	26.4638	33.4438	23.2263
	620	116.709	69.6477	62.5247	95.9698	65.9849	94.7373	108.006	87.422	61.9797	69.689	77.0328	31.0321	30.4825	25.6547	28.4198	30.5484	25.0737	24.215	23.8462	36.6645	25.2999	22.4752	29.662	24.241	31.6534	28.5912	26.4507	36.3929	20.9234
	622	121.298	73.3869	60.4962	95.2643	58.0362	108.211	110.695	78.1951	69.8959	69.1474	77.9998	29.0339	30.3252	25.5549	31.0519	28.6662	25.1843	22.3701	25.045	35.4349	24.3085	21.4173	27.2961	24.7275	30.8042	32.6279	26.5211	33.993	22.2745
	624	112.201	72.6773	61.8843	89.1613	57.21	89.2997	111.279	75.6589	65.6241	66.39	72.603	25.0316	31.0353	24.8741	31.96	31.3104	25.0859	26.5477	24.323	33.6085	24.8033	23.7206	29.7587	22.994	30.1828	32.9643	24.6522	33.4004	23.4976
	626	111.949	78.3578	57.4604	89.0606	61.0376	104.396	108.508	84.5065	68.6097	71.4625	67.9643	26.974	28.4658	24.274	29.3193	26.9239	23.8516	27.9585	22.2853	37.9011	22.4505	21.9101	28.0691	24.1188	26.0982	32.2334	27.0138	37.9703	20.804
	628	111.934	71.2431	58.3012	100.457	60.098	87.8431	100.636	76.7153	65.8905	73.4133	78.4481	28.157	35.1238	28.3979	33.6796	30.7176	26.1229	26.0708	27.9288	39.9118	26.9335	25.0352	26.0306	26.8623	28.8433	32.2982	28.7518	36.8026	23.5806
	630	104.004	62.9661	55.2833	94.7263	58.7768	96.998	95.3686	73.4906	68.0334	66.3706	73.0269	26.7403	27.788	25.8032	31.0349	30.0223	27.4805	24.3115	26.0577	43.5007	23.0713	19.9754	27.6191	28.2605	32.1186	31.7994	28.3909	32.7981	22.5182
	632	109.74	61.9838	58.1612	92.8909	61.9218	100.195	88.2559	76.5361	67.2444	66.9996	67.569	30.8815	31.86	25.7704	32.4623	30.4354	25.2969	24.0482	26.9549	47.3088	25.0071	22.997	29.5893	25.6668	32.391	32.335	28.0596	37.1614	24.3835
	634	107.474	66.3201	56.1128	99.2163	52.6509	95.2699	94.4687	72.543	67.1036	69.4279	64.7724	33.5203	31.1065	28.8122	33.9816	33.8799	27.1898	28.472	26.7282	55.122	23.8773	22.9252	30.0057	26.8041	35.3165	33.4374	30.443	41.5992	24.1663
	636	110.67	73.1945	57.3041	93.5918	55.8567	94.7709	94.2319	74.841	66.4727	68.5068	66.6394	37.5567	34.1073	29.1123	35.1644	31.679	30.7263	28.5932	29.1632	55.5801	27.8817	28.0933	30.9042	27.7275	31.1357	34.3004	32.3771	41.7612	25.3135

## Sheet: Figure2H-2J
NS shRNA	21.0825	20.6713	21.5174	21.2028	20.4612	21.1141	22.4008	23.5368	22.8786	20.5743	21.9539	22.5433	21.3647	24.1714	22.1829	19.8757	21.1879	22.4094	20.9819	23.1023	22.0323	20.8763	20.3446	19.9024	20.0366	21.1936	20.1275	20.0539	23.9063	22.7695	21.9327	22.5695	22.1781	23.4021	23.691	22.4595	22.8776	25.2216	24.2891	25.3476	27.6353	25.2258	29.1773	26.9719	27.5285	28.5562	32.0255	33.4936	31.0811
	21.4905	21.863	20.6571	21.8878	19.5235	21.4166	21.2853	22.7929	21.7871	21.9729	22.4995	21.923	24.6497	21.5094	22.779	21.3706	23.0924	21.0703	22.1071	20.9302	21.1418	23.2128	22.1166	21.3176	23.1611	21.5855	22.0686	22.5528	23.2005	23.2819	22.6156	22.4665	24.5689	27.6908	25.079	27.0327	26.8313	28.4573	31.9464	31.693	32.287	30.3067	32.2527	34.7506	32.7473	33.9236	34.2115	31.3102	37.7797
	20.8376	21.9406	21.1488	18.7244	21.6573	20.9246	20.3972	21.9293	21.0504	20.791	21.8221	22.3529	20.28	21.8029	22.8341	21.0281	23.5898	22.1701	20.4812	20.4535	21.8821	21.2148	20.2044	20.1658	18.2729	19.8174	21.2115	21.5526	22.4074	23.1795	21.0211	23.322	22.0428	23.2519	25.6684	29.1593	28.0671	26.7924	27.0727	28.023	31.4448	33.5686	36.22	35.0236	34.5069	35.4101	39.313	34.1299	36.7095
	19.7836	21.4125	22.4541	20.7448	22.2717	21.4439	20.9313	20.1768	21.5559	22.1996	21.899	21.6061	20.0452	22.2141	21.375	21.8042	21.66	21.7434	20.2446	21.6889	22.3786	23.1843	22.7398	21.7192	20.5833	22.0232	23.5315	21.0957	22.5495	23.3557	23.5505	20.9676	21.7272	22.909	22.6371	23.6104	24.636	22.7632	24.8909	26.2649	27.7705	26.5764	27.5432	28.6369	26.934	27.8579	31.7626	31.0101	29.3367
	19.9257	22.517	20.2105	21.0457	22.3317	20.1315	19.9869	21.0987	20.9239	20.8267	20.6487	21.9753	21.3742	20.6152	20.2032	20.894	20.9445	20.2724	21.1672	20.5337	21.1931	21.0504	21.2763	21.1542	20.3693	22.2751	21.0637	21.8135	23.6083	23.1618	22.0141	21.1513	22.2631	23.6451	22.3797	25.0729	25.1498	24.3345	28.4975	27.3431	29.3366	28.8164	28.8343	30.2091	30.0632	33.4101	35.3233	30.4055	30.6451
	19.9523	20.784	20.7483	20.0559	21.6308	19.5528	20.8239	20.5479	20.2689	20.1159	19.6514	20.8842	21.3029	21.0433	20.3939	21.6097	20.9746	20.8881	20.6631	21.5335	21.0771	19.9376	20.2005	21.153	19.9969	20.5101	20.3613	20.103	20.9464	23.3135	20.7979	21.7673	22.1413	23.5069	23.0651	22.9689	24.1909	24.8967	26.3755	28.1899	28.0376	28.4997	30.2174	34.0723	29.5696	31.4974	33.5414	31.6314	31.1737
	19.6904	19.9654	20.3242	20.4575	21.0805	20.339	19.4026	21.7231	20.2406	20.3428	20.5603	20.9581	19.6458	19.5846	20.1659	19.5021	20.2253	19.9626	19.6236	20.0923	19.9867	19.8014	20.457	18.8922	19.2882	19.5961	19.3093	20.3841	21.2759	20.6523	20.9122	20.8389	21.3286	21.7016	21.6616	21.8137	22.9004	23.7025	25.0071	24.357	25.8857	25.3344	27.753	28.587	29.3971	29.8019	31.6917	33.9279	32.5892
	26.4901	27.3001	28.5001	26.8879	27.5888	27.2526	27.7832	28.0371	27.1694	28.0677	27.989	26.5722	27.5612	27.6611	26.6864	27.3989	28.6903	27.957	27.6764	27.7909	27.0274	27.3954	28.4021	25.9819	28.261	28.4334	28.6505	29.165	28.7513	30.2024	29.529	30.1806	29.3911	30.0232	30.1603	30.4954	32.0655	31.8237	32.899	32.1384	33.4336	35.5873	33.8992	34.8714	35.5823	36.5584	36.6688	36.7287	38.8199
	26.5371	27.5391	27.6669	27.2446	28.3912	27.9749	27.4187	27.8101	27.8664	26.9011	28.2353	27.9599	27.5895	27.8125	27.7106	27.8414	27.9818	28.1447	27.6857	27.0326	27.8997	27.8611	27.9892	26.7455	27.3119	27.6126	27.7163	28.8875	28.0828	29.7205	28.7809	28.8912	30.1648	30.5208	32.2924	32.1684	34.605	34.8737	35.7929	36.8166	35.3796	36.0554	37.4199	38.587	38.1917	38.5612	40.6651	40.7984	41.171
	18.5902	21.041	20.7022	20.9307	19.6905	20.1311	19.3768	19.6977	19.4274	19.7861	20.6938	20.6054	19.9173	20.1468	19.7469	19.9263	19.0989	19.4248	19.9432	20.5446	20.0398	19.548	20.552	19.3223	19.2697	20.3431	20.1363	20.0358	20.5196	21.209	21.274	21.3116	22.3615	22.4405	23.4343	23.3931	24.759	24.5773	25.1605	26.8941	27.1761	27.8649	29.4853	28.4468	29.3295	28.9562	32.1729	30.5374	30.4091
	29.6256	30.9017	30.5127	30.205	30.7737	29.4578	29.7337	29.5238	30.2979	29.0396	30.9891	30.563	30.5112	29.6357	29.353	31.0388	30.9168	29.7245	29.7226	31.5652	30.5019	29.9448	30.0833	29.5088	30.4263	30.1252	32.2352	30.4919	31.0544	31.5682	32.9814	33.3364	34.1571	35.239	35.6591	34.9717	37.2701	35.8722	38.3874	39.6797	38.9169	40.8289	38.729	41.6331	41.5616	40.7458	43.6854	41.3558	42.3467
	31.4584	33.7305	33.1647	32.3715	31.4934	30.1183	30.8342	31.7517	31.0604	31.9675	32.0068	31.6405	31.3385	32.4338	30.7928	33.3458	32.3922	32.2699	31.8691	31.6169	32.2474	31.322	30.8867	31.3099	31.1797	32.0604	32.4532	32.9786	32.0712	32.9213	35.5169	34.6899	35.8703	36.9614	37.3042	40.287	39.9852	42.2815	40.6684	43.9329	44.6702	44.6279	44.8783	46.7452	46.8178	45.4896	46.3239	48.7424	49.3533
	22.3034	23.8146	22.9683	23.5584	21.7351	22.8359	22.5798	22.207	22.5422	22.926	23.5903	23.4065	24.8826	22.4369	22.5542	22.5099	24.1678	22.4028	22.9303	24.1459	21.3476	23.1655	21.7422	23.0544	22.3792	23.8156	24.0307	24.6315	22.2626	26.4471	25.3844	24.0513	25.2287	25.5563	27.5699	27.1152	29.1049	29.3956	32.2164	29.5006	32.173	32.5351	32.6206	37.5954	42.7189	37.86	40.5766	40.2795	45.1774
	18.9935	19.641	21.0157	20.9271	21.1334	19.6995	20.4714	19.9049	19.6715	19.9921	19.6956	19.9747	20.0929	20.6514	20.0948	19.9798	20.7925	21.3722	19.6025	20.4645	20.5011	21.0643	21.0761	20.2949	19.8223	21.3591	20.9337	21.7154	21.7407	21.7286	21.9775	23.0051	23.841	22.9509	24.5594	25.8886	25.3362	27.8968	28.2668	27.6454	28.739	29.3107	29.9632	30.1842	31.7946	31.1225	32.6612	34.1209	33.8923
	18.272	21.4906	20.4015	19.7633	20.0179	18.6501	19.4772	19.9558	18.95	19.2551	19.5413	19.3554	20.8683	20.1492	19.3768	20.8061	20.6573	19.1678	19.5045	18.7503	19.317	19.7404	19.4354	19.3288	19.3151	18.8499	20.6514	21.0173	20.9933	21.8256	21.8811	23.3533	22.9901	24.5342	25.0318	25.6204	26.1917	28.6114	28.6766	30.0791	32.4703	32.9462	32.8572	35.9779	35.2515	34.0838	33.1716	36.3805	33.7683
	20.4647	20.7829	22.027	20.417	22.6388	20.2184	19.894	21.4818	20.4706	20.5938	21.1066	20.8144	20.8435	20.4712	21.016	22.2308	21.0705	22.3248	21.6154	22.0165	21.2075	21.5194	21.9536	21.772	21.3725	23.6661	23.2673	23.4283	24.8671	23.5742	25.388	27.6921	28.3514	29.6621	33.7704	35.1716	38.9294	37.8234	41.3104	45.5067	40.0199	45.7797	47.923	46.658	51.5902	51.0851	49.9687	47.8392	51.6385
	19.3264	20.9227	19.8517	19.977	19.206	20.7187	18.7896	20.3397	20.6354	19.608	20.0146	19.4715	20.333	20.3558	21.4769	20.5386	19.8427	20.9473	20.4945	20.605	19.2322	20.7652	21.5689	19.7819	22.7066	22.861	21.4928	22.9381	21.2167	23.455	22.5481	25.741	25.8838	26.7801	26.9989	27.9815	29.7633	35.3229	33.432	29.5192	33.3799	33.4219	38.3656	36.5723	40.656	37.1612	42.4798	43.7434	43.3006
	18.9058	18.0882	19.1404	17.428	19.2624	19.4112	20.8022	18.5198	18.9347	20.4115	19.8698	19.0059	18.5739	19.3219	18.3542	18.384	19.2463	17.641	17.5913	19.4581	18.5577	18.895	19.5571	17.9672	18.3399	19.6509	20.0679	19.9869	21.3601	20.8335	23.4318	24.3129	23.3879	23.8623	25.1762	23.6133	27.1845	29.5164	29.3967	27.8431	27.6998	31.8955	31.2858	29.2458	35.0722	30.3376	38.3888	35.853	36.1732
	23.5237	24.6568	23.7135	23.9076	24.7639	22.9756	24.261	24.5885	23.2006	24.7326	24.926	22.9112	23.4044	24.3949	23.9736	23.7235	25.8114	26.2585	25.8757	25.1361	26.3194	23.3803	24.1654	24.2757	23.8305	23.2448	22.7326	21.9122	24.8651	25.2566	24.8206	25.3559	27.1492	27.15	31.0728	30.7946	32.6979	35.9737	33.4205	37.8358	35.5726	42.1913	36.7369	43.2501	39.7156	39.695	41.1156	42.6056	46.5471
	21.6356	21.4291	21.0666	20.5563	21.7043	21.6404	21.3641	22.1719	21.538	21.2063	20.4463	20.5728	21.1772	21.2023	20.903	21.266	21.1209	21.7629	21.5442	21.9197	21.1094	19.5823	21.71	21.0744	20.7235	19.9538	21.4789	19.5434	21.131	21.078	21.5651	21.8831	22.4991	22.872	25.403	23.8921	24.4098	26.6201	25.8006	26.7367	26.9697	29.0783	28.4309	29.9026	30.3031	29.446	32.5953	32.7252	32.4504
	19.8784	21.3688	20.5008	20.8736	20.4653	20.5399	20.1297	20.9511	21.9736	21.6966	20.4983	21.4644	20.8037	21.2687	20.5939	21.5076	20.0485	22.1109	21.5522	21.339	20.8337	20.7441	21.2938	20.0375	19.4829	20.0895	20.5079	21.4501	21.2662	20.0692	20.9678	20.6312	20.9444	21.1914	23.6843	24.6453	23.8188	24.605	23.1782	24.6977	26.794	26.6864	25.1333	27.2205	27.0268	27.9037	28.3483	27.5185	29.732
	23.1972	23.6273	24.3537	25.1673	26.8666	24.6842	24.3855	25.286	25.7854	26.4129	26.0838	26.5084	24.7638	24.0434	21.992	25.6678	21.6276	26.6173	24.9433	23.9277	24.0475	21.4683	22.7019	23.2791	24.7219	25.6374	27.1426	25.5127	27.0806	26.1868	29.8999	29.3635	31.0611	32.2026	30.7135	35.3847	34.3577	33.1754	36.3031	35.3096	36.469	38.6386	36.4166	41.987	44.5199	40.147	40.6354	40.2867	42.6572
	22.8554	20.6681	20.6524	21.317	21.1851	24.3554	24.4982	23.5703	26.5953	26.4718	23.6277	23.2125	25.2044	23.204	24.2808	24.2425	22.5225	20.692	24.172	23.8495	23.1434	21.6858	24.2487	24.9835	22.1009	22.1642	23.0233	29.7345	21.9535	32.0803	29.1745	33.6377	34.1779	39.8166	37.8485	38.0161	41.1884	46.4667	40.3589	50.3058	48.54	46.8293	50.035	54.2037	52.13	57.7166	50.3666	48.0703	52.4966
	24.4186	24.3068	24.7299	23.1881	23.5984	25.3097	24.878	26.744	25.287	24.0544	25.1375	24.0102	25.2156	22.8473	25.5192	25.6371	25.454	25.1781	27.6236	25.0877	23.4377	26.5132	26.5084	24.6914	20.9337	20.9379	23.9073	26.7754	25.189	29.4975	29.5989	29.6471	35.8422	37.1396	39.1663	42.4827	37.6535	45.911	45.8395	49.1142	54.8223	48.5252	41.0297	48.0713	42.7855	50.4957	50.2666	48.1913	51.1265
	23.7411	21.8032	22.2505	21.6437	22.4642	23.9277	24.1354	22.5115	24.0668	23.9818	22.9385	22.7063	24.3763	22.2877	23.4802	22.5458	22.3674	23.0085	23.8645	22.7683	23.1565	22.3848	23.8987	23.2302	21.5563	22.6649	21.8708	24.9502	23.6362	27.8847	25.524	30.6416	29.5927	32.6654	30.8919	34.1694	38.9107	36.93	37.2624	39.6958	47.0167	41.6855	44.1618	48.1475	49.3444	46.4663	52.352	51.9776	52.9124
	25.188	25.4513	23.571	23.7539	24.1429	24.8648	25.7332	24.6941	25.074	24.1482	23.8076	24.8511	25.2574	23.5073	24.8068	24.6637	23.2962	25.3685	24.6457	24.9201	23.9801	25.1172	24.4464	24.8297	24.0641	25.3989	25.0899	25.9428	23.7598	26.5391	25.8707	27.3567	25.783	28.5223	27.26	26.9049	28.6498	27.6727	28.3236	28.9195	30.3544	30.7036	30.4664	30.6081	31.5374	34.1261	32.6162	33.1451	32.847
IP3R1 shRNA+IP3R1	26.0145	26.141	25.6214	25.3594	26.9303	25.827	25.3158	26.3274	25.6741	25.8285	25.2808	25.6779	26.0007	26.5821	26.3334	25.7437	25.9552	25.8511	25.5532	26.043	26.7692	25.5357	26.3099	25.4422	26.011	26.28	25.9543	26.346	26.5052	27.816	27.1221	28.6282	28.5715	27.3438	28.6379	28.8259	28.9515	30.7556	30.9535	29.742	31.2546	32.3048	31.5121	30.9986	32.1623	33.7529	33.8101	33.4004	33.6392
	29.5448	29.1962	31.1022	29.7721	30.2948	29.1703	29.3943	29.6136	29.0211	29.114	29.6203	28.8604	29.3342	30.051	29.6055	29.9887	29.3558	30.2633	30.2919	29.934	29.3321	30.3453	30.7137	30.3773	28.269	28.327	27.9322	28.5359	29.0708	31.2777	30.7714	32.1169	32.7474	31.6791	32.445	33.6702	33.1338	34.8881	36.4832	36.1956	36.2256	38.2524	37.8937	37.5141	40.4511	38.7889	40.8908	40.6821	41.1691
	21.2597	21.2426	22.4584	21.9873	22.4207	22.4515	21.4892	21.693	21.4934	21.0763	22.063	22.2361	22.1531	23.4178	22.9261	22.7664	22.1033	22.4725	22.0464	21.7275	22.7991	22.7156	22.1242	21.9123	21.9629	24.2385	22.7815	24.332	24.7603	25.818	25.8418	26.5093	26.9709	27.235	28.4517	29.0838	29.5233	31.1171	32.1169	32.7444	33.3717	33.4689	33.7541	33.2363	36.2985	37.0395	36.3814	39.5584	38.4273
	25.8329	27.0271	27.7008	26.59	26.8526	26.7226	25.9266	27.7772	26.642	25.9153	26.7576	25.9702	27.6699	26.7271	25.7063	27.2631	26.4494	25.1291	26.8054	26.2743	26.1338	25.8528	25.9182	26.7698	26.767	27.8106	27.7461	27.6458	29.7568	29.3385	29.4155	31.9661	31.3628	30.4744	32.7736	33.0192	32.1182	34.1081	34.2656	34.3298	36.2838	37.0694	35.6307	37.6083	36.4906	37.7115	37.2398	39.0401	40.556
	22.9807	22.8721	23.7797	22.9546	23.4646	22.7496	22.5563	22.8468	23.0996	22.5275	23.1019	22.7982	23.26	24.4421	23.4599	23.1904	22.6482	22.272	23.9191	22.7008	23.1311	23.6572	23.7176	22.8769	24.0351	24.2799	24.7931	24.9606	26.4621	27.4264	27.2663	28.3688	29.9583	30.3081	31.847	32.1111	33.905	35.4999	36.3407	35.3411	37.8659	39.445	39.5117	40.4841	42.3241	41.407	41.7255	46.778	44.0963
	20.0644	20.6198	21.4135	21.1202	21.4324	21.3248	20.3766	21.8966	20.656	20.8641	20.5381	21.8628	20.9061	22.7922	21.8158	21.4832	20.339	20.6421	22.1687	19.5766	19.908	20.1675	20.802	19.4814	27.925	23.9839	22.4308	25.5876	24.3425	27.7275	25.5146	29.4218	27.6493	25.8793	31.1382	29.1969	30.4739	32.2742	31.9083	31.211	31.3528	33.7383	34.2974	37.0821	37.574	40.6513	34.367	30.8971	32.0541
	20.7289	21.0125	21.1222	21.9967	21.448	20.7678	21.0489	20.9681	21.01	20.6301	20.7406	21.3704	21.4357	21.7931	21.6676	21.6829	21.4125	21.4076	21.0797	21.3948	21.559	21.7013	21.3508	21.6692	21.5414	22.0628	22.0354	21.8223	23.1573	23.249	24.4432	24.8864	25.6638	25.1342	25.9255	26.1777	26.7838	29.4191	28.7728	28.3161	30.8274	30.9572	30.269	31.3781	32.6313	33.1296	34.8538	34.8719	34.847
	23.7163	23.9303	24.4875	24.4405	24.7285	24.1408	24.9237	24.6795	24.0789	25.1752	24.7073	24.0987	24.1174	25.2156	24.6464	23.8302	24.6468	24.8255	24.2603	23.3198	24.5915	25.0348	23.1979	24.4115	24.4113	25.7904	25.5292	26.6514	26.3448	27.8175	27.7937	26.7862	30.1779	28.4257	31.1444	30.7704	30.0874	33.0845	33.3276	33.0481	36.0813	36.7729	35.6474	37.6288	40.5079	37.8374	39.5314	40.1759	41.3202
	20.5292	20.3063	19.4604	20.0282	20.3804	20.5943	19.6318	20.3278	19.9827	20.3306	20.0231	21.2653	19.2464	20.7888	18.9958	20.6778	20.3426	20.4705	20.302	21.4827	19.941	19.119	19.3957	19.5654	24.153	25.3079	26.3231	28.1659	29.8158	28.4591	25.1123	28.0585	31.6864	31.0089	27.6719	27.4991	28.426	27.777	26.5259	27.424	28.0599	27.5766	29.3522	28.8002	24.3825	26.0274	27.6901	30.2402	29.7308
	24.2672	22.9483	25.214	24.7471	25.8089	25.0251	21.4044	24.6998	22.9109	23.9734	23.4688	25.1548	24.2711	25.7903	23.402	25.3671	23.4105	25.4526	24.2771	24.9681	22.7777	24.5537	24.3415	24.2354	22.1414	21.6824	24.0543	23.0955	22.9365	25.0762	24.6147	25.0045	28.2149	27.5057	28.2978	31.1464	28.9446	32.7541	31.452	31.9611	32.6764	32.387	33.9566	33.6363	37.0744	36.3174	36.3886	35.9477	37.6682
	22.7483	23.3552	23.531	22.6488	22.4757	23.3472	23.6815	25.0359	22.3616	23.0002	22.9848	25.0404	23.3293	23.5632	23.2153	21.8736	23.1246	24.0297	23.2174	24.6687	23.5779	24.4381	23.0698	23.2783	24.7248	23.7717	23.6418	25.483	23.7871	27.2479	27.4028	29.3958	28.4715	29.6306	31.8613	33.3053	32.9898	35.412	37.3563	34.9507	38.0089	37.5837	39.481	38.7224	40.3343	38.3463	43.8326	39.5343	41.6248
	18.6144	18.9816	18.5197	21.028	18.9237	18.6792	20.0397	20.1486	18.0414	19.494	19.1055	17.9202	19.752	19.4889	17.6508	19.4968	18.3914	19.6786	18.664	20.6861	20.2679	18.5949	18.6047	18.5292	20.1743	19.1109	18.4518	20.9444	19.5019	22.3484	21.6529	23.0682	22.7759	22.3548	23.103	25.7938	25.1035	25.617	26.7242	25.3501	29.4402	27.7427	29.0527	31.1285	30.4279	30.8533	29.9944	31.1599	31.6471
	21.9055	21.0788	20.8327	21.3262	22.5794	21.6111	22.1854	21.9347	21.3982	22.5017	20.8513	21.3934	22.2088	20.487	19.6827	22.7175	20.0632	21.2143	20.4155	21.3578	20.3775	21.0492	21.7321	20.9662	21.4877	21.0659	20.918	21.337	21.0017	21.8985	21.1073	23.2164	24.4258	25.608	24.8301	26.6798	26.3573	27.9237	28.2946	29.0367	30.4262	28.2549	29.2324	33.7328	33.0094	29.6567	32.1323	33.8928	30.7169
	17.8498	17.823	18.3181	18.1309	19.4576	17.202	18.6105	17.7289	18.2194	18.6583	17.8305	17.8219	19.6846	19.569	17.5856	18.2078	17.4045	18.3451	18.33	20.3895	17.3843	17.5326	18.454	17.389	18.5631	17.1638	19.3121	18.9117	18.1433	19.3454	19.8967	19.8129	20.3726	20.8753	19.541	22.3027	21.9073	24.3663	24.3087	23.475	24.0093	23.1907	25.1714	24.9079	25.2387	25.2127	25.9514	26.0915	24.4881
	18.7044	18.9995	18.16	18.1653	18.5574	17.4872	18.7807	19.1089	19.1849	18.0679	17.9253	19.603	18.9964	19.0266	18.5549	18.5126	18.1712	18.9123	18.8528	19.2096	18.8886	19.375	17.9402	18.4273	18.2814	18.8072	18.6121	20.6759	19.2098	19.2138	19.0328	19.5648	19.7769	21.1673	21.2462	22.9798	22.8112	23.5324	23.6594	23.8381	23.1191	23.9209	26.809	24.4158	25.5352	24.794	24.6449	27.2117	27.0544
	22.1942	21.5624	23.2487	21.9435	21.944	21.2188	21.396	22.5025	21.9178	22.2709	21.1999	22.456	21.6317	22.3291	21.251	21.5684	21.2476	21.2723	20.6306	23.1183	21.4673	20.7541	20.4269	20.9386	20.6328	20.4184	21.5687	23.3526	21.2085	23.8799	23.3641	25.1034	24.7733	25.7916	25.683	26.4813	28.615	29.4735	28.3815	28.6791	29.3366	28.5772	29.4291	31.1197	30.9406	30.7808	30.2783	31.2368	31.9306
	22.383	22.8273	22.1168	22.51	22.2572	22.6372	23.0454	21.8212	21.3647	21.1311	22.2394	22.4347	21.4115	22.9731	22.3724	21.4534	20.8636	21.8747	22.6174	23.2233	21.9122	23.467	23.2156	21.5167	22.195	22.74	21.9891	23.1274	23.0832	24.6493	24.49	24.7369	27.2446	29.2459	28.525	28.2335	29.2466	29.9871	30.4593	30.9507	33.0377	31.269	33.2493	32.7816	33.558	32.526	36.8941	35.2592	33.8968
	21.8474	22.7082	23.3107	21.9538	23.1352	21.053	23.9445	21.2865	20.2945	21.339	22.1859	26.2875	25.8691	23.8272	21.1224	24.0494	21.5886	22.3728	23.3701	29.2417	26.6018	26.0562	24.9207	23.7142	23.9546	26.445	22.3832	27.0119	23.8394	26.4104	24.0709	24.3894	25.4115	26.77	29.6037	28.2923	30.0382	29.6431	31.9099	29.5142	33.293	30.0302	31.9151	31.9531	31.3314	35.353	32.3193	32.4121	33.2928
	24.6315	23.7183	24.2654	22.7159	25.3829	23.2714	22.1347	21.7889	22.9479	23.6348	23.4699	24.3739	22.4412	23.8703	21.7189	22.6384	21.982	23.5363	23.6849	23.1693	22.4487	22.904	24.141	23.6904	22.1121	19.9707	22.7668	22.9618	23.4974	24.548	22.5394	23.0176	25.0854	26.5608	25.3528	29.3307	27.9969	28.0788	25.1584	26.3032	28.5488	30.5218	28.0454	31.6492	28.8484	30.9776	31.052	31.5919	31.3548
	26.4791	30.1298	29.8282	24.8506	28.4691	28.5165	27.1893	26.5004	25.785	26.0728	27.7724	26.2149	29.7197	27.4434	25.842	27.799	22.0424	24.5987	24.9905	27.2679	26.1207	26.0984	25.1214	26.2183	27.0133	24.3409	25.4453	27.8648	27.0067	25.8783	27.1708	26.4418	28.0757	30.0175	28.9915	32.4385	35.5456	34.7071	34.1515	39.5785	35.0093	40.4327	42.4503	42.2166	40.5174	44.0225	36.5718	47.3044	46.5577
	21.302	20.7561	21.4779	19.5244	20.9106	21.5603	19.4636	20.3897	20.8361	20.7163	20.99	21.257	19.8804	20.7276	20.3418	20.777	20.6679	20.4157	21.1222	20.8563	20.4066	20.2479	21.2232	20.7706	20.4454	19.8011	19.8052	20.3199	21.0782	20.9413	21.3922	22.4607	23.555	22.5846	21.9806	23.6982	24.5228	26.5715	24.4616	25.0943	24.8262	25.9619	24.9559	25.1784	25.0843	26.6832	26.5494	27.8151	26.3803
	21.6397	20.3051	20.8578	19.5704	21.4488	20.376	19.7083	19.938	20.9188	20.4789	21.2711	20.5041	18.927	21.2946	19.3509	20.4714	20.9242	20.2853	19.6835	21.0207	20.4284	20.2937	20.6274	19.8662	19.575	20.1297	20.0921	19.9225	21.435	21.156	21.9206	21.855	21.7445	22.7327	21.5092	23.6189	24.5503	24.204	24.668	24.9469	24.6289	27.2661	25.1683	28.2119	27.6258	27.8565	29.2137	28.9196	28.5045
	21.0124	21.3888	22.1841	19.9989	21.9519	21.9909	20.2571	19.5417	21.4112	21.5831	20.4448	22.9535	19.5738	20.3764	20.161	21.0896	19.3159	19.5664	20.6625	20.9892	19.5141	20.1438	20.0621	21.4606	19.073	18.3505	20.7251	20.6119	20.4248	19.6533	20.9335	20.9595	21.6412	23.1642	22.5087	23.6291	21.8101	24.8249	22.8892	24.9653	22.985	25.805	26.5025	26.8793	26.4587	24.9036	29.1502	25.9344	26.721
	19.7919	19.0304	21.1761	19.1697	19.3357	19.643	19.3954	19.1498	19.5345	19.0926	19.3552	19.3149	20.3057	19.8798	18.3343	18.7078	19.3063	19.7295	18.4993	19.6019	20.1531	19.6811	19.2595	20.3618	18.3648	18.7891	18.8113	20.2549	19.2474	19.8802	20.2878	20.0762	21.5226	21.1199	21.9067	21.9392	20.9444	22.6328	21.3344	21.8892	23.0817	24.2264	23.3062	24.995	23.4475	25.8141	25.779	26.7504	26.2581
	19.2827	18.7937	20.7995	19.6255	19.7477	18.8132	17.5942	19.2373	18.4834	18.7072	19.8334	19.8556	19.3785	20.3118	20.0814	20.2404	18.9297	20.8556	19.1606	19.4528	19.6905	18.8988	20.0183	18.9382	19.0759	19.2081	18.9961	20.4812	19.9721	19.8075	19.4223	22.1218	21.9765	21.8848	22.4034	21.6712	21.6223	23.7343	21.5272	22.3163	22.1875	25.0822	24.7881	24.4834	24.3513	26.1282	25.0169	25.1004	26.86
	22.1161	21.939	21.5565	20.0595	21.4443	20.6458	20.4927	20.7079	21.1369	20.9781	21.2472	20.9515	21.2098	21.198	20.399	20.8207	20.954	20.93	21.4719	21.874	20.5585	21.459	19.7503	20.5176	20.4008	20.6038	19.7774	21.8358	21.6982	21.5232	20.8638	22.6723	22.77	22.5248	23.2324	23.4428	23.8764	23.5215	22.9851	24.3552	24.4128	27.8907	24.8551	25.3126	26.8172	26.7143	26.4885	27.8183	26.3846
	21.6599	22.2189	22.707	20.3257	19.9024	21.6929	20.194	20.5575	20.9902	20.9902	22.4729	20.4924	20.1848	20.4124	21.3871	20.9752	21.083	20.0111	21.2928	20.9151	20.1586	20.785	20.4278	20.5146	19.4879	20.858	20.7935	20.6267	21.1774	20.5668	21.4154	21.9591	21.9099	22.6748	22.342	23.649	25.4121	23.9994	22.9252	25.8265	25.9162	27.0842	25.7796	26.318	25.8554	28.0241	28.0671	28.6351	27.6167
	21.975	21.1537	22.6482	20.6464	22.2407	21.3082	20.9042	19.9332	21.6781	21.6101	21.493	21.7207	20.7008	20.4879	20.7485	20.7702	21.3706	21.0931	20.3851	20.4102	20.82	21.7555	21.7522	21.3732	20.6103	20.6006	20.8023	21.1352	20.9606	22.2377	20.7242	22.2941	23.0935	22.1327	22.4483	24.079	23.2387	24.8626	24.3592	23.3274	25.8664	26.9124	27.0072	27.7649	26.0483	27.5291	27.7845	27.8117	28.2609
	23.5387	23.6558	24.3581	23.5524	24.65	23.7644	22.5316	22.2187	21.9057	22.6433	22.2863	23.1697	22.9869	23.404	22.8827	24.1698	23.3304	22.7689	22.881	23.3216	23.4238	24.3604	23.7976	24.7514	22.7613	22.7792	22.4948	22.9609	24.585	26.5043	24.5251	26.0901	26.4049	26.4281	27.243	29.5114	29.2265	29.1983	29.5647	31.4158	31.509	32.6157	32.3476	32.3852	31.1497	32.8895	35.2298	34.5981	34.3903
	19.4646	19.1705	21.8665	18.9257	19.768	19.3733	19.28	18.625	19.1601	20.4216	20.1779	20.5892	18.9138	20.0935	19.7902	19.6638	19.0017	19.319	19.5098	20.162	19.7238	19.9693	20.738	19.9919	19.8844	20.3315	18.698	21.0741	20.8836	20.3526	21.019	21.4487	23.4642	24.5201	22.7169	22.4314	23.9768	22.488	23.5311	24.4504	25.2657	25.641	27.4011	24.8305	25.3557	26.3552	25.8354	26.5938	27.1544
	26.5721	24.9164	29.1978	26.4247	25.9233	26.6898	24.5843	27.1247	25.213	24.3167	23.9686	26.9551	26.0812	24.0967	23.818	26.9878	25.9769	25.702	26.356	23.037	26.1509	23.6416	25.3988	23.3749	22.2977	22.7624	26.7351	24.7879	24.6791	23.4888	24.6692	24.2361	25.1297	25.4521	26.0045	25.669	28.7856	28.6661	27.4745	26.5213	30.4009	30.7851	28.6773	28.3032	31.4395	30.7327	32.0534	31.495	30.562
	22.5162	21.863	21.615	20.887	21.9418	22.0196	20.962	21.6004	21.9141	21.7631	21.2424	22.7342	21.4336	21.4051	21.4379	22.1808	22.303	21.7182	22.7066	22.9071	21.135	21.5061	21.3262	21.0742	20.0207	21.044	21.0601	22.4298	23.8167	23.04	22.1936	24.2801	26.1279	25.8341	25.7227	26.017	25.5211	27.6697	26.3431	29.2917	27.2679	31.7538	31.2886	30.477	31.4221	31.0654	34.576	32.9348	31.8549
	22.0899	21.6966	22.29	22.1411	22.8396	24.6949	23.0061	22.4183	23.4466	21.1592	23.3993	22.9987	22.3011	23.7222	22.4664	23.1086	21.0678	22.6255	23.1588	21.6713	23.3528	21.1552	22.8949	21.8332	21.3746	22.4417	20.557	21.1229	20.8981	24.9832	21.2281	22.6001	23.8008	25.5101	24.7141	24.4114	26.7476	26.3703	25.606	25.7614	25.4546	28.4305	25.8382	29.6467	28.7043	27.8914	30.6003	29.1362	30.107
	22.2652	19.9053	21.081	18.8496	19.227	19.3625	21.1684	21.2915	21.4811	20.6342	19.9936	21.1141	21.9598	21.0653	20.2074	20.9158	18.6339	20.8647	22.8862	20.9909	20.3758	19.1608	21.1295	18.6456	18.8419	17.641	20.0495	21.3439	20.7602	21.5228	23.9582	22.3727	26.2374	25.434	26.6956	27.3718	26.8457	27.6451	29.5116	31.7433	31.8312	33.6791	31.4018	29.9492	30.2568	31.0322	37.5998	36.7805	36.0649
	19.9969	20.9101	20.261	21.5074	20.6083	21.9457	20.3805	18.9167	20.3827	20.8682	19.9686	21.4399	19.6018	19.4863	19.8577	19.8236	20.8881	19.8274	21.6867	19.3874	21.1137	20.1504	20.8551	19.1792	19.4752	19.5705	20.6921	20.6494	21.4828	22.6517	21.3856	23.5112	24.4129	23.2672	24.0876	26.4375	23.2307	24.4331	24.3999	27.7169	28.5888	27.132	28.0679	28.9443	29.0606	28.0832	28.6943	31.7225	28.9635
	20.9864	20.5641	20.3652	19.1592	19.6146	20.1747	18.7159	19.5073	19.2172	19.1324	20.7385	20.4874	20.8837	19.963	18.5615	21.0027	19.5847	20.4495	20.0398	20.6989	20.2502	19.933	19.9216	18.6362	19.2796	18.9281	21.1344	20.8512	20.6089	21.9491	21.8602	22.2746	21.2611	22.9428	23.2223	24.0625	21.9787	24.4297	24.6059	24.1346	25.6721	26.903	26.8751	26.1117	26.9757	27.9632	28.4203	28.225	29.0813
	21.2881	19.1528	20.8866	19.8922	20.1803	20.9714	20.0058	19.4994	20.2103	19.5817	20.2062	21.5937	20.8344	21.4961	20.5064	19.8001	20.6066	19.6331	20.0988	20.4776	20.4077	21.16	19.6174	20.064	19.9393	21.1982	20.3855	22.2678	21.336	21.4816	22.3906	22.0692	25.551	24.6552	26.9095	25.3553	24.7695	28.6497	26.3414	29.5426	26.7747	28.4414	28.8974	29.2255	28.4676	32.2723	29.7869	32.4876	34.7104
	19.8807	19.658	20.7436	19.5326	21.5204	21.5272	19.6113	18.9527	20.3009	19.3929	20.0403	20.3376	20.844	20.9985	20.974	19.8865	19.2874	19.2347	18.8895	19.0106	21.5109	19.6148	19.9416	19.7125	21.5079	18.7609	18.6503	21.7494	20.8543	22.2612	22.8905	22.1221	25.6078	22.3121	24.7049	23.8367	24.2534	26.6648	26.1182	28.1343	29.6153	28.357	26.4928	29.4856	26.8538	27.422	28.8976	31.8231	31.8861
	21.4508	23.25	20.7284	21.1007	21.8147	23.4433	21.1053	21.4144	23.1091	20.9296	22.2432	22.3813	20.669	21.1408	21.6511	22.199	21.767	20.2201	23.0495	20.8693	21.1148	21.681	19.9271	20.5664	20.7613	23.5394	24.6347	29.1589	28.7109	31.1974	32.1394	34.0443	36.0786	42.4428	38.7818	43.2634	46.817	50.9686	49.0088	56.7897	52.7873	57.0972	62.279	64.4126	60.6057	65.549	62.7396	63.3523	67.1124
	21.256	19.2353	20.607	21.5462	22.8289	21.9564	19.8296	21.7844	20.4202	21.6525	19.9888	21.0231	20.3824	21.0434	20.3155	20.7187	18.0836	19.247	17.8211	20.3582	19.518	20.5898	20.3113	19.1114	18.6119	21.857	24.3781	23.8423	25.9716	33.282	35.7647	35.4769	36.6028	42.0821	38.0204	38.8929	46.6445	42.731	45.2412	48.4623	52.1592	47.0943	50.9399	48.6844	53.1828	51.5872	54.2993	52.6617	53.2443
	21.5963	23.5826	20.7412	21.9523	20.0369	20.6012	22.0806	21.3489	20.7429	22.0933	21.0317	19.9596	22.2757	20.7374	20.8022	23.3567	21.3006	21.0066	23.0986	20.4371	20.8949	24.7333	25.8046	26.7647	26.2369	26.0895	27.5655	26.8223	29.3007	29.3395	32.0051	29.57	28.492	33.7398	31.2869	29.5941	33.1053	32.6919	31.7698	31.8991	34.2715	36.0018	38.4812	35.9235	38.5382	38.1271	40.4054	37.446	35.6414
	24.4008	25.4398	23.6687	24.7905	23.4362	23.3388	24.8569	23.7784	24.4631	23.6543	24.4774	25.346	24.1446	24.3791	23.6194	23.8377	23.6546	23.953	25.0421	24.1003	25.9759	25.9422	26.9262	27.2078	28.5408	28.5805	29.7029	29.7957	31.7856	32.1278	31.1932	34.2345	32.1073	34.6104	34.7112	38.3205	37.832	37.1338	38.0032	38.899	38.107	39.0157	40.6782	38.8564	42.0883	41.8352	42.3922	42.1593	44.0473
	20.5693	20.2144	20.1886	18.0968	20.4222	18.9816	19.8371	19.5143	19.8033	19.9869	20.1269	20.1947	20.6557	20.9296	19.7788	19.1363	19.7556	18.3098	20.2369	19.7947	21.6472	21.7017	21.9501	20.6085	22.6059	22.9289	24.8714	23.2088	26.5605	23.2514	24.9444	28.2939	29.4464	30.285	28.7137	30.2728	31.4435	34.9702	33.1159	35.8866	35.3818	34.3646	34.7144	36.7887	38.4917	39.7043	37.594	36.4651	40.9788
	18.1443	21.2816	19.7235	19.0496	18.1835	18.9838	20.254	17.8202	18.0418	19.31	17.786	20.0698	17.9122	17.8524	20.7872	18.2014	18.1134	19.2762	20.2422	18.4945	21.2059	21.8808	21.5793	22.8276	25.4925	24.807	26.5495	27.1887	31.2421	33.9958	34.8666	39.668	31.7669	39.6754	42.7158	36.4549	46.7276	45.313	38.8496	42.9224	45.1705	48.6117	48.2208	46.3978	52.6863	48.8998	48.0685	44.5323	48.3565
	20.5917	19.9205	18.9312	21.9732	21.1785	19.2031	21.277	20.4748	19.6392	21.5253	20.7364	20.0113	19.9845	20.6482	19.8947	20.2648	19.588	20.6126	22.7361	20.4042	25.2315	22.8688	24.6697	24.3688	24.408	25.2574	25.7468	24.5299	27.4995	26.0698	27.491	29.1869	25.2475	30.2224	30.7548	28.5943	32.6587	29.8548	30.7511	32.9448	32.1518	31.4648	31.2313	30.9951	34.6119	31.2133	32.9968	32.4428	34.8905
	24.4192	23.9039	24.0112	23.857	22.5491	21.6443	23.8032	22.0584	22.407	22.493	22.714	22.5256	22.4211	21.1726	21.7508	21.2535	20.5934	20.5439	20.8826	20.1662	23.0885	21.7823	22.725	23.5877	22.7823	23.2364	23.5521	23.9071	24.9664	24.6788	23.8596	25.348	24.6029	26.3011	24.8311	27.1362	26.2874	25.9316	25.235	25.6587	26.3988	27.046	27.2834	25.4067	26.6584	26.7938	26.1724	27.3974	26.4236
	20.6878	21.6343	20.7498	21.1885	19.5445	19.7728	20.3059	20.6437	20.3564	20.0481	20.6036	20.5832	21.5386	20.808	21.1303	20.4053	20.9408	21.3289	23.3267	21.3703	24.292	22.757	23.619	23.7033	24.6975	23.521	25.1682	25.0602	27.2814	26.6298	28.3093	29.0901	27.876	31.4379	29.8791	31.7557	32.6406	31.3359	33.88	32.7101	31.8486	34.0945	34.5453	33.0396	35.7885	36.4921	35.634	36.1051	35.9747
	22.8742	22.4056	24.6505	24.4921	23.7785	25.6357	29.2802	35.1831	33.311	32.7447	27.7904	26.0457	25.5537	22.2922	22.999	21.9893	20.7666	19.776	24.0165	21.9331	23.9615	27.4645	29.5831	28.537	33.7518	32.0567	39.5326	38.2381	43.4286	40.6446	45.3025	42.8819	41.0049	43.623	41.9984	45.1147	42.2323	41.0884	37.0883	40.6713	40.7749	38.8969	39.7916	41.9494	38.2998	39.3041	35.0957	35.8826	37.2393
	29.7174	30.8613	29.9403	31.3371	30.3622	30.4175	30.9732	33.3006	30.3231	31.2596	30.3166	29.9597	30.4773	29.6659	30.1634	29.7098	31.5959	30.3589	29.6356	31.663	30.0933	31.0017	32.0012	31.6533	27.9054	25.6998	27.413	27.6273	27.7395	29.7255	29.143	29.1498	30.8657	31.3786	30.0214	30.8471	30.1452	31.8835	32.9839	31.6938	33.593	30.0451	32.5368	31.5405	33.5678	33.2181	33.1461	33.2826	32.2349
	19.7963	19.059	19.4362	20.5166	21.5066	20.2757	20.7616	21.7347	21.0815	20.885	20.757	19.9262	20.4508	21.0294	19.742	20.3571	20.9879	20.5064	20.6381	20.1781	19.617	20.4617	20.4085	21.5814	19.8352	20.3533	20.462	20.1161	21.3352	21.8069	22.4175	21.9304	22.9018	23.4551	22.274	24.2363	23.466	23.9004	23.8217	23.5054	24.8891	24.8295	23.2417	24.9943	25.1484	24.2686	24.8577	24.2166	25.6644
	21.6068	21.1945	21.1668	22.6042	22.3449	22.2517	23.0693	23.3698	21.4972	22.8399	21.4233	20.683	21.3524	22.461	20.9417	23.0135	22.1448	20.5394	21.8469	22.4824	20.7817	22.949	21.9119	23.7234	20.9926	19.7512	23.7068	21.0611	24.3206	22.7338	24.539	26.2101	24.6899	26.9088	27.0505	27.2558	25.9584	29.2106	27.2563	27.0948	28.774	28.268	27.2111	29.0636	29.344	30.1468	29.555	29.5893	28.0978
	22.2992	22.1109	21.6607	22.6668	22.1252	23.4834	22.0177	21.6679	21.4506	22.8566	22.5079	21.3252	21.9277	21.7159	22.1704	21.8443	22.123	22.6335	22.0572	21.9218	21.752	23.3434	22.1337	22.4526	22.239	21.6058	21.7889	23.5997	23.8177	24.8376	24.7735	24.5847	25.6941	26.6312	26.0234	28.2308	27.0204	29.9224	29.5845	29.8955	29.7581	29.7349	31.1221	29.5617	31.5816	31.1552	29.8679	28.6863	30.2791
	20.829	19.8649	19.7687	21.0256	21.4264	20.8039	20.9193	21.3404	21.7489	20.9833	20.7019	21.4902	20.7638	22.1507	20.7362	21.6184	20.6761	20.9681	21.6484	21.3608	22.9151	22.5777	20.265	20.0822	22.1974	19.6564	21.5174	21.6821	23.025	22.0396	22.7716	23.8912	24.96	22.015	25.776	24.6443	24.9764	25.9001	25.3462	27.1778	24.4846	29.2204	25.5672	28.0011	27.761	25.5416	28.0632	28.7194	26.5984
	20.4685	23.2228	21.5241	21.6474	22.9692	21.3305	22.2635	23.3614	21.2086	21.8557	22.0972	20.6649	20.6147	22.2021	21.1905	21.9461	21.5198	21.0246	21.9959	22.0181	21.0939	19.9287	23.1287	22.3577	20.1855	23.1482	20.8845	23.3663	21.1007	22.9427	22.3775	26.1724	25.387	25.7609	27.3968	26.1814	24.6175	26.2144	28.9571	30.5033	28.3998	27.083	32.6105	24.4879	29.2334	28.939	27.2206	27.1012	33.0578
	21.0866	21.3014	20.5268	21.1437	20.7281	22.5429	20.8266	20.9612	20.8814	22.7959	22.2764	19.9055	21.7449	20.8568	21.0433	21.0441	22.0851	19.6171	22.0345	20.679	19.6806	22.9513	21.22	22.158	19.5133	20.0324	20.603	21.8119	22.5669	25.2986	25.6526	25.4248	28.2329	26.9449	27.4511	30.4452	27.5237	30.6257	33.677	34.1353	35.9993	33.4231	33.2142	35.6154	39.9458	36.5777	37.612	36.0297	34.31
	25.5245	24.7108	24.6829	25.0518	24.7221	25.7912	24.8815	25.2118	25.4166	25.3528	25.2723	24.1847	25.2974	25.4171	25.3149	25.147	25.7086	25.0122	25.2572	24.3148	24.9335	25.8711	25.5913	26.0194	23.9232	21.7511	23.1305	23.9575	24.0747	25.387	25.4895	25.493	26.0455	27.2113	26.6511	27.4981	27.8203	28.2293	29.2783	29.4067	30.3363	28.8557	29.8991	31.1824	31.9066	32.0041	32.4633	31.3964	32.2265
	24.3059	24.5478	24.5125	24.1593	25.9217	25.1064	23.9749	25.1728	25.8957	24.1325	25.4922	23.4045	24.6709	24.428	24.0362	24.6951	24.0691	24.3453	24.7764	23.761	23.9223	25.5366	25.5278	24.0179	23.8908	22.5705	22.7473	24.7178	22.6266	25.194	25.3098	26.5372	27.6168	26.6054	26.5215	27.1459	28.5943	27.4572	31.1008	29.668	31.0199	28.8941	30.361	30.2745	32.1046	32.7045	31.9428	32.7742	34.192
	24.5266	24.9015	25.8072	25.0116	24.3855	24.7685	23.3555	24.6687	25.8189	24.0925	23.5433	23.4541	24.3838	24.3738	24.7449	24.3778	24.5378	23.8579	23.8982	24.9672	24.0665	25.1085	25.1567	24.8418	22.4852	22.74	23.3954	24.2839	24.5366	24.6702	24.5376	27.0252	26.5638	26.3092	27.1549	28.405	27.7693	31.6742	29.3985	29.7521	30.4513	30.7775	30.8847	30.0963	32.6733	33.9549	34.4003	34.9447	30.7459
IP3R1 shRNA+IP3R3	20.2816	18.7636	18.532	20.4169	18.6034	18.6723	20.8487	18.6816	19.9652	19.398	19.2426	20.0385	21.6134	19.0671	17.8667	17.1166	18.0613	18.7763	18.8054	18.4577	20.6236	19.642	19.739	19.2334	17.5659	18.7355	19.7827	22.2637	20.8679	21.1463	23.0344	19.0324	21.9194	21.0831	22.3032	24.9325	22.4994	23.5856	24.2603	26.1905	27.0688	25.577	27.3902	26.0027	26.4907	29.4732	31.6958	28.2758	26.8045
	21.0849	20.3111	22.4488	21.8737	21.8007	22.6771	22.7518	21.6184	22.4125	21.9965	21.2209	21.1954	22.2218	21.4943	22.0697	22.5344	20.992	21.5506	22.2693	20.6124	21.6897	22.3559	22.2825	21.7518	22.1291	21.36	23.0271	21.8454	21.9974	22.7493	23.5645	24.1807	26.2199	24.8568	25.7621	27.494	27.5642	26.7362	29.5558	29.3932	28.2235	29.6421	31.3333	30.6241	33.1573	31.894	33.5699	32.4773	35.6708
	18.7876	16.945	18.8326	19.634	17.8205	19.5996	17.6247	18.739	19.243	18.8779	18.5373	18.6832	18.7297	19.3071	20.2321	17.565	19.3769	18.9634	19.3141	17.793	18.3259	19.2296	19.0876	18.8512	20.1507	19.4097	18.9373	18.5426	20.2411	20.4824	20.881	21.6467	22.9984	23.2561	24.4763	24.0587	24.2543	25.469	25.1085	26.0325	24.855	28.0526	27.6903	28.3547	25.2811	27.351	29.6637	29.2032	29.9034
	16.5658	15.0475	14.2595	15.1374	14.8579	16.5547	15.0386	15.0241	14.8969	15.0218	15.0622	15.5026	14.8678	16.1161	15.7601	16.3547	14.8131	14.5846	16.2746	14.99	14.9672	15.9307	16.2879	15.7086	15.7714	15.6207	15.9823	16.057	16.5782	17.487	18.5887	20.517	21.4365	22.5556	22.6212	26.9264	27.0486	24.3877	30.8963	28.1955	32.5145	31.7113	30.2091	31.5321	36.2061	39.5831	35.3741	36.6047	37.8065
	19.9528	17.3734	19.9534	21.0559	18.4225	20.6134	20.3222	18.7062	19.0362	19.0408	19.6042	18.5009	19.9387	19.1054	19.068	19.5431	20.4389	22.3796	19.8293	19.258	19.3392	18.9151	18.9818	19.1085	19.4425	19.4064	19.8601	20.9513	19.8605	20.4449	21.94	21.0512	26.4027	23.8719	21.9448	25.7916	25.2031	26.923	26.0164	31.3147	26.7535	31.5542	34.6302	32.0014	33.3304	29.9582	35.2248	37.134	34.2661
	22.8585	21.2149	19.7801	19.8563	20.6614	21.3306	22.2421	20.7414	20.7876	21.6328	23.0006	20.9589	23.5892	20.9752	21.8275	21.3836	22.0196	20.6083	21.1367	23.6027	22.2824	21.6616	21.4714	22.0074	21.2774	19.8583	20.7822	24.2173	21.9334	24.7712	22.0556	26.3535	27.3472	26.5546	25.7488	31.0619	29.8515	27.9739	33.9969	33.4533	33.3285	32.43	39.4789	37.271	36.984	35.7967	37.2674	45.968	42.4918
	19.6377	20.9535	19.7316	20.2858	20.2927	20.3557	19.1637	20.0982	21.4198	19.6339	19.4109	20.0253	19.5315	20.7041	20.1064	20.3637	19.8398	20.5665	20.1816	19.885	20.4159	20.3186	19.0852	18.9209	19.2137	19.7051	19.5334	20.8462	18.6015	19.4023	19.2683	19.123	19.0927	18.933	20.2802	19.3902	19.0786	20.9075	19.6134	20.1538	20.3785	20.4962	21.2824	20.9871	22.0594	21.676	22.6454	22.1911	22.8913
	22.5351	23.4634	23.9252	24.1624	23.1738	23.7106	23.0228	23.9303	24.4696	24.1953	23.6202	24.8712	22.2196	23.9286	23.9377	24.6625	23.9064	23.7974	24.7138	23.726	23.5649	24.2831	23.3939	23.9884	23.3539	22.11	22.8252	22.9212	22.8593	23.3988	23.5461	23.1029	22.6235	22.5539	24.2289	23.7446	23.4146	24.3083	23.4152	23.4968	24.0178	23.8998	24.3326	24.3054	24.4345	25.2118	25.594	26.1719	25.3803
	18.7562	20.2438	18.4851	19.044	19.4765	18.5712	17.9797	17.2828	19.6179	18.5306	20.5612	21.1725	20.2319	19.5852	18.817	20.9284	18.69	19.6513	21.1795	20.257	20.1853	20.0185	22.05	18.5726	20.4389	18.8525	20.0215	20.9178	18.8107	18.9356	19.6983	20.0139	18.9879	18.6994	20.6555	20.5126	19.7671	21.469	19.2757	19.6015	20.6667	22.296	20.1348	19.4681	21.2559	20.3788	20.7963	22.948	21.0913
	21.8915	22.1545	20.2481	20.2158	20.1684	23.0695	20.7952	20.112	20.7556	21.5945	21.3771	21.577	21.3429	19.8097	20.5203	20.6426	21.1141	20.2449	21.5825	22.606	21.5695	21.0722	21.1734	20.4145	20.6221	19.4449	19.6769	19.5209	21.3942	21.276	19.1105	21.5469	19.3376	20.9204	20.9597	21.483	20.2948	22.5132	20.0411	21.1176	23.7863	21.894	21.8884	21.4663	22.264	22.767	22.0385	21.9025	25.4518
	20.6685	23.4591	23.3308	22.3502	23.2962	23.9541	22.5996	23.6205	25.4405	22.0847	22.9605	21.7945	21.9946	21.9686	22.2866	20.5424	22.1918	23.8471	23.4413	22.1849	23.4509	20.9404	21.4909	22.0691	22.8174	22.37	19.737	21.9476	21.6394	20.8437	20.943	21.4212	22.2991	21.5543	22.6283	22.8114	24.8497	23.0377	21.9609	22.3626	24.3766	24.8913	23.7693	22.9757	25.9558	24.6491	24.2341	26.6987	29.963
	21.4002	22.1181	21.0552	22.1824	22.2489	21.1573	21.8629	20.5482	23.0973	22.09	22.1765	22.6803	20.7065	21.4936	23.844	21.6926	22.4895	22.0327	22.0919	21.6288	21.8715	22.6329	23.4882	22.8738	22.4515	22.6038	22.2674	23.5803	22.479	21.6678	22.97	22.6963	22.6585	21.786	22.5156	23.5716	21.7121	22.9242	22.9358	22.9484	23.392	25.1651	24.438	25.2777	25.4428	25.3728	27.6748	27.051	26.8575
	20.4492	20.8223	22.2711	21.6336	21.1809	21.3747	19.6433	20.0503	21.1175	21.1661	21.8519	21.7753	19.8724	19.6384	21.5052	20.786	19.9328	20.9405	21.8211	21.304	20.7536	22.0768	20.4226	19.3555	21.0254	21.2907	21.4046	20.815	20.921	20.273	20.4718	21.937	20.5471	19.8233	20.3146	21.9243	21.0746	22.7943	21.7014	22.6751	23.5051	22.4863	21.3327	24.8323	21.3169	23.2696	21.4557	25.6286	24.6665
	19.8905	19.7146	20.2554	20.5842	20.1888	20.0941	19.4208	19.521	19.5682	20.3069	20.5693	19.7326	19.6993	19.8113	20.1407	20.288	19.653	20.0165	19.9148	19.6405	19.6976	19.6814	19.1213	19.2473	20.1323	20.5158	19.7239	19.6382	19.3912	19.4564	19.8198	19.1164	19.1723	19.2481	19.561	20.3533	19.4541	20.4208	20.2059	19.7601	20.2415	20.7877	20.7067	20.1623	21.0081	20.6187	20.8179	21.1738	20.5077
	18.8956	19.4288	17.7688	19.4809	19.8893	18.7353	18.2386	18.0115	18.9065	18.7959	17.9131	18.985	18.0844	20.7906	18.5857	19.6757	19.9122	18.8292	18.8651	19.5264	18.9144	19.1127	19.8168	18.5546	19.1429	20.4072	18.5017	18.1083	18.3239	18.431	17.6157	17.6123	19.8647	17.748	21.127	19.5667	19.819	18.7922	19.5582	18.4127	21.2444	20.3541	19.6144	21.5393	18.489	20.5548	20.5002	23.2685	24.3119
	24.4774	23.4812	24.0443	28.0231	25.6704	23.4117	23.1251	24.6688	25.5104	24.658	23.0582	24.3629	24.3578	22.8244	22.8934	24.9362	24.2217	25.8744	23.67	23.7041	24.1917	23.1763	24.5815	22.4864	24.0175	24.071	23.8551	23.3024	23.904	22.8746	22.8159	22.6774	24.0266	23.6421	22.6415	23.0962	23.8032	23.4841	23.5896	23.7626	24.497	24.4802	25.7122	23.9892	23.4049	24.4108	21.7445	24.9813	25.5495
	19.5	18.4468	19.9214	19.5879	20.7737	20.0979	20.7439	19.3892	18.777	19.8514	21.0686	19.3963	19.4337	19.7744	19.0746	19.8745	18.4293	19.3068	19.3802	18.9865	19.3081	20.0091	19.7571	18.2405	19.731	18.4196	18.9566	19.5819	18.3393	18.6522	18.4538	18.5527	18.9169	18.5564	17.3615	19.5081	18.1013	21.0885	18.1827	18.761	19.4361	19.8288	20.1034	19.6577	20.9017	19.5523	21.0347	20.9891	22.6259
	18.0806	21.0072	19.9616	20.5575	19.6838	19.6169	18.4816	18.9946	19.1316	19.0005	19.582	20.5248	18.8675	19.6096	18.4782	18.5657	19.9965	18.5196	18.2058	19.9525	18.385	19.2494	20.1607	17.818	19.485	19.0746	17.9384	19.1174	18.0959	19.4374	18.9124	19.5404	18.2806	18.4445	18.9902	20.1105	19.5957	19.4068	18.5711	18.8179	17.649	17.7532	18.9021	19.4919	19.2574	19.7341	19.134	20.9176	18.9108
	25.9437	26.0184	26.2622	24.1097	26.0953	24.0885	26.0247	26.4007	22.5167	23.7908	24.8631	24.4274	25.1707	26.3929	26.3361	25.4593	25.243	24.7027	24.2615	25.8919	23.3553	28.2198	24.5558	25.1193	26.789	27.1773	24.8769	26.6342	24.6893	23.7178	24.0527	22.8626	23.7664	25.4513	21.4617	24.4863	26.0501	25.121	26.3148	25.1592	28.0271	23.8038	27.1523	29.5994	28.729	30.3537	29.7064	30.0339	33.4277
	23.7158	23.2717	23.5522	24.6306	23.2064	23.3991	23.7868	23.8007	22.7831	22.7786	24.2919	23.9167	23.3593	24.9806	24.7421	24.6919	24.0625	23.7854	23.3505	24.5994	23.6392	24.1378	23.8253	24.3325	23.9856	24.1114	24.1913	24.6242	24.1458	22.4906	23.9729	23.6259	23.9892	24.7636	24.2139	24.8893	25.2922	25.2014	25.3304	24.2236	24.441	23.2801	25.6549	26.5851	26.7756	26.3835	27.3231	26.2743	28.8605
	20.2804	22.8998	20.2176	21.8718	22.6567	20.8216	21.6655	21.5876	21.4529	21.0362	22.5044	19.8913	21.9714	24.4631	21.3003	22.2925	21.1642	20.41	21.1307	20.5365	21.0482	22.1428	22.582	21.8936	21.1887	21.4852	21.1894	21.3163	22.5358	22.135	20.3553	22.9176	22.0932	21.3972	20.9643	24.0193	23.2083	23.8972	25.1321	25.1689	26.0912	24.3707	27.7578	29.2552	30.0868	32.4427	28.0218	32.549	32.3414
	22.3883	22.2424	22.0686	21.8702	22.3129	21.4657	21.8737	21.3602	21.2995	21.3353	22.2392	22.1393	21.0713	21.8458	21.7225	21.0907	21.4677	21.6668	20.563	21.8561	21.8828	22.2252	22.4146	21.6627	21.0548	22.1107	21.4242	21.2731	21.5675	20.7388	21.0857	20.4059	21.677	22.2211	21.5036	23.8595	23.6581	23.7928	23.984	25.3351	25.2301	25.8088	26.2987	27.6531	27.9228	28.0224	27.5853	28.7113	31.4449
	21.0075	20.4403	20.409	20.3313	21.4917	20.0469	20.1446	20.2287	20.5242	21.1012	20.7818	20.5322	20.3784	21.271	20.8786	20.2327	20.5783	19.7337	20.7012	20.9061	20.9765	21.2669	21.1856	21.0101	20.8019	20.6836	20.5811	21.3274	20.5014	20.7983	19.5994	20.0146	21.4997	21.7035	22.3141	23.9449	23.5296	24.2517	27.0817	26.0746	27.5177	28.3401	27.7857	31.7738	32.7636	34.5127	34.0451	32.9449	37.7725
	19.87	20.1823	20.8228	20.2492	21.0144	20.2	20.6639	20.296	20.2446	19.1567	20.1474	19.8956	20.9359	20.6948	20.1813	20.4449	20.782	20.128	20.2767	20.4357	19.8046	20.0423	19.6827	19.9804	20.5204	20.5765	19.5338	20.7476	20.1004	20.379	20.3848	20.1892	20.1633	20.4089	20.1771	22.0287	21.2349	22.2613	22.8724	23.7372	23.8193	23.2869	25.0922	24.196	25.6957	26.9554	25.5671	24.9717	26.9416
	20.7275	22.2603	21.1638	21.1682	20.18	21.1568	20.5161	20.2751	21.1413	21.4983	21.2554	20.7157	20.9996	22.1648	21.3879	20.3295	20.2283	19.3545	21.0328	20.6122	20.4662	21.6681	21.7	20.8391	21.7461	20.5016	21.3613	20.3644	20.8442	19.3777	18.0406	20.3627	23.0222	21.3415	21.9044	22.5327	22.5072	22.5822	23.3926	28.8778	26.076	27.2173	29.5916	31.4444	29.11	30.5223	29.5599	31.8114	34.9418
	23.5837	23.2294	23.3215	23.417	23.3008	22.4128	21.8903	22.6289	22.0447	23.0886	23.9073	23.7409	23.2943	24.3919	23.6195	24.0668	23.151	23.0872	22.411	22.3053	22.9434	23.0884	23.8679	23.2362	23.5021	23.5848	23.2349	23.275	23.079	22.9448	22.0825	22.9417	23.488	22.0356	22.3638	23.2473	23.4388	23.7723	25.1647	24.9113	25.3755	25.5663	26.8143	27.1614	30.102	27.8303	29.6797	30.4373	31.6383
	22.0231	21.846	22.9796	23.0178	23.1402	22.0766	22.4312	23.6594	21.8172	22.8289	21.7363	23.313	22.5001	22.4356	22.5437	22.2443	23.4967	21.998	22.4438	21.4936	21.9189	23.1367	21.9894	23.6862	22.3949	23.3661	22.095	21.4942	22.5257	21.1533	21.5768	22.6318	23.5802	23.6721	23.2058	23.6819	26.4872	23.6483	24.2419	25.4525	25.4817	25.3648	27.4013	28.5982	28.9926	28.274	28.5436	27.7434	31.4958
	21.833	20.5742	20.5601	19.8443	21.313	21.4941	20.6641	21.3171	23.0528	21.0407	19.8499	21.9782	21.6443	21.9707	21.8753	21.2562	21.3973	21.0212	21.2536	20.8316	20.6509	22.2249	23.1842	22.5736	22.887	23.5596	21.3053	20.3695	21.5055	20.7577	21.3591	21.0824	22.3476	22.4306	20.537	22.688	24.2009	23.2964	23.7109	23.8709	26.1104	25.5779	25.4845	27.1626	27.2812	27.2666	27.7976	31.7277	30.8498
	25.3073	26.5017	24.9619	25.6787	26.055	26.0512	26.3576	25.2146	25.4247	25.0635	25.3294	24.4714	25.4223	25.9941	25.1436	25.1866	24.4853	26.0619	25.1804	25.8305	25.5373	24.641	25.7018	25.1876	23.9696	23.0206	23.6245	25.4957	25.4997	27.0002	25.8464	27.7109	28.2723	29.5383	29.7739	30.0962	32.0388	33.4659	34.9116	34.9873	34.2227	36.3553	40.0262	39.1059	41.2798	40.5441	40.622	41.8986	42.6895
	19.1598	20.188	19.8228	19.7147	20.2652	19.9075	21.0951	19.1649	20.9414	20.2615	20.016	19.8643	20.4309	20.5312	21.3975	19.9515	19.3859	19.3146	20.9898	20.8561	19.5913	19.2835	20.7809	19.8326	18.5518	20.0378	20.7235	21.2053	22.3154	20.871	23.4019	24.5717	22.6053	24.3421	26.2435	29.2933	35.2415	48.2666	67.1498	83.1084	112.044	118.78	114.846	111.145	92.747	92.7291	74.0826	69.7796	68.6917
	19.9324	19.3496	20.6842	20.9661	20.051	20.2566	19.2704	20.7455	20.2468	20.2573	20.5104	19.6665	20.5713	21.0857	18.8259	20.3199	20.0918	20.1947	19.4838	19.6029	20.0896	19.3199	19.7909	19.3521	19.9319	19.4108	20.7469	20.7131	20.5877	21.0104	22.002	22.0635	20.6581	22.543	23.1003	22.6371	22.8671	24.4054	25.1058	24.5185	23.9019	24.593	25.8659	25.7432	24.2284	26.7489	25.0668	27.5211	26.1778
	21.4009	22.9829	22.3186	22.5071	21.9659	22.6549	22.7393	22.2296	23.0151	22.1091	22.6604	22.2284	22.9876	22.3731	21.0974	22.2991	21.5909	23.1725	22.5632	22.79	22.9376	22.135	23.7324	22.5461	20.715	21.5179	21.6525	23.0199	24.8966	25.1084	25.066	27.6748	28.3557	28.6071	29.4745	29.7408	32.012	33.1796	35.011	32.3024	34.7144	34.4529	34.043	36.9703	34.8626	36.906	36.0021	34.3994	36.9191
	19.526	20.6308	20.381	19.7304	19.8832	20.4414	19.6815	21.3732	20.5417	20.47	20.0223	19.8381	19.4886	20.3406	18.8884	19.5045	19.5368	20.5165	21.2615	20.7023	20.5493	21.4627	20.7986	21.3317	19.4801	20.2477	20.6389	21.6038	23.3987	23.2468	24.6112	27.1783	26.8279	26.4206	26.9826	29.3112	30.3974	30.2778	32.5931	32.3876	30.5818	33.1324	33.9309	33.6769	34.1268	34.7822	35.2016	33.6856	37.1711
	20.0484	20.6587	21.6942	21.01	22.167	20.5461	20.2548	20.8811	19.6123	19.5665	20.5216	21.0053	21.2368	20.5715	19.5813	18.5194	20.3702	18.7675	20.5585	22.0425	20.7302	20.0748	21.9456	19.869	18.5462	19.8569	19.6473	20.6025	21.1754	23.8761	21.2156	25.7035	23.4701	26.606	28.3268	31.9385	30.962	29.8618	31.7741	28.2264	25.2245	31.217	27.2594	33.9595	34.7349	27.2063	35.9056	29.3803	33.4958
	18.5563	18.9908	19.688	19.4353	20.6449	19.4574	18.8306	20.072	19.5844	19.2752	19.4543	18.9828	20.4414	21.1212	20.1541	20.8801	19.9689	21.1062	19.6833	19.7315	21.1888	19.3127	19.9152	20.5283	19.3122	19.3386	20.7267	23.4576	21.3979	22.448	21.783	23.5632	25.6757	24.9745	24.4088	26.229	26.7489	26.9984	27.915	27.4616	26.0929	26.6843	30.1382	31.1653	27.9548	30.0954	29.6223	29.7824	30.1886
	25.233	26.5229	25.4137	25.0186	25.2977	25.4179	25.108	26.8614	26.3724	26.3709	26.4826	25.3641	25.9223	25.6326	26.4721	25.781	25.7498	25.8081	25.6533	26.0072	26.537	26.0079	25.6121	26.6509	26.3055	25.8688	25.8212	25.6843	26.0588	25.7788	25.7909	26.463	27.2731	28.5896	28.3871	28.9866	28.8979	30.5395	31.9187	32.046	32.2431	32.7399	34.6179	33.8362	34.7801	35.1496	36.2483	36.7454	38.3507
	20.0569	21.114	20.1142	20.627	20.0289	18.9569	20.5274	21.0985	21.0761	19.8246	20.3627	19.8956	19.2015	20.2023	19.8194	19.5787	19.2964	20.0833	19.5328	19.8555	19.8359	18.4632	20.0423	20.1199	20.6137	20.1728	20.6998	19.2204	19.8002	19.5095	21.0403	20.8184	20.6501	23.153	21.5226	22.2556	22.6401	21.1465	23.7887	22.9342	23.153	25.0115	25.9395	23.821	27.3418	25.9884	26.6204	27.4845	25.7586
	20.883	21.6915	20.7852	21.6061	21.3365	21.3255	21.3072	20.3397	21.329	21.196	21.1637	20.5568	21.17	21.4211	20.8418	21.882	20.4819	20.5619	20.9254	22.6978	22.447	21.5942	21.4068	21.4321	22.3373	20.556	21.6916	22.5042	21.2971	21.9156	22.0973	21.3058	23.3129	24.9046	23.7484	23.7574	24.356	26.1171	26.0283	27.4126	27.0307	27.24	29.703	27.9804	29.9022	27.8931	32.3806	31.548	33.6039
IP3R1 shRNA	19.1492	5.16691	5.10577	5.80994	4.98417	4.86834	5.66118	5.87414	5.77893	5.68305	6.70947	7.64181	8.36598	8.49689	8.92857	8.96282	8.55064	9.81097	9.60854	9.93048	9.54702	9.6692	9.95545	10.2242	10.2177	10.4322	9.96374	10.0244	10.2914	10.6353	11.0619	11.2715	11.8409	12.3152	12.2524	12.8601	13.0498	13.83	13.7574	13.8123	13.711	14.3188	13.9485	13.6006	14.7652	14.7755	14.1199	15.2624	14.9946
	29.5558	15.1022	15.0984	16.0117	15.3615	15.133	15.8503	15.9696	16.0483	15.8628	16.8253	17.7886	19.0477	19.2759	19.5342	19.2075	19.4223	20.6017	19.6878	20.3504	20.2729	20.3347	20.6237	20.1605	20.8125	21.2198	20.4896	20.4039	21.0853	21.4235	21.5596	21.8968	22.2157	23.0168	23.2509	23.2623	23.5864	23.9713	23.7163	24.111	24.6138	24.1575	24.4075	24.2012	25.4013	25.296	24.8918	25.9196	25.7757
	17.5644	4.54461	4.56915	5.01619	4.15153	4.59711	5.25501	5.089	5.07451	4.91885	6.03322	6.78304	7.87366	7.96705	8.80723	8.59906	8.44581	8.96439	8.91677	8.9869	9.21493	9.50069	9.19737	9.4613	9.74303	10.3762	9.39365	9.44499	9.69847	10.3631	10.2251	11.0117	11.5101	12.1064	11.888	12.4407	12.9358	13.0692	13.2528	13.5771	13.3599	13.1626	13.4309	13.4313	14.3198	14.8436	14.1605	14.8224	14.5362
	28.1946	14.4526	14.1701	14.8781	14.1782	13.9259	14.3345	15.1131	14.4775	14.5137	15.2853	16.2489	17.3568	17.085	17.6258	17.4624	17.4007	18.4113	18.1725	18.3916	17.8881	18.2412	17.72	17.8551	17.9831	18.7748	17.8399	18.7752	18.8136	19.25	19.7606	20.0429	20.6652	21.3985	21.0309	20.9872	21.7339	21.4796	21.8681	21.7881	21.4575	21.8939	22.0488	21.8515	22.8528	22.5595	22.337	23.4886	23.0398
	24.9857	10.636	11.2174	11.5224	10.7371	10.5951	11.8426	11.5025	11.5092	11.5749	12.7979	13.5487	14.5015	14.4336	14.8166	14.5564	15.8109	15.4307	15.5946	16.5266	15.9825	15.7837	16.001	15.9108	16.047	16.3246	15.5139	15.9437	16.7985	17.0545	17.2961	17.555	17.8282	18.7143	19.3222	19.4625	19.6664	20.1658	19.9316	20.2415	20.3775	20.3007	20.4747	19.8884	21.4826	21.0419	21.1181	21.7583	21.4325
	17.0692	2.54837	2.60522	3.24841	2.69693	2.62752	3.13689	3.28516	3.08233	2.89673	3.63783	4.65864	5.7471	5.6315	6.21628	6.12201	5.82485	6.23433	6.16813	6.61367	6.52977	6.60563	6.85748	6.77583	6.91252	7.4007	6.28253	7.00973	7.41428	7.61539	7.86525	8.11724	8.55297	9.06271	9.27194	9.64914	10.087	10.0376	10.3293	10.5535	10.8045	10.6691	10.6008	10.7898	11.7545	11.9241	10.7872	11.8606	11.8522
	35.2841	20.7076	20.4651	20.808	20.3804	20.048	20.1914	20.6183	20.9287	20.242	20.8517	21.8	22.8655	23.3858	23.7865	23.9214	23.6848	24.483	23.95	24.3275	24.0241	24.4818	24.3823	24.4605	24.4117	25.9163	24.3954	25.6579	25.173	25.6758	25.934	26.2947	27.704	27.483	27.1439	27.5954	27.5544	27.7004	27.5791	28.1684	28.8932	28.2817	28.145	28.5911	29.4149	29.1974	28.5457	29.3874	29.6279
	24.9247	10.0966	10.555	11.019	10.6303	10.6025	11.3349	11.3142	11.1676	11.0199	12.5016	12.8917	14.2357	13.9503	14.8387	15.0351	14.5116	15.0199	15.5972	15.2017	15.4484	15.5234	15.677	15.5982	15.9408	17.5449	15.9257	16.4045	16.6298	17.3885	17.2211	18.0319	18.5735	19.6109	19.3945	19.4851	20.4802	20.0967	20.4307	20.9179	20.6987	20.4232	20.7983	20.7611	21.5481	21.6807	21.6165	21.7296	21.5929
	34.5022	19.314	19.0538	20.1349	18.7048	18.6474	18.6183	19.0084	19.3207	19.2488	20.012	21.3118	22.191	21.7397	22.455	22.1033	22.7533	22.5791	22.2388	22.4092	22.9086	22.5777	22.9018	22.9124	22.4893	24.3188	23.0031	23.7615	23.2007	24.7086	24.5411	25.4906	26.0025	26.8045	26.3483	26.8013	26.7023	27.6708	27.7648	27.7012	27.9801	27.8147	28.1477	28.1009	28.9281	28.4838	28.3776	29.2944	28.5808
	36.139	21.8154	20.8244	22.2728	21.468	21.3946	21.8751	22.0914	21.9874	21.4898	22.0306	23.7194	24.9986	25.1475	25.6074	25.7005	25.4741	26.707	25.8784	26.5776	26.4038	26.6612	26.6149	26.7732	27.6091	28.1483	27.5177	28.3016	28.6603	28.2895	29.9622	29.7486	30.2968	30.7932	30.1181	30.0149	30.7942	31.5274	33.1007	32.4759	32.8334	32.8914	33.2751	32.4228	33.2562	34.5072	33.0469	34.3982	33.5141
	23.8261	10.5892	10.8787	11.4996	10.8377	10.9135	11.6967	11.6686	11.7162	11.9046	12.4088	13.4596	14.8479	14.4493	15.2093	15.2535	15.1695	16.23	15.4636	16.0656	16.4915	16.0988	16.3767	16.0732	16.4019	17.4529	16.3854	16.9374	17.3799	17.5346	17.7227	18.6004	18.3787	19.337	19.5316	19.5617	20.0527	20.3895	20.5626	21.0022	21.5921	20.9754	21.2039	21.1624	22.2845	22.3308	21.8401	22.6893	22.458
	31.416	17.1254	17.198	17.8394	17.2832	17.4974	18.1241	18.2698	18.3394	17.7852	19.193	20.5191	21.0696	21.2158	21.4723	22.062	21.5925	22.1632	21.7402	21.7878	21.8639	22.3095	22.1155	22.5759	22.8606	24.0316	22.742	23.1114	23.5515	23.4349	24.3802	25.3627	25.489	26.5429	26.1434	26.3386	27.0291	26.9645	26.5637	27.3686	27.426	27.2134	27.818	27.0806	28.0968	28.1475	28.29	29.3026	28.6514
	65.2315	49.796	49.172	49.6015	49.1258	48.9819	49.8986	49.9081	49.5095	49.2786	50.7907	52.2398	52.942	52.6166	53.5325	53.3858	53.7672	54.2885	54.0616	54.8859	54.0069	54.398	54.2897	54.8591	55.2945	56.3133	54.8901	55.5752	56.4803	56.7932	57.4589	57.559	57.5761	59.179	59.126	59.0502	59.1191	60.096	60.58	60.3795	60.0354	61.0379	61.2021	60.2227	61.4382	61.8435	61.553	61.5084	61.6492
	26.0245	23.0124	21.034	21.0887	20.0614	19.5647	20.8602	20.2307	20.0988	20.9026	20.5422	20.4087	21.5345	20.9893	21.2247	21.561	21.5727	21.382	20.7489	20.3951	20.9067	20.5783	22.1525	22.0551	21.9557	22.6701	21.8475	24.3155	23.8157	25.3897	26.1794	27.261	28.7276	30.3807	31.3491	32.7863	33.6642	35.1042	36.7274	37.6407	38.4139	39.7603	41.6311	42.9632	44.7594	45.244	46.2381	48.7821	48.4904
	13.231	9.9046	8.29532	8.78631	7.41008	8.01151	9.16518	8.18486	8.2602	8.56731	8.38548	8.33232	9.82456	8.67263	8.97024	8.44385	9.11967	8.92474	8.60211	8.37877	8.7719	8.19707	9.5816	9.31357	9.39642	9.57334	8.47891	12.341	11.115	12.0818	12.8605	13.7044	14.4209	15.526	15.9565	17.1474	17.6926	19.2883	19.9831	20.0622	20.4307	21.5433	22.335	23.2079	24.3624	25.0312	24.5651	26.9908	27.1734
	27.2864	24.0494	22.1086	22.7565	21.2623	21.5971	22.8102	22.4083	22.2494	22.759	22.1913	23.2986	23.2207	22.9431	23.0319	24.0197	23.3143	23.0605	22.2731	22.8235	22.6708	22.5321	23.6167	24.189	24.1509	24.3175	23.4571	25.9222	26.4013	27.1414	28.1585	30.8901	32.0844	33.3318	34.4852	35.6329	36.4984	37.8854	38.2793	39.6069	40.3612	41.8567	42.7914	44.1306	45.7221	46.0546	46.6612	48.9238	49.6259
	66.8239	63.2353	60.7585	61.4935	58.9104	59.215	60.0141	59.5644	58.8551	60.1947	59.3419	60.0173	60.9406	60.6527	60.4455	60.8626	60.6618	60.3098	60.4339	59.3229	60.6446	59.6191	61.473	61.6142	61.5315	61.552	60.0877	63.2628	62.9646	63.8034	65.1241	66.3608	67.4507	69.4809	70.1355	72.0717	72.8977	74.4573	75.8993	76.5474	77.9269	79.29	81.0226	82.0111	84.5109	84.0929	85.1495	87.5196	88.3347
	62.4221	57.9919	56.4146	55.3402	54.4934	54.0549	54.4102	53.932	54.0379	54.4337	54.4506	54.8468	55.5577	54.0637	54.7998	55.3829	54.8831	53.8654	54.0823	53.5901	53.9838	53.7592	55.0335	55.2016	55.3728	55.643	55.9602	58.9236	58.6516	60.7541	62.9339	64.745	66.5748	69.8904	71.0719	72.7478	75.1623	75.7291	77.514	78.8451	78.9391	81.2097	82.0066	83.7945	86.8462	85.6997	86.7151	88.5813	89.4685
	64.8447	62.4628	60.8086	60.8266	58.4176	58.4655	60.1287	58.8612	59.4811	59.3483	60.131	59.3774	61.159	60.2876	60.8884	61.2461	60.4801	60.72	60.1769	59.8766	60.3	60.0082	60.7643	60.8729	61.1626	61.7044	60.3624	63.9447	64.2217	65.6052	67.2182	70.1329	72.1109	75.2467	78.1967	79.8536	82.3957	84.22	86.4355	88.356	89.9282	91.8802	94.0425	95.0546	96.6273	97.8825	99.1504	101.632	101.299
	54.7027	51.7673	50.2849	49.9615	47.4043	47.8756	48.5707	48.3404	47.3521	48.3091	48.943	49.057	48.8255	48.8672	48.8566	49.1717	48.8573	47.8267	47.9692	48.233	47.9508	47.9807	49.2573	49.0794	49.0438	48.151	47.8203	50.715	49.7069	50.9326	51.8315	53.2308	53.9153	56.2597	57.6426	58.3515	59.9672	61.1184	62.226	63.3174	64.3983	65.4872	67.1609	68.7735	69.7819	69.5581	71.6714	72.8063	72.9016
	71.8762	68.6992	66.8499	66.438	64.2971	64.8511	65.5666	64.7634	64.2034	65.422	65.5871	65.0283	66.1001	65.597	66.0455	65.8934	66.1039	65.2984	64.1429	64.5783	65.2846	64.9724	67.0207	66.9827	65.649	67.4583	65.9721	67.9522	67.9187	69.2691	70.151	72.4607	73.5842	75.8309	75.9359	77.7181	79.619	80.8517	82.1349	83.2803	84.1258	84.7337	85.9637	86.9042	89.6486	88.7693	89.7645	91.4734	91.9397
	38.3815	36.0094	34.7324	33.9294	32.0598	32.1045	32.4218	31.9219	32.4275	33.107	32.6855	33.1205	33.3553	33.6398	33.4897	34.062	33.8121	33.0032	33.3067	32.9174	33.9209	33.2758	34.909	34.5243	34.9373	35.8708	35.7327	39.279	38.3385	38.4829	40.5592	42.6606	44.0466	46.2358	47.2487	48.625	50.3719	52.3362	53.7695	54.5592	55.3673	55.5577	57.9468	58.7217	61.0507	60.9204	62.0727	63.2428	63.3785
	54.4004	52.1593	50.745	49.0004	46.7471	47.054	47.561	47.0399	46.6071	47.4602	47.5872	47.6765	48.7645	48.6009	47.8954	48.7888	48.3771	48.6349	47.6893	47.2497	47.4166	47.0251	49.5162	48.7035	48.0021	48.626	47.6464	51.6517	51.8664	52.7309	54.1117	56.5165	57.8839	61.2691	63.3666	65.326	68.2642	70.185	72.4501	74.7748	77.006	79.4772	81.3953	84.4665	86.6481	88.4301	89.5087	92.5575	92.6775
	27.1517	24.5423	22.6018	22.6943	20.9339	20.7845	21.367	21.348	21.0334	21.8852	21.8155	21.82	22.0903	22.6066	21.5466	22.3922	22.6584	21.6825	21.855	21.8083	22.0227	22.0955	23.266	23.5013	23.5758	23.9436	23.9612	25.6566	25.9427	26.8765	28.0525	29.4964	30.6198	32.6956	34.1889	35.5727	37.3922	38.9032	40.1569	42.2486	43.8496	46.2626	47.7858	49.3178	51.608	53.0072	54.5454	57.0035	57.2946
	34.7418	31.6124	29.7935	29.8929	28.1852	27.9181	29.2131	28.8228	28.2675	29.6578	29.1247	29.1506	30.0317	30.5466	30.1734	30.8901	30.1325	30.3281	29.3379	29.8169	30.2357	29.3205	30.8117	31.141	31.508	32.0999	31.7236	34.3958	34.1177	34.9574	35.8186	38.3873	39.227	41.5761	42.0227	43.3823	44.5657	45.9321	47.3997	48.3094	49.5374	50.5547	51.7832	53.3942	55.3957	56.1204	56.5176	58.5973	59.456
	17.9208	15.1867	13.8344	13.2105	12.112	11.4249	12.8598	12.1435	12.2572	13.3731	12.5093	12.4101	13.5918	12.7007	13.1048	13.6585	13.8214	12.1597	13.253	13.4746	13.0377	12.5638	14.2909	14.1093	14.211	14.5597	13.931	16.1889	16.0534	16.3034	17.8741	19.1408	19.942	21.7385	22.7787	24.5726	25.8221	26.2291	27.2362	29.0033	29.662	31.2462	32.4069	33.286	34.8099	35.6081	36.4115	38.0313	38.5727
	24.218	21.097	19.5847	19.6773	17.7927	17.8996	18.3309	17.8951	17.7581	19.0397	18.7915	18.7091	18.9816	18.8938	19.1673	19.5354	19.4938	19.3571	18.4323	18.7829	19.045	18.5262	19.4916	20.4451	20.0893	21.2498	20.4203	23.6379	23.3567	24.4102	25.3557	27.2586	28.1477	30.1603	30.8648	33.0143	33.4636	34.5222	35.5901	36.5776	37.581	38.7224	39.8971	41.1138	43.2218	43.6449	43.7702	45.953	46.402
	26.0649	23.3557	22.204	22.1553	19.9263	20.4209	20.5906	20.215	20.1002	20.8332	21.5243	21.2476	21.9194	21.6193	21.6191	21.6707	21.9407	21.4283	21.1752	21.2478	21.3714	21.6091	22.505	22.1802	22.7865	23.4094	22.6512	24.6176	24.2278	24.8793	25.6748	27.6898	27.9499	29.6554	30.1545	31.11	31.643	32.4738	33.2851	33.5815	34.0421	35.1121	36.3848	37.5698	38.4121	39.1533	39.6132	41.1396	41.513
	34.5098	31.9503	30.3083	29.9316	27.9862	27.7654	28.6544	28.4639	27.7745	28.9581	28.6568	28.9245	30.0438	29.4001	29.5794	29.8385	29.7511	28.9408	29.1415	29.1526	29.6333	29.1313	30.7253	30.6913	30.8839	30.894	30.3231	32.225	32.6705	33.5327	34.2493	35.332	36.5501	38.2466	39.1857	40.806	41.3732	42.1559	43.1161	43.9878	45.2358	45.7851	47.6761	48.6825	50.7351	50.2242	51.5403	53.6515	53.6551
	56.2517	53.5241	51.3284	51.3953	48.4359	48.0854	50.2819	48.8428	49.3992	49.1917	49.5618	49.1971	50.6062	49.7907	50.3261	50.9831	50.0767	49.3986	48.9628	49.3835	49.7955	48.7093	50.4281	51.0616	50.5932	49.8248	48.865	51.1912	51.6035	52.3895	52.8428	54.7186	55.3634	56.9252	57.974	59.0812	59.9512	61.5041	62.5091	63.256	64.1464	65.5484	67.0443	67.5034	70.2321	69.7605	71.43	73.2793	73.1377
	47.8554	45.4377	43.7856	43.8429	41.3596	41.2593	42.0171	42.1341	41.8628	42.7839	42.8845	42.8553	43.3388	43.0021	43.077	43.9747	43.7414	43.0259	42.9743	43.4253	43.2981	42.8242	44.3693	44.8803	44.4478	44.8791	43.6166	46.6964	46.5067	47.8965	48.9697	50.5604	52.0329	54.6698	55.4284	56.5578	58.1924	58.8491	61.3458	63.5891	64.0655	65.9691	68.3188	70.0079	72.9874	73.0041	74.0393	77.0267	78.4542
	40.5796	37.5027	35.6168	35.3428	33.7913	34.6777	34.9601	34.1305	34.195	35.1475	34.5708	35.3179	36.0787	35.8228	34.9535	36.4435	36.5022	36.1564	35.7055	35.2287	35.3918	35.206	36.0648	35.9501	36.4452	38.4937	37.7062	42.3801	41.4375	43.6335	45.0482	46.1031	47.5813	49.4579	51.0429	53.421	54.6077	55.4676	56.5593	57.7814	59.6459	60.983	62.0545	63.9057	65.3885	65.6582	66.8911	68.9725	69.5076
	29.1124	26.3802	24.6392	25.1678	23.7399	23.4271	24.4507	24.0899	24.8278	25.0905	25.4032	24.5247	24.4272	24.8269	26	25.5037	25.813	24.9852	23.8965	24.8896	25.8613	24.7699	26.2845	26.4395	26.7656	26.8451	25.8478	29.5357	28.7734	30.8407	32.7441	34.8436	36.7841	39.1785	41.22	43.2558	45.28	47.3377	49.3976	50.0384	52.6515	54.0309	54.9987	57.2519	60.2346	58.7514	60.688	63.1037	64.1908
	16.5491	3.8362	7.19278	8.06235	7.80548	7.81782	7.38213	6.67177	6.96357	5.84425	6.60726	5.93866	6.39482	5.43985	6.05289	5.02399	5.07556	4.92414	4.8386	5.16065	4.50941	4.83009	4.76371	4.87868	4.83573	7.41515	9.13415	11.1053	12.6809	14.1939	16.847	18.9526	18.8692	23.6008	26.477	28.3965	31.4265	33.429	35.5305	38.8996	40.5183	42.9541	45.2082	47.3596	50.1043	51.1384	52.1097	54.0805	54.9911
	14.3296	1.39234	4.99251	5.44383	5.58618	5.12412	5.09052	4.57988	4.71829	3.7829	4.71985	4.05297	3.97469	3.68658	4.05808	3.12726	3.2247	2.98317	3.63829	3.5464	3.14494	3.36703	3.55474	3.44837	2.92064	5.67648	6.56584	7.76459	9.69395	10.398	12.4132	14.2298	18.139	17.7537	19.9092	21.3151	23.5047	25.6063	27.1095	29.7	30.6705	32.949	34.8367	36.3131	38.7452	40.1272	41.6594	43.3748	44.8375
	19.3477	6.3858	9.72564	10.4598	10.0732	10.3445	10.0129	9.63477	9.43973	8.92995	9.45205	8.47625	8.7521	8.59524	9.19681	8.02012	8.16575	7.54565	8.08238	7.87723	7.54182	8.18479	8.17029	7.55437	7.32599	10.4305	12.1318	13.8242	15.8931	17.2928	20.1593	22.1628	19.707	26.7201	29.5064	31.5074	34.4152	36.5802	38.8876	41.7536	43.7059	46.4813	48.3898	50.8852	53.6216	55.8137	57.4251	59.2668	61.0171
	14.2426	1.21376	4.84513	5.15223	5.14819	4.59638	3.89923	4.22426	4.17868	3.58735	4.2508	3.41253	3.66166	3.08646	3.04047	2.42204	2.44315	2.2964	2.45793	2.66683	1.92271	2.39292	2.2803	2.02931	1.69521	3.58847	4.71232	5.91164	6.87924	7.38942	9.17965	10.4208	11.032	13.0153	14.6119	16.1979	18.1882	19.3421	20.9921	22.2294	23.7476	25.7594	26.8291	28.6367	30.9334	32.7446	32.9926	34.5918	36.1521
	16.5741	3.69289	7.37937	8.1305	7.69148	7.38029	6.98132	7.31209	6.94802	6.18708	7.02543	5.75314	5.95325	5.83954	5.76619	5.35925	5.15024	4.953	5.28189	4.92467	4.59282	4.94453	5.16271	4.94068	4.9098	5.88967	7.46433	8.41374	11.6844	11.8024	14.7416	15.2803	15.5129	20.2071	22.7868	24.0098	26.3358	29.1046	30.8021	33.949	35.4283	38.1297	40.3577	42.9873	45.4974	47.7023	49.6408	51.8913	54.6175
	16.5741	3.69289	7.37937	8.1305	7.69148	7.38029	6.98132	7.31209	6.94802	6.18708	7.02543	5.75314	5.95325	5.83954	5.76619	5.35925	5.15024	4.953	5.28189	4.92467	4.59282	4.94453	5.16271	4.94068	4.9098	5.88967	7.46433	8.41374	11.6844	11.8024	14.7416	15.2803	15.5129	20.2071	22.7868	24.0098	26.3358	29.1046	30.8021	33.949	35.4283	38.1297	40.3577	42.9873	45.4974	47.7023	49.6408	51.8913	54.6175
	16.9373	3.57075	6.9785	7.73954	7.84745	7.48338	7.05011	7.11559	6.99797	6.04737	7.06669	6.17107	6.27566	5.73127	5.75821	5.28891	5.63061	5.04093	5.328	5.25657	4.96383	5.24709	5.50268	5.31215	5.00126	8.15368	9.36984	10.7669	12.7981	14.19	17.037	18.7731	19.4326	24.0629	27.6478	30.171	33.8151	37.192	40.2898	44.3594	47.6627	52.5664	55.6906	60.0706	63.3079	67.6624	71.2739	74.3321	77.6399
	15.8808	15.3559	15.1207	15.0773	15.2012	14.946	14.9926	14.7122	14.377	14.0158	14.4336	14.0543	14.7376	14.3673	14.5143	14.6671	13.7122	13.9164	14.5827	14.7734	15.018	14.8504	14.7517	14.7545	14.6296	16.4245	16.1058	17.2636	18.0844	18.9826	19.7699	20.7936	21.9286	22.34	23.5721	24.5085	25.7235	27.2158	28.7386	29.8492	30.2934	30.978	31.3205	32.9632	33.4843	34.4064	35.398	35.9791	37.4797
	9.88684	9.56881	9.72746	9.44001	9.62655	9.46484	9.39852	9.35508	9.06292	8.89034	8.77812	8.67156	9.43621	9.2526	8.90591	9.6413	8.41196	9.04021	9.16763	9.14432	9.30378	9.12987	9.29743	9.46961	8.97212	10.3667	10.472	11.7818	12.3205	12.7588	13.508	14.5303	15.7507	16.0396	17.1074	18.2011	19.188	20.011	21.2952	22.1739	22.767	23.7257	23.8623	24.8999	25.4359	26.459	27.1474	27.8547	29.067
	9.20506	8.93122	8.36248	8.61542	9.1416	8.69715	8.69513	8.7041	8.48118	7.67766	8.43045	8.39875	8.64466	8.18987	8.59284	8.94024	8.2062	8.84243	8.94062	8.73973	8.96861	9.21735	9.16974	9.22269	8.87466	10.1186	10.4885	10.8896	11.7783	12.3885	12.8074	13.4746	14.0208	14.0146	15.2799	15.6959	16.8722	17.7959	18.577	19.4847	19.8107	20.7002	20.0943	21.2343	21.3815	22.1077	22.9096	23.6004	24.8718
	14.4695	14.6096	14.2147	14.0829	14.4238	14.0536	14.4905	13.8457	14.1488	13.5485	13.7755	13.2801	14.1868	13.8531	13.9008	14.351	13.2283	13.7371	14.1687	14.409	14.3447	14.3499	13.8588	14.4793	14.1499	15.7281	15.4964	16.5127	17.5538	18.306	18.1278	19.6878	21.0338	20.702	22.4839	23.0255	24.7636	25.9328	27.3272	28.7531	29.3219	30.2512	30.2386	31.6732	32.4567	33.3378	34.3952	35.6494	36.9307
	12.2705	12.2479	11.6963	11.9522	12.2811	11.9289	12.1313	11.5903	11.8647	11.2045	11.8933	11.6143	12.1834	12.007	12.5602	12.467	11.6196	12.212	12.814	12.8663	12.6665	12.9654	12.7746	13.0295	12.4331	14.8887	14.3561	15.438	16.0783	16.9537	17.4321	18.2347	19.6783	19.697	20.5034	21.7275	23.0109	23.7869	25.068	26.5453	26.8515	27.9193	28.185	29.9022	30.2415	31.2896	32.4947	33.4201	35.2385
	13.4849	13.4462	13.3645	13.293	13.6473	13.2884	12.9963	13.2611	13.1092	12.5517	12.9182	12.5579	13.1988	13.029	13.1456	12.9855	12.2012	12.8733	12.8608	12.8464	13.3603	12.9882	12.7812	12.7939	12.5799	14.1336	14.6561	15.6861	17.0193	17.2781	17.9389	19.0223	20.1222	20.9807	22.1003	22.8484	24.6776	25.9812	27.0917	28.2142	28.6081	30.1901	29.9524	31.3684	32.1357	32.7952	33.7992	34.4516	36.089
	8.93161	8.75491	8.53423	8.75433	9.03554	8.6628	9.00695	9.01494	8.89711	8.46003	8.3118	8.33566	8.86535	8.72871	8.29733	9.22494	8.30696	8.91018	9.04493	9.29271	9.62375	9.58557	9.36528	9.28862	9.31311	11.4293	12.0842	12.8229	13.9103	14.2616	14.9952	16.839	17.4557	17.5015	18.1929	19.3266	21.3886	21.6305	22.9383	24.1291	24.7899	25.4975	25.3322	26.4251	27.1338	27.1981	28.2158	28.7894	30.4002
	11.4959	10.7837	11.0024	10.8702	11.1193	10.5215	10.4212	10.7526	10.6008	10.0634	10.2893	9.95035	10.6944	10.06	10.2238	10.234	9.51031	9.99954	10.3934	10.3773	10.3943	9.89697	9.91984	9.95991	9.32807	11.3189	11.3738	12.3195	12.6256	13.1088	13.3419	14.5351	14.5384	14.8502	15.5373	16.3476	17.4998	18.0186	19.0247	20.0701	20.4765	20.948	20.8768	21.6397	22.5273	22.7365	23.7837	24.1769	25.583
	14.5056	14.1474	14.0856	14.0592	14.4801	14.0707	14.1643	13.8218	13.9634	13.5512	13.8008	13.6243	14.009	14.0165	14.2488	14.3252	13.6496	14.2529	14.5432	14.3641	14.4637	14.7972	14.4547	14.4726	14.165	16.4981	16.5828	17.1533	17.7757	17.9003	17.9599	18.3576	18.6255	18.261	18.8847	19.0146	20.0194	20.3143	20.9733	21.2198	20.9978	21.6875	21.1383	22.0025	21.996	22.3915	22.9636	23.6525	24.5923
	15.796	15.7466	15.5526	15.4678	16.0557	15.6472	15.6307	15.5139	15.3328	15.2023	15.1756	15.1118	15.6106	15.4026	15.5288	16.0877	14.8705	15.3667	16.1166	15.8252	15.5796	16.1526	15.9195	15.8335	15.4943	16.936	16.8965	17.7391	18.2936	18.7142	18.9835	19.5606	20.2605	19.9809	20.7162	20.8156	21.7959	22.7993	23.6126	24.368	24.6553	25.1886	25.164	26.7795	26.9186	27.9727	29.1153	30.0824	31.5027
	9.62304	9.44205	9.24299	9.18007	10.0425	9.11195	9.4959	9.20321	8.93967	8.68682	8.64029	8.56074	9.1719	8.92265	8.80233	8.93737	8.09593	8.96254	9.3366	9.04089	9.62366	9.4273	9.37378	9.51603	9.16832	10.7418	11.0111	11.8429	12.3607	12.3929	12.4701	12.9528	13.5301	13.2005	13.6264	14.0031	14.5158	14.7904	15.5196	16.0868	15.8478	16.4254	16.0149	16.3934	16.8609	17.1686	17.6302	18.2506	19.1085
	9.15298	8.83424	8.68737	8.72803	9.15347	8.52166	8.7692	8.37551	8.48147	8.23853	8.06234	8.15921	8.61917	8.41087	8.52534	8.94801	8.20721	8.59729	8.93942	9.04435	8.91115	8.92388	8.82925	8.87275	8.38938	9.92114	9.92183	10.8952	11.1412	11.4259	11.6124	12.0869	12.9659	12.5297	12.8442	13.3991	13.9584	14.6721	15.1272	15.8521	15.6207	16.1477	15.6525	16.4567	16.6001	17.1696	17.7023	18.4799	19.1501
	8.09294	8.13485	7.82797	7.86343	8.19958	7.58482	8.15026	7.90459	7.62041	7.27456	7.29691	7.41828	7.88383	7.90953	7.88581	8.24786	7.2564	7.69599	8.42831	8.11001	8.12845	8.09255	7.96703	8.07297	7.84745	9.15092	9.35103	9.98773	10.2044	10.4261	10.6093	11.3683	11.9205	11.7897	12.0283	12.7459	13.5496	13.8494	14.5875	15.236	15.294	15.7045	15.3108	16.348	16.635	17.2346	17.477	18.09	19.9421
	17.8716	15.8991	16.3952	16.4578	16.2671	16.5971	17.4776	18.0563	17.7646	17.9376	18.0217	17.4954	17.5191	17.8832	17.1142	17.554	17.6189	18.5528	18.1831	17.8786	17.511	16.6428	16.6358	16.8274	16.7614	18.0226	18.0061	19.0509	19.1629	19.2097	19.1359	19.7565	19.9744	20.2425	20.9339	21.6634	22.6789	24.1663	24.4594	25.2941	25.8812	26.8915	27.4258	28.2984	29.3602	30.233	30.8827	31.7707	32.8537
	30.4696	28.7471	29.245	29.6319	29.043	29.6545	30.3313	30.9529	30.7896	30.9364	30.3666	30.8147	30.5013	30.7048	30.1859	30.6492	31.0226	31.5392	31.8269	31.5203	31.211	30.539	30.248	30.7365	30.6137	31.6798	31.396	32.9547	32.6926	33.8273	33.5688	33.8837	34.9737	36.3139	36.936	38.396	39.9189	42.4322	43.9561	45.5619	46.7396	49.0702	49.98	52.207	54.1763	55.7036	57.6469	59.0936	61.1885
	21.0077	19.4194	20.0367	19.7443	19.3487	20.1053	20.3418	20.8182	21.355	21.3555	21.0064	20.495	19.2545	19.8602	19.7738	20.5106	20.9462	22.1259	21.7837	21.3031	21.3887	20.2806	20.8267	20.8444	20.4539	21.8361	20.4849	22.4952	23.211	23.7009	23.9422	24.0364	23.1192	24.1129	25.2655	26.2771	26.9826	29.2182	29.5619	31.3057	31.3948	32.7203	33.7225	36.6356	38.5533	39.5289	40.4684	41.9524	42.2899
	25.032	23.1791	23.2379	23.2692	22.9173	23.9481	24.1765	25.1846	25.0431	25.7005	25.7805	25.9309	25.7208	26.5751	26.1936	26.5079	26.4676	27.038	26.9644	27.3557	26.8441	25.7273	26.0007	26.1402	25.7674	27.5732	27.5396	29.0421	29.1148	29.815	30.1341	30.789	31.4507	31.9097	33.3505	34.0612	35.5669	37.9113	38.7543	39.6148	40.2723	41.8303	42.8528	43.6963	44.7498	46.3933	47.205	47.7732	48.7586
	38.7168	36.7855	36.863	37.0928	36.6748	37.5778	38.0307	38.2112	38.5935	38.4824	37.96	38.2194	37.8083	38.3894	37.9819	38.3399	38.3819	38.8265	39.2089	38.8775	38.5517	37.2183	37.5456	37.9458	37.3118	39.2328	38.8755	40.137	40.9863	41.8649	42.4114	43.7033	44.2991	45.6714	47.1244	49.0856	50.9048	53.6248	55.0202	56.8993	58.3654	60.6774	62.0315	64.2815	66.749	68.9867	70.2488	72.2489	74.3572
	29.1883	27.4206	27.2749	27.7685	27.2749	27.9773	28.4475	28.9303	28.5882	28.6747	28.062	28.3302	28.0226	28.7248	28.1432	28.5366	28.5014	28.9903	28.7924	29.0044	28.911	27.6747	27.6795	28.0051	27.4881	29.1268	28.9638	29.9396	30.6619	30.8006	31.5725	32.1206	32.8464	33.7339	34.9244	36.1714	37.6711	39.7476	40.1886	41.6664	42.3512	43.8425	45.1408	46.0377	47.3932	49.0468	49.494	50.9792	52.0078
	32.8046	30.7973	31.0521	31.2728	30.8824	31.4615	32.2945	32.8062	32.427	32.6977	32.0825	32.1002	32.037	32.6383	32.2335	32.59	32.8425	33.3748	33.2869	33.3984	32.9189	31.5491	31.9731	32.4061	32.1493	33.6708	33.5439	35.2308	35.507	36.4416	36.7327	37.177	37.5805	38.6254	39.6588	40.7035	41.8039	44.1959	44.6244	45.4736	46.3659	47.5841	48.9156	50.1774	51.9444	53.5536	54.2094	55.2171	56.6357
	42.489	39.9137	40.0258	39.8215	39.5014	40.1743	40.7869	41.0715	40.6562	40.3298	39.7156	39.5112	39.2997	39.8635	38.8373	39.4501	39.0057	39.5928	39.6746	39.7342	39.5052	37.6603	37.9846	37.8083	37.3569	36.5833	35.797	37.2179	37.2105	37.8009	37.4425	38.019	37.8386	38.271	39.0075	39.8103	40.9202	42.9153	43.4053	44.7752	45.0269	46.0466	47.2101	48.1846	49.2529	50.7074	51.5763	52.4173	53.7111
	27.817	19.4817	13.2624	13.1247	13.0332	12.1485	12.9761	12.4257	11.5399	11.7817	11.3575	11.457	13.5659	12.1912	13.0618	12.5715	13.4087	12.717	11.9347	11.8442	12.469	12.1275	12.1766	11.7542	10.9099	12.4095	11.4486	13.2054	12.9932	13.9659	14.6014	15.5728	16.668	17.3016	18.9698	20.9917	21.716	23.2529	24.1985	26.1608	28.3359	29.796	30.548	33.1965	35.2436	38.1821	39.0545	40.6267	41.8106
	16.7505	10.0266	3.87317	2.50215	3.60125	2.99477	2.72106	2.46795	1.08938	2.09953	1.51757	1.09116	2.97302	1.67334	2.65568	2.39136	2.84306	2.23448	1.67167	1.95	2.09807	2.27157	1.77298	1.69258	0.343652	2.92457	1.50089	3.45661	4.02565	4.75508	6.2552	6.98829	7.50955	9.44165	10.5874	12.5182	13.9279	15.3792	16.4674	18.7971	20.1662	21.565	22.8508	25.8077	28.3604	29.9016	30.9208	32.6232	34.8926
	13.626	6.41634	0.240761	0.557769	0.232162	-1.14365	-0.0857774	0.255758	-1.23707	-1.44151	-0.731977	-1.3369	0.614349	-0.805277	-0.0563829	-0.148322	0.869553	-0.178862	-0.99906	-0.260737	-0.536874	-0.255912	-0.609608	-1.10217	-2.0481	-0.214141	-1.04061	-0.113727	0.477494	1.12507	2.05484	1.84491	3.12832	3.50605	4.60069	6.97919	7.69625	9.10709	10.1248	11.9955	13.4813	15.1702	15.7642	17.9014	19.4199	21.5856	22.2435	23.3658	25.1122
	18.9073	11.7104	5.16418	5.09189	5.24949	4.27615	4.83851	4.72485	4.0554	4.13346	4.29912	3.73579	5.28922	4.34445	5.66132	5.41037	6.28624	4.83789	4.3005	4.47275	4.79437	5.76557	5.02853	4.86136	3.88005	5.5494	4.50988	5.90708	6.27771	6.88864	7.51704	7.5336	8.30889	8.47076	9.12027	10.8448	11.3243	12.2134	13.0122	14.5784	15.3673	16.5921	16.6753	18.7966	20.0546	21.7963	23.4554	24.206	25.9575
	19.0116	11.5784	5.87085	5.25612	5.22604	4.08524	4.80626	4.71069	3.8858	3.96734	4.18846	3.43193	5.29425	4.12351	4.95913	4.72287	5.81562	5.23945	4.09023	4.41765	4.53267	4.22238	4.94435	3.96306	3.08173	4.60172	3.94693	5.51502	5.24439	6.51967	6.92975	7.95386	8.7159	9.82151	10.7713	12.681	13.7423	14.8214	15.9874	17.6397	19.4103	21.0409	21.8447	24.0319	26.0541	28.0154	29.5687	30.7601	32.8431
	23.1747	15.5386	9.43207	8.85945	9.35602	7.47391	8.41688	8.6102	7.47271	7.65761	7.58499	7.18705	8.89631	7.74034	8.90611	8.3102	9.34659	8.42587	7.29703	7.44918	7.9393	8.05475	8.40719	7.77935	6.72403	8.70893	7.62064	8.48243	8.17533	8.60819	9.51734	9.53995	9.86355	10.0759	10.8942	12.1878	13.1832	13.5993	14.0959	15.1481	16.0244	16.9282	17.6975	18.9086	20.9963	22.1935	23.4056	23.9147	26.2161
	25.7873	27.6953	28.2573	25.9172	29.3046	28.7351	28.3149	29.907	29.6068	29.2616	29.6978	29.7262	30.6552	28.2662	26.4133	26.0545	26.1897	26.4035	26.2974	27.4155	27.8881	27.121	26.6147	26.7829	26.9604	28.3269	28.3491	29.3888	30.504	33.5171	34.4324	35.7553	37.2879	38.7024	41.1913	43.463	44.9966	45.5845	46.7321	49.1987	48.6596	50.405	49.6394	52.3491	52.8866	52.8194	53.2412	54.5904	55.1428
	40.6258	42.3199	42.5802	39.4193	42.9075	42.6249	42.1133	44.1924	43.7175	44.0348	43.3521	43.4634	45.2997	42.6443	40.6933	39.9088	40.7626	41.0271	41.3113	42.4431	42.261	41.6706	41.5297	41.9133	42.0263	42.7147	42.8644	43.9816	45.0371	47.7339	48.7797	50.4839	51.9441	53.5625	55.6979	58.1856	60.1778	62.1908	63.5692	66.5942	66.8676	68.6856	68.7677	72.3252	72.27	72.8533	73.5427	75.3267	75.8916
	26.6363	28.368	28.4394	25.9928	28.8579	29.4969	28.009	30.5517	30.1358	29.8263	29.5821	29.7308	31.101	29.1597	27.8229	27.0882	27.4865	27.476	28.1586	29.0068	29.4207	28.6653	28.5635	29.2269	29.5116	30.3956	30.101	31.1935	31.9501	34.4924	35.3608	36.6753	38.3793	40.3403	43.023	45.6236	48.0958	50.9171	53.0375	55.7793	56.9251	59.1742	60.8865	64.7069	65.7292	67.5446	68.462	71.0892	71.8692
	11.3236	12.5873	13.1243	10.6532	13.3172	13.6222	13.4608	14.5854	14.356	14.5239	14.4417	14.6864	15.6746	14.4203	13.3438	12.6923	12.9569	13.0774	13.9081	14.068	14.7808	14.2233	14.4117	15.2936	14.793	16.9032	17.1802	18.5727	19.8318	22.8209	24.4725	26.3639	28.6996	30.6061	33.5174	36.8239	38.8023	40.8353	42.3694	45.0378	46.0131	48.0848	48.5648	51.2502	52.3763	52.9529	54.3846	56.6613	56.8176
	10.3544	11.732	12.4939	9.95347	12.831	12.1603	11.9821	13.0634	12.9748	13.1022	13.0594	12.7899	13.591	12.2879	10.7869	9.69047	10.3543	10.3728	10.5092	10.7689	11.5007	10.8109	11.0066	11.3529	11.2233	11.2121	11.5542	12.8795	13.0782	15.2696	15.9419	17.3353	18.523	19.3489	21.7521	22.8467	24.9599	26.3258	27.3211	29.4059	29.7074	31.0898	31.4333	33.8664	34.2018	34.2773	34.8152	37.2077	37.3823
	22.9179	24.5765	25.0787	22.4535	25.6763	25.5771	24.8709	26.7581	26.23	26.8953	25.7486	26.1547	27.02	24.8318	23.0399	22.9343	23.5668	23.6587	24.0978	24.9653	25.1495	24.0718	24.352	25.2854	24.5328	25.2183	25.6747	26.7719	26.4729	29.1644	29.6899	31.3035	32.195	33.5985	34.7623	36.9841	38.8991	39.9366	40.395	42.1869	42.7279	43.9517	43.9777	45.9674	47.0544	47.1446	47.8707	49.6723	49.8857
	20.1768	21.8453	21.9032	19.1367	22.3329	22.1854	21.3791	23.0455	23.2087	22.5803	22.0551	22.5561	23.8314	21.5521	20.4481	19.9597	20.3742	20.0963	21.3565	21.6468	22.3855	20.9495	21.3372	21.2714	21.553	22.377	22.9627	24.2396	24.8159	27.4412	28.5609	29.282	31.3765	32.7599	34.9945	37.0772	39.9121	41.0502	42.1181	44.0559	45.3123	46.2534	47.6024	50.1093	50.8041	51.353	51.8311	53.986	55.0324
	1.75121	2.71659	2.81016	1.19328	3.13642	3.33282	2.74641	4.37922	4.17508	3.98101	3.66962	3.85611	4.85506	3.49239	2.32311	1.57564	1.7833	2.3877	2.79958	3.1063	3.57001	2.88421	3.09849	3.04125	3.77648	4.32299	4.45994	5.9764	6.69988	9.15887	9.87171	11.1179	12.2591	13.7015	15.7357	18.0982	19.0669	20.2962	21.3212	23.2251	23.8107	25.0311	25.3492	27.9179	28.4968	27.6418	28.5723	29.9769	30.7269
	18.4664	19.736	20.0792	17.9521	20.9597	20.4747	20.3934	21.504	21.4835	21.4152	21.3704	20.8779	22.3363	20.9426	19.2818	18.8973	19.5359	19.4922	20.1403	20.6166	21.4297	20.614	20.8653	20.7228	21.368	22.0624	22.0658	23.1369	24.1689	26.2949	27.3895	29.4714	31.2021	33.0514	36.0176	38.4201	41.2205	43.1792	45.1904	47.8972	49.2815	51.5139	52.8468	56.5986	57.727	58.8017	59.6838	62.3077	63.251
	16.7138	17.9837	17.9212	15.8268	18.4594	18.1388	17.7612	19.5261	18.9394	18.8169	18.4928	19.0566	19.0978	18.1702	16.1495	16.0932	16.3716	17.2208	17.203	17.5282	17.9089	16.9116	17.6362	17.2346	17.6806	17.8077	17.8655	18.8815	19.8484	21.8035	22.4397	24.1602	25.498	26.6131	29.0954	31.0452	33.6673	34.5309	36.1734	38.3699	39.476	41.8179	42.2055	45.8436	46.7319	47.0309	48.9944	51.5157	51.8633
	20.3596	21.7599	21.2298	18.5692	21.9329	21.5527	20.9032	22.3489	22.0728	22.1193	22.0227	21.3658	23.2125	20.8726	19.2097	18.7135	18.9508	18.9566	19.6026	20.1995	20.2555	19.9935	19.7868	19.6951	20.1016	20.0637	20.2852	22.3715	22.4167	24.9593	25.5957	27.4317	28.6233	29.9978	32.1804	34.646	36.4558	37.6075	39.5253	41.5828	42.4938	44.122	44.4274	47.5204	47.9768	48.067	48.9799	51.1926	51.928
	18.1583	10.2673	8.87568	8.14738	7.61495	7.85715	7.48368	7.33071	7.53358	8.00374	9.27119	3.54127	4.6681	7.87396	6.67799	7.37933	7.53037	5.08241	10.5827	6.73989	5.1032	5.79555	5.25838	3.50702	5.10796	10.1915	10.1318	11.0219	15.6943	11.979	16.8298	15.4854	15.7465	17.2263	15.2116	18.8586	19.373	20.7808	21.807	27.0015	24.7545	26.1387	24.8764	28.3538	32.3015	33.0071	34.001	32.2317	34.4033
	23.0231	15.0352	14.137	12.7702	13.0423	12.7257	12.6856	12.6068	12.6692	12.8583	14.2914	8.9955	9.98964	12.9627	11.7592	12.0034	13.1184	10.3598	15.7515	11.7447	10.2505	10.7351	10.0074	8.21728	10.3587	14.5697	14.2118	15.7967	19.8767	17.4572	22.3518	21.4142	22.4385	24.0716	22.061	25.5915	26.7934	28.4308	29.8782	35.7925	33.2687	33.7523	32.873	36.9328	40.5791	41.1613	42.4422	39.9193	42.3691
	11.1946	3.82385	1.85672	0.743464	0.756503	0.35616	0.0887551	-0.0678709	-0.0764782	0.391225	1.61367	-3.97564	-2.03014	0.562281	-0.660598	-0.577457	0.0865618	-2.45802	2.83063	-1.10035	-2.40052	-2.28498	-2.78507	-4.88784	-2.16966	0.0657425	0.344645	0.944886	4.99499	1.24572	5.94079	3.36585	3.60336	4.18564	1.56864	4.13634	4.50621	5.36675	5.87538	10.8728	7.27355	7.85355	6.41819	8.96906	12.3264	12.1062	13.0681	10.3857	12.1091
	70.3251	62.6353	61.8734	60.4809	60.0071	59.8271	59.5971	59.0868	59.5802	60.3463	61.1468	55.0512	56.919	60.4198	58.8513	59.7559	60.0863	57.5922	63.4099	59.0819	57.9237	58.6899	58.0599	55.8556	58.1368	65.7852	66.481	68.3464	73.9808	71.6227	77.1636	78.2596	79.59	82.3057	82.2015	85.6132	88.0652	90.4055	93.095	99.1853	96.931	99.6006	97.4993	103.379	107.308	107.392	108.923	105.896	108.389
	22.5441	14.7236	12.1726	11.9155	11.4437	11.1022	11.4326	10.7843	11.0294	11.6435	12.728	6.71919	8.16055	11.4499	10.0161	10.9793	11.1743	8.38472	14.3256	10.1746	8.53219	9.0705	8.47272	5.96906	8.88352	11.9432	11.9426	12.1362	16.2055	12.4453	16.4172	14.6519	14.2379	14.6394	11.9626	14.3628	14.8184	15.4873	15.9507	20.9213	17.9479	17.9706	16.7802	18.6639	22.2353	22.3149	22.6864	20.2614	22.0445
	15.2741	7.50915	6.25332	5.48424	5.0116	5.04728	4.98748	4.64998	4.57478	5.33932	6.17954	0.550868	1.766	4.97889	3.94018	4.29126	4.99783	2.051	7.5473	3.44452	1.85283	2.36012	2.10798	-0.402769	2.08742	6.15695	5.92778	7.01888	11.4028	8.63553	13.0795	11.9028	12.2552	13.5168	11.4486	14.6404	15.7466	17.0743	17.8581	23.0977	20.5143	22.1798	21.1281	23.5841	28.341	28.4833	29.7511	27.6089	30.0905
	20.0662	13.4558	11.5692	10.5636	10.4592	10.7045	10.8304	9.96405	10.4582	11.0243	12.0605	6.29315	8.59078	11.0442	9.95323	10.2261	11.4991	7.99436	14.6272	10.2868	8.40261	8.81169	9.08044	7.15719	9.48955	15.9382	16.5177	16.2296	21.6283	18.4717	22.1437	20.5639	22.0953	21.2561	19.409	22.1534	23.052	23.3054	24.5352	29.1653	25.8652	26.1047	24.4321	27.3205	31.1858	30.1173	31.586	29.6524	32.1277
	41.2014	34.048	32.3051	31.7199	30.5514	30.7139	31.0004	30.7046	31.4001	30.8777	32.2001	26.0681	27.6195	30.8045	28.3542	29.9253	30.2981	27.8495	33.5407	29.5342	28.1524	29.3004	29.368	25.8244	28.031	33.5584	33.2182	35.2664	39.4932	36.4711	42.614	41.4587	42.0635	44.1964	43.0786	46.9877	48.6703	50.5087	53.3947	58.6557	57.057	58.3284	57.4137	61.3876	66.4977	66.482	68.533	66.8425	69.5119
	26.9138	19.7143	17.8048	16.6262	16.4424	16.1107	16.722	16.1928	16.2193	16.6408	17.7821	11.6477	13.4145	16.0462	14.891	15.4567	16.3541	13.599	19.5046	15.4436	13.6445	13.8065	13.4903	11.7392	13.9052	18.6115	18.7585	20.5689	25.2253	22.5356	28.0981	27.5749	28.2506	30.1693	29.031	32.5346	34.5775	36.2544	38.3498	44.5986	41.7811	43.0568	42.3479	46.0068	50.4109	51.2592	52.2773	49.7912	52.1192
	48.1066	40.1005	38.7575	38.1821	36.5687	37.0852	37.1745	36.5469	37.0719	37.8914	38.3967	33.5839	34.8762	37.8398	36.6091	37.5669	37.9798	35.5519	41.1731	37.6054	36.4947	37.2171	36.6363	34.8706	35.9733	43.176	44.375	45.7748	51.8432	49.2576	55.5919	55.6064	56.8057	59.9753	59.6081	63.7455	65.4327	68.1169	69.617	76.5628	74.1308	76.2571	74.0863	79.3925	84.0043	84.5406	86.3611	84.3143	87.4824
	25.9926	18.9206	16.9771	16.6016	16.1755	16.2258	16.2351	15.6066	15.5557	16.3886	17.1995	11.3695	13.5647	15.968	14.5779	15.8775	16.2951	13.6432	18.9645	14.8812	13.9372	14.026	13.7158	11.6942	13.761	17.3679	16.9808	18.1721	23.0809	19.7437	24.3186	23.5775	24.4198	26.0437	24.2084	27.71	29.0509	29.9766	31.5273	36.9482	34.3548	35.5216	34.1498	37.2908	41.4907	41.8213	43.1496	40.824	43.4485
	57.0591	49.0079	47.6442	46.9535	47.1646	46.6504	46.6298	46.0424	46.455	47.2922	48.3027	42.1109	44.3415	46.9053	46.3546	47.5573	47.8569	45.6902	50.9766	47.6381	46.3786	46.9491	46.515	44.2886	46.2792	55.7256	55.4809	56.7084	62.3394	58.0911	62.9956	62.0508	63.2718	64.0036	61.3661	64.5176	66.3581	66.299	68.3663	73.3718	69.7514	71.2066	69.0573	72.2194	77.0027	77.3557	78.4033	75.6353	77.9336
	32.5909	25.1386	23.3523	22.5354	22.1717	21.4416	22.2153	20.8744	21.0555	21.8807	23.317	17.5698	18.6437	21.829	20.3045	20.6569	21.0352	18.7293	23.6084	20.1733	18.2207	18.5943	18.4245	15.8244	18.2662	22.6468	22.487	24.2889	28.8277	25.2528	30.8984	28.7283	29.8896	31.4086	29.4727	32.4195	34.2225	34.7968	36.8479	41.7406	39.1399	40.4138	38.6118	42.5054	46.4078	46.5251	47.7375	44.9191	47.7939
	20.2187	12.8771	11.033	10.138	10.0111	9.51954	10.0621	8.80965	9.07276	10.1322	10.9698	5.69402	6.76449	9.47948	8.71832	8.68564	9.22014	6.49525	11.8208	8.02491	6.55256	6.95634	6.7064	4.3232	6.6775	10.1332	10.6021	11.3473	16.1858	12.72	17.5661	16.3291	16.7859	18.6337	16.5215	19.8196	21.1314	22.5111	23.799	29.3748	26.9893	28.7626	27.2275	30.6519	34.9981	36.0212	37.1218	34.9412	37.8224
	40.056	32.3548	31.075	30.0896	29.743	30.0441	29.7639	29.8862	29.5769	29.8693	30.8161	25.5425	27.2862	30.4539	29.4128	30.2118	30.3656	27.7925	33.3122	29.2555	28.3276	28.4686	28.6614	26.3177	28.2046	36.1247	35.8263	36.9237	41.2844	37.87	43.473	41.8952	43.0853	44.1152	41.9413	45.1597	46.664	48.4933	50.3637	55.3527	53.3346	54.7535	53.3887	57.7959	61.4659	62.0802	64.5741	63.1323	66.6927
	50.6154	43.321	41.2053	41.1335	40.4402	40.1358	40.8589	39.8877	40.4648	41.3875	43.1403	36.5524	36.6588	40.484	39.0111	40.6811	41.1189	38.0724	43.7739	39.7807	37.675	39.7589	38.9496	36.8314	39.2456	47.0118	48.7759	49.2879	54.1644	52.1238	57.6206	58.6582	57.8375	60.3082	57.8754	61.7607	63.7579	65.5657	67.0426	72.174	69.6625	72.399	71.7476	74.9751	79.0597	80.8822	81.4456	79.9215	81.6647
	39.027	31.7267	29.7768	29.5838	28.9506	29.3101	28.4664	28.5189	28.3564	29.1562	30.06	23.7424	25.697	28.4836	27.4547	28.5697	28.5839	26.044	31.2472	27.4738	25.7906	26.3332	25.8928	23.6668	25.9177	31.9038	33.101	34.6853	39.6608	36.8984	42.2201	42.0218	42.806	44.6835	42.9426	46.3443	47.7604	49.8639	51.1609	57.5719	54.8065	56.0698	55.2051	58.9969	63.4229	64.2065	65.4965	63.6537	65.696
	23.7661	16.3881	14.2177	13.4426	13.1761	13.6666	13.2616	13.3703	13.1295	14.3048	14.8971	9.16447	11.1188	14.2503	12.8974	13.4267	14.1657	11.5465	17.7112	12.9219	11.4007	12.1922	11.5315	9.00255	11.0291	14.4726	14.1549	16.2333	21.8454	19.0792	24.8863	24.072	25.3429	27.95	26.4441	30.6372	32.1432	34.6946	36.0036	43.2376	41.1415	43.2441	41.8682	45.2789	50.9023	52.4321	54.3101	51.302	54.4202
	23.0153	16.3991	13.9282	14.183	12.5571	13.2349	13.6244	12.5347	12.7942	13.2648	14.5838	9.29136	10.457	13.6499	12.1515	13.487	12.9399	11.5772	16.7202	12.4153	11.3166	11.7811	11.6619	9.01844	11.6844	18.0139	18.88	20.1272	24.8003	21.9913	27.6241	26.726	27.8765	29.9479	29.5395	33.6045	35.169	38.5373	40.9173	47.2408	45.4424	47.6555	46.9167	51.4799	56.9771	58.3614	58.8918	56.6572	61.3178
	10.7166	2.83888	0.00505679	-0.457816	-0.574071	-1.23199	-0.855199	-1.09296	-0.97667	-0.114194	0.751696	-4.68963	-3.55749	-0.779944	-1.34081	-1.87557	-0.59484	-3.17345	2.43413	-1.60226	-3.14773	-3.03703	-2.88353	-5.65955	-2.66802	0.492478	-0.10562	0.533966	5.41711	1.66755	6.20278	4.46911	4.20195	5.98259	3.43505	6.54332	8.14373	8.96575	10.0945	16.1464	12.551	14.8792	13.4544	16.3464	20.1477	20.9756	22.1965	20.0702	22.3334
	51.2593	43.7014	42.1519	41.9735	41.3788	40.5513	41.3223	40.4438	40.6194	42.0253	43.2676	37.397	38.8828	41.53	40.5709	41.0004	42.0533	39.2046	45.4193	40.494	39.4563	39.673	40.1887	36.4359	39.8717	45.083	45.085	46.5027	53.3393	49.6034	56.2751	55.9416	57.5626	60.768	58.9314	63.9417	66.9754	70.1566	72.963	79.302	77.2814	79.6877	78.3661	82.9754	87.9312	90.3689	91.2306	88.6217	91.1973
	30.0988	22.6299	21.7827	20.7774	19.9723	20.1643	20.0634	20.2083	19.2106	20.5597	21.7432	16.0389	17.5506	19.9867	18.4586	19.6965	20.015	17.5263	22.8772	18.4936	17.5102	17.7751	18.2245	15.1838	17.7957	22.5848	23.1034	24.1082	29.0895	25.4692	31.4794	30.231	30.7034	33.1893	31.1912	35.5973	36.6884	38.6342	41.3729	46.7026	45.055	47.5053	46.4428	51.036	55.3387	56.7463	57.7898	56.3862	59.4705
	43.9239	35.4134	33.249	32.6998	32.1822	32.2579	32.0618	32.2818	32.3016	32.4075	33.1389	27.4308	29.1578	32.3747	31.2782	31.7965	31.5564	29.1516	34.9776	30.6449	29.4701	29.9783	29.8493	27.4182	28.7999	33.1625	34.1107	35.3184	40.9231	38.2393	43.8097	43.4673	45.2573	47.763	46.1732	51.1412	53.6855	54.8176	58.7856	64.3894	63.5219	65.4584	63.9185	69.5703	74.1301	75.7608	78.4112	75.6067	80.0252
	41.3752	34.1883	32.3121	31.8358	31.638	31.2663	31.2504	31.0167	31.3506	32.2482	32.8055	27.3072	27.4907	31.2835	30.6364	31.2215	31.3696	28.9202	33.9118	30.0015	29.0847	29.2234	28.3502	27.1445	28.7473	33.8652	34.2271	36.3431	40.8996	38.5739	44.1346	43.02	43.7151	45.6917	43.2374	46.4921	47.9864	49.511	51.1046	56.6218	54.2633	55.3412	54.0667	57.4752	62.3345	62.5905	63.8643	61.9864	65.2868
	21.9524	14.4424	12.5307	11.405	11.377	11.5536	10.8615	10.977	10.8182	11.192	12.6111	7.04413	8.32536	10.9345	9.92273	10.583	11.0426	7.84157	13.5968	10.1344	8.28078	8.89897	8.37735	6.20551	8.93851	12.7977	12.8895	13.818	18.2599	14.4775	19.5669	18.4856	19.1267	20.7438	19.3123	22.2755	23.884	25.8103	27.5943	32.9674	30.5035	32.6632	32.2491	35.4045	40.7989	41.5945	43.2511	41.3301	44.7768
	23.0646	15.6434	14.0596	13.2832	13.3182	12.42	12.3113	11.8599	12.602	13.3137	13.6731	8.32936	10.3262	12.4599	11.2094	12.5698	12.6572	9.71377	15.4659	10.9542	9.83474	10.8405	10.4496	7.23394	10.3792	13.5228	13.3855	14.668	18.7138	15.0941	19.6249	17.9115	18.3684	19.1618	16.3431	20.0908	21.9681	22.6395	24.691	30.0362	26.913	29.307	27.776	31.7601	36.6532	38.1077	39.8357	38.7397	41.1999
	23.455	15.5845	14.0554	13.4806	12.9432	12.5491	12.4885	12.2026	12.1164	12.7978	13.8267	8.76533	10.2595	12.8878	11.7094	12.1573	12.6928	9.86864	15.7364	11.8988	9.6904	10.3129	10.1735	7.64592	10.1345	13.8625	14.0769	15.4053	20.5275	17.7678	22.8819	21.9362	22.7625	24.5779	22.4769	26.2631	27.2602	28.8779	30.5518	35.7267	32.7769	34.6456	32.3104	36.2741	40.4274	40.4312	42.1835	39.2565	41.6964
	48.6106	41.2859	39.5614	39.0086	38.4725	38.1129	38.2708	37.8499	37.8816	38.6829	39.423	33.6718	35.0114	38.2726	36.9816	37.773	38.3819	35.4664	40.9137	37.7162	35.5002	36.6818	36.0381	33.5923	36.2537	41.3396	41.1982	43.0623	47.7394	44.4381	49.5838	49.0155	50.2003	52.0128	50.5415	53.8927	56.753	58.1553	60.6228	66.8997	64.5945	66.9035	65.5233	70.1588	75.5248	76.2712	77.9003	75.8737	78.8775
	52.4284	44.2296	42.7508	41.3494	41.0497	40.762	40.1335	40.5243	40.2339	40.8765	42.1387	36.0849	38.2274	41.0278	39.4901	40.4076	40.1	37.2002	42.8149	39.132	36.961	37.718	37.0537	35.0586	37.5388	42.4508	42.6435	43.3495	48.38	45.6508	51.5825	51.3524	52.2651	54.6797	52.9315	56.7379	59.2092	60.2277	63.2371	68.6384	66.6661	67.4993	66.0305	69.9722	75.4105	76.4501	76.8431	74.3815	77.317
	18.1792	10.5899	8.8739	8.08263	8.07533	8.1783	7.99364	7.87938	7.80846	8.21843	8.75173	3.57808	5.3799	7.31945	6.38724	6.87392	7.39548	5.03593	10.4	6.35143	5.60061	5.70943	5.48689	3.28519	5.46778	9.00114	9.1888	9.57883	14.2295	10.5741	14.8914	13.6779	14.464	15.883	13.3353	16.5718	17.9726	18.821	20.2082	26.0911	23.2886	24.819	23.9604	27.204	31.6361	32.1039	33.3487	31.7786	34.3288
Time (s)	0	2	4	6	8	10	12	14	16	18	20	22	24	26	28	30	32	34	36	38	40	42	44	46	48	50	52	54	56	58	60	62	64	66	68	70	72	74	76	78	80	82	84	86	88	90	92	94	96
[truncated: 220 more columns]

## Sheet: Figure2K-2M
IP3R1 shRNA	30.5917	32.3477	32.098	32.2714	32.5936	32.5854	31.5905	32.0311	31.7658	31.268	30.8644	30.8978	30.8963	30.6345	30.264	30.2189	30.1922	30.5024	30.1743	30.4994	30.0859	30.2987	30.5048	30.6089	30.1896	29.7452	29.8394	30.0332	30.2336	30.5383	31.5385	31.7395	32.2344	33.2583	34.283	35.1414	36.3814	37.7038	38.6605	39.7287	41.6037	43.0139	44.5506	45.4484	47.5761	49.0542	49.6124	51.233	53.1214
	18.0996	20.0619	19.9448	19.7149	20.1888	19.8656	19.8107	19.8068	19.5095	19.0455	19.1231	19.1167	19.5574	19.3594	18.9795	18.8688	19.0273	19.0952	19.1621	19.2057	19.1253	19.1594	19.3164	19.2169	19.2208	19.3169	19.3689	19.6704	20.2607	20.049	20.6446	21.0624	21.2523	21.6123	22.4074	23.3562	24.304	24.7476	25.658	26.3301	27.4588	28.3492	29.4736	30.5916	31.6873	33.1671	33.853	35.1169	36.1796
	21.3188	23.1654	22.3589	22.5256	23.0084	22.974	22.4469	22.6481	22.2598	22.0693	21.9293	21.8701	21.7899	21.7852	21.2599	21.3604	21.3873	22.0938	21.6188	21.6674	21.3647	21.6296	22.0391	21.671	21.9013	21.4689	22.1087	22.0052	22.3109	22.6963	23.0975	23.6996	24.0286	24.4522	25.9084	26.0082	27.0779	28.0342	28.8278	29.0807	30.6094	31.2098	32.4172	33.1305	34.5831	35.5233	36.4873	37.9246	39.1927
	28.9507	30.9437	31.061	30.9278	31.1757	30.9405	30.8044	30.75	30.33	30.2996	29.966	29.9864	30.2305	29.8555	29.6285	29.662	29.4171	29.5741	29.624	29.741	29.5426	29.9215	29.6195	29.5253	29.3731	29.8025	30.1956	29.9271	30.3373	29.8631	30.5025	31.1162	31.1026	31.5986	32.6732	32.9269	33.5145	34.1948	35.1207	35.0582	36.3839	37.0137	37.697	38.4827	39.3973	40.5003	40.993	42.4195	43.2715
	28.0214	30.0965	29.8915	30.1365	30.48	30.5943	30.2133	30.1745	29.6725	29.5972	29.4893	29.8593	30.1826	29.5585	29.6504	29.3744	29.3811	29.7119	29.2214	29.4867	29.2821	29.4427	29.6615	29.6224	29.7555	30.6667	31.0509	30.6937	31.3419	31.6069	31.6693	32.339	32.3612	32.7675	33.7478	34.1701	34.9342	35.9827	36.7598	37.1528	37.6528	38.6802	39.5484	40.479	41.4738	42.4105	43.0282	44.345	45.7483
	27.1926	29.3333	29.0784	29.0526	29.0675	29.3139	28.8481	28.9932	28.5826	28.5887	28.4108	28.5173	28.5464	28.2047	28.288	27.966	27.9326	28.0035	28.1118	28.1593	28.1431	28.4121	28.4226	28.3032	28.141	29.5387	29.5802	29.6546	29.4882	29.5849	29.8538	30.3388	30.3094	30.6212	31.49	31.546	32.3065	32.5967	33.0492	33.2665	34.1377	34.5362	35.1457	35.9588	36.5107	37.4173	37.7892	38.7926	39.5261
	48.0111	50.2226	50.2284	50.294	49.7983	50.467	49.8602	50.1373	49.3597	49.1278	49.0623	49.3569	49.5016	48.8399	49.1644	48.823	48.9121	49.3257	48.8703	49.0962	48.7316	49.154	49.1294	49.5421	49.1163	47.3211	47.3569	47.4829	47.7504	48.2994	49.1194	49.8302	50.2608	50.8354	52.4276	53.2746	54.0975	55.153	56.4245	57.336	58.6176	59.8875	60.8294	62.0531	62.9661	64.5469	64.8536	66.6004	67.8738
	25.4714	27.2435	27.1373	27.2362	27.339	27.4226	27.3442	27.2223	26.7048	26.5136	26.1913	26.511	26.609	26.1261	26.081	25.7348	25.9734	26.1115	25.9857	26.1607	25.8984	25.8242	25.991	26.0237	26.1123	25.0613	25.2301	25.7661	25.5059	25.7467	26.2007	26.513	26.817	26.9841	28.056	28.6314	29.4119	30.1185	31.0213	31.8898	33.0246	33.7992	34.8159	35.8353	36.9254	38.5817	39.3422	41.0225	42.2116
	28.9894	30.7073	30.9193	30.9774	31.1044	30.8669	30.7291	30.6516	30.522	30.5112	30.2381	30.2998	30.4852	29.7659	30.3235	29.8141	29.9049	30.0069	29.8997	29.4615	29.3378	29.6997	29.9235	30.1871	30.1007	32.6173	32.7901	32.7953	33.1085	33.006	33.7654	34.6239	34.5353	34.8666	35.9699	36.7935	37.6363	38.0872	39.3391	40.0853	41.8533	42.693	43.7465	45.4377	46.2068	48.1588	49.0445	51.294	53.0124
	21.896	24.0327	23.943	24.0182	24.3457	24.1815	24.0024	24.3073	23.5763	23.5778	23.3913	23.2228	23.9574	23.1141	23.1755	23.2685	23.3467	23.4163	23.1532	23.4418	22.9379	23.775	23.4366	23.4134	23.6129	23.4301	23.2777	23.3764	22.939	23.5868	23.5897	24.0605	23.9987	24.1886	24.8562	25.2309	25.7176	26.1684	26.994	27.2413	27.9589	28.6091	29.0165	30	30.643	31.9089	32.0696	33.2232	33.9193
	24.6079	26.2806	26.4739	26.4368	25.9841	26.3548	25.8886	26.0824	25.8428	25.6506	25.8301	25.495	25.7403	24.9795	25.0687	25.3441	25.2716	25.537	25.7953	25.7642	25.2115	25.9153	25.6343	25.6682	25.0899	26.5213	26.6509	26.4537	26.9831	26.6647	26.8396	27.0613	27.3872	27.1659	28.0827	28.5642	29.7305	29.2989	30.65	30.6815	31.8242	32.3781	32.6943	33.501	34.2588	35.5643	36.5243	37.2233	38.7014
	20.6671	22.8949	22.9822	22.9986	23.0015	23.0225	22.7783	22.6478	22.475	22.2529	22.0865	22.3373	22.4776	21.9208	22.1257	21.8896	21.8712	22.1814	22.169	21.9364	21.8898	22.196	22.2086	22.1817	22.1274	21.8047	21.9	21.9547	21.8165	22.059	22.3495	22.9083	23.0959	23.2206	23.6607	24.1293	24.9009	25.2409	25.7021	26.301	26.6033	27.377	27.7691	28.6627	29.2193	30.168	30.5373	31.3111	32.4504
	29.45	31.3954	31.2093	31.2743	31.9336	31.8313	31.4938	31.4094	30.7675	30.4439	30.6766	30.6502	30.7076	30.347	29.8931	30.8046	30.2681	30.4459	30.3738	31.0189	30.7667	30.933	31.4492	31.1341	30.9083	31.1959	31.2272	31.6262	31.6909	31.9051	32.6078	32.5595	32.7372	32.9486	33.8563	34.1192	35.032	35.2219	36.5012	36.4775	37.1785	37.972	38.1639	40.2613	40.6983	41.5915	42.3362	43.4127	44.9877
	19.1084	21.3895	21.2549	21.3041	21.321	21.3541	21.068	21.1085	21.0796	20.7522	20.6491	20.3401	20.648	20.7333	20.4071	20.2495	20.3603	20.5411	20.4667	20.7397	20.4748	20.473	20.5581	21.0983	20.9004	21.6903	21.6791	21.3915	21.7848	21.2672	21.6691	22.0888	22.519	22.744	23.2829	23.5355	24.5057	24.7707	25.4606	25.6482	26.3044	26.5359	27.2639	27.4272	28.4233	29.2583	29.456	30.2908	31.292
	24.9141	27.2334	27.0768	27.0162	27.4867	27.0481	26.9165	27.3897	26.9167	26.7823	26.5934	26.7593	26.9492	26.8081	26.4488	26.6169	26.5362	26.6174	26.469	26.7755	26.2627	26.6646	26.7463	26.8977	26.8997	28.3233	28.2161	28.1799	28.2362	28.0156	28.591	28.7883	29.0621	29.6143	30.1551	30.4518	31.2984	31.7418	32.28	32.5956	33.535	34.0801	34.1761	35.1354	35.4429	36.443	36.3183	37.7796	38.2795
	25.8765	28.0266	27.9777	28.0175	27.6354	28.1956	27.846	28.0023	27.7182	27.5325	27.2726	27.5611	27.7384	27.0922	27.3765	26.9873	27.1508	27.3992	27.6541	27.489	27.2073	27.3474	27.4894	27.3923	27.5912	27.7958	28.0208	28.389	28.1789	28.3363	28.7335	28.9235	28.9412	29.1638	30.1709	30.0467	30.6065	30.8155	31.3658	31.5942	31.9966	32.4802	32.8463	33.5682	33.9349	34.5098	34.5003	35.2191	36.0925
	17.0752	19.2908	19.0854	19.2887	18.9415	19.3436	19.0776	19.3423	18.9552	18.8634	18.6503	19.0173	18.686	18.5122	18.3375	18.7358	18.6903	18.7493	18.6307	18.538	18.6041	18.6168	18.7463	18.7654	18.7432	19.7891	20.0465	19.9663	20.0874	20.1358	20.3972	20.8756	20.6915	21.4187	22.1893	22.1749	22.7651	22.8076	23.9189	24.3678	25.1026	25.8648	26.4755	27.5668	28.1274	28.8708	29.1519	29.9245	31.1275
	12.9683	15.0469	15.2002	15.0358	15.7565	15.5141	15.3437	15.3954	14.9689	14.7757	14.9345	14.8872	15.3961	14.9862	14.8409	14.8205	14.5111	14.9962	14.9933	15.0912	14.9577	14.8071	15.198	14.9126	15.0179	15.8061	16.1715	16.1149	16.2086	16.0936	16.5489	16.7542	17.0985	17.3015	17.7559	18.3644	18.6706	18.9701	19.7525	19.9286	20.6165	21.1087	21.7737	22.3959	22.9296	23.4438	24.009	24.9099	25.8756
	21.6022	23.6789	23.7258	23.8547	23.6616	24.0048	23.6232	23.6061	23.5731	23.0983	23.1797	23.1133	23.2375	22.8921	22.7258	22.5968	22.6074	22.7678	22.573	22.7565	22.7357	23.0303	22.8082	22.7556	22.7252	23.7967	24.1201	24.5001	24.2783	24.7499	25.2116	25.6164	25.9826	26.56	27.6673	28.0526	28.8317	29.532	30.5701	31.2449	32.2131	33.1369	34.0082	35.04	36.2612	37.4064	38.0504	39.5294	40.781
	24.0855	26.5831	26.532	26.3226	26.8076	26.3981	26.6874	26.6081	26.1888	25.8084	25.9084	25.8249	26.1725	25.4849	25.6401	25.411	25.4227	25.29	25.153	25.3875	25.1291	25.6391	25.574	25.859	25.5776	26.6651	26.7677	26.7323	27.0111	27.1025	27.2294	27.7662	27.9604	28.4834	29.0299	29.5114	29.9231	30.4494	30.7782	31.2531	31.6728	32.3197	33.0949	33.6965	34.3661	35.6702	35.5512	37.0745	37.9526
	29.7173	31.9185	32.0565	33.1629	33.0587	33.2329	32.4047	32.6473	31.9735	31.8431	31.9564	31.922	32.1971	31.5482	31.3414	31.0437	31.0405	31.1006	31.3832	31.5719	31.216	31.6492	32.4199	32.5153	32.0482	33.0888	33.4505	33.1816	33.3736	33.8417	34.2019	34.4813	34.9147	34.875	35.4764	35.0521	35.9054	36.3334	36.837	36.7998	37.6039	38.141	38.0905	38.7328	39.5098	40.5355	40.273	41.4619	42.5991
	33.5714	36.0089	35.7238	35.8632	36.1255	36.3869	36.0096	35.9052	36.0923	35.4928	35.734	35.403	35.8178	35.3987	35.2005	35.0997	34.9818	35.1816	34.9735	35.5537	35.262	35.6795	35.6299	35.5131	35.2309	36.9229	36.8057	36.9347	36.5068	37.0515	37.4058	37.6222	37.8123	38.0971	38.5409	38.987	39.5088	39.9527	40.3501	40.1699	41.1268	41.2535	41.4119	42.0778	42.6982	43.6354	43.3878	45.0011	45.5622
	23.3475	25.8269	25.4098	25.3793	24.6838	25.6868	25.1025	25.2199	24.7762	24.594	24.5482	24.3355	24.5948	24.1948	24.0925	24.1052	24.2007	24.3264	24.4268	24.6485	24.1392	24.6145	24.1452	24.5185	24.5169	25.0826	25.3948	25.1309	25.5565	25.6138	25.9706	26.561	26.7554	27.0572	28.0103	28.064	28.8598	29.1811	29.8999	30.6374	31.1068	31.5008	31.9743	32.7317	33.6988	34.3036	34.8586	35.8114	36.9439
	22.4649	24.719	24.6917	24.7298	24.9991	24.8761	24.6272	24.4419	24.5326	24.3808	24.1737	24.1375	24.162	23.9288	23.9773	24.0105	23.5972	23.7887	23.7495	24.1073	23.9273	24.1283	23.9412	24.2701	23.9318	24.2666	24.8315	24.8298	24.634	24.978	25.464	25.1974	25.8036	25.5314	26.296	26.5243	26.8281	27.3608	27.9213	27.6357	28.4262	29.1248	29.2205	29.6617	30.2438	30.9334	30.4267	31.0872	32.0689
	19.8848	21.738	21.4684	21.473	21.6375	21.5936	21.5121	21.7439	21.4234	21.2736	21.0933	21.1074	21.4614	21.1588	20.8787	21.1491	20.8646	21.327	20.9194	20.9411	20.5628	20.8592	20.8989	20.695	20.786	22.206	22.6109	22.5573	22.4403	22.7317	22.8345	23.2086	23.221	23.2107	24.2276	24.2208	24.8209	24.9717	25.5563	25.6028	26.444	26.7744	27.3212	27.816	28.3193	29.3174	29.6691	30.5741	31.6784
	26.0667	28.1551	27.8839	27.9993	28.1118	28.0893	27.616	27.8044	27.5218	27.4927	27.4161	27.209	27.5033	26.9059	26.7749	26.9192	26.8199	27.066	27.3138	26.9981	26.9958	26.9505	27.2676	27.5927	27.1817	28.6394	28.7673	28.8584	29.1277	29.1114	29.2532	29.6749	29.8699	30.4069	31.4461	31.5	32.0491	32.3947	33.2041	33.367	34.0381	34.2973	34.7256	35.3975	36.1074	37.0377	37.3393	38.4295	39.4495
	33.0803	35.5773	35.3193	35.304	35.1511	35.5387	35.1877	35.198	34.5514	34.5554	34.2026	34.419	34.3781	33.7643	33.5051	33.4797	33.5534	33.9463	33.7943	33.9743	33.4181	33.7243	33.5178	33.9715	33.8993	34.9092	34.7949	34.6842	34.8962	35.0533	35.3452	35.9745	36.1866	36.2838	37.3454	37.6053	37.8484	38.5321	38.9914	39.0352	39.8565	40.7808	40.8271	41.377	42.5932	42.8461	42.804	44.1341	44.667
	30.3396	33.0478	32.6322	32.8512	32.9358	33.433	32.7813	32.8343	32.3376	32.3777	32.4888	32.3363	32.8531	32.2841	32.3295	31.8755	32.2865	32.1073	32.1194	32.4017	32.018	32.2729	32.4348	32.8081	32.1844	33.7931	33.9292	33.8599	33.7616	34.2049	34.3423	34.8584	34.8214	34.9114	35.9821	35.8607	36.4854	37.0975	37.5577	37.5421	38.1194	38.3728	38.6676	38.9426	39.341	40.2137	39.9998	41.0882	41.7413
	21.0882	22.5978	23.0311	22.3705	22.7678	23.1613	22.5141	22.7396	22.4033	21.8206	21.8436	22.0268	22.1376	21.7599	21.6011	21.4371	21.4222	21.5453	21.2228	21.6806	21.378	21.4126	21.5761	21.7846	21.7497	21.955	22.222	21.8084	21.9958	21.7383	22.514	22.5255	22.4463	22.9897	23.7325	23.8758	24.0648	24.2359	24.7575	25.2049	25.55	26.1714	26.7622	27.036	27.7568	28.5617	28.3869	29.0713	30.2592
	34.3488	36.7704	36.8005	36.5539	36.8727	37.0616	36.7321	36.7502	36.1346	36.282	35.8804	36.4091	36.3125	36.0728	36.042	35.8261	35.8822	36.1562	35.8744	36.0394	35.8976	35.9873	36.3111	36.2969	36.1358	37.3284	37.6323	37.569	37.7572	38.0072	38.0081	38.4807	38.361	38.2161	39.2562	39.6708	40.1046	40.3916	40.6637	41.143	41.4081	41.8697	42.3523	42.9392	43.472	43.6479	43.9497	44.7416	45.0446
	18.8173	20.3901	20.2793	20.3684	20.7995	20.6119	20.1115	20.8392	20.1289	20.4867	20.5022	20.481	20.9109	20.4047	20.5604	20.3892	20.1008	20.5273	20.0321	20.4531	20.2687	20.2666	20.6366	20.2183	20.5749	21.2085	21.74	21.5339	21.9606	21.7783	22.3689	22.9832	23.2217	23.5446	24.1847	24.5645	25.5361	26.1397	26.7428	27.0495	27.8427	28.8776	29.2049	30.0893	31.3235	32.7094	32.9036	34.041	35.679
	20.749	22.8578	22.3333	22.6343	22.839	22.5466	22.3968	22.7227	22.0395	21.8076	21.7763	21.7328	22.1352	21.6657	21.5392	21.9784	21.7678	22.1774	21.5475	21.9774	21.474	21.7229	21.5372	22.1359	21.6519	23.31	23.2911	23.4636	23.5826	23.6926	24.2561	24.6835	24.737	25.3183	26.3415	26.6808	27.3443	27.7026	28.5729	29.2793	30.2379	31.2876	31.3309	33.2427	33.4041	35.204	35.8389	37.66	38.3628
	16.6649	19.3194	18.7937	18.8869	19.1585	19.2701	18.8213	18.7072	18.5949	18.2741	18.1646	18.2745	18.876	17.9937	17.9156	17.9522	17.6721	18.221	17.9327	17.6686	17.8185	17.9678	18.1903	17.9262	18.0891	18.8755	18.8574	18.768	18.8784	18.8407	18.9257	19.7999	19.4852	19.5291	20.8789	20.8894	21.6447	21.9016	22.1533	22.3069	22.7154	22.9717	23.278	23.8301	24.2006	25.2367	24.9984	25.5918	26.5944
	28.0293	30.5259	30.2143	30.0829	30.0131	30.4089	29.8096	29.7135	29.4197	30.0619	29.6921	30.0192	29.7239	29.9382	29.6108	29.8638	29.7938	29.4972	29.4944	29.0543	29.236	29.0607	29.1452	29.3036	28.8734	28.415	28.184	28.7883	29.2263	29.512	30.219	31.0475	31.1228	32.0112	32.5623	32.889	33.5499	34.2754	35.1848	35.615	37.07	37.3107	37.5906	38.2052	38.4241	38.7949	39.0917	39.9231	40.4379
	26.8426	28.8779	28.5003	28.692	28.0035	28.5421	28.1274	28.0348	27.589	28.5115	28.5463	28.3805	28.623	28.4305	27.9835	28.778	28.8635	28.5813	28.5441	28.1891	28.611	28.7292	28.357	28.8929	28.5611	28.4009	28.3415	28.8706	29.0687	29.2411	29.9752	30.3905	30.6445	31.1812	31.5517	32.1301	33.0814	33.7294	34.5012	35.1778	36.3659	37.323	37.2692	38.3522	38.7525	39.849	40.3812	41.7707	43.0405
	31.6487	33.5776	33.6956	33.8923	33.6882	33.6526	33.2947	33.5754	32.9562	33.6344	33.9916	34.1008	33.9762	33.8813	33.9951	34.0328	34.3381	34.1072	33.6805	33.8504	33.91	34.0161	34.2116	34.4831	34.2486	34.4853	34.2179	34.831	35.0283	35.307	36.3199	36.5505	37.1965	38.026	38.5224	39.3269	40.9107	41.4119	42.6372	43.0064	44.7849	45.7401	46.8531	47.5655	48.1355	50.2173	50.55	52.6497	53.8127
	32.9804	34.7053	34.4975	34.2737	34.3508	34.426	34.6774	34.0548	33.5532	34.8419	34.6752	34.9144	34.6897	34.6688	34.478	34.8292	35.0192	34.7127	34.7459	34.5414	34.6113	34.9145	34.8698	35.4323	34.8109	35.0282	34.779	35.4194	36.4917	36.5072	37.7591	38.6072	39.0429	40.4107	41.8775	42.5933	43.7949	44.5047	46.6021	46.7995	48.5734	49.7666	49.4812	50.5348	50.1675	51.42	51.8964	53.2316	54.0447
	58.6676	61.1584	60.535	60.6958	60.36	61.1506	60.3242	60.3805	60.2848	61.1424	61.3139	61.1442	61.0019	60.5444	60.2472	61.1678	61.2255	60.7262	60.867	60.6129	61.0421	60.9338	61.4751	61.6194	62.0294	60.2113	60.5135	60.9182	61.7259	61.6223	62.9926	64.141	64.3054	65.8655	66.6778	67.7978	69.7282	70.6998	72.68	72.7714	74.8744	76.0876	76.0689	77.2886	77.6187	78.6765	78.822	80.8998	82.006
	49.5842	52.3874	51.8854	52.0395	51.9944	52.2637	51.8957	51.9736	51.6177	52.203	52.4928	52.2344	52.3792	52.3448	51.7221	52.328	52.7147	52.2959	52.401	52.1532	52.2874	51.9794	52.12	52.1441	51.9059	51.3864	51.4995	52.3252	52.826	53.7949	55.1911	56.3912	56.7129	58.2997	59.7655	61.245	63.2175	64.8462	67.1985	69.042	71.7117	73.4941	74.8303	76.4626	77.5075	79.2975	80.8538	83.1979	85.5454
	50.796	53.4206	52.8418	53.1519	52.9722	53.2778	52.9415	53.3582	52.4288	53.5382	53.2611	53.383	53.3396	53.3897	52.9934	53.7608	54.01	53.0656	53.538	53.7633	53.1262	53.197	53.2315	53.144	52.8784	52.6965	52.8053	53.7962	54.6707	55.8275	57.0721	58.7295	59.7519	61.8355	62.8716	64.0327	65.6346	66.7423	68.6402	69.1572	71.8318	73.3115	73.6821	74.6467	75.2137	76.3937	77.1069	78.985	80.2749
	52.753	55.3875	55.475	55.314	55.2308	55.442	54.8651	54.9925	54.5389	55.5749	54.9367	55.5181	55.3093	55.1888	54.5063	55.4275	55.0849	54.1867	54.7286	54.4805	54.3204	54.2663	54.7241	54.1486	54.229	53.3178	53.5568	53.9731	54.3464	54.6124	56.154	57.2137	57.2343	59.1901	60.0452	59.8351	61.3475	61.5562	63.2857	64.1985	65.928	66.7735	67.4691	68.1145	69.2045	70.2742	71.1434	73.3493	75.1408
	50.6265	52.9613	52.7678	52.5166	52.4634	52.4918	51.742	52.1573	52.0989	52.5618	52.2981	52.9069	52.3259	51.9762	51.8916	52.358	52.4013	51.799	52.0722	51.7548	51.7834	51.5485	51.9827	51.9048	52.0166	51.2162	50.4224	51.458	52.0749	52.0892	52.8368	53.4382	53.5697	54.7131	55.0206	55.9451	56.5286	57.17	57.8428	58.0866	59.9676	60.6287	60.4654	60.8476	61.0399	61.7132	61.532	62.4294	63.6948
	79.2632	81.2457	80.9405	81.3589	80.8587	81.8013	81.0178	81.2926	81.3748	82.0938	82.4668	82.8275	82.2249	82.5183	81.334	82.4921	82.5881	82.1806	82.7507	82.585	82.4105	82.1151	82.4133	82.6561	82.752	82.772	82.4879	83.7367	84.7145	84.3117	86.6632	87.138	88.1985	89.9291	91.1558	92.4189	95.0139	95.9226	99.0016	99.9527	102.286	104.271	104.328	105.708	106.453	107.444	108.477	110.381	112.657
	54.5001	56.3985	56.0782	55.9155	55.792	56.3814	55.5095	55.3704	54.836	56.2038	55.4252	55.7239	55.7966	55.7514	55.2643	55.8439	55.9256	55.531	55.1272	55.0069	55.1802	54.732	55.1516	55.1356	54.6444	54.0457	53.9476	54.7882	55.3864	55.5148	56.8676	57.6659	58.2093	59.4903	60.1992	60.4842	61.9498	62.4656	63.8527	64.2313	65.1343	65.5818	65.3114	65.8661	65.3689	65.7508	65.9174	66.7477	67.1744
	31.2606	33.6349	33.3234	33.5571	33.094	33.3885	33.2407	32.7467	32.327	33.2411	33.3033	33.2164	33.269	32.9161	32.6215	33.2222	32.9721	32.847	33.3676	32.8054	33.1372	33.033	33.0564	33.1478	33.0297	32.0892	32.08	32.74	33.1399	33.6717	34.3757	35.4117	35.5967	36.8112	37.8209	38.3721	39.5935	40.3011	41.471	42.7185	44.1405	45.1986	45.9686	46.9416	47.4504	48.4927	49.3419	50.8797	52.2253
	53.1907	55.5565	54.9606	54.841	54.6102	54.8248	54.0028	54.4057	54.0361	54.416	54.5553	55.1138	54.7404	54.3802	54.0787	54.7796	54.7626	54.6494	54.79	54.4351	54.2607	54.4678	54.7474	54.8682	54.711	53.8977	53.609	54.2916	55.5694	55.2896	57.0402	57.2368	57.7577	58.926	59.7029	60.0874	61.4801	61.4827	62.3594	62.0739	63.679	63.9271	63.5094	63.6607	63.1805	63.4049	63.0845	63.9707	64.6338
	60.1775	62.7959	62.2512	62.6414	62.4165	63.1875	62.1078	62.6087	61.8589	63.2995	62.5293	62.6984	62.953	62.6555	62.3049	63.1229	62.8825	62.4791	62.5783	62.2773	62.1505	61.9976	62.4127	62.2545	62.2138	62.5333	61.9231	62.7937	63.7285	64.0866	65.8131	66.3077	67.1271	68.811	69.9223	70.8341	72.5764	73.8029	74.9439	75.6337	77.2243	78.209	77.9785	78.1402	78.3746	78.8619	78.7258	80.2238	81.2835
	34.1483	36.6096	36.6645	36.6504	36.2523	36.6829	35.974	36.2119	35.7558	36.7622	36.9335	37.1319	37.3188	37.1382	36.8459	36.9518	37.3564	36.6636	36.6955	36.2699	36.3228	36.3486	36.5285	36.3039	36.2853	36.3224	36.5152	37.1643	37.1841	37.6299	38.0876	38.5356	38.4067	39.079	39.1507	40.0395	40.628	41.0858	41.8782	42.3906	43.6995	44.1983	44.5066	45.237	45.9904	46.7793	47.5817	49.7046	51.4067
	25.899	28.6976	28.4717	28.6761	28.4278	29.0425	28.2859	28.658	28.0088	29.0711	29.2125	29.0532	29.0959	29.2821	29.0387	29.637	29.4172	29.2272	28.9394	28.6353	28.5747	28.9077	29.0676	29.2641	28.7833	28.6606	28.3713	28.7287	29.2352	29.3096	29.4498	30.1492	29.8915	30.9606	30.9379	31.2024	31.6289	31.6125	32.3452	32.542	33.492	34.0024	33.8924	34.0607	34.4529	34.5518	34.9793	36.0144	36.7996
	45.5511	47.8979	47.9205	47.6491	47.5408	47.7972	47.4133	47.4685	47.0323	47.829	47.8092	47.6347	47.734	47.5753	47.2973	47.833	48.0243	47.5736	48.1306	47.4533	47.302	47.5473	47.8482	47.8898	47.8304	47.3927	47.3057	47.7327	48.1716	48.4844	49.4659	49.9246	50.505	51.4877	52.008	52.3676	53.8984	53.8978	55.1903	55.6217	57.1776	57.5108	57.8539	58.1501	58.4787	59.3679	59.2487	60.4353	62.023
	28.1216	30.4518	30.4028	30.6506	30.3998	30.6059	30.0313	30.0957	29.6021	30.7089	30.5029	30.7829	30.579	30.44	30.2576	30.663	30.6192	30.4681	30.6883	30.0937	30.1636	30.2699	30.4739	30.6894	30.5564	29.5336	29.7425	30.0152	30.1401	30.2785	30.7538	30.9905	30.6425	31.3226	31.5869	31.8212	32.1679	32.2488	33.0339	33.019	33.7368	34.0402	34.3117	34.445	34.3691	34.855	35.2241	36.3778	37.3712
	32.8977	35.2476	35.4183	35.2319	34.7884	35.5055	34.877	35.0544	34.5241	35.6762	35.1402	35.3314	36.0396	35.8873	35.1522	36.0886	36.2228	35.5076	35.5786	35.339	35.7099	35.3685	35.9079	35.8592	35.8744	35.2062	35.1787	35.2729	35.9332	36.0018	37.0358	37.444	37.651	38.3796	38.9926	39.6432	41.0676	40.83	41.9352	42.7858	43.5432	44.8659	44.7647	45.3147	45.6859	46.3373	46.9108	48.2789	49.51
	36.2758	38.4172	38.2497	38.1869	38.0258	38.5866	37.6848	38.0051	37.3577	38.53	38.3783	38.345	38.4639	38.4087	38.1032	38.6544	38.6553	38.7375	38.7641	38.5285	38.3747	38.3547	38.5976	38.6334	38.3357	37.4423	37.3763	37.838	37.8306	37.7958	38.3709	38.8059	39.036	39.785	39.8655	40.4004	40.9636	41.1421	42.1895	42.5629	43.4512	44.0098	44.374	44.9329	45.1549	46.3075	46.6003	48.3405	49.5219
	22.5062	24.7991	25.1009	25.1784	24.6861	24.9082	24.8691	24.9846	24.5268	25.4364	25.1091	25.4985	25.7281	25.6379	25.5277	25.642	25.6291	25.6386	25.8099	25.0272	25.1695	25.2998	25.3166	25.5003	25.0791	24.4039	24.5134	24.6717	24.744	24.7929	25.1986	25.7044	25.5647	26.371	26.4647	26.5763	26.8204	27.4481	27.5909	27.9323	28.7367	29.2795	29.0184	29.4506	29.6415	30.1085	30.0186	31.3514	31.825
	49.6576	51.882	51.5805	51.7115	51.3746	51.717	51.2515	51.1384	50.5947	52.1857	51.6284	51.7032	51.8276	51.814	51.0211	51.6697	51.7531	51.28	51.6436	51.0395	51.1379	51.6805	51.5431	51.6422	51.297	49.932	49.7885	50.1815	50.1464	50.2775	50.6981	51.2133	50.7897	51.554	50.9195	51.3523	51.9441	51.6547	52.6433	52.7368	53.0584	53.5747	52.9659	52.8185	53.1361	53.1126	53.3962	54.531	55.5498
	37.4524	40.2168	40.8701	40.9133	40.4512	41.091	40.4884	40.5993	39.7691	41.182	40.8955	41.2852	41.2127	41.1383	40.5016	40.9819	41.0078	40.491	40.6673	40.041	40.1998	40.1085	40.7447	40.6176	40.4212	39.8391	39.6809	40.042	39.9319	39.4678	40.3815	40.5006	39.9918	40.6676	40.8026	40.8256	41.0245	40.8778	41.8592	41.5134	42.3532	42.4919	42.4599	42.8832	42.9643	42.9728	43.2536	43.9019	44.6336
	37.9	40.5083	40.5708	40.6417	40.418	40.8191	40.2234	40.1721	40.0049	41.1193	41.0714	41.2397	41.423	41.2338	40.6319	41.1935	41.0872	40.73	40.8055	40.5488	40.6923	40.8183	40.9651	40.921	40.721	39.9718	39.9567	40.5386	40.8819	40.8151	41.656	42.2399	42.2986	43.1002	43.4674	43.8856	44.7708	45.2536	46.2313	46.5825	48.1317	48.6227	48.2931	49.1459	49.7689	49.9994	50.8453	52.2427	53.5155
	48.1287	50.6967	50.1793	50.3868	50.1865	50.8621	50.0221	49.9619	49.7954	51.0092	50.525	51.0706	50.9449	50.8224	50.6158	51.167	51.2975	50.8426	50.6888	51.0444	50.6761	50.8328	51.0731	50.933	51.08	50.3525	50.0115	50.8532	51.0512	51.4819	52.411	52.9299	53.1556	53.6687	54.6184	54.7683	55.9358	56.3639	57.6659	57.9387	59.554	59.9627	60.2875	61.1006	61.118	61.6566	62.1286	63.8887	65.2354
	40.0205	42.8921	42.3648	42.6962	42.541	42.6751	42.2124	42.1336	41.9087	42.3921	42.201	42.6367	42.5908	42.577	41.9438	42.146	42.0197	42.0153	42.0248	41.8141	41.4447	41.8266	41.7819	41.8002	41.7554	40.4182	40.4845	41.0349	40.9032	41.175	42.0236	42.3213	42.2009	42.9952	43.0762	43.3901	44.6897	44.52	45.6278	45.5612	46.6009	46.9137	46.7434	47.223	47.0631	47.2253	47.2145	48.4191	49.0454
	63.6219	65.9401	65.5714	65.5711	65.4451	66.1178	65.1735	65.462	65.1376	65.976	65.8886	65.8404	66.1548	66.5228	65.2403	66.0063	66.1153	66.0646	65.6212	65.4661	65.2584	65.3279	65.5609	65.293	65.7071	65.2544	64.8479	65.7886	66.2514	66.6781	68.0245	68.4317	69.118	70.4904	71.0381	71.8413	73.369	73.5041	74.9461	75.4531	76.958	77.3353	77.315	77.345	76.9852	77.7274	77.544	78.7281	79.4991
	33.2485	35.964	35.8546	35.7859	35.5689	35.8706	35.4053	35.6271	35.3753	36.1485	35.9831	36.1291	36.1795	36.2191	35.812	36.1883	36.2723	36.1071	36.2155	35.9192	35.6812	35.5771	35.8379	35.7451	35.6527	35.2689	34.977	35.2692	35.4931	35.3334	36.1093	36.4596	36.1511	36.9255	36.7034	36.8751	37.7246	37.887	38.4713	38.9558	39.828	40.3923	40.4333	40.8504	40.9047	41.6843	42.2672	43.3771	44.7592
	42.6698	44.974	45.1672	45.3311	44.8219	45.5714	44.8408	44.8341	44.2362	45.5644	45.4399	45.2933	45.7567	45.1317	44.7025	45.3913	45.6568	45.4882	45.46	45.1688	45.3651	45.1235	45.7071	45.0194	45.6938	44.8102	44.3846	44.8067	44.8789	44.9433	45.6174	46.1847	46.0658	46.7791	47.2688	47.5395	48.2778	48.6507	49.4965	49.5694	50.8543	51.5016	51.778	51.8451	51.9602	52.4531	53.5185	54.7637	56.8097
	27.8091	30.2715	29.728	29.8743	29.9379	30.0043	29.9426	30.1874	29.3388	30.067	29.6395	29.7975	29.7252	29.8801	29.2081	29.7064	29.798	29.7569	29.4411	29.2242	29.4805	29.4227	29.5158	29.7667	29.4953	28.6833	28.7352	29.6661	29.9496	30.3982	30.9741	31.5461	31.7189	32.5769	33.0103	33.6937	34.7154	35.0547	36.6869	36.6325	38.543	38.8395	38.7349	39.5323	40.0242	40.7842	40.8097	42.3446	42.9374
	63.1512	66.3878	65.2751	66.191	65.5694	66.186	65.5635	65.3516	65.0991	66.1564	66.0105	66.2187	66.0575	66.4335	65.0958	66.0199	66.2154	65.6908	65.7023	65.5402	65.3411	64.96	65.5761	65.246	65.381	64.2393	64.5707	64.9428	65.428	65.7997	66.2921	66.8996	67.3273	67.7237	68.4061	68.071	69.3767	69.3999	70.6676	70.7128	71.5565	72.4073	72.8621	72.7698	72.6338	73.0659	72.9325	74.9288	76.1739
	29.1385	31.3585	30.8859	31.3808	31.4813	31.1348	31.2698	31.0635	31.7713	31.5854	32.1852	32.1295	31.2893	31.4663	31.1438	31.0308	30.9236	30.8857	31.2384	30.7916	31.1385	31.7322	31.8797	32.0544	31.5796	30.4062	30.8224	30.9298	31.5985	32.1187	33.0606	33.5928	35.2539	36.1375	37.5493	38.9765	41.4157	43.1843	45.2525	46.1717	47.9199	49.6283	51.4643	52.518	53.7638	55.0834	56.7673	58.5221	60.0985
	25.4388	26.8894	26.7817	27.287	26.9223	26.4704	27.1122	26.8859	26.98	26.957	27.3044	27.3291	26.6245	26.4808	26.2114	26.2577	25.7869	26.1554	26.3668	26.2728	26.6902	26.1387	26.4891	26.9126	26.6188	26.3654	26.7708	27.5861	27.8068	28.156	28.5562	29.5181	31.1633	31.5213	33.1587	34.0085	36.0471	37.9887	39.521	40.3208	42.5548	43.71	44.7016	45.7417	46.6167	47.8339	48.7664	49.9049	51.458
	20.5935	22.3976	22.5633	22.4768	22.6513	22.2951	22.8851	22.7255	22.67	22.5537	23.5168	23.1272	22.5107	22.6056	22.5938	22.1642	22.4699	22.6657	22.7181	22.4903	22.8932	23.2896	23.2145	23.7186	23.2703	23.8847	24.1739	24.8837	25.4203	25.6546	26.754	27.4206	28.485	29.0408	30.0087	31.0176	32.9666	34.3437	36.2296	37.2325	39.0061	40.2982	41.4847	42.9734	44.2187	45.2302	46.8869	48.0529	50.2119
	36.5449	38.3211	37.9992	37.6259	37.0835	36.8088	37.2609	36.5794	37.5012	36.9569	37.3922	36.6526	36.111	36.331	35.6868	35.5143	35.5195	35.6911	35.3884	35.2574	35.5384	35.7791	35.7477	35.856	35.382	35.3458	35.2707	35.4975	35.9116	35.9448	36.8611	37.0979	38.4098	38.7032	39.3531	40.4714	42.2728	43.6477	44.5317	45.2347	47.4393	48.4433	49.5733	50.3477	51.3452	52.3865	53.4078	54.4109	56.2012
	22.666	24.6079	24.4186	24.4016	24.149	24.1826	24.7157	24.4359	24.6868	24.5143	24.8868	24.6716	24.2785	24.4796	24.1905	24.2184	24.227	24.6319	24.5641	24.141	24.8729	24.7675	24.7033	25.1413	24.6136	25.8939	25.7789	26.1348	26.4607	26.531	28.0936	28.0607	29.0008	28.7475	30.2288	30.6977	32.7568	34.143	34.9326	35.7392	37.2039	37.9526	39.2399	40.0569	40.8391	41.7941	42.924	43.537	45.1168
	25.757	28.3876	28.1384	28.1943	28.1934	27.6242	27.7398	27.606	27.5233	27.3994	27.7204	27.6433	27.5075	27.1932	26.8163	26.355	26.3701	26.4212	26.6585	26.5273	26.7351	26.9335	26.9635	27.1903	26.834	26.4313	26.2813	26.8519	27.1508	27.0772	27.9194	28.7644	29.2616	29.6811	30.2137	31.0227	32.8931	33.6356	34.5372	35.5429	37.2507	38.6129	39.9236	41.0562	42.3564	43.8608	45.4332	47.5399	49.3228
	18.4133	20.4926	20.2168	20.1663	20.0511	20.0148	19.9535	19.6444	20.3269	19.8637	20.2731	20.2737	19.9731	20.0125	19.507	19.6522	19.4195	19.5679	19.7562	19.2938	19.732	19.9538	20.0185	20.0678	19.9921	20.1952	20.0956	20.2983	20.6677	21.201	22.0318	22.0633	22.7566	23.1031	24.2394	24.7364	26.5081	27.7203	28.8509	29.9349	31.6228	33.4209	34.8243	36.0876	37.3838	38.6062	40.2883	41.5294	43.4902
	23.954	26.0043	26.0858	25.9551	25.848	25.8034	26.2174	26.1003	26.1993	25.9478	26.6011	25.8502	25.9632	26.016	25.5488	25.5501	25.44	26.0796	25.6556	25.9031	26.0722	26.0924	25.9841	26.2391	25.7803	26.001	25.8412	26.3549	26.6476	26.7629	27.4731	28.1561	28.9114	29.2344	30.2496	30.8762	32.8258	34.1738	35.0566	36.0789	37.7144	38.7829	40.4151	41.436	42.4425	43.7514	45.3143	46.825	48.4661
	22.2543	23.8037	23.994	23.7066	23.6407	23.4669	24.0709	23.9223	23.5989	23.3594	23.619	23.6318	22.9859	23.0957	22.4358	22.2609	22.3313	22.161	22.118	22.2542	22.2862	22.5369	22.3066	22.5868	22.3665	21.2987	21.5553	21.8881	22.1342	21.7776	23.0767	22.781	23.5289	23.5282	24.7963	25.528	27.1581	27.6171	28.9915	29.8087	31.1273	32.0915	33.4471	34.7018	36.2095	37.536	39.2992	41.3883	42.806
	22.0373	23.8818	24.0544	24.1032	23.9662	23.7377	24.1038	23.956	24.5357	24.1958	24.5482	24.3209	23.6604	23.7366	23.4708	23.2725	23.279	23.3239	23.4359	23.0291	23.3015	23.6593	23.7319	23.6788	23.4773	23.1932	23.2376	23.2531	23.7169	23.9298	24.8361	24.724	25.4957	25.5128	26.4228	26.8763	28.2433	29.177	29.8897	30.8871	31.7817	32.915	33.5901	34.8335	35.5322	36.5419	37.9117	39.3633	40.8787
	25.7308	27.8539	27.9245	27.8312	27.6629	27.5865	28.1123	27.8143	28.1296	27.6366	28.2245	27.9657	27.674	27.9777	27.1318	27.3293	27.6226	27.4727	27.4835	27.7552	27.9251	27.934	28.0627	28.1585	27.9511	29.8515	29.412	29.7482	30.3688	30.4536	30.9584	31.2373	31.8033	32.0158	32.9401	33.4501	34.7902	35.8657	36.9575	37.5055	38.9683	40.1854	40.9788	42.1638	43.1445	43.9151	45.604	46.5359	47.8418
	28.7722	30.6978	30.3829	30.2655	30.0365	30.1441	30.146	29.8662	30.2075	30.1154	30.3289	29.8296	29.2009	29.5271	28.6448	28.657	29.0549	28.9812	28.8744	28.8606	28.8366	28.8275	29.0971	29.4201	28.7186	26.9805	27.3962	27.3201	27.2771	27.546	27.9739	28.1524	28.5633	28.4393	29.5794	30.139	31.3322	31.8081	33.3583	33.6298	34.5256	35.7686	36.7289	37.7808	38.3512	39.6031	40.7013	42.3666	43.6449
	9.64594	11.2738	11.3977	11.3221	11.4265	11.1801	11.4279	11.601	11.8942	11.881	12.2532	11.974	11.8302	11.8239	11.806	11.7774	11.7821	12.0638	11.8674	12.0838	12.3689	12.5792	12.6974	13.0276	13.0377	12.942	13.2243	13.3915	13.354	13.7026	14.4175	14.1959	14.7565	14.7041	15.3865	15.2931	16.5424	17.0982	17.9261	18.4685	19.0437	20.0388	20.7423	21.4873	22.2791	23.0913	24.1683	25.4995	26.9359
	16.8552	19.1209	19.0965	19.1797	18.7029	18.6097	18.8193	18.7992	19.1366	18.7217	19.3281	18.7094	18.5239	18.7806	18.1888	18.5678	18.1891	18.4539	18.21	18.5129	18.2757	18.8954	18.8057	18.9562	18.6896	18.2565	18.3614	18.4509	18.4724	18.4972	18.7873	18.9004	19.295	18.9967	19.5172	19.2894	20.5301	20.8864	21.0758	21.5098	21.7502	22.5141	22.1919	22.4969	22.7397	22.9007	23.4002	24.1361	24.6744
	28.1667	30.1311	30.1275	30.0597	29.6914	29.5622	29.7043	29.6508	29.6909	29.3481	29.7693	29.3553	28.8716	29.0193	28.5337	28.4917	28.2792	28.1823	28.1094	28.0613	28.083	28.43	28.324	28.3115	27.8439	27.9898	28.0651	28.301	28.3374	28.2269	28.6842	28.3946	28.9664	28.5888	28.7973	29.054	30.0755	30.3493	30.543	30.9215	31.3744	31.6413	31.7935	32.0675	32.0335	32.3136	32.67	33.1459	33.693
	26.0081	28.1286	28.0725	28.0588	27.9942	27.399	27.9471	27.6824	27.9439	27.5341	27.9491	27.2409	26.9525	26.7515	26.5723	26.7696	26.4621	26.4747	26.4394	26.4052	26.4503	26.9229	26.6305	26.7216	26.4525	25.9861	26.02	26.4285	26.4098	26.498	27.584	27.9094	28.3386	28.6894	29.7202	30.4199	32.0873	33.1296	34.0176	34.6675	35.537	36.4582	37.2794	38.07	38.6349	39.1713	39.8722	40.6083	41.7392
	19.0545	21.7308	21.4035	21.7009	20.8976	21.0071	21.525	21.2223	21.3694	20.9773	21.5074	21.1805	20.9855	21.0547	20.512	20.4759	20.3855	20.4735	20.6882	20.5136	20.5797	20.7224	20.6685	20.7965	20.2757	20.537	20.8055	20.84	21.169	21.134	21.6157	22.0102	22.4641	22.0652	22.9396	23.1959	24.472	25.1023	25.6415	25.3017	26.1642	26.4864	26.9796	27.1295	27.5522	27.6968	28.3978	28.6942	29.3992
	42.4311	44.7178	44.8817	45.0551	45.1714	44.8963	45.1924	44.7571	45.8281	45.1025	45.8889	45.6385	44.9353	45.38	44.4644	44.999	44.6663	44.6183	44.7123	44.5164	44.8989	45.2263	45.1629	45.3919	45.0575	45.6393	46.1597	46.2779	46.8515	47.0782	48.1413	48.5144	49.0465	49.0261	50.5453	51.4625	53.2422	54.7366	55.945	56.7273	57.7245	59.6958	60.6258	61.653	62.9756	63.8792	65.1849	67.0212	67.8914
	20.3834	22.7432	22.5391	22.6165	22.1873	22.297	22.4857	22.5292	22.1675	22.2098	22.7573	22.2764	21.8482	21.5685	21.4504	21.8556	21.2969	21.5311	21.1845	21.3112	21.576	21.5353	21.6196	21.7469	21.6765	21.4948	21.6579	22.1705	22.4056	22.5232	22.9075	23.1516	23.4652	23.3949	23.9971	24.5058	25.7882	26.2964	26.8101	27.2402	28.3206	28.5374	29.3374	29.4817	30.1355	30.5462	31.5776	32.2363	33.4484
	19.5762	21.9745	21.4231	21.558	21.0304	21.248	21.3845	21.3268	20.8344	21.0038	21.5065	21.3205	20.8926	20.6702	20.5491	20.7446	20.1535	20.7221	20.1305	20.3853	20.4965	20.6011	20.734	20.7364	20.6637	20.1428	20.256	20.6613	20.8437	21.4138	22.0891	21.7978	22.5351	22.653	23.2381	23.8253	25.0164	25.5433	26.2526	27.232	28.2053	28.7741	29.8178	30.6218	31.3549	32.0526	32.6594	33.6224	35.1891
	25.4737	27.4461	27.5575	27.3248	26.5712	27.1804	27.4386	27.5124	27.8745	27.7859	27.5314	27.5007	27.2441	27.4191	27.2801	27.2221	27.2812	27.7514	27.6219	27.8024	27.9429	27.8082	27.9746	28.7334	28.4001	28.9893	29.0091	29.5662	29.4995	29.6173	30.704	30.9307	31.3127	31.7405	32.6124	34.1005	35.6043	36.5496	37.6623	37.9369	39.8051	40.8859	41.7224	43.3248	44.294	45.0283	47.018	48.594	50.0997
	24.552	26.9115	27.0069	26.9612	26.5498	26.4727	27.1342	26.9552	27.1329	26.872	27.4887	26.946	26.7872	26.727	26.4684	26.7081	26.345	26.3837	26.1476	26.2332	26.1705	26.6934	26.4791	26.4713	26.1823	27.2501	27.5102	27.7646	28.5204	28.5582	29.6677	30.2182	31.354	31.7071	32.8452	33.8325	35.8432	37.0356	38.6035	39.7713	42.0051	43.4812	45.1345	46.7632	48.2232	49.9858	51.6402	54.1608	56.4802
	13.0765	15.4505	15.3674	15.1204	14.7662	14.5427	14.9507	14.9492	14.9811	14.6565	15.1822	14.9067	14.521	14.7187	14.4689	14.416	14.2354	14.3862	14.1859	14.1059	14.2386	14.3608	14.3406	14.3512	14.2956	14.7883	14.5127	14.7928	15.0741	15.3681	15.8308	16.2725	16.8016	16.7361	17.3906	18.0282	19.1943	19.823	20.8114	21.3918	22.5662	23.0827	23.7902	24.5878	24.8268	25.8492	26.7534	27.8464	29.1413
	14.3702	16.9789	16.638	16.8672	16.3327	15.976	16.6605	16.5542	16.927	16.6786	16.9065	16.7828	16.4674	16.44	16.6565	16.2106	16.245	16.3147	16.0039	15.7602	16.2481	16.1606	16.0334	16.1845	16.0215	15.889	16.1868	16.5469	16.6423	16.9691	17.5887	17.5916	18.1187	18.2022	19.5657	19.747	21.0029	21.9308	22.9228	23.7121	24.5058	25.4423	26.2016	26.9346	27.5046	28.281	29.7708	30.4573	32.0416
	20.3605	21.8577	22.0846	21.8398	21.6156	21.5516	21.8112	21.6161	21.9144	21.5374	21.9533	21.5927	21.172	21.4809	21.0775	20.7076	20.8406	21.0581	21.0115	21.031	20.7431	20.8037	20.7852	20.7417	20.4136	20.3655	20.4497	20.3824	20.6534	20.674	20.95	20.7372	20.8815	21.0687	21.4621	21.3775	22.6552	22.8982	23.1722	23.2514	23.9989	24.4143	24.835	24.7846	25.3017	25.7617	26.0542	26.8734	27.5631
	22.6936	24.3116	24.2089	24.0304	23.979	23.891	23.8944	23.9334	23.7551	23.7871	23.8853	24.0429	23.8203	23.7714	23.5083	23.3968	23.5293	23.4995	23.7785	23.4271	23.7782	23.8305	23.9235	24.0283	24.0269	23.5575	23.3143	23.6215	23.9728	23.8468	24.2391	24.1278	24.2427	24.193	24.7153	24.9407	26.2274	26.6308	27.0871	27.054	27.8521	28.6777	29.049	29.6702	30.3151	31.1301	32.0807	33.2213	34.3797
	21.6257	22.9544	22.8756	23.3982	22.926	23.3408	23.7822	23.1418	23.4712	23.3535	23.9613	23.531	23.3185	23.6664	23.4636	22.9465	23.0686	23.5441	23.8858	24.0413	24.2789	24.3295	24.7779	25.2136	24.6309	25.7135	25.7895	25.9107	26.4166	26.5381	27.1075	27.5159	28.0138	28.054	29.2608	29.6427	30.3143	31.6205	32.8203	33.5354	34.4183	35.1141	35.9765	36.6608	37.8794	38.91	40.7127	41.6997	43.3326
	20.2516	22.0216	22.0912	22.0031	21.5914	21.3863	21.82	21.9454	21.8294	21.2854	21.8294	21.6519	21.3051	21.3153	21.0104	20.766	20.8316	20.8856	20.773	20.774	20.7263	20.9769	20.5358	20.704	20.6749	19.8783	19.7888	19.6619	19.9882	20.0916	20.6332	20.4921	20.5156	20.2528	20.6161	20.8314	21.6956	21.901	22.3702	22.4446	22.9467	23.2823	23.5168	23.7152	23.7636	24.4966	25.1154	25.779	26.651
	37.0388	38.962	38.8851	38.6996	38.2932	38.133	38.5439	38.1583	38.3006	38.2874	38.7575	38.2735	37.8869	37.6509	37.4827	37.6	37.0645	37.7072	37.2904	37.5035	37.7002	37.9049	38.037	37.7109	37.2177	36.6448	36.8361	36.8656	37.1066	37.0646	37.6119	37.9144	37.978	38.1466	38.4894	38.7297	40.0299	40.8599	40.9109	41.796	42.3829	43.0796	43.3846	43.564	44.2247	44.8194	46.1645	46.6065	47.8402
	17.2784	19.2937	19.2564	18.8946	18.8758	18.7882	19.032	19.0643	19.1633	18.5821	19.2492	18.8283	18.8561	18.7134	18.4612	18.2778	18.2257	18.6013	18.3351	18.1475	18.7266	18.5922	18.3765	18.5801	18.3513	17.6697	18.0639	17.9607	18.1166	18.0236	18.7817	18.7078	18.9429	18.8037	19.0665	19.2569	20.198	20.7931	21.6113	21.7538	22.3544	22.6754	22.9257	23.4505	24.0175	24.3976	25.3113	25.8388	26.9431
	28.0841	30.0871	30.3089	30.3997	30.1575	30.017	30.1919	30.2503	30.5566	29.9188	30.1767	29.97	29.5706	29.4953	29.0062	28.7219	28.982	28.9885	28.9304	29.3432	29.35	29.1142	29.3036	29.9078	28.8638	28.4451	28.4793	29.0513	29.496	29.4006	30.0625	30.2253	31.1191	30.853	31.397	32.2976	34.1291	34.8433	35.6715	36.1958	37.737	39.4835	40.0673	41.0354	42.3773	43.7451	45.0279	46.4432	48.077
	29.1599	30.921	30.9215	30.9382	30.424	30.3633	30.5637	30.4907	30.3399	30.2889	30.4166	30.1063	29.6122	29.3635	29.1009	28.9021	29.0658	28.8358	28.7977	28.6191	29.085	29.0884	28.9168	28.863	28.307	27.282	27.0378	27.1608	27.3889	27.4832	27.957	27.7799	27.9174	27.7588	28.1571	27.7957	29.345	29.5106	29.6565	29.6476	30.6328	30.7223	30.8791	30.9256	31.1389	31.493	32.0187	32.7805	33.4975
	22.6681	23.7795	23.8942	23.6625	23.2756	23.3214	23.4749	23.4219	23.3969	23.4663	23.794	23.3729	22.7995	22.8868	22.4622	22.3578	22.2947	22.2929	22.2367	22.2504	22.4427	22.5326	22.2484	22.1437	22.1503	21.3468	21.3923	21.3221	21.4617	21.3981	21.5338	21.5508	21.4108	21.2414	21.7045	21.6117	22.4995	22.697	22.8124	23.0363	23.3568	23.8742	23.906	23.8996	24.3554	24.5235	24.7697	25.637	26.503
	20.3647	21.5754	21.76	21.6788	21.6127	21.2513	21.6645	21.5466	21.1542	21.6502	21.6773	21.4093	20.641	20.8692	20.1849	20.0921	19.6214	19.8183	19.2377	19.5881	19.5441	19.5878	19.8363	18.9629	18.969	18.5066	18.8974	18.1522	18.5751	18.2957	18.772	19.0594	19.3497	19.7197	20.1858	20.5811	21.7949	22.7361	22.984	23.3029	24.4642	24.9711	25.6545	25.8987	26.8282	27.404	28.0996	29.3539	30.549
	39.3631	41.2092	41.1352	41.284	41.542	40.632	41.2718	40.9186	40.9876	41.1806	41.4785	41.4839	40.8987	40.8044	40.4206	40.1137	39.9429	40.2507	39.71	40.1085	40.1284	40.215	39.4976	39.8084	39.6959	39.7071	40.5965	40.1588	41.1174	40.8235	42.1507	41.4204	41.9306	41.8733	42.3618	42.7138	44.5713	45.1136	45.9189	46.1085	46.4762	47.5995	47.3664	47.5932	47.8436	47.6955	47.9802	48.135	49.7012
	24.3583	25.8789	25.4458	25.8126	25.3805	25.7873	26.1111	25.9129	26.1935	25.9712	25.9436	25.8959	25.4759	25.6072	25.3424	25.1845	25.0945	25.1581	25.6118	24.979	25.5452	25.4423	25.3672	25.4178	25.1483	26.3627	26.1738	25.9812	26.1656	26.1335	27.2131	27.0871	27.287	27.8176	27.9456	28.2742	29.7492	30.2771	30.6081	30.9287	31.2836	31.6895	32.6541	32.5358	32.9268	33.5629	34.1645	34.6296	35.3514
	23.9795	23.6624	21.9938	20.8291	20.3304	20.451	21.2507	20.838	22.7243	22.7182	20.7315	21.0726	19.9963	19.89	20.7289	22.887	22.1179	19.6458	19.2075	19.6159	20.3643	22.1979	23.069	22.3543	20.6238	18.9479	19.1362	22.2397	22.5979	19.3428	18.152	19.0919	21.6271	22.201	22.3402	20.2176	19.8818	19.4981	19.7471	20.9476	21.3922	23.7316	22.2033	22.0915	20.2724	19.1219	18.6531	20.3864	21.9688
	31.3084	31.7607	31.0689	29.0343	28.7477	29.543	30.3703	31.7126	33.1132	32.7674	31.1031	30.8978	30.22	30.4651	31.6347	34.9796	34.6273	31.7096	30.573	31.8567	33.2026	34.9344	35.0167	34.5482	32.9277	32.7895	32.2959	35.3991	36.1581	33.2595	32.6987	32.9917	36.3926	37.0589	37.3295	35.169	34.4298	33.4162	34.4048	37.3583	37.8939	39.2289	38.3735	38.1313	36.9132	35.7207	34.52	37.1806	38.791
	18.1879	18.3349	17.3785	15.7712	15.4046	15.8145	16.8914	17.545	19.5818	19.1085	16.4964	17.2253	16.4288	16.1736	18.8664	18.7895	19.0464	15.99	14.9917	15.9265	17.4539	18.9067	19.4383	18.0054	15.5489	14.6047	14.907	18.1507	18.5259	16.3019	15.7431	15.1943	18.6473	19.4612	18.7739	17.2521	16.7889	15.6351	15.8069	18.2725	18.4613	19.8257	19.3869	18.416	16.851	16.1906	15.2774	16.5513	17.9317
	33.2727	33.487	33.3467	31.5506	30.4157	31.4168	33.184	33.8818	35.4354	35.8904	33.2594	33.4936	32.8412	32.778	33.6129	35.7169	35.8611	33.5467	32.84	34.1518	35.2045	37.193	37.1019	35.8967	34.7234	36.2046	36.4287	38.6925	39.6969	36.9295	37.7299	37.2451	40.8869	40.6095	42.0364	39.361	40.0103	38.9427	38.8381	41.0102	41.947	44.1326	42.5693	42.6167	41.3289	40.0178	38.6628	41.0275	42.6504
	25.3961	25.7753	25.1182	23.928	23.2163	24.1501	24.947	25.8105	27.4019	26.9798	25.0378	25.5138	25.0158	23.8718	25.7268	25.3698	25.7674	23.4035	22.4395	23.3384	23.8251	25.7228	25.6155	25.2162	22.7182	21.8417	22.4337	24.9748	25.7451	24.0848	23.464	23.9126	27.5125	27.8005	28.4262	26.307	25.869	24.209	24.3011	26.6323	26.5391	28.2389	27.8234	26.4517	25.244	25.0462	23.5848	25.4112	26.5025
	17.4462	18.0693	17.3352	17.2286	16.6716	17.0751	17.9598	18.0146	20.3141	21.1046	19.921	20.0144	19.5029	18.5049	20.9713	19.9128	18.8971	16.3409	15.2543	15.4434	16.8562	18.3815	18.0876	16.5843	14.773	12.6374	12.8092	15.5226	15.4799	13.7658	12.3035	12.4067	14.3458	16.0992	15.9077	14.4572	13.8761	12.1624	12.4868	14.8214	15.2109	16.4144	16.1945	15.5012	14.0903	12.3313	11.4067	13.3827	14.8294
	13.2594	13.3076	12.5986	11.3202	10.6155	11.8048	12.4874	13.6612	15.398	14.7991	14.0339	13.1051	12.7806	12.1386	11.5277	14.1759	14.5919	12.2164	11.5966	11.7391	13.3839	15.3977	15.2943	15.0222	12.6518	13.9617	14.2776	17.4857	17.5684	15.8152	14.8126	14.6951	17.6428	17.8835	19.0609	17.1384	16.7262	15.718	15.8489	18.3315	18.3169	19.4004	18.3175	18.4152	17.1129	16.3963	14.9252	16.4581	17.2164
	21.2279	22.125	20.0611	18.7887	17.7173	18.3942	20.0642	20.6403	21.7651	21.3571	19.4314	20.2424	18.9236	18.0789	21.6265	22.1433	22.0036	19.4522	18.1255	18.9586	20.1653	20.9644	21.1396	20.7015	18.1565	17.1527	17.4926	21.7095	21.7754	19.0109	18.5821	18.2733	21.2214	21.8307	21.6976	19.4336	19.4544	18.0473	18.5568	20.865	20.3624	21.6193	20.6258	21.1567	19.0101	17.7708	16.7302	18.1276	19.6585
	29.3828	28.534	28.1422	26.3379	25.4474	26.499	28.3121	28.8613	29.6158	29.7469	27.3925	28.0032	26.8448	25.6575	25.9463	28.5918	28.7364	25.5191	25.4974	26.3448	27.701	27.7531	28.372	27.0118	24.9406	24.1276	24.4212	27.6354	27.5487	25.3946	24.4432	25.4301	27.8743	27.6925	28.8422	26.9998	25.8905	25.2406	25.3243	27.2933	28.6758	29.7878	27.6723	28.6049	26.6736	26.5582	25.4998	27.6859	28.4234
	38.2364	38.721	37.936	36.3958	35.3291	37.0025	37.4274	38.4604	40.6082	40.6756	39.2438	39.9352	39.0093	37.8816	39.6419	39.868	39.4909	36.7319	35.9296	36.4971	37.9216	40.0564	40.3634	39.9961	38.5031	38.0763	37.8768	40.2201	40.9849	38.9418	37.6457	38.6082	40.6908	41.8513	42.392	40.614	39.7956	39.0108	39.1519	41.5379	42.4322	43.1609	42.3248	42.2927	40.5602	40.0469	38.9772	41.6608	42.9629
	47.5761	46.9445	46.1833	44.7362	44.794	46.481	46.2021	47.6553	50.1161	49.0068	46.9814	47.8239	46.7908	45.8887	45.4428	48.4682	48.487	45.8853	45.3798	47.0725	48.3906	50.9094	51.2457	49.4172	47.2096	46.8945	46.5537	49.5351	50.3344	47.7236	47.0774	47.2063	50.7492	51.0073	52.2754	48.8861	49.1287	47.8452	47.8951	49.848	50.9894	53.5112	51.428	50.5178	48.6877	49.1715	48.0883	49.3425	51.2617
	31.12	30.9979	29.6347	28.5025	27.7788	28.6311	29.6137	29.9836	32.1351	31.079	29.4812	29.6694	29.1978	28.29	30.4021	31.2157	31.474	28.9945	28.3911	29.0289	30.7086	32.4145	32.6104	32.3078	30.8387	28.1417	28.6163	31.2938	32.0927	28.7472	28.8183	28.8194	31.7055	32.2293	32.5865	30.6873	30.0286	29.3619	30.1119	32.053	32.9145	33.428	32.8786	32.5631	30.7161	30.0825	28.8678	31.5504	31.3517
	12.1422	12.3937	12.4829	10.0947	8.84922	9.93453	10.459	11.2301	13.8565	13.4267	10.6103	10.5483	10.0421	9.70642	11.2527	12.3468	11.9101	9.24058	8.62447	9.23214	10.7598	12.0712	12.4596	10.0142	9.13936	9.12481	9.38762	12.041	12.1281	10.6128	8.91594	9.23665	12.3089	12.6669	12.0089	11.015	11.0064	9.94536	9.07826	11.4347	11.9232	12.8511	12.1702	12.0906	9.21266	9.22533	8.97511	10.5455	11.3925
	37.6295	37.1725	36.7786	35.0582	34.4208	35.2623	36.2374	36.3116	38.1312	38.1468	36.5191	36.0834	35.3121	35.2063	37.0123	37.0624	37.2607	33.8431	33.4787	33.3873	36.4977	37.7182	37.8382	36.851	34.3293	33.1673	34.3368	37.0786	37.3972	34.1803	34.2206	34.4502	37.1311	37.5955	37.9169	34.8202	35.4599	33.9551	33.8219	35.6503	36.4983	37.9324	37.1485	36.9502	35.1103	34.8677	34.6049	36.0312	37.2128
	9.70642	9.93133	8.98267	7.90329	7.63839	8.07795	9.19237	9.28104	11.4944	10.8518	9.34235	9.52805	8.82504	8.97083	10.6669	11.8929	11.7174	9.41992	8.83643	9.29048	10.6605	12.1941	12.0873	11.4805	10.1656	9.2711	9.57448	12.4892	12.9848	10.9412	9.70797	10.3203	12.6371	13.3266	13.486	12.1877	11.7849	11.1272	11.3711	13.2853	13.716	15.2157	13.9824	14.2082	12.4654	10.8494	10.1909	12.1736	13.1845
	32.9438	33.0197	32.458	31.0781	29.9338	31.2213	31.1308	32.6655	33.9964	33.251	31.7189	32.3957	31.4371	31.2781	32.9348	34.7743	34.278	31.3125	30.3534	31.2296	32.2643	34.7764	34.662	33.2744	31.4754	30.9746	31.7242	34.907	35.068	32.3843	31.2253	31.5231	34.9695	35.5134	35.3466	32.998	33.7223	32.7069	32.3818	34.3281	34.7533	36.2965	35.2796	34.6277	33.3895	32.4975	30.7775	32.69	34.4058
	20.9938	21.8387	20.6597	19.0193	18.3475	19.0387	19.5646	20.2309	21.3872	21.1119	19.0946	19.6003	19.0123	18.5479	19.0159	19.6833	20.0074	16.8164	16.2853	16.8923	18.5353	19.2824	19.8243	18.8137	17.1416	15.5345	15.974	18.1966	18.6428	16.6254	15.3666	15.2499	18.3365	17.9353	18.8674	17.0747	16.752	16.1518	15.7978	17.453	18.2511	19.2787	17.8709	17.543	16.4397	15.2423	13.9308	15.8089	17.2678
	31.7953	31.4965	31.1669	29.8311	28.5008	29.5207	30.2397	30.4183	32.9407	32.9497	29.5998	30.5478	30.6237	29.9681	29.6776	33.5027	33.203	29.7572	29.549	29.714	31.9135	32.397	33.1225	32.0994	31.3944	30.932	31.0984	34.3378	35.4385	32.3543	30.7986	31.4356	35.3192	35.3531	35.7388	34.7531	33.6639	33.6063	33.6402	35.4798	36.0065	38.037	37.2814	36.933	35.1617	34.3192	33.2521	35.9428	36.4621
	36.7053	37.7583	36.2999	35.6362	34.0752	35.592	36.9433	36.2898	38.2815	39.0237	36.8898	36.0186	35.9477	35.347	38.6423	40.9323	41.5926	38.8036	38.2884	38.0322	40.3231	43.038	42.3666	40.7603	38.769	37.1015	38.6296	40.8384	40.8221	38.2353	37.0857	37.4718	40.4149	41.4356	41.0307	39.153	38.3655	37.6041	37.5852	39.4255	40.423	42.4603	40.2253	40.527	38.5626	37.5808	37.4191	39.1428	39.5644
	32.9516	33.4765	32.2503	30.6873	29.7694	30.5491	31.4734	31.3195	34.2227	33.9239	31.603	30.8278	30.7115	29.4947	33.0529	34.0937	33.5736	30.4119	30.1249	30.314	32.0255	33.4742	33.8294	33.2026	31.0089	30.6198	31.1279	33.5084	34.2755	31.0525	29.959	30.9883	33.8041	34.7529	34.7613	32.7338	32.219	31.6246	31.6015	33.1042	33.8263	34.7152	34.6277	34.2194	32.3217	31.6115	30.7266	32.7218	34.1123
	18.0234	17.8799	17.1904	16.497	16.1773	16.7742	17.2544	17.6562	19.4768	18.8723	17.0886	18.2793	14.9424	15.0662	16.2049	17.9246	17.8566	16.1402	16.2685	15.8407	17.8391	18.8251	19.8809	17.9044	16.405	15.1853	16.1266	18.8509	18.8409	17.6243	17.1845	17.4676	19.3145	20.8294	20.6228	19.6185	18.3825	18.2875	18.4733	20.6598	22.056	23.6905	22.4116	21.0403	19.6198	18.906	17.5962	18.7043	20.602
	7.50679	7.84924	6.82734	5.463	3.99394	4.98306	5.85232	6.17139	7.75252	7.82494	5.97771	6.20502	5.82605	5.17726	6.40156	7.51409	7.02755	4.66154	3.65719	3.9203	5.6092	6.82383	7.33881	6.00465	4.35531	6.49638	6.10273	8.92388	9.21171	6.82228	6.11336	6.21887	8.59618	9.42465	9.55042	7.56834	7.51109	6.54646	6.05168	7.88532	8.70996	10.5076	9.37201	10.2425	9.17668	7.87938	7.58655	9.57254	10.2698
	27.7876	27.8798	27.1303	24.8508	24.3831	25.2561	26.3696	26.0241	27.8582	28.2532	25.6738	26.9023	25.359	24.6167	27.1172	28.2841	27.7972	25.5165	23.9396	24.5418	27.2867	28.1641	28.4482	26.8306	25.0059	23.3962	24.0786	26.3322	26.3319	24.1466	22.6925	22.977	26.2997	27.4427	27.7049	24.5824	24.95	23.2347	23.5214	25.8751	25.1393	26.8706	26.3589	26.9168	24.77	23.2396	22.2118	24.8489	25.6052
	17.9936	19.2751	20.6525	20.8344	21.1576	21.5558	20.4232	21.553	21.8823	22.5573	22.605	21.4982	19.8941	20.4731	20.2983	20.7924	20.2213	20.8596	21.313	22.1556	22.6155	21.1252	20.8313	21.1806	20.6134	22.742	24.2288	25.8652	28.2996	29.0704	30.845	32.7857	34.6877	37.5676	40.4946	43.0933	45.498	46.5884	47.0932	49.3819	51.6421	53.0156	55.5859	57.0214	58.094	59.9757	63.4493	64.5899	65.8776
	14.3027	14.9036	16.6052	16.6276	16.7169	17.0166	16.0602	16.609	18.1084	18.1529	18.9148	17.0457	15.8403	16.8051	15.8555	17.2741	16.1209	16.9719	17.3912	18.098	18.5304	17.0742	17.0663	17.0095	17.1248	18.9159	19.6535	21.5194	23.5283	23.778	25.4015	27.3927	29.5153	31.8762	34.1271	36.4192	38.4843	38.7447	39.6334	41.2878	43.9265	45.438	46.6145	49.1136	49.8079	52.4388	54.9694	56.637	58.153
	30.4866	31.4593	33.6304	32.8594	33.4197	33.2712	31.6773	32.554	33.62	33.7919	34.5201	33.1259	32.0789	31.6017	31.8322	32.112	31.4501	32.3194	33.1372	33.6721	33.172	33.0287	32.6222	32.3901	32.4805	35.3722	36.7706	38.7681	41.0938	41.6689	43.2576	45.1592	46.7351	49.0737	51.6732	54.1285	55.6231	56.2638	56.8813	58.0935	60.0059	61.5945	63.1924	64.1573	65.4858	67.0526	69.5382	70.922	71.043
	20.1608	21.4765	23.9338	23.5881	23.622	23.6551	23.2592	22.9567	24.7888	24.911	25.5226	23.796	23.1563	23.1175	22.6604	23.3739	22.726	23.6218	23.9915	24.5551	25.0656	24.0052	23.5618	23.932	23.5398	25.9151	27.1811	29.1681	31.0937	31.1606	33.2293	35.5758	37.8123	40.6701	43.9999	47.152	49.9212	50.7389	51.3597	53.7566	56.5931	58.0626	60.9356	63.8002	65.5147	68.4671	70.9728	74.0375	75.6874
	73.5639	75.3737	76.4524	77.3431	76.741	75.9979	75.8933	76.3894	77.6057	78.2998	79.5134	76.3179	76.1714	75.0119	75.3431	77.0021	76.1427	77.2616	78.3054	78.2384	79.3185	77.1111	77.1408	76.7454	76.9861	79.5586	82.2318	83.5104	86.4467	87.7417	91.7462	94.7567	98.9585	104.801	107.625	112.656	117.095	118.381	122.431	125.046	129.006	132.991	136.935	138.664	142.137	145.142	148.491	153.008	154.305
	23.8407	25.5837	27.7592	27.0794	26.9803	26.9133	26.5104	27.3054	28.1803	28.657	29.3768	27.5059	27.0149	26.6676	26.6271	26.8451	26.3895	27.0853	27.8079	28.3956	28.6088	27.2548	27.1887	26.9303	26.9411	28.831	30.5892	32.3462	34.3049	34.8884	36.6706	39.203	41.2536	44.4205	46.8891	50.2704	52.6425	54.1704	55.2256	57.1784	58.9342	61.6949	64.3414	66.0557	68.213	70.5483	73.774	76.1072	77.3915
	31.7041	33.8812	35.5607	35.2158	34.8958	35.1462	33.6709	34.7592	36.3758	37.1561	37.2898	35.8919	35.0112	34.6519	34.2645	34.9686	35.3074	35.6078	36.6452	36.7575	37.3307	35.9664	35.7555	36.0596	35.4907	36.961	39.6308	40.9778	42.928	43.9727	46.2336	49.193	50.6954	55.1037	58.3912	61.0837	64.1016	66.72	68.5098	72.4152	75.0762	77.6672	80.1662	82.93	85.4911	88.7184	92.2974	94.1921	95.7392
	17.1648	17.7337	19.5959	19.5422	19.8152	19.8251	18.5554	19.4657	21.0533	21.6942	21.7033	20.2408	18.6668	19.3689	18.9007	19.557	18.8434	19.5676	19.8734	21.4176	21.6714	20.3657	20.0467	20.2547	19.9647	21.9387	23.6801	24.5477	26.5419	27.483	29.0342	31.8593	33.1728	36.4229	39.4258	41.4834	44.676	45.4039	46.0017	47.8453	49.537	51.3118	53.2221	54.8287	56.6359	58.7894	60.8051	62.9711	63.6331
	39.5353	40.2274	42.7114	41.851	42.4009	42.1959	40.5253	41.8826	43.317	43.7128	44.3254	42.5298	41.2705	41.8847	42.0927	42.2385	41.4051	42.5439	43.1296	43.4229	44.3433	42.3408	42.9868	42.311	41.8485	44.827	47.4516	48.9726	51.9215	52.7181	55	57.1694	59.4989	63.0523	65.3032	68.8992	71.4101	71.6841	71.8746	73.1042	75.6056	77.6696	78.6269	79.6376	80.4078	81.9583	85.1601	85.1743	86.625
	82.4155	83.237	84.9599	84.7003	84.8853	84.8522	84.7366	84.9461	86.8827	87.347	88.176	86.1188	84.7835	84.8845	84.5705	86.1305	84.6442	85.697	86.4832	87.9417	88.6674	86.9795	87.2617	88.3143	87.9019	89.8752	93.1053	96.0537	99.2323	101.777	104.253	108.338	111.257	115.162	118.373	122.94	125.606	125.812	125.703	127.612	130.928	131.94	132.493	133.468	134.735	136.004	138.468	139.376	139.044
	22.3353	22.9352	24.1423	24.28	24.6363	24.5205	23.2759	24.3087	25.1418	25.4493	25.9995	23.8019	22.4893	23.0618	22.5772	23.321	22.2876	23.5619	23.7011	24.2011	24.9422	23.714	23.1016	23.268	22.7394	24.836	26.995	29.0903	32.4338	33.4147	36.4706	39.1194	41.9835	45.6994	48.5726	52.1002	55.3037	55.7555	57.9617	60.433	62.9136	64.8939	66.5681	69.1853	70.7487	73.2133	75.9589	79.4372	79.7969
	26.1785	26.9945	29.0384	28.8411	29.088	29.1597	28.0479	28.7101	29.8317	30.6185	30.7511	29.5061	28.175	29.1807	28.2685	29.3485	28.4483	29.3842	29.897	30.4702	31.2363	30.1936	30.1391	29.9296	29.3885	31.8358	33.1555	34.3807	36.0667	36.2952	38.0037	39.6956	41.7049	43.9155	46.1772	49.1183	51.2615	51.6491	52.6685	54.2331	56.1099	57.9046	59.72	61.5316	61.9961	64.1665	66.207	68.2607	69.0284
	27.5763	28.5504	29.8672	29.7757	29.8954	29.9236	29.2237	29.9606	31.2279	31.4217	32.0273	30.5538	28.6321	29.644	29.2605	29.948	29.467	30.4432	30.878	31.6206	32.1908	30.8032	30.8174	31.0938	30.6015	33.3917	35.5536	37.5287	40.5273	41.9335	43.5818	46.502	48.8901	52.0148	54.6348	57.9281	60.5577	61.7216	62.4443	64.1431	65.7155	67.8932	69.8	72.1227	73.6455	75.5336	77.973	79.7167	80.3105
	53.6911	54.3866	55.7066	55.5241	55.8183	55.8505	54.6753	55.8001	56.0694	57.0123	57.4056	56.0759	53.8648	54.6772	53.3826	54.9013	53.3082	55.1058	55.4084	56.1276	55.2951	54.1117	54.7018	55.2271	54.7013	57.7325	61.5317	64.1323	67.9725	69.4219	71.7327	74.3027	77.028	80.103	82.8227	86.2974	90.0042	89.5477	91.4287	93.4707	96.6343	98.9637	100.196	101.657	103.579	105.627	108.972	110.661	110.661
	55.2305	56.002	57.3202	57.5016	57.863	57.7539	56.9371	57.4303	58.1272	59.0654	58.9886	57.5646	56.2944	56.8145	56.4788	57.2408	55.2767	56.8951	57.1805	57.7048	59.1504	56.9397	57.4604	57.0038	56.6752	50.5637	52.5582	55.4228	58.2691	61.0878	64.1731	69.1429	72.9187	78.6076	84.6471	90.0671	95.7621	98.6703	103.119	106.733	112.179	116.87	120.847	125.022	127.23	132.767	137.69	141.167	142.9
	24.8282	24.908	27.2348	27.1648	26.7975	26.6974	25.8115	26.7643	28.5473	28.2539	28.8741	26.9934	26.0861	26.0812	25.9022	26.2988	25.8004	26.8022	26.7645	27.1696	27.897	26.7059	26.1631	26.0902	26.5835	28.8184	30.5811	32.9081	34.8129	35.7387	38.2388	40.8508	42.5766	46.3296	49.8158	52.4877	55.0782	56.8551	57.4992	59.7671	62.366	65.1408	68.0073	70.0879	71.457	74.4186	78.4004	80.2997	81.1968
	39.4577	39.3481	40.761	40.5892	40.4728	40.4575	39.756	39.8714	41.1323	41.6171	41.6334	39.8153	38.2917	38.8743	38.6999	39.1471	38.2902	39.2985	39.7821	40.4579	40.5438	39.5485	39.3629	39.0832	39.082	37.2929	38.4061	40.4318	42.4486	42.9613	44.9003	46.5321	49.36	51.8769	55.1099	58.1662	61.2629	61.7126	62.8548	65.374	67.9507	70.4578	72.222	75.2144	75.8469	78.6087	81.3493	84.7549	85.0833
	27.7072	29.0554	30.883	30.6897	31.2541	30.938	30.6872	30.7938	32.5351	33.0822	33.036	31.6624	30.4239	30.828	30.304	31.2002	30.5518	31.5047	32.1466	33.144	33.4033	32.0235	31.993	32.0545	31.818	30.4742	32.0678	33.3837	35.1949	35.4943	37.1355	39.1836	41.3014	43.9167	46.6495	50.1347	52.8461	53.2539	55.2379	57.1007	60.1199	62.3667	64.1209	66.1247	67.6963	70.2115	74.6096	76.6233	77.9182
	30.6876	31.5174	33.9353	33.5	33.9489	34.0193	33.0156	33.624	35.1696	36.185	36.09	34.2607	33.345	33.6563	33.5746	33.9083	33.0242	34.7045	34.6831	35.8238	36.3413	35.3672	34.6182	34.9726	34.8003	36.3424	37.0306	38.159	39.8195	39.9171	41.4033	43.8581	45.8675	48.5927	51.657	55.1651	57.675	58.343	59.6543	62.2274	64.9075	68.0526	69.9885	73.3858	74.6993	77.2599	81.2294	83.4986	84.2177
	27.3745	28.5765	30.7191	30.1341	30.627	30.9014	30.0506	31.0463	32.129	32.3233	32.5329	31.3485	29.6353	30.2859	29.9793	30.3198	29.6439	30.4215	30.7375	31.8117	32.4631	30.9751	31.254	30.8598	30.8587	32.0409	33.2994	34.3024	36.2255	35.8788	37.9942	40.059	41.9145	44.1331	46.8402	50.124	53.0399	54.187	55.0454	57.7196	60.2493	63.0871	65.5115	68.3277	70.0384	72.6677	76.0974	77.9961	79.553
	29.4811	31.1422	33.1548	33.366	32.9646	33.0315	32.8286	33.4019	34.5046	35.3981	35.6633	34.392	33.1146	33.4671	33.2373	34.0574	33.9515	33.9873	35.0008	35.5662	35.697	34.3572	34.3637	34.4809	34.3436	34.9751	35.4781	37.0515	37.8669	38.1238	39.3924	41.2762	42.5226	44.4261	47.4365	49.0567	51.2047	52.1199	52.7574	55.0459	57.3026	59.4133	61.6874	63.7708	65.7918	68.0148	71.201	73.6347	74.999
	24.4425	25.7451	28.2136	27.4625	27.7416	28.4478	27.509	27.9863	29.6575	30.3112	30.5286	29.1509	28.2299	28.6777	28.2811	29.1186	28.3425	29.2118	29.4861	30.137	31.1486	29.9319	29.2998	29.0753	29.5247	29.9806	30.7047	31.1643	32.8873	32.552	33.9024	35.6377	36.2487	39.2057	41.4389	43.2293	46.1474	46.1476	46.6296	48.8647	50.8428	54.1502	55.5828	58.1551	59.8719	62.653	65.5433	68.049	69.3715
	50.5612	45.7278	46.359	45.9955	43.9128	44.3086	45.4667	45.0349	44.5721	42.4277	43.4874	43.3513	43.5282	44.7593	45.2624	44.4621	45.1966	43.3276	42.628	43.1839	42.5768	43.0237	43.3079	45.2266	45.4021	42.5648	45.9929	48.1358	53.0186	54.9113	58.9926	61.1058	64.6309	67.7699	69.6027	73.7838	75.416	79.3131	83.808	88.8849	90.2668	93.0962	93.9709	96.329	98.1691	99.9153	103.209	106.887	109.764
	47.3359	41.7438	41.9241	40.0789	38.3209	39.8181	41.9666	41.4421	40.6358	39.0303	41.3983	40.5431	40.9555	42.3587	41.4893	42.1193	40.0351	41.6499	38.0587	39.0215	38.9319	38.4416	38.324	39.7838	40.4897	38.6662	40.5075	42.5245	45.5964	48.6197	50.9094	53.2971	55.6382	57.194	59.2055	64.2162	65.1607	69.2581	73.849	79.4198	81.5223	84.668	85.9994	87.6379	88.3612	92.5488	97.6204	101.002	104.096
	71.1391	65.7308	66.0303	64.5342	57.1399	53.7471	53.5755	53.5881	52.3738	51.6777	52.2988	52.3629	53.6234	53.4811	53.1364	53.205	53.7186	52.7763	51.0143	50.7947	51.4525	51.0577	53.0739	53.8851	54.6774	50.3184	51.8725	55.3407	57.6389	60.0004	62.3959	64.1669	66.0906	68.8174	70.2339	73.9828	75.7222	79.1425	83.198	86.8721	90.5678	91.8764	93.2375	93.8143	95.467	98.6105	101.451	105.267	107.466
	54.3813	48.0907	48.4578	47.2126	49.3718	54.823	54.1728	53.0317	53.3853	52.7124	53.1031	51.5791	52.1897	51.8316	53.0186	52.211	54.2419	52.5936	50.1457	49.6873	49.9762	50.0794	50.0606	52.4244	52.4553	49.3165	52.2579	55.2565	57.42	60.4388	62.641	64.9803	65.6687	67.4138	69.2323	70.4306	73.6294	76.7393	80.1398	83.9134	85.1238	87.4763	87.0815	87.0518	88.896	90.8322	93.4834	96.3227	96.8965
	50.7096	45.3973	46.0164	44.8519	45.5776	44.6087	44.5145	42.4188	43.1162	41.9741	42.4139	42.4842	42.8228	43.6529	43.3473	44.008	42.3198	43.0259	40.4398	40.399	39.4817	40.2101	41.9569	42.2647	42.7906	42.076	44.793	47.9971	50.3713	53.4233	57.1167	58.3902	59.3968	62.3445	63.6379	66.3654	68.644	71.5885	74.4539	78.3282	80.3943	82.3468	83.8917	82.8207	85.2202	87.4824	90.7378	93.571	95.6486
	61.8018	56.4859	57.3764	56.1811	55.0739	57.6525	57.9663	56.9771	56.4126	55.5599	55.9771	55.7734	56.6052	57.8653	58.4854	58.6847	58.497	58.7045	55.5079	56.3322	54.9698	55.3575	57.8575	58.6848	59.472	57.2754	60.7114	64.1829	68.0023	72.8142	76.3489	79.3877	82.8544	84.2241	87.2999	91.1944	92.7199	98.0074	102.844	110.008	112.959	116.7	116.03	118.153	121.399	124.745	127.626	132.219	132.513
	44.6792	39.7094	39.9259	38.9504	36.829	37.7497	38.3219	36.8687	36.716	34.8136	35.7559	35.4882	36.3994	36.8899	37.2196	36.2137	36.5836	36.2608	35.1183	34.3003	34.0395	33.6011	35.1523	36.1156	36.628	35.2087	37.2747	40.3974	43.9643	46.764	49.2657	52.6709	54.376	55.7349	57.6273	62.2924	65.0936	66.5954	71.354	75.422	77.9639	78.9358	79.9439	80.2346	82.4777	83.0649	88.1369	89.9646	90.873
	54.8602	49.517	50.1492	49.1783	47.6532	50.5691	50.4009	51.0686	48.9141	49.4455	49.4932	49.1745	49.8531	50.5869	50.2678	49.5829	49.6153	49.6251	46.4303	46.7343	47.5706	46.6539	48.2235	48.6841	49.8684	46.8703	50.9285	54.9571	57.0519	60.5075	62.0992	63.2247	65.2927	67.6322	67.6378	71.8858	72.2726	74.2826	79.0945	84.3077	85.0497	85.5594	85.648	86.4319	88.0762	89.7403	92.4461	93.9544	95.5045
	35.4282	31.0001	31.6001	30.3691	32.9344	33.4637	34.113	33.1639	33.1943	32.1301	32.8142	32.9296	33.5887	34.9443	34.3194	34.4178	33.347	33.4672	31.3983	30.9564	30.6999	31.3009	32.5626	33.418	34.9234	32.6332	33.5335	36.5782	38.2185	40.3819	42.6033	44.1426	45.5455	48.0315	49.7573	53.3277	55.5553	59.6245	63.9696	69.5749	74.1726	75.8221	76.9305	78.6287	81.6816	85.3929	90.0828	93.9579	95.9152
	47.6447	43.1917	43.1002	42.8729	41.845	40.9283	40.3637	40.7403	40.6104	38.8598	40.8121	40.8835	41.6019	41.3912	42.3864	42.107	40.661	40.4593	38.7865	37.7935	37.8281	37.791	39.2273	39.9461	40.6345	38.4598	40.5385	43.437	45.1117	47.755	48.9952	52.0774	53.8351	55.1028	55.9154	59.9532	61.2358	64.9393	69.6979	74.4302	77.31	78.9893	78.7727	79.9989	82.4401	84.9837	88.3634	92.2251	94.8909
	39.6728	35.2237	34.9513	34.8367	31.4021	33.6484	33.653	32.3828	33.1892	32.2761	33.1868	33.5586	34.1835	34.5221	33.8709	34.558	34.6228	34.3724	31.7566	32.2787	31.6401	32.5154	34.0464	34.9266	36.3179	34.0425	36.092	38.2921	39.4953	41.9917	43.8324	45.3888	47.1703	49.2141	50.8977	53.2557	55.1103	59.4998	62.7636	67.48	70.4958	72.4825	72.8636	73.6112	76.5598	79.6939	84.1486	86.883	89.2239
	71.2374	65.5564	65.8915	65.2067	63.8075	63.4103	64.9063	63.6595	62.86	62.3643	62.1839	62.4524	63.4013	63.7719	63.1649	63.5445	63.3244	62.524	61.0848	60.4489	60.9096	60.3828	61.3917	62.4982	62.8915	60.6608	63.1558	64.7419	67.2039	69.5404	72.312	72.745	75.1498	76.1175	76.278	80.2029	81.9104	85.0008	89.1878	93.7001	95.6903	96.6775	96.7448	96.999	99.908	101.634	105.384	109.401	110.559
	38.6146	34.9517	35.4267	33.7236	33.7269	38.3486	39.2199	38.53	37.662	35.7185	37.2975	36.2191	36.8552	38.1854	38.2999	36.344	35.6515	35.5649	35.3253	35.4519	33.5936	33.5646	35.094	36.3393	37.5423	35.0207	36.0621	38.2757	42.578	44.0325	46.3629	48.1676	48.8777	52.0762	53.5346	57.3637	59.0545	63.3203	67.8684	73.14	77.05	79.0789	79.2144	82.8561	84.3265	87.5994	91.34	94.672	98.48
	57.8657	53.2222	54.3656	53.1829	47.285	48.5866	47.165	47.6783	47.7666	47.0942	47.3496	46.4442	48.1985	47.4406	48.4347	48.659	49.0491	48.6503	46.984	46.5412	46.1432	46.4951	48.6064	48.3929	47.9669	45.6938	48.0229	50.6303	53.1211	55.6266	57.7184	59.4132	62.7616	64.788	67.51	71.3758	74.571	80.4548	85.5228	95.362	98.988	104.873	108.92	111.388	116.691	123.25	126.487	133.796	136.567
	71.3367	66.5924	67.7054	66.7952	73.2735	73.9082	74.3118	73.3212	72.0308	71.7303	71.301	72.445	71.959	72.6036	73.5535	73.1175	72.2204	72.2473	69.5185	69.6833	70.2067	70.2942	72.7746	73.8908	74.7111	70.4756	74.7314	77.2325	80.1188	80.8113	84.7726	87.9465	92.1577	95.01	97.463	103.303	107.238	113.247	120.446	128.67	132.728	138.237	141.025	144.173	149.024	154.884	161.004	167.579	172.274
	68.8297	63.6885	64.8397	63.2108	59.335	60.7584	60.224	59.7896	58.5951	57.8452	57.9982	58.1873	59.8032	58.8362	60.1426	59.4453	59.1333	59.2412	57.3978	56.5843	56.7706	56.6481	58.6862	59.3739	59.765	57.0874	59.3109	62.3035	64.4719	66.9867	70.2663	72.3917	74.6406	77.7001	79.8953	83.9676	86.9253	92.7131	98.7186	105.478	110.344	113.879	117.513	121.552	126.209	132.813	140.026	149.914	155.252
	35.8173	31.3035	32.1596	30.8737	26.9283	27.4549	27.8792	27.7726	26.8434	25.7567	25.9104	26.8765	27.0587	27.8339	27.6174	27.63	27.1428	26.1358	24.1973	23.8386	23.8075	23.0742	24.9727	26.3971	26.9818	24.9941	26.592	27.8922	29.937	32.5544	35.2166	36.4249	38.4883	39.2736	40.7475	42.8389	45.0135	47.6793	52.4303	56.2509	58.4811	61.1207	61.7042	63.382	65.073	69.521	72.6434	77.735	79.0572
	52.2771	48.0283	48.124	46.4892	37.702	38.5455	38.4437	37.9022	37.2061	36.2027	37.8512	36.0784	38.5702	38.8267	39.1854	38.6856	39.2879	38.7974	36.6458	36.9988	35.9775	36.6396	38.0196	40.0492	40.1035	37.7424	39.506	41.7523	42.935	45.6163	47.4938	48.7219	50.5452	51.297	52.5719	54.7735	57.3609	59.4821	65.2816	67.9215	71.8333	74.8862	74.2874	75.5252	77.5865	81.3809	84.6073	87.5248	90.889
	56.4495	51.43	51.7788	51.2082	47.3074	46.0562	46.975	45.9756	46.23	44.5392	44.4358	45.2945	45.2442	46.1848	47.7032	46.7697	46.4484	45.0964	44.4463	43.4379	43.3993	44.0288	44.6231	46.1049	46.057	42.2761	44.8474	46.3733	47.3991	48.7212	49.3627	49.5415	50.9816	50.5677	51.754	52.4818	53.4269	56.7728	59.5501	62.6877	64.0777	66.1607	66.2986	65.5444	67.2779	70.5405	72.9918	76.7023	80.0992
	21.2414	17.2893	17.4888	16.657	13.4466	14.3705	14.9111	13.765	13.0976	12.7247	13.0568	13.3876	14.1962	13.7891	14.0799	14.7193	14.3754	13.3121	12.3021	12.7959	12.3106	12.3302	13.5335	15.4044	15.8089	13.0771	14.4717	15.4184	17.1375	18.1708	19.4927	19.8199	21.145	21.3983	21.0539	23.214	23.947	26.786	29.2381	32.4277	33.6608	35.2932	34.8823	34.7168	36.8518	39.6287	41.4867	44.432	45.8415
	29.2517	24.5357	24.0495	23.6012	24.0029	24.6701	24.0947	23.7627	23.2163	22.4522	24.0376	23.2372	23.845	23.7916	24.9148	24.5105	24.4994	23.8937	22.627	21.378	21.3875	22.3487	22.7376	23.7742	25.1112	21.8076	23.1698	24.0266	26.2341	26.8101	28.2926	28.9843	29.9809	30.6513	30.2786	32.6444	34.0731	35.9601	40.3439	43.3557	45.3327	47.0995	47.2817	49.681	51.0039	54.7343	57.2269	61.7008	63.3164
	65.9587	60.9914	62.1847	60.3929	54.9632	51.6725	51.3345	51.1515	50.1254	48.2386	49.7454	49.5042	49.5717	50.3425	51.0843	50.5551	49.771	51.7216	48.8769	48.8668	49.0482	48.7231	49.606	50.4145	50.8679	45.6123	48.1159	50.8976	50.8997	52.5827	54.294	55.5748	56.3621	56.6453	56.4629	58.8657	59.9008	62.8061	65.8514	69.9508	72.5385	72.9461	74.5377	74.7158	76.6369	78.0986	82.2598	85.4156	87.0747
	46.9238	42.7074	42.8218	41.928	41.3418	43.3011	42.4255	41.8724	41.8714	41.0754	41.9313	41.7453	42.6776	43.7394	43.7097	42.9232	43.4487	41.6216	40.389	40.9263	40.2754	40.5059	41.6768	42.9881	44.2316	40.4655	41.5807	44.0013	45.4379	45.6472	46.6732	47.6685	48.6844	48.467	48.6785	50.8233	51.9544	55.4794	58.481	61.1657	63.497	66.4689	65.8056	67.7287	69.2405	72.8521	75.6764	80.7252	80.4298
	54.8782	50.1254	50.4002	49.5179	54.7013	55.1206	55.423	55.3823	53.7304	53.3254	53.8693	52.9232	54.0918	55.6781	55.1986	54.8185	54.1797	54.6743	51.7523	52.1849	52.2424	52.7474	53.9257	55.0428	56.3893	51.945	54.2898	57.1128	58.1537	59.6096	61.8703	63.7335	65.2491	67.2725	67.726	71.6307	74.4118	79.5088	83.7016	88.3337	92.004	95.1983	96.6887	98.6435	102.932	104.465	108.851	113.92	114.885
	25.5622	20.7015	20.8179	19.974	18.631	20.1049	19.5594	18.9616	17.6968	17.5108	18.485	18.5903	19.2168	19.3379	19.5519	18.8315	19.4768	18.876	17.0829	16.741	16.7377	17.8039	18.4697	19.5605	19.4777	17.9618	18.2748	20.3749	21.1058	23.0944	24.7905	26.21	25.8521	27.4733	28.3741	31.384	32.5266	34.1647	38.9429	42.5714	44.8224	45.6886	46.2472	47.6861	49.3364	52.307	54.9539	57.4599	60.7988
	53.4359	48.8974	48.7926	48.07	46.3913	46.1166	46.7939	45.9876	45.033	44.4625	45.4617	44.2365	45.409	45.9604	46.0665	46.0013	45.4066	44.6395	44.0243	42.4474	42.3302	43.597	43.8653	46.0881	46.4781	42.5326	44.615	46.1141	47.3175	47.5218	49.4345	49.836	50.1806	50.0865	49.0676	50.6546	52.9776	54.3245	57.0639	59.8197	61.7473	61.7023	62.2192	61.762	63.4096	64.8722	67.8838	72.3571	72.9671
	38.0144	33.1279	32.6411	32.5399	32.3437	34.6357	34.1855	36.3509	35.3974	33.9055	34.321	34.2573	35.6042	37.0978	36.8215	35.5112	36.3499	37.9352	34.8322	34.7179	35.313	34.9361	37.2262	38.8241	39.0299	37.1819	38.5826	41.2163	41.5278	43.6981	44.2845	45.2447	45.8951	46.7085	46.3765	49.6829	50.8939	53.3473	56.5314	61.4905	63.0993	64.3988	67.4291	66.1307	69.6431	71.7774	75.2018	78.4686	78.8546
	79.7335	74.6859	74.984	73.5325	71.1226	73.4585	74.6853	73.6442	73.3911	70.9618	71.9406	72.5473	72.6388	73.6068	73.1331	73.0652	72.6938	71.9892	70.3922	70.6751	69.6402	69.4669	70.871	72.6553	72.8577	68.716	71.9983	75.2277	77.6371	79.6179	82.6819	84.3056	85.4323	87.4104	87.9873	90.893	92.5275	95.0944	98.6801	102.105	102.469	103.905	102.48	101.597	102.697	104.673	106.249	108.552	107.78
	78.1172	72.0272	72.1079	71.4674	73.2345	78.4088	79.1467	79.4121	77.6308	77.0584	76.2219	78.8516	80.2311	79.4955	80.1969	79.6123	78.5512	78.7238	78.6984	78.7864	79.4024	77.5949	78.8682	81.4192	81.094	78.414	81.7394	86.2042	89.4998	93.0398	97.3925	100.627	108.605	112.726	119.075	126.596	132.93	140.671	152.546	167.095	180.066	187.189	197.832	202.858	209.453	218.45	225.951	232.077	234.243
	73.9433	69.0932	70.1896	68.3957	69.2234	68.4592	68.5462	68.7899	67.6671	67.5773	66.5406	67.0113	69.0641	67.9215	69.2388	68.6027	68.9179	68.3864	65.7504	66.3596	66.3049	66.8834	67.9694	69.0875	69.5798	63.0354	66.3808	67.9497	68.39	68.5519	69.9305	69.1003	71.0631	69.707	69.9513	71.9517	72.8269	75.5104	77.5591	80.8244	81.9919	85.5514	83.0756	84.1006	86.3526	87.7952	91.3775	96.2116	96.961
IP3R1 shRNA+IP3R1	25.3748	25.1213	24.2848	23.3827	22.7705	23.2881	22.7249	22.8176	22.1084	21.8191	21.7961	21.2018	21.0264	21.3491	20.9662	20.7896	20.1604	19.8132	20.1913	19.6972	19.2119	18.9144	18.6723	19.0796	18.3285	19.3981	19.7128	20.2071	21.8505	23.0364	24.4909	25.6301	26.9527	27.9838	29.7387	31.3447	32.6797	34.0164	35.4462	37.9885	39.563	41.2001	43.2822	44.8152	46.1325	47.6707	50.249	51.9899	54.1409
	13.1508	13.0455	12.714	12.3212	11.6577	12.3598	11.9769	11.8048	11.7221	11.7724	11.7083	11.2859	11.6149	11.9424	11.6512	11.5711	11.4859	11.3415	11.448	11.2866	10.8889	10.4565	10.4497	10.7844	10.4887	10.0708	9.94065	10.5235	11.3112	12.2304	13.2976	13.8805	14.9866	16.3546	17.7775	19.2228	20.392	22.1273	23.5972	25.8903	27.5906	29.1463	30.894	32.8548	34.4737	36.4969	38.1784	40.2879	42.3342
	22.2446	21.9161	21.9662	21.1316	20.5484	21.0539	20.6524	20.3852	20.3921	20.4964	20.3228	19.7166	19.6835	20.2946	19.9981	19.6527	19.1929	18.7904	18.6795	18.4486	18.1864	18.0045	17.763	17.1665	16.7929	15.3529	15.9187	16.3668	17.4977	18.3179	19.6624	20.3652	21.8593	23.4656	24.9227	26.6082	28.0234	29.5945	31.5314	33.9483	35.744	37.5499	39.8752	41.7192	43.2419	44.5241	47.0931	48.7021	50.9135
	18.7311	18.3374	18.1513	17.4642	17.0415	17.0606	16.6771	16.7714	16.4974	16.3342	16.1826	15.4843	15.7323	15.7021	15.7972	15.3318	14.7501	14.7093	14.9642	14.6368	14.4227	14.2667	13.8331	14.1986	13.8359	11.5577	11.7901	12.4344	13.1527	13.9926	14.9947	15.661	16.9129	17.8416	19.6535	20.1468	21.5977	22.6633	24.0926	25.8093	27.4199	29.0812	29.8229	31.334	32.1872	33.456	34.9959	36.4966	38.1108
	18.9508	18.3336	18.347	17.6817	17.1956	17.3663	17.1251	16.8096	16.4104	16.1944	16.0669	15.7113	15.5963	15.6029	15.554	14.8999	14.8403	14.7716	14.6877	14.376	14.1677	13.5793	13.3872	13.0952	12.8217	10.8258	10.9391	11.1225	11.8521	12.3799	13.1372	13.4365	14.2004	15.5531	16.9575	17.1807	18.5123	20.0823	20.8945	22.7301	23.8968	25.0113	26.5584	27.5695	28.4926	29.0262	31.1393	32.1993	33.1105
	27.308	27.1044	26.3284	25.5901	25.0419	25.4824	25.0033	24.6254	24.2423	24.3031	24.1182	23.4262	23.7123	23.5369	23.2859	23.3021	22.5137	22.2175	22.3528	21.9843	21.2614	20.7511	20.5473	20.8091	20.2004	19.9839	20.388	20.577	21.9581	23.1319	24.2051	24.9884	26.3586	28.0843	29.5954	31.5054	33.4948	35.9256	37.9969	40.9581	43.7486	45.2898	47.8966	49.9697	52.0748	53.5827	56.3275	58.0888	60.2307
	21.2956	21.2728	20.8565	20.2783	19.7134	19.8793	19.6972	19.2809	18.8683	18.8696	18.6371	18.1869	18.3671	18.2011	17.999	17.8608	17.2885	17.059	17.0456	16.982	16.7435	16.1223	16.286	16.2926	15.4534	17.7109	18.345	18.7792	19.9877	21.5039	23.0964	24.5654	26.0332	27.8381	29.3748	31.0839	32.6322	34.0526	36.1507	38.6274	39.7926	41.3972	43.3362	44.8916	45.9287	47.2794	49.2503	50.3309	52.2183
	19.5809	19.0935	18.8376	18.3553	17.69	18.1157	17.7125	17.6434	17.4957	17.6868	17.6695	16.7465	16.7868	17.0832	16.7804	16.4362	15.8567	16.0038	15.8304	15.1949	14.9238	14.4965	14.6142	14.5566	14.0965	19.4365	19.5552	20.4898	21.557	22.8281	23.9255	24.8303	26.0845	27.7945	29.3535	30.8914	32.0809	33.4142	35.2255	37.4603	39.5631	40.529	42.3866	44.2573	45.5769	47.0188	49.2923	50.5719	52.8152
	49.5782	49.021	49.5692	49.2813	49.937	49.557	50.027	49.7337	49.9765	49.8513	50.0817	50.9148	50.6658	49.9211	50.1472	49.944	49.6735	49.7629	49.7684	49.6674	49.821	49.3514	48.2534	48.4384	48.6588	50.258	50.3579	50.4645	50.2237	50.6688	51.0295	51.3208	51.4402	51.1803	50.9922	48.1327	51.9155	51.8755	52.7641	52.6003	52.5283	52.7365	52.9689	53.3814	53.3868	54.0524	54.0639	54.3826	54.5703
	35.4415	35.2557	35.5622	35.5058	35.9951	35.8524	35.7108	35.5888	35.7241	35.7833	36.0941	36.3025	35.8073	35.6301	36.1475	36.078	36.0869	36.0765	36.4445	36.2913	36.5179	36.2188	35.1155	35.2205	35.3764	36.5763	36.5697	36.8248	36.1783	37.0119	36.8427	36.9524	37.0382	36.6861	37.0266	34.4806	37.3719	37.3649	37.9837	37.4342	37.5129	37.641	37.5032	38.0168	37.7789	38.2636	38.0622	38.5904	38.9162
	20.957	20.6445	20.9311	21.2791	21.2652	21.0411	21.0704	20.7604	21.2572	21.3162	20.8348	21.2179	21.1192	20.8405	21.0264	21.0329	20.7979	21.1058	20.8004	21.4476	21.6389	20.8405	20.395	20.561	20.6928	21.0864	21.1927	21.7027	21.4699	21.4484	21.2696	21.3608	21.7017	21.2309	21.6895	19.6588	22.3304	21.9614	22.3798	22.3733	21.9771	22.3345	22.486	22.2613	22.7289	22.7642	23.079	22.948	23.3562
	29.1037	29.1229	29.2377	29.1368	29.1793	29.0324	28.9974	28.7318	29.1293	28.964	28.7819	29.4483	28.8734	28.6832	28.9877	28.7786	28.5318	28.7551	28.6741	28.6737	28.9249	28.1343	27.6677	28.1502	27.9554	28.4035	28.2548	28.6501	28.4349	28.7046	28.7293	28.8431	29.0473	28.5833	28.8289	26.2775	29.2504	29.2289	29.6136	29.0853	29.3901	29.1173	29.1013	29.4772	29.6873	29.8991	29.7533	30.186	30.0515
	21.0628	20.8605	21.2606	21.314	21.1663	21.2129	20.9944	20.9488	21.2554	21.1766	21.168	21.1925	20.93	20.787	21.3134	21.0694	21.0446	21.1955	21.1707	21.4251	21.458	20.8228	20.2594	20.5532	20.5609	20.7192	21.0229	20.9482	20.517	21.1051	21.0294	21.1135	21.3167	21.0365	21.0194	18.3853	21.6277	21.7672	21.8137	21.4321	21.6189	21.6143	21.4756	21.8868	21.8902	22.2501	22.3256	22.234	22.4506
	34.2539	33.945	34.2316	34.2664	34.4459	34.0484	34.1535	33.5369	34.1309	34.1478	34.2138	34.346	33.7948	33.91	34.0844	33.9158	33.8503	34.3623	34.4594	34.143	34.4554	34.0552	33.0574	33.5883	33.2494	33.3409	33.5374	33.4812	33.2305	33.6899	33.8126	33.9459	33.9576	33.6581	33.7668	31.243	34.5202	34.631	35.1391	34.6816	34.5023	34.6541	34.566	34.9783	35.2165	35.465	35.2943	35.5468	36.1224
	32.3108	32.1139	32.2552	32.2021	32.2294	32.1525	32.3733	31.9166	32.3889	32.2917	32.2603	32.6454	32.1578	31.9245	32.1975	32.223	31.7984	32.2335	31.9956	32.1753	32.3953	31.908	31.1165	31.4497	31.5673	31.9978	32.1954	31.9107	31.8911	32.273	32.3445	32.4287	32.4494	32.3122	32.4141	29.3377	32.9846	32.8713	33.5612	33.1387	33.0914	33.2336	33.3039	33.5657	33.35	33.9887	33.8748	34.0924	34.4234
	37.9766	37.3394	37.5947	37.8025	38.0277	37.7988	37.929	37.3691	37.9926	37.621	37.2882	37.7498	37.2459	36.9742	37.2668	37.1811	37.053	37.4697	36.7234	37.3467	37.3646	37.2607	35.6715	36.3694	36.3249	36.7113	36.7475	37.0214	36.4638	37.3633	37.1254	37.089	37.4565	37.1457	37.0982	33.8034	37.8886	37.4965	37.9931	37.4458	37.5747	37.7298	37.317	37.8238	37.9798	38.783	38.566	38.756	39.4521
	30.2265	30.2991	30.4679	30.5674	30.4075	30.447	30.4117	30.2111	30.3439	30.1479	30.16	30.2878	30.1206	29.6693	30.2183	30.2894	30.0947	30.4964	30.7171	30.9206	31.0406	30.4738	29.6562	29.6469	29.6136	29.3124	29.3188	29.4932	29.4064	29.73	30.0476	29.845	30.125	29.9636	29.8527	26.6213	30.4234	30.565	30.6832	30.5004	30.2087	30.7638	30.3677	30.6216	30.7005	31.4064	31.3103	31.4323	31.8164
	44.2727	43.9623	44.0691	44.4388	43.948	43.4939	43.2819	42.7458	43.3827	42.9015	42.8721	42.6815	42.4005	41.8359	42.0819	41.8324	41.9549	41.9168	41.6481	41.9733	42.0763	41.5806	40.4335	40.4777	40.6769	41.4107	41.5322	42.0106	41.5908	41.8648	42.1266	42.1823	42.3687	42.1077	42.3098	39.2767	42.727	42.6375	43.0975	42.7613	42.5427	42.8844	42.4045	43.0368	42.5815	43.4477	43.0943	43.4604	43.9516
	45.7338	45.1808	45.8424	45.763	46.1303	45.5078	45.3031	45.509	45.3523	45.1838	45.4647	45.4728	45.4236	44.6949	45.5213	45.5386	45.236	45.9481	45.622	45.6394	46.3457	45.625	44.7089	45.8857	44.9801	47.832	48.4683	47.9633	47.748	48.4591	48.5257	48.6433	49.2057	48.6691	48.5196	45.4882	49.0735	49.7247	49.532	49.3762	49.3988	49.6524	49.284	50.1167	50.0831	50.5524	50.9532	50.7253	51.2541
	39.0155	38.8719	39.1787	39.1671	39.6087	38.991	39.2209	39.0529	39.4206	38.9	39.357	39.4244	38.8581	38.9769	39.1829	39.3136	38.7332	39.1378	39.0431	39.4383	39.8175	39.2253	37.9917	38.5653	38.2261	39.4316	40.0023	39.6283	40.0461	40.2733	40.2869	40.2852	40.6349	40.1334	40.5956	37.4563	41.2469	40.6305	41.4335	41.3911	41.1708	41.485	40.975	41.595	41.788	42.1785	42.1732	42.8391	42.6728
	28.705	28.703	28.6726	29.1125	29.272	28.8602	29.0468	28.7794	29.1592	29.0393	28.5396	28.5656	28.2187	28.5911	28.4888	27.879	28.0072	28.2345	28.2768	28.3198	29.0276	28.1518	27.6156	27.4563	27.5584	28.1956	28.1233	28.4422	28.5439	28.2407	28.4038	28.4793	28.8057	28.5791	28.5331	25.4832	29.1071	28.8056	28.901	28.6852	28.5769	28.9759	28.6275	28.8411	29.0802	29.1596	29.3751	29.7656	29.8499
	57.0282	56.3575	56.4426	56.7667	56.6952	56.5941	56.5537	55.9949	56.7023	55.6606	56.0784	56.5042	55.6897	55.15	56.0498	56.4192	55.7607	56.0582	56.1178	56.0818	56.165	56.1088	54.5975	55.4979	55.5845	56.8178	57.0609	57.3149	57.4118	58.0577	58.0691	58.4663	58.2094	58.5908	58.4169	55.0258	59.2255	58.7821	59.6391	59.5008	59.424	59.4798	59.1643	59.8843	59.8507	60.524	60.3654	60.3147	60.8107
	47.028	46.6136	47.085	46.9264	47.0554	46.779	46.7916	46.4697	47.1249	46.4008	46.5696	47.2222	46.6637	46.0735	46.6152	46.3123	46.1601	46.3056	46.4736	46.5455	46.5649	46.4109	45.3294	45.6294	45.7583	46.2273	46.4149	46.4482	46.2256	46.7218	46.8806	47.0988	47.071	46.6618	46.6916	43.7596	47.4731	47.4165	47.9321	47.716	47.278	47.62	47.3346	48.1557	48.2116	48.8098	48.5482	48.9064	48.9768
	33.8966	34.1578	34.2509	33.8345	33.9742	34.0914	34.2899	33.6158	33.855	33.548	33.7859	34.1293	33.6178	33.057	33.1002	33.4293	33.2967	33.4829	33.1036	33.7509	33.8699	32.8564	32.1016	32.3637	31.8271	32.5184	32.4948	32.5774	32.2139	32.8218	33.3423	33.1466	33.1033	32.6189	33.0978	29.9336	33.3107	33.2653	34.0947	33.3666	33.1172	34.1861	33.2442	33.6384	33.6964	34.2419	34.064	34.1879	34.452
	35.5287	35.0618	34.8623	34.6407	35.0585	34.6292	35.4058	34.8409	34.8308	34.4738	34.404	34.3723	33.9942	33.7522	34.3075	34.1851	34.1898	34.6504	34.106	34.2853	34.6026	34.2777	33.2287	33.9843	33.6347	33.5942	34.1562	33.7944	33.875	34.7662	34.473	34.1814	34.5815	34.4095	34.6771	31.4566	35.0285	34.5196	35.2475	34.8468	34.9012	35.0293	34.9236	35.1207	34.8715	35.8212	35.3284	36.1266	36.3706
	44.6111	44.1438	44.563	44.3376	44.4284	44.5314	44.4706	43.555	44.2042	44.1122	44.0681	44.3558	43.9305	43.839	44.0833	44.3539	43.8395	44.3879	44.3984	44.0023	44.218	43.6548	42.5753	42.8706	42.4858	42.8119	43.2688	43.5215	42.9142	43.1078	43.2287	43.1327	43.8488	43.2082	43.3529	40.6063	43.5528	43.6739	44.0747	43.8415	43.7814	43.7559	43.619	43.8787	44.2261	44.4999	44.5577	44.6324	45.0931
	29.8808	29.5762	29.9267	29.9402	29.7176	29.8955	29.6227	29.5828	29.8216	29.6573	29.6872	29.8169	29.4599	29.3181	29.4719	29.5205	29.3214	29.3937	29.5214	29.4683	29.9079	29.257	28.6299	28.6779	28.4272	29.0566	29.0629	29.4157	28.9726	29.6837	29.6451	29.6937	29.6582	29.6994	29.8953	27.3607	30.2729	30.0537	30.3437	30.0741	30.1575	30.2648	30.0818	30.4441	30.3671	31.1145	30.8882	31.1487	31.156
	27.7053	27.5147	27.7862	27.8178	27.9097	27.6373	27.7331	27.396	28.0354	27.7187	27.7934	27.5769	27.2459	27.1117	27.0523	27.0253	27.1961	27.6057	27.5812	27.5234	27.5553	27.4232	26.6273	26.6897	26.9389	27.2707	27.5298	27.7262	27.2655	27.9742	27.976	28.1601	28.3039	28.1362	28.2317	25.4656	28.6393	28.321	28.7292	28.0829	28.4705	28.348	28.2359	28.5352	28.8271	29.2021	29.3073	28.9287	29.3844
	30.4742	30.2348	30.7504	30.654	30.5518	30.2047	30.0608	30.0713	30.199	30.3593	30.138	30.2394	30.271	29.9801	30.0202	30.0271	29.8866	29.8416	30.1788	30.3128	30.2009	29.4644	28.6816	29.0148	28.7617	29.5805	29.8535	30.1552	29.8108	30.6004	30.5077	30.5638	30.616	30.5302	30.7567	28.3416	30.958	31.0707	31.3715	31.0769	30.7725	30.7543	30.7236	31.0928	31.1123	31.4054	31.5425	31.9266	31.9821
	22.1061	24.3459	23.3739	23.8239	24.0236	24.0032	23.7256	23.5612	23.9306	23.6485	23.6363	23.6745	23.7569	24.1162	23.6745	23.4402	23.7677	23.4873	23.6665	23.1369	23.0009	23.1546	23.2346	23.5119	23.4938	23.8228	23.2994	24.441	25.2623	25.9474	26.4873	27.1637	28.1412	29.5466	30.6762	31.8173	32.9618	34.4	35.3837	36.7245	38.3483	40.0204	41.2641	42.545	44.2858	45.424	47.2198	48.3046	49.3344
	20.8043	23.1495	22.8441	22.8237	22.6522	22.8136	22.7226	22.6575	22.9254	22.6965	22.8464	22.9956	23.3314	23.3438	22.9779	22.8167	22.957	22.77	22.0804	22.324	22.1171	22.5298	22.1993	22.4403	22.477	22.7642	21.9776	23.2101	23.48	24.1971	24.2623	25.2309	25.8464	26.7522	27.384	28.6886	29.1931	30.9154	31.481	32.1649	33.1815	34.1407	35.1498	36.0502	37.1249	37.8861	39.27	40.0672	41.1201
	26.4925	28.5139	28.6955	28.7459	28.362	28.2297	28.4871	28.8754	29.2868	29.141	28.9704	29.503	29.5005	29.6595	29.1697	28.5846	29.3752	29.155	29.2334	29.0515	28.7733	29.0383	29.1715	29.9457	29.2113	30.0925	29.6181	30.677	31.646	32.1154	33.0076	34.1079	34.9706	36.3687	37.1395	38.9162	40.0149	41.8424	43.1681	44.8449	46.4651	48.4714	49.9625	51.5711	53.4225	54.6344	56.7809	58.6902	60.3815
	33.0059	35.3541	34.1783	34.7604	34.5946	34.7735	34.4256	34.5783	34.6432	34.4715	34.6373	34.7289	35.1238	34.9881	34.6886	34.1346	34.5237	34.1493	34.3119	34.4037	34.24	34.4832	34.5437	34.4432	34.4444	34.8256	34.3365	35.5491	36.1451	36.3753	36.9177	37.5269	37.7692	38.4823	38.7208	39.398	39.857	40.9176	41.2944	41.8427	42.3741	42.6942	43.168	43.4582	43.7691	44.2159	45.4348	45.62	46.085
	37.895	39.848	39.6712	39.687	39.213	39.64	39.2628	39.3715	40.084	39.6582	39.7745	39.6377	40.0139	40.0539	39.8069	39.2847	39.4288	39.248	39.329	39.3214	39.073	39.0166	39.1018	39.4354	39.0208	39.6436	38.9984	40.3855	41.0193	41.6249	42.6409	43.9123	44.692	45.5887	46.8235	48.425	49.9304	51.5826	52.8269	54.7231	56.2708	58.337	59.8188	62.2687	63.6264	65.7745	68.2577	70.0773	71.932
	16.0027	18.6539	18.5394	18.4643	18.2045	18.3909	17.9527	18.4577	18.2514	18.4288	18.3635	18.4403	18.6524	18.5064	18.4667	18.0264	18.2747	18.2119	18.2805	17.7485	17.7523	18.0477	18.0771	18.2803	17.9683	18.0799	17.3535	18.6486	19.0023	19.1335	19.7992	19.8788	20.3794	21.1762	21.5787	22.3858	22.8464	23.9964	24.6509	25.4226	26.0866	26.9509	27.6205	28.7603	29.3701	30.2452	31.5566	32.2166	33.3403
	18.7195	20.8173	20.9773	20.4807	20.5613	20.7689	20.3548	20.3535	20.6859	20.6757	20.64	20.8196	21.3475	21.0594	21.0999	20.6877	20.824	20.4055	20.593	20.5365	20.6167	20.6307	20.5499	21.1166	20.7716	20.8212	20.1785	21.2371	21.7542	21.8786	22.5062	23.014	23.2895	23.5819	24.0752	24.7631	25.5777	26.213	27.0042	27.5149	28.1531	28.9358	29.6112	30.3416	30.9106	31.8234	32.956	33.6761	34.299
	20.6642	22.9544	23.2497	23.1715	22.844	22.9451	22.7164	23.2349	23.3278	23.2333	23.3951	23.3957	23.8761	23.6123	22.9913	22.7198	23.2494	22.8553	22.9308	22.6438	22.5429	22.8378	22.6887	23.265	23.0484	23.1765	22.2959	23.5723	23.8144	23.9839	24.1934	24.4804	24.8664	25.2326	25.3287	25.8169	26.0302	26.7447	27.3471	27.7758	28.3479	28.5583	29.182	29.937	30.3465	31.0664	32.4151	32.8613	33.5973
	17.8338	19.9015	19.4149	19.6342	19.5758	19.7753	19.4267	19.524	19.7558	19.4649	20.0286	19.7954	20.0343	20.1141	19.8277	19.493	19.7122	19.5441	19.383	19.1522	19.0666	19.4087	19.4212	19.7475	19.7566	19.5736	19.1302	20.2223	20.6367	20.9625	21.548	22.1098	22.6508	23.4623	23.8233	24.5633	25.1808	25.9957	27.1256	27.7207	28.7642	29.8916	30.976	31.964	32.9996	33.9057	35.6154	36.6296	37.7968
	24.9152	27.4706	27.5265	27.3066	27.1737	26.9914	27.1711	27.534	27.526	27.6359	27.7369	27.4723	27.8473	27.8889	27.7966	27.2995	27.5887	27.2209	27.219	27.2012	27.1373	27.1291	27.4415	27.5823	27.0402	27.4723	26.7514	28.0374	28.4639	28.7486	29.1214	29.464	29.921	30.2141	30.965	31.6588	32.1525	32.7169	33.4862	34.1012	34.8951	35.8432	36.4496	37.1264	37.3536	38.0765	39.5504	39.9381	40.6657
	26.5047	29.1984	28.343	28.5771	28.1474	28.4861	28.1539	28.3571	28.8678	28.6234	28.6416	28.8468	29.1106	29.0643	28.6114	28.6963	28.6383	28.4666	28.5174	28.2981	28.1436	28.8324	28.367	28.7793	28.6703	29.1086	28.115	29.328	30.0853	30.1999	30.8094	31.3736	31.4094	32.2129	32.2999	33.2491	33.8357	34.5683	35.3731	36.0662	36.7649	37.6222	38.4829	39.5523	40.5092	40.9147	42.5145	43.6459	44.4562
	17.211	19.4885	19.6252	19.4252	19.4963	19.5734	19.2541	19.4318	19.5922	19.3427	19.5242	19.7415	19.8194	19.9515	19.7896	19.4562	19.4221	19.4321	19.3618	19.2662	19.1561	19.2663	19.1114	19.2057	19.1588	19.1409	18.3905	20.0048	20.2189	20.7817	21.3986	22.0247	22.6702	23.464	23.9081	24.9747	25.6158	26.472	27.3805	28.0433	28.9624	29.9682	30.8444	31.8902	32.6951	33.8805	35.441	36.2336	37.306
	27.6286	30.3672	30.126	29.7544	30.203	30.0914	29.6183	30.0877	30.1817	29.8508	30.4782	30.5075	30.9989	31.2891	30.5114	30.4583	30.8719	30.4954	30.2089	29.9866	30.1442	30.7762	30.4385	30.7659	30.5934	31.1569	30.5105	31.6396	32.3962	32.4861	33.1759	33.4604	34.3072	35.0785	35.0036	36.5175	37.0967	38.2453	39.071	39.7996	40.885	42.3252	43.0232	44.4618	45.0703	46.4032	48.1434	49.5928	50.4642
	26.7515	28.8394	28.8597	29.0028	28.6926	28.8617	28.8223	29.1709	29.3188	29.1273	28.9571	29.1356	29.3793	29.5812	29.049	28.5615	29.1482	28.699	28.8615	28.6785	28.8253	29.2035	29.2896	29.4783	29.0504	29.6864	28.9392	30.6688	31.5147	32.026	32.9263	33.5464	34.5685	35.8743	36.4671	38.0015	38.9572	40.1206	42.043	43.4149	44.9327	46.0913	47.2268	48.5605	50.0316	51.0673	52.5434	53.843	55.1743
	42.0828	44.8248	44.5098	44.3579	43.8449	44.1734	43.4672	43.6542	44.1213	44.2158	43.8081	43.9299	44.4934	44.1917	43.9229	43.636	43.8731	43.5133	43.6594	43.7048	43.2787	43.825	43.8961	44.1732	44.0929	44.1198	43.4052	44.9803	45.6783	46.3062	47.5371	48.4336	49.2661	50.5294	51.4199	53.3332	53.9716	55.907	57.3462	58.5016	59.8719	61.4212	62.3932	64.0491	64.972	65.9194	67.7387	68.5612	70.0721
	19.1378	21.3809	20.7273	21.2035	20.9829	21.0512	20.867	20.813	21.2632	20.9535	21.017	21.1527	21.4127	21.2896	21.0906	20.888	21.0437	20.391	20.508	20.4323	20.1615	20.3997	20.5157	20.6245	20.52	20.7627	19.8216	21.2359	21.377	21.7571	22.4251	22.812	23.4619	23.7564	24.0853	24.8483	25.1845	25.8476	26.2894	26.6878	26.9164	27.4417	27.9241	28.1087	28.4036	28.5508	29.2261	29.4093	29.6658
	26.2584	29.0992	28.5648	28.6607	28.369	28.5937	28.2513	28.4173	29.1128	28.542	28.4743	28.6444	28.9853	29.1243	28.5695	28.168	28.4021	28.1127	28.273	28.1899	27.9209	28.4368	28.4378	28.4973	28.6104	28.6134	27.9335	29.1379	30.191	30.322	31.5136	31.7757	32.6038	33.1791	33.8295	34.5869	35.4255	36.4887	36.7709	38.1508	38.3474	39.3251	40.3055	40.7096	41.0286	41.7377	42.7091	43.5731	43.3691
	14.1629	16.2705	16.3215	16.1028	16.1166	16.238	15.939	16.1714	16.3264	16.3376	16.3045	16.5097	16.7207	16.5466	16.4478	16.1495	16.1589	16.2108	15.9909	16.0511	15.8589	16.2102	15.9113	16.2779	16.1833	16.4431	15.6698	17.0122	17.2514	17.6727	18.0636	18.7192	18.9316	19.5831	20.3877	21.4552	21.9208	22.9851	23.8859	24.8162	25.4974	26.5455	27.1558	28.2246	28.9093	29.6089	30.968	31.7757	32.9588
	23.1815	25.2249	25.0103	25.2582	25.0367	25.2593	24.9988	25.0435	25.5131	25.5871	25.5993	25.2857	25.7459	25.4143	25.0641	24.8043	25.0394	24.7146	24.5676	24.4909	24.2887	24.5302	24.6398	24.9332	24.75	25.0125	24.2735	25.368	25.5237	26.2898	26.7406	26.9526	27.7671	28.6928	28.7909	29.9529	31.0112	31.9696	33.1436	34.2796	35.782	36.9182	38.1803	39.3424	40.7938	41.8317	43.7384	44.8885	46.2849
	36.6583	38.1833	37.8249	37.7577	37.4721	38.0102	37.5867	37.8917	38.3448	38.4235	37.8822	38.0152	38.4492	38.3292	38.1823	37.9553	38.407	37.8824	38.1547	37.7181	37.7213	38.0743	38.031	37.8742	38.288	38.1031	37.6505	38.8712	39.3133	39.3249	40.3196	40.4517	40.7715	41.3037	41.7672	42.6736	43.1986	44.131	45.3405	45.9723	47.2146	47.8159	48.7861	50.1279	51.1954	52.4114	54.283	55.011	56.6046
	29.1017	31.0037	31.2304	30.7171	30.7053	31.1671	30.7636	30.5888	31.334	31.1534	31.1499	31.0467	31.4899	31.4167	31.2665	31.0736	31.5287	31.4217	31.4563	31.4141	31.6895	31.9564	31.617	31.4989	31.3459	30.9209	30.211	31.4419	32.1779	32.4711	33.1182	33.6732	34.2987	35.0239	35.419	36.6662	37.9659	38.952	40.5133	42.2627	42.9612	44.5964	46.0201	47.6469	48.784	50.6622	53.115	54.8545	56.2099
	15.9749	18.3899	17.9685	18.189	18.11	18.1509	17.8299	18.3522	18.3091	18.0202	18.6147	18.5927	18.5738	18.7278	18.6097	18.2092	18.4645	18.1459	18.0206	18.2451	18.0423	18.1557	17.9741	18.0794	18.4001	17.9425	17.5392	18.473	18.9146	18.9045	19.623	19.868	20.1507	20.6044	20.7752	21.789	22.1206	22.9435	23.5092	24.4583	25.0877	25.5228	26.578	27.1502	28.2229	29.0376	30.3581	31.1684	32.2578
	21.0001	22.8941	22.5859	22.8582	22.2828	22.7445	22.3084	22.5969	22.7068	22.661	22.5374	22.8387	22.9601	22.8958	22.8432	22.389	22.3565	22.2784	22.5561	22.2768	22.3676	22.3733	22.3916	22.5789	22.3261	22.6184	21.8626	22.8413	23.1838	23.3139	23.6029	23.9967	24.2719	24.6517	24.9873	25.6778	25.9595	26.5148	27.0182	27.8148	28.6745	29.1368	29.7044	30.6181	31.3697	32.1793	32.8822	34.0451	34.7916
	18.5838	20.8043	20.8411	20.8566	20.8975	20.8814	20.5871	20.7925	21.1788	21.0708	20.9815	21.3616	21.6735	21.4245	21.0341	20.8535	21.0982	20.5012	20.5091	20.5198	20.4411	20.6855	20.6004	20.9704	20.6069	20.6384	19.9943	21.1073	21.3513	21.8755	21.914	22.4397	22.8613	23.2116	23.9239	24.8571	25.227	26.0691	26.9275	27.7438	28.3438	29.478	30.1447	31.4479	32.1839	33.1818	34.5761	35.5934	36.5377
	20.5476	22.5236	21.8297	22.0115	21.9786	22.2502	21.8969	21.9509	22.305	22.0268	22.0799	22.3	22.4309	22.3078	22.0915	21.9715	22.0665	21.7092	21.8752	21.776	21.4851	21.9037	21.699	21.9367	21.9531	22.3549	21.4987	22.985	23.1642	23.0243	23.4968	23.8388	24.5086	24.8892	25.4724	26.1445	26.6429	27.8345	28.5672	29.4365	30.4415	31.7028	32.5807	33.7242	35.1065	36.0043	37.3413	38.8618	39.6333
	32.7957	34.7346	34.2791	34.5804	34.4132	34.5336	33.9984	34.202	34.2758	34.3596	34.2314	34.323	34.5469	34.5388	34.0935	33.8659	34.1028	33.7074	33.4322	33.4032	33.2048	33.6571	33.8287	33.8174	33.706	33.7423	32.8096	34.0169	34.4184	34.4894	34.8918	35.4483	35.6154	35.8619	36.3482	36.8095	37.9453	38.1759	38.6316	39.1771	40.0491	40.5005	40.8835	41.8001	42.3098	43.0143	43.8959	44.3517	44.9265
	26.7679	28.5254	28.8629	28.5793	28.3124	28.6006	28.1313	28.6125	28.8786	28.1214	28.4726	28.6173	28.9963	28.9132	28.6819	28.3207	28.2737	28.2187	28.4506	28.1538	27.7333	28.354	28.1815	28.1396	28.0742	28.4413	27.8676	28.8246	29.3793	29.4622	30.0777	30.5667	30.9854	31.4822	32.2116	33.4712	33.7815	34.6493	35.4396	36.5033	37.4205	38.5709	39.8556	40.8507	41.8787	43.04	44.6258	45.7625	46.751
	25.2748	27.5346	27.3823	27.3487	27.2902	27.2279	26.7344	27.1179	27.2441	27.1883	27.1803	27.1676	27.2536	27.5754	27.2554	26.9288	27.0495	27.0924	27.1795	26.5545	26.3868	27.1621	27.0791	27.085	27.0777	27.1844	26.4564	27.6524	28.192	28.0952	28.5533	29.0854	29.564	29.9348	30.0324	30.5	31.5945	31.6328	32.6594	33.1495	34	34.9157	35.4407	36.3341	37.1898	37.9297	39.2613	40.348	41.4519
	25.8833	28.1563	27.7991	27.5604	27.6136	27.5674	27.2538	27.7471	27.8806	27.8385	27.9009	27.8108	28.0374	27.9965	27.9007	27.5563	27.9373	27.5372	27.5122	27.5056	27.1217	27.4349	27.8205	27.8297	27.8536	27.42	26.9946	28.1026	28.4749	28.698	29.2001	29.5311	30.0605	30.6023	31.0806	31.9107	32.4402	33.4614	34.4455	35.0244	35.9368	36.7063	37.6343	38.7715	39.7339	40.6811	42.04	42.809	43.7967
	14.2896	16.7925	16.6819	16.58	16.6856	16.8413	16.4666	16.4401	17.0571	16.7153	16.8868	16.8804	17.2271	17.1881	16.9579	16.6751	16.6814	16.3959	16.5643	16.2523	16.2626	16.1567	16.4897	16.6461	16.5122	16.9042	16.1492	17.8029	18.2629	18.9808	19.874	20.5505	21.4022	22.3903	23.4052	24.5313	25.6778	27.0161	28.2478	29.294	30.489	31.8628	32.8963	34.2963	35.0933	36.2081	37.9313	38.5986	39.8331
	59.6528	61.2518	62.4203	61.4134	61.0291	62.1024	60.8826	61.3892	61.9752	61.6743	61.7513	61.7858	62.5444	62.9491	62.3064	61.5551	61.9872	61.8037	61.7681	61.6904	61.6508	62.0057	62.3084	61.8939	62.2477	62.8094	61.726	63.4194	64.1107	64.7013	65.029	65.762	66.3553	67.4704	67.8777	68.8661	69.8144	71.3343	72.3122	73.6875	74.8776	76.054	77.4539	78.8667	80.2004	81.3018	83.5562	85.2	86.4366
	44.3202	46.6717	46.1786	45.8294	45.4277	45.5941	45.0954	45.3355	45.9825	45.4511	45.225	45.6288	45.501	45.1669	44.7539	43.9048	44.3341	43.5622	43.4284	42.9803	42.6323	43.0511	42.8908	42.7951	42.6824	42.0946	41.2092	42.7304	43.6726	44.3977	45.1751	46.1648	47.3984	48.6315	49.1162	50.6575	52.1414	53.7822	54.728	56.3103	57.065	58.1079	60.0398	61.1132	62.1073	63.7965	65.1488	66.4768	67.8261
	16.9949	21.2208	21.2761	21.6841	21.536	21.4571	19.9008	18.9133	19.1387	19.3152	20.6388	21.1168	20.7826	20.5161	19.414	18.6583	18.1838	17.9227	18.111	17.7079	18.8912	19.2555	19.7584	20.2387	19.6671	17.3906	18.2199	21.1162	23.2136	23.6634	24.8876	27.0731	26.8107	32.7179	33.5714	35.4873	36.2816	38.7862	41.8134	43.0926	45.0227	47.1558	47.9454	49.9237	51.2472	51.1817	52.9955	54.8306	55.3564
	49.8811	55.0893	54.6614	55.3535	54.6429	56.137	52.6547	50.7372	52.0359	53.0186	54.8019	55.1518	54.4888	53.9768	53.5112	52.3824	52.2895	53.4992	53.7031	53.3416	55.018	56.4235	56.8228	58.1113	57.625	58.2234	60.629	65.1587	69.3439	70.4923	74.253	79.1998	81.8415	90.1509	93.3824	97.7307	100.593	104.846	109.859	112.237	115.486	121.256	123.506	126.807	128.811	129.199	131.867	133.516	135.091
	36.9556	41.8555	42.2043	42.5217	41.906	43.0218	39.5001	37.3996	37.4961	38.3465	39.9017	39.4481	39.1679	38.8708	37.9051	36.9414	36.5337	36.5643	36.875	36.5133	37.3563	38.2533	38.6889	38.9424	38.4771	36.2895	37.56	41.4075	45.4193	45.2542	47.0652	51.3188	51.528	58.9326	59.8043	62.0679	64.1454	66.9609	71.1159	73.0771	75.2674	77.9254	79.3075	80.898	81.9659	81.8057	83.2208	84.9827	85.037
	16.9318	21.8676	22.1886	21.8194	22.0435	22.4461	21.4463	19.678	20.3062	21.0321	22.0082	22.4575	22.5723	21.7355	20.6984	20.1027	19.7583	19.6546	20.3546	19.7226	21.2391	21.8097	22.4444	22.2308	22.053	20.6633	20.898	23.9563	26.0503	25.3935	26.9667	28.4612	28.4477	34.0465	34.8908	36.8727	37.9287	40.4505	44.1338	45.5514	47.335	50.0856	51.992	53.517	54.1269	55.6517	56.8576	58.1039	59.092
	14.6302	19.6327	19.7033	19.7208	19.9072	20.0224	19.2697	17.7198	17.9672	19.0373	19.6955	20.0626	19.4549	18.5697	17.72	16.8272	16.3943	16.3978	16.5322	16.2269	17.3279	17.8325	18.0652	18.3079	18.0041	16.1622	17.2435	19.6842	21.1901	20.5707	21.6417	23.721	23.042	28.3177	28.8834	31.0126	31.8934	34.427	37.3867	38.9589	40.7766	43.3011	45.1056	46.8169	48.335	48.6165	50.7584	52.3681	53.2689
	6.78699	11.9543	12.194	11.9984	12.6681	12.9749	11.5469	10.7545	11.1921	12.073	13.0622	13.4154	13.4774	12.248	11.5875	11.333	10.5714	10.6834	10.7002	10.4712	11.7338	12.0336	12.8896	12.7979	12.6436	11.7451	12.6238	15.266	16.3195	16.2002	17.5804	18.9035	18.1585	23.875	24.1017	25.7421	26.5218	28.6702	32.1927	33.7329	35.3568	37.0843	38.6296	40.196	40.8828	41.2052	43.034	43.8238	44.6842
	21.6141	27.0601	26.9387	27.6876	26.4874	27.4106	24.9766	23.8156	24.0017	25.3316	26.1534	26.0593	25.6401	24.6409	24.3237	23.59	22.4485	23.3879	23.7681	23.6929	24.1048	25.2253	25.3394	25.5308	24.9674	24.2735	24.6875	27.4876	30.1439	29.4582	31.8804	34.8592	34.3346	40.3562	42.1747	44.6944	46.3995	48.7216	52.3023	54.2114	55.6481	58.2107	59.6766	61.6591	61.7586	62.4622	63.6541	64.7049	65.4551
	22.247	27.5153	27.4512	28.1184	26.9745	28.5378	27.7682	26.6084	26.5145	27.0406	27.5275	28.1255	27.8158	26.9954	26.0425	25.2358	25.0257	24.8782	24.8002	24.3345	25.7471	26.6226	27.1923	27.1477	26.5973	25.1971	26.4222	29.31	32.0266	31.7308	33.0371	36.4404	36.3134	43.2147	45.7531	48.3802	49.8456	54.5103	57.6516	60.3505	63.0373	65.5544	67.8351	68.3604	70.3339	70.6979	71.769	72.8346	73.0472
	4.21008	8.65753	9.74351	9.38214	8.97833	9.49164	7.43966	5.98369	6.32124	7.28658	8.0954	8.33015	8.28487	7.32333	6.86658	6.02431	5.77322	5.65715	5.59679	5.38525	6.1547	7.00517	7.80516	7.67558	7.84856	5.39921	6.46809	8.34559	10.0414	9.87987	10.2248	12.7262	12.161	17.0236	17.9036	19.4278	21.3502	23.6128	26.5498	28.1372	29.8001	32.3464	32.8188	34.7356	35.4804	35.2304	36.9165	38.2237	39.1181
	15.6668	20.9208	21.2775	21.3118	21.1697	22.0621	20.9641	20.0512	21.2019	21.5343	22.7208	22.3164	23.1241	22.1975	20.5376	19.6124	19.1087	20.294	19.6504	20.3608	21.4663	22.5369	22.2243	23.3169	21.9865	21.2184	22.4767	24.964	26.9437	26.1105	28.1856	29.6285	29.9432	36.0918	37.0169	39.3675	41.272	44.1814	47.1694	48.9984	51.6054	53.9065	55.7167	58.1083	59.5926	58.7492	59.5855	61.7826	61.6125
	12.9511	18.4061	18.0164	18.4644	18.1985	18.7089	16.6102	15.3897	15.7508	16.3804	17.1167	17.5254	17.3052	17.2496	15.7269	15.4847	15.0043	14.8587	15.4704	15.0122	15.687	16.7692	17.3448	17.392	16.872	15.3641	16.2081	19.2015	20.941	21.4621	22.6644	24.834	24.4723	30.5427	32.0529	33.466	35.0717	38.5914	41.3188	43.1252	45.2015	47.0149	48.882	50.4955	51.8475	50.6834	52.5212	53.2018	53.6146
	1.17905	6.10022	7.08866	6.67505	6.69231	7.2993	6.03809	5.22835	5.25523	6.02475	7.06475	7.43712	7.49125	6.62902	5.63136	5.34271	4.95001	4.98606	5.33951	4.71409	6.15391	6.70006	6.7441	7.29044	6.83124	5.13732	5.91953	8.28964	10.2086	9.80467	10.3094	12.2237	11.3809	16.8545	18.4538	20.1375	21.627	24.1492	27.4224	29.164	30.9734	33.8922	34.8219	36.9074	38.231	38.6743	40.5155	41.4755	42.7112
	5.41327	10.5051	11.158	11.5394	11.7954	12.2418	10.3505	9.13915	9.41373	10.0491	10.9825	11.5119	11.1345	10.0451	9.14905	8.82915	8.31179	8.65393	8.92607	8.24924	9.26727	10.2205	10.3387	11.0941	10.1165	8.34562	9.77935	11.5056	12.7983	12.2096	12.6434	14.965	14.104	19.156	20.0288	22.1718	23.43	26.4606	29.693	31.4778	33.8356	35.8531	38.0883	39.5418	41.2377	42.1453	44.3033	45.6047	46.4142
	19.9015	25.6382	26.133	26.2688	25.8787	26.7109	24.4643	23.4012	23.3051	24.1781	25.7665	25.8589	25.7349	25.3847	23.5152	23.2533	23.1046	23.0657	23.1281	22.8642	24.2433	25.3433	25.776	25.8505	25.7159	23.3846	23.9536	25.9197	27.3144	26.3722	26.5056	28.4701	26.7463	32.5793	34.3344	35.3201	36.5408	39.7997	42.5894	44.9402	46.937	49.8019	51.124	53.0397	54.7371	55.2188	58.1209	60.3415	61.4642
	11.8356	16.9093	17.7987	17.8241	17.5754	18.4993	16.386	15.482	15.4552	16.1715	17.9155	17.2301	17.8996	17.5124	16.2631	15.4393	15.48	15.0562	15.5304	15.2708	15.8152	17.0446	17.5488	17.6767	17.3902	15.9818	17.1129	19.5317	21.2838	21.2017	22.4783	24.4825	23.8864	29.8826	31.2944	32.5793	34.8224	37.2575	40.5101	42.0447	44.6195	46.6391	48.1851	50.649	52.2056	51.5498	53.0495	55.1365	54.8588
	6.35503	10.9988	11.6767	11.9128	12.0019	11.9698	11.0176	10.1923	10.2824	10.9243	12.3651	12.1292	12.0686	11.9325	11.0141	10.4287	10.0721	9.77382	10.6274	9.87787	11.5982	11.8387	12.0431	12.2066	12.1689	11.5802	11.4924	14.0202	15.5676	14.8395	15.9948	17.8333	16.8741	23.1909	24.0924	26.0086	27.2234	29.768	32.7501	34.9826	36.4914	38.9842	40.6665	42.28	43.0817	44.1968	46.7094	48.3363	48.5954
	33.3021	38.1446	38.7994	39.2219	39.3762	39.6788	36.5629	34.9382	35.326	35.9677	36.6792	37.7303	37.2946	36.3721	35.1729	34.7151	34.3491	34.2663	34.5376	34.3098	35.6469	36.4626	36.0938	37.3208	37.1521	35.3159	36.1874	39.3176	41.3073	41.1439	42.6928	45.6761	44.957	51.8404	53.4296	55.2822	57.7853	60.9967	63.8137	65.5153	68.0665	70.1839	72.4625	73.9658	75.4614	75.6106	78.1145	77.9524	79.2989
	26.6182	32.167	31.8808	32.7789	32.4356	33.3386	30.1605	28.7411	29.3079	29.82	30.6422	31.665	31.5319	30.6529	29.4855	28.7028	28.6846	28.5351	29.9196	28.7258	31.2151	31.3088	31.5219	32.2704	31.1114	29.8989	31.5403	34.418	35.366	34.8416	37.4799	40.6322	40.5118	46.891	49.4565	51.7751	54.9003	57.4775	62.2989	65.9284	68.025	71.7313	74.0631	74.9519	76.8774	77.0118	78.6679	81.7088	81.7618
	20.36	25.0958	26.0755	26.2164	26.0273	26.6511	24.5336	22.6137	23.8299	24.1469	25.3604	25.5771	25.7027	24.0518	23.4297	23.0402	22.9209	22.8824	23.0005	22.3659	24.0596	24.152	24.8166	25.4822	24.7215	22.2657	23.1508	26.2108	27.8855	26.9854	28.375	30.5424	29.5126	34.9868	36.7357	38.3609	39.5132	41.9514	45.1281	47.4115	48.778	50.9063	53.2499	53.9696	54.3681	54.9246	56.418	57.8078	59.0563
	0.16237	5.16434	5.34846	5.57971	4.8668	6.08357	4.10882	3.16233	4.03448	3.99408	5.39421	5.11829	4.90781	4.57205	3.56473	3.14055	2.52953	2.83331	2.91654	2.56452	3.9896	4.4648	4.52624	4.63071	4.50518	2.90913	3.57764	5.54186	5.73493	5.16257	4.81621	6.24018	4.69357	8.86282	8.51578	9.38976	9.15268	10.9621	12.8231	13.6338	14.1607	15.0444	16.3271	16.9469	17.4304	17.482	18.1425	19.5898	20.127
	3.41439	7.97712	8.35222	8.64488	8.2101	8.9241	6.87594	5.53976	6.32285	6.68911	7.891	8.14961	8.19622	7.5993	6.69424	6.1357	5.54517	5.36596	5.38784	5.10422	6.4086	7.35612	7.56301	7.40995	6.94413	5.97391	6.35987	8.02199	8.9271	8.11993	8.6946	9.67746	8.18529	12.7618	13.0056	14.0802	14.6408	16.6308	18.0872	19.3909	20.7325	22.6547	23.6013	25.0919	25.6935	25.8955	27.2677	29.1326	29.6838
	11.7317	16.3406	16.3971	16.9275	16.9046	16.7038	15.1213	13.8356	14.1388	15.0967	15.886	15.6561	15.897	15.4962	14.7886	13.5932	13.4763	13.2602	13.6929	13.2212	14.6135	15.0982	15.3656	15.8123	15.4693	13.6521	14.223	17.0217	18.784	18.6081	19.2765	21.5149	20.811	27.1465	28.3465	30.3155	31.6193	35.067	37.9783	40.5035	42.8634	45.6755	47.7957	49.872	51.2787	52.398	54.69	56.5933	57.4923
	20.2711	19.8456	18.0802	17.2436	18.6372	17.9643	17.2594	17.146	17.0434	16.9232	17.1683	17.7931	17.9376	17.6271	34.4838	39.7524	39.9018	38.985	38.8022	40.0523	40.2487	41.8677	42.0181	42.1298	44.9611	46.7004	46.2234	45.103	43.0118	43.7022	44.3722	45.6931	46.298	47.1051	46.5687	47.6445	47.2104	47.0538	46.2676	46.9129	45.5177	46.0573	44.56	42.6407	42.665	41.788	41.7695	41.7107	42.19
	26.0757	25.4006	23.3183	21.6919	24.2307	23.2402	21.7343	22.1464	22.1791	21.6672	21.3287	22.1998	22.9705	22.857	28.5574	33.3315	33.4119	32.7629	32.7897	33.6731	33.7177	34.6263	35.5313	35.9622	38.1892	39.4663	39.616	38.6209	36.7333	37.6797	38.0142	40.0364	40.5564	41.7776	41.5991	42.6387	43.0671	41.9643	42.4649	42.6094	42.0083	42.0384	41.4054	39.9603	39.6916	40.0443	40.663	40.6423	41.5628
	44.4629	44.1204	41.579	40.9507	42.7747	41.9575	40.3537	40.2874	40.5914	40.0006	40.1074	40.9818	42.1081	40.9634	57.059	62.9673	63.8851	63.84	65.0145	66.6619	68.2316	71.2627	72.1179	72.5864	76.0298	78.4361	79.1443	76.7276	75.1125	76.8993	76.7375	79.5242	80.9785	82.5118	82.0751	83.0423	83.6554	83.9442	83.5944	83.8715	82.7763	82.5861	80.5766	78.4519	78.0978	78.1695	78.2302	78.0336	78.5372
	30.0155	29.3202	27.7812	26.28	28.3297	26.9497	26.1163	26.2968	26.2826	25.5202	25.6654	26.849	26.6206	27.152	34.9942	39.8454	40.3103	40.7965	41.5474	42.9671	43.5485	44.5696	45.6412	46.4917	48.677	51.3757	51.234	50.5486	48.8429	49.6046	50.1838	52.6276	52.7894	53.9884	53.332	54.6508	55.6563	55.0628	55.3329	55.9558	55.1363	55.2485	53.9407	51.9972	52.4378	52.4649	51.7725	52.3542	53.2028
	43.1373	42.4127	40.1534	39.6447	40.7486	40.4381	38.4973	38.9846	39.4217	38.0305	38.419	39.3549	40.0115	39.9133	59.6832	64.7723	65.393	65.7231	66.1452	68.2465	68.0722	70.0244	70.5062	70.9622	73.8116	75.6034	76.4781	73.9613	71.7166	72.8719	73.5591	75.9911	76.2027	76.8567	75.9138	77.7169	77.5199	77.4956	76.4751	75.8772	76.0513	75.0978	74.3092	72.359	70.5601	69.9467	69.6268	70.0906	71.0463
	27.292	26.5147	24.7675	23.6463	25.6261	24.8606	23.1986	23.9067	23.7361	23.4918	23.6076	24.5787	24.6447	24.7739	25.2151	31.7472	31.9334	32.2772	33.0568	34.3634	35.4926	36.7699	37.3928	38.4376	41.4026	43.0871	43.5666	42.397	40.4785	42.2641	43.3207	45.1809	46.6421	47.0456	47.065	48.8676	48.6401	48.3286	48.5419	49.0262	48.1713	48.4438	47.2315	45.8285	45.3632	45.6254	46.1872	46.1427	46.695
	37.2125	36.2486	34.744	33.5573	35.787	35.1541	33.3109	33.7569	33.9358	33.1635	33.0622	34.0856	35.0708	34.7756	28.9619	34.7841	35.4716	35.7339	36.1786	37.4082	38.1578	39.5597	40.3252	41.5349	44.1594	46.1512	46.4638	45.5263	43.6676	45.2625	46.4052	48.3397	49.1322	50.5405	50.7659	52.5406	52.4195	52.5312	52.6294	53.6777	52.8157	53.1723	51.8667	51.3045	50.7071	50.6402	51.2287	51.0055	51.7228
	19.294	18.1894	16.735	15.7267	17.7656	17.2314	15.5948	16.1995	16.5298	16.6144	16.3331	17.1798	17.5738	17.8287	27.5281	32.2744	32.6746	32.0403	32.8527	33.1072	33.7312	34.6586	35.8393	36.2155	38.385	39.3157	39.594	37.9446	35.891	36.3857	36.4296	37.8497	38.3387	39.2425	38.1011	39.1649	38.4262	38.0742	37.2645	37.3567	36.8776	36.2984	35.2413	33.9931	33.255	32.7976	32.7766	32.5016	33.5472
	22.5825	22.19	20.5712	19.6773	21.6224	20.891	19.5148	19.7633	20.485	20.3036	19.8364	21.2317	21.4847	21.295	33.9092	39.1905	38.9951	38.4785	38.9318	39.4115	40.214	40.5109	40.9756	41.1078	44.002	45.5196	45.5453	44.1942	41.4444	42.2787	42.427	43.6688	44.448	44.7666	43.64	44.9287	44.2807	43.7615	43.6182	43.3312	41.8406	42.1674	40.9176	39.1275	38.5995	38.2281	38.4895	38.0666	38.6358
	30.1822	28.889	27.5684	26.9055	28.0983	27.5683	26.4438	26.3958	26.3145	26.1014	26.5011	26.5652	27.2235	26.9403	51.9331	58.0294	58.8213	57.7738	58.5964	58.9885	59.2551	61.3349	61.0124	61.8587	64.2887	66.1845	66.21	64.0883	61.6264	62.7851	62.4825	64.732	65.406	65.7492	64.5571	66.4024	65.8281	65.0019	64.6809	65.0321	63.2262	62.8847	61.5363	59.9488	59.021	58.3302	58.3969	58.2601	58.8
	34.2666	30.3028	31.0825	32.6965	33.6566	32.4875	31.8404	31.6469	30.6954	30.4552	31.0339	30.9593	32.8144	33.0155	31.8739	32.8337	33.2942	32.7319	31.2634	30.7237	30.3029	31.5696	33.0165	32.1546	33.1947	31.6241	32.7293	34.5001	36.1101	45.2876	48.5831	49.959	51.3133	51.2186	51.9374	54.4477	57.0299	60.9619	63.3364	65.3954	68.5652	69.9099	68.8611	69.9253	72.2905	75.9506	79.7547	83.3421	84.1982
	45.6547	40.3331	42.0088	44.1883	44.8994	44.1027	41.0866	41.4172	41.4288	41.0089	40.5713	40.6359	43.1076	43.9635	42.9891	43.265	43.8139	42.3955	41.8578	40.2946	40.7773	42.0047	42.7126	42.8934	43.3061	42.5344	44.6719	48.3765	50.814	59.4592	63.5858	66.45	67.7036	66.8391	66.147	68.9055	70.4341	74.5687	76.8051	78.6898	81.1463	81.2868	79.9554	79.9383	82.635	84.9975	88.3746	90.0484	89.8871
	48.6675	43.0393	43.8899	45.8846	44.7646	45.129	43.2982	43.5302	42.3806	42.4155	41.2701	42.7081	44.7974	44.8199	43.8345	44.1866	43.8604	44.2848	42.7736	41.987	42.0957	43.4003	44.0984	43.8686	43.6292	41.4455	42.5989	44.4296	45.9903	52.9972	57.6665	59.4901	59.6275	59.0176	60.596	63.2362	66.7379	70.6504	74.4878	76.3348	79.6714	80.881	80.1332	82.3849	83.9448	88.6764	91.5022	93.9036	94.5343
	53.4613	48.606	49.405	50.7138	51.5975	50.579	48.7014	48.4898	47.6967	47.8947	47.2103	47.9127	50.1907	49.4595	49.0214	49.0678	49.5895	48.6029	47.7114	46.5234	46.6218	47.8818	48.6343	48.7748	47.991	47.3037	49.6751	51.9596	55.0663	58.8401	63.1418	66.422	67.224	67.4562	69.1414	71.0372	75.5318	79.7511	82.4981	84.9226	87.8394	88.4308	87.4517	87.7965	89.7271	93.5321	96.5072	97.8717	97.0496
	39.8543	35.4611	36.6541	37.3193	38.6932	37.9412	36.7564	36.0216	36.3434	35.9516	36.2431	35.8231	38.514	38.2222	36.4413	37.4464	38.0503	35.9796	35.8764	34.5404	34.475	35.8137	36.4111	36.049	36.4175	38.8982	40.0431	42.5202	44.6558	79.5648	85.1475	88.2475	90.3324	92.0705	91.1051	94.8877	98.5808	103.019	106.705	108.16	111.247	112.924	113.406	113.638	116.529	122.194	125.44	129.488	129.397
	48.8929	44.8055	46.3702	47.4141	48.3631	47.6512	46.1479	46.021	45.2193	45.5064	45.3214	45.2603	47.0205	47.1117	46.1779	46.4961	46.3492	45.7521	43.8272	43.2464	43.8221	44.8322	45.4808	45.3984	45.1913	45.4176	46.7801	50.1914	52.3862	57.4046	61.7649	64.0483	64.6369	63.4992	63.1848	64.6295	66.8764	69.6416	70.8962	71.2781	73.2185	72.2557	70.1387	69.7363	70.4493	73.3612	76.2574	76.4088	76.3062
	62.8269	59.4377	61.131	62.2301	61.7107	62.368	58.525	59.7217	58.3282	59.222	58.5377	59.3148	61.1172	61.8225	60.2162	60.7074	61.1383	60.3517	58.9077	57.1178	58.0179	57.7723	59.1758	60.8311	59.3865	57.3149	59.1439	62.2312	65.8448	78.1119	82.1749	84.5318	84.2263	84.4645	84.9111	84.9205	87.8668	89.5564	91.3785	92.0308	93.9581	93.0107	92.075	91.5418	92.0439	95.4083	96.5175	98.2467	96.6309
	37.5547	35.3322	35.5621	36.0678	37.2907	36.8863	35.1084	35.3151	34.4171	35.1527	34.5863	34.9333	37.2209	37.4874	36.573	36.6577	37.3479	36.5148	35.5809	34.6504	34.9344	36.0112	35.8412	37.3044	36.7971	35.376	36.2507	38.2917	40.5018	62.8704	64.8629	67.5937	68.3702	69.6514	68.0077	70.1811	73.0909	76.2943	79.3841	80.5735	83.2098	83.662	82.0831	82.2644	83.5599	87.6256	89.4322	91.4904	93.2029
	19.5659	16.4815	17.4163	17.9021	18.9158	17.9562	16.8272	16.7985	16.2287	16.0145	15.5866	16.6537	18.6794	18.3248	17.0795	17.8844	18.0694	17.5412	17.1497	15.7162	15.4293	17.1234	17.8206	17.5121	17.7876	15.8301	17.8383	19.6926	21.1322	60.5059	65.354	67.4723	68.1655	69.5673	66.3017	70.4251	73.625	76.5884	79.3017	79.8841	82.7612	81.7799	81.8634	82.022	82.7711	87.2284	89.2039	90.6675	90.4153
	57.5956	51.6313	54.487	53.8686	54.3914	53.5594	52.6823	52.1082	50.9182	51.4526	50.528	50.4013	53.0208	53.3491	51.5838	52.4383	52.7402	51.7658	50.2933	48.4134	48.9182	50.7713	50.607	50.6799	51.028	50.5768	53.1706	55.572	59.1428	73.6698	78.3014	81.094	82.7535	81.8239	82.6105	83.0893	86.0652	88.8802	89.3494	91.6294	93.0149	92.9886	91.7393	90.6526	91.9888	95.4389	98.0744	99.6595	97.2276
	26.7702	22.6414	23.2546	25.0436	25.4933	24.7933	23.084	23.3903	22.5448	21.7747	22.8656	22.1349	24.9456	24.7667	24.3454	24.9168	24.8136	24.6971	23.8934	22.4571	22.7526	24.3058	25.0887	25.6938	25.0841	26.7667	29.1197	30.9137	33.4336	66.6483	72.2042	74.826	77.1685	77.9185	77.2664	80.6696	85.5205	89.1832	91.2573	94.4313	98.1639	96.875	96.5848	98.3604	99.903	103.76	107.398	110.093	110.342
	22.8141	18.3026	19.1744	19.9389	20.9157	20.398	18.9207	18.9576	17.8425	18.0735	18.3471	18.8526	20.9384	21.099	20.2023	20.8124	21.1871	20.1632	18.8335	17.9471	18.799	19.8834	19.9565	19.7045	20.1118	18.7434	20.6759	22.1483	23.9822	26.4848	29.7932	31.8637	32.0998	32.0444	32.2765	34.1217	36.4964	39.0255	41.2896	42.9656	44.794	45.6416	45.1906	46.032	47.9949	51.8247	54.2121	56.5603	56.4246
	13.8649	9.91544	10.2904	11.1903	11.8728	11.2446	10.4204	9.72032	9.08431	8.8443	9.24784	8.94916	11.1444	12.0545	10.6875	11.2995	11.4865	11.6349	9.71358	9.23126	8.99564	10.6289	10.8151	11.6877	11.3311	9.89926	11.2126	12.9783	14.3779	19.476	23.1406	24.6154	25.0024	25.1478	25.9514	27.538	30.1117	33.4135	35.5173	37.4601	39.1029	39.3681	38.9659	38.7113	40.1223	44.4906	46.7423	48.9318	49.0655
	15.6627	11.2367	12.3452	13.0546	13.1228	12.8977	10.9982	10.988	10.1183	10.7331	10.5015	10.667	12.1551	12.2863	11.4112	11.95	11.89	11.7817	10.8431	10.2175	10.0343	10.4713	11.5022	11.6506	11.0125	9.90029	11.1697	12.1503	14.6037	14.9926	17.505	19.2797	19.1058	19.0625	19.2271	20.1092	22.5855	24.7918	25.9203	28.1273	29.0922	29.3428	28.4637	28.7771	30.0903	32.9833	35.3004	36.9544	37.0421
	17.0568	12.5018	14.1485	14.6175	15.4682	15.0134	13.6451	13.4136	13.2271	13.4529	13.1072	13.3395	15.5816	15.9197	14.7632	15.4689	15.6325	15.0937	14.4382	12.5657	13.0388	14.1439	15.6306	16.3309	16.1261	14.3829	15.5899	16.9269	18.2342	14.7984	17.879	18.7618	18.7131	17.6458	17.2842	18.3845	19.8692	22.2683	24.0974	24.9577	27.5458	26.864	26.0871	26.0735	27.9324	30.8108	33.6669	35.211	36.1233
	23.786	19.8717	20.983	21.5715	22.4141	22.0716	20.5215	20.8235	19.6985	20.033	19.3076	19.9838	22.4635	22.9948	21.2948	22.5347	22.6396	21.9247	21.0161	20.5114	20.2928	21.2668	22.1097	22.0509	21.644	20.4188	21.2826	23.1329	25.0321	27.0607	30.3272	31.1812	32.2745	32.2659	32.9703	34.0308	36.7492	39.5615	41.7065	43.8977	45.7995	47.1025	45.7493	46.0592	48.4064	51.6456	53.8715	55.9845	55.3742
	29.2979	25.8273	26.5984	28.0065	28.2053	27.7202	25.7838	25.8929	26.3264	25.0675	25.3975	26.0348	28.6795	28.7762	28.3982	27.488	28.1232	27.3922	27.6566	27.661	28.7557	30.4584	32.0714	31.7279	31.9193	29.6105	31.3822	32.7181	34.3187	32.7513	35.4911	36.2568	36.6041	36.0738	36.4479	37.1082	39.3875	41.4415	42.2709	43.881	45.3027	45.62	44.2657	44.2767	46.0025	49.8343	51.9741	53.901	54.3356
	36.4568	31.9058	32.7806	33.9095	34.63	34.1627	31.9007	31.2832	30.9847	30.7961	30.6669	30.7446	32.7682	33.1444	32.1709	32.6207	32.4093	31.9822	30.5637	30.2764	29.7811	30.8285	31.4981	31.6105	31.6617	28.6287	30.0853	30.8011	32.4763	34.4818	37.826	38.6975	38.8036	38.5118	38.4131	40.0441	42.2427	44.8669	45.9341	47.7078	50.2316	51.0574	49.8151	50.2998	52.6124	55.8393	58.6139	59.8991	60.6165
	31.9804	28.0783	28.3346	29.7121	31.1081	30.0248	27.7896	28.4451	28.0225	27.6132	26.8687	27.5047	30.2472	29.7414	28.6855	29.6467	29.6879	29.0289	28.3044	26.8568	27.4107	27.9326	28.3879	28.4388	29.0154	27.269	28.3686	29.5253	32.0949	47.1482	51.166	53.1017	53.6923	54.324	53.8748	56.1612	59.6963	63.1351	64.704	66.9348	69.7293	69.8154	69.3328	69.1287	71.4155	75.2855	77.4022	80.0817	79.9251
	31.8547	28.0579	29.2011	30.6483	31.1303	29.915	28.5894	28.5631	28.4539	27.5868	27.628	27.6395	29.9509	30.163	28.9942	29.4871	29.8556	28.8891	27.8156	27.2239	26.5296	27.7238	28.2099	28.9904	28.2242	26.0964	27.0498	28.7644	30.1972	34.0467	36.3947	38.2858	38.4097	37.5622	39.0642	39.6946	42.2956	45.5239	47.3414	48.5352	50.528	52.363	51.4369	50.0634	52.997	56.0318	58.9687	60.9924	61.5784
	42.5998	38.9236	40.1786	41.5045	42.0111	40.7118	38.719	39.7146	38.5852	39.2172	38.401	38.5413	40.6842	41.0085	39.6814	41.0355	41.1682	40.4554	39.8537	38.3335	39.22	39.9352	41.2339	40.6023	41.0349	39.3997	41.7213	43.2739	46.3799	53.2823	57.5157	58.9151	60.9603	61.6463	63.1038	65.4481	70.675	74.0584	77.1559	80.5379	84.9147	86.0469	85.7795	86.7026	89.4608	94.3468	97.2471	100.111	99.8501
	40.0542	36.8405	37.3102	38.5876	38.8838	38.5403	35.9873	36.6321	35.3442	35.4834	35.5935	35.0435	37.606	37.6398	36.2643	36.795	36.8149	36.5313	35.1766	34.085	34.0374	34.538	35.3116	35.291	35.581	33.6014	34.885	36.6159	39.615	49.2672	53.0973	57.1868	58.2962	58.3764	58.6194	61.6224	63.8927	67.9022	70.0934	72.1573	75.3823	75.5277	75.7879	76.279	77.3517	81.2411	85.0551	87.3132	86.2655
[truncated: 180 more rows]
[truncated: 275 more columns]
