# Supplementary material for: Regulation of store-operated Ca2+ entry by IP3 receptors independent of their ability to release Ca2+
Source: eLife journal article supplement (doi:10.7554/elife.80447), 2023-07-19
Supplement: fig2-figsupp1-data1 [file Figure 2- figure supplement 1- data 1.xlsx]

## Sheet: Panel A
NS shRNA	38.1778	38.9943	37.5877	39.1915	39.7652	35.894	38.3145	40.051	37.2823	39.118	35.6278	36.7257	36.1562	33.2666	34.0504	33.2172	32.7154	32.6467	35.8073	32.9319	33.9437	34.1759	33.213	34.0014	50.1123	50.6896	52.3941	52.2103	48.2485	44.1208	47.4038	45.8651	44.6745	42.8895	38.7667	40.1559	37.0483	39.0743	39.1487	38.9456	37.8149	42.2485	42.939	47.318	44.3053	44.5446	48.9476	42.7922	43.2297
	17.8519	17.6252	18.5132	18.5277	17.8848	16.8933	17.0779	17.5595	15.3358	15.4273	13.2437	13.1455	14.3116	12.2007	12.8745	12.1893	10.6016	11.6956	13.1736	10.2438	12.1736	10.5439	10.6268	11.9201	156	138.603	149.243	150.391	133.035	122.063	138.65	122.161	111.345	120.838	107.864	94.1723	76.1575	89.8457	101.639	84.1714	73.6949	76.2918	73.7093	81.5737	66.9542	64.2632	60.1759	56.039	61.2009
	67.5557	67.4744	68.4375	68.7345	67.4481	65.1154	69.746	68.5566	65.9646	68.2307	64.404	65.3295	66.4939	63.6109	64.0459	64.2112	63.2802	63.6208	64.4111	62.5699	65.6849	63.3373	63.4776	67.4563	86.5349	86.0285	85.9153	84.6411	81.5083	79.0494	78.3293	78.4191	77.3742	71.2085	68.9398	71.4613	66.127	66.7398	61.9387	59.761	61.7748	61.6477	61.6364	60.741	60.2774	57.7807	61.8492	56.7098	58.5375
	63.4897	62.414	63.6941	62.6169	63.464	60.3162	63.3514	62.0681	59.9415	60.1034	57.8924	56.9603	55.441	55.3733	54.9578	55.4897	55.7415	55.4164	55.1307	52.5886	54.9154	53.1053	50.8768	51.5529	106.644	105.648	104.209	99.6759	95.6413	91.1549	90.3511	89.3468	85.5041	80.5411	80.0964	80.1338	74.4397	72.414	67.7057	68.6857	67.211	66.6217	64.0845	65.8004	63.1081	61.4412	64.8342	59.58	59.2873
	58.6861	56.8042	55.759	58.554	58.421	54.0311	55.868	57.4032	54.7074	54.2612	52.6357	53.656	53.788	52.915	52.5764	52.8053	51.6018	51.837	53.4976	52.35	53.5446	49.514	50.4777	50.5773	436.042	400.85	372.154	339.161	310.624	279.629	259.302	256.153	241.531	216.41	207.917	205.416	182.429	176.707	156.049	152.437	149.827	142.794	137.58	131.254	125.24	118.497	115.64	109.613	107.338
	35.2833	35.2965	34.5653	35.2675	36.7129	34.8659	34.5012	34.7562	34.8298	34.5596	32.8895	33.2148	32.5334	32.5769	31.5362	31.3052	31.1962	29.5181	31.4349	30.8343	30.7805	28.5371	29.7182	29.4675	227.742	208.349	223.458	219.284	191.877	167.887	159.402	187.236	172.318	139.916	130.834	136.586	137.24	133.008	113.21	106.925	114.531	113.065	100.482	94.948	105.161	103.605	98.3932	85.0622	83.3949
	34.2764	35.0274	34.8458	35.5023	34.0809	32.5893	34.5739	32.6821	34.0202	33.9454	32.3878	30.2443	32.6877	28.9545	30.4171	28.9682	29.7505	29.9669	29.7694	29.7659	27.8293	27.7891	28.1594	27.3567	88.0987	97.0214	118.47	117.948	108.258	94.5254	90.17	93.3745	87.2703	75.7528	68.4616	76.4497	72.6588	71.2011	63.6617	54.0509	54.3298	52.3136	47.8198	48.8168	48.4369	46.2655	47.3948	46.2626	45.2666
	35.9697	34.3974	34.2122	36.7592	36.1255	33.3234	35.8841	36.6789	35.1254	34.4766	31.9288	33.9267	31.4346	31.5352	31.3414	31.4676	30.0688	30.9019	32.8602	28.9677	30.8831	26.8481	28.3705	28.3458	182.461	170.114	160.721	148.589	144.553	153.045	144.855	134.932	121.806	107.453	104.381	107.689	104.286	100.557	87.385	76.4922	74.3191	61.7181	61.4616	63.2872	73.9677	69.632	61.2481	52.0526	51.5406
	39.1714	38.46	38.9071	38.898	39.8672	36.1523	37.8725	39.8484	39.0888	39.2954	36.1975	37.3091	36.9683	34.369	35.5042	35.469	34.6457	34.5576	36.2465	32.4233	35.081	33.4018	34.4305	33.0649	86.885	89.2345	84.3202	79.9197	75.0505	75.4891	69.4321	66.6277	64.1378	58.6485	55.2614	56.5587	53.9033	50.4905	48.0887	42.3194	42.0291	41.7432	40.9797	41.4296	40.7991	39.3226	40.1197	35.5133	36.089
	78.0845	76.5451	77.5414	76.2577	77.5425	74.5097	76.1151	78.3972	75.7129	77.2368	73.1719	74.8631	73.8074	71.8028	72.6248	74.5233	72.1445	73.1828	73.9049	71.7205	72.9671	73.0923	70.6656	72.4048	288.71	253.82	247.968	227.41	224.787	202.694	232.846	202.454	194.567	188.834	203.198	180.828	157.179	147.577	134.028	119.714	132.498	120.353	116.35	105.195	95.2923	94.4113	90.593	86.4575	86.7774
	61.3825	61.0339	60.6315	60.5109	62.8299	58.9032	62.3655	62.3229	60.2009	61.2381	59.2349	59.5718	57.7424	57.9954	57.494	59.0029	57.3777	58.3374	60.227	57.5039	58.258	56.6479	55.5958	54.612	155.334	154.039	138.903	136.109	127.376	121.884	127.291	112.371	112.842	118.817	113.671	111.16	103.675	96.3988	96.2353	86.9196	83.9985	79.3306	74.39	73.7119	65.9784	64.6146	71.6024	66.5896	65.8149
	77.1495	78.43	77.4505	77.2694	78.1607	74.3999	78.4237	78.4604	78.7245	78.724	75.3077	74.9406	74.7088	74.6843	73.9454	75.9199	73.3859	72.8378	74.2285	75.0617	77.6249	75.4501	74.7484	74.7688	142.926	144.879	144.248	145.876	138.728	131.247	132.441	126.294	122.575	117.708	105.891	108.479	102.809	106.476	101.903	95.5846	98.5734	95.5526	93.6351	95.7575	87.2593	85.8964	87.1146	80.9208	80.6143
	89.401	87.9252	87.3805	89.1034	89.8603	89.5879	88.9319	87.802	89.0945	91.3859	85.9651	86.3165	87.4384	84.8576	88.2087	86.9117	84.9569	84.7716	87.2213	84.1004	86.5077	85.4235	85.0723	87.2708	306.581	304.028	284.617	297.473	277.417	258.752	232.614	243.055	233.416	204.226	198.746	200.417	191.384	178.404	176.936	162.812	191.902	163.604	158.714	148.27	135.282	127.718	132.661	134.927	114.387
	51.5014	50.6307	51.8042	51.5602	53.6727	50.1189	50.4628	51.1679	49.4751	50.3777	48.4568	49.0861	48.1565	46.3073	46.0657	54.5326	43.6841	45.9812	46.1566	44.0189	45.5134	44.2535	45.1199	44.7852	524.242	485.994	452.132	409.8	377.677	349.081	324.26	311.035	286.317	261.718	249.707	247.408	220.467	204.496	186.191	183.572	178.111	168.865	159.028	157.833	140.822	133.908	134.25	121.265	114.5
	42.3044	42.5263	42.1554	42.0422	42.1967	39.8983	40.8924	42.7628	39.851	41.7141	38.1304	39.4011	38.4377	37.3841	37.4014	36.231	38.092	36.8474	38.1483	36.7906	38.438	36.8343	36.5737	36.8934	339.156	333.425	320.227	306.818	289.752	270.144	241.175	245.198	257.664	237.153	232.804	216.086	203.139	206.818	212.066	208.78	209.887	192.15	179.808	199.088	198.879	171.327	170.14	179.808	183.921
	38.0531	38.466	37.7774	37.9428	38.3585	35.176	39.7756	37.9857	37.3503	36.0152	34.3043	35.529	35.1372	33.1633	34.2551	33.6263	33.2376	32.4015	33.5641	33.0157	33.0335	30.9767	31.9901	31.0103	67.1047	65.5096	64.8654	64.159	61.9847	57.7456	57.8681	57.0314	56.4789	53.1235	49.9392	50.3771	46.9746	47.2791	44.7666	41.8852	44.6478	43.9221	41.878	45.2141	40.2205	38.5292	42.1315	37.9983	40.5448
	53.4777	53.4258	52.8754	53.306	53.9619	51.8499	55.0066	51.4357	53.3405	53.1903	50.4781	49.1539	49.8492	47.5593	48.365	48.7116	47.2069	47.6441	49.0611	47.2267	48.5686	47.8164	48.5067	46.6618	219.521	233.458	239.99	223.297	220.477	204.839	208.139	191.905	187.743	183.836	170.125	155.654	142.403	142.752	144.066	137.078	129.5	130.053	119.411	118.372	106.488	108.923	101.657	97.1755	109.05
	55.1558	55.4925	56.1486	55.3194	56.0454	52.7705	54.787	56.229	54.7122	55.1009	51.9567	53.7677	52.8201	51.9571	52.0518	52.9092	50.7462	50.2407	51.7752	50.5678	52.0393	50.6813	50.2733	50.6659	136.605	130.356	122.356	117.004	110.151	100.866	98.6238	100.485	96.3874	90.451	85.6342	86.0076	82.2271	80.3265	79.6924	75.3472	77.2564	75.6016	78.1561	77.379	73.1979	69.6531	71.5842	66.0192	65.1888
	53.1932	53.5977	53.9832	54.7936	56.279	53.0817	53.0409	52.7924	51.7561	53.1825	49.7944	50.861	50.3271	48.043	47.3615	49.8964	48.7542	49.2866	50.0513	47.7781	51.2406	49.7316	49.7974	49.369	195.769	189.446	187.421	207.874	168.994	169.256	183.744	155.532	130.672	131.875	139.888	124.761	115.322	100.278	110.711	98.7025	120.37	109.082	95.5945	91.6499	83.2117	83.0371	93.7451	85.0634	74.6223
	89.4034	90.1556	90.9765	91.192	91.2731	88.2091	92.9704	90.2824	89.1651	89.4125	83.6706	86.2225	84.0157	83.6219	84.4643	85.7148	84.0486	83.653	83.6985	82.742	83.2312	83.1044	81.15	82.0535	503.214	475.846	478.628	440.065	385.545	369.885	319.309	318.073	288.763	249.947	244.676	248.641	223.7	207.443	200.577	183.829	171.806	177.164	165.62	164.785	160.265	143.071	141.166	138.642	135.865
	87.1293	84.2318	86.3347	89.4986	85.2086	85.2455	86.7879	86.3535	85.4669	87.0076	83.9578	84.6537	83.437	82.3358	85.1514	85.9147	82.3686	83.7857	86.0455	82.4251	83.5782	81.0445	82.8432	82.7275	210.545	252.844	252.486	249.308	245.819	253.704	230.556	227.632	223.957	214.26	210.223	201.22	169.816	174.047	158.115	176.228	168.437	139.464	144.883	153.828	130.132	125.59	123.438	120.047	134.622
	120.096	118.485	122.567	121.251	119.328	117.99	123.373	121.442	117.611	120.629	117.759	117.515	118.26	115.659	118.008	118.432	115.722	116.74	121.329	114.131	117.16	116.32	116.917	116.908	423.625	485.279	448.234	420.653	401.789	366.97	343.057	328.719	336.644	277.024	261.562	259.877	262.656	238.265	229.444	212.951	218.343	222.332	206.42	199.776	195.548	183.329	176.691	178.628	173.986
	59.3703	59.5383	59.0049	59.9555	58.8857	56.376	59.3892	58.3775	57.1955	57.1855	56.0841	57.0129	55.2967	54.9155	55.1938	53.0818	53.9523	52.753	54.9694	52.3056	54.9549	52.1251	52.5195	51.2979	647.981	532.502	470.461	461.023	450.188	420.75	382.091	354.312	319.069	294.501	285.56	278.841	249.64	243.504	235.645	230.216	217.886	216.731	210.77	207.094	194.854	191.524	187.616	169.248	164.464
	16.1051	18.8695	19.8811	22.6297	22.9505	20.9002	21.2083	22.5797	22.1509	21.7702	21.3779	20.5224	19.9685	19.6418	19.4437	18.6651	17.8831	17.4118	16.6756	15.8081	15.461	15.6221	15.2457	119.166	108.949	105.864	108.721	104.171	99.1194	97.6507	95.8978	95.2048	92.6747	90.3219	88.4616	85.6744	82.6361	82.0848	81.1518	80.3266	76.8784	74.2109	71.4938	71.0564	69.0026	65.8654	63.9763	64.8009	63.7095
	12.6849	15.3962	16.3882	19.2065	19.7821	17.2665	17.6991	19.8539	19.1595	19.0704	18.0917	18.0889	17.6857	17.2786	16.8678	16.791	15.8599	15.4872	14.8521	14.3243	14.2725	14.5635	14.4634	76.5133	125.924	118.022	117.692	120.558	117.238	113.992	112.453	108.522	106.539	102.505	97.9546	100.479	93.5021	93.0184	89.0519	87.4239	83.9738	80.1402	75.2895	76.1991	74.9836	73.3618	67.7437	65.7152	63.675
	28.7908	32.1343	33.5573	35.9252	35.8679	33.6484	34.0976	36.221	35.4962	35.0621	34.696	34.778	33.72	33.0467	33.2724	32.8051	31.3623	31.4905	30.2864	29.5039	28.9951	28.0561	29.5125	46.8625	53.4535	55.721	56.0963	55.5868	55.0614	53.5917	52.9988	52.6167	52.7303	51.932	51.6028	50.7825	50.0117	50.5253	49.8986	50.2194	49.3556	47.6993	46.3354	46.961	44.9865	44.0975	43.8549	42.9598	43.1596
	31.7896	34.8565	36.6315	38.6052	38.9209	36.9699	36.255	38.8185	38.3993	38.8054	38.2309	38.8761	37.161	36.2508	36.6691	36.1012	34.7938	34.1511	33.5908	32.8344	33.3993	33.3889	32.8268	46.5976	51.9912	54.8489	55.1029	53.9852	53.2585	52.941	53.1393	51.5601	52.091	52.237	52.4313	52.8412	52.0626	52.6313	52.5794	52.2294	51.7522	51.0502	50.0242	50.2237	48.3063	47.5113	47.1417	46.5299	45.7441
	35.1568	38.1385	39.6129	42.6278	42.3162	40.1637	39.6618	42.2171	41.3782	41.7135	40.4712	39.0828	38.8844	38.9874	38.0308	37.7929	37.1853	36.3649	35.7973	34.7637	34.8756	35.4921	35.2208	108.154	106.808	109.111	110.367	110.443	108.851	107.883	105.218	103.001	100.693	101.097	99.4694	97.9825	95.899	95.7537	93.6649	92.6496	91.3111	88.2921	85.0155	83.6796	81.6073	81.2747	78.9329	78.1428	76.3233
	26.3348	29.3585	31.5633	34.4775	34.3281	32.1938	32.0694	34.2431	34.2172	33.5145	33.0188	32.8919	32.1224	32.3301	31.5901	31.6287	31.3658	30.0141	29.8785	29.5994	29.7222	28.8512	28.8201	122.686	119.956	122.265	125.083	124.05	120.336	117.145	113.978	114.128	108.829	109.074	105.485	104.188	99.4453	99.0349	96.2978	95.3364	90.5847	88.4508	85.6838	83.1253	80.9299	79.484	77.5542	75.0596	73.2859
	16.3477	18.353	20.2555	22.8517	23.4112	20.5212	21.7809	23.4596	22.3178	22.3963	22.2067	21.7342	20.808	20.6445	20.5901	20.5856	18.8211	18.9095	18.2077	17.6527	17.5165	18.2943	17.9395	112.027	155.885	189.745	183.169	172.149	167.832	165.45	166.66	159.634	147.962	145.067	147.61	137.646	131.861	131.878	129.346	123.543	121.507	115.525	110.468	110.989	108.36	106.119	100.579	97.1036	93.7837
	18.4765	20.628	22.4817	24.8216	25.5113	23.3824	23.5524	24.9165	25.4995	24.8601	24.4035	23.8772	23.3804	23.3029	22.946	22.1145	21.6405	21.4193	20.8299	19.7989	19.6652	20.1555	19.881	50.1867	63.0269	95.1295	124.608	120.718	111.227	106.245	110.677	110.194	104.039	108.816	103.782	96.7511	97.4329	100.263	93.9587	86.9802	83.8796	85.3852	84.1152	81.0705	77.1945	73.7781	68.8731	63.7728	61.3524
	17.3394	20.8038	22.0935	24.4481	25.4615	22.2857	23.0689	24.997	24.8125	24.835	24.5367	24.6079	23.276	23.8175	22.6692	22.7917	22.1109	21.5578	21.3627	20.5726	20.7165	20.4969	20.953	72.5601	87.4681	96.1946	97.059	91.6602	86.932	84.886	85.4934	85.1738	82.5713	82.183	81.2196	76.812	75.6894	76.0485	73.4504	71.1519	70.5676	69.3408	66.3481	65.945	64.8421	61.666	60.3706	58.0147	57.2365
	18.4276	20.5709	22.1066	25.6947	25.7634	23.3763	23.7927	25.6097	25.3186	24.7694	24.1952	24.164	23.1597	23.9668	23.3648	23.1151	22.3294	21.6775	20.8414	19.7878	19.7841	20.2594	20.3484	114.349	148.604	172.217	161.396	145.712	136.637	140.674	147.615	140.456	130.371	124.924	129.878	123.565	114.768	117.919	113.484	109.919	107.173	102.981	100.171	100.468	96.9244	94.1093	98.5774	87.4333	88.156
	6.73727	3.27644	3.12713	2.67758	2.515	2.4926	2.56966	1.40686	3.32224	3.65868	3.3651	3.1117	3.83829	3.75521	4.3499	4.21287	4.23087	4.44456	4.36736	4.71088	4.29273	4.46888	4.6604	4.64217	37.3182	41.1673	42.9291	43.0938	43.4499	42.8505	42.0902	41.0772	40.5613	39.0742	38.7071	38.5103	37.9334	36.5882	34.8347	33.4597	32.7686	31.4089	30.1847	28.9267	28.2914	26.4355	25.5587	24.8952	24.3933
	6.91178	3.33565	2.96902	2.29077	2.42757	2.53437	2.5102	1.12101	3.07653	3.18356	2.94506	2.82217	3.33114	3.27841	4.1875	4.00277	3.86505	4.1956	4.1434	3.87613	4.59922	4.58375	4.54541	4.00837	71.6869	88.8604	96.6858	93.8535	95.3661	94.5281	93.5244	91.9291	89.9144	85.7851	84.8103	82.4213	79.2412	76.8416	73.3024	68.91	66.6555	62.5341	60.2487	56.73	53.5435	50.9663	48.68	46.1206	44.7896
	13.5161	8.74949	8.49145	8.29459	7.59985	7.5967	7.90442	5.72676	7.71169	8.11955	7.82483	7.91076	8.11434	8.3538	8.44503	8.68578	8.69501	8.79393	8.50705	8.24819	9.20095	9.16792	9.23849	8.97999	429.142	500.516	470.552	440.18	421.889	384.222	351.525	328.424	300.719	276.346	254.684	238.265	223.501	208.617	192.93	182.478	173.419	162.455	151.648	145.084	136.983	131.5	124.74	118.307	112.638
	13.9185	10.3343	8.71983	8.19469	8.66469	8.07097	8.79279	6.83197	8.99025	9.01613	8.27733	8.12063	8.75961	9.05735	9.17146	9.48717	9.1487	9.57047	9.09758	9.56951	9.35701	9.00242	9.1792	9.08097	169.272	155.963	134.546	124.859	136.436	140.026	132.097	136.054	138.683	131.423	129.007	126.823	120.152	118.84	113.4	110.441	109.005	106.558	101.468	98.1815	100.182	97.2815	92.0574	89.7308	85.7959
	17.0978	12.901	11.7275	10.9198	11.0811	12.2867	11.6714	10.1469	12.5304	11.9267	11.6073	11.5577	11.8622	12.6967	13.1128	13.1964	12.7554	13.8684	13.195	12.5695	12.6592	13.0355	13.2089	12.1272	129.593	134.405	115.221	120.164	126.958	122.264	116.198	118.304	118.534	113.025	117.473	110.556	108.77	102.475	105.621	104.731	101.583	94.1519	90.4661	82.5999	96.5052	87.5302	79.5594	78.4407	79.4947
	22.5761	19.7948	18.6753	18.6595	18.3676	17.987	18.626	17.2817	18.9162	19.0448	18.7799	19.1075	19.1832	19.1899	19.4646	20.1008	19.7923	20.5948	19.6468	19.2433	20.3568	20.6945	21.1164	20.8381	100.048	99.5566	96.2627	98.6548	96.8913	100.839	99.2833	98.9569	99.6571	96.638	98.2431	95.0741	91.1929	94.6172	93.6316	90.717	84.0479	87.2761	83.6704	81.2281	75.4243	72.7938	70.7052	70.0136	75.8483
	14.4122	10.4919	10.3135	9.77338	9.95049	10.1198	10.4898	8.85953	10.353	11.1347	10.478	11.2213	11.3872	11.8858	12.4895	12.0758	12.1493	12.8594	12.5739	12.6085	11.7784	12.6324	12.6645	12.9058	127.921	154.726	145.253	148.651	157.219	141.897	139.595	142.122	137.914	134.035	131.645	127.478	122.849	119.488	114.758	111.361	108.324	101.667	104.126	99.6264	100.469	92.0934	86.959	84.6937	84.3734
	20.4587	15.9169	15.4658	14.226	14.532	15.048	15.6619	13.2196	14.7493	15.8398	15.5705	15.7572	16.4956	16.5158	17.0796	17.1203	16.2781	16.8893	15.6994	17.0322	16.8263	16.7502	17.7505	18.0181	56.7555	128.164	124.304	116.857	114.841	110.959	112.47	111.783	107.303	102.893	98.2454	95.1981	92.2515	88.5856	84.9786	81.5847	77.9067	76.0233	74.5355	71.4134	69.8969	65.841	64.7841	60.4307	59.4352
	24.2362	19.7772	18.5709	18.3907	18.1559	18.6925	18.5171	17.5099	19.2825	18.9841	18.4677	19.0316	18.8127	18.7785	20.0128	18.9439	19.6788	20.0311	19.8815	19.6356	19.3541	20.2687	20.762	20.1274	84.5483	126.052	138.939	152.619	150.843	150.788	150.017	143.819	150.809	139.349	139.752	143.207	134.207	126.911	128.121	118.699	117.18	114.88	113.149	109.255	103.264	101.931	98.8037	96.3746	90.1429
	25.8735	20.0874	19.8067	20.3906	20.0046	20.3141	19.8208	18.252	21.6641	20.7128	20.3507	20.6586	20.7159	20.7204	21.2222	21.1315	20.8908	21.4888	21.1275	21.4229	21.0236	21.9427	21.8399	21.8944	227.33	264.951	242.006	206.847	189.914	199.025	201.893	195.968	189.663	173.519	159.399	150.61	146.808	142.244	133.323	131.532	125.191	121.121	115.644	112.627	105.94	102.483	98.202	96.2044	93.0966
	28.0055	26.1109	25.4954	25.3359	25.6315	24.9019	24.1145	24.3881	24.7938	24.7761	24.0362	24.3426	23.8261	24.3151	24.2495	24.0201	23.8501	22.999	21.8568	22.3903	25.8375	23.3865	23.7666	23.1057	158.94	169.883	165.052	161.918	156.857	152.736	151.825	148.669	147.817	148.716	149.3	146.795	143.654	139.498	133.454	130.484	127.477	122.605	117.034	114.807	113.329	110.963	106.201	104.342	101.832
	30.6554	28.6373	27.8386	27.5968	27.8839	27.3487	27.2484	27.1901	27.4385	27.4312	26.3892	26.1149	25.8217	25.9907	25.7239	25.1696	25.036	24.2682	22.9041	23.4674	28.2884	25.373	25.5725	24.7453	127.537	116.056	101.051	86.7545	75.543	67.7982	63.2194	60.9738	61.3479	67.5545	83.357	83.8737	77.4173	73.1625	70.2181	69.8734	73.8996	73.775	70.8991	72.2263	72.4108	68.9861	65.948	70.6901	75.8654
	31.735	29.8513	29.2309	29.1806	29.0249	28.6331	28.2993	28.2556	28.4889	28.3437	27.8345	27.4421	26.968	27.232	27.3655	26.8255	26.8032	25.5239	24.51	24.8012	29.389	26.518	26.6369	25.8403	31.4335	32.1437	32.5387	32.8368	33.8177	34.8689	36.6341	37.8357	37.9658	39.5958	41.4	42.367	43.1244	44.4692	44.0851	45.2816	47.1478	48.244	47.9492	48.7414	50.4147	50.8101	50.8563	51.547	51.2047
	28.2038	26.3909	25.6294	24.9484	25.4103	25.0868	24.8423	24.8779	25.1581	25.3462	24.1514	23.913	23.3566	23.7547	23.5391	23.5984	23.3141	22.9501	21.1659	21.7856	26.5296	23.4868	23.6844	23.094	399.493	283.517	203.487	152.685	120.894	99.7506	87.6082	78.8607	76.749	80.7238	102.143	130.184	134.614	126.965	115.229	116.054	118.3	122.546	127.787	131.043	125.028	119.265	112.353	115.626	122.856
	38.0975	36.0922	35.4677	35.0324	35.3527	34.8964	34.1093	34.1551	35.0961	34.8286	34.1759	34.0837	33.5841	34.464	33.7389	33.4205	33.2996	32.4961	30.922	31.3539	35.4523	32.2208	32.6502	31.7972	160.955	139.742	117.962	99.781	86.7982	89.7024	102.197	110.127	109.049	106.508	104.564	102.269	99.6403	101.521	103.932	97.6079	96.2152	104.254	94.5815	95.3059	101.467	94.003	87.0963	96.6592	97.3707
	35.3913	33.6111	33.3289	33.0216	33.5711	32.4969	32.2032	32.065	32.5181	32.0882	31.8089	31.8547	31.5484	31.7139	31.4408	31.179	30.442	29.581	28.0643	28.9347	32.8873	29.9913	30.5674	29.3474	108.163	100.013	86.4403	74.9557	75.181	86.2445	85.3609	82.0828	80.2715	83.9762	85.3001	82.0586	82.4653	84.0146	80.2353	83.4424	76.9473	78.8278	74.2703	78.6421	78.6463	78.7146	77.8264	76.1065	74.7801
	33.0163	31.5001	31.1065	30.9222	30.8419	30.5063	30.6828	30.4752	30.4479	31.01	30.5987	29.9496	29.6784	29.7524	30.11	29.611	29.1674	28.1162	26.8544	27.279	31.3813	28.7917	28.757	27.6145	80.8954	142.488	113.796	93.0281	88.4559	96.7734	105.887	102.857	97.5565	96.1095	97.0638	91.7055	92.5085	91.4591	86.5518	82.4963	80.875	76.9747	73.8201	73.5018	73.8106	73.6272	75.3064	74.8413	75.6479
	35.5117	33.2493	32.5858	32.1118	32.5002	31.8181	31.325	31.2934	31.262	31.3752	31.1845	30.3564	30.0834	30.7175	30.1568	30.0693	29.8416	28.676	27.976	28.8421	32.0852	29.4858	29.5972	28.6475	61.4951	112.389	128.527	123.402	120.169	116.62	115.372	114.194	112.165	113.569	112.109	109.381	104.95	101.817	97.8207	95.2877	94.3572	92.1602	90.6287	89.1155	87.0223	86.093	84.4982	83.2444	81.0204
	58.5573	57.1668	57.4422	56.8666	56.5462	55.969	56.0651	55.3461	56.2977	55.4292	55.5018	55.8246	55.4067	55.9687	54.8023	55.4921	54.6656	53.8373	52.3854	52.2837	56.1687	53.6707	53.9277	53.0933	127.855	118.467	107.068	109.49	109.913	110.535	110.23	110.857	109.898	110.596	111.707	109.5	106.581	102.951	104.725	103.025	102.947	101.12	102.023	100.307	103.243	100.235	99.2313	100.186	99.0654
	39.8512	38.0464	37.9344	37.0149	37.8596	36.8851	36.7696	36.5787	36.9869	37.1994	36.6907	36.653	36.3733	36.5755	36.3528	35.9187	36.1187	34.351	32.904	33.5295	37.5735	34.8673	34.7942	34.444	114.525	104.154	89.8608	79.8389	83.0285	88.2532	88.4598	88.9958	89.3853	88.2365	88.3892	85.9591	89.4171	84.4097	82.3189	84.2275	83.3268	84.8481	77.8383	80.0599	81.4603	79.6187	80.2519	80.127	81.7122
	51.745	47.4316	48.4022	49.0022	48.7374	48.7807	50.1838	49.6883	49.0031	48.3636	48.5605	48.7965	47.686	47.3708	48.004	47.6385	47.3329	48.3921	47.921	48.5143	48.7996	48.5853	47.8015	47.9282	108.733	110.325	110.304	109.577	106.864	109.44	108.266	108.707	108.243	106.553	107.128	108.566	106.665	107.251	107.668	108.313	109.715	107.31	105.565	106.398	103.669	103.524	104.017	100.352	98.287
	59.6516	53.7505	54.2565	54.7107	55.1534	54.5765	55.7252	54.9945	54.5917	54.2453	53.8418	53.8596	52.8083	52.3361	53.0329	52.851	53.3534	53.5632	53.5838	53.8376	54.0406	54.0413	54.0267	53.8798	63.2587	64.142	64.4214	64.7144	65.0962	66.6722	68.4264	70.8145	71.3407	72.0888	73.1781	74.7684	74.9727	75.6191	74.6807	73.7226	74.2183	73.6457	73.8736	74.708	74.3965	74.298	75.2792	73.9804	73.0896
	24.019	21.4534	21.762	22.2606	21.6797	21.6792	23.2116	21.9521	22.0714	20.8418	20.7141	21.5484	20.7128	20.0259	20.2628	20.3964	20.3317	21.1325	21.4848	21.2383	21.8905	21.6231	20.9746	20.7941	45.3735	50.4311	61.6052	70.7224	70.9031	71.6928	70.6083	68.2839	66.3748	64.8471	63.7264	62.5357	60.159	58.9685	55.4036	53.3761	52.5673	50.8271	49.693	49.5979	47.8638	46.5456	46.8035	46.9743	45.6519
	41.073	42.4426	43.1149	43.9532	43.3475	43.2546	44.5721	43.5774	43.0894	42.5052	41.6795	42.6353	41.9925	41.2251	42.3331	41.4165	41.9548	42.5136	41.6749	42.6064	43.5842	43.5707	43.0938	42.9649	62.0432	98.1095	111.389	114.754	115.663	112.913	113.611	113.452	107.526	106.278	103.947	104.543	99.7376	97.71	93.6836	89.8835	89.4271	87.104	85.0535	82.9878	80.8669	79.9627	78.3875	76.3028	75.2487
	7.72324	3.965	2.73897	2.62107	1.58992	1.99234	2.9047	2.80752	2.60371	2.94616	2.1699	1.41732	1.54452	2.17029	2.87993	2.54367	4.23094	3.73073	3.69364	4.19962	4.08234	4.26725	4.5088	4.51584	110.42	101.422	93.929	87.38	83.7852	80.7234	76.8408	74.9905	72.0462	71.5144	68.4784	64.4152	63.4842	60.2327	58.4157	55.4438	54.192	52.3683	49.9573	47.6232	47.3182	46.5388	45.9854	43.24	41.8229
	31.4014	27.1824	26.1785	25.0286	23.7846	24.0742	25.2269	24.7509	24.2654	24.6015	24.6208	24.2127	23.8448	25.2926	25.4149	24.8782	26.3786	26.1345	26.9121	27.3512	27.2786	26.8381	27.2969	27.5343	94.402	87.4431	81.6264	74.7051	69.0705	68.1939	71.9953	77.0552	74.831	73.5118	71.6254	70.2568	71.5771	71.4245	73.1658	69.473	69.0609	69.9616	68.2467	67.7317	67.3953	67.346	68.7769	63.9117	65.761
	16.5778	12.3833	11.7522	10.4588	10.1793	10.0456	11.1534	10.8781	10.9001	10.8119	10.6913	11.3436	10.8233	11.177	10.8691	11.0214	11.8036	12.3618	12.6527	13.3939	12.2403	11.8801	12.8238	12.5834	69.3494	61.2964	60.1044	61.8281	61.3135	55.8127	53.7797	53.1243	51.5444	50.5383	49.6611	46.8445	45.512	43.2161	42.9754	41.8491	40.3393	40.614	39.8424	39.3168	38.7852	38.9521	40.0987	36.7741	36.4773
	29.7859	25.6582	24.2442	24.4087	23.4933	23.2994	24.2064	23.6643	23.0409	23.7018	23.8943	23.2899	22.6675	23.2838	22.9009	22.89	23.7678	24.0501	24.9011	24.9081	25.0821	25.0499	25.5777	25.6174	60.0196	52.5509	50.3063	53.3145	62.1641	57.1615	53.9669	52.5935	54.1873	55.7661	58.4769	58.2119	55.3091	52.7313	52.9892	52.5172	52.1464	52.5667	52.7288	52.4098	51.8345	51.7707	54.6626	52.2626	53.3109
	47.4605	43.7825	41.6968	40.7566	39.3791	39.2	40.9698	39.2764	39.7527	38.4058	38.2629	39.1405	37.9451	38.4429	38.159	38.5369	38.9268	38.275	39.7717	38.783	39.9409	39.3452	38.928	39.3958	272.261	246.522	220.05	203.315	192.863	182.667	175.067	169.809	163.197	160.926	154.288	147.48	142.607	137.194	135.443	131.731	125.397	124.571	116.082	113.405	109.585	107.744	104.13	101.21	95.6294
	62.3543	58.1354	55.9124	55.2132	53.5733	53.6244	54.6097	53.923	53.463	52.7385	52.7647	52.393	51.1179	52.259	51.0515	50.9879	51.8395	50.9979	51.305	51.7809	52.0848	52.4844	52.3985	53.3023	316.126	248.479	204.235	175.99	160.306	155.258	150.874	154.407	152.418	153.193	150.059	146.315	146.692	141.816	144.14	143.008	136.959	134.272	129.705	124.051	120.233	121.115	120.178	116.938	113.741
	55.6473	50.8303	49.4562	48.923	47.2013	47.7015	48.6102	47.1286	47.5442	47.9559	46.6079	46.877	46.2893	46.6288	46.4924	46.1276	48.3765	47.9029	48.2174	48.3623	49.2618	49.1829	48.8507	48.6444	66.9483	64.7041	64.2942	64.5253	66.7387	69.1762	70.6694	70.6505	70.5986	73.4637	73.4437	72.5015	74.6658	74.7664	77.0216	77.8017	78.487	79.1287	80.3152	79.1311	79.4656	80.8042	82.1949	81.1007	80.9486
	29.6465	25.2757	23.1013	22.9944	20.9503	21.2448	22.9797	21.4461	20.3899	20.3733	19.1412	18.6847	17.7459	19.2801	18.3349	18.1134	18.7242	19.1081	18.9889	20.0045	20.3695	21.2967	21.0184	21.955	506.928	362.947	268.284	210.085	183.018	171.361	171.342	182.49	187.06	193.755	190.798	180.714	181.233	165.845	163.296	154.285	145.511	138.665	127.688	123.229	119.311	114.629	113.203	110.69	107.65
	7.97952	3.3559	1.96652	1.37559	-0.517259	-1.23067	0.145178	-0.957734	-0.869397	-1.43294	-1.9928	-2.17484	-3.19339	-2.25945	-2.77163	-2.87696	-1.54438	-2.05555	-0.68426	-1.17608	-1.33253	-0.907971	-0.0561848	-0.373378	355.946	264.253	204.062	162.087	135.201	115.11	99.0163	88.7312	79.2092	73.24	67.7138	62.2931	58.5723	54.9366	54.6017	53.4744	52.3037	50.6703	49.9189	48.6174	48.73	48.2166	49.5269	47.4305	46.7876
	28.2876	22.6969	21.1413	20.1714	18.9166	18.4876	20.3004	18.6203	17.4975	17.7779	17.6156	17.01	16.1346	17.0003	16.1026	16.2962	18.3125	17.3005	17.8908	18.3658	19.1964	19.39	19.655	19.5319	331.017	261.156	213.032	177.81	158.505	143.504	130.458	119.737	114.101	108.084	103.563	97.1817	94.271	90.2245	90.4062	89.3946	88.3713	86.8598	85.3786	83.7087	84.0966	82.9187	84.7195	81.7811	80.9471
	35.7225	30.3198	28.9356	28.6447	27.9728	27.5176	29.3771	28.6662	28.0838	28.5217	28.5101	28.4391	27.8738	28.9996	28.8286	28.2034	29.7536	29.3058	29.2462	29.6651	29.6474	28.9235	29.4905	29.6422	68.2807	63.7979	61.8623	59.7915	59.6847	59.824	60.6759	62.8359	62.9503	64.5277	65.1607	64.4996	63.9787	63.6319	65.4363	65.4443	64.4663	64.5691	66.2129	65.847	66.2196	65.8357	67.6627	65.7672	66.1272
	27.3234	23.2554	21.0389	20.519	18.583	18.5646	21.0618	19.4303	18.3548	18.3344	18.3678	18.6305	17.0341	18.5968	18.4203	17.2259	19.4726	18.324	19.297	19.0178	19.5597	18.998	20.0325	20.1248	37.4144	39.0328	40.5055	42.6903	46.7389	49.631	51.3363	53.0385	52.0203	55.2653	55.4108	55.256	56.3975	55.2485	58.1241	58.019	58.3032	59.5999	59.2763	59.2924	59.447	59.4943	63.4139	62.3684	61.8354
	23.0866	18.3113	16.2229	15.4869	14.4571	12.6	14.4126	13.2991	13.5242	13.3052	12.8578	12.7822	12.4019	12.8437	11.452	12.3137	13.8202	13.4604	14.5237	14.7799	15.1363	15.0638	15.5779	15.5313	39.3782	41.8868	48.5952	57.2373	65.0228	67.6252	71.2816	73.3934	69.7065	72.3424	68.8707	66.0726	65.3393	63.8437	64.5383	61.2115	62.227	61.6865	60.7956	57.4619	57.6143	57.5739	60.0942	58.1444	59.1414
	29.2841	24.4763	22.2372	21.5994	19.9136	19.0429	18.77	18.6248	17.6006	17.8705	17.1951	15.9758	15.982	16.6194	15.4976	15.7155	17.7592	17.3606	17.3	17.776	17.8838	17.4659	18.3947	17.6337	78.1965	79.5512	87.2139	88.237	88.9588	94.2439	99.2569	107.131	105.094	105.854	100.67	93.3463	88.2045	84.9531	84.8224	84.0233	82.7593	81.9967	79.3154	76.0035	74.3372	73.8946	75.7529	74.6475	72.8929
	43.0234	38.9999	37.3361	37.0898	35.8559	35.5812	37.1179	36.1737	35.2867	35.7409	35.4808	35.4073	34.9549	35.259	35.5496	35.277	36.1947	35.7686	37.2168	37.0372	37.3072	37.4473	37.8901	37.2879	73.5218	71.6335	71.8243	68.6092	68.5024	68.2583	70.6454	74.2795	72.6687	73.7045	71.5798	69.856	69.1348	69.0698	72.1388	74.2327	76.0085	74.6574	73.8861	72.1005	71.5198	72.0696	73.6037	73.0745	72.4095
	57.8657	52.981	51.2258	49.7404	49.1275	48.4483	50.4285	49.162	49.0638	48.7928	48.5601	47.9895	47.3313	49.3131	47.6905	47.735	48.5948	48.3861	48.4337	48.4627	48.5788	48.9275	49.366	48.2285	65.1815	63.0886	64.8882	64.4713	66.9777	69.0909	69.9429	69.9517	69.4199	72.0062	72.4375	72.0679	73.8168	73.8396	75.7331	77.4436	78.3506	78.5566	79.5057	79.0597	80.0257	80.6741	83.392	82.4778	82.9171
	36.3895	30.581	28.9541	29.3174	27.4488	26.9202	29.8783	27.0133	27.6821	26.6797	27.0375	27.4957	26.7923	27.5835	26.5291	26.3409	28.7292	28.129	29.3745	28.257	30.3446	30.1243	30.3743	29.7425	57.0164	56.3776	58.7809	61.0828	62.6143	63.3229	63.7249	64.7161	64.7108	65.308	66.13	66.148	67.619	66.4662	70.3528	73.3565	72.3622	74.834	73.6911	73.8357	73.8194	75.228	78.2406	76.2279	77.9457
	56.6822	51.6924	50.03	49.1703	46.6611	46.9307	48.157	46.6942	46.373	47.0847	45.4796	44.8629	44.3038	44.6444	44.4402	43.6076	45.8614	45.0673	46.6495	47.0909	47.4605	47.8404	47.6209	46.9609	381.466	291.027	232.036	194.565	175.584	164.153	156.208	144.928	140.755	138.643	136.113	130.687	129.906	132.103	130.593	129.488	129.091	124.284	123.188	120.347	119.385	119.062	119.812	117.022	118.219
	78.7292	73.9343	71.0192	69.7975	67.6305	67.5704	69.082	68.0213	67.6133	67.5378	67.1717	64.6055	65.5785	65.2475	65.9254	65.4495	67.3973	65.5392	67.0405	67.7176	66.4679	67.0476	68.6648	68.1805	480.354	349.914	278.98	255.43	264.097	278.156	288.82	279.723	265.524	249.966	241.21	229.498	233.046	231.476	229.469	222.581	218.442	218.535	212.062	200.553	200.349	194.556	196.551	193.199	188.354
	63.8277	59.9871	58.1976	57.5968	56.0382	55.3064	56.7387	55.7543	55.2266	55.174	55.7982	55.3279	55.2063	56.284	55.9776	56.0984	57.4432	57.2414	57.7244	57.2207	56.9603	57.381	57.6932	56.7774	260.515	216.503	189.852	175.897	187.896	196.961	195.777	193.41	189.319	183.156	181.291	177.404	173.644	170.924	174.889	169.777	174.112	171.528	173.208	166.815	167.799	166.62	163.318	158.211	158.284
	72.3165	66.8083	65.2024	64.8013	63.912	63.1163	64.9305	64.1825	63.5012	62.855	62.7977	63.1621	62.4302	63.2881	62.4305	62.3676	64.0648	62.632	62.9795	63.6995	63.3173	63.2753	63.5962	63.3493	104.572	95.5081	92.1193	91.0717	95.4447	101.213	100.527	99.1866	96.9492	98.0156	100.338	99.6195	100.172	99.4337	103.767	103.612	104.28	104.752	104.226	103.569	103.37	103.173	105.193	103.397	104.24
	34.3204	30.537	29.3107	28.3825	27.0586	27.5861	27.8125	26.9143	26.7987	27.4623	27.4595	27.3705	26.5927	27.6565	27.421	28.3093	28.3572	28.7926	28.4292	29.1043	29.7288	29.0697	29.344	28.5578	126.885	102.283	96.8574	91.8725	104.526	109.387	90.1004	83.7037	82.1148	85.1959	84.7724	79.0259	78.4055	73.6668	70.9886	70.2155	69.0956	68.5909	66.5594	63.3033	62.8976	63.1184	62.7088	61.7329	59.8867
Time (s)	0	2	4	6	8	10	12	14	16	18	20	22	24	26	28	30	32	34	36	38	40	42	44	46	48	50	52	54	56	58	60	62	64	66	68	70	72	74	76	78	80	82	84	86	88	90	92	94	96
[truncated: 102 more columns]

## Sheet: Panel B
IP3R1 shRNA cells	22.1726	21.4205	21.4059	22.1257	22.3148	22.5469	23.7587	24.5154	24.9663	25.1232	25.5637	26.0154	26.1825	26.9489	27.8038	26.9659	26.3648	27.1154	26.5847	26.9485	26.4984	28.1905	28.8593	28.9557	26.1176	25.8376	27.5759	26.7495	27.9124	28.5117	29.3407	30.0362	30.1729	30.0667	30.3721	29.0124	28.7793	29.3925	30.2041	30.2027	30.8134	30.6326	29.8317	29.1329	29.7331	28.907	29.2253	31.1551	30.1031
	10.2626	10.1472	10.0067	10.4472	10.8121	11.3949	12.0356	13.5868	14.3815	14.9735	15.5425	15.9239	16.7697	17.3401	17.4841	16.9494	16.9411	17.2265	16.6057	17.5868	17.1438	18.2897	18.4872	19.1824	16.5812	16.904	18.1585	16.9296	18.4628	18.5225	19.5122	20.9116	20.5048	20.1598	20.2859	19.506	19.1623	19.9877	20.7931	20.3963	21.0443	21.2643	20.7759	19.9493	20.3743	19.5303	20.1952	21.4714	21.1695
	25.922	25.6601	25.2642	26.146	26.0403	27.0877	28.1723	28.7588	28.9848	28.8754	29.7388	30.5336	30.2378	32.1225	32.2362	32.0224	31.5892	32.0867	31.4561	31.7518	31.5518	32.7351	33.668	34.4176	31.7142	31.7816	33.5268	32.7946	34.2213	34.971	35.2921	36.35	36.4288	36.3345	36.6144	35.2464	34.4128	35.2568	37.0862	37.0299	37.3386	37.4272	36.5082	36.0396	36.2212	36.2186	35.9665	37.9268	36.4766
	27.4419	26.5197	27.137	27.6144	27.5885	28.3877	29.2853	30.0122	30.73	30.525	30.388	30.9273	31.2424	31.8337	32.6353	32.4469	32.1871	33.0962	32.3104	33.9525	33.5951	35.0299	35.7386	34.8342	32.0909	32.5483	34.489	33.252	34.2513	35.0207	35.6751	37.5149	36.8572	37.5024	37.8476	36.488	36.3583	37.2116	38.3041	38.2838	39.2669	39.1932	38.3928	38.1445	38.7556	38.765	39.0829	40.5179	38.8548
	16.114	15.8209	15.9921	16.4721	16.711	16.7468	18.4451	19.2829	19.5268	20.2805	20.5835	20.6201	21.4228	21.9987	22.8779	22.33	21.9779	22.7581	21.7164	21.6935	21.5287	23.5074	23.9555	24.0769	22.2029	22.0401	24.9332	23.3629	24.6565	24.8322	25.2994	26.8788	27.2232	26.0157	26.6975	25.2997	24.8093	25.8349	27.0519	27.3937	27.9967	27.9539	26.718	26.1141	28.1162	26.9888	26.827	28.9241	27.9378
	24.3088	23.5211	23.1847	23.9715	24.4982	25.1485	26.0742	27.3519	28.0872	28.0888	28.593	28.8029	28.8171	29.946	30.4761	29.9837	29.6355	30.647	29.347	30.0202	29.4519	31.4158	31.7038	31.7599	29.3877	29.4341	32.069	30.9456	31.7902	32.8167	33.4857	34.5217	34.589	34.4515	33.4802	33.278	32.7509	33.7412	34.9619	34.5014	35.1847	35.0756	33.8159	33.8233	34.9506	33.8908	33.8045	36.1033	35.4586
	31.5766	30.8491	29.756	31.4604	31.7354	32.0509	33.1188	33.6228	34.6247	34.459	35.4937	35.3884	36.2149	36.5432	37.3176	36.4173	36.6	37.6692	36.9629	37.051	36.6432	38.1154	38.4725	39.0908	36.066	36.3042	38.3135	37.4107	38.3241	39.0993	39.7027	41.0996	40.691	40.5661	40.6661	39.6775	39.4569	40.4686	41.8376	41.314	41.8618	42.3829	41.563	41.2729	42.4885	40.842	40.9642	42.894	41.3886
	40.1454	40.3844	39.9085	40.2469	41.2315	40.5183	41.6688	43.0455	43.5232	42.9278	44.4381	44.4715	43.9244	45.9048	45.4107	45.3296	44.7517	44.8687	44.3401	44.2614	44.14	46.6055	46.3316	46.6123	43.8644	43.6168	46.4081	45.0674	45.8013	47.2848	46.9016	49.1389	49.2845	48.6144	48.4878	47.4172	46.896	47.8706	48.8966	48.1673	49.4478	50.0106	48.7583	48.3459	48.8796	48.0279	47.1006	49.5665	48.3715
	14.3945	14.0576	13.6054	14.2267	14.8364	15.4602	16.0057	17.1994	17.7625	17.074	17.5306	18.2252	18.1328	18.9316	18.536	18.5805	18.1273	18.5779	18.4158	19.0128	18.806	19.882	20.6208	22.1745	18.9203	19.2276	21.2837	19.9784	20.8691	21.3882	21.3812	22.403	22.1512	22.4731	22.7003	21.6927	20.8268	22.0101	23.2432	22.9819	23.0323	23.0828	22.8712	22.5608	23.8129	22.7596	22.3812	24.467	22.6479
	24.7549	23.5843	23.5773	23.8181	24.0198	24.7048	25.4764	26.2007	27.2736	26.9852	27.5185	27.6484	27.8446	28.6455	28.7842	29.2765	27.9806	28.6701	27.8823	28.6743	27.9601	29.6092	29.9668	30.8092	28.4134	28.8698	30.0446	29.6621	30.9272	30.931	31.4434	32.6875	32.588	31.9718	32.1867	30.9583	31.3029	32.4351	33.0718	32.346	33.9195	33.5711	32.8441	32.192	33.0113	31.9244	32.0095	34.0755	32.9601
	22.2725	21.6259	20.5731	21.9251	22.1078	22.366	23.2514	24.2883	24.2386	24.6979	25.3106	25.7302	25.4586	26.1919	26.8181	26.4197	26.0024	26.5782	26.0708	25.8861	26.1584	27.2462	28.0176	28.7757	26.1671	26.2635	28.1697	27.7732	28.2033	29.0881	29.3256	30.41	30.4201	29.9794	29.938	29.2007	28.519	28.6153	30.3625	30.4816	31.1191	31.5896	31.0594	29.588	30.9211	29.5576	30.1446	31.5582	30.9633
	40.374	39.9362	38.5009	39.888	40.2652	40.7646	43.0164	43.3454	44.5302	44.286	44.3519	44.5707	44.9428	45.6141	46.5482	45.8379	45.6129	47.0602	46.4214	47.4384	46.4779	47.8366	48.4677	47.58	43.9326	44.1035	45.0702	43.314	45.7597	46.4037	45.7993	47.1041	46.9042	48.1116	47.294	46.4701	46.1856	46.9623	49.0525	48.29	48.36	48.7161	48.4401	47.1968	48.5916	48.2876	48.0783	49.7015	48.6797
	25.0539	24.073	24.1496	24.7493	25.588	25.3284	27.0827	27.4923	28.3014	28.4	29.2443	29.505	29.4101	30.7638	30.7303	30.3076	29.4184	30.1974	29.3652	29.9007	28.9979	31.1544	30.8914	31.6686	28.0021	28.5538	30.2868	29.4406	30.7368	31.0055	31.3459	32.6086	32.2104	32.4986	32.7983	32.0319	32.1765	32.5083	32.8043	33.435	33.9857	33.3193	32.6198	32.0556	32.8947	32.7127	32.4198	34.4123	32.8522
	27.9051	27.2646	27.4601	27.6402	28.1759	28.9273	30.6788	31.0704	31.2341	31.4635	32.9482	32.6761	32.8167	34.3586	35.0063	34.5223	34.2235	35.1639	34.7455	34.9241	34.9485	37.0932	37.5602	37.7539	35.7026	35.4305	37.842	37.0711	37.8145	38.5775	38.8157	39.8807	40.2155	39.7747	39.726	38.1167	37.8222	38.9388	40.2509	40.6359	40.608	41.6168	40.2369	40.7617	40.3891	40.5319	40.5307	42.8412	41.1547
	40.5877	40.3536	39.0353	40.6378	40.2362	41.731	42.7661	43.3982	44.4429	43.9884	44.0876	44.0433	44.2558	45.1136	45.5639	45.3359	45.6161	45.6252	45.0134	45.5023	45.366	46.3399	47.4442	46.9775	44.2168	44.2384	46.5786	45.5897	47.0047	47.7292	47.8419	49.0374	50.3234	49.8579	49.7956	48.8719	48.0003	49.2819	50.1864	50.9427	50.2854	50.8115	49.5613	49.3728	49.9527	49.5686	48.1514	51.356	48.2989
	50.5199	50.1672	49.9746	50.6742	51.7386	51.5724	52.8816	54.2345	54.5332	55.3677	55.594	55.9714	56.2689	57.3308	58.5287	57.7505	57.8135	58.7358	57.9291	58.0473	58.0382	59.3962	59.7531	60.3053	58.0108	58.1661	59.999	58.4598	60.0083	61.2268	61.8051	63.8036	62.6107	63.2688	63.5276	62.2992	62.0232	62.6086	64.023	63.9059	63.9851	64.189	63.4128	63.9323	64.4477	63.3541	63.4074	65.8237	64.9175
	28.5877	28.1966	27.6605	29.2236	29.0614	30.0496	31.2312	32.0765	32.4635	32.8657	32.7401	34.1227	34.147	35.4174	36.0213	35.4677	35.9144	36.6872	36.2521	36.0255	35.6625	36.9354	37.2198	38.2515	35.4897	35.5141	36.5937	36.3989	37.589	39.5682	39.6272	40.2443	40.4927	40.0265	40.5	39.9314	40.0176	40.609	41.5499	40.9136	41.9422	41.4815	40.8133	41.1398	42.3783	40.6688	40.3849	42.7336	42.5673
	58.1777	57.2082	57.2273	58.284	58.0813	59.0798	59.7412	61.28	61.7308	61.3371	61.8124	62.6244	63.4416	63.8542	64.4227	64.1374	63.6663	64.7572	63.6409	63.9454	64.3084	65.1038	65.9909	65.3329	62.4746	62.1894	64.3965	63.6061	64.548	65.3513	66.0185	67.3044	67.0798	66.9436	66.8036	65.5866	65.4451	66.5312	68.1974	66.8476	68.5386	68.4038	67.3321	66.9106	68.0266	67.7042	67.306	69.8857	68.4964
	54.9399	54.7998	54.317	55.4682	55.7083	56.5235	57.0995	59.624	58.9288	58.9994	59.8548	60.4629	60.4211	62.24	61.8172	61.4465	61.5848	61.6678	60.3545	62.1145	60.697	63.4081	62.9126	63.9356	60.3676	60.43	62.1862	61.5251	62.6073	63.5049	64.2439	65.4476	66.1482	66.1082	65.6311	64.9546	64.3485	65.6631	66.1455	66.0238	67.1877	66.1507	66.2628	65.7561	66.5464	65.1702	65.8784	67.482	66.6364
	27.8708	26.8505	26.7444	27.1992	27.6419	27.3558	29.4412	30.4712	31.3516	30.9281	31.7919	31.9963	32.4442	32.9997	33.8103	33.1442	32.4464	32.4866	32.8115	32.9048	32.7535	34.8632	34.5035	36.4484	33.5971	34.2105	34.7756	35.2081	35.6089	36.1097	36.6475	38.4513	37.9093	37.8335	37.8287	37.3858	37.7439	37.5992	39.7427	39.2056	39.7848	40.1387	39.1743	38.7028	40.4075	40.6287	41.471	44.0891	42.2475
	16.2398	15.4379	15.2308	16.202	16.6779	16.701	17.508	18.3736	18.3507	18.221	19.2633	19.7375	19.9614	20.4046	20.6508	20.9003	20.1687	20.8949	20.117	20.2904	20.1784	21.7953	22.2514	23.919	20.7443	20.6255	22.3052	21.3179	22.5254	23.3983	23.6231	24.6912	24.0919	23.8564	23.9309	22.5288	22.757	23.1546	24.7077	24.3453	24.578	24.9628	23.8763	23.1375	24.286	23.1494	23.1227	25.0744	24.2882
	35.9221	35.3315	35.0439	36.5065	36.7507	37.3717	37.9556	39.0683	39.934	39.6251	40.0374	41.5757	41.0825	41.8219	43.0035	42.2309	41.9771	42.6096	41.6149	42.4876	42.4369	44.1295	43.7807	44.4732	41.1665	40.9682	42.7372	41.7756	43.4086	43.2999	44.9605	45.6716	45.826	45.8862	45.4486	44.4739	44.3908	45.2688	46.5449	45.8991	46.2074	47.3409	46.0945	45.0587	46.178	45.5801	45.813	47.2136	46.588
	36.8284	35.7713	35.8497	37.0671	37.2553	38.0477	38.8158	40.035	41.0806	40.7706	40.7772	42.0195	41.5653	42.9608	43.3434	43.2998	43.5441	43.7854	42.7251	44.1344	44.0365	45.3205	46.1569	46.5621	43.877	43.8479	45.4179	45.0664	45.8051	46.5352	47.1718	48.1147	48.1287	48.5833	48.8809	46.8329	46.6226	48.1451	49.5701	49.107	49.8158	50.3078	48.9838	48.7464	49.0504	48.8719	48.6673	51.212	50.6472
	24.9261	26.3273	26.9007	26.237	26.0434	26.1238	30.5639	32.6179	32.6214	31.6509	32.8029	32.8685	33.7454	33.8104	34.0643	33.8873	34.2621	34.348	34.5445	35.4014	34.5792	33.6864	34.7707	35.9146	35.6514	35.2942	34.8133	35.3856	34.9886	34.7326	34.9375	35.5622	35.5393	35.4838	35.3018	36.2672	37.216	40.0568	40.002	40.287	41.4741	41.9098	43.3561	43.4297	43.7031	42.6119	43.2356	43.9409	43.4354
	20.042	21.3906	21.0888	21.9687	20.5821	21.2656	24.381	26.6082	26.6561	25.0179	26.231	26.5552	27.1285	26.6107	27.7105	27.0945	26.3413	27.9969	27.2198	27.5523	28.4774	27.2253	27.1773	27.7655	27.4383	26.9622	26.6245	26.6379	26.6893	27.4546	27.8641	28.0514	27.3586	28.052	27.6645	28.5448	31.5499	37.4216	37.1978	37.0385	36.953	36.9138	37.7084	37.4406	37.8249	36.5672	36.3381	37.0031	35.9691
	39.0778	39.8216	40.6089	41.216	39.5506	40.3294	44.4104	47.4061	46.9026	45.81	45.6092	46.5769	47.4425	47.285	46.4363	47.7857	46.771	47.2901	47.1279	48.2247	48.2896	47.579	47.3938	48.3256	46.8796	45.9362	46.1983	46.0911	47.8549	46.8575	47.8676	47.7591	46.7306	46.7458	46.8197	47.9872	47.3996	49.459	48.362	49.539	49.5473	49.6898	49.3797	49.1944	51.0287	49.8456	48.9245	50.1399	49.1611
	19.485	18.1165	17.1197	16.4193	19.8078	20.0413	20.3979	21.3988	20.8444	20.6255	21.613	21.2416	22.7614	23.0341	23.7269	23.3256	23.843	24.8447	25.0406	24.4343	24.4328	25.4504	26.7813	25.7459	26.3846	25.678	25.6559	25.2316	27.5749	29.8401	32.7057	33.9837	32.8751	35.9842	36.0151	38.033	37.158	37.2199	37.4658	37.0381	37.3075	36.9024	35.2117	36.6609	36.4543	36.9825	36.9311	36.653	34.8347
	10.3247	9.50425	8.23611	7.29982	9.33438	10.4222	10.7104	11.5423	10.0579	10.6904	10.9211	11.5399	10.9345	13.015	13.5126	12.9385	13.9727	13.5566	13.8877	13.6964	13.0357	13.8375	15.0749	14.0305	14.5448	14.1822	14.0748	15.1739	32.5566	37.3998	44.25	72.2086	117.159	149.543	149.935	141.802	141.535	138.091	130.854	126.295	120.562	115.921	111.38	111.081	105.172	102.375	97.8209	91.7818	88.9295
	6.29975	4.29985	3.5556	2.83208	5.07821	5.42433	6.29982	5.33792	6.09449	6.11818	6.83654	6.67999	6.8136	8.26976	8.50872	8.1577	8.8505	8.87965	9.36466	9.01672	9.22564	9.15825	10.1617	9.30681	10.8801	10.3455	10.2109	10.528	14.4077	17.86	26.4547	33.914	41.9141	58.0676	71.543	86.9887	100.597	97.8376	92.0421	82.8829	78.691	76.5315	72.9512	73.382	70.409	67.7084	63.844	60.8348	57.4732
	16.4896	14.5745	13.7937	12.699	15.6721	16.5629	16.4302	16.8489	16.0042	16.4125	16.9026	17.0164	17.1022	18.9017	19.2555	18.682	19.5632	19.9481	20.1376	19.9554	20.0516	20.2506	21.2003	20.2008	21.6967	21.4189	21.1487	21.5854	25.2129	33.7056	41.6033	52.576	61.8586	74.8785	89.6343	105.168	118.719	121.36	122.606	119.393	107.857	102.909	98.4302	92.7164	87.0419	81.6559	76.0415	68.9528	63.6576
	20.6156	18.815	17.7045	16.9049	19.913	20.1908	20.7802	20.9699	20.6882	20.8887	21.5496	20.7706	21.7073	22.9974	23.3423	22.8695	23.6156	24.5549	24.15	24.0913	24.0167	24.3814	25.9813	24.3265	27.3363	26.9973	26.6411	30.0848	51.4746	142.335	211.067	214.085	204.896	196.036	195.923	188.628	181.2	180.904	177.812	163.779	161.456	153.811	148.306	140.782	132.151	124.41	122.187	111.906	107.006
	12.2906	10.0421	9.85592	9.02488	11.7113	11.9248	12.3468	13.2025	12.8039	12.5366	12.9972	12.8855	13.2416	14.5337	14.9487	14.4905	14.9103	15.7822	16.3949	14.9826	15.8668	16.2295	16.4717	15.9179	17.5176	17.0428	16.2371	16.2602	17.4147	17.9797	18.9805	19.4346	21.9621	20.6794	20.5252	21.0949	20.6858	20.6264	20.2439	19.8313	19.7044	20.6521	20.7651	21.9148	21.6754	20.8732	21.5991	21.8338	20.7486
	24.2763	22.0313	21.3769	19.8629	22.0812	23.0523	23.4808	24.5871	23.356	23.5165	24.0723	23.9519	24.35	25.1047	26.1332	25.3756	26.3429	27.1165	26.6362	26.1592	26.6806	26.7838	27.242	26.2914	26.9606	25.8935	25.4213	25.7178	27.5279	28.3095	33.6847	38.6937	42.131	40.0974	39.6177	41.4744	40.5444	42.1288	41.6961	41.1908	42.7773	43.8179	45.3362	48.617	48.7849	51.1581	52.0064	53.5889	52.0016
	15.416	13.9943	13.6393	11.6558	13.966	15.0218	14.5757	15.5517	15.6256	15.0994	15.8847	15.3713	15.8603	16.9175	17.6849	16.4308	17.467	18.0294	17.8519	17.6071	18.5022	18.5591	19.316	18.1132	19.955	18.857	18.5141	19.1658	21.7984	26.9023	58.0875	115.066	140.597	129.105	116.047	112.678	106.831	108.905	100.547	97.2998	100.47	93.3569	94.5746	94.6169	92.7644	92.9029	88.966	84.5082	76.0268
	13.8695	12.747	11.6679	10.3264	13.0307	13.2318	14.009	14.3649	13.3163	13.6898	14.4909	14.7219	14.5253	15.2531	16.9045	16.4381	16.7943	18.0369	16.7842	17.3604	17.4027	18.141	18.515	17.6869	19.4125	18.048	17.927	17.8605	19.8585	22.448	26.4365	31.7795	33.1081	36.5728	38.5003	39.7699	39.0849	38.8042	37.3548	36.3869	36.8712	36.6758	35.9458	37.0018	36.1333	36.1599	36.8076	34.1898	32.4181
	17.9746	16.7347	14.5254	14.6304	15.6308	16.9324	17.5372	17.309	17.8439	18.1329	17.8575	18.611	17.8318	19.8666	20.4691	20.1901	20.7893	20.8127	21.2083	20.9062	20.4859	20.897	21.7782	20.9231	22.4719	20.8913	21.2585	21.1808	22.6656	26.971	34.9624	45.8549	53.0539	64.167	67.2196	72.1892	76.6091	84.3668	84.235	86.3523	91.6853	95.042	97.5746	103.701	102.378	104.821	106.331	101.443	94.9749
	11.6324	10.9325	9.3038	8.62336	10.8004	11.2715	12.1618	12.0445	12.3239	12.3392	12.4051	12.8999	13.2147	14.1313	14.3456	14.576	14.1887	15.5687	14.9616	15.2901	14.4655	16.009	16.0072	14.6814	14.2529	14.7158	15.1989	20.5664	77.8081	175.489	198.306	198.198	191.454	186.393	176.606	166.589	157.16	146.622	139.817	132.169	123.75	119.115	111.242	105.444	100.547	95.978	89.3911	86.224	81.3149
	20.3559	18.6934	17.8802	16.9288	18.7692	20.0218	20.3645	20.8299	20.3493	20.6456	21.1765	20.7869	21.4379	22.602	23.3479	22.091	23.0511	23.6781	22.9165	23.2974	23.2158	23.3148	25.2081	23.9191	22.6187	23.7096	22.9934	23.9306	26.2611	27.8088	28.1494	30.0144	31.0574	31.3707	31.2183	33.4043	34.3112	34.2532	35.9018	35.6643	35.6118	36.5703	36.5299	35.9139	36.9887	37.3894	37.0348	37.9315	36.2209
	12.2465	11.2637	10.2703	9.42385	10.4043	11.9834	12.8207	12.4039	12.0164	11.8607	12.3256	13.7373	13.1615	15.3118	15.3477	14.8104	15.7036	15.8119	15.9369	16.4747	17.6367	16.3372	17.2928	16.0149	12.1114	16.0029	16.5385	16.8723	18.625	21.554	27.9619	37.0686	55.7286	57.592	78.0666	97.914	137.166	162.998	188.843	174.7	155.217	147.511	134.514	128.198	122.246	116.264	113.417	102.966	93.5024
	28.9923	28.5515	29.3985	29.8157	29.0663	29.9373	31.0008	32.697	33.5694	32.3983	32.6363	34.233	33.441	39.5962	38.3198	41.1394	45.8765	49.2542	50.9612	53.8991	53.5563	54.2773	52.975	52.7247	53.1958	52.2177	52.6362	51.824	50.1664	52.4644	51.7089	50.5694	48.8615	48.7618	46.7349	47.9962	46.9843	46.4029	46.2227	44.1101	44.5556	44.2852	43.9256	42.2165	40.0718	40.5513	38.8208	37.7083	37.3471
	35.4033	35.1663	35.6893	36.2073	36.6984	36.8596	37.7872	40.2029	41.0912	39.9633	40.041	41.9611	40.5217	40.4154	40.6148	47.1919	54.6431	58.0451	58.1674	59.9957	59.527	60.1415	58.0394	57.6391	58.4679	57.575	58.2554	57.3858	55.976	58.4532	57.8306	57.5869	55.9255	55.3002	52.4565	56.8097	59.8603	59.5047	60.3747	58.7458	57.5584	56.9758	55.9801	53.1381	50.2438	49.2204	46.7714	44.1529	43.7161
	28.957	28.9827	29.7158	28.8475	28.5464	29.4566	30.7512	32.2191	33.0061	32.3769	32.5038	34	34.23	58.5595	57.6898	51.5332	45.805	44.1704	53.5088	56.0103	53.0456	50.8963	52.4659	53.7109	54.1229	50.7183	53.3088	52.8944	51.2685	52.9379	52.1701	51.6189	49.3607	48.6664	48.2569	47.3867	45.2903	43.5195	42.2273	40.2085	40.2242	39.3563	38.2983	36.6568	34.8772	35.2431	33.8453	32.282	33.1621
	50.1508	50.4146	50.7107	51.1902	51.5212	52.3032	53.2088	55.5951	56.202	55.1281	55.2664	56.7531	60.431	79.647	76.4494	71.1117	67.5359	73.369	79.113	83.7558	88.0375	92.0205	104.644	107.212	112.298	113.828	125.924	124.803	122.738	123.831	122.806	122.565	113.948	109.981	96.4292	104.571	104.196	101.231	98.5855	96.1551	93.7107	90.1956	87.3501	81.6413	76.1768	74.4821	69.5673	65.6064	63.5726
	32.6828	33.0929	33.3281	32.9036	32.9276	33.1931	34.8162	35.8693	37.4727	36.158	36.0934	37.433	44.6204	97.7259	91.1026	77.2591	65.8693	68.4464	88.3279	88.7	79.3512	75.3769	82.8975	85.137	83.4685	77.2994	80.8223	81.5252	78.1564	78.7953	78.5377	75.4805	71.7007	71.0325	64.8097	62.6515	60.1473	57.2231	54.3637	51.1272	49.1811	48.3196	46.3839	43.3825	40.861	41.0482	38.5133	36.4491	37.296
	32.3597	31.9638	32.694	33.6032	33.5032	33.643	34.6656	36.3341	37.8249	35.4978	36.004	37.5548	35.7034	37.208	54.6599	53.3656	48.3468	46.3545	45.199	50.1082	53.9151	54.1243	52.6893	53.0579	59.6308	65.5007	67.7091	70.0352	78.7336	88.7675	91.57	93.0569	95.1898	101.271	122.296	132.751	132.59	129.343	126.841	120.949	116.085	112.598	106.472	99.3914	93.7418	90.3171	84.0465	79.4573	76.4084
	28.5554	28.9154	29.6901	30.1103	29.8097	30.7963	31.9309	33.7287	34.2956	33.7288	33.7189	34.5164	36.361	50.9399	47.412	44.1265	39.6552	38.4749	39.3244	46.7902	45.8029	45.3141	43.9927	44.1943	47.0706	45.9784	46.3351	45.208	44.0502	46.2531	44.9387	44.1494	43.9233	43.2865	44.276	58.2284	72.7564	76.6066	83.3061	83.1113	82.4712	81.2795	78.1949	74.0653	70.9751	70.0079	63.7254	61.1865	60.1915
	41.3602	40.7012	41.5678	40.4626	40.5828	41.3541	42.0296	44.0376	44.5514	42.8138	43.1252	45.2449	43.5868	44.4442	52.5868	49.8037	47.3534	47.0683	46.3674	49.3627	50.5029	50.4981	48.9518	48.31	50.377	49.6075	49.4297	48.8131	48.5714	50.4572	49.7324	48.4888	46.996	47.153	45.6978	45.7131	44.4632	44.0908	42.8749	42.7637	42.7249	42.587	42.2311	40.6315	39.8751	40.0593	38.5951	38.2047	38.4936
	19.0125	19.053	19.2632	18.9718	18.9994	19.5518	20.2739	22.232	22.6702	21.0074	20.8015	22.4033	21.228	19.8288	19.0752	19.2826	19.051	19.5064	19.2897	20.4597	20.4657	21.2593	20.488	20.9051	23.978	24.0503	25.235	24.9511	23.6071	25.7488	25.1069	25.1554	24.3118	25.7157	37.5326	42.5083	45.7543	47.3228	48.5323	47.9094	48.39	48.4967	46.5128	44.8657	42.4569	41.9264	40.3085	38.078	38.425
	28.1057	28.2795	28.9432	28.5685	28.1039	28.3279	30.108	32.2158	32.2972	31.1944	31.7117	33.447	32.6386	31.2257	30.9933	31.4493	30.6266	32.0058	32.538	34.0885	35.4657	37.4636	37.7892	37.7332	40.214	39.1435	40.321	40.035	38.2287	40.2831	39.7089	38.2103	36.5343	37.3955	38.6057	41.3859	42.4587	42.8912	45.6931	44.6509	45.3314	45.6019	45.0333	42.5168	41.2815	40.573	39.5516	37.9514	38.3325
	23.8331	23.7468	24.4717	23.8509	23.8113	24.519	24.6836	26.9485	27.2066	26.2658	26.1051	27.9015	26.6783	26.3252	26.2666	25.8774	25.7204	25.9084	26.1191	27.3322	27.4771	27.9007	27.9695	27.6697	29.8152	29.297	30.4989	30.1958	30.8969	33.5414	33.7017	33.1101	32.493	33.2854	36.4612	36.7563	36.3097	35.5353	36.2603	34.7442	35.4697	34.5746	35.0093	33.9213	32.6734	33.2964	31.4305	31.1106	31.5614
	25.9761	26.4088	26.9935	26.8334	26.8585	26.9223	28.0511	29.7781	30.8623	28.6271	28.6653	30.2016	28.9203	31.2968	32.4924	32.4318	31.0314	30.5856	30.7481	33.0754	32.9776	33.9831	32.9658	32.6462	35.0312	34.6584	35.6826	35.6114	34.8271	36.5818	38.4981	37.6087	37.4793	37.0754	69.6813	91.8453	95.1604	94.8956	91.6605	87.4555	83.8822	80.9923	78.1469	73.4104	69.0474	65.7286	62.4654	58.144	57.6455
	19.5028	19.4054	20.2478	19.823	20.0552	20.4297	20.9347	22.5023	23.4853	21.9666	22.0442	23.6007	22.4908	22.5422	21.6692	21.3668	21.9297	22.4287	23.0681	24.4673	24.3925	25.4326	24.3732	24.8694	25.9139	25.5982	26.6435	25.6108	24.8941	27.1987	26.7341	26.5515	24.6295	25.4438	31.2594	38.5626	52.2726	65.144	83.3771	87.7274	91.1226	95.8834	91.8425	87.5969	81.2042	77.3386	74.4148	70.439	69.1392
	25.683	25.9925	26.7121	25.983	26.5322	27.0463	28.1622	30.3885	31.0397	31.0171	30.4146	31.4366	54.9715	79.1241	70.6708	57.5859	48.4261	47.6361	56.6822	67.0901	63.6818	59.6558	58.3419	60.005	62.4495	60.0521	60.3196	57.2104	54.7912	56.9427	56.1369	54.5367	51.1233	50.5387	45.3953	47.5391	49.9891	50.6417	57.1788	59.0962	59.3395	59.9083	59.5235	55.0634	54.8268	52.5915	51.1346	46.7479	45.9998
	22.4058	22.0808	22.3665	22.731	22.6331	22.6994	24.1765	26.2968	26.4983	25.7083	25.1841	27.0288	25.8966	23.8834	23.4275	23.7335	23.0548	23.0984	23.1938	23.9107	24.364	24.6726	24.0284	23.8808	25.4322	25.1733	25.9183	25.8261	24.7708	26.627	27.1297	26.4583	25.4219	26.1321	35.2549	38.4929	46.8433	51.2956	60.3628	60.4869	60.9094	61.7199	67.1762	64.5508	59.9429	60.2402	55.5071	52.2813	49.9384
	40.3056	40.8471	40.8755	40.4287	40.1026	40.7881	41.3254	44.0349	44.545	43.3241	42.5881	44.605	43.9935	41.9535	42.3025	41.9855	41.0689	41.9005	41.656	43.0813	42.4809	43.8661	42.6164	41.9953	44.0688	43.1299	44.7905	43.6456	43.6104	45.3297	44.9878	44.6289	43.6458	43.4486	45.7186	46.0409	45.0256	44.4621	45.3836	44.9665	45.6914	46.4067	46.9335	45.4845	44.7111	45.8377	44.3562	43.0891	44.2182
	23.9075	24.1867	24.4307	23.954	24.2283	24.3309	25.2981	27.1997	27.6547	25.9929	26.1711	28.2558	26.6866	27.603	29.2493	31.9965	34.3922	46.0405	58.103	70.587	75.1962	79.1733	78.4787	77.4406	80.3244	78.324	79.0451	76.0019	72.9973	73.3926	71.7434	70.0823	65.6875	65.9912	58.5482	61.1319	60.336	58.6159	58.2216	56.3018	56.6496	55.9197	54.3588	51.7334	49.4048	48.6811	46.3461	44.5029	44.4002
	44.9531	45.0877	45.5777	46.3072	45.5706	45.9563	47.6184	49.2536	50.5926	49.0549	48.4104	51.3037	56.9816	58.3362	56.6279	54.6177	53.2279	54.9253	55.8709	57.6509	57.0261	56.7837	57.0853	55.5415	57.4776	56.6818	57.0161	55.6317	55.5729	57.3007	57.0398	55.687	54.305	54.2778	56.0169	55.1003	55.384	53.7898	53.9474	52.3382	53.5081	53.8109	53.422	52.6007	50.8381	51.7298	50.1792	49.2289	50.383
	34.2326	33.8028	33.1408	33.1279	33.7615	33.928	34.1322	35.1984	35.8641	36.2607	36.3987	36.786	37.1833	37.3302	38.0041	38.7555	38.0189	37.4905	38.1504	37.6838	38.0037	37.608	39.0954	39.6832	39.7679	37.2732	37.0269	38.5553	37.8288	38.851	39.3777	40.1062	40.7173	40.8373	40.744	41.0123	39.8177	39.6129	40.1517	40.8648	40.8635	41.4	41.2412	40.5376	39.9236	40.451	39.7251	40.0048	41.7001
	40.587	39.8308	39.377	38.828	39.1131	39.9302	40.1999	41.2925	41.6828	42.087	42.5125	42.6492	43.541	42.8306	44.0912	44.7402	44.4198	44.1525	44.2866	44.2018	44.2124	44.0101	45.3954	45.6697	47.0295	44.2478	44.0145	45.5876	44.7366	45.526	46.2131	47.4752	47.6882	47.5546	48.2739	47.6907	46.7678	47.238	47.1392	48.2275	48.9474	48.6589	49.5147	48.1429	48.0289	48.8968	48.1822	48.3403	49.852
	23.9583	23.3071	23.2052	23.0812	23.4699	23.7919	24.3061	24.8713	26.2393	26.94	27.4619	27.9635	28.2996	29.0449	29.5475	29.6744	29.2033	29.196	29.4474	28.9004	29.7648	29.3745	30.384	30.558	31.1703	28.8788	29.1633	30.2685	29.1858	30.5365	30.5891	31.4607	32.6928	32.3347	32.031	32.142	31.4553	31.1526	31.8794	32.5886	32.2392	32.8096	33.0033	32.5734	31.8457	32.2198	31.4767	32.0621	33.1856
	37.6331	37.1011	36.8709	36.5227	37.2981	37.2052	38.1261	39.0794	39.5948	39.7934	39.6973	40.4559	41.1542	40.8944	42.5497	42.6496	42.4618	42.0814	42.5183	41.9645	42.2242	42.0485	43.0876	43.9066	44.5646	42.1912	42.2503	43.7827	43.1398	44.3923	45.0502	45.332	46.2602	46.3293	46.2465	46.4921	45.2918	44.5603	45.301	46.906	46.8566	47.1273	47.205	46.3989	45.9878	46.1472	46.1449	45.9237	47.6432
	38.169	38.4374	37.6267	38.1694	38.5891	38.5663	39.2688	40.0575	40.6961	41.3268	41.1467	41.0263	41.5	41.7768	42.2961	43	42.8346	42.6064	43.4047	42.7147	44.1563	43.8426	45.1019	45.7238	44.9301	42.522	42.9236	44.6272	43.5414	44.4185	45.0939	45.6681	47.282	46.7051	47.271	47.5738	46.3812	46.2675	47.016	47.9741	47.9563	48.8182	48.7537	48.0519	47.8341	48.37	48.3782	48.657	49.9149
	28.9852	28.4671	28.2088	28.3597	28.7827	28.9932	29.0247	30.5209	31.2588	31.4735	32.1372	32.404	32.4362	33.1429	33.6497	34.4235	33.9413	33.6315	34.318	33.4013	33.3811	33.2361	34.9774	35.3715	35.4784	33.8294	33.6861	36.2316	34.8502	35.9882	36.1428	36.5536	37.9425	38.2452	37.1835	37.7831	36.5539	36.1226	37.0246	38.0946	38.3951	38.9251	38.8875	37.8011	37.2701	39.0301	38.0391	37.8969	39.7401
	58.1005	57.1113	56.5316	56.5661	57.5268	58.4639	59.0509	59.5943	60.3709	61.4104	61.2666	61.5355	62.2268	62.6884	62.8764	63.8761	63.2311	62.8058	63.5144	63.0575	64.1902	63.2779	64.4588	65.816	65.1582	62.0476	61.9852	64.3689	63.2535	64.8244	65.2835	65.7246	67.7347	66.5326	67.8417	67.0012	65.6849	65.9091	67.1989	67.7358	67.5028	67.8617	68.0184	67.4336	67.3442	67.767	66.9121	66.349	69.1118
	36.6622	35.6823	34.9894	34.6934	35.3856	35.849	36.4209	37.235	38.3583	39.0047	39.0061	39.4492	39.6337	39.6461	40.638	41.1037	40.6711	40.3652	41.2538	40.1117	40.7032	40.2039	41.9291	42.182	42.2313	40.1475	40.1883	42.5027	41.5161	42.2579	43.1593	43.7465	44.6559	44.715	44.5943	43.7417	43.5642	43.1014	43.9709	45.0422	44.6381	45.2378	45.142	44.0364	44.0429	45.0323	44.1022	44.0264	46.0437
	42.3732	42.0703	41.4313	40.471	41.9683	42.2097	42.4868	43.4245	43.8669	44.7463	44.6009	45.5088	45.4165	46.1416	46.4297	47.109	46.3192	46.4795	47.4173	46.7978	46.8751	46.5173	47.8086	48.1217	48.6639	46.011	46.22	47.9824	47.1906	47.9917	48.6713	49.2003	50.4247	50.0666	49.9571	50.0448	49.1782	48.9848	49.8717	51.0714	50.6126	51.0925	51.5491	50.8308	50.5766	51.6417	50.1989	50.3061	51.9969
	50.351	49.5884	49.7979	49.3808	49.6774	50.5403	49.9153	50.9235	52.1296	52.5481	52.0265	53.3493	53.3786	52.8995	54.6335	54.2009	54.1299	53.6239	53.7263	53.2635	53.1945	53.0882	55.2468	55.0071	55.2527	52.8469	52.63	55.0741	53.9003	54.5429	55.8413	55.506	57.4636	57.5909	57.0048	56.894	55.9572	55.5011	56.354	57.2516	56.6136	57.7338	58.226	57.1307	56.7699	57.2367	56.4916	55.6801	57.8376
	27.8916	26.9515	26.6545	26.2557	26.8035	27.341	27.8909	28.3717	29.4235	29.9196	29.3131	29.7153	30.3272	30.2458	30.9494	30.601	30.6402	30.241	30.6379	30.4951	31.0209	30.8388	31.7863	32.4369	33.8045	30.9394	31.2101	33.0204	31.8713	32.6554	33.1124	33.1062	34.0055	33.7839	34.0673	34.2672	33.3804	32.6182	33.6598	34.7448	34.515	34.5593	34.6037	34.4176	34.1444	35.2461	34.3194	33.9864	35.8215
	36.6135	36.0748	35.045	35.0388	35.2506	35.4282	36.0307	36.7093	37.3462	38.2895	38.036	38.5047	38.6189	38.7914	39.4953	39.6172	40.0498	38.911	39.5169	38.8245	39.5206	38.8929	40.3421	40.6563	41.3963	39.2913	39.6924	40.7247	40.3886	41.4999	41.5033	41.9534	43.0458	42.9584	42.4174	42.606	41.5273	41.8299	42.8242	43.3832	42.7459	44.1274	43.8215	43.1833	42.6107	43.3301	42.3758	42.4505	44.2642
	34.371	33.8907	33.3217	32.3948	33.5849	33.7458	33.9729	34.7521	35.6643	35.6206	36.0246	36.5635	36.9325	36.6936	37.3384	37.8891	37.5388	37.1718	37.6782	37.232	37.0696	37.309	38.2654	38.9435	39.6097	37.3166	37.4015	39.0772	38.7286	39.1066	39.8842	40.0929	41.0457	41.0545	40.6673	40.631	39.9832	39.3841	39.4688	41.0039	41.1085	41.6685	42.0817	41.616	40.3235	41.4946	40.2968	40.8124	42.0542
	50.6265	49.7888	49.405	48.1466	49.3628	49.6934	50.1311	52.1041	52.3923	53.4299	53.2161	53.2738	53.4654	53.7912	54.379	55.1966	54.5749	54.3779	55.6448	55.0857	55.9758	55.1351	56.3242	56.8764	56.0997	52.9066	53.0563	53.9028	52.3648	54.5064	55.0702	54.5411	55.6832	55.5082	56.5648	55.8494	55.1283	54.8793	55.5591	57.388	56.7209	56.7822	57.0937	56.8522	55.7644	56.9848	56.7188	56.5357	57.9557
	59.6955	59.6437	58.4883	58.3814	59.1828	59.807	59.6761	61.6228	62.8163	64.2192	63.7919	64.1437	64.6292	64.7799	65.745	66.3134	65.2445	65.5005	65.6395	65.4388	65.6909	65.8319	66.4027	67.4837	67.4887	65.3779	65.1394	66.8815	65.6958	66.9992	67.6899	68.3571	69.4726	69.6813	69.7474	70.02	68.8012	68.1245	69.6011	70.5736	70.504	70.4398	70.9551	70.4143	70.0006	70.6214	70.2124	68.8333	72.013
	36.936	36.3377	35.4749	35.5423	36.0698	36.8075	36.5791	38.1217	38.4818	39.1929	39.2795	40.0215	40.2506	40.1672	41.3564	41.327	40.9556	40.1745	40.8588	40.1277	40.5982	39.805	41.6995	41.4685	42.1511	38.9298	39.4147	40.9374	40.1939	41.3327	41.5688	41.8677	42.9765	42.6269	42.8799	43.1431	42.4702	42.5971	42.8885	43.1483	43.702	44.1854	43.6004	42.9864	42.491	43.2277	43.068	42.8107	44.5599
	39.6317	38.8446	38.2815	38.4535	38.6117	39.0826	39.7429	41.2818	41.6257	41.7695	41.971	43.2747	43.0358	43.1593	44.5127	45.0812	44.6564	44.3942	45.2194	44.8523	45.009	45.0304	46.9121	47.3217	47.4916	45.6921	45.4534	47.5688	46.8927	47.5447	48.2138	48.4226	49.3563	49.6498	49.2635	49.2207	47.8098	47.5514	48.5306	49.6808	50.0183	49.9938	50.8779	49.6685	50.1286	49.802	49.9272	49.9261	51.9507
	50.8586	49.976	49.7709	48.6152	50.0199	49.6679	50.978	51.8848	52.4385	53.3535	52.9555	53.0424	53.0035	53.1896	53.9408	54.335	54.1354	54.3807	54.3887	53.8531	54.2811	54.1618	55.0143	55.9808	55.5724	53.1555	53.1744	55.2232	54.3576	55.5962	56.2302	56.3289	57.3748	58.4996	58.0925	58.038	57.23	56.4674	57.5886	58.3798	59.0412	58.4664	58.9265	57.8331	57.6682	58.1754	57.8395	56.5997	59.4026
	59.288	58.6715	58.363	58.1946	58.8064	59.7371	59.5918	60.7363	61.9186	62.1796	62.9086	63.1063	63.4359	63.6958	64.6231	65.6689	64.9895	65.0445	65.8497	65.1455	65.2486	65.2407	66.4261	66.7376	67.2194	65.2168	65.3524	66.9522	65.6088	66.9603	68.0235	68.528	70.2709	69.2306	69.8045	70.0302	68.9589	68.7182	69.2288	70.4622	70.36	70.4291	70.6069	69.9301	70.383	70.8324	69.8789	69.9254	72.0318
	40.5323	39.4445	39.1008	38.6296	40.0033	39.8608	40.729	41.767	42.5093	42.8492	43.2022	43.092	44.3057	44.3271	45.4419	45.9718	45.4861	45.878	46.5559	46.1743	45.9755	45.657	46.7737	47.0231	47.928	45.5054	45.5268	46.4739	46.3031	47.347	49.0824	49.1342	49.6751	49.8928	49.4842	49.8992	49.4008	49.4763	49.9947	50.8193	50.2617	51.163	50.7594	50.1738	50.4599	51.5451	50.0471	49.7983	51.8564
	57.1817	56.9931	55.3788	55.3113	56.6148	57.098	57.0683	58.3102	59.4705	59.9878	59.8978	60.9258	61.4016	61.3432	61.9761	62.8793	61.8416	62.3296	62.8455	61.7509	62.4811	61.6065	63.2761	64.0064	64.9102	62.9535	62.487	65.0284	63.7677	64.712	65.3344	66.3879	67.0499	67.4092	67.2102	67.4079	66.4828	65.6984	67.1097	68.0693	68.6624	68.1959	69.5151	69.2676	69.2277	69.5372	69.2118	69.0098	70.4883
	65.8063	65.3625	64.516	64.5327	65.4553	65.2784	66.15	66.7273	68.0699	68.4631	68.1197	68.5343	69.2426	69.9552	70.315	70.8107	70.5619	70.1512	71.1022	70.129	70.3945	70.7109	71.4043	72.1775	71.604	69.1119	68.8632	70.7878	70.0986	70.9199	71.6201	72.2015	73.3221	73.1264	73.0077	72.8857	71.8252	71.7019	72.6483	74.0999	72.924	74.3971	74.2797	73.3462	72.979	73.9512	73.6703	73.3234	75.5703
	78.2833	79.0099	77.5297	77.801	78.0162	78.5112	78.9418	80.342	80.5782	81.7349	82.194	81.54	81.9678	81.9542	83.5756	83.957	83.4	82.3275	82.6003	81.7523	82.6853	82.0199	83.7488	83.5011	84.3172	80.2559	80.2192	81.8333	80.5845	81.5666	82.277	83.2154	83.5608	83.9391	83.8903	84.2736	83.5509	83.1941	83.8019	84.6267	84.0137	84.143	84.1591	83.7145	83.6078	84.7772	83.9503	83.4043	85.1876
	64.5331	62.5348	62.4124	61.9906	62.9963	63.2061	63.9181	64.4211	66.6249	66.0181	66.0798	66.8264	67.357	67.3205	68.9073	68.5385	68.2151	68.3358	68.4082	67.2624	68.7978	67.5613	69.926	69.4939	70.3859	67.2739	67.3282	68.8604	68.2837	69.2277	70.0104	70.6547	71.7041	72.3146	72.2798	71.864	71.2743	70.746	71.8919	72.3123	72.2062	73.2204	72.3168	72.4145	71.9729	72.6616	71.4623	72.0795	73.4768
	38.559	38.8144	37.9175	37.8243	38.2241	38.6133	38.3617	40.1945	41.0994	41.8727	41.5007	42.2594	42.4388	42.8322	43.3199	44.0315	43.4468	42.8341	42.8694	43.1547	43.2366	43.1037	44.9556	44.6399	46.3465	43.8444	44.3827	44.8787	45.2583	45.61	46.0493	46.5212	48.1032	47.6279	47.5614	47.5572	47.1688	47.4828	47.3559	49.2354	48.7645	49.2723	49.5826	48.7371	48.3237	49.8181	50.012	50.7501	53.0437
	14.3586	14.1842	13.485	13.3044	14.1513	14.5662	14.5863	15.2898	16.0441	16.0241	15.9111	16.8194	17.2325	17.4276	17.8136	18.0281	18.2454	17.6081	18.2407	17.5631	17.7141	17.6166	19.0248	19.422	20.8737	18.1095	18.0061	19.4688	18.6091	19.6605	20.4204	20.6161	21.5457	21.0242	20.8192	20.884	19.6634	19.8622	20.2083	21.56	21.2447	21.4472	21.782	20.8365	20.1934	21.1931	20.2037	20.1805	21.8792
	45.8366	45.8848	45.3666	45.1141	46.3974	46.6116	47.1564	47.6685	48.6442	49.403	49.1323	49.4937	50.8419	50.4097	51.0576	52.0928	51.416	51.1936	51.7478	50.8763	51.6408	51.5965	53.079	52.7736	53.38	50.4834	50.3095	51.8596	51.017	52.4476	52.3524	53.8067	54.4293	54.5645	54.6172	54.2341	53.3807	53.3078	54.0767	55.1937	54.6285	54.8983	55.8904	54.7996	53.8927	54.8726	54.3492	54.5531	55.779
	47.4209	46.6798	45.7524	45.8212	46.8892	47.0543	47.7492	48.4227	49.4916	50.408	50.1363	50.1421	51.2308	50.8328	52.0554	52.3906	52.3524	52.5664	52.7777	51.8489	53.0833	52.9976	54.1219	54.8542	55.2088	52.8579	52.8324	54.2072	53.8994	54.5462	55.1853	55.7425	56.5676	56.5798	56.9776	57.2379	55.4458	55.2617	56.5941	57.8407	57.4357	58.0557	58.486	57.3279	57.1202	57.3862	57.2301	57.051	59.2766
Time (s)	0	2	4	6	8	10	12	14	16	18	20	22	24	26	28	30	32	34	36	38	40	42	44	46	48	50	52	54	56	58	60	62	64	66	68	70	72	74	76	78	80	82	84	86	88	90	92	94	96
[truncated: 102 more columns]

## Sheet: Panel C
	Time (s)
NS shRNA	0	14.6975	16.8768	20.1857	21.923	18.9818	17.6981	22.8288	19.6792	23.3225	17.6264	22.092	22.281	18.6562	24.5182	23.6503	21.5657	16.6682	19.5561	19.6683	23.3706	21.687
	2	17.5008	18.0428	20.9599	20.2783	19.7709	18.9998	24.6449	21.9115	23.3095	19.6108	23.8072	24.4669	20.2622	25.5665	23.6974	22.0575	16.6958	22.4379	20.2428	20.433	25.8335
	4	14.342	16.6561	20.4765	21.1687	17.8489	18.5302	20.7107	19.5374	22.7273	19.4837	22.6171	22.0291	18.3896	24.2618	24.6064	20.2833	16.5915	21.0751	19.0523	22.6785	24.2767
	6	14.6975	16.8768	20.1857	21.923	18.9818	17.6981	22.8288	19.6792	23.3225	17.6264	22.092	22.281	18.6562	24.5182	23.6503	21.5657	16.6682	19.5561	19.6683	23.3706	21.687
	8	17.5008	18.0428	20.9599	20.2783	19.7709	18.9998	24.6449	21.9115	23.3095	19.6108	23.8072	24.4669	20.2622	25.5665	23.6974	22.0575	16.6958	22.4379	20.2428	20.433	25.8335
	10	14.342	16.6561	20.4765	21.1687	17.8489	18.5302	20.7107	19.5374	22.7273	19.4837	22.6171	22.0291	18.3896	24.2618	24.6064	20.2833	16.5915	21.0751	19.0523	22.6785	24.2767
	12	14.6975	16.8768	20.1857	21.923	18.9818	17.6981	22.8288	19.6792	23.3225	17.6264	22.092	22.281	18.6562	24.5182	23.6503	21.5657	16.6682	19.5561	19.6683	23.3706	21.687
	14	17.5008	18.0428	20.9599	20.2783	19.7709	18.9998	24.6449	21.9115	23.3095	19.6108	23.8072	24.4669	20.2622	25.5665	23.6974	22.0575	16.6958	22.4379	20.2428	20.433	25.8335
	16	14.342	16.6561	20.4765	21.1687	17.8489	18.5302	20.7107	19.5374	22.7273	19.4837	22.6171	22.0291	18.3896	24.2618	24.6064	20.2833	16.5915	21.0751	19.0523	22.6785	24.2767
	18	14.6975	16.8768	20.1857	21.923	18.9818	17.6981	22.8288	19.6792	23.3225	17.6264	22.092	22.281	18.6562	24.5182	23.6503	21.5657	16.6682	19.5561	19.6683	23.3706	21.687
	20	17.5008	18.0428	20.9599	20.2783	19.7709	18.9998	24.6449	21.9115	23.3095	19.6108	23.8072	24.4669	20.2622	25.5665	23.6974	22.0575	16.6958	22.4379	20.2428	20.433	25.8335
	22	14.342	16.6561	20.4765	21.1687	17.8489	18.5302	20.7107	19.5374	22.7273	19.4837	22.6171	22.0291	18.3896	24.2618	24.6064	20.2833	16.5915	21.0751	19.0523	22.6785	24.2767
	24	14.1788	16.1497	20.7413	19.4466	21.5167	17.8573	20.2539	18.5541	23.0517	18.4984	22.0014	22.6435	18.0239	23.8593	24.2166	21.4231	17.3201	21.4138	18.8847	24.9931	22.3667
	26	13.7525	15.9255	19.9337	19.1109	19.73	17.0589	21.3135	18.4143	23.3663	19.8261	19.4349	22.0045	17.8703	22.7313	24.8281	20.708	14.4469	19.9453	17.695	21.1188	24.265
	28	16.5387	16.8639	20.4693	20.4892	20.2021	20.2619	21.7102	19.1613	21.9275	20.8804	23.2853	24.829	18.2819	25.0491	22.5104	22.1326	15.1395	20.9782	20.065	21.6954	24.3428
	30	14.1396	15.4639	23.6467	19.0985	18.5711	17.4396	21.5748	19.9631	22.84	17.4387	19.9922	23.1238	18.0937	21.4555	22.9356	18.4946	17.859	18.3295	17.877	20.1448	25.2739
	32	14.3682	16.5413	19.9864	18.4813	21.0691	17.2002	21.3443	18.0257	22.9776	20.6044	21.7375	22.6505	19.1267	24.3204	24.4447	22.1864	13.8622	17.7761	18.9941	21.2487	23.1466
	34	14.8282	16.2084	19.3346	17.8518	20.1733	19.9343	20.9771	17.6573	19.9006	18.9212	18.5491	21.4995	17.7375	23.4611	21.8175	18.4719	16.5512	19.6906	18.5781	20.7605	24.6097
	36	14.7806	16.3555	20.9393	19.5716	21.2834	18.4964	20.052	18.314	23.0442	17.2536	19.205	22.4497	19.0404	23.6856	23.407	17.456	15.2368	19.5647	17.353	21.2885	23.3268
	38	13.726	15.662	20.9584	18.947	17.642	18.2373	22.5943	17.6309	20.2944	17.7251	19.4274	21.9396	16.8967	23.0092	20.4528	19.0776	14.5847	18.5762	17.0099	21.8171	23.7876
	40	15.9214	17.217	18.4347	19.8409	20.9803	17.9816	20.3279	16.6418	23.5153	21.3142	21.9519	21.4665	17.1115	23.7668	25.8909	20.2578	14.9593	19.285	18.3156	20.6256	23.6256
	42	14.9952	15.3191	20.3814	19.2233	19.1321	18.3537	19.8361	18.0028	20.6717	17.4277	20.0348	21.5704	18.2702	21.6129	22.2332	20.0537	14.8355	19.2436	17.2456	20.5882	19.9636
	44	14.8757	16.622	20.5798	20.0926	19.7013	16.7893	23.4051	19.3312	22.3178	19.06	20.0055	23.3143	18.4423	23.2308	22.8999	21.1529	19.413	20.4074	19.037	21.6238	25.6075
	46	14.3728	14.9539	20.044	17.3669	19.0278	18.4951	22.9822	16.2823	19.491	19.5913	21.5246	20.9682	17.5318	23.4893	22.8932	19.3549	16.4383	19.0618	18.1095	18.0198	20.5389
	48	16.2667	18.5731	25.5187	20.1338	21.4208	18.796	23.8415	18.6802	22.1815	19.8477	21.3526	20.2527	18.3244	22.754	23.0984	23.365	18.2742	20.1223	19.4113	22.2331	26.9322
	50	16.3938	18.873	22.9036	20.578	21.3033	19.1287	20.98	18.7656	20.5203	19.3491	20.9832	21.936	18.6089	21.2642	24.7197	20.2438	17.2202	20.3466	18.02	20.2813	26.0452
	52	17.6328	19.5798	20.867	21.2686	22.3266	18.5982	23.8766	18.505	19.1627	19.7991	22.8365	21.8519	19.2385	23.0595	25.0034	20.9283	17.9878	20.3378	19.7331	21.2626	23.8773
	54	19.0553	19.6411	20.7357	21.8527	20.7293	19.4403	22.364	18.936	26.5793	19.9751	22.0866	24.5367	19.3504	22.5236	26.9703	20.6682	20.8832	21.346	19.685	22.9959	24.0038
	56	18.1581	23.0546	23.0748	22.5706	23.2887	19.1883	22.4916	20.2125	22.1179	23.3363	23.0351	23.4384	19.5589	25.5985	23.7979	23.2297	20.7196	21.0722	19.5414	23.1353	26.6329
	58	21.0021	18.9647	28.2251	25.3733	24.9004	21.9054	24.8885	19.4556	24.1305	20.9847	22.7468	21.9826	20.6371	24.134	26.6944	23.3553	20.1753	21.3436	21.2719	23.719	28.2499
	60	17.9795	22.0769	25.3787	25.3459	23.5367	22.6855	25.889	18.3735	25.032	21.6124	24.8578	23.6658	24.9269	24.2636	28.5835	23.1712	22.9747	23.9955	21.8111	23.2262	28.8189
	62	20.8563	22.3407	24.6333	26.1591	24.3643	22.8705	23.0932	19.975	24.3245	21.6479	20.7458	24.0125	25.389	26.9624	25.3375	21.6555	26.4003	24.5932	21.5647	24.6162	29.6062
	64	21.8581	22.0728	29.3291	25.2218	26.9562	20.8363	34.1074	20.179	24.8856	21.9469	24.0063	27.241	24.477	26.9101	31.3598	27.3656	20.2243	23.2967	21.0898	26.3393	31.8217
	66	25.7098	25.3925	25.5902	27.0726	24.4464	23.9811	33.5721	20.871	25.6478	22.0105	24.3455	26.8212	24.4265	26.4527	31.4663	25.9146	26.0856	24.2324	20.9673	24.9776	33.5845
	68	25.9246	21.4691	23.7421	29.1383	27.354	22.6984	37.1279	22.8596	27.3784	20.7398	26.8764	28.2365	28.0761	28.6547	35.1846	29.0583	26.0419	24.3095	23.7047	24.5547	33.7773
	70	24.6731	24.3549	29.7503	28.519	29.0065	24.9249	37.3817	21.9249	27.6577	23.4795	25.622	28.7479	26.4263	29.6248	34.9124	26.0482	28.3713	24.9823	23.4434	27.5468	38.2452
	72	25.4931	22.8103	34.1243	24.7737	28.5377	26.44	37.47	23.6949	26.494	27.6124	29.0489	30.3678	26.6494	29.4944	35.4433	26.6408	33.1403	30.9252	23.8532	28.9578	42.4893
	74	30.9016	27.4756	29.8458	29.9174	29.4623	25.9119	35.6922	25.6004	29.1088	23.8376	28.3729	31.6133	29.9857	32.3591	36.3512	28.5626	30.1443	27.6536	24.3741	29.3783	38.4071
	76	28.2083	26.5383	29.2055	31.6908	31.5826	31.3039	36.7951	24.3108	32.9921	28.2387	27.7891	32.4335	32.341	32.7945	34.9608	26.6606	33.7781	29.1698	25.7171	32.1049	48.9326
	78	25.9447	29.0002	28.9856	31.3199	31.7459	29.1893	42.0274	26.5154	26.5485	26.749	28.6248	33.7801	31.2695	31.5082	42.0893	30.5723	27.9684	29.1289	27.1886	33.4836	44.0398
	80	32.8352	25.4591	37.6682	32.0506	34.6895	29.3744	41.7522	28.8498	33.0313	26.177	31.9861	31.2973	32.4066	33.8486	32.6589	33.9943	32.6802	31.268	25.1441	34.2558	42.4272
	82	29.5685	29.5412	30.8055	34.2857	35.9775	32.0381	42.0649	28.2934	33.8132	27.056	29.4229	33.1697	32.3817	32.5304	33.9619	27.3383	41.0076	32.3307	26.6135	33.0476	46.8196
	84	30.374	36.6963	34.7545	40.7904	39.3949	31.2724	49.6927	30.4851	33.253	26.4402	27.3407	37.4623	36.5744	38.9324	41.8592	35.3046	38.9667	33.755	27.7325	34.0198	50.8289
	86	33.5459	28.9324	31.9737	36.6362	37.1214	31.83	41.8194	27.9117	32.2543	28.6047	29.873	36.4463	32.6578	35.3561	40.7112	29.1306	35.6467	35.5442	28.8955	33.3184	46.5438
	88	30.7122	31.1533	30.1201	33.3463	36.1367	34.5327	40.304	30.1547	34.8612	26.7066	27.611	37.5752	34.1181	33.647	39.0594	26.4842	45.5019	33.2698	29.2233	33.5956	49.3772
	90	32.3087	29.6545	33.6039	34.9672	38.8094	34.131	42.2803	30.4183	31.7497	30.0401	32.6223	38.3532	36.8958	35.8247	46.3041	31.7591	37.8792	35.6855	30.0011	41.5488	56.5536
	92	37.3111	35.4847	35.4884	44.1779	43.5834	33.7126	41.5436	30.6133	32.0673	30.5556	33.4863	40.1874	36.8669	34.5523	38.6044	29.6849	40.312	36.9655	26.1652	36.0275	54.2317
	94	34.1487	37.4654	37.9742	39.7299	42.8289	32.9464	42.814	34.9375	34.6867	28.9056	30.3589	41.8019	38.4774	35.5926	45.5801	41.0336	43.249	38.8008	28.5724	36.7004	55.0084
	96	29.7052	36.7458	33.3979	36.618	33.8765	38.4438	39.5002	32.9752	34.203	30.8389	33.7867	43.7152	38.1103	37.0092	44.2223	29.5782	48.227	34.7148	30.1168	38.6749	56.61
	98	32.016	33.1956	36.8189	39.8786	38.5509	33.6287	45.542	35.1381	34.3257	29.6482	32.5663	43.1872	37.347	37.7432	39.9972	33.2082	42.3508	38.9899	29.477	36.3332	57.0771
	100	33.9148	33.34	41.2477	38.8894	45.7915	33.9795	43.5624	32.9133	36.4147	30.8814	35.6399	51.2735	37.5269	38.6279	41.4775	34.17	48.531	37.3791	33.8242	37.2128	56.8432
	102	34.1473	33.5258	34.7928	41.9056	39.1626	39.3211	46.5384	33.5728	35.3093	31.0143	34.0466	44.6248	45.0866	37.1982	44.218	30.7438	45.2456	39.9436	32.9766	36.4119	64.1844
	104	35.7927	34.5904	30.6132	38.6253	41.2914	36.8352	41.5385	34.4511	35.2979	30.1413	31.6691	49.4314	39.2767	36.5323	42.1083	31.5248	48.1319	39.7086	30.0413	38.1656	56.3459
	106	34.3301	36.9928	35.7675	43.9604	40.6222	35.8557	46.37	36.3036	36.9882	32.4165	35.5627	49.9617	40.8328	38.373	49.5308	36.4927	55.8898	41.2859	34.127	35.1129	60.1018
	108	34.6304	31.1866	33.678	37.7774	40.0913	41.3122	46.0804	37.353	38.1744	33.6467	36.1019	52.0107	46.8117	41.1144	43.7198	32.3827	45.9168	41.0407	32.4802	41.9116	63.8069
	110	36.5084	38.0222	34.1971	36.5044	40.6965	44.2143	44.7127	38.9599	35.5752	36.2045	33.0723	52.3518	42.2282	37.5632	47.1072	30.2117	43.958	39.0001	31.4197	39.4246	68.2735
	112	33.1801	34.5124	35.652	41.0726	37.9407	38.4249	43.0248	37.6133	39.3265	35.51	38.8902	53.982	40.2662	36.7127	49.0445	43.7269	53.2434	42.0904	34.1331	39.5738	63.8087
	114	34.3042	37.1367	34.6046	42.4146	37.112	39.3059	42.5729	41.4402	34.3383	30.7854	34.9279	54.9493	44.7679	37.4536	47.1276	39.5222	43.0454	40.2864	31.9033	40.71	64.7974
	116	31.1132	31.9821	33.7849	43.7001	43.9361	42.2636	48.6437	38.8838	37.1179	33.4258	33.2296	55.9723	45.409	39.9174	48.1884	36.5471	49.6632	41.9577	33.2535	36.8235	64.5551
	118	36.7992	38.9768	34.6188	42.5413	44.1944	38.1003	45.9235	40.8616	40.8643	33.9979	38.5438	56.2926	48.1391	38.9343	56.4157	30.468	54.0049	41.8084	34.5859	40.9862	68.0376
	120	40.0682	43.7713	34.4156	40.1379	47.3482	40.5544	44.8365	40.5508	35.0759	34.7903	36.2145	59.2906	43.0025	36.7607	48.1958	44.6859	44.3739	46.5317	37.8714	46.0349	68.1619
	122	35.6345	37.5493	37.5435	39.433	43.1585	39.4551	44.9531	47.277	43.9221	34.8215	37.8903	60.0605	45.6251	39.295	51.0102	37.2929	46.9008	42.7529	32.1577	39.2331	62.3275
	124	32.4593	38.706	32.5131	43.8481	48.5163	39.5058	41.2127	47.1236	36.3177	33.6689	37.5456	62.0768	47.6234	39.7694	45.7178	34.8074	48.0447	43.9403	35.5204	40.9104	68.743
	126	34.9264	40.9389	35.6925	44.3316	41.8078	37.3231	43.7458	40.969	36.0305	34.731	39.982	58.5728	41.51	37.7782	43.5504	35.6268	48.1305	39.7815	36.5563	43.7134	65.0159
	128	35.3499	37.5697	34.6807	41.0585	43.0424	45.3427	44.5142	47.4356	39.0766	42.9786	39.093	61.248	51.7321	38.7384	46.8987	38.362	56.6559	48.0503	35.9027	40.5892	54.0876
	130	35.1892	37.782	33.0658	35.2828	43.1806	41.0178	38.5284	45.1613	37.7676	33.3166	38.2544	59.7701	53.7691	40.6922	47.0815	40.2706	45.2786	46.1759	35.8502	43.5945	70.5419
	132	36.5712	36.7806	35.4515	39.9686	39.7538	40.9883	40.7946	43.1132	37.6365	35.7518	38.7698	54.865	51.2468	39.0498	48.5155	39.7609	52.7329	46.5728	35.9361	41.6533	61.2511
	134	36.377	38.9002	38.0326	48.476	41.6188	37.8752	37.5766	47.2663	30.7985	38.7204	39.3634	60.04	52.501	40.5221	47.6731	39.5816	49.9975	41.9529	33.7482	40.465	71.2091
	136	37.9949	35.2718	34.0116	44.4094	40.8699	39.8883	44.0586	47.3843	43.677	38.3977	37.8391	68.1531	50.0265	39.0099	45.1363	37.3008	67.1143	43.9934	34.9624	43.1967	61.3587
	138	37.9784	38.0568	32.3257	45.8957	40.7571	41.0931	37.0827	44.4019	37.6256	36.9153	37.8592	66.3997	52.8101	38.0557	44.2761	42.1842	54.7805	41.3451	36.86	35.8953	71.0188
	140	33.6093	37.9863	41.8547	45.685	46.266	42.1099	38.6973	49.39	42.6197	37.9459	39.5611	70.9261	52.4334	40.553	48.035	41.1198	51.9172	46.5444	37.6812	49.0835	64.7214
	142	35.2824	35.6073	31.4395	41.5369	44.1847	39.3304	37.7493	46.2051	32.2076	34.9166	38.8435	66.2692	51.4617	37.0453	49.6415	39.6486	50.0005	44.1513	31.9068	34.7295	59.6195
	144	34.5496	40.8253	37.858	44.4494	50.7153	43.7063	40.6328	44.9983	37.8839	35.3224	39.695	69.9149	48.2866	41.5808	47.892	41.5768	53.1623	42.2925	34.6427	43.4007	67.4252
	146	36.0642	35.8762	36.0435	38.2753	49.4614	37.5113	38.4385	47.9393	36.5908	39.0483	35.5727	64.0598	49.1994	40.7972	54.2549	36.3468	52.2959	44.6681	35.2675	40.9824	68.984
	148	30.7919	37.9738	35.7285	40.7444	38.8533	42.9712	35.79	46.5238	38.4251	37.8127	37.0041	60.0505	46.7505	35.9876	51.8695	39.1002	51.1714	40.6572	39.6296	35.0004	63.7169
	150	29.4337	35.1117	32.573	39.776	41.3272	37.7421	35.7074	44.9379	36.0798	34.96	34.5509	68.7838	44.5512	37.1645	44.497	38.7173	57.4003	40.2133	33.8207	40.6815	63.0058
	152	29.4437	36.9422	33.132	45.6363	42.8217	37.4862	39.6781	48.3279	37.2447	38.2395	39.872	70.2902	44.811	40.7108	47.4143	28.8052	51.9492	39.3581	36.5177	36.5457	66.7449
	154	31.7256	41.5367	34.8086	42.7619	39.2156	39.5969	36.7896	52.1892	33.0076	33.6821	41.4066	69.2679	46.9831	35.7674	44.5756	35.3566	47.1029	42.4655	35.8342	35.4563	71.3535
	156	33.4465	40.1378	35.2317	44.429	39.2123	39.4823	36.0578	44.7678	30.8978	35.8066	41.859	67.4734	56.3022	41.5347	49.206	34.8864	54.428	40.9895	33.4448	40.3659	60.8311
	158	32.7015	32.0596	30.1572	36.286	38.7018	37.5683	34.487	45.0857	37.1421	31.5552	37.4871	64.4851	43.8062	37.5862	45.0727	32.7731	46.5138	37.7811	32.3483	35.2408	63.4334
	160	32.659	43.2268	33.5429	43.3134	41.661	35.7992	38.4548	49.0029	38.6367	35.2142	38.974	66.9595	51.3949	37.9794	45.9211	31.9766	57.4193	41.4449	35.5887	37.5525	66.8901
	162	30.477	36.5954	31.6772	43.5674	42.6839	39.5524	35.8904	48.2621	35.358	31.925	38.6832	65.5949	46.5958	37.8148	47.6053	31.7556	47.655	42.9262	32.1664	33.283	65.2692
	164	31.2532	36.9304	32.2895	45.3619	40.6045	37.4748	36.3142	48.0255	35.4443	34.3462	35.7598	66.507	49.3782	38.2296	44.802	36.6246	34.2817	42.3352	33.7466	39.088	61.4542
	166	33.9714	36.6258	37.4857	40.4521	38.9295	42.0413	32.8176	41.863	40.4091	33.3566	34.5782	67.6602	50.2809	33.5919	48.4966	27.0016	50.2087	40.0898	33.8282	31.8445	59.3953
	168	36.1095	36.24	39.4492	42.0585	39.0339	40.6869	34.7889	48.1224	37.3063	35.6297	38.0178	69.3057	41.8359	37.2725	48.9333	32.9322	54.611	40.3246	36.2745	40.3264	60.767
	170	30.5092	35.5985	26.2614	37.2553	37.4976	36.8691	34.3316	44.7576	30.3278	34.5237	34.2194	63.686	47.8467	36.9354	43.9051	35.0982	44.5241	40.6171	32.3922	33.4212	59.2072
	172	32.7186	38.573	34.2982	41.0625	41.8806	36.8156	36.0421	49.4328	35.9391	35.5488	35.4677	61.9173	45.6754	36.4888	44.7218	30.4407	40.9826	39.7441	35.5846	39.1772	62.3233
	174	28.0048	42.2771	31.7375	40.2078	38.1442	38.536	34.9824	48.0722	34.6291	37.504	32.5839	59.9588	51.1992	35.2816	47.7332	29.5878	41.8995	42.0048	34.7808	37.6702	56.0868
	176	31.7235	36.0931	32.6808	43.9739	42.1394	39.4724	34.5357	46.2285	35.0554	37.7009	35.4153	66.7569	50.3821	37.053	48.7511	38.1793	55.877	41.2885	32.1	35.9265	70.0875
	178	29.2799	34.3977	33.2119	42.359	42.7602	39.2627	35.4761	45.3558	36.2122	34.1161	36.2184	61.4836	45.5215	34.8944	42.3068	35.1859	47.287	41.2257	31.4185	35.9203	63.5263
	180	29.562	32.8872	30.4417	40.6543	37.7217	35.4348	37.1489	44.1694	34.8062	30.3368	36.9834	70.9231	47.6484	34.3249	47.814	36.3424	51.0011	40.158	33.6377	37.0526	60.0522
	182	31.4816	40.6645	30.9298	39.5238	39.7083	37.1493	34.7756	49.1379	37.4634	31.6482	35.7182	66.0513	50.3968	38.2291	41.1462	34.356	54.5698	41.4121	31.8936	36.3849	59.8199
	184	32.0751	35.1969	31.8622	38.731	38.7579	35.8801	31.2583	48.2127	29.6991	31.6142	35.1637	64.8176	42.869	34.0532	49.7588	41.3051	50.1618	40.6543	28.9125	31.5447	67.7073
	186	31.3097	30.5451	33.5975	29.6412	37.0311	35.6426	34.3564	52.6679	36.0783	29.3951	33.7081	64.942	48.1676	35.0547	47.5253	34.2935	48.4158	40.1377	32.1894	35.9637	55.6454
	188	31.3802	32.2015	31.1323	33.9339	39.7645	30.5336	31.8437	44.8793	32.3057	30.5651	32.9176	63.4933	47.5286	34.3161	45.7047	32.8336	40.8408	40.2503	33.4755	33.2477	59.9216
	190	33.6778	35.4552	28.588	36.8732	41.7786	33.4382	39.3984	53.1053	32.9307	32.1405	37.6948	67.3503	48.8052	37.0509	46.6641	38.3349	54.5539	39.8002	29.527	37.7105	60.3148
	192	29.5975	34.772	33.2502	36.0365	39.512	35.2729	31.4818	53.0131	35.7388	33.9559	34.6477	65.6311	47.9345	35.2843	40.0917	34.984	48.5849	38.5766	36.9571	38.6262	61.4929
	194	32.7701	34.034	32.454	31.603	37.3291	36.8975	33.4108	48.0772	36.5169	31.8565	32.1341	67.4791	51.5797	36.1953	45.474	36.6995	47.7114	39.3679	29.7111	37.1659	60.5215
	196	32.7738	39.4994	32.9967	38.4359	42.4016	32.2239	30.9884	45.196	32.8787	32.7662	31.6837	62.8871	45.8385	33.6199	46.6052	30.7058	39.7394	40.7807	32.9821	32.9834	60.3306
	198	33.5538	32.5204	32.1016	36.5962	36.8019	34.9202	33.709	48.9516	33.5828	30.9413	34.4597	62.6327	48.5844	33.8575	40.7453	39.4071	53.3492	41.0927	30.5973	34.0502	55.0846
	200	29.9281	33.3379	30.3427	33.9182	39.2326	33.8586	29.188	41.2335	32.4809	29.9266	34.9758	61.6044	46.6996	33.2479	42.3403	34.1821	44.6964	36.8695	32.4619	31.8029	54.8202
	202	27.0077	33.2623	26.8397	36.5834	36.4656	33.4597	30.0064	43.5065	33.9476	32.7294	32.7919	63.68	48.2548	31.5547	38.2084	30.3953	41.2499	39.0347	29.7798	31.9449	51.5383
	204	33.347	31.4636	30.8234	37.2374	36.4117	33.7929	29.911	43.4683	34.2562	31.6422	37.0897	68.4696	49.9491	34.162	41.0993	32.7113	42.9965	36.5857	29.8401	37.4928	51.743
	206	28.1114	38.7216	31.6179	36.9005	37.9352	35.6776	33.8588	42.25	34.098	32.7323	35.7515	64.5559	41.9365	32.2063	41.5482	28.3986	38.5567	39.1669	31.1256	32.0133	59.6298
	208	26.6444	30.9851	27.817	37.218	38.8884	35.1606	29.4025	46.1668	31.1822	29.0507	33.2847	59.3195	45.0115	32.2629	44.8171	30.4828	37.903	33.4907	30.1425	33.2326	50.8931
	210	32.4588	32.5831	28.5859	37.1625	40.3136	36.6607	32.3958	47.8107	33.3622	29.2579	34.0264	63.0486	41.6025	33.644	42.6147	33.4602	45.5256	35.8845	31.9774	32.7993	51.5287
	212	27.7616	32.266	27.4315	31.3129	37.252	37.2817	27.9269	51.0556	32.3116	33.4275	32.4322	62.8351	45.2882	34.25	38.4848	37.6562	40.1532	36.0381	29.6889	33.4575	49.6365
	214	27.2761	33.7518	28.0735	33.9839	40.8148	34.2765	31.9581	44.0402	32.0951	27.8361	31.502	63.1694	47.9031	32.4478	44.0216	30.8092	42.3333	39.5597	30.8976	33.402	51.4998
	216	31.137	32.7449	26.5977	34.2584	39.4821	34.1645	30.5058	48.4755	30.5676	29.1701	32.243	66.4824	42.1614	32.297	40.1887	28.3319	37.612	32.6904	30.7937	30.4859	52.3766
	218	32.7231	34.855	30.5496	35.628	38.1076	34.1821	32.3512	49.7349	33.0679	35.1014	33.5873	62.407	45.0286	31.5027	39.8956	36.8666	45.0255	36.3091	30.7961	32.9984	49.4539
	220	29.7437	34.4467	29.5882	36.0932	38.5566	33.3262	29.79	47.332	30.7312	32.3229	30.8013	63.7923	47.3135	32.8993	38.7434	29.9379	46.9149	35.4206	30.3952	26.9253	51.7712
	222	27.4212	31.0447	28.5375	31.4817	33.3618	33.8057	31.6177	47.021	35.0327	31.6955	33.3855	66.4218	47.3271	31.0279	41.905	31.3062	42.7551	35.4656	29.7371	33.6817	46.9767
	224	32.437	31.9075	26.7936	33.7032	33.0459	30.504	29.469	46.5596	33.713	29.4603	30.0425	64.4621	45.8737	31.3756	39.6758	34.0613	42.2118	34.6303	29.6983	26.275	46.5856
	226	29.1321	32.0343	31.531	35.1001	37.7878	33.8131	31.2699	50.9907	31.1584	27.9509	35.4099	61.727	44.6007	31.2551	43.5149	41.1278	43.5647	34.4422	31.2035	31.2782	50.1277
	228	26.2771	30.6027	28.2631	34.092	30.3663	32.2323	28.724	44.656	32.389	31.5349	31.0425	65.1628	50.5886	31.5615	40.0675	28.8637	49.4331	36.9586	30.0705	34.2657	48.1694
	230	26.4464	33.9784	31.455	33.1292	34.5415	33.0531	31.7617	51.6064	28.8588	29.0496	32.7355	63.8259	46.2165	32.8769	39.6912	31.1332	45.5502	36.5024	28.0674	35.3783	49.1381
	232	23.5493	35.3192	25.4747	31.005	35.9706	30.426	28.4681	38.5758	32.4366	26.4432	29.4402	59.5935	44.7925	32.1239	39.7963	31.4107	37.5628	33.3315	28.5608	32.5092	49.706
	234	28.1201	31.0328	28.0047	29.8625	36.0867	34.0583	27.4722	45.5364	32.9351	27.2475	32.1105	62.7592	40.3851	32.0917	39.7659	26.1726	37.3948	34.0041	28.0158	34.4458	54.3959
	236	29.5751	32.5936	25.5909	30.45	32.7864	32.3853	29.5546	39.6051	28.8271	28.3012	31.7432	65.5879	44.027	31.0402	38.1027	33.4032	38.3864	35.5425	27.5094	29.4674	49.0641
	238	30.6584	31.7139	32.1071	32.3343	30.3962	30.9837	30.7609	48.7335	30.2825	30.484	29.7435	59.8488	44.8829	31.8033	36.0128	31.8466	36.3446	33.5218	28.6092	29.6758	45.6157
	240	28.7699	31.9731	28.1608	30.7719	34.5015	35.2044	31.3409	41.0516	28.6901	31.5492	32.4145	58.9498	45.8128	28.3622	41.4462	28.9068	37.7172	34.6106	28.2483	27.5228	51.3266
	242	26.311	33.3932	30.3966	30.837	36.44	36.6348	26.3247	46.2916	31.7184	31.8764	32.3574	60.7741	46.5666	29.7881	42.9459	31.765	39.0169	32.9614	28.6959	29.5719	54.4024
	244	26.0863	28.9187	26.0353	30.2802	31.3768	32.557	32.6239	44.8145	29.3394	33.9057	30.0784	58.3506	38.5564	29.2202	41.2865	27.2126	39.6691	33.4294	29.5368	29.3492	45.9039
	246	26.5564	30.245	26.4595	33.2885	32.2137	30.1805	27.4822	43.5274	31.4434	27.9245	29.8332	55.4363	43.0871	30.2017	40.865	32.7455	35.4784	31.4781	28.0312	23.1349	47.5993
	248	32.4669	31.0732	25.6806	34.4314	36.567	37.6001	29.016	42.4116	30.8386	30.7414	29.6417	59.515	43.7229	29.6051	36.217	34.0733	36.8997	34.9302	27.843	28.439	47.3206
	250	22.6041	31.2462	26.42	30.716	32.4346	32.6704	27.5782	44.7676	29.2998	30.7068	29.0867	56.0542	43.3903	31.4161	36.4706	28.9883	33.1348	31.6984	26.1325	30.1954	42.6587
	252	29.5091	32.0388	26.6339	32.2171	30.1239	31.1617	29.9584	40.295	28.2714	24.0737	30.3789	60.0701	37.1144	27.381	33.565	31.7225	40.4473	31.2262	29.6545	29.1751	45.4167
	254	29.9195	31.9693	32.7492	30.8869	34.0748	30.8992	30.4499	43.3035	30.9365	30.5734	29.8409	58.5342	43.0839	28.883	39.9859	24.5867	36.7124	33.6512	27.1675	26.6988	47.065
	256	25.9682	29.9415	25.331	30.234	34.1012	31.1156	29.4346	45.6561	32.6583	26.4124	29.6697	63.0067	38.8416	32.1399	38.0495	31.4913	34.9809	32.3023	27.9543	31.394	46.8299
	258	25.7495	32.5323	25.259	31.0323	36.0017	33.4494	31.4311	45.4634	37.0935	29.4577	29.9796	59.025	43.0419	26.068	37.1744	35.2325	34.6625	34.7258	29.0064	29.9376	46.3644
	260	28.3443	30.723	26.1437	30.5575	31.069	34.0632	22.691	45.1983	29.808	26.9776	29.647	56.8924	40.5584	31.5666	37.9672	33.9804	41.746	32.605	26.176	27.4483	40.4501
	262	28.0179	27.24	24.2246	28.6081	32.9898	31.4072	26.8036	41.8091	27.1989	29.8513	30.0737	58.3139	45.2084	29.4614	37.4826	29.8027	41.2877	32.0443	27.9785	31.963	47.0729
	264	25.0356	29.6357	26.7419	31.9631	33.5002	34.1964	30.5002	43.3745	28.9212	30.1541	31.6613	55.658	37.6956	28.5349	39.3867	32.8209	35.5297	31.2396	28.5324	29.7507	40.2491
	266	25.624	27.8723	26.424	29.9179	30.3028	30.4981	28.1467	41.476	27.4079	29.0458	29.9033	55.4251	41.1977	28.8208	38.1604	29.4714	34.5192	31.9469	26.4928	25.1203	42.4957
	268	25.419	29.1431	25.6062	30.7876	31.5051	30.6662	26.3364	41.3117	33.7281	28.4415	30.2692	54.9895	40.406	28.4574	42.4258	32.0243	35.7164	30.9131	26.1724	29.7179	49.5376
	270	29.3603	27.3345	28.3478	27.2072	28.4451	32.3588	28.2482	47.7625	29.7534	26.934	31.6717	55.3386	42.0816	26.1434	35.029	24.15	33.8792	31.6666	29.5684	28.7682	46.8072
	272	28.0547	30.9253	22.9723	28.2736	34.6092	26.9426	28.1758	40.1224	29.9566	25.9587	29.8427	59.3499	39.8996	28.3413	38.1733	28.8484	35.3467	30.0967	25.9106	25.4029	41.8237
	274	24.9437	30.8641	26.4864	28.3455	33.0152	30.2174	26.8635	40.2619	28.6955	28.5567	28.4482	56.5634	38.808	29.7158	37.495	27.3641	27.1844	31.3884	28.7879	29.1988	48.8132
	276	27.8287	29.8227	29.119	27.3531	31.7454	28.0814	26.3375	41.5295	33.1351	29.8125	31.2564	62.0416	41.6059	28.2498	39.7841	29.1877	38.2774	27.5967	25.769	31.315	50.5683
	278	26.1614	28.5623	24.4981	27.0768	30.675	30.7715	24.6235	41.1392	29.782	29.3599	29.3281	49.5931	41.653	27.0834	34.0177	28.6407	30.4536	29.0024	25.5712	24.7042	45.3028
	280	25.7699	30.7362	22.2083	30.1012	28.0456	32.1579	28.9087	42.119	26.59	27.2263	30.8237	56.9086	40.5977	27.428	34.8892	29.4959	36.0944	30.5903	25.7233	30.4379	41.2931
	282	27.6423	27.2775	23.7958	25.1538	32.8025	31.4211	28.3327	39.3712	30.5912	25.8965	28.1658	54.5293	44.7078	27.8289	34.9231	28.5105	30.2532	28.4309	25.8348	29.4265	43.6273
	284	25.8394	30.246	27.8963	28.6058	33.7511	34.1894	28.4388	35.3025	28.371	26.9853	29.7682	53.4608	42.7918	28.6462	35.8228	29.4614	39.6262	31.0185	30.1308	28.3954	45.3316
	286	22.4731	28.1874	28.0245	26.7489	27.3574	29.1993	25.2936	34.7872	28.3863	24.6588	27.4061	50.7543	40.9148	25.8985	34.3993	29.1453	33.5687	31.315	26.3833	24.4325	42.7159
	288	26.7085	28.4146	27.334	27.5782	27.2238	30.7835	26.7214	42.3936	30.7149	24.5774	27.8034	56.0868	41.2485	25.6493	35.6891	34.2231	34.96	30.368	27.3006	26.0172	47.431
	290	22.487	23.9331	23.9104	28.7376	30.1375	26.7031	24.1214	42.1811	23.9961	23.5255	26.1516	52.7999	35.5501	25.2921	35.723	31.9198	29.205	28.8646	26.9654	25.7351	40.1522
	292	22.1708	25.7559	26.3914	29.3809	32.3287	30.4159	26.2095	39.6703	27.2855	25.5105	27.8478	58.8786	39.8293	26.2526	36.0925	32.0317	35.3016	30.1334	25.9318	27.3838	44.7275
	294	24.5994	28.8601	23.4549	28.0493	29.1184	28.8274	27.6728	34.6522	26.6939	25.0436	26.4746	51.3817	38.9991	25.645	36.5329	24.0595	38.447	29.2897	25.0975	28.5979	41.7045
	296	30.1058	29.2722	27.653	30.3639	28.2828	28.3284	26.1612	38.8515	28.6708	25.329	26.6046	52.4696	41.4145	25.4349	34.1319	28.4397	38.3876	29.5735	27.8483	27.1185	39.7017
	298	25.3029	29.1733	23.3928	26.0348	29.7627	28.7187	28.2955	41.6857	27.1596	26.5575	30.1697	59.7546	37.5284	24.5267	38.2686	30.364	32.6915	29.7014	23.749	25.9859	37.0611
	300	26.1972	26.619	27.3271	28.4728	29.3308	29.0217	25.387	43.853	28.0611	25.1301	26.7694	51.1164	41.6052	25.7849	37.7654	29.935	32.7379	29.4494	26.7381	25.8708	38.7052
	302	26.1028	29.3182	23.3104	26.6258	27.7595	30.8498	25.159	38.1536	25.5624	25.0728	25.4842	50.7108	39.6753	24.408	31.9897	26.473	29.8505	26.9914	25.0269	23.926	44.4316
	304	21.5897	26.8363	24.5766	29.6266	31.2477	30.6232	25.7294	34.7022	26.3427	24.0956	27.8761	49.781	37.0458	23.1782	32.5221	25.5093	35.0954	32.2122	28.0844	27.4673	42.2076
	306	23.3382	27.278	25.664	25.1527	28.3014	29.5785	25.1468	34.3723	25.9236	28.8785	26.9114	54.0537	40.6691	24.1233	31.3514	26.6199	27.9588	28.3871	27.0032	29.735	39.3004
	308	26.8847	29.0523	24.2813	27.4603	29.1633	31.5756	29.8784	36.9529	28.9547	26.2951	27.5635	53.1918	41.6885	25.0446	32.0732	27.5342	29.674	29.0621	24.0263	25.0806	40.9256
	310	25.7981	27.3188	25.5129	23.4617	29.1242	28.9839	24.7491	36.9967	28.3146	23.6546	26.3474	51.1294	41.4018	23.8825	33.369	30.0361	32.3244	33.3439	24.6877	22.8252	42.8519
	312	24.5411	27.977	25.4319	24.0201	31.0662	32.3446	24.8957	38.7767	23.9731	25.4278	25.9093	52.5292	38.6928	26.782	31.1923	23.2702	34.5221	30.4287	26.6777	26.7218	37.6512
	314	22.4994	28.486	23.2111	24.5815	28.7104	27.8911	26.816	36.2456	26.1377	23.6655	27.6765	50.4892	37.0146	25.986	32.9564	26.8585	38.6073	27.9031	23.097	26.5333	34.2282
	316	22.9513	27.2832	24.62	24.5581	31.4472	30.9071	26.3177	38.3465	31.1747	25.2866	27.4675	52.6534	36.2101	25.9376	35.2133	29.2025	36.3885	30.3951	25.8954	27.2834	40.8956
	318	23.9949	29.9155	24.5859	28.8373	30.3357	30.4705	21.9564	38.8098	26.1408	26.8416	27.4136	50.6759	34.9719	24.0582	31.8873	29.3365	29.9282	29.8309	24.612	29.9253	37.2734
	320	23.7086	27.4524	24.9325	26.4997	28.9908	29.3357	23.3211	37.8637	26.9754	26.2874	23.1365	50.9862	35.8626	22.2359	31.0715	26.0985	32.546	27.7932	24.1823	22.3333	35.4444
	322	22.732	27.6893	24.7839	26.1595	28.4943	27.6416	25.5301	40.3897	26.2419	26.315	27.2137	49.2843	38.2139	23.6567	32.0266	26.8191	31.1199	28.7188	25.364	25.1625	43.9722
	324	26.0791	27.6386	23.9978	26.7241	28.2619	31.6161	24.3041	37.1039	30.7642	25.0504	23.8602	46.7064	38.9248	23.6486	30.2514	24.3722	33.4885	26.0679	24.6698	25.5673	34.6366
	326	22.9403	27.8644	25.8608	25.4272	30.7728	32.7542	26.9746	44.2781	27.1551	25.2343	25.7046	50.5006	32.5263	23.1441	29.809	26.3243	29.7169	24.4095	24.9204	25.144	41.1037
	328	22.7461	28.1112	23.6549	27.2127	26.57	27.099	23.8955	36.0587	25.1381	26.4229	26.4706	49.8976	37.0521	25.284	32.7781	28.2176	36.3352	30.0695	24.4237	25.5814	35.5026
	330	24.3863	27.6358	22.615	27.5098	30.4253	29.7794	25.2879	36.9137	27.6969	26.9956	28.2387	50.7495	36.9241	22.9225	33.6172	26.9123	37.9746	27.159	22.8742	24.4964	41.4639
	332	24.5088	26.9386	23.16	26.327	26.7215	29.2765	23.4913	37.2644	26.1763	26.5889	26.4289	47.149	37.2614	23.4942	32.5595	29.8193	33.8879	28.9049	23.4888	24.8409	33.5855
	334	24.7571	26.7932	22.3421	22.7516	28.9408	30.8555	22.2896	38.6676	26.6015	25.6812	25.7134	47.8568	36.327	24.3021	34.4639	32.6192	28.2002	27.3682	26.7087	23.1735	36.3496
	336	24.2204	27.7811	23.2364	26.5722	27.8095	30.4174	27.0522	36.103	26.9407	26.7378	27.4871	47.9975	34.1855	22.8948	34.9738	27.7416	30.8064	27.4908	25.8217	24.6292	35.324
	338	27.5461	27.3428	21.867	26.7967	26.9507	25.9809	22.2213	38.6081	29.207	25.459	23.661	44.979	33.7195	24.2458	29.4885	27.7463	33.1425	27.6859	22.4186	26.8583	36.5523
	340	22.6435	28.8931	26.3872	25.1977	28.9267	28.7421	24.0602	37.3814	27.5076	23.8519	26.3796	46.2282	34.8865	25.7318	27.5547	26.5831	29.4353	28.9249	25.149	23.239	37.8048
	342	22.6469	26.8092	25.8485	25.1326	28.3513	28.3438	22.9551	31.7372	26.5818	23.7721	25.3149	44.1999	35.1617	22.304	28.6966	30.2596	30.0287	25.4827	24.6113	23.6784	40.9218
	344	22.4932	28.3642	23.5752	24.9336	30.0366	28.0481	24.237	40.6919	27.8397	26.3753	26.6721	47.5553	36.0124	22.8768	34.3401	26.7591	27.8614	28.114	24.381	25.4947	32.7655
	346	23.4428	25.7834	23.62	25.2075	28.1525	27.2508	21.5017	34.1186	26.7123	29.0922	24.9406	43.5873	37.2625	21.8919	26.8779	29.5662	32.6466	23.5712	24.8542	23.4709	34.3117
	348	24.466	29.7125	23.1854	28.7466	27.4554	28.7158	26.1115	39.2146	23.4861	26.3227	25.6636	45.4582	35.5165	24.2564	28.8495	29.7175	30.6283	27.5259	25.492	22.826	33.4116
	350	21.0492	26.9404	23.1902	26.6897	24.1125	28.3378	24.2059	35.8973	29.2472	27.6314	24.6253	42.9175	37.0015	22.7453	32.6855	26.365	36.4063	26.9391	23.0344	23.4216	38.1896
	352	25.5816	25.7184	24.5549	27.0337	29.0485	29.764	25.7495	33.4707	27.5378	24.1102	28.2817	44.6797	32.7718	22.6823	32.3182	29.2396	33.0208	26.9435	22.4802	24.3211	32.8053
	354	23.8341	27.032	22.2923	26.4484	26.4146	30.8413	24.5691	36.9116	25.4898	23.9157	26.707	45.2239	34.1562	22.9548	31.1526	26.4715	30.7345	26.7989	25.0809	22.3489	33.2238
	356	23.6533	29.3123	26.3587	26.8404	28.8239	26.8735	22.7263	41.0127	26.0202	26.2472	26.195	46.5663	35.4148	22.1922	29.4305	28.8429	31.6188	27.241	24.488	23.0683	36.4949
	358	22.4732	25.1776	25.2089	24.9395	27.8666	29.4371	24.5777	35.1732	25.4565	22.5665	25.8527	46.8162	34.8412	23.3723	31.0734	27.7655	31.1253	25.9954	24.6335	25.2042	37.7961
	360	28.7401	24.789	23.3835	29.5885	28.2663	26.7302	24.4901	39.285	27.3999	27.3994	24.8305	46.9212	34.5615	24.2862	32.2709	23.2604	31.9367	26.7539	22.4489	24.6695	36.1163
	362	25.089	26.5968	22.5926	23.4418	26.6817	28.3637	25.5678	30.5914	24.9504	23.1322	26.5394	41.3597	33.8344	25.6252	30.1047	28.2409	30.0889	27.9818	24.9139	23.6584	36.7726
	364	23.9427	27.4203	20.7027	26.2094	24.4374	28.0074	23.2739	34.6214	27.7815	23.4746	24.5028	40.8568	30.8374	21.3838	30.3828	26.2323	30.2922	29.357	23.2595	23.6058	32.1003
	366	21.5202	25.9827	23.1055	25.0858	25.6249	29.1303	23.7432	35.6614	25.329	24.5104	25.1335	45.6729	34.6898	22.2216	29.9003	25.0943	28.4095	27.5937	22.6713	25.6235	33.6369
	368	24.4317	26.4003	24.9006	24.7778	28.7767	29.472	23.087	33.9525	26.8644	25.6716	23.8174	43.7308	33.7859	23.31	33.3848	28.8003	27.6988	25.0849	21.2269	22.1104	34.5156
	370	27.599	24.8141	25.5688	24.0948	28.1659	28.1144	22.4753	35.5888	26.4495	26.6374	25.431	44.909	33.1923	23.5636	28.3942	27.4605	25.3502	27.9469	23.8448	25.0023	34.3772
	372	24.2979	26.2319	24.3456	24.0114	24.7141	28.1129	23.1371	36.6012	25.6832	23.5363	24.9934	40.2477	35.8733	23.344	29.6468	27.4668	33.6522	27.027	23.401	23.9454	36.7073
	374	24.2736	25.1543	25.0772	24.9419	26.3758	27.9745	24.5723	31.686	25.3579	24.6289	22.5592	43.9369	36.6451	22.7514	31.2827	23.3919	27.8991	27.3976	25.4765	24.3333	39.7292
	376	23.6692	30.9186	24.6685	27.2282	24.3062	25.0739	24.2333	29.2621	25.6345	23.5768	23.3278	43.8575	35.0338	20.9292	29.3407	24.8334	29.1183	24.8646	23.8936	22.7186	36.836
	378	24.4148	27.8785	24.5475	25.7429	26.5161	26.8128	21.9583	33.2483	23.723	24.1434	26.314	41.6428	33.3778	22.2701	29.8969	28.6511	27.6856	26.411	23.4397	21.4238	36.4471
	380	23.056	24.9348	21.5645	27.0541	25.8661	25.7127	23.6263	31.8946	27.5257	24.2149	23.9384	41.1698	33.6543	21.6065	27.6236	27.6661	30.4159	24.7964	22.4414	25.9259	39.0664
	382	25.868	26.4966	23.6535	25.6301	27.1101	25.2079	24.468	33.524	25.3211	25.0771	26.2316	41.7667	34.5612	22.2166	31.5503	27.1911	29.0718	25.1643	23.1915	22.4643	35.4662
	384	27.1362	24.6891	24.9718	27.1883	25.2891	28.266	24.6342	34.7491	26.7775	23.3212	26.1152	43.6362	36.3319	21.6734	31.224	25.3333	30.3796	24.8528	23.0997	22.9236	36.9542
	386	25.9667	24.6949	23.7596	21.9056	24.6421	28.8423	25.7822	36.534	26.827	25.3032	27.2664	42.7183	33.4274	22.3242	27.5581	28.1695	27.7397	27.6012	23.9726	22.6924	35.331
	388	24.3821	25.4882	22.7967	28.1442	23.7829	25.207	24.0378	31.4355	25.3183	25.3312	23.9829	43.314	33.3492	20.654	28.3287	27.8754	25.6124	23.9435	21.9088	21.7826	38.0774
	390	22.4322	26.8053	22.95	22.9663	26.3348	29.2578	21.2256	34.0826	22.5804	25.0596	25.5733	41.9747	37.0675	22.2427	30.9404	26.8765	27.2859	26.7287	21.0751	25.4239	37.9379
	392	22.5606	24.1278	22.4754	24.1428	22.8967	26.378	24.455	27.3413	24.3989	21.5006	22.1761	41.9104	32.1956	21.9342	26.6788	24.6342	23.6638	24.2284	22.0231	21.8586	34.309
	394	22.7177	29.1067	21.949	24.4471	26.4576	28.1856	25.4436	34.1045	27.8175	26.3107	24.7315	38.2373	33.9345	21.9519	30.769	27.1025	31.7762	28.6805	25.3681	26.7655	37.8944
	396	25.3453	24.4278	21.7134	22.9409	23.449	27.8133	21.785	30.2548	25.144	25.036	21.8118	38.7654	32.3495	22.6618	28.6985	24.7456	26.454	26.0212	24.484	24.9192	35.493
	398	23.0473	26.3506	25.406	27.1623	23.7027	29.7463	23.0957	31.501	25.4307	23.9826	26.1429	42.3333	38.2413	23.4439	30.7004	27.9094	27.8236	27.8477	23.4185	24.7971	39.8672
	400	22.7284	24.4772	24.5225	25.7846	24.381	26.6176	24.4357	31.9134	22.519	26.5608	22.5791	42.7001	34.41	21.8266	28.4952	24.848	31.0953	24.1246	22.8302	24.5547	34.5133
	402	24.7231	25.2072	24.2913	25.5856	22.7142	26.0818	22.5668	30.6493	23.1384	23.3268	25.9411	40.0748	33.4019	22.6114	29.4866	28.1124	30.1155	23.4488	22.9811	22.3287	39.2888
	404	23.3015	28.6423	23.3664	24.2217	26.1752	28.1851	22.4772	32.9708	23.0002	23.5096	24.5759	39.6756	33.7917	21.3358	26.728	25.5519	29.188	25.1013	23.0241	20.833	34.8629
	406	24.701	27.6344	25.9948	25.1057	23.7641	27.277	22.5724	33.5953	23.1766	23.5608	23.995	40.6809	34.2401	21.0439	30.6061	31.1641	29.4827	24.3102	22.5007	20.9871	37.2971
	408	23.9486	25.2545	22.1445	25.9383	25.2322	24.0008	21.8416	31.5493	23.219	25.4329	23.907	38.2586	33.2144	21.2737	29.2492	25.2003	29.2685	26.336	24.083	21.5865	33.5903
	410	25.0892	24.8191	22.4434	24.1397	25.894	25.2992	22.3877	31.9445	22.8788	22.3528	23.9704	37.1736	33.4887	21.1896	26.4714	26.8656	29.9038	27.1163	23.6146	22.229	33.6097
	412	20.4817	24.2653	23.4125	24.4731	28.572	24.6899	23.1823	28.7308	25.3285	22.3687	24.932	39.1916	32.6322	20.5269	30.4187	24.6478	26.5724	25.4444	21.6192	20.9625	33.0174
	414	20.9867	25.0814	24.8834	22.3555	26.6656	26.8151	22.9118	33.9842	23.4893	24.8554	25.042	41.5046	32.448	21.9958	28.8791	26.2282	29.9941	25.5388	23.5866	23.0816	35.0635
	416	23.668	27.7537	22.4625	23.3688	23.4106	25.0512	23.712	30.3399	23.4134	26.1285	22.5107	39.0963	32.5108	22.674	26.6271	27.4255	28.6624	23.9928	21.9304	21.5434	36.9307
	418	21.8511	28.1051	21.5109	26.8036	25.6579	25.8518	19.5703	30.1353	20.8671	26.0139	23.5383	39.0932	28.5606	21.6	28.7024	22.8761	32.4375	24.3586	24.7561	21.952	35.6736
	420	22.7319	24.8475	21.9188	23.3713	24.8726	24.4691	23.23	27.472	23.6776	24.1101	22.8396	41.1078	27.1233	21.783	26.3021	27.6179	33.4512	23.5149	22.5908	22.342	33.0804
	422	22.9801	25.5819	22.3625	25.1792	22.7254	25.5912	24.9114	29.0095	23.0572	22.8324	23.042	39.0816	30.5629	19.8803	26.3584	24.3305	25.1553	22.3492	20.2348	21.4689	33.5356
	424	20.1863	22.7546	21.9026	22.2621	22.7682	26.0598	20.0718	28.4713	25.0406	22.6163	22.9985	37.8087	32.0149	21.615	28.1621	20.8252	30.7631	22.8442	21.0021	20.5195	28.4766
	426	22.0754	26.1828	20.7222	24.3462	23.5131	26.3207	21.3288	27.7591	23.6076	22.5686	25.2446	39.2538	32.9116	21.6946	26.8922	29.3829	29.9838	24.0657	23.4795	22.9493	34.1917
	428	23.9373	24.924	23.6261	24.9798	25.7196	29.9372	24.1272	33.6705	26.2299	25.4667	25.3021	43.7065	32.9297	21.8366	28.34	23.9659	32.7376	24.5332	25.2676	25.5748	37.9431
	430	36.4189	31.6268	28.0881	31.1478	33.2687	41.0661	29.8831	40.5864	27.5508	31.5898	30.4189	48.9919	44.1741	24.1638	37.1466	31.0269	38.4368	31.7833	27.4277	27.2938	49.131
	432	47.3747	34.833	28.3979	36.1089	32.7784	51.4159	29.428	46.716	32.4545	38.4372	32.2393	57.5663	49.1848	26.3279	39.8519	31.3855	56.2879	40.0999	31.2082	26.8757	67.4698
	434	69.614	39.5539	32.2797	36.4777	35.1591	68.9137	37.9501	55.1523	38.9478	48.6154	42.5191	68.9883	62.3107	27.173	46.5283	32.3654	71.3806	48.7284	36.0569	34.1796	94.8278
	436	91.9044	54.118	30.4521	43.7902	43.1931	82.9885	41.6639	59.3383	43.0167	53.2535	41.1638	81.208	69.911	29.6513	51.5279	35.5926	83.7946	54.9999	39.5066	32.7097	105.266
	438	108.327	53.7023	37.8023	42.5336	54.0467	92.1437	38.4734	66.0879	43.8847	57.5165	45.1228	87.6707	82.6912	31.084	60.7012	42.5203	125.773	62.3402	45.4265	38.4452	124.338
	440	123.139	61.0714	40.0789	45.8439	49.9679	106.797	51.9249	73.3178	51.6344	61.7933	50.1851	97.0199	99.9779	32.5092	73.1177	40.8269	137.054	73.3583	49.1488	38.6121	154.261
	442	131.372	64.3575	43.8759	52.4696	59.3676	111.25	58.2976	80.5905	44.5271	70.1508	52.765	121.527	105.437	37.3835	69.2454	40.8015	150.767	79.4236	50.0401	42.3858	183.047
	444	142.941	78.0547	45.5692	50.2276	60.5535	119.035	51.0727	84.3034	51.3337	92.1342	59.7929	120.321	113.776	37.5941	83.4299	47.284	166.225	90.3374	60.7888	40.2296	175.677
	446	159.231	74.3227	44.2235	56.1004	70.4218	130.609	59.9303	91.1742	54.2504	98.5193	61.6417	134.185	122.697	41.2031	85.8652	54.6816	190.279	101.39	61.9654	44.2428	217.999
	448	180.899	88.8705	49.0233	55.6029	68.0963	154.66	59.8144	113.019	56.599	89.9706	69.3392	149.851	140.478	41.0775	92.5959	52.2953	244.413	107.978	67.1778	50.2085	229.36
	450	177.848	106.086	52.203	63.0412	74.4379	153.499	67.2425	106.656	64.5672	106.721	75.7188	143.599	143.382	43.03	106.909	44.4084	245.257	124.978	65.7563	56.2008	231.311
	452	207.258	92.461	52.0006	61.8469	75.0819	174.296	67.0427	108.784	63.4922	107.324	82.9243	155.444	172.028	47.9564	109.668	44.3544	283.678	134.884	66.8327	51.0269	257.305
	454	208.722	90.4547	57.6089	68.2572	80.042	175.553	72.2497	110.605	67.184	98.8184	76.444	172.164	165.367	44.6123	106.743	48.8253	302.379	128.256	75.0595	57.0874	264.509
	456	235.381	107.688	61.431	66.7611	79.3027	181.326	69.8989	111.813	57.6779	119.515	84.6305	176.79	185.165	48.5163	117.523	45.8088	317.657	140.872	75.7988	55.4541	283.232
	458	217.559	113.644	68.9065	69.1979	80.3823	194.997	68.8024	118.544	67.2406	112.782	91.0773	182.834	207.705	51.2314	119.616	52.7594	347.158	143.58	73.2262	49.7382	323.884
	460	242.65	106.18	59.3088	73.1172	90.284	186.551	78.2779	135.356	64.5462	118.788	99.4166	219.383	228.164	54.82	137.213	60.4802	300.077	163.986	90.9048	58.4176	315.035
	462	233.679	116.896	62.8021	68.8974	93.4433	198.206	71.6534	125.921	67.4641	117.159	97.2956	207.894	211.474	52.6014	131.033	61.2838	312.859	150.985	87.2993	66.7082	331.539
	464	228.089	113.455	72.0852	83.8866	96.3859	188.803	87.6481	140.022	78.9698	114.148	107.902	227.533	224.816	59.808	131.965	59.0352	344.816	163.782	90.4281	67.9269	385.56
	466	242.234	111.324	62.7682	72.3297	89.361	181.386	80.1571	144.975	81.4449	126.114	107.388	252.164	229.676	55.7143	118.283	59.2147	357.731	172.266	86.3208	66.0858	319.932
	468	239.924	130.839	76.1656	80.5619	92.4099	193.011	86.1629	150.21	70.0717	123.061	112.349	240.212	236.364	62.3277	145.417	55.9062	343.88	170.586	97.8419	72.769	378.171
	470	275.653	121.271	74.7627	74.922	95.8824	184.06	91.14	150.41	69.313	124.594	109.191	244.744	238.063	64.9729	133.897	57.589	401.315	173.911	88.2942	79.065	412.244
	472	229.788	120.979	75.7037	81.3739	98.1333	196.339	87.386	155.912	75.0679	137.296	118.451	269.251	262.13	70.2504	134.642	62.4151	415.19	198.463	91.2581	73.2542	425.909
	474	262.639	122.12	71.1742	93.6218	102.718	190.233	80.6551	150.427	76.9892	115.867	116.941	286.755	257.336	71.3358	151.558	62.5359	368.968	187.904	88.9472	71.1407	390.332
	476	225.828	119.633	76.6364	82.2483	111.108	206.125	99.2298	159.264	82.0309	148.485	116.096	323.801	263.994	75.8005	149.332	55.2957	409.949	201.409	92.0055	76.951	372.348
	478	246.297	129.636	86.4357	82.3477	99.9908	204.422	94.1052	175.37	79.4675	142.801	124.372	315.476	264.254	76.6002	155.409	69.4672	448.229	198.619	92.4919	77.6505	402.093
	480	248.365	152.144	82.0554	81.949	116.357	224.128	104.45	170.784	80.9758	142.48	134.719	343.046	280.336	78.4667	177.856	73.248	383.601	209.368	100.626	85.9081	395.167
	482	256.142	119.127	80.5536	97.4812	107.021	200.253	97.2536	206.291	74.553	136.017	132.081	335.257	290.053	80.5813	160.853	67.3288	384.188	228.921	109.245	85.1399	347.106
	484	239.877	139.168	95.5928	94.52	96.8803	195.806	93.9307	180.6	86.2916	128.381	138.766	356.665	258.143	79.6025	186.155	65.6943	395.77	222.495	101.938	81.387	391.569
	486	256.164	133.461	87.1062	78.5265	121.624	215.192	98.4259	165.311	87.2013	130.175	132.285	368.804	284.588	81.7936	160.879	76.726	335.449	245.32	102.484	94.5553	343.114
	488	232.172	146.131	90.6252	86.7164	108.105	212.452	102.873	176.498	85.128	145.302	151.387	404.726	262.567	80.2906	181.267	58.3156	359.476	232.552	96.3922	89.3807	373.334
	490	257.913	139.736	83.2472	82.1384	110.741	203.216	117.097	199.417	80.8412	144.224	150.877	409.856	282.45	87.082	159.634	64.5362	352.853	240.501	99.8368	76.7876	400.312
	492	222.664	149.576	89.6954	96.5829	114.017	191.271	101.549	172.054	89.1514	122.555	151.578	424.98	285.779	95.784	172.853	87.6282	322.582	233.574	100.77	92.5786	381.745
	494	244.796	155.233	92.758	90.5358	103.39	213.12	117.296	188.762	87.3904	133.256	153.484	425.58	247.795	91.9134	179.317	61.3921	321.555	260.629	97.7948	86.7514	371.254
	496	256.929	148.562	93.897	91.5484	114.496	218.572	110.367	178.439	79.3899	131.226	151.266	439.093	291.846	98.7634	185.447	73.3613	335.501	272.061	102.244	96.58	360.467
	498	225.771	136.543	89.7571	85.1006	117.027	205.645	125.435	190.506	94.9907	129.668	166.89	519.342	300.403	95.5294	186.811	62.9286	370.227	298.762	105.147	95.0092	342.762
	500	217.723	130.93	79.8806	92.3782	119.856	198.733	121.121	188.853	91.0105	135.057	162.473	489.271	273.58	99.8825	185.513	78.1531	436.54	259.953	109.167	86.9266	380.897
	502	231.085	139.858	93.5109	92.5918	120.92	213.873	115.811	214.295	98.6394	131.973	166.183	460.075	290.871	98.5033	177.912	69.4187	371.999	276.453	96.7893	97.295	375.312
	504	222.078	133.689	103.603	92.2511	112.637	190.503	110.082	201.002	89.3375	126.998	176.111	511.769	269.706	95.7134	185.59	78.9746	330.623	265.756	107.081	92.9849	332.986
	506	271.476	149.979	102.866	99.257	138.325	225.2	143.309	197.561	99.0392	138.958	195.844	531.481	323.089	112.615	195.14	77.4277	365.088	255.394	107.117	92.6669	358.334
	508	228.993	124.645	102.271	97.1764	120.047	201.388	127.234	186.892	81.7175	120.509	174.916	524.115	258.445	103.204	197.804	62.9086	388.058	268.513	113.278	87.8363	345.014
	510	241.932	126.939	112.309	94.6569	124.245	192.968	131.339	192.446	92.6018	141.704	188.672	602.712	276.191	101.986	178.706	76.7338	398.199	266.026	111.583	109.164	341.073
	512	216.096	125.242	117.907	93	111.942	189.05	128.48	209.617	91.3679	125.619	191.931	498.6	237.791	104.553	186.202	71.3319	355.048	298.599	110.68	94.1588	325.01
	514	240.617	129.914	98.2728	89.8956	113.67	187.747	134.748	198.196	99.3467	113.736	213.482	541.638	268.19	113.4	191.242	67.2687	332.093	266.079	112.009	83.7528	330.825
	516	190.963	127.874	98.8987	93.5814	110.089	196.292	133.653	205.048	93.197	134.734	214.028	532.509	250.891	106.424	203.313	65.1502	373.772	266.552	111.89	88.9057	349.882
	518	260.336	142.378	98.2835	94.7485	120.274	219.093	138.16	231.512	108.804	135.021	219.524	579.91	274.409	117.731	205.073	77.9093	367.258	302.767	116.21	109.108	336.795
	520	234.153	134.584	120.086	97.5144	126.68	200.052	125.322	221.169	88.17	121.012	215.53	574.902	268.43	118.568	199.705	68.2288	337.682	279.128	115.995	101.575	322.612
	522	251.817	132.511	104.404	95.4855	121.023	217.132	126.704	235.779	98.5083	120.697	238.212	608.611	277.864	122.825	203.61	83.9625	316.053	300.896	118.908	115.395	320.321
	524	225.389	125.427	117.362	86.6607	129.804	197.468	128.345	209.94	78.5093	126.431	245.387	613.433	272.984	122.601	197.589	76.8689	424.374	255.749	113.397	89.3943	332.344
	526	218.503	125.122	110.184	97.1778	124.166	187.078	129.268	225.2	90.7206	126.78	251.477	619.36	253.976	125.345	166.511	71.2204	302.474	281.799	116.013	101.641	315.716
	528	228.232	136.016	98.3734	88.1418	119.828	185.752	127.527	231.681	81.3612	109.711	232.418	598.985	260.072	126.166	187.063	71.386	336.122	270.474	119.53	100.009	307.974
	530	254.018	124.963	105.862	94.0829	134.644	185.758	134.924	238.056	80.7471	116.655	279.564	630.74	251.911	136.067	194.273	85.4833	408.663	297.017	124.028	107.499	320.97
	532	217.999	146.336	105.596	104.935	135.376	207.467	127.411	249.829	83.6044	113.422	274.984	561.313	258.557	134.548	198.499	78.4358	290.758	307.616	120.088	95.7857	364.204
	534	202.951	135.635	112.368	105.482	131.645	174.955	151.324	248.648	96.8302	127.159	278.09	649.191	245.184	134.026	194.53	87.992	313.201	294.292	130.49	109.751	348.277
	536	213.26	143.422	112.945	102.673	129.57	188.823	140.565	253.571	85.5768	114.994	285.712	631.924	235.72	128.114	214.23	80.603	331.762	289.98	115.888	108.77	307.722
	538	228.794	131.78	114.166	102.264	136.684	176.086	139.077	249.9	88.1254	131.051	305.732	707.614	247.863	134.113	192.79	78.3809	317.931	282.825	116.604	101.573	332.983
	540	229.404	128	113.315	90.7767	133.282	198.753	129.979	283.75	97.0394	116.562	300.91	709.316	235.659	127.575	195.959	67.1737	321.189	287.641	133.198	118.201	320.093
	542	214.713	123.805	109.979	90.3937	136.914	189.224	135.689	270.128	85.5776	130.405	285.589	708.564	220.098	142.471	205.556	86.3788	264.811	299.21	124.247	119.266	329.526
	544	199.025	135.765	100.434	97.7356	120.381	179.402	144.277	283.223	86.6617	121.746	301.346	684.553	210.719	132.609	192.638	83.4798	298.205	287.667	125.013	120.805	332.166
	546	204.163	138.371	100.74	101.532	127.54	173.473	130.932	281.966	86.3526	120.567	322.905	648.839	239.144	136.81	205.615	94.6839	301.911	311.749	122.939	116.077	289.376
	548	196.726	131.122	114.519	98.1487	123.312	183.333	129.852	328.997	85.7411	134.607	292.555	634.582	233.31	143.648	177.981	76.453	270.795	291.464	134.369	105.064	352.957
	550	216.06	136.465	110.518	111.01	132.352	183.96	146.826	316.665	100.254	119.281	317.094	641.948	223.532	153.764	185.307	72.9034	356.86	287.456	127.206	111.949	313.317
	552	191.901	125.389	102.747	100.994	133.682	181.563	132.33	307.167	105.223	109.209	305.233	646.418	213.872	153.064	193.356	64.1861	288.29	271.971	127.162	104.741	326.104
	554	212.985	139.497	117.665	100.964	139.058	180.573	148.215	364.168	99.3699	116.667	331.46	736.455	217.396	145.473	193.833	80.0802	315.652	328.32	124.377	132.561	359.355
	556	193.707	138.925	102.342	103.865	127.193	171.662	151.533	379.061	98.4437	108.751	299.901	669.521	199.097	146.883	201.679	72.1081	335.937	277.869	128.298	111.537	298.942
	558	194.955	133.571	104.848	93.2196	116.844	192.04	147.764	322.94	98.1897	104.123	297.8	682.1	207.185	144.946	207.115	72.8171	309.99	302.428	129.825	109.243	312.045
	560	184.214	132.308	98.6183	89.8327	128.45	171.531	141.545	402.188	98.626	113.527	323.882	788.35	210.492	144.359	190.968	74.7976	277.337	279.984	121.291	108.017	322.356
	562	223.228	135.927	94.6315	100.6	143.112	180.293	134.842	369.61	90.302	111.392	342.94	730.896	243.538	152.546	206.36	75.063	333.685	296.67	135.562	113.758	277.075
	564	206.763	123.147	103.78	103.721	115.444	169.422	166.584	411.938	92.5804	117.654	348.293	735.102	210.883	148.569	221.769	72.1461	266.095	268.101	130.732	121.2	296.848
	566	196.026	128.944	102.133	100.947	141.09	188.437	141.537	386.497	92.4999	109.117	335.112	743.069	218.844	155.475	168.983	63.829	327.749	274.319	118.392	121.926	302.329
	568	190.946	124.412	97.2244	98.4942	124.208	176.603	142.093	415.44	84.8397	117.264	326.603	715.539	197.216	148.974	191.748	76.6609	252.858	274.606	128.61	99.3175	278.99
	570	210.656	133.643	98.0854	101.043	124.618	168.39	151.873	408.798	95.3094	114.974	322.937	726.887	192.429	156.396	206.026	84.2216	301.511	285.988	131.92	124.05	297.844
	572	185.354	122.134	99.3325	103.873	122.974	177.755	137.159	385.901	82.3643	100.587	318.487	685.547	198.851	156.559	192.089	67.0357	265.784	276.708	132.385	114.856	303.245
	574	223.247	120.226	98.7545	99.4873	120.08	178.242	131.675	393.166	83.102	111.411	320.192	701.72	190.152	156.8	195.693	72.1823	270.212	269.066	122.551	102.246	302.386
	576	172.628	114.719	104.834	108.769	130.847	173.135	135.222	411.755	84.6737	115.448	310.677	703.91	201.076	155.79	187.864	60.6876	279.025	289.784	129.61	115.697	283.111
	578	174.342	125.012	105.558	105.902	130.777	165.476	138.739	483.04	99.8912	120.755	318.282	770.481	215.493	159.423	179.587	61.7539	263.803	292.424	124.201	120.529	274.716
	580	182.246	120.419	105.949	101.044	134.417	177.949	145.784	372.2	85.6032	106.351	358.172	690.392	193.145	164.486	197.78	73.5249	272.599	291.333	107.355	111.573	288.399
	582	172.74	133.351	106.588	93.2807	132.229	162.695	146.646	419.546	82.0235	107.26	337.83	775.605	189.423	169.127	181.479	68.0017	331.245	295.075	127.633	122.507	284.367
	584	212.597	133.776	93.1044	90.3845	128.195	158.076	123.486	428.093	101.655	101.153	348.753	745.972	170.876	166.081	177.012	64.8419	253.962	271.032	132.252	113.343	273.136
	586	174.921	129.636	88.4432	88.8245	117.501	170.754	140.448	406.516	90.0936	105.989	313.31	689.979	167.221	162.983	176.873	66.4375	233.871	261.337	115.349	108.39	272.098
	588	183.549	125.714	94.3451	108.538	137.947	157.948	146.582	434.01	92.9347	111.432	306.738	682.782	166.784	165.854	196.924	66.2022	284.738	293.131	129.869	104.883	291.089
	590	162.725	141.375	102.371	101.204	126.193	162.478	135.989	436.463	89.8711	101.372	298.79	760.34	181.029	154.475	190.043	67.8972	249.638	302.386	118.075	115.772	296.086
	592	174.9	111.866	97.0817	103.094	136.615	154.617	136.2	430.699	93.1453	101.072	295.904	713.953	164.473	158.318	163.415	61.3988	235.528	286.423	124.852	99.1965	340.985
	594	162.104	110.844	90.6585	92.2617	134.497	181.515	127.858	382.38	91.9112	121.859	295.621	708.664	162.332	158.244	180.833	71.6458	245.787	267.338	112.417	101.953	309.712
	596	188.824	118.314	90.4993	92.1713	135.858	171.638	135.159	423.889	80.5814	109.743	300.85	727.729	164.979	158.634	183.075	58.7375	240.718	267.78	121.827	102.534	314.204
	598	169.341	127.018	90.1753	104.196	119.555	181.416	142.309	400.424	86.9899	90.5263	276.057	651.796	170.355	144.31	173.556	56.0372	236.758	272.437	115.421	106.592	291.615
	600	178.74	124.828	85.3064	106.188	127.265	174.879	124.804	407.544	87.2873	98.601	278.907	640.255	155.63	149.147	169.035	65.8525	228.178	264.63	106.145	97.3718	245.801
	602	188.393	121.732	88.7191	88.8483	133.431	180.961	118.863	389.778	73.9221	98.216	297.531	667.994	155.541	153.362	193.474	57.993	231.941	245.686	111.629	100.017	257.947
	604	184.177	119.973	98.1348	109.405	145.025	161.363	134.706	407.401	85.5136	116.201	306.048	662.36	168.641	160.354	181.042	66.0787	227.722	285.868	116.344	115.981	274.712
	606	152.956	127.676	94.3014	104.829	127.554	157.482	124.266	404.832	79.1611	98.0477	276.519	708.292	148.891	154.745	169.211	66.1108	204.862	248.993	106.726	100.503	287.004
	608	183.229	135.623	107.725	95.0024	133.534	145.679	135.669	392.342	77.2682	106.119	294.752	685.061	165.223	163.991	175.902	60.9067	250.846	262.094	120.387	110.204	249.071
	610	175.026	129.094	100.099	101.312	134.541	159.676	138.95	386.852	90.8511	106.843	291.923	646.913	140.988	156.111	187.801	62.1254	255.251	258.236	101.92	111.535	288.927
	612	186.873	114.11	98.5122	97.7233	120.709	151.517	130.149	364.653	89.2849	102.157	251.264	710.209	157.938	146.824	158.314	59.7492	222.635	242.679	108.791	96.3804	277.226
	614	175.426	147.02	101.161	110.038	135.081	159.751	133.808	382.445	102.712	106.99	271.101	670.892	165.851	152.85	186.148	65.8403	238.923	279.614	105.148	103.234	291.067
	616	179.245	110.89	92.1986	88.4956	123.97	168.651	127.946	370.324	94.1275	102.44	260.272	625.608	144.475	143.06	160.413	61.2349	252.535	259.684	111.44	95.8695	247.444
	618	183.481	124.024	92.9489	100.015	130.763	164.026	128.783	367.254	85.9586	96.5944	257.938	650.603	151.546	163.407	193.301	59.5403	234.176	282.475	100.532	93.8963	251.61
	620	197.261	104.604	104.511	93.7036	137.406	168.927	135.917	349.123	94.8757	113.698	268.261	657.298	146.041	153.098	173.536	65.7932	231.183	255.025	103.451	112.631	246.075
	622	190.655	118.523	106.55	89.504	116.892	156.811	147.774	354.267	88.8598	99.5382	280.122	633.769	160.975	159.243	175.301	54.8363	207.412	266.98	109.511	103.051	230.746
	624	169.74	117.965	88.9543	91.4706	136.247	164.811	124.344	362.605	81.3455	95.0817	234.92	618.923	127.01	145.054	161.98	54.8597	254.577	254.698	98.1382	86.1772	260.135
	626	176.074	124.359	95.6289	101.511	123.685	162.777	120.698	310.885	89.8583	102.259	242.666	674.024	150.722	156.738	171.899	61.0401	232.265	243.662	111.972	102.795	246.577
	628	167.879	116.86	90.8576	93.3267	112.651	148.329	125.259	318.04	81.6042	100.572	209.601	625.673	136.927	149.326	149.306	52.2598	213.327	236.905	95.3597	88.1085	267.05
	630	173.063	118.165	91.9126	103.923	125.384	154.712	131.166	354.96	84.4831	102.685	245.37	619.1	155.472	162.389	171.648	67.5881	193.989	236.212	102.324	115.348	249.93
	632	167.588	116.184	96.4373	96.2802	120.022	151.599	117.464	332.148	77.5809	90.2174	211.03	597.202	131.023	155.408	154.882	63.5955	189.194	244.852	96.1779	116.693	226.565
	634	180.021	119.936	103.418	97.3886	127.343	159.184	131.215	334.5	91.2268	98.0203	225.733	602.58	140.113	153.764	165.777	59.8267	235.258	229.094	103.518	105.578	244.714
	636	171.329	125.912	90.1789	92.066	124.759	145.869	122.502	314.903	75.9359	89.0608	218.046	582.092	137.331	142.985	157.262	60.9394	207.217	240.242	98.4443	96.1234	219.123
	638	175.635	121.065	86.2718	100.069	136.647	153.732	141.436	323.51	93.9573	101.277	214.094	562.166	140.997	144.291	164.488	61.4192	202.159	249.945	106.769	103.987	240.66
	640	171.828	116.087	86.5308	100.078	128.749	132.843	131.083	341.352	79.2257	90.9895	205.764	609.363	137.724	148.567	145.109	62.6114	234.504	242.514	102.997	93.9412	241.004
	642	171.683	115.34	105.864	104.946	127.17	149.375	135.176	321.073	79.7905	97.51	202.949	678.306	139.362	159.345	155.265	62.5955	222.885	273.615	101.225	102.777	215.601
	644	159.023	106.909	101.149	100.437	115.15	154.643	121.931	294.29	89.1902	97.1561	181.889	522.077	125.586	151.967	137.459	69.167	210.946	224.806	86.6337	78.2314	216.868
	646	169.005	123.583	82.2681	95.0789	122.286	150.376	134.214	282.571	93.6898	99.4744	222.544	506.753	125.252	162.053	147.571	61.6573	215.61	221.061	99.2239	82.3001	244.452
	648	178.199	116.95	89.0867	100.659	113.426	151.96	116.306	288.827	84.2537	86.4234	185.826	642.005	128.597	157.72	155.342	62.7049	193.34	224.924	101.144	78.9869	247.979
	650	190.444	111.916	87.5529	95.3097	119.984	150.932	131.248	312.28	105.229	88.0785	200.741	561.64	138.978	143.453	178.988	62.8743	198.37	232.578	93.5773	91.568	270.738

## Sheet: Panel D
IP3R1 shRNA	Time (s)	24.8118	24.7949	31.0439	31.3535	29.8977	21.325	22.6811	24.9829	23.3557	29.1129	25.6316	22.2757	24.6554	21.1953	20.4475	24.908	19.7726	23.7304	26.0678	22.7078	21.3903	23.6905	24.5646	20.8304	17.4855	22.7475	25.6596	24.5405	22.4193
	0	23.739	24.5204	29.7487	31.2581	27.8761	19.8013	23.531	27.2865	23.5575	31.3019	23.4619	22.9582	22.6501	18.2063	20.0982	25.3644	21.9693	21.411	24.708	23.4372	21.6145	20.4382	21.5178	20.4242	17.2147	21.9573	24.7414	25.0797	23.8393
	2	25.3555	22.8943	30.1591	30.4762	27.9999	20.3579	22.383	23.6103	24.016	30.3721	25.2214	24.8818	20.3796	20.126	20.8687	25.518	21.2598	22.1821	26.6771	24.1606	21.1503	22.5653	22.7952	20.1974	17.8093	22.7697	24.6959	24.3421	22.9554
	4	24.108	24.9749	28.7891	31.2057	29.0341	20.1208	22.4342	26.4918	21.8686	31.3107	25.3928	30.9914	22.2979	18.8114	20.451	26.243	22.4559	22.0362	27.2479	21.6321	21.1609	21.1728	22.5041	22.0622	19.5052	24.3445	23.8283	27.6446	23.6885
	6	24.3667	24.9825	29.4835	30.9279	29.3202	20.0898	24.2195	25.5328	24.4088	31.6739	24.6841	26.3434	21.5287	18.1612	19.1729	26.492	21.6078	23.3108	28.2174	22.0998	22.7748	19.4898	22.4251	20.106	20.2473	22.3629	23.4987	24.4388	23.6259
	8	22.8663	24.5079	31.5819	27.779	28.0744	21.2266	21.8873	24.2959	23.4202	30.6858	24.1768	26.4876	21.7376	18.6822	23.4496	23.898	21.1579	22.5153	27.0453	23.95	21.7155	19.5567	22.0215	20.7072	19.8434	23.5107	21.7442	22.6738	22.969
	10	23.8893	22.8387	30.6582	28.1221	28.3413	22.0356	22.3982	24.8878	22.0075	31.6605	24.3203	27.4651	22.3096	17.0864	21.0499	23.3695	20.3907	21.721	27.0291	25.2653	21.3129	24.0846	24.2763	23.7683	18.6908	24.0935	26.3397	22.4922	23.8484
	12	22.4343	24.0703	30.6421	30.038	27.0374	18.45	22.2067	24.889	22.2082	27.8439	23.0881	27.7167	18.834	19.7886	19.3444	21.4193	22	24.2785	26.4817	23.2048	22.106	20.5276	20.1507	19.3067	17.7809	23.6173	25.603	24.4119	21.9466
	14	22.8052	26.182	31.811	31.0548	27.6912	20.2182	23.3459	24.2408	22.8076	31.0018	24.2995	25.1118	23.1568	20.7158	21.2685	26.1733	20.9424	23.1456	24.5676	25.3878	22.3421	23.6846	22.496	19.5181	19.1549	22.0594	25.8646	24.8625	25.1953
	16	34.2726	26.767	29.585	28.8027	32.0262	26.6402	27.3001	44.605	28.6346	28.6983	29.5912	30.721	23.7397	20.5325	23.6059	27.0783	21.4885	22.8925	26.9741	26.1672	19.4964	21.6116	23.3558	23.1254	24.445	25.2178	27.2629	26.3847	23.2322
	18	31.1653	22.6682	29.3196	26.9608	31.3468	23.9151	27.2843	38.9973	31.5729	24.5768	27.1885	25.3858	24.6572	20.8806	21.5276	24.5626	21.6376	23.6096	26.1216	20.5784	22.9991	23.9961	21.5023	21.8899	21.4196	25.2235	24.9955	27.8363	23.0125
	20	31.1915	26.3339	31.2333	25.3855	31.1351	25.5458	28.8242	41.7519	30.1336	27.1654	26.5849	24.378	21.6542	19.0871	21.9937	25.8349	22.2201	23.7352	25.8868	24.4133	21.979	22.4032	20.9899	21.1992	22.1929	23.6664	24.1253	24.3637	22.5141
	22	33.0476	27.0032	26.9085	25.3077	29.8814	27.6484	28.2775	35.8666	27.3077	26.0133	26.7468	26.86	22.2557	20.1053	20.8701	25.9027	21.1862	21.677	24.6597	23.5265	18.8214	21.7658	20.1232	19.4818	21.6734	22.6816	25.3603	25.1563	23.751
	24	31.8589	26.9555	28.746	27.2416	29.9359	24.4837	28.6818	39.7399	28.9854	25.1696	25.9473	27.9239	24.3352	23.4166	20.9792	25.8162	20.2474	22.9321	26.9297	23.3687	22.9124	22.6345	22.5294	20.3534	24.161	22.4344	25.4275	27.1666	24.4532
	26	29.4785	22.4358	27.9401	27.2357	28.152	22.6431	26.718	33.7813	28.6767	24.9957	25.7216	25.3013	23.3997	21.5659	21.0111	25.7506	19.2888	23.4044	25.9561	21.9755	22.6549	22.0593	22.1408	20.3606	20.5496	23.7331	23.6687	26.5044	22.8404
	28	32.3959	26.9898	30.4083	26.1208	30.5478	26.8505	28.7626	35.4867	28.2575	24.5329	26.1718	23.9514	24.4796	19.7125	21.676	24.4831	22.2479	21.8897	23.6247	20.4459	20.8292	19.8542	21.5989	21.3226	21.5761	23.9937	24.2256	25.3987	24.1206
	30	29.7431	25.4247	27.9899	25.1246	30.8537	24.9727	26.8805	38.3187	27.1968	26.272	27.4722	26.6391	22.3344	20.5677	21.2276	25.8876	22.282	20.656	23.7671	22.5743	22.6735	22.2074	20.788	17.9727	21.7891	25.0733	24.5438	25.7472	21.6597
	32	30.77	24.0006	30.4261	25.9128	29.8553	23.0568	26.2046	36.2181	28.1396	25.0947	25.9492	29.7737	25.6981	18.7676	22.2766	23.9423	20.035	24.2091	24.1774	22.651	22.3103	21.4584	21.6413	20.2388	22.3398	22.7015	22.5899	21.199	24.2458
	34	30.1581	25.3333	30.5464	26.1162	30.421	22.2514	27.6895	32.2717	27.102	24.7214	25.9755	26.3862	23.0198	20.7946	20.887	24.6764	19.853	20.8777	23.2215	25.8324	22.2331	22.5043	25.6101	20.831	23.1698	23.2792	24.0776	21.756	22.0706
	36	32.3456	26.3483	28.1237	27.8534	27.0926	22.632	27.6228	34.9989	26.565	26.921	26.1403	28.4684	22.5541	19.6066	21.6406	24.0338	22.0293	21.531	25.326	19.3197	21.6822	21.1326	22.0176	20.4274	23.9352	23.6575	24.909	28.7836	21.6357
	38	30.6101	23.3769	28.5532	26.7728	28.867	24.6809	27.2257	35.1513	30.887	25.4835	26.0998	30.1914	26.8432	19.7213	22.9251	24.2163	21.1893	21.5891	24.7007	24.9767	22.3374	21.3046	23.8458	21.2873	23.6816	22.9674	25.1243	23.4306	21.8802
	40	31.4298	25.8065	29.9746	26.595	30.4669	22.575	30.5495	33.1245	27.9628	26.4999	29.2932	24.609	21.6229	18.9371	21.7114	24.925	21.5367	23.4988	24.3705	22.0876	20.5093	21.7672	22.9002	20.3493	24.3523	22.7839	24.1922	26.3808	22.5733
	42	31.7894	24.0001	28.9508	27.7408	29.5666	26.0277	26.6978	35.5073	30.793	24.6147	23.9252	27.8206	22.4514	21.0143	22.0752	26.4967	20.9985	23.8097	23.0319	20.4992	21.9281	21.4202	20.0008	19.5962	24.7261	22.905	24.1516	29.5818	21.6453
	44	33.9312	26.6713	29.1229	26.0449	30.4201	28.6291	27.8352	40.0539	29.0985	27.7617	27.4865	26.4349	21.7744	18.3913	20.5002	24.5903	21.648	22.1252	23.0635	24.0365	22.3379	21.3078	22.1429	19.4038	21.1116	23.4484	24.5818	22.3751	21.8901
	46	29.3891	25.8892	26.7123	24.0338	30.5204	21.6493	27.7588	34.2199	27.3035	22.6391	24.8844	28.2482	25.822	21.629	21.0187	26.1195	21.7733	21.0439	23.8302	24.5657	21.9678	20.0956	21.9839	21.3754	21.2908	23.5189	22.9203	25.5979	20.4342
	48	33.5714	25.0679	29.401	28.0025	30.7844	27.3193	28.9434	39.5747	32.0159	27.6134	29.0214	24.9368	24.4467	19.9894	20.8686	23.0945	23.5257	22.8843	22.6838	24.6439	21.0726	20.1403	21.8846	19.9211	21.3304	22.8737	24.4621	26.5064	22.2284
	50	32.9134	26.0383	29.5622	27.9474	33.8602	29.1796	27.8303	34.8081	32.7442	26.1314	24.8246	30.5509	24.1222	21.7312	22.7604	25.7	20.8006	21.8293	23.5605	25.995	22.3419	24.1848	23.9314	21.8645	22.0624	24.134	24.7426	26.9193	21.83
	52	34.5867	28.0975	30.7158	31.1483	29.5676	27.2653	26.5251	41.3992	28.2127	28.2924	28.2615	29.1503	23.163	20.0254	23.0881	25.4789	21.531	22.5886	23.1445	28.0243	21.5598	23.57	21.5068	21.463	22.8967	22.4595	24.4773	26.1515	22.1777
	54	32.8146	26.7134	30.8491	29.1763	30.9059	27.2862	26.4776	34.1066	28.4707	29.3625	24.6602	29.6876	24.6278	21.6727	22.4999	29.5494	24.3823	25.2281	24.1068	29.6573	26.2074	19.6953	23.0694	22.1581	23.3215	24.102	24.1124	30.6304	23.3322
	56	32.6209	25.6531	30.0863	28.4749	31.8921	28.3673	28.9021	32.1171	27.5035	25.8463	28.1011	32.997	29.0579	24.3056	23.6483	26.6987	22.3009	25.2857	25.8863	33.4523	25.47	22.5617	27.3561	23.5466	24.6993	24.6197	27.8648	34.6677	22.7434
	58	33.9126	28.4205	32.4229	28.6026	32.4188	31.1307	32.1481	33.7511	30.7285	28.5656	28.6676	41.0833	30.0164	24.3223	24.8329	28.2945	23.5134	29.0289	24.7586	31.3393	25.9605	22.9681	22.3035	23.0444	25.5353	25.0334	27.4316	33.0721	24.6829
	60	37.1398	28.3828	34.2098	29.3845	29.4904	28.2655	28.2988	35.2758	32.5095	26.464	28.9972	43.9324	31.0502	22.7348	25.7054	29.3359	22.9242	29.4849	26.4275	32.963	27.4205	28.7162	27.2853	23.6197	25.9142	26.159	27.0344	38.2214	27.9791
	62	34.4746	24.6779	31.6775	30.9281	31.7214	30.7461	33.1252	37.5871	29.6031	27.3632	27.8286	41.7897	35.2771	25.6368	27.3366	29.264	25.7596	28.4506	27.1276	43.1366	29.259	24.8052	27.662	24.1533	30.0769	25.7599	29.8249	32.8321	26.4636
	64	40.5747	30.9798	32.5994	32.8357	34.3275	31.5366	32.5063	43.1263	32.6794	28.7166	28.7232	44.8563	34.1267	23.9024	28.0635	31.0693	25.354	30.4379	29.051	40.4154	30.1125	27.3976	27.1082	24.4838	26.787	27.9982	28.2401	37.3995	26.8896
	66	37.7743	31.6804	35.7448	31.4475	36.4211	28.2237	33.3788	35.5604	29.2186	34.0689	30.0013	45.8269	35.0313	26.2393	28.744	31.9312	26.3499	34.5738	27.5786	42.0929	27.758	24.2845	26.647	26.7286	28.2388	27.8398	30.7173	40.7916	27.5779
	68	36.9491	29.6187	36.4684	30.7107	38.1629	31.1552	37.6817	38.9217	32.7292	29.2366	29.6833	49.8159	35.1866	24.9615	26.5313	33.3137	27.9471	36.1405	29.152	40.2207	32.2305	26.8894	28.4471	27.9399	28.9984	28.9616	29.9264	42.4032	26.7465
	70	42.1497	31.1356	38.0459	33.8435	40.9723	29.007	35.3524	44.2664	34.9424	30.6596	33.5512	50.2859	35.2128	24.491	27.1075	32.6413	28.4526	37.5183	29.3831	44.4361	32.7731	31.9494	28.5324	29.2943	26.8629	29.8795	34.1206	39.6236	28.2285
	72	40.6806	32.6565	37.9129	36.5748	39.8505	33.1256	37.8183	40.5325	32.8009	33.4763	31.4756	45.6619	34.7414	29.1309	29.3085	35.7376	26.4716	33.8988	31.0343	43.3581	35.1079	30.8388	32.4987	30.8335	29.959	31.5402	35.0012	46.1626	30.4993
	74	43.4692	34.3391	40.2338	39.7269	39.4445	35.7161	46.8377	42.8321	35.1045	33.8643	36.2518	54.9457	35.9613	28.7746	29.2007	36.6528	28.024	37.5992	30.0082	48.6332	33.6011	29.5204	33.3727	30.6888	28.7787	29.1559	32.8844	43.7647	29.5947
	76	45.3439	34.8524	40.0006	36.9318	40.3589	38.6758	46.1988	48.8304	41.8634	31.9935	36.281	59.2662	39.3723	28.5286	30.1704	34.3517	31.1768	32.1703	32.7474	50.7905	35.2699	26.8544	36.4423	29.2918	34.4885	33.1014	33.4308	47.2507	29.5161
	78	46.2167	34.995	41.4469	35.2396	44.2278	36.2627	45.8603	49.1391	38.3057	38.7834	37.6059	61.0393	38.655	27.7266	27.6805	33.3991	29.4443	41.5795	32.5954	50.5898	38.8546	31.9774	33.6007	30.9761	31.6216	34.4642	32.4251	48.634	29.1038
	80	43.7041	36.9466	40.7092	40.4473	38.5395	40.3857	52.4812	46.7429	39.5446	35.3987	37.9375	62.5927	45.3486	29.72	32.5948	38.2878	33.3742	38.1974	34.3964	50.7729	37.587	28.2109	39.9316	31.7206	29.3868	35.2867	34.2404	50.8873	29.6782
	82	52.1442	37.9383	44.6168	39.3174	44.2631	36.2621	57.921	53.8219	42.0021	34.9614	37.4617	60.9523	41.0923	26.691	31.6889	34.4153	33.6301	36.7171	33.1695	58.0952	38.277	32.651	34.8084	34.0304	31.8615	33.121	36.1293	49.0668	32.2312
	84	51.3404	39.2922	43.3571	37.945	43.8747	39.5355	54.6998	60.6971	39.8278	38.8895	40.3577	63.5135	41.3393	33.7857	31.5694	35.4122	29.2345	36.3781	36.235	65.781	40.3101	33.5877	37.1983	30.44	34.9353	37.4442	36.1649	57.8438	33.1922
	86	53.5747	37.8416	48.4371	40.2962	50.4875	44.8748	62.6388	62.4625	42.5802	39.1445	43.4715	58.813	41.3664	31.4459	35.2343	37.1242	32.1639	37.9545	33.996	61.3127	37.5614	34.3315	37.0514	30.0724	36.8829	36.8121	34.1005	56.1843	32.4865
	88	53.1337	43.718	49.2263	45.3864	47.3681	42.4954	58.2426	55.4673	43.3226	38.4208	42.8923	58.0903	36.0231	30.1861	29.2201	36.2181	33.1004	41.0898	36.247	54.4666	37.9271	30.4758	39.3406	31.4436	35.2848	39.8174	33.8731	49.5	31.6005
	90	52.773	40.3898	51.2016	41.4388	47.7585	48.1585	62.2274	55.5576	45.3188	37.9622	40.957	75.9664	41.5288	31.7516	32.3616	37.0472	33.6974	39.7748	36.5329	63.8703	39.8577	34.1358	34.4182	31.9584	32.1417	35.7244	33.0651	58.7419	32.4231
	92	56.8208	41.178	50.5664	45.8119	47.4211	42.51	61.7424	57.6192	46.767	39.2245	40.2205	73.9788	43.4262	31.782	34.8665	37.1695	31.1081	36.8667	36.868	64.5312	39.958	32.2072	39.4469	33.3038	37.4628	38.7915	38.3814	57.3401	32.7149
	94	54.2989	40.3082	51.9954	45.0404	50.145	44.4027	69.7191	66.4896	45.3786	44.688	43.851	70.5891	44.0283	33.9572	35.217	39.4644	33.8067	37.091	37.088	61.8862	41.2137	36.5225	43.49	33.2105	37.9961	42.0257	42.6978	48.1165	35.887
	96	59.2018	38.5737	51.4388	45.3138	47.7969	48.3853	60.6213	65.6837	46.6908	44.0637	42.8131	67.19	42.0633	29.754	33.8782	41.1315	32.3035	38.8495	36.9316	61.5204	40.3431	32.4518	38.4948	32.8454	35.4667	39.9207	36.4266	57.7142	33.2965
	98	58.3281	45.3306	57.8079	49.8126	52.5992	47.7565	68.4116	69.1978	47.8698	46.5167	47.5642	69.5182	46.6446	31.0765	34.6931	43.9935	33.7208	37.9437	36.8287	65.0385	43.4018	29.1156	39.8094	36.7435	40.6861	39.1239	37.6341	60.5407	32.6554
	100	55.864	49.6965	53.8701	47.3841	55.5191	50.619	60.5729	61.9651	46.4089	42.3777	43.8434	58.7701	45.6244	30.9534	36.1736	40.2413	36.1883	42.425	38.5237	64.3259	46.0173	37.5583	41.3885	33.5342	40.3543	38.7938	36.047	56.8931	30.8133
	102	64.1997	44.4452	54.1664	50.0978	51.5002	53.0397	68.2506	70.3826	52.7031	39.6385	49.8378	78.2587	48.9633	37.9372	40.3919	39.9761	34.8335	38.0252	39.1162	59.4816	46.2553	36.6705	46.6383	35.1972	37.0198	43.7519	39.3267	57.1001	34.9694
	104	62.0812	41.6469	54.3424	52.0727	55.9206	45.3384	62.6382	71.9397	48.311	42.9176	45.1786	73.0627	40.7072	30.6451	38.7179	37.7929	36.0327	34.1529	35.7187	64.1293	42.0309	30.7668	40.9732	33.9316	36.2809	42.4076	35.8365	52.1468	33.5061
	106	60.0668	47.3011	58.2672	50.5162	50.5125	50.6228	69.308	68.241	47.0434	45.8725	46.2384	67.2347	48.6611	38.3558	37.6537	42.5165	36.4025	36.8325	37.9871	70.2602	41.4582	32.9878	47.41	33.1916	38.4572	42.5925	39.6736	58.0088	36.7052
	108	63.3521	45.6947	56.6556	50.0411	53.2462	48.7244	66.2778	72.9764	47.6362	46.5771	50.9768	62.8637	46.2294	30.348	35.3551	38.8232	33.8941	34.6897	35.5853	58.9948	41.4144	34.2657	40.415	34.5467	40.5963	44.0092	42.5186	57.9503	31.6378
	110	61.5438	48.746	56.7328	52.3784	55.5248	53.0178	72.3281	73.4988	61.423	45.2377	54.4996	74.5656	44.1039	31.0896	37.8385	43.2111	37.2701	38.1644	38.4587	71.5637	44.8125	32.9062	42.1819	30.8733	44.3167	42.1675	39.4409	57.3724	34.306
	112	64.0952	47.5564	54.8286	52.777	57.7269	57.2425	70.166	73.456	50.6712	42.705	47.7822	64.796	41.9936	32.9492	38.1979	42.1835	33.2117	34.3584	36.8411	72.1502	46.2526	35.912	42.8797	31.6454	37.6999	40.8799	38.9611	50.6845	33.7968
	114	63.2807	46.6533	60.0023	55.8283	58.4476	54.8201	66.7113	73.0394	51.8347	44.0649	46.1542	72.5848	45.9135	33.3451	36.8823	42.1287	36.4951	37.4167	39.701	61.9859	44.3291	35.9181	40.7374	33.1443	35.1361	43.9228	41.8736	54.1559	34.6666
	116	60.3697	49.2883	54.1178	54.6458	53.2676	53.5579	63.6274	70.6991	53.6407	46.4469	52.1819	70.7364	39.9731	33.8679	37.9441	39.7415	32.7719	37.6224	37.0854	65.8971	46.6003	34.3065	47.216	35.5898	38.7164	45.6357	38.2579	52.3537	33.7972
	118	67.4841	50.6467	58.3794	56.3122	58.3178	57.1328	71.582	69.0274	51.2185	49.0706	51.314	60.4011	49.0119	32.0427	42.6682	42.8975	36.6755	37.6941	37.1551	70.3232	46.0067	37.4616	44.961	32.8022	42.9142	45.2069	39.7897	60.0751	29.4862
	120	65.0196	48.7719	50.5357	57.3658	59.532	47.8751	71.0455	75.0357	52.6094	48.0968	51.6244	67.2171	46.0651	32.4368	41.2237	40.8429	34.1167	42.0011	37.7538	73.6259	43.592	36.1378	37.9508	33.295	40.2582	45.4913	40.5548	57.2536	31.3853
	122	65.5283	48.0914	55.1656	54.4703	52.9876	50.076	69.9678	71.2048	47.1817	47.9291	52.5828	74.1231	46.0251	33.9793	39.3791	44.1119	35.3143	40.2035	40.9508	68.9654	45.1505	32.5032	45.1917	34.7659	42.1574	45.212	42.1651	69.1593	36.3864
	124	61.5827	46.5796	59.3194	62.1561	58.3004	55.2271	66.9705	63.9285	55.6231	46.7981	54.3651	60.3372	45.1884	33.8945	37.5452	39.9197	35.6495	31.8488	35.0709	64.7275	40.861	36.4533	38.6555	33.9486	42.7757	45.0443	39.5756	56.8959	35.5364
	126	68.7119	53.3628	56.1747	60.6163	59.1103	58.5991	71.5081	76.6909	52.6732	51.2567	52.308	63.1561	47.6272	29.6568	40.7331	42.0156	37.4976	41.5877	39.1791	67.5351	41.3182	35.6269	46.3861	33.775	41.6539	43.8878	38.8096	62.4425	36.1097
	128	71.2341	47.331	56.6135	57.2064	60.8688	58.7834	74.5062	68.1442	51.7737	50.5762	52.0294	79.3345	42.398	31.2499	41.1584	41.8627	38.6955	35.4533	36.5395	67.1853	44.1348	34.3301	39.5293	35.8104	44.182	42.7989	39.4869	57.9237	34.4594
	130	64.9169	47.0415	55.1946	59.9929	57.6073	58.1395	74.795	70.2775	49.7029	46.2863	59.8587	75.26	43.431	36.3246	38.2637	42.807	38.093	33.4752	37.3019	73.0807	45.2666	32.9384	41.6347	33.7877	40.5296	43.2144	41.1239	63.8718	34.7039
	132	66.0167	52.2741	60.6434	62.5214	56.7857	55.6261	69.8096	73.6358	53.6861	49.5044	52.0824	63.3597	41.6636	34.2892	40.8584	41.4883	39.0595	35.6201	36.7628	70.1481	42.7141	35.0184	39.1831	28.2828	38.947	40.8901	39.8389	53.3518	34.888
	134	63.6108	49.4715	61.0852	59.6415	57.8685	58.4141	65.5315	72.0797	53.6492	46.7899	49.2917	60.1756	42.3623	36.5126	38.5417	38.3994	38.8413	35.5431	38.632	61.3442	46.3979	35.2307	43.7138	32.9237	43.1533	46.0127	41.7559	52.6705	33.0248
	136	66.0516	49.2993	58.5216	59.028	59.4527	62.93	78.6253	62.8571	55.1579	46.8293	53.0907	70.4632	40.0296	34.1269	40.7677	42.7994	36.1685	37.5303	37.998	74.1925	45.0104	33.5642	40.8098	29.2998	44.1488	46.1389	40.6576	57.3549	32.9429
	138	64.3448	48.1212	56.2247	59.9611	54.4211	56.0014	67.1845	71.1864	51.7499	47.196	54.8789	66.5139	48.2565	35.4322	41.2852	42.1181	38.5699	36.4736	35.7074	66.13	42.262	32.2608	43.7264	35.1373	37.9226	45.1871	37.626	53.3412	35.4469
	140	66.2481	47.2548	55.0647	56.379	57.5157	48.9994	64.6709	68.4964	52.721	49.0976	53.0757	63.0273	46.0592	32.3522	38.3406	41.3684	38.4226	34.3683	42.1227	61.1004	39.2374	37.0336	36.8617	34.5228	38.9266	44.3662	38.4205	56.8688	35.936
	142	62.7418	47.0215	53.6826	60.6338	51.2844	59.5381	66.3245	66.4384	54.0452	42.2938	56.1624	60.2393	43.591	35.5579	41.6874	40.4789	36.6213	33.7004	37.3265	66.1591	44.448	33.2648	41.9408	30.5382	37.3526	44.3801	38.3706	55.9267	33.8041
	144	64.4491	53.0046	51.7486	58.7541	61.1185	57.1422	66.7098	66.1775	54.8786	45.6166	52.7747	68.0174	40.9938	33.428	37.7827	41.7819	35.5978	30.709	39.9727	66.4309	39.3896	34.4896	42.0121	32.45	45.4481	48.3602	39.4785	49.9443	32.8827
	146	67.133	49.3591	53.6574	58.9469	56.0989	54.9301	73.4949	69.6029	55.3203	47.9399	53.824	63.5991	47.643	34.9996	41.3483	41.8869	39.6396	39.7359	40.1503	61.4274	43.6524	36.0517	38.9189	31.0737	40.9893	44.384	41.857	55.4405	34.4754
	148	63.9336	50.6503	59.2509	56.3374	58.539	60.9885	67.8799	64.6021	51.6967	46.2839	51.7588	62.3035	42.2378	37.2254	37.9874	40.9588	37.9747	33.3556	35.2149	62.0525	40.6339	36.4745	41.7484	31.1346	39.8257	44.3678	41.1133	57.785	33.9416
	150	58.0791	48.1654	55.1142	58.8453	55.1257	55.1977	69.1052	60.9076	51.128	46.4057	53.7636	65.4113	39.2311	34.9163	38.3677	43.1629	36.636	36.4912	36.7344	63.2225	44.3166	36.5997	43.8669	32.76	39.4468	45.6726	43.0065	51.4003	34.5078
	152	68.1255	46.2711	58.2054	55.8989	60.7892	54.9776	67.1083	65.6759	51.0924	47.8897	57.5402	58.8815	42.493	33.2356	43.3712	39.6809	36.9916	28.4707	38.2734	58.8697	41.4568	33.8819	41.969	30.1916	40.1801	44.0992	36.3969	55.8201	35.0816
	154	64.181	49.22	54.0468	58.6718	56.083	56.59	67.5806	75.7668	54.1818	48.8043	54.8075	66.9622	48.541	33.3489	37.9094	39.5054	35.5636	33.0274	37.2259	64.7238	43.6903	36.6434	42.9777	31.1591	38.4665	42.7692	40.526	53.6258	36.3771
	156	68.303	48.5505	57.4429	60.3464	60.1194	56.2694	69.0937	67.8495	52.8178	51.8193	54.7034	58.8464	39.1368	35.968	40.0007	40.5589	35.5422	30.7182	37.2518	64.4029	42.5892	36.4784	40.1832	30.5589	36.7454	43.7787	39.2291	55.6469	32.8491
	158	66.4188	50.664	50.3913	57.2219	54.9173	59.4749	68.1022	58.3418	48.5539	46.0876	57.8156	62.6121	46.7506	40.2541	39.5344	40.88	36.203	35.7804	36.2164	66.0678	41.4856	34.2639	38.0899	33.0105	38.9265	41.0169	37.0226	52.0191	35.9651
	160	71.9764	53.9518	57.758	59.8897	57.3879	59.2204	71.3647	69.6785	54.7501	48.5488	58.7325	58.5692	50.6644	36.0298	40.1857	41.2529	35.9419	36.0932	38.0117	66.1044	39.0375	33.7363	44.4096	34.9345	41.0065	44.2081	39.9514	49.1663	32.3636
	162	62.7312	45.6741	49.5888	56.0937	57.9878	51.3649	69.3285	56.8068	50.0224	43.6236	54.3882	60.6838	38.6042	35.0822	40.6728	47.8564	37.343	29.5488	36.282	65.4081	41.2627	31.6534	41.2846	32.3039	42.2414	41.2728	39.6707	51.8684	33.3447
	164	64.6262	52.4881	53.2411	64.3495	53.7739	60.4405	65.8968	75.8561	51.5342	47.3297	53.833	69.4284	39.5741	33.1638	38.6066	46.4793	37.7831	30.5915	35.2556	60.0201	40.848	34.1307	41.5658	30.9899	42.2944	43.4224	41.3714	48.2827	33.0191
	166	64.102	46.1682	53.5778	57.3029	55.5195	52.7057	65.5945	69.4069	47.5499	47.3272	53.6512	56.0577	42.8803	37.9814	43.115	46.6824	36.3998	29.3037	37.0254	66.5666	46.6399	35.5211	42.0397	28.6784	40.043	43.8177	42.7895	58.1415	33.7379
	168	64.9979	52.646	54.5527	58.9423	56.5329	51.4344	66.7555	70.4848	54.5912	44.8634	55.2204	66.5647	42.7315	34.5381	42.915	40.7565	34.3725	35.665	35.3976	63.7134	41.3684	34.2804	43.1682	31.1779	35.7403	44.2734	36.9468	53.2122	31.0698
	170	61.7901	44.3994	53.0082	56.6625	52.8208	52.4232	66.0245	64.8224	45.3273	43.4433	50.3762	54.5162	47.8684	37.1255	41.5724	39.7957	40.3478	31.6778	38.1721	62.181	38.4383	38.3883	46.6909	30.6425	37.077	45.0519	37.9224	46.5545	29.937
	172	60.6728	47.0806	52.2269	59.1195	56.6051	51.2922	66.1659	58.2404	49.3288	46.3212	55.6117	48.6226	43.0539	35.2622	41.9182	40.4114	36.7965	28.7374	33.2351	58.2444	39.4868	29.8428	40.3157	29.6732	40.8123	42.2571	41.5174	51.8826	32.6207
	174	63.663	48.3384	45.9625	57.7456	52.533	55.4675	63.0042	68.6256	50.3933	44.4714	51.812	57.2504	40.739	34.269	40.0026	41.0346	40.5717	33.5294	35.4639	55.6362	37.8195	35.9871	38.4902	31.7124	43.8864	44.0075	40.3225	49.8157	29.8973
	176	65.3546	46.544	49.6241	55.2325	50.3895	51.6862	69.1227	70.1511	47.9492	42.6353	54.9519	53.1816	41.6627	36.0454	41.6822	40.6018	34.1783	28.9804	32.0813	54.6109	38.4853	32.5183	37.468	33.4379	39.8526	42.8091	39.3289	45.0502	35.3924
	178	64.2669	46.8035	50.8084	56.056	53.7358	50.9902	61.5111	58.2828	44.9642	44.927	47.0059	58.1381	43.8049	30.4728	40.8822	40.9468	35.9019	33.5437	37.8122	58.7943	42.7398	36.4219	38.7231	28.7843	43.3867	42.5721	39.9599	52.857	32.7251
	180	63.0992	50.3038	50.4984	59.814	57.0212	55.7419	65.012	66.6478	45.9566	43.596	54.8849	52.2726	41.4407	31.7468	39.4288	38.7073	37.6599	30.6163	37.4686	56.6523	39.6194	32.4399	37.6756	28.1041	36.2178	41.699	39.9205	49.5667	30.3325
	182	54.034	45.0781	51.4102	53.3913	50.4869	52.2965	56.3576	61.7176	46.1389	44.4969	51.6119	66.2295	44.1938	31.5038	40.244	42.8251	36.8658	32.2378	33.3279	56.4165	40.6787	34.2035	39.6531	29.9832	39.0671	41.8694	39.2727	51.608	33.5428
	184	58.3918	44.9912	48.8285	55.2879	51.7167	57.0912	65.2871	64.2513	46.1669	48.0124	53.6825	51.6166	35.9203	32.5243	38.7545	38.0389	33.5383	32.7597	32.7452	54.4627	37.6599	32.2716	36.4821	33.8122	37.7298	38.8041	38.7981	43.3219	32.2603
	186	61.3231	45.3498	47.6278	54.916	57.2566	52.035	62.8371	62.3991	48.3796	44.0019	56.4977	59.2336	39.7456	28.4166	41.3788	37.5304	36.2489	31.9396	35.4861	53.1432	36.9125	31.4707	37.6568	32.1681	37.3467	45.2921	38.7476	56.2981	32.6784
	188	60.7395	48.8172	56.1766	55.9616	57.0769	59.3238	59.9777	59.8429	45.2242	46.7048	55.1583	53.3251	45.6355	34.9224	39.7529	38.2304	35.008	29.6452	33.784	52.5705	36.5754	28.4569	38.1351	30.6145	37.3178	42.8171	38.6027	48.9207	29.9844
	190	59.333	46.9604	47.2272	52.1268	51.8769	51.0583	60.9385	69.5948	45.1871	44.2887	56.1071	59.2983	41.7504	35.3546	39.1114	40.1778	34.6715	30.2918	34.5556	63.8163	35.8385	33.712	39.986	28.3549	39.6566	44.4394	37.5954	45.7116	30.9639
	192	63.5528	47.6459	48.3413	53.4505	49.6856	54.7205	63.2822	64.2926	52.0552	43.509	54.3664	52.1482	41.122	33.2682	40.6373	38.7828	33.921	28.9974	32.7428	54.0532	36.3737	34.08	40.7224	27.0101	36.3899	42.2345	35.4621	49.2277	32.9358
	194	58.1605	47.9474	50.884	54.2536	53.1733	53.5137	68.4759	63.0373	44.1436	43.0564	54.094	55.0262	38.3726	36.7039	38.1926	36.6754	33.6296	29.8577	34.3981	59.5544	37.0806	30.164	33.3746	29.5771	35.1783	40.2031	37.3168	54.9073	31.7862
	196	56.0445	43.9583	45.0619	52.7288	55.8686	50.6748	64.1133	65.2586	45.6299	44.1023	56.7083	48.4537	40.715	33.2663	36.4588	39.8856	35.834	30.0929	36.1439	54.955	35.0219	31.0052	34.544	25.8249	36.8951	42.2297	36.0805	42.8202	32.8349
	198	55.9559	45.556	56.3255	55.0261	52.5157	52.6562	62.217	62.77	49.4531	42.46	53.0267	55.0286	38.131	31.8336	39.7215	40.2752	35.1901	32.4346	34.6104	57.0311	36.0879	32.194	38.2115	27.7375	37.6358	40.9168	34.3953	47.4478	30.4071
	200	62.0764	44.742	49.2012	58.2012	51.5825	49.0296	64.0543	58.661	45.855	43.9582	47.0695	56.8272	46.2077	36.4276	42.4277	40.2254	33.5353	31.2775	33.7437	61.8587	37.1483	35.3998	40.4517	29.4985	39.2654	40.1347	38.3925	46.8692	29.7317
	202	63.0987	45.3413	47.8271	58.535	50.3673	51.6691	63.8836	60.8465	43.5658	45.9298	49.5401	44.3942	37.198	34.13	35.7792	38.4809	33.0844	33.0361	33.8705	51.9037	34.4198	31.7092	35.6893	28.6191	36.9383	41.9353	36.5413	47.5189	32.0103
	204	61.3123	45.6043	48.156	56.0798	51.1159	55.438	58.0059	64.3819	45.3659	44.8071	51.3478	55.9297	40.7064	32.2981	37.9982	44.0147	34.8307	27.7366	32.9725	49.0436	36.9553	31.101	36.5735	30.6678	33.5976	39.4078	36.3512	50.0362	33.2239
	206	60.152	43.9402	46.2405	57.6748	53.0865	49.6263	61.7457	68.0447	45.2331	45.431	51.8767	49.9532	39.5802	33.9659	37.7598	38.6802	34.5032	27.9442	32.5956	53.2157	35.9866	32.2323	36.9305	29.8702	34.4324	37.212	36.5664	44.13	31.7718
	208	58.5386	43.7398	51.6405	54.3395	54.7334	46.375	63.4914	59.4641	47.8188	45.8602	50.7032	56.605	37.6936	31.2957	38.5598	39.2637	32.9105	29.7444	32.4138	55.387	35.3296	29.7155	34.8868	29.3278	36.8803	41.3956	38.4145	47.3942	29.7729
	210	59.9149	45.7011	47.6885	47.5766	52.9014	49.6311	58.1884	61.6764	46.8273	42.3726	48.4879	51.1492	40.5068	31.9676	38.8485	38.2395	36.2734	29.7822	33.7204	52.9378	34.9107	32.1664	38.0638	28.6657	36.9108	43.1101	36.951	45.373	29.7359
	212	58.5335	41.9307	44.5592	52.9197	55.0724	49.9688	57.5919	54.4655	42.4628	37.596	51.4877	49.3953	39.8646	33.3953	36.8179	37.6951	32.1912	31.0504	32.127	54.583	37.8219	35.1956	33.937	26.4342	37.0124	39.6978	37.3915	45.5903	33.176
	214	57.6655	40.5786	44.8395	56.3619	51.543	49.8192	60.3209	65.0031	47.6817	43.6338	53.6059	53.2429	43.4222	35.3926	40.196	35.4841	33.3489	29.2683	33.4104	50.791	35.2604	31.1943	35.3966	28.7064	36.1937	43.202	35.5052	48.6029	29.4197
	216	55.8167	44.693	48.0363	54.199	51.1378	50.0509	55.4935	63.5199	45.2361	38.3336	47.5403	52.7903	41.4264	32.6956	36.4622	39.8797	34.0242	33.228	31.9411	54.2915	34.7878	33.4483	34.4185	28.0797	40.1613	37.278	39.3459	53.388	30.4602
	218	62.4469	44.7504	49.0952	56.151	50.1818	52.2537	57.9924	71.2115	46.6475	42.3232	52.7693	56.7722	38.9947	32.3271	40.2476	40.4369	36.0646	30.1841	32.7644	47.5516	33.8607	32.7396	39.3718	29.892	35.1048	37.1539	37.4446	45.9121	30.2452
	220	60.2642	43.2782	45.4982	53.6481	49.784	48.0202	56.852	54.5648	44.8952	42.8871	45.3843	51.7151	39.9172	30.7682	35.7418	38.8447	34.2735	31.3408	32.8513	56.1544	33.7664	26.4736	38.6121	27.4904	34.3992	41.2925	34.7911	49.7797	30.5272
	222	55.5919	43.426	49.8371	53.8725	49.7795	50.4945	52.1896	69.2269	42.2755	39.3074	47.2275	50.6604	38.7313	30.8403	37.8505	39.6371	34.6879	27.7205	32.316	52.3911	37.9441	29.592	38.1795	29.2683	36.6552	40.5217	36.2544	42.8414	30.2084
	224	55.16	40.8829	44.255	50.2621	50.8601	48.386	54.5489	65.3428	44.8828	38.2849	51.838	47.8426	35.2949	30.4355	37.3375	39.5984	34.9649	28.7721	34.2475	54.0676	32.8919	30.2333	35.28	28.228	37.3437	41.6417	35.6694	45.388	33.1565
	226	57.2604	44.729	44.4387	50.8226	49.1933	47.0563	57.3025	64.0963	47.3806	44.506	50.6292	47.5291	42.2244	32.3192	34.8376	38.6628	30.1716	29.8832	34.4859	51.7149	33.5596	27.2231	35.276	33.7304	36.9795	40.5655	36.4373	51.3296	28.9891
	228	50.0182	41.1538	45.6029	52.3214	48.7226	44.1644	58.2818	59.1729	42.1784	39.9037	48.7692	46.7261	37.7882	32.5901	35.8637	37.0737	33.6211	27.6106	32.4066	50.3915	36.3327	29.2438	34.6709	25.4255	37.7167	37.8676	35.8759	43.4279	30.39
	230	60.5593	41.4208	49.7408	49.0172	45.1846	43.8055	56.2979	56.0211	45.4609	42.394	47.1112	51.8316	39.6642	31.53	33.7531	38.019	32.4883	28.0275	32.3529	51.2448	31.2405	31.4101	33.4566	26.7336	35.8547	36.7872	36.2131	42.0182	31.0571
	232	56.4689	44.7502	43.2403	52.2083	51.929	46.0619	55.4084	59.0147	43.2178	37.0085	49.7066	49.079	35.2313	33.4679	36.4421	37.9682	34.0238	30.4159	31.8555	47.5724	32.9062	26.5963	33.8835	27.4164	38.7655	38.5699	37.3345	41.248	31.6591
	234	56.8007	46.2612	41.9537	49.8325	49.8558	41.7872	62.0485	60.2517	42.9092	40.1991	43.0086	51.0374	33.7747	33.3386	35.8459	35.5776	31.12	30.7895	31.0023	52.9143	32.2902	29.8683	35.4525	25.3755	36.7621	35.5366	35.0258	41.4367	29.0333
	236	58.0423	43.9185	45.2363	50.5094	50.2378	53.4892	57.8957	53.2708	45.5286	41.9936	49.3464	46.4634	37.754	31.6613	38.0834	38.8041	33.267	29.3438	32.1456	49.2231	31.517	29.3898	36.389	28.0368	34.6339	36.399	33.2766	41.2818	30.1218
	238	55.5683	43.1023	48.6145	56.4391	49.6739	44.3055	58.4809	63.5165	47.4577	39.5381	47.6718	42.9848	36.6141	35.7088	37.7543	38.3032	32.3295	30.2279	30.648	43.5426	32.8325	35.2854	33.4316	29.6509	39.041	40.3457	31.3287	39.5536	28.4629
	240	56.0732	43.831	47.1246	49.7311	52.3564	49.624	59.5654	56.8362	45.0597	44.0002	46.4273	45.1581	38.0225	33.901	34.7932	35.8224	30.3625	36.5185	32.0986	46.7265	36.2191	32.0086	31.542	28.4931	38.3967	37.3113	38.0459	47.8262	31.9237
	242	58.9171	40.394	44.0949	51.9892	48.6333	51.2901	51.4549	61.6804	43.516	41.5513	48.5673	45.4119	40.3145	31.6609	35.4505	38.8693	29.6752	27.3392	32.037	45.603	29.8025	29.4649	31.9303	26.5476	33.5699	34.8987	34.5092	43.6544	29.2887
	244	58.1212	43.855	44.8628	52.8347	45.7038	52.1583	60.9602	59.9039	44.3036	42.3215	45.053	41.8307	32.7665	31.5031	33.3888	34.145	32.8175	31.208	30.0514	48.7462	32.0077	27.7844	32.0229	28.0125	34.9254	39.0371	33.894	40.1178	27.6462
	246	54.9877	42.4727	43.0332	50.5405	49.8028	49.8433	55.0132	61.7244	43.7772	39.2242	48.6044	45.7892	36.9833	30.7522	35.658	37.7385	36.0155	30.8183	33.494	44.0982	32.5148	27.5557	31.746	27.6536	38.5045	41.1453	34.6004	49.9799	29.3134
	248	58.5233	43.9035	45.2448	49.7024	50.5814	45.8539	53.2603	61.602	44.4974	40.5937	44.0658	48.9862	36.6282	29.9714	36.7967	36.8498	32.0621	26.501	30.1559	45.5536	31.3616	27.6584	33.2632	27.2392	36.6131	42.6571	37.7419	44.9873	29.5173
	250	53.0769	42.3665	46.5414	49.5125	47.9071	52.2603	55.9257	62.5274	41.279	41.6245	48.5426	46.09	36.5919	29.5202	35.9863	35.9765	33.7019	27.8846	30.6285	49.0473	30.4842	25.5521	34.0272	26.0582	33.2101	35.6408	31.8566	40.5694	27.0244
	252	56.9443	40.954	40.4394	46.9683	42.5712	47.945	51.7332	58.8533	38.8721	38.4877	46.186	43.1218	40.9134	31.8344	35.3728	35.4844	30.0499	30.4676	29.4577	41.6906	34.605	28.323	33.6498	26.1416	36.346	38.4436	34.234	40.8826	27.9379
	254	57.7625	40.3299	44.0044	52.7291	48.5865	50.7434	54.9807	63.0594	45.3724	43.3035	43.37	42.8971	36.1383	32.5247	36.9718	36.2007	32.2041	29.5431	30.8321	44.1579	33.2683	26.7473	35.1536	27.1072	32.0421	37.0018	36.2529	41.7872	29.116
	256	55.7798	37.9969	43.6331	48.0911	45.1223	45.2239	49.6004	57.3366	44.4813	44.4063	44.9412	42.9562	40.6725	32.241	38.3014	38.6244	33.4676	27.4452	29.5607	50.6881	34.0767	29.4644	34.1898	29.5934	34.2073	42.1286	33.2569	45.0788	30.7452
	258	55.7875	42.3124	46.2655	49.4511	42.8213	46.6909	52.5188	64.7225	46.8081	44.2768	45.6219	44.8993	35.3619	30.8756	37.6989	36.7727	31.2696	24.9932	28.5046	39.5603	29.016	26.7624	32.7071	25.4631	35.6817	36.2485	33.254	45.3402	28.1067
	260	57.3572	44.7212	41.8609	49.4042	49.7592	45.3997	53.3804	63.5685	41.2023	40.1918	44.3125	44.7667	35.9092	32.0486	35.8243	34.005	32.1608	27.0811	29.6643	44.4893	30.4361	30.8247	33.1831	25.7391	35.192	35.5829	33.7506	42.1461	27.9726
	262	55.7213	44.0448	48.3251	50.498	50.0793	49.4318	56.06	63.0544	44.4961	43.4405	51.9742	38.0512	39.2664	27.8959	34.2659	35.8568	32.13	28.792	28.9148	45.6562	30.0687	27.388	33.3865	26.2902	32.5982	37.2089	34.1996	44.6921	27.8964
	264	57.3752	41.0495	41.5533	50.2558	42.3712	49.6254	54.4632	57.9184	38.851	41.4645	45.5749	47.9324	37.1922	34.4308	36.0113	36.1543	30.2471	26.7174	31.8318	47.8848	33.8429	27.4263	33.9669	25.8121	36.96	37.6541	36.7149	43.8243	27.4698
	266	54.9907	40.7317	43.8268	52.4306	49.1801	45.0718	53.4177	59.2625	42.9829	37.0944	43.5316	42.0291	37.3948	30.1251	34.4972	35.1823	26.0545	27.1206	29.2241	44.0052	30.7718	24.4485	32.7358	26.9561	35.7043	35.6575	33.8443	39.8103	26.0383
	268	52.8543	40.5932	40.6236	47.9386	46.4939	43.1951	52.0757	59.3615	42.908	42.1398	47.0835	41.4865	40.203	29.3114	34.3422	36.9718	31.2307	29.0454	29.7809	50.2688	31.9623	27.7419	32.5916	27.3486	35.8455	38.1133	33.2482	43.7946	27.9746
	270	54.3861	43.842	45.2784	50.8048	45.078	49.325	51.8456	57.3566	44.1116	38.0056	47.0569	37.643	31.6317	30.3448	37.1381	34.9255	31.4611	28.7402	30.9971	39.316	30.6717	27.6314	31.9119	27.6426	33.8792	36.0333	33.1927	44.3615	27.5009
	272	54.2136	40.3199	43.6151	44.779	43.1459	47.0896	51.1625	54.6308	41.0956	40.314	45.3097	41.7293	39.4008	29.3895	35.5048	34.3068	31.187	27.2917	29.7254	44.5421	31.9098	23.2257	33.2409	27.2502	33.5427	35.7853	35.2156	44.9893	27.3917
	274	54.0352	40.6785	43.6149	48.112	46.3268	45.3557	52.2372	61.8462	40.1789	38.2952	44.5884	40.4558	32.9642	29.113	34.8809	33.3009	29.2135	27.8489	30.8592	41.228	31.3936	25.8674	32.4268	27.827	33.3377	35.8656	36.0925	45.4518	26.123
	276	56.7721	41.829	39.433	50.7851	46.517	44.3508	50.9862	58.9303	40.9982	43.0196	44.7854	40.8264	36.1728	28.6718	35.406	36.7031	31.5114	28.6748	30.0332	44.5774	31.2525	25.6942	30.551	27.0562	34.0967	36.4683	32.9569	38.3894	25.5147
	278	55.1282	41.8017	41.9577	48.3055	49.6691	51.7376	50.8599	55.2375	41.1767	41.4511	41.886	41.7527	34.9217	31.641	33.0912	36.0744	28.4255	26.1574	28.1498	44.2059	30.467	25.1488	29.9462	26.0629	34.3079	34.5192	33.7659	39.9823	27.046
	280	57.6201	38.9982	47.6516	46.8951	49.2179	43.7973	51.5814	56.7208	42.0617	43.0919	41.4021	40.0566	36.086	27.9318	37.247	38.0653	31.7321	28.397	29.4446	43.6732	34.5935	27.5504	30.904	29.4194	36.6186	34.7594	34.7476	39.6237	25.3269
	282	54.4703	39.875	43.2783	51.9979	46.3632	40.9502	54.1342	64.5144	39.454	44.0783	46.2092	41.0244	33.7853	30.4826	34.2505	31.5622	29.7384	26.7395	27.6325	41.6058	30.4436	24.1974	31.3572	29.2685	31.5001	34.3441	30.5021	39.8661	25.6664
	284	54.7807	41.5866	43.5637	49.482	50.6091	44.4338	53.1468	52.5749	43.8544	44.6578	45.5854	44.9608	39.5341	28.6238	39.3318	39.5295	32.9194	25.777	31.2086	37.0856	35.0137	28.0307	32.5727	26.8236	33.5307	38.3061	33.9226	38.9857	29.5383
	286	49.4595	42.1439	44.9092	52.4234	44.1748	43.6982	46.6483	59.0677	44.2129	37.4296	43.1336	40.7451	42.2932	31.7397	37.2116	34.725	31.0886	24.2886	28.811	40.9234	32.6608	26.7112	33.2088	26.8832	32.4788	36.9103	33.1016	39.346	29.5329
	288	52.8266	41.4779	43.663	44.3977	46.6478	43.5601	48.6554	56.5058	43.671	43.299	48.505	37.4318	38.7845	30.8653	36.3131	36.2406	30.1693	29.5409	29.9306	45.6398	32.6234	25.9091	30.4698	31.2308	34.7909	31.8802	32.7966	43.6652	30.3794
	290	55.6716	42.328	43.5469	46.8848	47.8207	48.1728	55.9378	59.9734	40.0236	40.2936	43.9643	41.4676	35.4067	29.0536	34.5876	34.5032	30.4386	25.9577	28.4095	43.8671	33.3283	29.0775	33.2758	25.4702	35.2043	36.5942	31.5406	37.4549	28.0775
	292	51.7257	38.2827	41.6905	47.1249	46.1889	39.6836	49.8193	55.5124	42.1744	39.2797	40.193	40.6971	40.3764	28.7565	35.567	33.0547	32.211	25.8641	31.9895	45.9227	33.1269	26.3886	32.6399	31.3797	34.5275	36.3066	31.927	39.391	29.4216
	294	50.8919	41.5533	40.4559	48.7626	43.3024	43.8116	46.0541	56.8868	38.2418	43.3577	45.1973	35.5504	35.0133	32.6212	39.2502	38.8908	30.6018	29.3868	30.4046	45.1633	33.2295	26.7627	34.0779	24.8904	36.901	32.4815	33.6338	42.1656	27.6297
	296	55.6566	38.5123	38.8987	50.144	46.1373	43.3572	52.2608	57.7858	40.6986	39.146	42.3318	36.9839	36.1033	31.9723	32.9364	36.4001	31.6911	27.1153	30.5307	40.196	30.9909	28.6767	32.281	23.8998	33.4007	36.6884	33.3146	42.2101	25.7362
	298	52.7716	40.7556	39.9319	49.5634	47.481	45.9813	51.9928	59.7396	38.6594	41.5318	45.1655	47.3617	33.475	31.5983	35.527	38.125	29.5018	26.7994	31.0236	43.0448	32.0009	29.2812	31.8611	26.3796	33.5025	38.0708	34.4951	44.0743	27.4307
	300	54.225	41.0748	41.825	46.5311	43.0786	49.1469	51.0203	57.5896	37.8701	40.5444	41.8548	36.1537	37.5974	30.4528	34.9065	34.7532	32.1675	24.0961	30.7475	48.1889	31.3318	26.6688	30.2408	26.2825	33.3005	36.8446	33.0054	44.4597	25.9595
	302	52.7076	38.2327	42.5897	45.9825	38.6798	40.8785	49.3742	48.0005	36.458	40.5937	41.3319	36.1801	34.5279	32.5172	35.2446	36.8149	30.0738	27.439	29.927	39.0979	34.7511	27.6597	31.562	27.6624	31.0888	33.7953	34.1291	38.4216	27.5294
	304	53.9499	39.5408	45.2444	50.547	45.8223	43.7971	50.4088	59.7166	39.4552	42.3071	42.8661	39.2079	33.3364	29.3616	31.8497	32.95	31.1467	27.2287	27.1747	43.8677	32.8298	23.8623	31.4595	26.5486	35.0515	34.0457	30.079	36.7981	26.3686
	306	54.186	43.1348	44.7195	45.5896	43.429	43.5968	45.5177	58.1994	37.9936	43.3426	45.2438	41.574	33.6891	29.1981	33.9376	37.3751	28.2274	25.7929	27.8881	48.2976	30.4566	24.2062	32.532	26.7954	31.5341	32.5961	32.586	39.6536	26.8293
	308	49.897	40.1871	45.7278	47.5956	45.6701	42.678	48.3499	57.6902	37.5904	39.027	40.6452	37.5315	34.2742	30.5752	34.8149	34.1958	29.5365	26.8457	27.208	36.4963	31.4203	25.6977	32.3103	27.9164	33.9445	34.9068	34.462	41.4365	26.6293
	310	48.7035	39.9044	40.5637	47.5457	41.2292	45.5715	50.4633	54.1503	38.9413	37.1917	43.8769	39.2245	31.7891	29.86	33.4886	35.305	30.8687	31.0391	27.8048	38.9671	31.0227	28.9743	27.4558	25.5853	34.6234	33.409	35.4307	41.9906	29.0427
	312	52.1049	43.6296	42.3827	47.3682	46.949	48.9707	52.8104	62.8422	41.4821	41.0051	46.713	36.8869	34.3126	28.5579	34.8783	32.9465	29.6382	25.1209	27.9725	44.563	34.0962	26.6234	32.3265	26.0109	33.938	33.6499	32.6649	37.3579	26.6447
	314	48.2914	43.1593	40.5817	44.6178	46.4999	40.3794	52.4844	58.3884	38.1424	38.7349	43.5137	39.4029	35.5155	31.0993	35.2586	38.6831	31.4709	29.0477	28.3189	43.6982	31.9975	29.539	31.3143	26.1179	36.753	36.9868	30.6047	39.373	27.2315
	316	57.1005	43.3915	45.0272	48.3203	41.8318	45.1524	50.5721	65.0553	41.2575	43.77	42.9841	35.7153	35.7349	33.0275	34.1418	34.0953	28.6814	24.6941	28.6293	41.3051	30.7497	26.6352	32.2363	26.7819	34.1249	34.7377	32.4299	40.9431	28.7499
	318	50.4697	38.2447	38.7604	47.8746	40.738	47.0883	43.5375	54.0113	37.5264	41.5818	40.8899	39.4128	36.5462	25.6168	33.1604	33.33	30.3353	27.3203	30.6993	39.2603	31.9379	27.7029	30.9131	26.0884	32.0918	34.6783	35.3639	40.3674	30.0315
	320	52.0933	39.117	44.5798	48.5653	42.7183	48.3037	50.8589	58.1878	42.0322	42.2003	45.6606	38.8212	36.7075	30.5523	30.5494	33.9565	28.505	25.9984	28.0531	43.1574	32.6359	25.4597	32.6119	27.648	36.8145	36.4508	32.9256	42.7688	27.8619
	322	50.4906	39.6696	40.625	46.8513	44.9505	44.6234	46.4995	53.1533	38.8511	39.8751	40.5475	38.4326	33.5727	32.9298	35.6533	37.1907	29.0818	25.7563	28.8107	43.9256	32.5266	26.3447	35.5291	27.3486	35.0637	38.9025	34.8646	41.9563	27.4772
	324	52.3629	39.1826	42.2285	48.3015	44.6838	40.0685	48.1453	54.9862	39.3579	42.5979	44.5274	39.9598	34.3192	31.7121	30.561	33.2313	29.3964	28.5629	27.9435	36.2729	32.4244	25.2786	30.5728	26.2349	32.4482	32.7903	33.6422	42.8719	26.813
	326	54.6053	38.8682	42.9404	46.0503	44.3611	41.5525	48.6789	53.8274	38.6584	37.8164	41.9739	37.8643	30.9828	27.5387	33.8751	32.2446	30.2583	28.601	27.2926	41.3794	33.3219	26.3988	27.5073	27.3553	34.098	32.6425	33.4015	40.186	26.3502
	328	53.7936	41.8635	38.9181	47.8361	49.4274	44.0948	47.1343	62.8271	39.3964	40.9475	42.8041	35.7393	33.7131	30.7183	33.385	37.2992	29.812	24.6598	27.7186	45.0068	32.9074	26.4311	33.6585	28.298	33.1578	33.0866	32.4626	36.4263	27.7365
	330	49.8925	36.6906	39.8055	44.3585	40.706	47.5191	44.4982	54.1627	35.5921	37.6688	43.6817	36.0947	32.6269	28.8387	34.3404	35.9978	30.3164	27.508	27.7958	34.652	32.1025	28.6735	31.1388	30.0641	32.3542	34.8106	33.6059	46.2755	26.3098
	332	53.0809	40.5065	39.8229	47.6308	41.0072	39.4952	43.9183	63.6323	39.7026	38.7638	43.9849	35.4113	34.5677	29.9412	32.7517	37.2619	31.1175	27.4532	27.4851	40.2084	32.4682	26.0422	33.8625	27.9766	31.6222	34.0047	31.9064	39.6758	27.3984
	334	45.2892	37.7097	38.1695	43.9328	44.2167	43.2244	47.6345	56.058	37.364	39.0914	39.6128	36.8644	34.7579	29.2876	32.1332	35.586	29.2551	26.436	28.1887	41.0192	32.5276	27.4114	30.4721	27.1829	31.3395	32.264	33.732	37.7209	24.4848
	336	51.217	42.2957	40.5839	41.8491	38.8991	44.5428	49.263	59.5073	39.1146	42.8178	40.053	36.3688	37.0779	31.1837	34.9273	32.2865	26.5111	25.2144	29.1623	41.4885	30.2698	24.6324	31.0991	28.5203	33.6677	37.9733	34.2176	40.8692	27.2753
	338	51.2129	41.118	38.7042	45.6122	42.3196	43.6022	48.1468	59.7468	39.3579	41.8557	41.5407	39.1084	36.5908	26.3066	33.1716	32.4344	30.2864	25.6723	28.3558	37.5432	32.6614	26.0645	29.5039	28.1516	31.8525	34.9626	33.3081	40.2264	28.0378
	340	51.1322	38.8212	39.1286	49.0374	47.2497	40.9327	47.304	51.7011	36.9516	40.3201	42.0294	35.9288	32.7211	27.8709	31.1649	31.9974	27.231	26.1874	27.6937	39.2913	30.0997	26.7463	29.8533	25.8987	31.9625	34.6592	29.7143	36.1065	27.9717
	342	53.8846	38.3226	39.7698	46.3089	42.2119	41.5749	46.1325	52.5415	37.3558	40.0208	39.5373	36.7445	35.6	29.3811	34.4635	33.5415	27.2012	25.2314	29.6604	43.3924	29.9931	26.884	30.7488	26.8451	38.3925	34.65	31.5312	42.9487	28.4712
	344	50.6514	39.6747	38.0471	44.8571	42.1767	45.8451	45.068	59.8785	35.5609	37.7026	37.1266	39.5713	33.5299	28.3198	33.0664	31.6441	26.1786	25.5802	28.1368	39.557	29.6413	26.3117	27.2529	24.0351	32.1827	31.6442	34.0943	39.4664	25.0574
	346	48.7056	42.7411	38.2409	45.4643	39.3904	43.4712	45.1119	53.0501	37.4121	38.7852	39.2285	39.4967	36.9217	30.3125	35.1713	32.8796	31.6276	26.5374	29.8044	37.8365	30.578	26.8363	31.0187	28.1763	34.1756	34.418	31.4503	38.1729	27.5038
	348	51.6152	43.4343	43.3722	44.0132	42.4945	41.9782	47.06	59.0678	40.2802	41.7548	43.3666	39.5517	33.8465	32.9983	33.3554	32.5897	30.3669	25.2806	27.0278	43.1831	32.1889	26.5814	29.2302	25.2236	30.7733	36.6799	32.0401	38.3098	26.1599
	350	53.9438	39.1559	37.6816	46.422	43.6372	36.3416	45.4723	53.26	35.2804	42.09	36.8152	40.3057	33.2563	27.0019	34.6099	36.0816	30.3943	29.9576	29.1713	39.5299	33.1696	25.6932	34.0739	28.0986	32.9443	34.4396	33.1096	37.9535	25.8563
	352	50.3328	43.2477	36.0461	47.3192	40.7607	38.6484	47.1232	50.6466	38.6294	40.7906	40.0495	37.2352	33.6991	31.1926	33.3708	35.7866	29.9317	27.0985	29.651	36.3533	33.3552	26.063	30.1233	25.9082	28.9843	35.3527	33.6572	40.1032	25.3338
	354	52.2043	38.5347	42.1876	44.1574	41.4238	38.9119	47.5111	57.0169	38.2646	39.8566	38.8056	35.7985	33.9618	27.9601	33.0331	34.0828	31.6769	27.0289	27.2494	38.5926	31.1827	24.2741	27.8124	24.7376	31.4826	35.0435	32.0689	42.627	25.0083
	356	50.5604	38.0087	37.1951	45.2872	39.817	43.6542	47.1381	49.7104	37.1597	40.074	40.4331	37.6609	34.4629	29.4729	32.8127	33.5047	31.1633	27.8284	26.9054	37.8242	31.9882	27.1548	31.5722	25.3108	32.1475	34.5919	31.4998	39.9964	26.656
	358	52.3975	37.6294	38.0437	44.398	43.3631	44.6109	45.3187	49.5685	40.2649	35.4568	36.565	38.2479	31.6726	30.1354	36.3162	30.9933	29.1252	27.9774	28.1781	35.1597	30.1123	25.0556	30.0955	26.1717	31.6332	32.9716	30.4073	38.0991	23.4308
	360	48.9601	39.4958	39.3144	43.5354	43.4725	49.2461	46.0212	50.1779	36.1953	38.6007	39.4743	34.8509	32.6456	26.8576	36.3883	34.1061	29.0036	26.614	28.6155	38.0124	32.2438	24.5477	28.9139	24.6602	34.5425	34.3234	31.9928	37.2906	28.1535
	362	49.9298	39.1911	40.9593	46.5279	41.7409	46.2086	48.6388	62.1793	39.8007	46.0902	43.2859	36.3287	35.1038	29.9647	34.7914	32.4707	30.7918	25.6647	27.7536	39.7649	29.8634	25.4898	31.7179	24.9014	35.2409	33.7477	29.3291	40.5192	28.5486
	364	50.8602	38.4268	39.6901	45.646	40.8438	43.4172	44.8528	54.9407	35.4728	44.7696	43.2953	42.4211	29.3126	28.8038	34.0614	35.5178	30.8564	26.4157	27.0333	42.2117	30.5626	24.3062	32.2303	25.9619	32.0616	37.662	31.0078	33.6218	24.7743
	366	49.5354	37.9733	39.9269	43.1371	42.5847	39.2218	45.4927	53.0286	37.167	40.4489	39.9556	40.0201	32.531	28.5036	32.08	32.5742	29.2479	23.154	27.1643	36.1483	31.3306	23.5077	32.1855	25.5172	31.5749	31.749	31.4958	39.488	25.6835
	368	51.7429	37.2363	38.8332	42.5565	41.262	39.1618	49.0491	57.5747	35.9086	35.4271	39.5962	33.06	32.6416	28.0296	32.7465	33.092	30.4978	23.9592	28.5274	42.3331	32.9786	24.0507	31.403	25.4783	29.2455	34.64	33.1519	39.7253	26.4143
	370	51.4192	38.5104	37.676	39.6955	41.5879	43.6418	46.3699	57.2641	38.7568	39.0571	38.7158	33.9381	35.8539	29.4363	32.2022	33.3243	29.8468	26.9836	28.9268	32.5586	29.0295	24.1656	30.1781	25.929	29.8746	33.4196	32.2794	36.1608	25.0905
	372	56.7869	38.1686	37.0862	46.5782	40.9691	38.2528	41.8371	54.8863	36.3856	41.7013	41.324	33.5029	30.9296	28.1902	33.3963	33.8061	28.4376	27.431	28.4551	37.5174	30.0794	24.6878	29.8288	25.7111	31.7636	35.2078	31.0785	40.9379	26.5635
	374	47.5491	38.4237	36.2456	43.1376	40.5437	41.5434	46.2008	59.9515	38.8591	38.6472	44.2468	36.0816	29.6327	25.3343	34.6367	33.3621	26.2783	26.4007	26.8542	37.8109	30.7267	22.7846	30.6442	25.2739	29.8033	35.3891	29.773	36.7652	24.1742
	376	51.9472	38.8956	40.831	43.5762	42.7311	41.6664	43.7782	53.9148	39.042	41.8987	39.8714	31.7927	29.491	27.4939	31.2805	31.0284	26.5858	25.9671	27.3791	36.4685	30.9711	21.462	31.3071	25.9927	32.489	32.786	33.2185	36.7952	25.1802
	378	52.827	38.2958	38.6765	46.119	39.7564	41.7167	46.6683	55.477	36.0904	40.122	40.3029	32.5016	33.0692	29.5892	35.179	31.567	26.5975	24.675	26.9969	35.7049	28.705	24.3166	30.0556	24.5808	28.5585	32.7013	29.0935	35.5849	23.8028
	380	45.8938	39.0485	34.0786	41.1294	39.627	39.2386	40.4551	49.5737	39.8044	37.1187	39.7589	36.9707	35.1114	29.6777	35.6922	35.0965	28.7826	27.1193	27.378	39.2737	31.4279	25.8922	32.8257	25.2736	30.4003	34.0925	30.3921	40.7685	23.4921
	382	49.5378	37.5683	37.3525	46.5824	41.3973	40.5972	46.2966	52.1792	35.5966	42.004	40.3763	32.655	35.5035	31.8265	33.4099	30.9788	30.2149	25.9514	26.538	38.0148	28.4251	24.1682	26.7324	26.4428	31.9313	31.8024	28.7618	35.4673	25.2185
	384	48.5817	42.4236	38.2745	47.5025	40.5824	45.9976	43.5139	56.3491	39.4552	41.3955	39.7643	38.6318	33.3938	29.8928	32.2119	33.291	27.778	27.3526	28.504	37.9752	32.8846	23.8316	29.3996	28.0999	32.0599	34.5294	29.2931	36.6023	26.5001
	386	49.4234	35.3896	37.1176	45.8882	41.2143	45.5809	47.0749	49.4339	40.6866	38.6909	38.11	32.1648	33.4007	28.0827	33.1531	31.007	28.0463	30.4392	26.7821	37.4331	29.3103	24.7669	31.4836	25.0221	29.1998	33.4404	29.6114	36.5488	23.8268
	388	48.7002	37.5398	41.1222	42.7024	38.4708	37.4873	44.9068	54.6822	36.3765	42.4384	37.7658	37.6386	34.2009	31.4451	33.2834	33.6509	27.109	27.6309	27.697	39.1387	30.1661	25.2311	30.8933	26.6929	29.4285	30.6107	30.0653	39.7301	25.8339
	390	49.5925	39.9993	39.603	46.2656	41.2222	47.1182	47.185	53.5975	37.1903	41.8186	42.2746	28.9021	31.262	24.5381	33.0989	32.0488	27.1554	25.4216	27.1507	38.4838	28.4948	22.513	29.0413	28.7557	31.5792	32.7823	29.0401	38.9198	24.656
	392	50.4879	39.2395	38.3698	44.6405	36.3729	44.2018	42.0215	56.3648	36.8895	41.2922	37.8045	34.1079	33.7675	30.1631	33.9246	32.5066	30.7374	31.963	28.2344	38.9281	30.9822	26.3023	32.0304	26.6445	34.2696	32.846	30.2758	41.2639	25.1212
	394	49.0643	42.018	38.9922	44.4008	39.3902	45.6114	43.5459	60.3731	35.2409	43.3804	38.8491	33.3943	31.7777	29.3728	30.4752	31.6431	26.7443	24.4214	25.8388	38.1742	28.1659	22.0746	28.8521	27.9973	31.7555	33.7579	29.3617	35.2947	25.305
	396	49.8391	38.695	35.7454	42.5014	40.3313	41.3137	42.2771	55.8439	36.7316	38.3947	42.1301	35.3992	33.1207	27.8471	33.2076	32.6201	26.8179	27.7153	27.8742	34.3593	31.0387	24.3446	27.2872	25.1705	29.2657	32.8569	32.7872	36.1459	25.1824
	398	51.6913	38.3408	38.873	46.5503	37.611	41.3013	45.0747	56.5383	37.6278	37.1833	38.2712	31.9698	31.7547	28.1422	32.9742	31.0361	29.904	23.2553	27.3158	37.1793	29.857	24.5165	26.157	26.5762	31.3485	35.4037	29.9107	37.4866	27.4296
	400	48.3387	38.4139	38.8386	43.1098	40.8595	39.5283	44.326	57.8501	35.8656	38.582	37.8203	36.6115	33.777	30.3135	32.1981	30.9306	27.0074	27.2649	26.9836	34.991	30.2285	24.4127	30.3618	25.5963	27.7568	34.2579	29.6646	38.6238	25.5145
	402	51.0166	36.9602	38.2809	43.9756	40.61	39.128	45.9679	55.4544	35.7633	37.5248	40.6916	34.7662	33.873	28.3209	31.4489	31.4958	27.2002	25.1981	25.9616	39.2894	29.2147	25.7888	30.2368	25.6099	30.4665	30.4595	29.5095	39.1498	23.6349
	404	47.0352	40.9818	34.9165	43.2454	37.4954	41.2581	44.0936	52.4105	38.2289	38.2921	39.0989	36.2881	33.1761	29.5415	31.7999	31.8498	27.6873	23.7139	30.2564	37.5776	29.872	25.4023	27.7154	28.1036	30.9022	30.9755	31.8974	38.0408	23.4264
	406	49.3098	36.9407	40.0998	44.3037	40.654	44.7868	45.2463	52.3142	35.1612	43.279	38.0079	32.806	32.3354	28.6806	31.3943	36.5176	25.5211	27.116	24.9451	35.6454	28.2361	24.1188	29.9748	25.2751	32.7	32.3957	30.5175	38.4462	26.8048
	408	45.6986	37.9583	39.6441	42.8916	36.1282	38.9513	42.2438	53.976	33.7082	37.4497	40.6009	32.8877	31.8061	25.7954	32.7009	31.5402	28.9585	27.5055	26.8951	38.1288	29.9844	24.3161	29.1757	25.061	33.1126	34.032	32.229	39.9901	24.3367
	410	49.0937	39.919	38.5445	44.4884	40.8422	44.0779	44.5732	55.6605	36.3972	43.8804	37.8952	30.9248	29.6889	27.7122	30.5861	32.4215	26.4864	23.4604	26.9677	32.8373	27.6905	21.9158	29.8716	24.3235	31.8281	32.2991	29.8159	42.2411	24.2749
	412	47.5419	36.6974	38.6035	41.991	42.3208	43.8071	46.2189	55.231	41.0445	39.2233	36.5422	40.0429	33.6885	26.8192	31.8555	30.2461	27.5517	24.7723	27.7699	36.5683	29.8937	25.7595	27.5148	26.5567	33.247	33.6298	30.2284	38.175	25.421
	414	47.5114	37.0014	37.7361	42.8914	40.5128	42.9846	44.0662	51.6747	39.5308	41.5431	42.0494	33.7064	35.1217	28.6641	32.8722	31.1702	28.7615	25.3926	26.7858	39.1012	33.1529	23.2109	30.4781	26.4032	32.648	32.8235	28.2984	40.3115	25.8186
	416	48.5257	36.0235	34.0887	40.7784	40.0513	39.5387	46.6138	59.4625	36.3453	37.293	39.3737	33.1463	34.2403	31.7672	32.5325	32.3965	25.5984	25.5114	27.9302	35.9867	26.7094	23.5122	33.3252	24.5529	30.908	30.5182	29.1681	37.8871	26.2668
	418	48.006	37.3404	35.7289	43.2556	42.1004	38.09	42.6155	56.2641	36.7028	40.2549	38.353	32.7836	32.7079	31.5933	31.678	30.5241	26.8857	28.8221	27.0042	37.2172	28.3295	23.1162	29.0104	24.8081	34.2404	34.3644	29.6651	43.0319	22.6726
	420	48.5804	37.8814	35.1189	41.6276	40.4026	41.9116	41.0643	49.3498	33.6236	38.9014	37.7999	28.8752	30.047	30.936	31.0878	29.9362	27.4512	23.5192	26.9267	32.877	26.9177	21.516	28.836	23.4736	32.1542	31.2321	30.7224	37.9986	23.3564
	422	45.5841	40.4913	35.644	39.3771	38.4053	39.2332	44.2114	53.4015	35.4468	39.3249	39.2615	29.0595	30.9665	28.3926	30.8956	31.931	28.3156	28.036	27.2626	30.8589	28.2967	22.965	30.8834	24.2896	32.0654	31.7492	28.981	43.2013	25.5376
	424	48.2486	36.4487	34.4776	45.5977	40.4689	38.6892	44.1675	51.6725	33.9852	43.8188	37.1051	31.717	37.0042	31.6807	30.6917	34.3097	27.2215	24.3867	27.7847	43.8874	28.7545	23.8783	34.2489	27.2478	30.2435	34.1798	27.2283	33.2675	25.7798
	426	51.8865	43.9496	40.8704	44.9567	43.592	45.9565	49.3041	55.0029	44.3712	41.5891	41.9659	33.4501	38.3541	29.1971	31.2603	34.1868	25.4805	27.0845	25.6274	32.9933	29.3538	25.1968	30.5548	25.3851	32.8814	34.2135	31.1856	42.3448	24.8878
	428	50.785	37.5551	34.4074	43.284	40.289	44.3197	39.7529	55.2732	32.7325	38.9128	38.2243	29.6088	31.9061	27.0941	36.4484	33.0152	29.7448	23.4438	27.499	40.5544	29.5714	24.1489	32.9084	26.4046	35.355	33.3447	29.6838	41.9812	25.1324
	430	48.4434	42.8971	37.0348	41.1741	40.1054	42.0807	44.1838	56.0466	35.3727	36.9766	40.1433	38.8134	32.6886	25.1554	31.6262	31.6797	27.4228	25.478	25.6855	36.6163	28.2127	23.747	31.5451	27.3244	31.9964	30.0869	29.5855	37.2855	22.7919
	432	48.1233	39.0264	37.1772	42.7965	39.2169	39.423	42.4718	52.9575	34.7223	37.8871	39.5195	34.8681	33.7406	27.7128	31.6893	30.0777	27.5978	24.2283	26.4101	35.6814	28.9788	25.5825	31.7311	27.5875	30.5685	32.6067	29.7738	38.4466	22.9605
	434	51.335	41.1441	38.4721	44.1531	38.3774	43.8399	45.4061	51.2779	34.2855	39.0143	40.7343	41.705	35.7506	25.8597	32.6888	31.0499	24.6315	27.9862	26.4307	38.4334	32.2392	26.9941	29.4976	24.9916	29.5589	35.2136	30.0477	41.8424	24.0956
	436	47.7891	38.5743	36.9439	41.8412	37.3873	47.835	44.5175	48.5634	35.9221	38.4768	36.4914	33.6532	29.8055	30.7475	33.2271	29.3215	27.3339	25.429	26.6678	39.4895	29.5962	24.5992	31.9198	26.6717	33.5715	31.451	31.1564	37.1683	24.1228
	438	50.6996	40.0335	38.6553	43.2766	38.6872	43.6513	46.6029	51.0146	38.1259	40.2979	40.3225	32.4677	35.9772	27.0552	34.4393	31.4626	28.1953	25.2398	27.4498	32.7324	29.2141	23.6793	30.0562	24.4631	29.0822	33.2589	33.2883	37.9516	25.8559
	440	49.6199	37.6064	36.6628	47.7988	39.4851	40.5007	45.036	53.7618	34.3096	41.0007	36.5294	34.4239	33.0085	28.3744	34.0153	36.1582	27.1591	22.982	27.3081	34.5079	30.9576	24.012	31.6394	27.4682	33.528	32.4173	30.3101	32.8716	25.8044
	442	49.6284	41.0734	39.1551	42.839	38.7034	43.3412	43.6286	59.4345	40.9104	40.6056	42.7859	27.5008	33.1173	28.7596	33.5172	30.8645	26.7352	25.0146	25.9993	35.768	31.9303	20.8158	32.1385	26.0001	30.8144	34.0404	31.0855	37.0236	25.4708
	444	52.9491	41.2628	37.2401	46.797	38.7338	56.8285	48.6874	58.4806	40.44	43.1624	39.0113	30.8476	30.3316	28.4394	28.5444	29.2234	26.2082	21.7298	26.7899	35.6225	28.6878	22.3592	29.2795	24.225	30.6471	32.0205	28.9553	37.5285	22.2316
	446	56.1588	41.6468	37.7218	53.5824	41.3277	56.1265	50.7657	56.3891	46.9197	43.6026	42.9405	29.9389	36.5507	27.3307	32.0226	30.951	27.3741	24.4672	27.0845	35.7279	28.5586	21.9688	27.533	25.3369	33.2382	30.3889	28.6082	37.5189	26.3102
	448	58.0197	49.4726	41.0441	63.1925	42.0066	61.716	51.7658	66.8267	48.355	47.3099	46.3092	34.427	31.7798	29.1827	32.3302	29.5586	27.8499	24.1547	28.5936	36.8487	27.7721	23.765	26.487	26.2801	30.6544	30.4022	31.4035	38.404	24.995
	450	67.2602	52.8765	41.4218	77.784	46.7781	71.4115	61.0183	66.9855	49.4346	54.1378	47.0588	33.7727	31.6192	26.9004	29.37	31.0933	25.8872	24.8328	26.6255	39.6977	29.3577	24.0759	29.3997	23.922	30.7971	32.7768	29.8388	36.9369	22.7354
	452	73.7228	55.8838	45.4072	78.5342	43.8949	74.0039	62.9705	61.3677	48.4628	51.847	50.6639	32.2124	30.2227	29.0065	35.0067	35.6494	28.6154	24.6972	28.1537	33.4763	28.126	22.9035	26.8849	27.8627	31.5321	30.4584	30.1356	42.4992	25.048
	454	75.5983	52.4925	44.7921	84.7356	50.1778	68.155	64.1473	66.1493	50.9885	54.2725	51.802	31.8064	32.706	29.5298	31.012	33.8864	26.4117	23.6864	26.5645	33.5999	30.0453	25.7966	29.9046	25.8351	28.9327	30.9081	30.1004	40.0724	24.3676
	456	79.8547	55.5138	46.6784	83.3928	48.4795	67.2399	66.7827	66.9639	51.6842	63.2171	54.4871	32.2116	34.1852	27.4167	33.4305	30.468	26.5199	25.2427	26.5043	37.4845	29.1215	22.8824	32.0704	27.9183	34.4468	33.9107	30.1577	39.5216	24.0914
	458	88.3364	57.4731	52.816	80.3587	46.6518	72.9521	76.9607	65.1299	58.8462	64.9202	51.0624	34.4912	33.6174	26.198	33.6007	33.9336	27.808	23.3716	28.4655	41.3349	30.5253	23.4677	30.2938	26.7682	35.1835	33.6064	28.889	39.1112	24.5763
	460	93.7882	56.8716	50.2659	93.2497	53.3594	81.6767	74.0858	76.7992	56.0008	72.1771	50.2531	35.0891	34.171	25.4259	31.2175	28.8829	29.3559	26.0079	27.495	36.0841	28.2137	23.4707	28.1234	27.1202	31.9526	35.015	31.5377	39.384	23.071
	462	96.3814	54.8042	54.911	88.3181	55.7268	96.8781	77.1183	77.1286	61.442	67.3544	57.4916	28.881	30.157	28.1768	30.7056	30.669	25.7236	20.5328	26.2143	36.1183	28.1024	22.3073	28.9243	25.7891	31.897	31.7161	29.7407	34.9209	24.4879
	464	100.604	66.468	54.6838	89.6246	55.003	95.438	78.4851	76.1658	63.4291	67.7413	53.4746	33.377	31.3831	29.8926	32.7972	31.7736	25.7364	28.0663	26.4673	32.1779	26.6122	20.2619	28.8844	24.6541	33.702	32.1467	29.5281	35.7313	25.2762
	466	103.654	62.5608	53.2354	92.7206	55.6813	97.4108	80.5341	79.1322	62.9908	67.8721	58.8257	27.3447	31.6772	27.6132	31.3319	30.6664	24.6334	26.6309	25.7269	32.3008	28.0979	23.4448	31.4141	26.6794	30.6465	30.9429	29.8005	36.874	23.2462
	468	113.147	70.8414	54.2425	97.254	59.8699	89.5305	88.6757	66.6864	69.898	68.4229	61.7145	34.1672	28.3364	28.2384	33.2447	31.4786	24.9096	29.3467	26.2535	34.8262	31.746	25.4862	29.0958	27.8211	31.5175	29.8881	30.3987	39.2729	23.5501
	470	117.041	69.925	54.2552	100.236	59.405	100.915	89.6217	65.6999	70.362	63.527	58.491	33.3378	32.4242	28.7151	32.8404	27.2064	26.6206	28.3071	26.893	29.5823	29.543	25.4416	30.5419	24.5707	30.5757	33.41	28.6028	34.9695	24.5154
	472	119.319	74.7325	61.4529	97.6057	61.8714	115.807	92.0515	75.6207	66.4966	79.8478	66.1247	34.4125	30.8642	27.3084	34.0415	26.1606	27.6449	26.7546	28.7274	41.8654	27.9648	22.966	26.3889	27.5281	31.7721	32.5858	32.1505	34.0784	23.9646
	474	132.448	78.4876	61.0909	105.369	61.9763	100.057	94.0722	86.3784	68.8966	79.6773	66.1191	33.4126	31.629	27.2769	29.8348	31.9066	28.7164	25.2088	26.8512	36.6151	29.7675	24.8164	28.9873	25.6525	28.7143	33.9378	28.3953	38.0584	22.5229
	476	134.881	78.8644	67.2874	98.8481	62.3056	97.8625	93.1857	82.7304	73.2387	79.6904	68.2153	32.9795	31.9403	27.915	32.1395	26.8132	29.8176	26.0382	24.4387	36.4887	31.2305	23.293	28.7272	26.3778	29.8198	30.1738	29.3394	37.1223	24.2919
	478	141.856	86.476	57.1475	107.633	61.6895	107.123	96.7251	73.5465	72.1371	76.6261	65.0454	29.1475	32.8355	27.3269	31.4949	29.0921	27.9265	24.6046	28.1911	36.9305	27.8954	22.8354	29.23	25.3733	33.4394	32.1212	30.711	38.1719	24.7465
	480	134.224	78.9471	63.9071	105.782	66.5159	105.748	99.9792	89.4704	69.139	75.3444	69.1315	32.329	32.2355	28.4173	32.8594	31.3627	26.8325	25.1698	28.456	40.0663	28.2971	22.2427	30.2316	25.1995	29.2036	30.1732	28.9321	35.1318	22.8477
	482	145.166	83.5827	58.3236	107.153	64.556	107.098	106.302	85.9013	70.5868	77.0589	68.7049	32.264	33.1146	27.4405	30.4414	33.1571	25.9776	23.5651	27.6461	34.9931	27.6593	22.6204	31.356	25.4577	34.0855	32.0325	29.8833	38.3237	24.0172
	484	145.665	84.4336	60.998	110.833	61.4655	103.043	110.562	96.2271	74.3799	74.6842	70.0637	32.7303	32.6919	30.4838	31.7273	30.1082	25.2348	25.78	26.1032	32.7764	27.2693	23.6677	26.6653	23.1783	29.9487	32.4574	31.595	36.9792	25.6364
	486	152.243	84.4894	59.3332	113.842	65.522	113.53	111.584	85.5667	70.6946	74.5176	74.5365	29.1775	31.3191	31.8718	33.0513	30.3938	27.7325	25.992	26.5931	35.4514	27.4329	25.6112	27.3007	26.9303	34.2624	32.5624	28.5481	34.155	24.3118
	488	149.713	88.3174	64.0462	109.761	66.7273	115.782	119.678	81.6092	72.249	79.5755	71.8895	32.992	35.8882	26.2135	34.5163	30.5717	27.9673	25.6356	25.4378	33.3622	26.2452	23.2749	33.6295	26.4808	30.4032	30.9386	27.9132	33.5143	23.3529
	490	161.071	86.0539	65.3928	115.694	66.3015	116.969	108.538	93.2052	82.7402	80.9325	81.8248	33.1995	32.2243	27.1646	31.9976	28.6149	26.6859	23.6943	26.0215	41.9901	26.3038	25.0006	28.434	25.48	31.3298	31.4022	28.8471	35.8232	22.8714
	492	148.567	84.151	66.6512	109.147	66.5235	125.901	119.797	89.8318	74.0003	78.2296	82.349	28.6445	34.0174	27.5765	30.6821	29.988	27.9402	25.5889	25.5798	33.7703	28.7447	24.2741	28.0639	25.2084	33.9441	32.169	30.4447	35.4694	23.4144
	494	151.111	91.2258	65.3618	116.836	69.9716	117.145	114.215	78.5702	78.6513	75.0515	71.0596	31.8572	31.6036	26.8876	30.6355	30.4025	25.7153	24.4037	25.0216	34.1928	25.9957	23.196	28.256	23.2555	29.0793	32.3809	28.2782	32.1213	23.3539
	496	153.869	96.9875	70.5901	115.538	71.6585	122.644	127.975	106.103	87.8078	81.8474	77.576	29.3313	32.4496	27.1212	32.3766	30.262	27.5276	22.569	25.833	34.6329	27.3367	25.3821	32.2782	25.3261	35.3516	32.4781	28.0701	41.6006	24.6691
	498	170.834	92.0329	59.4074	110.426	65.0189	124.211	120.455	83.247	81.1445	77.5411	78.1026	30.7719	30.2488	27.4884	30.7262	29.3572	25.0876	23.4172	28.6116	38.0907	25.7971	20.7271	26.9756	25.7764	28.9658	31.1477	29.7841	34.9813	23.2299
	500	151.898	95.563	69.4284	115.407	73.2105	106.73	126.321	96.2246	86.5528	85.1805	78.3791	34.096	34.998	28.6931	30.5405	31.0963	28.1012	27.8296	25.4134	35.6166	28.186	23.9115	28.9229	26.9386	32.3623	33.4946	29.3679	40.1702	23.268
	502	164.975	101.892	62.8975	110.751	63.0132	129.38	123.286	84.8134	89.0491	85.7283	82.898	30.1205	36.502	25.5254	31.8422	29.442	24.431	25.0832	26.8302	31.2286	25.598	22.434	31.1779	25.3564	28.8506	29.8328	26.392	32.6411	22.3686
	504	163.219	98.1391	63.3186	110.279	69.4613	122.129	122.555	91.1335	90.5464	84.4614	79.4079	34.2034	30.894	28.8481	32.9268	31.8022	27.8439	24.6807	27.6841	31.9455	27.9067	23.6291	29.2467	25.1381	34.0527	33.561	30.6659	41.0064	24.4109
	506	170.193	94.9671	60.8193	114.182	69.9822	115.362	128.89	93.9541	92.927	81.7801	84.3475	32.3908	30.0966	26.7192	32.6494	31.9427	28.7097	24.7874	25.7469	35.4455	28.7052	23.3981	26.6217	22.9658	28.0104	31.3087	28.351	37.1171	24.3373
	508	171.849	98.385	68.1484	117.268	72.1793	106.938	128.953	94.5843	91.6715	87.6362	71.5811	33.6015	32.6025	28.3379	33.2704	30.1467	30.1885	31.7219	26.6556	36.1144	30.9178	23.4092	29.3979	24.574	32.6375	33.6969	32.0027	39.0162	23.9367
	510	161.245	94.65	67.4768	114.939	72.3519	121.121	127.155	90.4818	88.8562	77.3596	78.3537	35.0393	29.7176	26.9172	30.4373	29.6393	25.2164	24.8362	26.6111	33.9742	26.6453	21.2826	26.0108	22.6656	34.8008	29.7412	30.5794	36.9079	23.2307
	512	162.153	96.3163	65.8518	123.255	72.3932	121.321	132.384	92.8827	96.8905	82.6461	82.9005	29.1294	32.6881	29.9381	31.749	32.1968	27.5829	23.7246	25.8013	32.388	29.6485	23.0628	26.7068	25.3666	32.112	30.9167	29.267	35.9138	23.1011
	514	162.425	99.4582	64.4266	124.546	72.3085	117.118	136.321	92.4506	96.0627	82.4714	75.5021	33.2082	30.4441	25.4885	30.2011	32.309	24.2731	20.1924	23.2308	34.3692	26.4203	22.4068	26.2958	25.7407	30.4527	30.8567	26.4518	39.5578	24.4026
	516	172.76	94.3814	64.6161	121.117	73.4722	125.104	146.826	84.6185	103.604	82.4065	82.5416	30.1418	33.6015	27.3636	33.2566	32.3066	28.0454	25.4434	26.1773	39.1999	24.2578	20.955	31.1275	26.6972	32.0052	28.7811	32.2007	36.4939	22.6722
	518	163.105	87.5509	60.5479	114.237	78.875	113.529	133.125	86.0936	81.1775	81.316	74.7737	32.806	34.2777	29.979	30.8955	29.059	28.3871	26.6205	25.6091	37.7811	26.3465	21.1571	29.8853	27.05	28.5201	31.1664	30.2858	35.4168	24.2511
	520	171.36	94.5611	75.3997	117.91	72.1684	122.014	145.834	103.721	89.4721	85.7827	80.2045	32.9168	34.5883	26.4999	31.7355	28.3567	24.6939	25.9567	24.2823	32.7324	27.5469	22.9943	27.8864	27.3106	31.3053	32.1371	29.4964	37.3408	23.7101
	522	164.148	95.7844	67.5752	116.472	69.8484	119.655	137.993	90.5199	93.9739	88.566	89.8258	30.9933	28.8846	29.3511	31.5722	28.3092	24.1666	25.681	25.0425	31.9642	27.8851	18.4453	28.5158	23.1441	27.967	31.6497	26.1795	34.7921	20.4995
	524	162.578	93.8386	70.7757	115.664	74.257	108.118	140.443	93.5182	86.5494	82.1637	85.1063	31.2919	32.5691	28.0503	30.4211	30.1975	27.2105	23.2555	24.7138	41.3566	26.9564	19.6286	30.9099	26.4695	28.3172	29.68	30.7241	33.3886	22.1541
	526	177.729	97.2906	71.281	117.086	74.2179	123.612	144.215	91.7813	94.2299	81.9859	88.5858	33.0715	30.3396	29.6107	31.1673	29.6745	26.0104	22.4837	27.1802	35.8489	26.1739	22.4899	26.193	23.2265	31.45	30.0604	28.6494	39.0761	22.6941
	528	168.423	91.7923	65.1714	115.998	75.2428	122.973	139.764	100.447	81.8267	82.5712	82.3516	30.1337	33.6865	24.6245	30.6783	31.5183	25.6572	24.4959	26.1555	42.582	24.5312	22.635	28.6513	25.1326	30.0206	29.7932	25.2076	35.5557	23.3546
	530	166.98	90.3996	65.2604	114.371	77.3358	125.078	148.384	90.8985	89.0277	77.9767	84.5184	29.8202	29.5728	25.6161	33.3935	27.1474	25.9271	27.2842	24.7356	38.2512	27.3822	21.3237	25.9763	24.6769	29.6987	31.8696	30.3583	35.2623	23.7417
	532	169.718	98.8071	62.3702	113.146	70.4453	120.011	140.458	96.8476	89.0456	84.7844	82.8771	30.9994	28.4894	26.2085	31.972	29.4339	26.1512	29.809	25.4803	32.8598	25.9532	22.4122	27.6772	24.141	29.7751	32.8954	29.5432	39.6582	24.1044
	534	166.945	97.1564	70.3158	113.516	77.754	122.681	147.712	87.0684	92.9979	88.3899	88.3236	27.1605	33.3104	25.1346	30.3363	30.9754	25.9456	25.8272	24.8567	33.4421	25.2394	21.0151	26.5877	22.1949	29.0067	30.8413	26.0358	35.0138	24.6836
	536	169.019	96.8778	70.0721	123.635	74.4282	123.569	141.634	97.8329	92.3896	89.4202	87.8223	28.2039	31.2971	26.6001	32.76	30.1805	26.5868	23.3962	25.3081	33.4898	25.6089	21.4419	26.8691	26.0819	30.3563	31.3324	27.4823	37.0581	21.6117
	538	166.698	92.069	71.8391	118.17	69.7014	109.381	147.63	88.5529	84.2477	91.0231	82.713	29.6095	30.7361	25.0105	30.3146	29.5868	29.0116	22.5635	24.4298	36.0551	23.5044	22.7056	27.0906	24.3735	31.864	31.2761	28.6931	32.3233	20.7594
	540	182.784	93.0882	70.7902	111.425	72.0606	104.167	131.152	85.1179	85.8886	88.1624	86.7504	29.6086	32.9461	25.0839	30.9884	28.4651	26.6402	26.6393	26.388	32.0663	26.5996	24.8172	28.4563	23.1747	29.9069	33.4711	28.2665	40.6091	23.4183
	542	173.517	93.4202	65.1496	121.884	72.5643	120.989	138.501	95.6215	86.9503	88.2327	81.4567	23.4453	32.9161	23.2674	29.6147	26.5633	27.8302	23.1566	25.0085	34.2832	26.2117	19.9326	27.3269	24.5729	26.9878	32.1417	29.0557	38.5043	22.6443
	544	161.529	98.5496	69.4245	119.998	69.2805	120.125	136.719	105.889	79.3301	82.8615	83.9263	31.4878	36.5514	24.702	31.0706	30.7981	25.9408	25.4762	25.6003	35.1335	27.2856	23.4962	27.7134	27.1681	29.6886	32.1914	28.4109	35.6279	25.1398
	546	169.327	89.4053	72.8344	110.645	75.9547	111.652	143.766	100.201	95.3348	78.3963	83.075	29.0485	28.466	24.3996	30.085	26.0296	28.2501	24.9929	25.3474	35.2143	26.9542	20.5126	23.7623	24.1554	27.6606	30.6926	28.7375	34.1984	21.9161
	548	162.053	94.3697	71.8849	115.975	69.4347	110.007	137.008	89.7871	89.3163	78.1242	80.1988	31.4278	32.6385	24.8967	31.792	30.3394	27.9121	26.2391	26.3997	37.8111	23.4115	21.7647	29.4357	27.3353	31.5235	32.3316	28.6136	37.5493	24.3984
	550	175.425	96.3543	63.9605	116.214	75.9163	114.049	141.783	93.9234	83.495	89.128	87.9	30.0963	29.5073	25.9073	29.9326	28.9845	26.2225	23.0173	23.5317	32.7572	25.3589	21.547	27.7531	23.9924	31.2316	32.3168	26.675	37.8582	21.2613
	552	170.859	93.2032	67.932	105.007	78.5902	105.309	146.03	95.634	84.9269	82.5578	89.9323	31.0191	30.8324	23.6676	30.4596	28.6964	24.0036	21.0751	24.8507	34.7314	24.7418	22.6721	27.1665	23.3112	29.138	30.9722	29.1173	41.1663	23.0283
	554	148.153	90.7758	66.068	102.555	69.5327	119.357	124.439	92.7836	86.1005	77.442	85.2649	26.594	30.7775	23.7358	29.4464	28.2099	23.5863	23.6836	23.6379	35.4078	28.3542	21.0078	28.6507	21.9615	29.2064	29.2935	25.781	37.9831	21.9069
	556	165.345	87.909	65.4507	115.696	72.7198	109.853	135.86	97.5186	83.8888	82.443	77.1533	28.1468	34.59	25.4915	29.2368	29.8612	26.4142	27.9968	26.6388	39.1226	25.2339	22.8433	27.1056	22.1094	32.7045	29.0746	29.8674	28.5446	22
	558	158.61	86.7425	68.5437	112.495	69.3195	100.965	131.374	89.4822	82.5718	86.1764	83.6107	28.2169	31.9711	25.1867	29.447	29.3209	28.2634	22.2137	25.5371	34.2161	22.2498	22.041	26.233	25.0148	31.2697	30.5533	30.0217	31.8928	21.7613
	560	169.388	86.2096	59.6082	118.288	74.4569	109.59	135.686	91.3262	86.578	84.005	83.854	28.8431	32.9649	25.4337	30.5514	28.9824	24.8224	23.9925	25.4936	35.0487	26.0433	23.8555	29.9855	25.0364	35.196	30.0356	29.0562	35.6565	22.3086
	562	165.798	89.9953	66.2741	120.767	71.635	104.468	126.087	93.4649	77.8898	81.7099	85.4922	30.1705	31.5405	27.0728	30.7597	28.4341	23.9298	22.0591	25.5249	35.8255	25.5496	21.8609	27.056	27.4904	28.5209	32.1719	29.33	34.2592	22.7613
	564	157.876	84.2839	62.7645	117.977	73.494	110.06	142.655	92.3615	83.589	85.3308	83.353	31.007	31.9997	27.9545	31.1999	30.5901	25.8807	25.2656	27.3883	36.4117	27.1421	23.5743	28.0721	27.018	29.6451	30.7884	27.1333	32.6363	22.5602
	566	156.055	84.819	66.1309	122.468	70.8038	113.757	127.575	96.1721	78.8184	80.4776	80.9304	27.2061	30.584	27.3975	29.3567	26.9856	25.5618	24.3339	24.661	31.6793	25.0133	20.5451	29.3663	24.868	30.582	29.7809	29.392	35.9195	22.8393
	568	146.373	87.3479	65.5312	113.146	69.0735	103.934	133.321	88.6964	88.5479	85.4287	76.7407	31.7642	29.2201	23.9676	32.2538	29.5879	25.1072	23.1458	25.9186	32.5953	26.1783	21.5254	26.583	24.7099	29.6992	32.7678	28.3761	38.8137	22.2522
	570	154.771	87.2724	68.4011	110.849	68.5628	111.843	136.869	105.689	81.0564	87.4327	94.6709	33.8903	29.6333	22.5282	29.4236	30.0762	26.1579	23.8862	24.5761	36.9644	22.3554	22.4587	28.5671	26.9147	29.977	31.7231	28.4112	34.743	22.123
	572	146.174	88.8884	61.983	109.13	65.4749	96.9024	116.542	88.0981	83.2862	83.4547	87.1619	30.9643	30.0722	24.05	31.6531	27.8486	25.2273	24.4402	24.5826	31.1505	23.4243	25.69	28.4548	24.6379	27.6375	29.2319	28.596	33.0332	21.5608
	574	151.807	82.5917	63.772	113.963	70.6037	108.479	131.011	88.2418	86.4441	82.5339	91.0923	30.0839	28.9955	25.7347	29.9095	27.823	27.7721	25.3144	25.8843	32.5362	26.5737	21.3813	25.2927	24.045	28.6697	29.6348	28.3174	34.6697	23.4494
	576	158.113	85.6254	68.3106	112.008	63.5314	120.736	127.593	75.9663	78.885	85.4665	83.4635	29.4468	33.1429	25.0295	29.2741	29.4422	28.21	26.0303	25.9185	36.0646	24.2578	23.7478	30.5846	28.322	28.0066	31.9794	29.1734	35.4482	22.7859
	578	149.257	85.7059	64.5621	109.628	69.5287	103.947	123.438	99.0147	73.0737	79.475	87.6252	29.6604	29.0113	21.5428	29.7772	27.0012	26.725	25.315	24.5781	40.1826	25.4436	20.9171	28.6366	26.8099	29.4004	30.6896	27.4155	35.151	23.115
	580	149.92	83.0088	66.3924	112.516	67.6437	101.089	126.988	87.3211	78.8579	74.8882	82.5184	27.3417	28.6893	26.4757	30.7172	31.142	26.1543	21.6522	25.5958	35.2262	25.1975	24.1699	27.0282	25.4378	29.4153	29.4541	29.2255	32.1975	21.2381
	582	150.771	88.0126	62.8113	111.746	68.5956	114.831	118.629	99.0607	82.2764	82.4151	81.3678	27.6987	32.7522	28.4445	28.6793	29.248	26.9322	24.2202	25.3103	35.7278	25.3608	22.6623	29.0174	25.0217	34.6598	29.976	29.0699	33.9866	21.9406
	584	158.301	79.4776	62.649	113.167	66.8391	100.725	118.973	83.2472	79.9213	76.7243	86.9291	30.1905	28.1882	25.3547	30.377	31.1224	25.8863	23.5961	23.1475	37.6699	24.1673	23.9601	29.4141	26.7221	27.4665	33.4359	32.5516	32.7931	22.9019
	586	156.436	81.5156	61.1411	108.876	67.3104	95.6889	120.028	94.8583	83.5611	79.2043	81.9144	31.6734	31.8142	25.6086	30.8213	27.1742	25.8883	22.0169	25.4901	34.8697	24.8975	21.2915	28.8007	22.8183	30.1066	29.6628	27.029	32.3647	21.6077
	588	144.593	72.8945	59.328	106.177	63.264	92.1685	129.237	85.2181	77.3127	71.8227	79.8704	33.6311	31.6584	27.4821	31.7315	28.0849	27.2482	25.8544	25.3707	39.3819	25.1455	22.8093	28.9178	26.0856	33.0205	30.2541	28.847	37.3586	21.4547
	590	141.766	79.9592	66.0476	109.36	67.0042	102.206	116.335	92.7289	82.8434	77.6065	77.2398	28.2495	31.7345	25.9573	30.4175	27.2861	25.2058	22.1841	25.7817	37.8224	24.4046	22.06	27.6834	27.0795	31.6449	31	27.9034	29.6707	22.7726
	592	137.989	75.2616	64.5055	100.147	66.0657	98.7562	111.654	80.4885	77.9243	70.2826	75.8256	28.4682	32.0452	25.4799	31.3393	28.3518	26.7928	24.5707	24.741	38.4686	23.2048	24.0234	31.2452	24.2124	30.3341	33.1741	27.8185	37.1021	22.9246
	594	147.889	76.8631	62.1791	103.475	64.1104	106.356	119.522	80.263	80.0865	81.6904	85.2616	26.8663	30.8913	27.6895	29.8003	29.161	26.5912	21.3515	23.1605	31.622	22.7812	20.9023	26.6706	24.9993	28.657	28.5127	25.5612	30.7827	22.9661
	596	140.677	79.7679	62.1309	109.48	64.3483	116.687	119.404	86.0202	75.441	76.4238	75.9102	26.1029	31.9235	25.3221	33.0376	29.5025	25.5309	23.8853	25.0719	31.7875	23.7079	24.7046	27.9754	24.8385	29.8565	31.3777	26.7211	38.1169	22.525
	598	135.726	76.6048	65.1622	102.283	61.1708	99.5925	114.532	82.7511	76.0405	74.5827	79.1913	30.1379	26.7688	25.1718	32.281	27.1635	26.407	21.7359	23.4264	32.8588	24.3264	21.2883	27.4157	26.6606	27.0856	27.9752	27.174	34.4686	20.1836
	600	135.783	82.412	55.1907	102.289	64.7492	88.8702	109.803	84.1167	71.1545	73.272	82.0136	26.1123	29.6024	29.5443	30.691	30.333	28.0754	22.8953	26.7478	39.5227	26.3139	24.4376	25.3584	28.942	30.1157	34.0872	28.7679	35.5226	22.3966
	602	131.446	76.4434	67.1072	114.192	68.0464	106.448	120.615	88.0477	70.5674	81.9156	77.7193	31.1713	28.7437	27.2024	30.1191	30.5772	27.1257	25.9836	26.5638	36.024	25.1916	22.7406	27.1319	25.9754	29.8465	29.1099	30.008	32.6981	22.7599
	604	143.653	75.2859	61.5468	100.27	62.8508	101.334	110.957	78.3572	76.2918	72.6545	79.6374	30.5534	31.2891	24.5871	30.429	30.0408	28.4894	23.725	25.6906	34.7373	22.1977	23.8914	27.0037	23.8963	30.1935	32.5634	30.3628	34.5639	22.5954
	606	135.973	81.9756	61.8811	94.6421	63.1838	100.555	118.692	76.2192	72.0071	74.9921	77.1211	29.8092	24.1859	25.9038	28.3399	27.4218	25.7001	22.5344	23.0338	37.0776	25.1747	20.9191	29.0742	23.8975	26.7777	29.2352	27.6544	33.0749	21.2969
	608	122.056	75.2089	61.0829	98.4413	66.3873	93.3139	104.892	75.9572	69.4724	76.0401	75.0559	27.0123	29.5598	27.0824	33.1074	28.3283	26.6875	23.8037	25.3706	32.389	25.3627	23.0539	28.9585	26.9257	31.9235	33.6756	27.2716	39.8964	21.2336
	610	124.579	71.3429	63.9261	100.156	59.9895	96.676	106.407	70.3585	66.9155	74.7402	77.7726	29.8692	27.5405	24.731	30.831	30.4111	25.9316	24.3222	25.1127	30.3186	22.4941	21.9455	30.5126	24.4609	28.0721	31.7986	25.7891	31.9686	23.8596
	612	119.478	75.8045	61.6223	99.46	59.404	100.43	116.242	72.7727	65.1983	77.2017	68.7099	32.5288	29.3141	23.449	32.2294	30.7109	26.9216	21.6386	26.792	36.6766	25.3804	25.2411	27.3421	26.0097	30.9025	30.4154	25.1831	35.5444	23.1663
	614	118.072	73.7171	56.5462	107.145	66.2244	97.9661	106.373	81.721	74.5191	66.6329	72.0237	27.4059	27.5315	26.9188	29.9808	26.8713	25.3805	23.0088	24.4333	36.1534	23.8027	19.975	26.0781	26.3734	28.5794	27.6764	28.3116	32.1153	20.9788
	616	121.631	70.7269	56.5012	97.2534	58.7382	96.6326	110.487	82.3265	72.0888	67.6983	71.4658	27.5792	28.0606	26.9118	31.7293	28.6102	27.2794	27.3709	24.2654	36.4406	23.5569	21.7693	28.1802	28.885	32.5313	32.1705	29.1656	32.3207	21.6964
	618	121.426	74.4317	59.1026	95.807	60.3585	103.069	103.373	78.4776	66.0249	68.8768	82.5014	29.5315	25.7518	24.2454	29.1455	30.5046	25.4408	23.221	24.4429	35.0666	24.3082	20.9626	29.5888	23.5331	29.9816	30.5513	26.4638	33.4438	23.2263
	620	116.709	69.6477	62.5247	95.9698	65.9849	94.7373	108.006	87.422	61.9797	69.689	77.0328	31.0321	30.4825	25.6547	28.4198	30.5484	25.0737	24.215	23.8462	36.6645	25.2999	22.4752	29.662	24.241	31.6534	28.5912	26.4507	36.3929	20.9234
	622	121.298	73.3869	60.4962	95.2643	58.0362	108.211	110.695	78.1951	69.8959	69.1474	77.9998	29.0339	30.3252	25.5549	31.0519	28.6662	25.1843	22.3701	25.045	35.4349	24.3085	21.4173	27.2961	24.7275	30.8042	32.6279	26.5211	33.993	22.2745
	624	112.201	72.6773	61.8843	89.1613	57.21	89.2997	111.279	75.6589	65.6241	66.39	72.603	25.0316	31.0353	24.8741	31.96	31.3104	25.0859	26.5477	24.323	33.6085	24.8033	23.7206	29.7587	22.994	30.1828	32.9643	24.6522	33.4004	23.4976
	626	111.949	78.3578	57.4604	89.0606	61.0376	104.396	108.508	84.5065	68.6097	71.4625	67.9643	26.974	28.4658	24.274	29.3193	26.9239	23.8516	27.9585	22.2853	37.9011	22.4505	21.9101	28.0691	24.1188	26.0982	32.2334	27.0138	37.9703	20.804
	628	111.934	71.2431	58.3012	100.457	60.098	87.8431	100.636	76.7153	65.8905	73.4133	78.4481	28.157	35.1238	28.3979	33.6796	30.7176	26.1229	26.0708	27.9288	39.9118	26.9335	25.0352	26.0306	26.8623	28.8433	32.2982	28.7518	36.8026	23.5806
	630	104.004	62.9661	55.2833	94.7263	58.7768	96.998	95.3686	73.4906	68.0334	66.3706	73.0269	26.7403	27.788	25.8032	31.0349	30.0223	27.4805	24.3115	26.0577	43.5007	23.0713	19.9754	27.6191	28.2605	32.1186	31.7994	28.3909	32.7981	22.5182
	632	109.74	61.9838	58.1612	92.8909	61.9218	100.195	88.2559	76.5361	67.2444	66.9996	67.569	30.8815	31.86	25.7704	32.4623	30.4354	25.2969	24.0482	26.9549	47.3088	25.0071	22.997	29.5893	25.6668	32.391	32.335	28.0596	37.1614	24.3835
	634	107.474	66.3201	56.1128	99.2163	52.6509	95.2699	94.4687	72.543	67.1036	69.4279	64.7724	33.5203	31.1065	28.8122	33.9816	33.8799	27.1898	28.472	26.7282	55.122	23.8773	22.9252	30.0057	26.8041	35.3165	33.4374	30.443	41.5992	24.1663
	636	110.67	73.1945	57.3041	93.5918	55.8567	94.7709	94.2319	74.841	66.4727	68.5068	66.6394	37.5567	34.1073	29.1123	35.1644	31.679	30.7263	28.5932	29.1632	55.5801	27.8817	28.0933	30.9042	27.7275	31.1357	34.3004	32.3771	41.7612	25.3135

## Sheet: Panel N
WT	24.1909	24.1909	24.8855	25.9644	26.2776	25.9438	25.3561	24.5643	24.6857	24.4801	25.4642	25.5969	25.4994	25.1894	24.331	25.5403	25.8682	25.5868	25.543	25.7834	26.6218	27.164	26.1385	26.5756	26.7971	35.2333	35.2051	37.9866	39.3216	39.8742	42.27	44.0651	45.7647	45.2587	45.1595	46.2469	47.678	49.84	52.0363	51.7546	54.4163	56.7053	58.585	57.8002	57.3222	57.3395	57.9211	58.4024	59.8874
	36.4691	36.4691	37.6947	38.382	39.381	39.1456	39.0721	38.836	39.4877	39.5958	41.0524	42.2049	43.573	44.7562	45.835	46.7045	46.9881	46.1459	45.8875	45.748	46.1611	46.2679	45.6062	46.912	47.5418	76.4779	143.132	183.733	207.798	219.54	223.78	229.882	235.544	226.901	216.823	210.381	204.631	197.67	190.869	183.729	181.704	177.343	179.034	172.947	166.718	168.623	163.264	157.729	153.892
	28.5311	28.5311	29.2048	30.0704	30.7059	30.2585	29.9931	29.4793	29.7781	29.7545	30.5812	30.8255	31.3787	31.121	29.9297	30.9355	31.5363	31.511	31.8917	32.2097	32.7827	33.1432	31.9611	32.6116	33.128	46.2458	46.5298	47.8179	49.0808	49.0791	50.3476	51.2311	51.6606	52.1918	50.1721	50.6326	51.7111	53.9065	54.6438	56.4722	57.8464	58.4904	58.4473	60.2126	58.3868	58.073	58.1688	60.2354	61.8126
	24.552	24.552	25.1524	25.6195	25.7807	25.575	24.9103	24.146	23.7668	23.49	24.0642	24.7186	24.4505	24.2251	22.9983	23.8631	24.2156	23.1809	22.7299	22.2936	23.4222	23.6307	22.2571	22.8951	23.1838	23.0331	22.6776	23.3979	23.1598	22.5541	22.1152	23.2366	23.807	23.1753	22.6903	23.1915	23.2063	24.0394	24.0839	22.6895	23.3139	23.8579	23.6381	22.7026	22.0399	22.6703	23.4265	23.802	24.1363
	20.8189	20.8189	21.3977	21.7326	21.8825	22.2829	22.2492	21.598	22.0823	21.9552	23.0131	23.5801	23.2621	23.2249	22.6156	23.8528	24.3255	24.1039	23.6858	23.9097	24.605	25.0681	23.946	24.9743	25.2385	28.273	29.6263	32.9726	34.581	37.2038	38.4867	40.7934	42.0306	42.6405	43.1568	42.8291	43.3651	46.344	48.4126	49.2335	49.9905	53.8042	60.2916	62.065	58.6816	59.1383	61.653	61.9367	60.5752
	25.3102	25.3102	25.959	26.8122	27.1976	27.0824	26.7248	26.1877	26.521	26.8081	27.8262	28.5387	28.5294	28.4349	27.5272	28.7135	29.9878	29.2167	29.1067	29.4475	30.063	30.5778	29.428	30.3958	31.3447	45.4388	47.6352	54.4607	60.4264	65.0802	71.6479	80.5073	89.7587	89.9064	90.1583	91.5526	92.0403	91.1643	94.991	91.031	93.8759	94.406	93.5133	91.3386	90.0468	91.1182	91.3825	88.0628	88.0175
	31.06	31.06	31.8508	31.9311	32.2543	32.0062	32.2352	31.6327	31.7687	31.3553	32.2243	33.0275	33.1964	32.8814	32.2969	33.4454	34.1023	33.9113	33.5798	33.6528	35.0432	35.3959	35.3364	36.3685	37.9353	42.1571	47.0847	56.3231	60.0262	62.5428	63.3303	64.3169	64.5086	64.255	63.1934	63.2084	62.5346	62.9304	63.9249	61.777	62.9142	62.8755	63.1082	61.5325	60.0763	61.3643	60.9571	61.5574	61.5411
	27.6076	27.6076	28.9056	29.5649	30.3666	29.8358	30.2793	29.9384	30.4639	30.0872	30.9191	31.6828	32.3563	31.5745	31.0734	32.6026	33.0686	32.975	32.4836	32.4541	33.7109	34.2912	33.5915	34.451	35.0949	41.5066	51.1952	74.2264	87.3123	105.876	111.182	116.243	113.29	117.722	110.835	112.56	104.248	99.4724	104.686	96.2744	100.948	98.2254	103.799	99.2433	97.5062	96.6745	91.9248	88.9954	88.4399
	26.3385	26.3385	27.2269	27.8204	28.5376	27.9918	27.5412	27.1829	27.8619	27.5072	28.5492	28.8784	29.2806	29.3828	28.6976	30.0862	31.1815	30.6873	30.6602	30.777	32.4545	33.0977	31.2536	32.1927	33.2101	55.5778	77.9339	95.1655	100.25	111.209	105.619	105.129	108.811	109.699	110.248	107.711	101.512	102.523	106.822	99.6367	105.989	102.387	99.0565	103.261	97.7155	94.0557	98.0917	94.6811	97.1807
	14.8933	14.8933	15.2916	15.4551	15.8136	15.2619	14.7661	14.0554	14.2647	14.034	14.4833	14.6916	14.8562	14.2602	13.5225	14.5002	14.8499	14.4835	14.0112	13.807	14.5113	14.9165	13.88	14.5825	15.2276	19.2699	21.046	22.5009	23.1997	22.8955	22.2883	23.2096	23.7657	23.2248	22.4096	22.4029	22.287	23.1303	23.3721	22.0321	22.7861	23.433	23.1061	22.3693	21.664	22.1617	22.6029	22.696	23.2811
	26.8572	26.8572	27.251	27.5603	28.047	27.4946	27.0146	26.4676	26.1146	26.6223	27.3781	28.1907	28.2373	27.5327	26.5962	27.8368	28.2386	27.3988	27.0696	26.69	27.2951	27.6133	26.1793	27.102	27.8245	28.8148	29.4327	31.4724	33.1952	33.0536	32.154	33.7766	34.9503	34.2339	33.8948	34.5215	34.2771	35.0203	34.9447	33.4035	34.2905	35.1828	34.4582	34.2663	33.2505	33.9654	34.1495	33.7686	34.5203
	27.5026	27.5026	28.0352	28.9579	29.3404	28.729	28.6307	28.1437	28.101	28.6611	29.779	30.6778	31.2063	30.779	29.5879	30.5649	30.9501	30.4359	29.9724	29.8609	30.6407	30.7373	29.7947	30.6958	31.5397	37.0502	41.702	55.7701	68.0918	72.1066	71.8151	77.9006	80.3015	79.6951	78.5859	83.9981	82.6423	81.5812	79.4193	78.3477	77.9377	80.8817	78.1158	76.794	73.5367	74.1894	72.3725	72.8143	75.9441
	28.0578	28.0578	28.7573	28.7947	29.3822	28.6929	28.3402	27.2838	27.4863	27.1107	28.1161	28.2406	27.9288	27.8043	26.9435	28.0727	28.4961	28.08	27.5204	27.5145	28.5196	28.7942	27.9286	28.985	29.8983	35.2699	50.6255	92.8988	152.051	180.804	188.466	192.219	178.687	171.01	163.697	155.397	146.42	149.467	143.523	135.464	141.999	149.459	149.348	157.631	151.501	148.281	144.519	148.722	141.774
	26.5343	26.5343	27.0757	27.8641	28.3846	27.4226	26.5853	25.9313	25.3975	25.1576	25.9026	26.462	25.8179	25.1865	24.2247	24.8924	25.2243	24.4692	24.1574	24.0653	24.3707	24.7691	23.7876	24.32	24.806	33.9007	36.6339	39.6498	41.2927	40.9772	39.9409	40.9903	41.221	40.4042	38.5696	38.9589	38.3295	38.9225	39.0856	37.4513	37.9119	38.337	38.027	37.4592	36.6575	37.23	37.6998	37.583	38.521
	22.6633	22.6633	23.3032	23.9006	24.747	24.1802	24.2684	23.7465	23.5249	24.2455	25.384	25.6079	25.6955	25.2902	25.171	26.0424	26.8623	26.1043	25.6641	25.7161	26.278	26.832	26.0678	27.2627	27.8565	61.1118	92.5913	124.43	147.746	151.499	156.386	162.091	154.007	145.297	134.362	127.443	121.592	122.315	119.826	115.566	114.211	116.537	113.026	110.749	107.55	104.671	105.686	104.838	103.552
	22.2716	22.2716	23.0067	24.1357	24.4504	24.8212	25.0783	24.7098	25.3274	25.3113	26.167	26.8023	27.7652	27.2573	26.4215	27.2073	28.1571	27.2142	26.522	26.2539	27.0775	28.0102	26.8523	28.446	28.8065	47.9514	56.9684	67.6256	73.6554	82.6013	95.4888	111.651	124.167	130.115	131.597	135.19	131.244	131.309	133.018	127.609	126.137	124.436	123.852	122.757	121.778	120.872	121.006	117.366	113.748
	23.3477	23.3477	24.3768	24.6238	25.502	25.2429	24.8294	24.5933	25.0053	25.0984	25.9974	26.4779	26.6947	26.0746	25.5955	26.7063	27.2496	27.0733	26.9304	26.4973	27.6501	27.6212	27.0213	27.3885	28.3832	33.3747	39.6254	52.2343	90.4933	133.374	135.467	131.152	126.868	119.035	113.343	108.11	105.407	103.576	105.555	102.556	102.326	101.914	101.278	99.6029	97.2709	96.5218	94.4317	96.4573	98.0765
	26.1114	26.1114	27.0792	27.5268	27.809	27.5521	27.3103	26.266	26.4604	26.4217	27.3111	27.6212	27.7708	27.1146	26.201	27.494	27.8758	27.24	27.2215	26.7425	27.5206	28.3195	26.9384	27.7499	28.6815	32.172	32.853	34.2433	35.7244	36.3913	35.8729	36.7634	37.3763	36.534	35.405	35.4018	35.3134	36.2031	35.9009	34.5344	35.389	35.963	35.4518	35.2651	34.0914	34.4727	35.0666	35.1883	35.5387
	29.6205	29.6205	30.3291	31.2067	31.7367	32.1061	31.6457	31.789	31.8353	32.0222	32.832	32.9001	32.8691	32.2882	31.4425	32.6526	33.2729	32.7623	32.16	32.2629	33.6586	33.4433	32.4881	33.8057	34.2028	54.8574	108.999	135.52	148.144	148.087	147.052	144.544	143.252	137.405	133.737	128.181	128.447	122.235	114.839	107.729	109.065	113.723	111.223	109.241	108.085	108.316	103.366	100.057	99.5074
	22.5376	22.5376	23.4244	24.0022	24.8558	24.7125	24.6599	23.987	24.1781	24.1002	24.9974	25.175	25.0767	24.9734	24.2423	25.5814	26.0024	25.2853	24.9729	25.1209	26.1465	26.4494	25.4475	26.4015	27.0869	75.4934	130.855	168.894	189.26	202.613	199.248	197.997	197.687	195.597	188.638	187.99	184.59	185.184	179.892	181.131	181.118	187.509	181.22	179.91	175.463	178.584	175.988	169.026	168.031
	32.8109	32.8109	34.576	35.0059	35.8584	35.7171	36.2411	35.9276	37.0492	37.4326	38.6004	39.2255	39.3322	38.7601	38.227	39.9037	40.6761	40.0704	40.4181	41.1081	42.4385	42.4993	41.3507	42.3187	42.6714	47.9112	56.0517	73.5021	87.3057	105.348	118.454	133.943	144.384	151.618	156.983	156.373	151.291	151.951	146.503	137.911	137.485	137.002	133.142	128.695	121.189	125.423	122.005	116.144	117.291
	15.6804	15.6804	16.4112	16.8952	17.7155	17.2106	17.2843	16.5438	16.6227	16.8081	17.7961	18.2907	18.3985	17.9848	17.3004	18.5903	19.3561	18.7442	18.5564	18.5322	19.3894	19.741	18.7792	19.7791	20.7775	55.7023	58.4856	59.3953	59.2781	57.1458	55.0021	56.544	56.9712	56.6783	55.918	55.3317	54.5464	55.0968	55.0225	52.3688	53.164	53.5402	52.3676	51.3965	50.6553	50.1537	50.0741	50.2964	50.7142
	23.7726	25.7267	24.9989	25.1475	26.1839	27.7508	27.0987	27.2678	28.3661	29.5701	29.3351	29.2306	29.8264	30.4529	31.1322	31.8288	32.2578	32.0169	32.525	33.891	33.697	34.2472	35.0659	35.4206	36.599	42.6699	45.8716	50.2779	54.3431	58.8366	63.0533	66.5552	69.9671	73.4358	76.2039	81.7419	86.7543	90.0476	93.1968	96.8627	99.9019	103.059	106.865	110.587	112.469	113.211	117.656	118.795	119.213
	27.2428	29.0402	28.2923	28.3966	29.5204	30.8743	29.9426	29.9076	30.9451	31.6932	31.0981	31.3644	32.061	32.8334	33.717	34.2733	35.1155	34.9301	35.7457	37.275	36.8709	36.9978	38.0412	39.136	41.4684	44.7352	52.5144	67.8367	90.3061	118.307	146.405	164.673	183.351	197.906	205.192	218.753	227.14	230.9	234.202	236.411	240.019	240.358	241.239	248.233	248.702	243.558	248.666	244.803	242.184
	31.1861	33.2756	31.5603	31.1288	31.4774	32.3797	30.8189	31.0115	31.6149	31.8603	30.7123	30.6649	31.0765	31.8603	32.13	32.4009	32.644	31.8538	32.1245	33.2416	32.7777	32.7698	33.3412	33.5001	34.4571	41.0107	46.0396	54.4895	58.4577	62.3382	66.7518	71.2408	74.7984	79.243	83.4065	89.6693	94.2036	98.5947	102.478	107.508	111.273	115.953	120.989	126.931	131.041	134.497	142.507	147.708	150.504
	36.7739	38.2441	37.156	36.3751	36.8433	38.321	36.6539	36.4881	37.2852	37.421	36.3099	36.4629	36.4347	37.0457	36.9576	36.9909	36.8665	36.3282	36.6805	37.5489	36.2962	36.8375	37.3458	37.5048	38.5721	45.6124	55.8293	72.0262	82.2772	92.5299	102.038	108.451	114.446	120.541	124.035	131.738	136.682	140.722	145.271	149.673	153.145	156.808	162.521	167.985	169.135	171.382	178.087	181.797	181.235
	29.3645	30.923	29.8247	29.5579	30.887	32.6443	31.1945	31.504	32.4062	32.9655	32.4149	31.9909	32.2938	33.2783	33.41	34.0329	34.4898	33.748	34.0453	35.2408	35.0037	34.9839	35.5225	35.7723	36.6406	54.5334	88.7992	153.483	186.426	218.536	237.064	237.665	235.706	230.355	221.809	216.371	209.126	199.15	195.034	189.197	184.813	176.797	178.257	177.146	172.474	167.252	172	173.615	169.304
	28.8466	31.0426	29.6579	29.5236	30.13	31.803	30.8871	31.323	31.9465	32.297	31.4024	31.2735	31.1119	31.8224	31.7275	31.8661	32.4935	31.5662	31.3015	32.2035	31.7381	31.3669	31.5304	31.402	32.1096	52.3224	114.603	193.606	239.424	269.789	288.572	298.278	303.926	300.866	304.594	310.31	313.67	311.974	314.07	316.917	321.214	322.655	326.69	327.62	325.391	323.902	333.452	335.848	333.08
	25.6309	28.0225	26.9025	27.4253	28.5454	30.0511	29.0531	29.3895	30.7515	31.5899	31.0715	30.273	30.1045	30.6477	30.7386	30.0411	29.1416	27.754	27.5831	28.0846	26.8489	26.1115	26.2781	26.1671	26.6475	37.0214	43.8046	52.5889	60.3146	67.1868	73.3818	78.7439	83.2317	86.792	90.5906	98.9568	104.229	108.616	112.322	117.805	120.798	125.586	130.558	136.389	139.387	142.462	148.773	152.443	154.288
	46.1589	50.2236	51.405	51.5959	52.6294	55.8689	54.9043	55.9513	58.8538	59.8306	57.2486	55.5122	54.6469	55	54.0495	52.5572	52.6878	50.9164	50.3207	50.9382	49.5102	48.6396	49.0833	48.7935	49.8132	61.2875	75.4103	101.677	125.753	151.479	167.891	182.739	197.195	206.374	213.704	224.7	234.324	246.341	251.578	265.343	275.409	287.237	300.646	309.469	316.008	316.489	328.993	332.064	328.63
	63.6212	66.0501	64.8633	65.153	66.4134	68.2929	66.9995	67.4304	68.6392	69.2184	68.6059	68.8879	69.8848	71.0231	71.9568	72.7652	73.3925	72.8635	73.4377	74.876	74.5191	74.5752	75.604	75.9433	77.337	79.9645	83.3616	89.083	96.5664	105.29	114.881	123.325	133.056	142.341	151.158	163.763	173.94	183.435	193.197	202.647	210.185	217.798	226.078	233.884	238.613	241.412	249.661	252.317	253.123
	38.1094	39.8575	38.7368	38.8489	39.756	41.3485	39.8421	40.1751	40.9058	41.6515	41.4624	41.6456	42.0112	43.0672	43.4237	43.467	43.9105	42.6374	43.0269	44.0841	43.3694	43.6801	43.8334	44.31	45.7911	49.1126	51.9847	56.1164	62.1137	68.7913	76.0449	82.0054	89.0459	96.0148	102.486	111.796	119.56	126.078	132.853	139.318	145.029	150.516	156.88	162.708	166.046	168.888	175.964	177.211	178.61
	42.8018	44.7321	44.2011	44.5015	45.9474	47.9062	47.5798	47.9362	49.2728	50.5547	50.5846	50.9497	51.7376	52.9005	53.7848	55.0002	55.9029	55.7496	56.7264	58.3612	58.6635	59.4063	60.7662	61.7232	63.3142	65.9107	67.698	70.8924	74.7908	78.704	82.769	85.9548	89.1127	92.7919	95.5417	101.454	106.187	110.096	113.74	117.9	121.482	124.565	129.397	133.903	136.499	138.72	144.446	146.49	147.953
	38.0216	40.2218	38.7926	38.7945	39.0667	40.3132	38.6356	38.9425	39.8008	39.8947	39.0352	38.5372	38.3979	39.5925	39.2572	39.2841	39.1327	38.2701	38.2726	39.3624	38.6728	38.6714	39.276	39.2561	40.658	55.0937	68.8495	88.2804	114.522	138.315	153.589	167.057	175.606	177.943	180.716	187.196	186.303	184.397	183.723	181.45	178.723	175.783	176.599	175.896	176.309	175.911	177.636	180.199	177.977
	34.3038	36.4976	35.811	35.2502	36.4196	37.4155	36.0824	36.4708	37.525	37.8909	37.223	37.5513	37.8024	38.7159	39.0101	38.9093	39.202	38.8538	38.7404	40.2569	40.5985	40.694	41.8228	41.3182	41.8324	116.823	187.489	258.131	298.425	334.242	358.453	372.54	378.175	378.809	377.665	378.133	368.567	357.164	348.35	340.81	327.758	316.972	310.89	301.067	294.827	288.69	289.573	288.754	284.129
	35.5371	37.5863	36.3209	35.8277	36.414	38.3705	37.3785	37.0011	38.0743	38.8601	38.0145	38.0987	38.2902	39.261	39.0194	39.0737	39.1542	38.6393	39.0913	39.9071	39.912	39.686	40.1571	40.6323	41.3909	76.9914	113.63	152.374	180.779	211.432	227.022	236.924	244.504	246.739	243.025	247.579	246.689	250.198	248.935	249.629	246.132	243.791	245.402	250.794	248.376	247.512	250.083	247.179	244.598
	28.6189	30.1775	29.2144	29.1779	29.4444	30.8658	29.4835	30.0424	30.9241	31.2997	30.7157	30.5726	30.4243	31.3394	31.5668	31.8497	31.8718	31.3128	31.8006	32.826	32.4237	32.4586	32.9906	33.1035	33.9393	53.1898	83.654	114.127	137.341	157.746	168.212	178.463	183.58	189.477	187.523	194.419	195.454	191.423	191.576	191.718	188.132	185.75	186.051	186.137	186.18	187.032	187.813	187.528	185.536
	36.9579	39.1979	38.0405	37.349	37.5701	38.8172	37.1477	36.9044	37.5221	38.4676	37.587	36.9085	37.2535	37.4507	37.2923	37.4979	37.7223	37.2391	37.8182	38.3895	37.603	37.4555	38.2449	37.9168	39.5094	53.857	74.9894	99.4823	126.313	151.607	174.085	190.942	200.104	206.174	209.284	217.642	221.946	224.031	222.849	223.876	222.355	222.154	224.218	226.003	226.25	222.518	226.564	225.582	223.448
	27.5117	28.952	27.9053	28.2463	28.8308	30.3817	29.5073	29.3431	30.0762	30.9133	30.1614	30.0442	30.2246	31.0249	31.5071	31.6674	32.1985	31.4908	32.1284	33.4924	33.1876	33.7435	34.6734	34.6843	35.7302	43.8096	56.0999	71.7368	84.836	94.8283	101.405	107.714	111.23	116.702	118.816	125.027	130.614	134.063	135.521	138.947	142.38	144.192	147.959	150.564	151.632	151.844	156.341	155.596	155.605
	17.0061	17.164	17.0238	16.9282	17.4095	17.2917	17.4022	17.4975	17.8999	18.421	17.6692	18.4253	18.6092	18.2491	18.646	19.211	19.2576	19.2174	19.3235	20.008	20.008	20.2508	20.417	20.103	20.3385	22.8072	26.0723	29.425	33.0971	38.3286	45.1525	50.9113	55.6866	60.384	66.7354	72.3737	76.2143	80.821	85.2383	89.1238	92.666	94.7131	95.7894	97.8532	99.9739	101.238	101.374	101.695	103.353
	12.5545	12.7392	12.3206	12.0811	12.18	11.7115	11.2275	11.4458	11.962	12.1261	11.0827	12.0981	11.8402	11.2969	11.9223	12.3047	12.0695	11.8562	11.8506	12.2898	11.9634	11.8548	12.0096	11.3995	11.0429	20.3156	64.5037	115.122	142.47	164.285	180.101	188.709	191.84	185.908	179.073	175.067	172.798	167.133	161.015	154.109	149.646	144.485	137.281	133.202	128.553	122.173	116.756	115.837	112.279
	14.7521	14.6496	14.18	13.9815	14.2984	14.1569	13.8552	13.5632	13.979	14.2558	13.2381	13.7394	13.4942	12.9944	13.5033	13.8603	13.3811	13.4772	13.5823	13.8656	13.677	13.624	13.6051	12.9979	13.3349	18.3966	28.2944	44.977	70.9501	99.4201	111.665	117.932	121.509	130.008	133.167	134.326	130.066	129.009	127.613	125.31	123.443	121.228	117.261	115.616	114.789	112.508	110.139	108.678	107.822
	14.7003	14.6053	14.2476	14.6113	15.2612	15.0832	14.5577	14.2934	14.9824	15.3354	14.6026	15.2454	15.1016	14.4744	14.5294	14.6655	14.1589	14.0742	14.215	14.541	14.2565	14.3345	14.4836	14.2287	14.4721	18.2913	23.1618	28.5413	34.3496	41.9373	50.1476	58.4369	66.132	73.1445	82.0453	90.1452	96.3054	102.486	108.055	112.881	117.426	120.275	122.108	124.687	127.2	128.877	128.942	129.524	131.536
	6.74865	6.59973	6.47464	6.76991	7.07814	7.10013	6.88347	6.85697	7.35292	7.60378	6.71665	7.22678	7.04256	6.72846	6.70974	7.14146	6.71129	6.68453	7.06181	7.48422	7.38938	7.45375	7.62433	7.43238	7.8921	9.5255	12.6575	15.065	17.789	21.8896	27.7352	33.2969	37.3901	44.0427	53.767	58.0266	59.527	61.6468	63.4655	66.9813	70.2412	70.2831	70.7739	71.2593	71.857	71.4457	70.1699	69.6612	70.7568
	15.063	14.998	14.2979	14.3714	14.5806	14.156	14.051	13.7088	14.2739	14.3298	13.6042	14.1692	14.2383	13.6622	13.8894	14.2192	13.7607	13.8943	14.2905	14.6323	14.6003	14.8353	15.0827	14.7605	15.0743	23.6512	28.6879	32.3396	36.3525	40.6802	46.3992	51.8897	55.8678	59.7067	66.1389	70.9678	74.7315	78.7909	82.676	86.5121	89.457	92.0168	94.2535	96.3193	98.7018	100.106	100.469	101.369	103.728
	18.5508	18.6432	18.0786	18.113	18.3312	17.792	17.5898	17.3941	17.7871	18.353	17.0589	17.8803	17.6289	16.9126	17.2954	17.6055	17.6552	17.5047	17.736	18.1864	17.9872	18.1856	18.0795	17.5285	17.3293	30.3703	65.6386	78.4354	93.9472	107.558	119.84	123.961	124.343	123.528	123.74	122.309	117.856	115.121	114.963	113.672	113.521	110.066	108.07	106.892	106.294	103.822	100.955	98.7618	99.2506
	10.3106	10.2576	9.69248	9.60052	9.88797	9.48036	9.29753	9.08423	9.58486	9.62974	8.69794	9.28783	9.15184	8.76578	8.7538	9.29492	8.85144	8.75811	9.06119	9.47626	9.44813	9.38165	9.4587	8.94233	8.87018	15.0004	21.4436	30.2967	45.8251	64.3642	74.4624	87.1551	89.813	93.0121	98.6271	101.053	102.055	101.396	102.54	102.569	102.12	101.548	100.414	99.9325	99.5338	99.9282	98.0637	96.9687	97.2859
	14.5768	14.902	14.1652	14.1243	14.1969	13.7619	13.5479	13.4578	13.8301	13.8438	12.9921	13.3199	13.0018	12.6552	12.5913	13.515	13.1824	13.2176	13.3988	13.8074	13.5822	13.4164	13.5971	13.1642	13.1585	20.6464	32.3887	57.7175	71.184	85.764	98.3854	101.448	102.752	103.765	108.821	110.545	109.348	104.447	100.151	100.15	98.8968	95.0938	90.9492	88.616	86.9122	87.665	83.7289	79.9548	78.3616
	13.9681	13.9305	13.6456	13.698	14.1954	14.063	13.8326	13.9405	14.6207	15.3831	14.3677	15.2298	15.201	14.7662	15.2524	15.8461	15.7877	15.9597	16.3672	17.0384	16.9465	17.0639	17.3881	16.9776	16.9549	22.9458	25.8786	27.6516	29.3782	31.616	34.2572	37.0928	38.647	40.2333	43.5899	46.3964	48.4323	51.0058	53.7579	56.3256	59.0312	60.7232	62.1078	64.6591	67.4801	69.3081	69.9333	70.7938	73.1172
	13.1353	13.1439	12.4634	12.6697	12.8264	12.2908	12.1908	11.7006	12.12	12.5833	11.4079	12.0859	11.9035	11.225	11.5787	12.1489	11.5738	11.5464	11.8371	12.1557	11.949	11.9265	12.1251	11.8363	11.5694	16.0125	20.0622	22.2403	24.7509	27.7794	30.9715	34.1857	36.5476	38.6638	42.1821	45.1599	46.8244	49.2431	51.814	54.2649	56.9234	58.7261	59.587	62.3734	64.6537	66.4936	67.3136	68.4163	71.4645
	14.3361	14.4831	14.2142	14.3651	14.6566	14.4612	14.4921	14.2295	14.9681	15.4715	14.6245	15.4978	15.3392	14.9419	15.3552	16.1397	15.7377	15.7991	15.9616	16.6108	16.3943	16.6742	17.0795	16.7382	16.4549	19.1197	22.0325	24.629	27.3402	30.7402	35.0675	39.1508	42.1998	45.7338	50.7038	55.1303	58.1668	62.2522	66.4044	69.7443	73.0028	74.932	76.9797	79.7622	82.83	85.1454	86.1955	87.104	89.6997
	7.43372	7.6548	7.16665	7.33479	7.79397	7.27156	7.30859	7.44144	7.8404	8.19254	7.27809	8.0777	7.98543	7.57495	7.78359	8.33856	7.92884	7.87819	8.28204	8.5404	8.44519	8.43684	8.57972	8.25815	8.40442	12.9193	17.6121	22.253	30.6716	46.4162	66.3739	96.9737	133.487	159.35	179.878	196.825	196.743	189.896	180.085	170.401	165.318	158.864	154.5	150.609	145.282	142.15	135.916	131.723	129.474
	14.5593	14.7493	14.6013	14.3335	14.5597	14.1959	13.7343	13.5006	14.5419	14.534	13.408	13.9582	14.0947	13.7175	13.8153	14.2957	13.732	13.4643	13.921	14.6236	14.3356	14.3775	14.3828	13.7622	13.5517	78.1923	125.623	152.131	160.675	164.646	168.102	170.117	167.773	168.458	167.255	165.513	164.777	161.037	156.808	155.007	151.366	149.97	147.313	147.791	142.08	140.511	129.35	126.758	127.278
	22.037	21.9089	21.6353	21.5919	21.9096	21.8452	22.2112	22.487	23.1805	24.0345	23.4663	24.5472	25.3	25.6407	26.461	27.6068	27.6796	27.8284	28.3169	28.9851	28.6792	28.7732	28.9503	28.1412	27.8174	30.5924	33.6661	35.5554	37.6533	40.7376	43.9505	47.11	49.2522	50.8999	53.4815	55.5816	56.3662	58.6734	61.7901	63.7754	66.1509	66.4165	66.8254	68.61	70.0676	71.4268	71.8181	72.1436	74.4757
	7.45351	7.66439	7.37215	7.45081	7.99755	7.79776	7.79215	7.76153	8.33519	8.76005	8.03497	8.92612	8.91312	8.63164	8.77738	9.59168	9.23622	9.21155	9.50531	9.99271	9.75662	10.042	10.0242	9.79468	9.65664	12.3294	14.8793	16.4658	18.8102	22.2402	25.1204	29.3468	32.243	34.5661	38.0902	41.2883	43.5323	44.9869	47.8651	50.09	52.3456	53.8044	54.6803	56.0781	57.9811	58.8768	59.445	60.3298	63.3338
	9.86249	9.55889	9.06472	8.92371	8.88238	8.58658	8.16592	7.87954	8.27724	8.7859	7.59187	8.41251	8.29827	7.7808	8.19471	8.66705	8.14598	7.69187	8.15188	8.26978	8.00527	7.92655	7.84782	7.58542	7.65184	12.3526	16.7976	20.3473	23.6046	28.5937	33.6228	38.6539	42.079	45.7829	51.8756	55.9984	58.3938	61.3272	64.9064	67.038	70.4347	71.6377	73.003	74.7573	76.927	78.5221	79.1976	79.6329	82.2227
	8.53266	8.31405	7.82097	8.19108	8.62154	8.18983	7.96215	7.53965	8.22963	8.36614	7.39874	8.11347	7.90228	7.19108	7.39906	7.63602	7.71429	7.36273	7.47873	7.64531	7.51759	7.64673	7.63353	7.11383	6.76331	11.5691	16.3143	19.9262	24.302	29.581	35.1135	40.3796	45.2914	48.9551	55.2324	59.5236	62.0805	65.2908	68.7891	72.6946	75.6476	76.5511	77.4709	79.5093	80.6927	82.106	82.314	85.0324	86.2279
	11.5854	11.5803	11.3255	11.4019	11.8627	11.6671	11.4133	11.2528	11.9864	12.3902	11.4963	12.2205	12.125	11.7158	11.9133	12.5937	12.2685	12.1519	12.6268	12.9785	12.6692	12.6642	12.6798	12.3217	12.4706	20.3087	24.569	26.9044	29.4183	32.4751	36.7074	39.4352	40.8885	42.0267	44.5879	46.457	46.7666	48.4442	49.5455	50.8569	52.9689	52.7932	52.2652	54.0011	54.8424	56.3146	56.1257	56.1901	58.0384
	9.93482	10.2385	9.78254	9.91821	9.90705	9.58336	9.25113	9.28749	9.75402	9.89417	9.17734	9.87989	9.74597	8.91822	9.48973	9.85722	9.45138	9.58571	9.62324	9.99126	9.84963	9.95754	9.99025	9.42434	9.01822	65.1637	84.9833	100.564	111.37	117.188	122.664	123.841	123.329	121.314	122.038	123.902	120.508	118.908	116.994	114.697	114.567	110.857	106.269	99.9711	98.853	95.8714	97.379	93.0949	90.1277
	10.1047	10.5348	10.299	10.9273	11.858	12.2238	12.5892	12.6502	13.3554	13.9879	13.4798	14.4495	14.3447	13.9749	14.157	14.6308	14.1556	14.1377	14.3943	14.919	14.6871	14.98	15.166	14.6128	14.8638	17.3991	20.2167	22.5666	25.7839	29.1949	33.1603	37.1838	40.1102	42.7468	47.2182	50.5072	52.7934	55.2843	58.5069	61.1704	63.7291	65.3224	66.2661	67.9281	69.628	70.3309	70.445	70.9005	72.4072
	12.9744	13.1601	12.4763	12.6368	12.8863	12.6667	12.5158	12.2033	12.779	13.4043	12.6174	13.3825	13.0149	12.3178	12.6719	12.8919	12.3057	12.138	12.5125	12.7531	12.3419	12.3893	12.5453	12.0451	12.3538	16.2562	20.0361	22.613	25.8797	30.0823	34.1389	38.4357	40.9531	43.0854	47.7251	50.8138	52.3669	55.7884	58.5305	60.676	62.9358	63.8889	64.6472	65.7844	68.5305	68.9731	68.4512	69.3579	71.5275
	12.699	12.6886	11.8929	12.3006	12.2687	12.1209	11.3203	11.1744	11.8117	12.3785	11.4943	12.028	11.591	11.1274	10.989	11.6637	11.0506	10.8898	11.0242	11.1162	11.1249	11.0616	12.1192	11.8804	12.3063	44.8219	71.3478	88.8006	105.188	117.644	125.698	128.59	126.895	124.133	123.921	122.899	124.272	120.369	119.605	118.948	120.268	119.93	127.039	121.414	114.541	113.981	106.792	106.555	108.51
	21.591	21.2234	21.0332	20.7611	21.0967	20.3596	20.07	19.6981	19.93	20.5434	19.3504	20.1624	19.8008	19.0756	19.7815	19.9762	19.3737	19.1764	19.4578	20.0678	19.5934	19.7826	19.8182	18.7584	18.9005	149.709	229.948	269.678	297.147	300.947	303.512	295.568	277.99	264.655	248.98	228.478	210.447	206.436	192.606	178.483	171.575	167.741	163.159	164.291	144.93	151.482	138.909	139.181	135.041
	24.7166	24.502	23.7328	23.7263	23.6807	23.284	22.9677	22.7439	23.564	23.7345	22.8881	23.7032	23.2751	22.6882	22.6382	22.8841	22.4343	22.4283	22.9831	23.0052	22.5712	22.5048	22.6766	22.0784	22.2923	29.9045	52.447	64.1741	71.4739	82.8224	88.9257	92.0626	94.3224	99.1082	103.171	100.991	100.616	98.5935	99.2437	99.9415	101.331	98.7466	101.763	97.3969	99.3528	96.804	94.4615	92.931	92.3105
	12.8832	14.0676	13.7409	12.778	13.1506	14.1742	13.203	13.4652	13.1143	14.2113	14.1727	13.3929	13.5548	14.38	14.1142	12.9806	13.0444	13.5273	13.3354	12.1602	12.0473	12.3697	12.3181	11.6545	12.2584	19.2363	23.0395	26.9135	30.6582	34.7837	38.1152	40.2674	43.9186	49.6215	51.7713	54.235	55.9692	59.7441	62.4529	63.3516	64.0749	66.4332	68.9128	70.3903	71.3871	74.3919	74.2492	74.6452	74.9117
	19.5821	20.4426	20.1245	19.1414	19.1774	20.1835	19.2011	19.573	19.2757	20.2631	20.2419	19.0994	19.4048	20.3271	20.4655	19.4871	19.7546	20.357	20.5887	19.9218	19.3254	20.024	20.3975	19.415	20.0115	23.26	25.6313	28.418	30.9044	33.6551	35.7801	37.3498	40.4705	44.3003	46.2653	48.0512	49.8413	53.1305	55.6842	57.0516	58.3455	60.938	63.2179	64.2002	65.1263	67.5491	67.9481	68.541	69.8627
	78.7909	80.1325	79.3379	79.0614	79.5324	81.1731	79.2943	79.7233	79.7567	80.4391	80.1163	78.1362	79.53	80.1085	80.2576	79.0689	79.2746	80.4615	80.7863	79.8862	79.3108	80.3166	80.2503	79.1876	79.6955	91.0897	97.0304	104.491	110.69	116.676	121.907	124.416	134.422	136.874	135.884	138.08	139.115	143.606	144.49	145.609	145.913	149.803	148.359	146.644	145.075	143.444	142.977	143.193	141.758
	62.2884	63.2523	62.3327	62.1044	62.4891	64.1755	62.9175	62.7315	62.6629	63.1328	63.146	61.6557	62.2887	63.7015	63.5564	62.0622	62.5068	64.3619	64.088	63.1276	62.6392	63.1502	63.3579	62.083	62.522	73.3157	80.9958	89.0291	98.087	106.397	112.765	117.083	126.536	133.801	138.547	140.516	141.529	145.643	151.852	154.28	156.025	160.235	159.636	161.58	157.898	157.09	154.246	153.287	153.03
	76.2642	77.9474	76.6479	75.5057	76.8471	77.8564	76.4065	76.0211	76.0733	76.491	75.8453	74.7226	76.0662	76.2477	76.5601	75.2393	75.2519	76.3033	76.2718	75.4335	75.6322	75.1227	75.2988	74.8151	74.9013	87.0244	93.4879	100.58	112.351	117.768	124.668	128.077	137.704	144.352	146.757	151.803	150.664	153.603	161.062	161.384	162.526	165.551	166.224	168.586	163.429	162.941	160.71	162.735	161.104
	29.4864	30.2994	29.4874	28.7382	28.9872	30.2589	29.0557	29.392	28.9593	29.8514	30.046	28.6693	29.0144	30.2159	30.176	29.0239	29.1352	30.0958	30.0887	29.2957	28.8652	29.6644	29.5483	28.3797	28.8633	52.7842	81.0801	101.399	127.864	145.905	169.072	167.367	178.091	178.38	175.001	171.019	167.03	164.298	168.033	168.909	168.532	168.747	168.145	163.758	156.745	155.982	151.597	149.381	144.415
	25.4095	26.1048	25.3568	24.9016	25.0443	26.2428	25.099	25.3821	25.256	26.3985	26.6488	25.978	26.4318	27.1372	27.1346	26.1065	26.062	26.8761	26.9752	26.1753	25.6644	26.2454	26.4815	25.5029	26.2484	33.1998	39.4407	56.4135	66.068	75.7898	82.6463	88.4725	97.7595	102.86	104.708	103.426	102.463	106.217	108.786	106.361	102.8	103.943	106.603	103.855	99.886	99.2457	98.8524	95.8709	94.1786
	28.9648	29.8761	28.9868	28.1815	28.2829	29.7536	28.7563	29.1785	29.1169	29.9242	30.1059	28.8215	29.3191	30.3209	30.7018	29.6736	30.0774	31.0279	31.1651	30.2063	30.258	30.7161	30.8987	29.8391	30.318	33.7387	37.2902	43.1014	49.6808	57.8953	63.0547	66.5631	72.2994	76.6935	81.8866	84.8258	87.0764	89.0466	90.8459	88.8315	86.6344	88.3704	90.0219	89.9033	88.1103	89.5278	88.6628	90.9888	90.2314
	31.9226	32.6691	31.9369	31.5305	31.7066	33.5366	32.2691	32.4391	32.6765	33.6062	33.3778	31.7159	32.4314	33.4257	33.4985	32.6095	32.5883	33.4881	33.6729	32.7095	32.5328	33.2402	33.0998	32.3849	33.2394	150.009	201.216	233.646	241.578	236.895	236.416	228.727	230.058	235.105	228.171	219.079	210.761	209.845	204.553	196.579	185.168	180.084	176.739	167.919	166.67	161.449	158.308	154.449	150.694
	13.635	14.3558	13.7134	13.3584	13.4047	14.466	13.5128	13.5213	13.546	14.4095	14.2947	13.379	13.8071	14.5182	14.9144	14.0646	14.4171	15.1379	15.187	14.8394	14.842	15.3961	15.765	14.9751	15.536	19.5899	23.5799	28.3987	33.4554	39.2485	43.2615	47.9587	53.4896	59.7565	63.2179	65.886	68.8871	72.8506	76.6939	78.9722	79.8599	83.6295	85.7593	86.0641	86.5728	88.4518	88.17	87.9928	88.4344
	16.8341	17.4496	16.6888	16.0368	16.1938	17.295	16.2444	16.2027	16.1903	16.9146	16.6394	15.7774	15.7189	16.6453	16.8678	15.7012	16.0289	16.926	16.891	16.3074	15.9515	16.6034	16.5472	15.7077	16.2758	21.4532	24.8476	29.6101	34.0566	39.5182	43.2289	46.5641	51.7372	57.4022	61.5918	64.2652	67.9735	72.4049	76.5766	78.7991	80.6374	84.6276	87.7837	89.4596	90.6866	94.1536	94.635	95.5639	96.7748
	24.0024	24.601	23.931	23.2297	23.2787	24.6255	23.5489	23.7139	23.2779	24.2418	24.2815	22.9684	23.4811	24.3293	24.4643	23.4171	23.2449	24.0416	24.3135	23.622	22.9626	23.5861	23.584	22.8879	23.56	27.969	30.7582	33.8262	37.7117	41.592	44.2447	45.9361	49.6703	53.4845	55.9765	58.1579	60.4919	64.2894	68.1909	69.5632	73.2231	76.3271	77.8395	77.9228	78.1992	79.7497	79.5625	81.5556	84.1695
	22.0387	22.7174	22.0092	21.4408	21.4539	22.6816	21.6554	21.7409	21.9965	22.766	22.654	21.6917	22.3107	23.0278	23.2097	22.0632	22.3789	22.9428	22.9302	22.1766	21.7465	22.088	21.9599	21.1777	22.0516	26.9062	30.0915	34.1922	37.9821	42.5293	45.3152	47.546	51.8026	56.7198	59.5144	60.9848	63.3837	67.5549	70.5409	72.3998	74.0141	78.1609	80.4715	81.7051	83.0025	86.0432	86.6493	87.6371	88.7985
	12.6657	13.0329	12.4816	11.633	11.6289	12.8292	11.4659	11.6231	11.3889	12.1835	12.2024	10.9354	11.3023	12.0729	12.1437	11.0712	11.4509	12.1193	12.3178	11.8103	11.5337	11.9673	11.8851	11.2538	11.9509	20.0271	23.5708	27.4889	31.1934	34.4263	37.0582	38.6763	42.0886	46.2803	49.0052	50.8624	53.105	56.7059	60.1379	61.4368	62.6512	65.9333	68.4015	69.039	69.9563	72.319	71.7841	72.8328	73.8102
	14.8651	15.4576	15.0576	14.1947	14.3533	15.4005	14.1609	14.3684	14.2366	15.018	14.8875	13.8232	14.0682	14.9671	15.0326	13.9185	14.1582	14.8517	14.9235	14.2996	13.7601	14.5111	14.5542	13.9033	14.6669	23.6052	27.3938	31.4238	34.8068	38.5614	40.8731	42.4816	46.2838	50.4281	53.6146	55.6768	58.0261	62.1143	65.5532	66.8182	68.1098	71.4943	74.4527	75.1723	76.6285	78.9564	79.2373	80.4489	81.5791
	15.3125	15.939	15.4346	14.57	14.79	16.2036	14.8572	14.9231	14.9259	15.786	15.6049	14.7964	15.029	15.843	16.1634	15.1199	15.4924	16.1792	16.4591	15.7649	15.6752	16.4236	16.3389	15.7939	16.4063	19.5057	21.7835	24.805	27.7414	31.0437	33.1573	34.5748	38.1967	42.1166	44.6395	45.6268	48.1836	51.1009	54.1596	55.077	56.3422	58.94	61.3414	62.4509	63.181	65.3011	65.8002	66.8343	67.757
	12.2806	12.5214	12.294	11.6146	11.8205	12.7841	11.5116	11.6544	11.5869	12.3063	11.9462	11.1131	11.4168	12.2176	12.4071	11.45	11.7042	12.4067	12.5281	11.6742	11.4003	11.979	12.0098	11.2314	11.5914	15.0378	17.7012	20.5977	23.8764	27.6127	30.1765	31.8573	35.6761	39.9214	42.3897	43.8948	45.7972	49.2176	52.2769	53.7066	54.581	57.6909	59.7609	60.7055	62.2632	65.0603	65.0905	65.8896	67.1449
	18.3024	18.9737	18.4568	17.7247	17.8074	19.1595	18.0773	18.2218	18.1198	19.2796	19.2383	17.991	18.203	19.0967	19.4336	18.4989	18.5812	19.4092	19.91	19.3018	18.8925	19.5122	19.6683	19.0749	19.6977	24.752	29.4056	35.1051	40.9434	47.1494	52.2866	56.6579	63.1145	69.714	73.8541	77.3303	81.0966	85.9348	90.6812	93.1068	95.3948	99.7357	102.841	104.221	105.306	107.763	108.269	109.083	110.153
	22.4692	23.2189	23.2034	22.5023	22.837	24.3659	23.4703	23.3002	22.9199	23.6324	23.4778	22.6142	22.691	23.5217	23.7995	22.8883	23.1653	23.8813	24.1367	23.5165	23.0749	23.6224	23.4404	22.5364	23.2721	25.8448	28.4004	31.7836	34.8424	38.5171	41.5786	43.6184	47.8334	52.334	55.4641	56.9911	59.7543	63.4267	66.9803	68.545	70.0878	73.6069	76.6451	78.4978	79.863	82.7077	83.6257	84.7946	86.5424
	19.9108	20.3982	19.9743	19.32	19.4266	20.4997	19.6555	19.6849	19.5851	20.399	20.3497	19.287	19.599	20.4254	20.7308	19.6846	19.9955	20.6467	20.7499	19.9599	19.5926	20.4382	20.3751	19.5909	20.2456	22.5854	24.3147	26.9316	28.9736	31.8242	33.6583	35.0022	37.9628	41.3597	43.479	44.4181	46.2749	48.9871	51.5723	52.5635	53.6124	56.2732	58.2615	59.2152	59.9471	62.3211	62.2981	63.1118	64.3958
	18.9517	19.7079	19.1558	18.486	18.7282	19.938	18.7535	18.8138	18.921	19.8468	19.817	18.7471	19.1763	20.3041	20.3158	19.3279	19.6617	20.3242	20.548	20.2689	20.0386	20.5324	20.723	19.9822	20.5913	24.1222	27.2026	31.192	35.448	40.1061	43.9277	47.1462	52.254	57.8466	61.81	64.7622	68.7933	74.0034	77.7613	79.6471	81.1905	85.4327	88.6993	90.0713	91.2929	94.361	94.8281	96.2468	97.0409
	18.1666	19.0313	18.5944	17.8923	17.9719	19.4102	18.3447	18.7932	18.6792	19.3664	19.4305	18.3545	18.7579	19.6475	19.7403	18.6159	18.8289	19.4821	19.6045	18.9405	18.4459	18.9751	18.9685	18.3862	19.2252	23.0868	26.0794	30.0894	34.5741	38.4114	41.8828	44.2588	48.5281	53.551	56.3171	58.5166	62.2108	67.4122	71.3801	74.3485	77.0357	81.1023	84.7611	87.3007	89.1899	92.7731	93.6841	95.9627	97.5377
	15.9391	16.7124	16.3926	15.7584	15.8347	17.0431	16.4078	16.6452	16.7926	17.6055	17.7091	16.9317	17.2811	17.9917	18.2119	17.1801	17.3138	17.9666	17.9466	17.2866	16.7373	17.3929	17.2581	16.5649	17.0862	22.6811	26.8408	32.8813	38.548	44.8596	50.6425	55.6015	62.7161	70.1177	75.7783	79.9345	84.909	91.4016	96.7897	100.447	103.736	108.639	113.276	115.173	117.629	121.184	122.02	123.667	125.561
IKO 1	13.5471	13.9963	14.2994	14.0373	13.6558	14.1819	14.5872	15.1822	15.1337	16.3273	15.6479	16.1735	16.2784	17.5839	17.6429	18.2433	19.39	18.7393	19.0139	18.7043	19.4689	19.3012	18.6352	19.2446	18.7547	18.687	19.9318	20.4833	19.2455	18.4522	19.4606	19.5506	18.4745	19.3269	19.1887	19.8135	18.7345	18.4099	18.9571	18.9692	18.5528	19.0618	18.2908	17.61	18.5899	18.5995	17.58	17.1632	18.0046
	12.4055	12.8082	13.2439	13.7393	13.9796	14.5746	15.4338	15.4951	17.1892	18.2864	17.4058	16.4921	16.8211	17.2644	17.1295	17.0696	18.6277	18.1873	17.3224	17.302	19.0059	18.3428	17.4233	18.0881	17.7027	18.4965	19.8095	19.6603	21.517	21.387	21.8186	23.2339	22.8724	25.7873	26.802	26.2224	24.9495	28.3279	28.7922	29.4718	30.9413	32.2798	31.2734	30.1014	31.4585	31.1032	31.0985	31.5063	32.1363
	17.236	17.3727	17.648	17.8359	17.1114	17.1625	17.5897	17.8392	17.6776	19.0185	17.9328	17.9074	17.6133	18.3483	18.203	18.1388	18.8544	18.1486	18.9356	19.1688	19.9016	20.0568	19.2448	20.2299	20.0159	19.3628	20.3077	21.0406	20.3153	20.8043	21.2965	21.6039	21.3001	22.5445	24.0734	24.5917	23.3408	23.0275	23.9298	24.6782	24.3197	25.6613	25.0889	24.3135	25.1997	26.169	25.0808	24.7244	25.5989
	17.4659	18.2939	17.9237	18.07	18.3052	18.3715	18.5298	18.2493	18.4183	19.4187	18.216	18.2275	17.4524	17.9675	17.7523	17.96	18.7592	18.5392	18.3514	18.0389	19.0192	19.1151	18.0476	19.2425	19.1867	19.1675	19.2712	19.7208	19.2344	19.2934	19.5161	20.0374	19.5019	20.6504	21.4173	22.0804	21.2414	21.0084	23.0184	22.8543	22.3705	23.8624	22.7066	21.4539	22.2183	22.4122	22.1339	23.2632	24.6222
	10.1928	10.3978	10.5994	10.3596	10.1858	10.1727	10.5095	10.2822	10.4851	11.498	10.4861	10.4732	10.0251	10.5141	10.3241	10.2608	10.9217	10.1807	10.1512	10.1385	10.8475	10.6172	10.3544	11.159	11.2401	10.5922	11.1197	11.5978	10.8655	10.4578	10.8582	11.4302	10.8796	11.865	11.8621	12.4861	11.9841	11.7144	12.223	12.4006	12.1066	13.0278	12.2585	11.8313	12.6911	12.9253	12.4643	12.6771	13.5979
	17.2114	17.5035	18.087	17.8682	17.7273	17.9109	17.9511	17.9003	17.7576	18.913	17.8914	18.0422	17.53	18.0776	17.5252	18.0222	18.8277	18.1641	18.0858	18.1351	19.14	19.3232	18.7103	19.7595	19.4933	19.1437	19.4983	19.9018	19.5529	19.0681	19.4225	20.2136	19.4897	20.5894	20.4334	21.3185	20.5316	20.2639	20.5013	21.2417	21.1437	21.9136	21.1426	20.2184	21.2364	21.93	21.423	21.3665	22.3769
	18.8421	19.0382	19.1843	19.05	18.6361	18.879	18.9305	19.1433	19.1477	20.4217	19.1268	19.3669	18.9174	19.5647	19.2377	19.2421	20.1856	19.4863	19.5849	19.5365	20.62	20.4472	19.8795	20.9732	20.7348	20.6989	21.2463	21.6572	20.8866	20.7067	21.5192	22.117	21.3574	22.481	22.4712	23.0627	21.9323	21.7154	22.1195	22.4634	22.1512	23.1315	22.5095	22.0447	23.0064	23.9071	23.0268	22.7867	23.9634
	16.269	16.4398	16.605	16.5621	16.6577	16.7782	17.1344	17.0344	16.9693	18.0282	16.8377	17.1726	16.5822	17.345	16.9932	17.1722	17.7599	17.1037	16.9233	16.6055	17.2877	17.441	16.6301	17.7279	17.2475	16.4173	16.9319	17.7956	16.9082	16.2858	16.9816	17.4419	16.9767	18.2125	18.0661	18.5483	17.6963	17.1943	17.5484	18.0232	17.53	18.0683	17.5406	17.1936	17.7085	18.1465	17.5107	17.2964	18.5499
	20.1609	19.9975	20.478	20.0722	19.784	19.7842	19.9306	20.06	19.8594	21.0242	20.0122	20.3491	19.6464	20.2681	20.039	19.9845	20.787	20.041	19.8988	20.013	20.9647	20.6764	20.1988	21.3241	21.0626	20.6479	20.9165	21.6377	20.7939	20.2953	21.1393	21.6239	21.0527	21.9412	22.1148	22.6147	21.7544	21.6823	21.8922	22.421	21.9079	22.7719	22.1297	21.6398	22.5427	22.8286	22.3272	22.3694	23.5548
	11.0904	11.3119	11.6585	11.4149	11.0365	11.4976	11.6663	11.7797	11.8407	12.9005	11.8312	12.1516	11.9254	12.6389	12.2717	12.2199	12.9177	11.9884	12.0591	12.3939	13.0454	13.07	12.7316	13.5014	13.0701	12.3931	12.7977	13.3957	12.4228	12.1632	12.6309	13.7521	12.7979	13.5608	13.3855	14.13	13.5587	13.5068	14.0185	14.2343	13.5203	14.3394	13.7187	13.0353	13.9386	14.3966	13.7046	13.7491	14.7063
	20.7066	20.1515	20.4945	20.3441	19.5522	19.598	19.6465	19.7309	20.0305	20.7721	19.6244	19.6676	19.0644	19.7253	18.8428	19.5513	20.1799	18.9179	19.3374	20.1135	20.7831	20.5259	20.3932	21.7125	21.5581	21.7747	22.3872	22.2915	21.3706	20.9731	21.1442	21.0647	20.5126	21.2839	20.933	21.6408	20.5828	20.234	20.8078	21.3677	20.6998	21.6092	20.5713	20.0841	20.8442	21.6264	20.749	21.1661	22.1313
	38.7336	38.2324	38.9991	38.7431	39.2101	39.3984	39.3923	39.0054	38.4374	39.3577	38.1765	38.2556	37.7097	38.265	38.3311	38.4303	39.3744	38.2979	38.388	38.6753	38.7898	38.5607	37.9655	38.8369	38.62	37.1406	38.0275	38.5208	37.6523	36.8993	37.8405	38.2424	37.7484	38.7755	38.6155	39.1335	38.5301	37.9868	38.8194	39.4302	38.9322	39.3704	38.7167	38.241	38.692	39.558	38.7324	38.6488	40.1308
	12.9936	13.3773	13.2963	13.3227	12.9567	13.6423	13.7621	13.7274	14.103	15.1124	13.8114	14.2203	13.7963	14.2912	13.799	13.6092	14.1758	13.4019	13.3184	13.3694	14.1804	14.4266	14.0495	15.172	14.9767	13.4789	13.9336	14.0426	13.2031	13.0042	13.523	13.9135	13.5244	14.3072	14.4653	15.0985	14.7029	14.8725	16.7287	17.7405	17.8263	18.5996	18.3416	18.129	18.6172	18.8509	17.8748	17.6069	18.6955
	21.5581	21.7471	22.1483	21.8875	22.1952	22.4822	23.3253	23.8696	23.9317	24.852	24.0732	24.0094	23.8179	24.5017	24.1057	24.4194	25.5314	24.2033	24.148	23.537	24.4237	23.9319	23.4522	24.284	23.6263	22.0824	22.535	22.9473	21.8564	21.4943	22.0269	22.5276	21.9185	23.2891	22.9626	23.4643	22.7396	22.5807	23.4165	23.5178	23.5961	24.6653	23.8677	23.5992	23.9276	24.9189	24.1511	23.6828	24.9628
	26.1874	25.5364	26.6885	25.5856	26.6185	25.9858	25.8967	25.5666	26.3009	27.1827	26.4675	25.7069	25.778	26.9735	27.034	26.4949	25.1964	26.1155	26.4968	26.226	25.4246	26.3536	25.7452	25.7391	26.5082	30.0777	36.6279	51.5355	65.9837	79.2557	90.6156	98.7676	106.548	114.521	121.321	121.868	124.153	128.07	133.76	134.344	133.982	133.854	132.734	136.925	136.274	135.061	131.132	129.242	130.359
	24.2599	23.757	24.664	23.7116	24.7448	24.9541	24.3588	24.2723	24.7848	25.5554	25.3363	24.3153	24.0553	25.0969	25.4021	25.0629	23.6768	24.8659	25.1608	24.9364	23.7982	24.6354	24.0058	24.1879	24.3219	26.5963	29.4791	34.0572	37.7706	42.7169	47.2573	51.6682	60.4959	70.5598	80.8159	90.3298	100.097	112.368	136.866	152.512	166.912	175.627	180.589	182.755	189.543	186.379	181.892	176.417	177.517
	17.5149	16.9797	18.134	17.1377	18.0178	17.7909	17.1345	17.0161	17.5644	18.0517	17.5473	16.8572	17.0104	18.0401	18.1813	18.012	16.8293	17.7163	18.3394	18.0402	17.0473	18.0585	17.2131	17.2203	17.6031	30.9172	50.5679	74.3398	95.891	108.439	117.952	120.364	126.318	128.306	129.815	129.246	128.464	129.37	128.758	130.028	128.906	128.011	128.982	129.93	130.533	129.282	126.977	128.008	126.52
IKO 2	32.508	28.4058	23.4444	24.3907	20.6863	16.6531	16.3819	14.104	9.25996	6.65141	3.9429	2.35729	1.14161	-1.0602	-5.16238	-5.92064	-6.13188	-9.92485	-11.9467	-12.0957	-13.997	-16.6555	-16.9533	-18.3175	-20.4886	-33.7477	-28.6265	-20.1625	-14.607	-8.18312	-6.61007	-6.505	-1.41603	-2.58487	-2.7017	-4.7906	-7.7242	-11.0672	-8.84458	-9.83247	-16.23	-17.147	-18.2545	-20.2618	-20.8915	-23.2444	-25.5417	-26.9528	-28.3793
	101.982	98.7228	94.201	96.8835	91.6577	86.593	86.4623	83.2141	78.402	75.0922	71.1193	68.3711	67.3582	63.2087	58.8422	57.265	56.9544	52.2974	48.621	47.406	44.1609	40.0877	39.9743	36.9011	32.9069	8.92761	17.5695	36.2636	45.6447	51.5967	55.4062	55.3207	53.8001	57.6292	51.3449	52.7253	52.0347	41.5965	38.9437	39.6054	33.0393	30.1515	29.6679	25.6339	27.6307	21.2729	14.4532	22.8449	21.6653
	54.6684	52.5619	49.1183	50.9758	47.3268	44.267	43.7775	41.0598	37.5825	34.9158	31.4465	29.9316	28.9043	26.6344	22.9493	21.6407	21.7478	17.7744	15.0576	14.6679	11.931	8.41928	8.24653	5.89583	3.03493	-10.5434	8.56997	26.6356	44.8389	46.4877	53.0984	55.0318	55.8547	57.4438	54.6284	51.5812	49.8435	43.2857	40.914	38.1948	31.509	30.6835	26.4322	26.4801	21.64	15.4261	11.5407	6.42877	5.15015
	33.5978	32.2881	30.2244	33.5626	31.2893	30.4002	31.9547	30.6065	29.6548	28.819	27.5674	28.3415	28.3708	27.1241	24.3977	24.7012	24.7172	22.943	21.9343	22.8624	21.8131	18.6346	18.9977	17.4677	15.7768	3.92223	5.49646	8.43584	12.7424	15.8945	14.9469	19.018	17.7503	20.8459	18.656	17.3347	15.2532	15.0669	14.7503	12.3388	9.26226	8.46513	8.96194	9.58069	10.3972	8.34377	5.28029	4.87933	3.19544
	41.7517	38.3621	34.1113	35.1254	29.8828	26.6943	26.1998	23.5116	18.5861	15.8423	13.0696	12.1277	10.8695	8.06124	4.89524	2.73726	2.23397	-0.724575	-2.75943	-3.63292	-4.07048	-8.58544	-11.1767	-13.8763	-17.047	-25.244	-17.2101	-8.22133	3.1478	10.8826	10.8556	8.80811	8.33242	6.92602	8.53459	8.4673	3.08368	-3.73361	-0.68656	-3.2262	-9.58089	-11.0743	-12.3204	-11.6615	-13.3175	-17.2908	-19.5338	-19.5761	-23.5057
	31.3013	28.6218	23.6778	25.8714	22.4746	19.3061	19.3692	16.4577	13.2275	11.0547	9.04621	7.48322	6.51885	4.35115	1.973	1.25931	0.247785	-2.2571	-4.95969	-4.61733	-6.08542	-8.96632	-9.35275	-11.6012	-13.9059	-23.4417	-10.7377	-1.20266	9.74779	18.6333	19.569	18.1351	19.7928	20.9767	19.3347	18.5937	13.5301	12.5588	11.8131	9.06605	3.76478	3.71732	1.83104	1.26068	0.541917	-3.7094	-6.66081	-8.36546	-12.1119
	23.4598	22.4125	21.5073	25.5753	23.8603	22.9817	25.4144	25.3221	23.3952	22.5539	21.3281	21.0049	21.6546	20.3828	17.5634	17.659	18.1907	15.4203	13.2766	13.2283	11.9803	9.50036	9.55442	8.03498	5.92764	-9.68223	-5.31039	2.00158	11.3225	21.2858	30.0565	34.8773	39.9557	38.6352	47.3869	42.0273	39.4012	32.5838	35.1545	31.8102	25.5462	20.1754	19.4924	15.956	18.2715	21.9208	14.8535	9.0525	6.80486
	27.1599	25.5443	23.4521	26.0578	23.7324	22.0484	22.9408	21.7928	20.0267	18.3735	16.4599	16.5414	15.9324	13.8186	11.1575	11.0448	10.6099	7.32423	5.36133	5.66244	4.11597	1.42047	2.00971	-0.123266	-2.40289	-17.4545	-15.987	-13.7208	-10.9743	-6.09893	-5.09577	1.5574	3.07248	1.16947	0.455022	-0.732558	0.813889	-4.77458	-5.16331	-6.38649	-7.62073	-7.44716	-8.98561	-9.17735	-9.82455	-12.0952	-15.9956	-15.739	-18.443
	32.4503	30.6268	27.5773	29.7664	27.5225	24.8712	26.1909	25.1509	22.7922	20.5189	19.0022	18.5495	18.4668	16.397	14.2172	14.404	14.1191	11.8586	9.82894	10.4463	8.80369	6.45859	6.66972	4.80823	3.14719	-10.685	-3.54496	2.83242	8.4421	17.0653	18.5507	19.059	19.9464	18.7105	14.1958	14.7192	13.3985	11.4152	9.82652	9.65354	4.08475	3.64073	3.29841	3.64314	1.14354	-0.491925	-2.89762	-4.49326	-8.38331
	27.9698	27.8617	29.0025	28.1998	28.6765	28.4905	27.5373	27.6966	27.5672	27.9023	27.2704	25.995	26.016	26.9728	26.8091	26.1922	25.1721	26.1102	26.7691	26.6293	25.8752	27.0554	26.2988	26.4895	27.5647	40.6646	56.6072	83.6533	101.824	113.456	129.241	138.195	150.113	154.539	154.857	158.278	157.195	155.054	157.182	158.566	162.275	164.658	165.607	165.223	168.62	168.159	162.927	159.266	159.09
	22.7824	22.5344	23.4448	22.4861	23.345	23.3724	22.7879	22.8062	23.0534	23.5247	23.3512	22.4413	22.3325	23.4837	23.494	23.3026	22.0387	22.8337	23.6531	23.1849	22.4203	23.1258	22.4055	22.6917	23.271	28.8958	38.7478	49.5976	59.5933	68.3091	76.6598	83.4137	91.7438	98.3872	106.499	109.301	114.946	118.512	124.912	131.191	132.482	136.065	139.78	142.526	145.122	148.274	147.439	147.933	150.933
	25.707	25.6694	26.6679	25.5806	26.1357	26.0453	25.1786	24.9136	25.288	25.5892	25.2089	24.0009	24.2827	24.9183	25.2302	25.0681	23.7329	24.4556	25.2064	24.7879	23.3794	24.3115	23.347	23.6051	24.0488	26.057	29.018	32.9621	38.092	44.15	49.2704	58.2394	68.0306	80.6657	91.714	98.8756	104.575	114.615	121.128	132.788	135.997	141.412	143.76	145.956	149.796	152.093	152.065	151.945	153.72
	22.4543	21.9695	22.8889	21.8572	22.7625	22.4677	22.0084	21.9524	22.4473	22.9025	22.7523	21.8301	22.0044	22.7674	22.9527	22.9135	21.701	22.2971	23.0945	22.871	21.9979	22.8221	22.0389	22.2404	22.7025	26.3923	29.7793	37.5209	45.2884	54.0893	67.9344	87.2007	105.412	126.083	149.967	161.284	177.452	189.742	202.818	215.123	220.846	229.279	232.308	235.258	239.936	240.743	239.714	242.613	243.968
	32.186	32.18	33.2339	32.537	32.8257	32.7089	33.1097	32.959	32.7363	34.1737	33.0205	33.1336	32.4085	33.7718	32.812	33.4951	34.3596	33.6582	33.4843	33.6923	34.7029	34.4693	33.6374	35.4046	35.0866	34.0863	34.7673	35.2464	34.9735	34.435	35.4077	35.6338	35.0047	36.2524	35.8245	37.0355	35.8955	35.4918	36.187	37.0279	36.7985	37.418	36.4255	36.303	37.0851	37.7012	37.0127	36.6579	38.2126
	16.2223	16.3427	16.6307	16.4865	16.4536	16.6387	16.7152	16.6791	16.6482	17.6243	16.5461	16.8134	16.0709	16.9482	16.4986	16.7865	17.4391	16.6363	16.9824	16.9107	17.6262	17.5344	17.0501	17.8419	17.8416	18.0783	18.3203	18.7792	17.8546	17.5054	17.8884	18.555	17.9644	18.6751	18.4066	18.984	18.3289	17.9302	18.4987	18.9588	18.9573	19.5891	19.0489	18.5083	19.3254	19.9714	19.2258	19.2288	20.4962
	20.7644	21.0224	20.735	21.4895	20.7899	20.7723	20.8466	21.2692	21.3536	20.5548	20.7277	20.9098	21.5289	20.7033	20.2855	19.8134	20.3571	20.8496	20.9737	20.4624	20.5878	21.023	20.8335	20.5327	20.2909	23.1332	26.6984	40.01	60.1107	77.5339	88.9673	93.9911	98.9039	95.9367	96.7179	92.9954	89.0207	86.3226	83.6292	84.1503	80.438	77.3757	74.9618	71.1243	67.0065	66.1899	64.9865	61.6308	58.6282
	15.8829	16.2666	15.8544	16.4501	15.5636	15.549	15.9462	16.1805	16.4174	15.8063	15.7319	15.8547	16.5799	15.6221	15.5246	15	15.5264	15.8364	16.3117	15.4926	15.9357	16.1344	15.8414	15.4669	15.2287	17.1221	17.0668	18.8047	21.7528	23.0772	25.308	27.1684	28.6962	29.5049	31.8863	32.7003	34.4707	34.8003	35.6928	38.4219	38.7374	39.1153	40.5031	41.0316	39.3086	39.1207	40.1265	38.9884	37.748
	23.538	23.9064	23.4246	23.7724	23.1208	23.2711	23.42	23.8672	23.7131	23.0858	23.2971	23.301	24.2259	23.5722	22.9416	22.4792	23.0741	23.6403	24.0427	23.0887	23.637	23.5934	23.3715	23.2106	23.2028	27.3592	40.9677	59.724	77.3107	88.9616	99.2634	106.033	98.6984	94.9832	97.7859	89.6009	86.9851	85.8727	82.0236	80.5362	76.5527	70.154	69.1552	65.1863	58.6358	55.0201	55.1881	51.6778	48.1842
	26.439	26.2124	26.6356	27.1011	26.4695	26.3767	26.7664	26.6685	26.3992	26.3524	26.1634	26.3273	27.1783	26.4108	26.3206	25.4711	25.9206	26.6495	26.7432	25.8125	26.22	26.3125	26.417	26.2689	26.5658	30.0638	32.3019	38.7335	46.5079	58.1563	68.7343	78.8174	80.4697	76.0581	75.1839	77.8091	74.7645	72.2557	70.0443	69.022	62.4795	59.2985	57.0028	56.5641	53.8653	52.4609	51.4383	48.2807	47.5496
	31.1638	31.0215	30.934	31.0864	30.3987	30.6	30.7969	30.9758	30.8907	30.6495	30.6474	30.6029	31.2012	30.431	29.8642	29.3447	30.023	30.3164	31.0407	29.7984	30.4006	30.1373	29.8453	29.5698	29.7055	65.8091	100.523	134.088	147.091	149.565	151.206	149.262	143.452	139.217	139.226	135.578	132.17	126.489	122.716	120.088	115.301	108.524	106.684	103.004	96.4642	92.7992	88.9967	88.4868	84.3258
	24.3597	24.5248	23.9944	24.6482	23.5861	23.7663	23.9363	24.2946	24.3611	23.6704	23.9483	24.0134	24.9007	24.2934	23.5605	23.4544	23.9463	24.4765	24.9324	23.9897	24.4014	24.6148	24.2496	24.163	23.9984	27.6548	32.2328	42.4724	55.7714	63.7602	71.0589	77.6571	83.3063	84.8818	84.5662	83.071	80.7616	78.9981	79.5336	80.2428	77.3623	73.3541	71.5659	69.1131	67.528	64.4487	64.7257	63.5685	61.2785
	33.0337	33.3695	33.0318	33.4351	33.1975	32.8387	33.4144	33.3975	33.38	32.9512	33.1547	33.5265	34.5701	33.6825	33.1132	32.5298	33.2638	33.9429	34.7286	33.1514	34.2042	33.8492	33.6091	33.5069	33.9518	45.2278	66.7145	88.7691	112.269	128.847	140.926	145.885	149.41	151.879	150.431	148.352	147.071	140.931	136.266	130.769	124.881	116.284	110.977	105.13	100.204	92.5577	90.4348	87.1573	82.8812
	17.4502	17.7538	17.6533	17.7791	17.1479	17.2104	17.2407	17.7075	17.7101	17.3424	17.1853	17.2436	18.3619	17.4155	17.0657	16.7491	17.4247	17.496	18.0925	17.0859	17.4371	17.6699	17.4189	17.1747	17.134	21.016	22.4175	25.6202	29.2487	31.1204	34.6433	37.4656	40.3494	44.4993	49.3077	52.5814	56.759	56.6657	55.4033	55.9551	58.0626	55.4261	55.0598	54.6435	50.3009	49.7559	48.4452	46.8769	43.8962
	20.3468	20.5746	20.4587	20.8111	20.0293	20.0229	20.2666	20.5718	20.7669	20.4226	20.2717	20.3704	21.3427	20.6615	20.0224	19.7892	20.5	20.7615	21.2823	20.5433	21.2036	21.5791	21.0403	20.788	20.8584	42.8254	77.8426	108.794	122.875	126.559	132.827	129.892	127.569	122.029	119.294	115.327	110.371	102.95	97.8406	97.7837	91.5335	85.2234	85.675	80.1568	77.7986	73.1225	72.9104	69.8533	66.8323
	25.2826	25.6872	25.3306	25.7992	24.7263	24.678	24.7346	25.0449	25.1652	24.7192	24.975	24.8081	25.8984	25.0328	24.6077	24.0672	24.5095	25.3618	25.6064	24.6591	24.7476	25.2762	25.0186	24.5842	24.6439	27.5975	31.8133	38.3973	44.379	46.6361	49.6574	50.8745	51.3798	50.829	51.66	51.2634	52.7261	52.1876	52.6248	53.528	52.6814	52.4748	52.9258	52.6686	51.8431	50.9498	52.5833	50.038	49.5068
	21.5482	21.6793	21.0464	21.5792	20.4489	20.7381	20.8628	21.1485	21.4619	20.783	20.5901	20.7177	21.6784	21.0672	20.3066	20.0291	20.6444	20.9573	21.4313	20.8193	21.2228	21.0839	20.9148	20.6876	20.5744	24.9363	29.889	36.6169	43.4783	45.907	49.378	50.3332	50.4944	50.8289	51.4473	50.9138	53.1319	51.916	51.8419	53.6244	53.2955	52.9551	53.5205	53.2435	51.914	51.0115	51.8832	50.4851	48.9171
	24.4447	24.461	23.8346	24.3858	23.5655	23.344	23.6356	23.9326	23.9033	23.4016	23.6383	23.5994	24.4537	23.9769	22.7952	23.2174	23.2363	23.7851	24.2501	23.4829	24.2863	24.5445	23.6681	23.7024	23.7536	27.6615	43.376	61.4129	74.2596	80.0731	89.6769	87.2325	88.0556	88.6009	87.4063	82.4145	87.4118	81.293	78.7418	82.0756	82.9317	82.1801	81.3281	76.7929	72.3566	70.3961	70.6146	69.6863	65.0418
	30.1305	30.4009	29.9213	30.6562	29.8323	29.5879	30.0181	30.34	30.6088	29.7853	30.4298	30.4481	31.2478	30.4935	29.8397	29.7225	30.0179	30.568	31.1301	30.6325	31.0869	31.2784	31.0098	30.7279	30.4338	62.0522	102.74	122.091	144.551	149.245	152.413	145.025	140.635	138.292	135.604	129.969	132.994	121.925	122.081	120.454	116.752	110.435	111.811	106.429	100.291	95.7848	97.5419	93.6747	86.8803
	21.0697	21.1346	20.7547	21.3446	20.5357	20.5008	20.8214	21.009	21.3269	20.3419	20.6196	20.9203	21.8657	21.0681	20.517	19.9159	20.4107	20.6488	21.3692	20.7808	21.3038	21.4965	21.3085	20.9211	20.6042	47.5081	96.716	126.755	159.545	171.715	171.864	167.517	159.262	154.666	149.815	143.993	144.307	132.706	128.818	127.781	120.418	114.853	113.66	108.362	100.854	95.7999	96.0554	91.2925	85.0683
	18.6767	18.7846	18.6423	19.2156	18.3424	18.4928	18.6851	18.9777	19.1344	18.6635	18.6859	18.9811	19.9314	19.0984	18.6582	18.339	18.8376	19.1303	19.5346	18.8098	19.057	19.2217	18.9526	18.9905	18.7195	26.5427	33.9474	45.7186	72.9103	85.605	98.5162	104.465	104.453	110.953	106.138	106.145	101.617	96.8208	91.678	91.6534	86.5706	81.7527	78.978	73.1231	69.3325	65.7808	64.5244	62.7729	59.1911
	22.8807	23.0233	22.7726	23.314	22.1815	22.1095	22.4735	22.853	23.2367	22.6825	22.6772	22.824	23.4874	22.5662	22.1868	21.555	22.3627	22.7794	23.0634	22.5179	22.6581	22.9832	22.6141	22.5466	22.408	42.3619	78.3357	108.703	122.975	143.36	146.117	147.514	138.653	134.886	135.142	127.137	121.263	115.902	111.65	108.835	104.648	100.231	99.6423	95.486	91.7417	87.1437	90.6673	84.9416	81.3903
	19.9893	20.1827	19.8343	20.1848	19.6419	19.4385	19.8446	20.4925	20.5581	19.7447	20.0774	20.1899	20.9838	19.8842	19.4331	18.8746	19.6772	19.9968	20.2218	19.4982	19.6708	19.7525	19.5667	19.1818	19.2632	29.5903	47.2664	70.3337	86.5725	103.456	108.957	107.716	106.632	103.953	99.4928	97.2074	93.2727	87.0965	82.5657	78.8125	76.2713	72.646	70.7258	68.3179	64.7837	62.5117	60.7252	58.3935	56.8876
	20.2435	20.3491	19.9285	20.3325	19.6308	19.6655	19.9717	20.0088	20.1055	19.5263	19.6584	19.5982	20.6599	19.765	19.2942	18.8839	19.5605	20.0852	20.2856	19.6302	20.1357	20.5549	20.153	19.8015	19.6875	39.8502	80.8358	113.872	136.461	141.39	149.529	145.077	141.395	136.684	132.64	126.053	121.609	117.555	110.269	107.267	102.678	96.203	95.3865	89.8197	85.071	81.5071	81.6175	78.0141	73.8201
	70.8732	67.4292	63.3245	64.4617	59.5589	55.8834	55.1721	51.8206	48.5566	44.9598	41.3006	39.7331	38.5537	34.9714	30.7258	30.6433	29.6335	25.2702	22.5201	21.9144	19.5773	15.8324	16.2285	13.6702	10.5131	-8.86971	5.49839	12.2663	24.1659	33.0228	35.0622	35.3629	35.4378	34.4982	30.7175	33.0037	35.7617	30.6633	30.3592	27.973	19.6747	21.4994	22.1979	18.7641	14.3197	14.0875	11.6082	7.59215	4.7117
	10.5555	9.61921	7.19407	10.1776	7.72414	6.05835	7.29226	5.58798	3.39369	1.89771	1.05399	0.473003	0.742408	-1.02679	-3.4282	-3.39333	-3.24667	-5.6904	-7.20456	-6.64749	-6.80236	-9.69283	-9.37739	-11.5503	-13.2338	-26.6034	-23.9983	-20.7674	-15.2454	-11.3771	-12.1038	-11.5251	-9.57452	-8.52006	-10.9469	-9.41248	-8.61938	-9.69766	-8.76972	-10.2889	-13.5833	-13.9668	-15.3214	-16.7393	-17.9026	-19.4147	-22.5197	-23.527	-24.259
	12.5638	11.263	9.26337	12.2595	9.31308	7.55035	9.08167	7.79739	5.33378	3.35591	2.03174	1.42429	1.71262	-0.466413	-2.86631	-2.32121	-2.51383	-4.50511	-6.48806	-6.35628	-7.78476	-10.0217	-9.59139	-10.97	-13.8072	-26.9992	-9.00579	-2.8777	3.6102	10.4299	9.12493	12.0737	14.6164	13.0364	8.65183	10.8669	8.93288	6.01403	6.39787	5.34307	2.15729	-0.325451	-3.82415	-0.556234	-5.28416	-4.97719	-8.85457	-9.28813	-11.4976
	29.3371	28.5775	26.719	30.4406	27.994	25.6455	26.8429	25.7389	23.6588	21.8319	19.7553	20.3746	19.6043	18.0561	15.9261	15.7	15.95	13.0614	11.0248	11.6472	9.53739	6.89853	7.09315	5.24017	2.58889	-10.7154	1.94459	17.0763	31.6816	37.1424	43.1013	43.7153	42.5084	43.275	36.1787	39.3422	29.6865	29.9351	25.6518	29.2823	20.1524	20.4127	15.5525	17.1508	18.3051	14.0973	9.18807	7.88716	4.8001
	27.7293	27.6252	25.8478	29.9451	28.3408	26.1894	28.3084	27.9929	26.2571	24.6111	23.1217	22.9645	22.6142	20.4003	18.7339	18.2594	18.37	15.9859	13.7635	14.257	12.0952	10.1518	10.107	7.46387	5.52337	-12.1473	-10.642	-8.75037	-6.81081	-3.82168	-4.12221	-3.9464	-2.64859	-3.29473	-5.73523	-2.82542	-3.45972	-4.8652	-5.05058	-5.92038	-9.64631	-9.98058	-10.5895	-9.41796	-9.76841	-12.1363	-13.9832	-14.7263	-15.0557
	36.0294	33.8912	31.4331	34.2724	31.682	30.2844	31.118	30.0915	27.0024	24.9486	23.4508	22.2967	21.919	19.4619	16.2022	16.1962	15.9366	13.1285	9.97962	10.2818	8.73121	5.82215	5.29186	3.35277	0.825097	-17.5327	-16.1458	-13.3436	-11.6048	-8.02011	-8.40653	-8.93688	-6.73584	-6.89337	-8.86558	-8.26081	-9.96699	-11.9396	-10.8573	-11.606	-14.5733	-14.3567	-14.9984	-14.6515	-15.0647	-17.2615	-18.9217	-19.7521	-20.255
	22.2032	21.8605	22.8689	22.0501	22.5146	22.2647	21.6756	21.3786	21.6241	22.0976	21.7586	20.793	20.9519	21.652	21.9625	21.5312	20.2428	20.9995	21.4944	21.003	20.1321	20.9677	20.3574	20.1824	20.3471	27.7609	33.956	40.0427	44.3298	47.9398	53.0429	56.7493	62.6486	71.3085	80.9778	87.3509	92.6292	96.5441	102.297	107.781	108.511	111.294	115.279	116.987	121.637	128.667	128.013	128.083	129.348
	20.6849	20.4258	21.5398	20.7518	21.3872	21.3083	20.4332	20.274	20.7322	21.0341	20.752	19.8451	19.8058	20.5461	20.7996	20.5052	19.2602	20.1635	20.8514	20.4827	19.4742	20.2853	19.5182	19.6114	20.1017	31.2226	38.988	45.9767	51.3806	54.2412	58.887	61.3197	71.4612	88.9019	111.291	129.653	155.622	169.079	181.351	185.438	184.622	179.662	179.722	173.096	173.773	167.518	162.582	158.242	154.055
	16.392	16.0744	16.9104	16.0178	16.5624	16.474	16.377	16.0929	16.751	17.0537	16.4283	15.6503	15.6719	16.209	16.5768	16.4646	15.1049	15.8348	16.4255	16.2063	15.7283	16.957	16.2869	16.4288	16.7074	66.0207	107.636	131.039	153.496	160.511	164.139	163.106	160.42	162.19	160.133	154.716	154.198	147.468	146.173	143.261	136.381	135.865	133.003	130.089	129.893	125.626	126.698	125.973	124.09
	19.2141	18.9638	19.8871	18.8181	19.5727	19.4632	18.5095	18.6474	19.0475	19.2777	19.0268	18.2986	18.1682	19.052	19.3033	18.6908	17.66	18.629	19.2315	18.9321	18.4412	19.5049	18.6836	18.9631	19.391	59.5694	113.826	132.186	148.055	160.658	167.324	167.507	166.826	166.189	164.135	159.088	156.564	156.875	153.153	151.614	146.437	145.238	143.756	145.235	144.15	141.391	141.333	139.975	136.797
	30.673	30.5538	31.3241	30.7165	31.0618	30.5896	30.2007	30.46	31.2662	31.988	31.6342	30.9592	30.9872	32.3679	32.8307	32.1777	30.7181	31.7863	32.5232	31.7989	30.7085	31.5009	30.9754	31.2498	31.7104	159.1	204.15	230.809	242.638	240.802	235.418	227.712	221.686	225.647	225.695	220.627	221.049	216.539	213.064	214.177	207.881	204.522	200.679	197.036	195.328	194.856	189.219	184.823	182.696
	17.3257	17.2286	18.36	17.6057	18.3019	18.3171	17.5587	17.5708	17.9343	18.3697	18.1857	17.3949	17.2358	18.3246	18.5115	18.5157	16.881	17.6484	18.3402	17.8366	17.2967	18.2769	17.3817	17.2918	18.0253	39.4862	65.6119	88.8399	115.461	132.25	143.464	147.422	148.513	155.705	156.403	154.941	154.555	148.103	144.63	144.968	140.34	138.726	138.09	138.985	137.185	135.397	132.854	129.411	129.619
	25.1735	24.922	26.1401	25.4965	26.3269	26.2791	26.0656	26.0306	26.4806	26.8457	26.5138	25.1015	25.193	25.9782	25.7642	25.5977	23.993	24.9931	25.3785	24.9749	23.9265	24.6247	23.9312	24.0198	24.5852	64.0102	81.9816	107.053	139.986	162.156	187.672	190.116	195.29	202.366	204.479	201.149	199.001	196.801	197.647	196.577	190.81	191.888	190.33	185.573	181.672	176.916	170.291	168.698	172.019
	21.5368	21.1568	22.2664	21.2762	22.0074	22.2282	21.6602	21.5281	21.8265	22.4054	22.1391	21.0507	21.2448	22.0966	22.8742	22.3784	20.9435	21.8277	22.6963	22.4082	21.15	22.2802	21.5194	21.7617	22.295	41.0119	64.177	91.8671	109.712	120.38	126.817	127.799	135.01	137.931	139.353	138.559	136.756	132.15	130.877	135.112	130.536	134.377	133.213	130.607	130.708	132.127	126.413	127.902	125.469
	20.3435	19.775	20.6852	19.9821	20.5765	20.3819	19.8936	19.6544	19.9749	20.5997	20.4797	19.4964	19.4272	20.4608	20.6244	20.2607	19.0762	19.9588	20.5775	20.2613	19.4798	20.1571	19.6394	19.9341	20.4315	35.8385	45.4384	55.6708	62.1449	66.1741	70.569	71.9864	76.5089	80.6288	84.4309	86.7421	89.2719	90.87	94.0592	99.5107	100.25	104.521	107.509	109.802	112.694	115.477	116.059	117.373	119.224
	10.0123	8.74927	5.60601	8.08424	5.41849	3.55788	4.92404	3.55165	1.60193	0.397899	-1.21652	-1.90776	-1.52496	-3.4947	-6.31066	-6.3773	-6.15596	-8.16532	-9.40928	-9.58253	-10.2625	-12.7294	-12.9254	-14.1029	-16.0894	-25.8494	-21.9002	-18.2844	-14.0742	-11.7541	-12.8398	-13.3085	-11.0032	-10.1878	-13.1792	-13.3086	-14.3043	-15.8874	-17.0176	-17.6365	-19.6943	-20.5349	-21.2497	-20.1744	-20.8348	-24.098	-25.8168	-26.5214	-27.0719
	42.6022	41.7551	40.8685	46.5198	44.2579	43.3689	46.399	46.4859	45.8242	44.3876	43.2478	42.9317	44.0742	42.4694	39.4107	39.6265	39.2963	36.078	33.5693	33.2362	31.4929	28.6262	28.5495	26.7669	23.2136	18.106	52.0872	79.8126	99.9294	111.671	114.464	104.156	111.615	102.32	89.312	89.7971	81.0604	77.6748	67.6264	62.5649	53.8998	56.8726	52.1588	51.1205	49.9176	40.4215	33.2536	27.1524	26.311
	56.6232	54.7942	52.2028	56.362	54.386	51.4025	53.3656	51.7945	48.2919	47.0101	44.5226	43.754	43.4806	40.603	37.985	36.0668	36.3072	32.3809	30.324	29.6485	27.2581	24.167	23.6114	21.9701	19.6867	-0.946256	14.1051	26.1248	37.1934	43.4522	44.0529	47.6048	43.7841	39.7699	30.2958	29.7141	27.8677	22.867	21.3321	19.5023	11.4666	11.2002	11.0412	9.20372	9.42899	5.91826	0.543766	-0.143629	-2.85022
	44.9441	41.8357	37.0697	38.9487	34.6957	31.6595	30.9704	28.8588	25.0178	23.1498	20.1919	18.971	19.0133	15.9822	13.2179	12.2997	12.0302	9.33891	6.67477	6.54474	4.73554	1.64932	2.12177	-0.170528	-2.47476	-16.0417	-15.5377	-12.1243	-10.8063	-7.30725	-7.87746	-8.04559	-7.24592	-6.92114	-9.02649	-8.54986	-9.42606	-12.1865	-11.5658	-12.6872	-16.5124	-16.3281	-16.6601	-15.7603	-16.5738	-18.8944	-20.9078	-21.3566	-22.6239
	12.5971	12.4578	11.0429	14.8785	14.4916	13.2729	15.6222	14.9949	13.2997	12.4682	11.7867	12.1022	12.4271	10.7993	7.83263	7.55943	7.47676	5.74091	3.2377	4.80742	3.03266	0.719032	0.558217	-1.60461	-3.36724	-17.6628	-18.1787	-16.7487	-14.3533	-12.0885	-12.311	-11.9837	-10.2379	-10.3997	-11.6334	-11.1093	-12.1541	-14.1871	-13.3359	-13.9147	-16.5014	-16.8659	-17.1549	-16.5695	-16.5332	-17.7482	-20.4098	-21.3314	-22.0166
	31.3939	31.5964	31.1288	36.4905	35.1083	34.5236	37.4549	36.8075	35.501	34.1837	33.1186	34.3867	34.9558	33.1108	30.4772	31.0042	31.2017	28.3873	26.4139	27.4867	25.3149	23.4208	23.3608	21.3062	18.6665	-2.25767	-1.40814	-0.783108	0.628608	2.90656	1.62852	0.514124	1.87444	1.73935	-1.18202	0.412993	-0.265534	-3.1331	-2.0518	-2.92661	-5.48352	-6.13113	-7.12305	-5.75511	-6.6602	-8.42973	-10.7823	-11.4932	-11.1619
	8.98597	7.45783	5.29509	7.12079	4.88429	3.2015	4.05341	2.8551	0.311334	-1.26446	-2.91528	-3.16052	-3.37265	-4.9352	-7.87915	-7.97925	-8.39945	-11.1928	-12.595	-13.0082	-14.8125	-17.6205	-17.4622	-19.3054	-21.3814	-39.2199	-37.7464	-36.3756	-33.9418	-32.1449	-32.7513	-32.9142	-32.6498	-33.3753	-35.9088	-34.7481	-34.0215	-36.2761	-35.8717	-36.6042	-38.9663	-39.1417	-39.1425	-37.6512	-38.4668	-39.7983	-41.9366	-42.2532	-42.7207
IKO 3	55.3788	54.7334	52.6376	57.4493	54.2608	52.5212	53.7383	51.7939	49.2131	47.0063	44.5875	43.7592	42.5182	40.0081	36.1701	35.8752	35.7454	31.7162	28.3892	27.7546	25.3195	21.5598	20.632	18.1167	14.6405	-10.6698	-6.40655	-3.41571	-0.567774	1.76456	-0.215609	-1.32227	-1.0063	-1.92341	-4.52265	-4.12433	-5.89063	-8.79691	-7.94928	-10.308	-12.8927	-14.6662	-14.6883	-14.617	-15.9467	-17.655	-19.9356	-21.0707	-21.4244
	20.484	19.1763	17.3684	21.1464	18.7856	16.6548	17.9525	17.0425	15.225	13.6323	12.4479	12.2746	12.0519	11.0442	8.35614	8.1775	7.7902	5.15773	3.49769	3.22203	1.20787	-1.14917	-0.795813	-2.51717	-4.92431	-18.2161	-1.75695	5.80893	15.5938	22.0301	19.1159	18.9497	21.4841	22.62	16.6019	15.2457	14.4187	10.9161	11.2301	9.19835	3.80744	4.68182	-0.582172	0.096158	-1.94716	-5.77892	-10.8608	-9.20168	-10.2467
	16.9464	15.7879	13.7369	17.1459	14.5089	12.1017	12.8193	12.045	9.21848	7.75028	6.02862	5.62283	6.07838	4.67923	2.88083	2.43843	3.27199	0.603221	-0.969462	-0.0206335	-1.87012	-3.94448	-3.71074	-5.1323	-7.32489	-19.0889	-16.0806	-12.6384	-9.6082	-7.1413	-7.62325	-6.93711	-7.2073	-4.75273	-6.61509	-6.7039	-7.06351	-10.9012	-9.49897	-10.6897	-13.1957	-13.7895	-14.172	-13.1162	-15.0231	-17.6056	-20.0313	-19.7675	-20.4714
	9.84282	8.16193	5.84489	8.76767	6.82279	4.55262	6.55384	5.35106	3.15342	1.6872	0.367516	0.272702	0.0462966	-1.94628	-4.13317	-3.87034	-3.39881	-5.19704	-6.82683	-6.01961	-7.71644	-9.37241	-8.76143	-10.3482	-13.13	-19.5231	3.61822	17.0266	39.1618	42.9102	45.8741	46.114	50.002	50.895	49.0698	47.9501	47.2221	35.5031	34.4676	35.1488	29.9933	25.2653	19.9373	19.3367	17.1789	10.4592	4.95547	3.18973	0.779921
	3.37037	3.10651	1.6084	4.76267	3.88584	2.35813	4.68814	4.04455	2.27481	1.68564	-0.617743	-0.176761	0.98637	-0.184492	-2.71694	-1.91925	-2.12335	-3.97174	-5.62114	-5.07892	-6.18818	-8.04731	-8.10617	-9.37622	-11.4402	-19.9476	-10.0207	3.98894	13.1227	21.5286	29.0431	32.4662	35.3586	37.9851	32.3583	36.3934	33.4369	25.4478	27.2416	27.3059	20.6666	18.7825	13.9178	17.9074	9.71684	7.55879	3.58391	1.13178	-2.71366
	77.3143	75.6349	72.9359	76.4009	73.0757	69.9029	69.1908	66.9653	62.842	59.873	56.668	55.3659	53.9816	49.4577	45.7406	44.3032	42.9952	38.6369	34.8946	34.248	30.4655	27.2503	25.7333	23.2097	19.574	-6.05373	4.2482	20.977	40.3813	48.0989	55.1366	55.7377	63.4814	58.959	49.8415	53.0797	45.1343	39.4923	41.3348	42.2483	34.062	30.977	30.283	29.7405	26.2485	22.3423	15.9641	14.6749	8.488
	79.8528	76.3253	71.224	73.3829	68.6091	63.5332	62.5753	60.4925	55.4416	50.802	47.1065	45.4662	43.6205	40.1757	35.7307	34.3013	33.5148	28.9998	26.0475	24.6679	21.6336	17.9127	17.1586	14.3789	10.064	-11.3866	-5.27779	6.4979	16.0855	22.0316	25.4685	21.3304	23.0862	21.0234	17.1028	18.5122	15.2651	8.58783	7.99428	5.56569	1.02697	-0.171144	-1.61533	-2.12086	-4.50712	-8.97373	-11.1684	-14.3943	-15.8587
	8.52252	9.14546	8.66264	13.9302	13.3096	12.0881	15.4452	14.9358	13.7783	13.6321	14.354	15.5729	17.713	18.0352	15.9302	14.6782	15.7135	12.4475	11.194	11.1242	8.79886	7.51273	7.24604	6.42468	5.13146	-7.4465	-0.107808	4.88565	9.69197	14.6525	15.0641	17.0696	20.9279	20.6381	22.499	22.6698	22.2988	19.7848	20.9754	20.5928	19.8374	19.2806	17.0317	15.9126	12.5825	9.20326	3.88113	5.459	0.202636
	33.4682	33.3791	32.2093	36.2023	34.2572	33.9152	35.89	36.0421	34.2682	34.0677	33.7314	34.4208	35.3519	34.8744	32.7463	33.9056	34.9084	33.3085	32.2217	33.3866	32.8095	30.7823	31.8479	30.2461	29.0877	31.0707	47.8566	66.2862	80.0516	92.6662	98.5092	97.0043	102.398	103.255	101.008	102.524	96.9907	96.54	92.326	89.6109	82.0881	80.5696	78.1487	78.9488	77.8319	70.186	62.1581	59.0622	57.328
	21.8942	21.1686	19.2927	22.4269	20.3006	18.9299	20.3646	19.8242	18.7137	17.2799	15.412	16.5772	16.6736	15.0579	13.0486	14.1141	14.65	12.9014	11.2804	12.2881	11.0825	8.50782	9.05658	8.01356	5.63405	-2.53195	14.8453	38.2728	56.7199	81.2511	89.905	87.5233	95.9468	100.483	102.42	103.906	100.515	96.9083	95.5271	90.619	80.0854	79.8841	71.5779	73.8803	70.4385	64.0969	54.644	50.148	46.704
	46.2785	42.6616	38.3833	39.6704	34.9162	30.7257	30.9664	27.7331	23.7761	21.7413	19.05	17.5421	16.3588	13.8492	10.9229	10.7694	9.92546	6.47818	3.9466	3.75803	1.30831	-1.08274	-1.38646	-2.88506	-5.29256	-22.3412	-19.3841	-15.8956	-10.9319	-4.2428	-4.23864	-6.29333	-1.49714	0.393159	-4.22526	-3.57185	-4.72638	-7.59053	-7.24678	-8.39864	-11.6285	-13.6239	-16.7547	-15.7769	-16.6528	-20.0218	-21.7392	-21.2237	-20.2386
	45.644	44.7068	42.3429	46.4214	44.3066	41.3791	43.1821	42.1754	39.2633	38.313	37.1638	35.9996	36.5498	34.9764	32.1895	33.2435	33.2366	29.9919	28.4473	28.8607	27.1036	24.884	25.5009	23.5944	21.496	10.9318	18.6385	25.5617	34.8034	42.753	46.1638	46.5724	52.3343	52.9171	51.2935	49.7329	49.6985	45.9423	51.7043	51.1331	42.6206	39.0176	38.4824	37.7605	33.3627	33.5929	27.8414	26.9991	24.8935
	20.9895	20.7024	21.1633	20.1949	20.9297	20.7981	20.1952	19.7385	20.1679	20.4164	20.3189	19.1101	19.4553	20.3132	20.5396	20.5767	19.1726	19.8951	20.528	20.4096	19.0934	20.0248	19.4954	19.6685	20.1091	24.4055	29.4625	40.238	56.1309	76.3112	94.2661	109.217	121.974	130.152	137.646	143.564	147.829	149.342	151.831	154.976	153.035	154.063	152.852	151.985	152.715	152.33	148.55	149.633	148.844
	19.342	18.7354	19.6861	18.904	19.7252	19.6528	19.0696	18.9553	19.4446	19.9892	19.6647	18.6444	18.9987	19.85	20.1782	19.8611	18.4501	19.1613	19.8949	19.7336	18.6555	19.4702	18.9891	19.0222	19.3966	21.0445	23.5791	29.0006	33.1301	41.5096	48.2068	55.4371	64.2827	75.2202	84.6903	94.142	101.936	110.868	121.269	129.092	132.812	137.237	140.033	141.002	145.225	144.069	141.88	140.211	139.938
	23.2202	22.7731	24.045	23.2838	23.8043	23.8022	23.4596	23.3014	23.9121	24.1959	24.1676	23.2211	23.3462	24.1455	24.434	23.845	22.5503	23.4699	24.0586	23.6232	22.8523	23.405	22.924	22.8835	23.1792	80.4807	124.596	152.722	174.041	183.027	190.731	190.168	186.469	186.77	190.579	185.498	187.496	183.186	179.941	177.744	176.798	177.44	176.507	174.402	171.292	171.635	166.389	164.946	162.706
	19.11	18.9602	19.776	18.6705	19.3549	19.1443	18.4776	18.6337	18.9111	19.5395	19.4683	18.4323	18.7076	19.16	19.4296	19.1448	17.6586	18.7439	19.6995	19.2698	18.5908	19.3196	18.5804	18.9024	19.3624	175.366	209.964	223.67	229.739	234.282	237.226	238.663	236.325	234.59	228.01	217.846	213.805	208.057	208.248	206.725	198.729	194.538	190.766	188.038	184.653	182.173	176.213	175.533	173.008
	23.2647	22.732	23.836	22.8445	23.5363	23.1375	22.7672	22.5708	22.8461	23.766	23.1838	22.3507	22.6836	23.3894	23.6922	23.0053	22.0268	22.4675	23.4529	22.9061	21.8568	22.4453	22.124	22.015	22.6313	37.9543	41.8943	45.7501	49.1683	51.7682	56.0327	58.7026	62.1035	66.0209	71.3313	75.0056	78.5575	82.6841	88.765	96.0329	99.279	107.215	115.594	119.426	125.972	128.764	132.101	135.425	138.184
	20.1062	19.7913	20.8479	20.1051	21.0083	21.0848	20.3156	20.322	20.3914	21.1729	20.8762	19.8972	19.956	20.7779	21.2624	21.0323	20.0725	20.9243	21.4965	21.176	20.0425	21.0013	20.1187	20.2197	20.967	50.0207	84.2233	115.747	133.715	145.872	157.175	162.942	160.677	164.872	168.707	165.763	164.43	163.293	160.901	161.47	158.862	154.428	157.761	153.941	153.934	153.481	150.336	149.403	147.066
	25.5288	25.0818	26.2608	25.4739	26.1738	25.825	25.334	25.4052	25.9729	26.4167	26.0691	25.4388	25.3599	26.1443	26.2866	26.2216	25.132	25.7259	26.4237	25.8336	24.8874	25.7595	25.2495	25.5973	25.7998	40.5746	51.4446	76.5407	95.2793	108.853	121.991	133.245	143.926	151.973	159.792	157.488	161.734	162.926	164.522	167.168	161.951	163.949	162.959	160.05	161.417	161.485	156.875	155.926	158.551
	18.9328	18.6979	19.6789	18.5718	19.6465	19.3228	18.6381	18.6588	19.147	19.3342	19.2015	18.3722	18.1966	19.3351	19.3802	19.2545	18.0212	18.9918	19.5526	19.2422	18.4002	19.1971	18.7363	18.6698	19.1124	39.3836	56.4717	86.3268	115.08	131.479	146.486	150.434	155.73	159.224	162.931	162.957	162.423	159.019	155.367	156.604	150.234	149.258	147.831	144.213	145.39	143.16	143.046	138.476	135.469
	20.9672	20.7318	21.9113	20.8602	21.6793	21.4825	21.0608	20.8147	21.5851	22.1089	21.912	21.1711	21.0962	22.0381	22.3299	21.8859	20.4587	21.5893	22.2299	21.7613	21.0517	21.641	21.1289	21.3078	21.8065	63.1201	84.6595	104.871	129.722	139.562	147.698	153.757	160.165	162.259	162.321	159.86	158.472	153.246	152.685	153.627	147.051	146.14	144.903	138.469	137.952	135.29	130.52	128.241	126.879
	20.1374	19.9701	21.0203	20.0829	20.8865	20.4115	19.8735	19.9309	20.2408	20.4908	20.3919	19.3328	19.1195	19.9325	20.2693	20.1675	18.7865	19.7079	20.3595	20.2786	19.1628	19.9648	19.4346	19.1826	19.7241	194.914	240.427	247.367	239.774	224.441	214.418	205.48	202.353	196.767	195.699	194.121	183.326	173.738	177.724	179.683	169.641	175.084	169.107	163.664	162.071	155.138	152.304	146.789	148.221
	21.1533	20.9359	22.1605	20.6293	21.6603	21.2209	20.6551	20.518	20.9442	21.3272	21.3377	20.2369	20.3964	21.2982	21.4844	21.2675	20.3184	20.9583	21.45	21.0934	20.1312	21.0117	20.2028	20.1999	20.6241	190.309	216.124	229.353	237.072	241.624	246.61	245.441	245.984	244.903	245.437	239.497	234.02	229.975	227.671	228.601	221.015	217.415	214.358	208.726	206.343	200.801	193.367	189.313	188.166
	18.2151	18.0806	18.9823	18.2042	19.0655	18.7437	17.9906	18.0244	18.2064	19.1191	18.5424	17.542	17.5319	18.4662	18.7182	18.306	17.3539	18.0328	18.5292	18.2664	17.7826	18.4073	17.9203	17.7865	18.4045	152.061	197.804	214.789	217.269	205.89	198.169	188.264	186.702	184.229	180.287	179.596	167.627	165.194	163.102	160.059	152.989	159.444	154.578	149.479	148.513	144.764	141.285	140.803	138.544
	19.152	19.0242	19.8334	18.594	19.579	19.4869	18.9536	18.9559	19.1821	20.1308	19.551	18.608	19.1561	20.0117	20.0653	20.1008	19.115	20.0754	20.915	20.2595	19.5356	20.4433	19.9475	20.2313	20.5639	31.2345	36.2136	40.1289	44.8111	47.1059	50.6141	52.2378	54.0883	56.5045	60.4067	61.7542	64.1036	65.9575	69.5039	74.0874	74.2236	77.5885	80.9792	82.3946	86.3604	89.318	90.0936	92.6493	95.0771
Time (s)	0	2	4	6	8	10	12	14	16	18	20	22	24	26	28	30	32	34	36	38	40	42	44	46	48	50	52	54	56	58	60	62	64	66	68	70	72	74	76	78	80	82	84	86	88	90	92	94	96
[truncated: 51 more columns]

## Sheet: Panel P
WT	12.6699	13.4954	13.0629	13.2014	12.6031	13.533	13.9294	14.3589	14.3342	13.3716	13.3888	14.0149	14.3978	15.0453	14.6793	13.7951	14.8585	15.1001	14.8657	14.286	13.9272	14.3966	14.2911	15.7618	14.8277	15.0954	17.4111	19.1005	21.0279	23.4399	26.6943	28.8519	30.9191	32.5729	36.7658	37.7492	42.652	44.3029	45.5501	48.5673	51.047	53.203	54.4039	56.8439	59.302	62.2104	64.6284	67.6036	70.5107
	57.3563	58.1319	56.8236	56.6051	55.8903	56.6778	58.8533	59.1506	58.6233	55.8287	61.6122	60.3366	59.5554	62.0727	60.1989	60.032	61.3379	63.3155	61.3217	59.1842	59.3516	61.1792	61.8838	62.1724	59.734	59.8232	61.6877	62.831	66.5573	67.5597	70.2731	72.9698	75.807	79.1781	85.3297	88.6854	93.8203	98.6874	102.062	108.906	117.292	120.861	124.435	128.785	131.191	138.139	144.194	150.322	156.606
	39.2833	40.1514	40.1822	40.02	39.1631	40.4686	41.4123	41.9399	40.6204	40.3889	40.4589	40.9733	42.7636	43.965	45.8417	47.3875	50.0232	51.3527	50.3575	47.8402	47.0749	46.9333	45.8798	46.6298	45.6928	45.6023	46.0722	47.9535	48.1651	49.8145	52.0751	53.3524	54.6463	55.8528	59.4665	60.1982	64.061	65.2658	67.3701	69.8402	72.0381	73.9795	73.6948	77.1442	78.8864	80.4582	83.3882	86.7175	88.7002
	30.2965	30.4924	30.106	30.6567	29.6549	30.9982	30.6583	32.0298	31.1271	29.9692	30.0074	30.4438	31.5356	31.1518	30.2269	29.4277	30.052	30.7805	30.2064	29.756	29.5289	29.5564	29.2465	30.826	30.3161	31.827	34.1916	35.5585	37.0879	39.4548	43.3159	45.7465	47.936	50.861	53.9578	56.5198	62.8201	66.0061	68.9056	74.5243	76.8996	79.4495	81.7455	84.8809	86.0625	86.7908	89.572	93.8947	97.6959
	9.49766	10.6113	10.1094	10.4644	9.70324	10.8735	11.3996	11.2448	10.996	9.81868	9.83886	10.7086	11.06	11.9499	11.1279	10.9329	11.4493	11.5682	11.2709	10.3115	10.4837	10.7333	10.4659	11.202	11.0836	11.1957	11.7954	14.3614	15.3054	16.8111	18.454	20.3365	21.8792	22.4806	26.3903	27.0163	30.5663	34.0304	35.1073	38.9168	42.3688	44.6302	48.3212	52.7941	56.5782	59.2453	63.0984	66.8268	69.8318
	35.91	36.9523	36.0571	36.597	35.8351	36.9251	37.5272	37.7597	36.8863	37.1363	36.6346	37.8166	37.9253	38.3137	37.4533	37.0883	37.9172	38.2863	38.8517	37.4552	38.5981	38.8504	42.4661	41.9935	41.2325	39.5447	40.6677	42.9724	45.8164	49.1419	52.5753	56.011	58.3393	61.7679	67.6827	70.9855	78.8777	81.9593	85.2693	88.2635	94.1663	97.4581	97.9603	101.244	106.016	108.464	112.376	115.049	118.28
	17.7199	18.2636	17.8002	17.7655	16.8035	18.5046	18.7658	18.7016	18.2075	18.0994	17.9168	18.9081	19.2755	19.2076	18.6006	18.282	18.8214	18.6617	18.8715	18.4354	18.8301	19.2349	20.9384	21.6451	20.5413	19.4063	20.5496	22.0141	23.6806	27.3535	30.832	33.7473	36.1131	39.9464	46.4292	48.2912	55.7266	59.2153	62.0709	66.4728	71.4429	73.0468	74.5804	78.3407	82.7146	84.296	87.646	91.027	94.6306
	12.9108	13.5498	13.1402	13.3599	12.9472	14.0958	14.1379	14.5174	13.4881	12.7238	12.7106	13.1648	14.7153	14.7146	15.0962	14.8494	16.0516	15.9606	16.3797	16.0837	15.9044	15.3318	15.3808	15.945	14.8539	13.2993	14.1991	15.7118	17.0383	20.1723	23.3782	26.0384	28.4988	30.7582	35.6722	37.4867	43.1997	46.2393	49.1574	54.2352	58.9483	61.921	63.4996	68.7087	71.7829	73.7077	75.2579	80.0383	82.0657
	37.7322	38.1658	38.4911	37.4287	37.7229	40.9213	43.5512	42.2641	40.3134	38.6261	40.4232	41.4399	42.6942	41.5952	40.7354	39.4978	39.9806	44.8759	43.7626	42.5073	41.5805	43.1793	42.8063	44.4336	48.0753	42.2673	44.1612	46.8458	54.4016	65.7267	72.514	81.9083	89.2753	93.1769	100.952	103.884	115.136	119.842	122.782	130.003	135.806	139.633	136.811	140.722	143.359	147.137	147.132	149.191	150.984
	30.23	31.1718	31.3601	30.8836	30.0998	31.5188	32.613	32.8821	31.7669	30.7408	31.7771	31.0788	31.7089	32.4755	31.0386	31.5694	32.2567	33.1491	33.0336	31.7895	32.4913	33.486	33.3113	34.3239	33.2909	33.5933	35.196	37.1521	39.2996	43.8545	47.2875	51.7141	54.9611	57.7003	65.9626	67.2894	73.38	79.2077	83.8625	93.5041	98.5008	103.295	103.875	109.88	115.183	123.258	127.599	135.751	142.191
	34.0127	34.9862	36.4735	37.0948	35.1673	36.6039	37.7288	38.1349	36.2587	34.1737	33.1818	33.176	33.0579	36.7579	34.8699	33.8174	34.0302	33.5667	33.3458	32.5036	33.6013	33.2108	33.5323	34.3679	33.3235	33.1601	36.5188	38.9191	41.2396	49.0817	51.535	56.3959	61.3184	65.5381	72.5002	78.6081	88.0112	94.8458	97.0003	103.484	108.049	112.116	113.945	118.759	122.733	127.21	127.199	127.402	131.084
	29.7559	31.1922	30.7954	31.3385	30.2846	31.6892	32.5661	32.0687	30.9824	29.2108	31.217	30.5303	30.3465	29.7023	29.582	28.6718	29.6373	29.4228	29.1517	28.7182	28.278	28.7452	29.1958	29.2723	28.4091	27.9437	29.6569	31.5218	32.629	37.0677	41.0183	44.8186	47.4616	50.1443	55.9286	58.6574	63.5836	65.4761	66.729	71.2084	75.5958	76.9848	78.2669	81.3853	84.0381	85.9053	88.7423	92.3632	95.6843
	41.3033	43.7274	42.8075	43.0604	41.4612	42.5154	43.6265	42.9599	41.9719	41.8906	43.91	43.6197	43.2244	43.4602	42.6087	42.3369	44.0386	43.9346	42.8544	42.0022	41.9608	42.3927	43.2012	44.0851	42.144	39.6963	40.7032	44.1584	46.1628	51.5259	54.9452	57.713	60.0912	64.34	70.2041	73.2783	80.9335	84.9785	89.7524	96.699	106.991	108.951	109.123	116.002	120.522	123.001	125.493	129.009	131.911
	19.5546	20.8272	20.1804	20.8686	20.3294	22.1627	23.7359	23.8179	22.4813	21.0211	20.3176	20.2587	20.3553	20.3582	20.2428	19.7927	20.5228	21.7537	21.0522	19.9055	19.8005	19.6094	19.6787	20.8494	20.7666	20.531	22.3347	23.9392	25.5044	28.4021	31.9219	34.4767	36.9992	39.0348	43.8277	46.153	51.4865	53.8229	55.3178	59.3069	63.1352	66.3842	67.0992	70.4051	72.7327	75.1113	78.0957	81.544	84.2147
	26.4516	28.0337	27.6177	27.8869	26.9442	28.192	28.8772	29.0996	28.6781	28.0907	27.7988	28.5391	29.0074	29.458	28.7528	28.2587	29.2995	30.0177	29.8693	28.9678	28.7671	28.7645	28.8486	29.9255	30.1121	31.1558	32.0075	33.5385	35.247	36.618	39.7612	42.0144	43.1936	45.725	50.4164	52.0716	58.5778	62.6113	65.2425	68.8396	74.5863	79.8188	83.4849	89.8075	94.419	98.3137	102.302	106.472	111.038
	35.1505	35.8169	39.1889	38.5897	37.8206	38.7678	38.5073	39.3293	38.531	37.0753	37.3971	38.9784	40.1449	40.5209	39.8078	40.3849	41.7057	41.8791	40.8377	39.955	39.3074	39.6671	40.5871	40.5124	40.6766	39.1486	42.3222	45.3121	46.8005	51.3097	56.0346	58.7695	62.3877	69.7685	77.9827	83.9855	91.2198	94.9681	99.3963	107.324	115.018	120.382	123.815	130.203	133.935	137.863	141.336	149.184	153.225
	16.4715	16.6275	16.9228	17.9143	17.2896	17.7741	18.172	17.3096	17.9987	18.5546	17.6583	18.3185	17.3665	19.1736	17.181	16.5998	19.5612	20.7393	20.3095	18.6302	17.3858	17.4987	19.7726	19.0291	18.4046	17.5388	17.7977	18.1473	21.5722	22.8282	26.8222	28.0087	28.3249	31.4415	33.4679	36.3565	43.2166	45.7897	48.188	52.1857	60.3189	62.768	65.3125	70.3826	74.3055	77.9207	81.0798	87.219	90.0233
	26.4151	28.2827	28.9099	28.0817	26.4711	28.495	28.7872	26.8733	26.2861	25.7754	23.727	24.1994	23.2223	23.3437	23.6263	21.956	23.3519	23.4938	22.1653	20.6995	20.361	20.5707	21.3995	21.1999	20.7994	17.2475	18.0975	19.6109	21.3159	24.8085	27.7395	30.8721	33.3826	34.8255	40.3659	43.8501	50.2637	53.7932	55.4742	59.1278	61.8945	65.3289	65.7456	69.6595	71.9293	72.8815	74.7308	77.4156	78.6509
	32.3799	34.9807	34.9434	34.4773	33.0916	35.5677	34.9808	33.7608	32.0319	32.1439	31.1338	30.5244	29.3278	28.8592	27.6325	26.8328	29.2214	28.2081	27.5495	26.5215	25.4466	26.442	30.1834	29.3246	28.7305	26.3557	28.2549	30.9786	35.1063	39.1955	44.0065	50.2844	54.0626	55.3779	60.6354	62.4477	68.7922	71.783	74.7767	79.5945	83.6418	86.0062	87.0957	92.1419	94.4047	95.6987	96.7549	99.9699	101.17
	25.8556	27.026	26.8977	27.315	26.8383	28.5665	29.2136	29.1827	28.3724	27.0566	27.4994	27.696	28.369	29.1475	28.1426	27.7855	28.0593	28.9548	28.6666	27.6118	27.0394	27.6872	27.5245	28.3732	28.4077	29.0051	31.6821	34.4254	36.9182	40.258	43.5863	47.2019	50.3205	52.6685	57.7315	59.5713	65.5712	67.48	70.8787	75.0669	79.312	83.4451	84.931	88.9785	92.4641	95.0164	99.3257	101.999	106.23
	37.0127	37.0548	36.6808	36.6184	35.9592	39.298	40.8331	39.0183	38.1245	37.2217	36.727	38.0922	38.1073	37.655	38.9024	36.8886	37.7973	37.9895	37.8344	36.6183	36.2163	36.4795	35.9244	36.729	35.9695	37.102	38.3456	40.2915	43.115	45.1571	50.4248	53.6876	58.4323	61.7505	69.9173	73.3262	80.2455	83.5631	85.5012	92.4784	99.7021	104.216	107.894	113.54	117.307	120.655	125.129	127.591	131.153
	35.9243	36.695	37.2532	36.5253	35.3932	37.7147	37.5389	38.0488	36.5249	36.2669	36.0971	36.5691	36.0319	36.4936	35.3183	34.7221	36.4817	37.4277	37.4571	35.9621	36.6937	36.7438	37.8222	38.0548	37.1379	38.3962	40.4035	41.5108	43.2926	46.9918	50.0007	54.7733	60.5619	68.3201	77.8868	80.7434	87.6317	88.8875	91.2888	98.0488	101.786	107.4	109.924	114.607	118.414	120.304	124.001	128.205	133.763
	20.5448	21.2976	20.6638	20.4896	19.844	20.8707	21.3571	21.7258	21.234	20.5664	20.5906	20.9686	21.6393	21.9668	21.3522	21.0225	21.9365	22.0607	22.5169	21.6493	21.8308	22.0009	22.2962	23.8932	23.235	24.4818	26.1194	28.1556	29.6202	32.5182	35.0341	37.7594	39.2738	41.0547	45.269	46.0337	50.2239	51.9394	53.4855	56.4178	59.1571	61.7456	62.3168	65.293	67.447	69.2797	71.3819	74.5396	77.494
	43.1233	43.4275	42.2802	42.0468	41.3179	42.5849	42.3843	42.7472	41.3485	40.4339	40.6056	40.9605	41.2222	41.2987	41.3092	40.8172	42.2313	42.2773	42.4007	41.3115	42.3001	42.2485	42.3193	43.4671	42.2343	45.459	45.4884	48.1826	49.152	52.3329	54.9373	58.7827	60.5026	66.8352	71.3653	74.4021	81.6258	85.7969	86.481	93.0128	99.7016	105.887	108.554	112.641	115.389	117.786	122.52	125.32	128.133
	8.59221	9.05218	8.63255	8.17838	8.07697	9.1428	9.70338	9.55333	8.82117	8.37008	8.10506	8.74929	9.07108	9.28757	8.88523	8.69237	9.23166	9.62947	9.72797	8.97572	8.95178	9.04147	9.1294	10.162	9.63851	9.64876	11.4255	13.4393	14.9816	17.4896	21.539	24.6117	26.5011	27.9516	32.0661	34.0974	38.3256	40.8172	43.2522	47.2014	53.0758	58.3219	62.3707	67.7263	71.4991	74.074	79.3435	84.179	89.5836
	35.3768	37.1641	36.067	35.6099	35.2892	38.2843	37.3015	36.9151	35.7743	34.4445	33.5707	35.4101	35.858	38.6582	37.2348	36.7091	36.3612	38.188	39.3839	38.7	37.9443	37.6508	36.2329	35.844	35.3589	36.6138	37.6923	39.8474	43.8308	51.3483	57.4341	62.5237	68.7877	74.3862	81.6706	86.8396	95.6462	103.682	105.261	113.71	118.709	123.859	128.02	134.993	138.303	142.468	147.08	151.381	153.578
	33.006	34.1585	33.4558	33.3231	32.941	34.8092	34.8766	34.4897	34.8988	34.3492	33.2318	33.6538	36.0986	36.6771	38.5181	38.2449	40.0898	39.9728	42.6897	40.5241	39.7126	38.9505	38.0663	39.506	38.0158	38.4109	40.643	42.1857	47.0938	51.3582	59.3792	62.4245	67.1954	71.4923	77.5315	79.5796	87.8951	92.6479	96.1856	103.216	111.154	115.311	117.119	121.527	124.77	126.987	130.463	132.746	135.291
	20.8741	22.3352	21.0124	21.1098	20.5472	21.7349	22.3291	21.9072	21.1602	20.8559	20.6491	21.2259	21.5566	21.7497	20.7699	20.67	22.1398	22.249	22.1597	21.0985	21.0484	20.8792	21.0358	21.4637	20.8856	20.0646	21.3767	22.8928	23.4617	25.7961	28.004	29.6014	31.3616	32.9695	36.7089	39.1275	42.643	44.4346	46.223	48.9657	52.5809	54.6884	56.3999	59.7319	62.5445	66.39	70.7462	75.0503	77.5899
	37.4363	38.3781	38.0119	37.2716	37.01	38.4236	39.39	38.8373	38.5055	37.0927	37.1651	37.6363	38.1175	38.8635	37.8957	37.3758	38.8561	38.9432	39.2639	38.0731	38.5205	38.5091	38.1862	38.9064	39.2315	41.8829	43.5619	45.9294	48.048	51.2089	54.4864	58.3988	62.2936	65.9446	71.351	75.7797	82.8183	87.7123	90.3558	97.2494	102.583	108.41	111.864	115.969	119.021	122.692	125.173	129.021	131.988
	25.9182	26.8195	26.1369	26.2989	25.5849	26.8371	27.8552	27.7231	28.1094	26.9937	26.8557	27.2379	28.4462	28.0993	27.9516	26.8865	28.2135	27.3006	27.0671	25.9128	25.9761	26.5723	26.136	27.3757	26.5519	26.6995	28.4945	30.7237	33.7319	37.311	42.8808	47.0221	51.3695	55.3139	61.7403	70.3512	81.7151	86.2443	90.4013	96.1796	104.322	110.243	114.423	120.856	128.026	132.451	139.015	146.404	154.889
	22.2007	23.032	22.5896	22.6794	21.9437	23.0822	23.223	23.2638	22.7487	21.6192	21.2984	22.4625	22.4907	23.06	23.4026	22.7957	23.5498	24.0266	24.7238	24.3663	24.1901	24.1658	23.9448	24.6858	24.1349	23.0429	24.7164	26.6848	28.4343	32.0108	34.0897	38.0997	40.3988	43.7591	49.3055	51.6857	58.8466	63.003	66.5973	73.5727	77.754	85.3646	88.0046	93.3388	99.0042	105.224	109.518	114.775	118.829
	28.0213	28.9342	28.644	28.9792	27.9697	28.9213	29.2435	29.728	29.2859	27.9502	27.8956	28.5594	29.1138	29.1154	28.9322	28.9826	29.71	29.6709	29.6714	28.4988	28.632	28.4735	28.5865	29.2837	28.8552	28.8956	29.8447	32.1507	34.0578	36.5624	39.1931	41.9601	44.2469	46.3742	50.0054	51.5893	56.0687	58.0034	59.754	64.1691	67.5356	69.9652	70.4979	74.5163	76.6792	78.7656	81.3366	83.2939	86.2918
	45.4207	44.6792	45.6959	45.4483	45.3764	43.8856	44.8197	46.3237	46.1807	44.8674	44.5014	46.3428	47.116	45.7248	46.376	46.014	46.2741	46.8662	47.0248	46.0128	46.9695	46.6975	47.1338	46.5823	46.4318	46.6649	49.1381	50.4259	51.6702	55.1577	58.9067	61.3304	63.9037	67.8401	70.3452	75.6741	77.8603	80.9907	81.7264	84.4359	88.0321	90.4909	94.0367	95.873	98.4975	101.606	104.392	105.914	108.02
	40.9395	40.509	41.1848	41.6746	41.4593	39.9498	40.9009	42.2516	41.4621	40.5681	40.472	41.0801	41.5888	40.3842	40.76	40.0207	40.8207	41.4334	41.3411	39.9117	40.8297	40.5026	39.9288	39.9793	39.5644	39.7689	41.9801	41.9773	44.3229	46.6794	49.5289	52.3109	54.5674	57.6636	60.0189	64.5569	67.7322	72.1954	75.2674	77.1179	82.089	86.7699	93.3467	95.6329	100.305	103.41	106.169	108.163	114.224
	12.258	12.1133	13.068	14.0524	13.2481	12.576	12.7403	13.9951	13.6391	12.9978	12.9188	13.9302	14.4492	13.4132	13.944	13.619	14.3402	14.9078	14.9167	13.8904	14.3129	14.6441	14.1337	14.0436	14.3716	15.3683	16.5825	16.2636	16.6923	17.6368	19.2544	20.6822	22.5513	24.0664	24.4568	26.7682	28.6469	30.2033	31.0657	32.1579	34.1621	35.43	37.8296	38.6345	39.9252	41.2603	43.5626	44.6414	46.4612
	35.0271	34.423	35.1658	35.7448	35.19	34.7907	34.8566	35.3686	35.1206	34.2382	34.4758	35.6379	36.1687	35.6351	35.8399	35.3756	35.9669	36.0125	36.4077	34.9326	35.6986	36.4999	35.6952	35.606	36.105	35.9435	37.8698	38.0884	39.4361	42.0987	44.0443	46.8902	49.139	51.726	53.4777	58.656	61.7544	64.3171	65.6786	67.3543	72.1483	77.5941	81.17	83.5572	86.8101	92.798	95.5565	98.3478	102.26
	16.368	16.3055	17.1102	18.1409	17.4922	16.7761	17.3914	18.4706	18.2254	17.3541	17.1787	18.1781	19.0485	17.8161	18.3915	18.3195	18.6407	19.1972	19.2961	18.584	19.2921	19.42	18.9133	18.983	19.4208	21.6184	23.2292	23.3558	24.3135	26.3073	28.5304	29.6216	31.6876	33.5245	34.0079	37.0288	38.9387	40.1033	40.7103	42.4353	44.6397	46.1871	48.8527	48.8143	50.3335	51.6854	53.2631	54.3254	56.1805
	13.1621	12.8343	13.5639	15.1675	14.1691	13.2491	13.4097	14.4943	14.0899	13.4099	13.4275	14.5411	15.577	14.3074	15.1617	15.3887	15.7985	16.5485	16.7193	15.7564	16.1804	16.2155	15.6175	15.3404	15.8034	15.9812	18.0355	18.4391	19.6446	22.1977	25.0637	27.2635	30.3954	33.1441	34.3059	37.7059	40.3601	42.5202	43.321	45.3559	47.8083	49.732	52.4578	53.4341	55.0792	57.0039	58.9235	60.8475	63.1473
	13.2226	13.2086	14.0177	14.8748	14.1794	13.7355	13.7401	15.2588	15.0822	14.2841	14.4262	15.0658	15.7546	14.5425	14.7133	14.5892	14.923	15.0271	15.4069	14.4115	15.2342	15.1955	14.8751	14.6706	15.3848	15.8503	17.5849	17.8106	18.6027	20.5631	22.3339	23.9917	25.7477	27.536	28.1782	30.6537	32.1783	33.8592	34.0726	35.0613	37.1195	38.1239	40.4286	41.193	42.3057	43.656	45.8776	46.707	48.5691
	12.5866	12.1447	13.217	14.3261	14.0526	13.6006	13.3634	14.4713	14.2412	13.3839	13.7202	15.1598	15.9812	14.5251	15.2148	14.5888	14.9956	15.346	15.2275	14.4216	15.3781	15.6777	14.9175	14.9608	15.277	16.2194	18.1098	18.1325	18.9843	21.1695	23.1155	24.5543	26.4666	28.5063	29.579	31.8923	33.8253	35.8505	36.9022	38.2962	40.6366	42.3558	44.7106	45.3759	46.4248	48.6821	50.5768	51.6253	53.7968
	9.90713	9.71868	10.3947	11.2128	10.2806	9.15162	10.2428	11.7841	11.6841	11.1073	11.1399	11.9409	12.4147	11.4724	11.9407	11.0241	11.633	11.8471	12.4042	11.2331	11.6315	11.7552	11.3319	11.4009	11.7923	12.542	15.178	15.3648	16.3047	18.0537	20.4972	22.2907	23.9719	25.7703	26.7821	30.2828	32.3639	33.9112	35.2684	37.1434	40.58	42.8745	46.5482	47.6411	49.5993	51.8457	55.5422	56.9015	59.7563
	7.66382	7.38054	7.95651	8.76387	7.81529	7.13277	7.26431	8.30445	7.80609	6.88162	6.96786	8.04016	8.22043	7.15584	7.27147	6.87122	7.52214	8.00395	8.03521	7.08928	7.09587	7.52538	6.84294	6.73412	6.94028	8.20706	9.61312	9.98237	11.0192	12.9021	14.8437	16.8278	18.6891	20.7134	22.0573	24.5638	26.8514	28.4814	29.7741	30.9737	33.3633	35.3489	37.9123	38.5991	40.324	42.534	44.7616	46.2432	48.2837
	15.3946	15.082	16.2089	17.6245	16.359	15.8737	15.898	17.181	16.666	16.1428	16.0959	17.1189	18.1521	16.834	17.8726	17.3677	17.8355	18.4104	18.3691	17.4508	18.1034	18.1534	18.0715	18.0519	18.3838	18.8089	20.6959	20.9487	22.3948	24.6929	26.6742	28.6936	30.4544	32.4945	34.2012	37.6781	39.5299	41.9274	43.5695	45.1015	48.1018	49.9441	52.9051	54.2358	55.7332	58.1852	59.987	62.3396	64.2471
	14.5095	13.9992	15.6223	15.8471	14.4038	13.9062	13.8265	14.4582	14.4599	14.1057	14.2134	15.7655	16.7289	15.3345	15.0804	15.2686	15.2999	15.7951	16.6817	14.8441	15.6503	16.1484	15.1543	14.7917	15.2527	15.7076	17.6736	17.6999	19.2315	21.3079	23.5063	25.0949	27.3154	29.2042	30.8745	33.9391	36.6779	37.7632	39.3078	40.4635	42.6908	44.0089	46.9054	48.0034	49.8966	52.0845	54.9309	56.24	58.1595
	26.1642	26.7972	28.4707	29.2645	27.3829	26.6743	26.6896	28.0101	28.0437	27.5198	27.2143	27.9295	28.8269	27.2249	27.6921	27.2392	27.7626	29.1455	28.5833	28.2291	28.6179	29.2232	27.8735	28.0042	27.8182	28.7737	30.1425	30.1971	31.9083	34.3819	37.8167	40.7174	43.2586	46.8973	50.0191	54.9561	59.2223	62.1195	65.3711	68.6806	73.5406	76.2069	82.7718	86.3445	89.2885	94.3356	98.8533	101.097	105.418
	22.7751	22.4744	23.0526	24.0712	22.8452	21.8121	21.7503	22.8581	22.9368	22.1315	21.9036	22.2587	23.2054	21.3313	21.4756	22.0957	22.0469	22.9299	23.1029	22.6266	23.121	22.1912	22.3992	21.7331	22.3553	22.1554	23.3964	22.9388	24.0308	25.7257	27.9509	30.337	32.7623	36.583	39.1171	43.4892	46.9112	50.4938	53.1019	56.548	60.0237	64.958	69.8337	71.8185	75.7764	81.8013	86.1678	88.8736	92.6451
	12.1932	11.8373	12.3757	12.4623	12.1684	11.2362	11.212	12.073	11.9339	10.9804	10.9797	11.6382	12.3058	11.336	11.9809	11.5496	11.6775	12.4595	13.3591	12.0714	12.3775	12.5429	12.2634	11.6664	11.9752	11.963	13.0209	13.3456	13.9067	16.5334	18.1768	20.5433	24.1942	27.2268	31.0532	36.6031	44.4778	54.2235	60.752	68.8569	80.6897	92.9058	101.632	110.07	118.614	122.188	127.355	133.583	139.805
	22.7602	22.1608	22.8519	23.9175	23.4958	23.0639	23.2961	24.6209	23.797	22.5951	22.7359	24.1508	24.714	22.8902	24.3804	23.9722	24.138	24.9066	24.8381	23.5999	24.0567	23.8638	23.3433	23.0859	23.4795	23.4714	24.8194	24.7403	25.7421	27.3068	28.9966	31.2371	33.7634	35.7583	36.9979	40.708	44.2431	47.137	48.8735	51.8215	55.7076	59.0585	62.6532	66.2701	71.2414	74.5797	78.5091	81.686	85.7458
	28.6534	28.3678	29.2002	29.5389	29.3789	28.2603	29.6284	29.9625	28.9268	28.6917	28.9132	30.4145	31.0406	29.1427	31.5918	30.8352	30.6011	32.8023	31.5381	31.0188	31.3117	31.514	30.1723	30.3995	31.3297	29.8998	30.3929	31.1433	33.2982	36.1261	38.2078	40.6586	42.3019	44.955	45.4508	49.2416	51.6236	53.9436	55.4266	57.4223	60.0572	62.5693	65.79	67.5952	69.4813	71.7337	74.5971	75.7722	78.1214
	29.4198	28.9966	29.5796	30.3376	30.377	29.432	30.7366	31.2439	30.312	29.9874	31.4731	33.4618	33.969	32.4148	33.963	33.3838	33.5553	35.3767	34.6699	33.9839	34.0846	34.3349	32.8846	32.9387	34.0899	32.71	34.19	34.8484	37.6401	39.616	41.6902	43.7958	46.683	48.8638	51.1815	54.6492	57.0483	59.3655	61.3237	62.862	66.267	68.465	72.2471	74.2142	76.3179	79.6627	82.1055	83.8832	86.648
	32.283	32.4056	33.6306	34.6838	34.4025	33.0916	32.9851	35.0734	35.0506	33.5247	33.6663	34.5775	35.1749	33.2881	33.7938	33.3701	33.7485	34.0656	34.5049	33.2641	33.9043	34.0391	32.8711	32.9016	32.9823	31.5054	31.3849	30.534	31.7921	33.5152	36.4007	38.9633	42.0983	45.3779	48.0944	53.4019	57.4256	62.9884	69.5404	73.6185	83.2948	88.4629	95.2369	98.9546	103.826	108.201	113.669	117.405	122.128
	16.2284	16.0863	17.3565	18.079	17.1759	16.2795	16.306	17.875	17.7681	16.8718	16.9784	17.8821	18.406	17.0127	17.7787	17.381	17.7852	18.0452	18.3735	17.5155	18.3619	18.7457	17.7791	17.8674	17.7995	18.2654	19.5937	19.0935	19.8016	21.6525	23.8946	26.3418	28.3823	30.5838	32.004	34.9606	37.3804	39.4673	41.1672	42.5542	45.193	47.1582	49.8322	51.0752	52.1733	54.5583	56.899	58.3218	60.6896
	54.4716	53.9105	51.6729	53.582	52.0491	48.9674	50.2023	52.8613	51.6618	50.8578	49.2348	50.7591	52.0666	49.0035	50.0363	48.2997	47.8135	46.4516	46.8801	45.1504	44.6284	46.2769	45.0894	45.9808	45.2458	42.9803	44.1879	44.4697	47.8042	51.8579	59.1253	67.6755	76.5626	83.1592	87.8649	97.8506	103.978	107.891	110.854	112.861	116.964	119.494	123.34	123.824	126.704	129.138	131.586	131.993	133.804
	48.6031	50.0551	48.9216	49.9259	49.0761	47.5142	47.8214	48.9321	51.6218	49.0691	47.177	47.5106	47.7926	46.0053	49.1534	48.0599	48.0604	48.0281	49.7236	47.7339	47.8052	47.9294	47.511	47.3524	47.644	46.5895	48.8189	47.3368	50.4731	57.5642	63.2409	74.8362	90.9752	113.951	128.329	148.222	159.926	169.591	178.728	190.579	201.721	210.785	220.472	224.162	231.087	235.342	241.1	243.747	247.721
	33.2249	33.0676	33.417	34.2764	33.5175	33.63	33.4875	35.1061	34.756	34.1215	34.0275	35.5037	36.8983	36.0348	35.9639	35.5737	35.1027	36.1498	36.1332	35.3308	36.5914	36.1691	36.1061	36.5615	36.5662	36.3	38.9749	40.2673	43.5493	48.8433	52.6927	56.9303	60.8395	65.059	68.0059	74.0399	78.01	81.7978	84.7747	87.3423	93.0282	96.1193	101.589	104.334	107.558	115.454	123.087	125.313	127.56
	31.7599	31.65	32.2954	33.144	31.8168	30.9464	31.3463	32.3035	32.4433	31.7153	31.4644	32.9947	33.337	31.7295	31.6665	31.2568	31.4734	32.4987	32.431	30.4504	31.4177	31.7228	31.6504	31.6586	31.9582	33.1062	36.0258	37.7261	40.2873	45.4475	49.7854	54.6172	58.4888	63.0653	66.1714	72.045	74.9693	79.7996	81.8081	84.7029	90.0303	93.1439	96.6787	97.8818	100.541	102.66	106.181	107.968	111.616
	12.7041	12.4308	13.2197	13.7115	13.5667	12.6499	12.9423	14.4928	13.8606	13.158	13.4346	14.3176	14.8255	13.4804	13.927	13.7124	14.3615	14.6036	14.9502	13.9516	14.5352	14.8123	14.0062	13.9167	14.2135	15.0587	16.8134	17.0671	18.2687	20.1922	22.1479	23.9505	25.8661	27.581	28.5115	31.6359	33.6207	35.0769	36.3996	38.4281	41.0288	42.7472	45.1062	46.5558	48.4118	50.7703	54.5153	55.9723	57.928
	11.8397	11.8617	12.6575	13.4035	13.0232	12.1691	12.6095	13.9092	13.6431	12.7881	13.4799	14.4475	14.9254	13.7439	14.2714	13.8855	14.8264	15.1851	15.0426	14.2778	14.8418	14.8092	14.3596	14.3073	14.5764	15.8033	17.1233	16.7767	17.4595	19.6488	21.1878	22.8197	24.4707	25.926	26.7422	29.2245	31.1848	32.1574	33.2876	34.3944	36.1362	37.692	39.5498	40.5425	40.7866	42.5362	44.3183	45.9069	47.2035
	17.5291	17.2191	17.8722	17.9623	18.7389	18.3362	19.6516	21.4309	21.8065	21.3719	23.1802	24.3656	24.5457	24.2774	24.1875	24.1179	24.9265	24.9262	25.9622	25.1741	24.7426	24.1433	22.872	22.6789	22.2851	20.9367	22.1815	22.8463	25.9711	31.8954	34.5042	40.225	47.2585	53.2331	57.6684	67.9785	75.2022	82.1171	88.4122	92.4451	99.8072	105.803	111.152	114.069	116.975	119.983	124.217	126.195	129.226
	33.6314	33.429	34.8907	34.7975	34.5776	33.7938	34.5113	35.909	35.1134	34.064	34.8695	35.4543	36.7908	34.7986	35.7395	34.3868	35.4305	35.813	35.7374	34.2122	35.0599	34.5212	34.0441	34.2429	34.3403	35.1671	38.005	39.0201	41.1498	46.2161	50.0254	53.5439	58.0175	61.8779	64.3545	71.5631	77.4575	81.836	85.5092	89.1387	94.7975	99.3783	106.459	108.384	112.627	116.722	122.077	125.208	130.563
	17.4248	16.8907	17.9677	18.7094	17.4724	16.6598	16.9193	18.3145	17.6954	16.8497	17.0213	17.8636	18.6449	17.4914	17.785	17.2188	17.5368	18.2132	17.6308	16.9757	18.1516	17.9585	17.2451	17.1538	17.3369	18.6595	19.4268	18.8127	19.3687	20.5591	22.0181	23.0821	23.7885	24.7688	24.8633	26.9753	28.2771	28.6137	28.848	29.5688	30.6469	31.6999	33.6871	33.2179	33.8353	35.0603	35.7265	35.9674	37.2457
	36.7557	36.164	35.4118	35.7869	37.1909	36.9848	36.9891	37.8959	38.0705	38.8704	37.1802	37.5611	37.3601	37.6024	38.8056	39.8364	39.1128	38.4767	38.1413	37.6764	38.6117	38.0787	38.7719	39.0849	39.2741	38.9609	40.9034	43.5545	43.8851	45.9537	47.5388	50.1937	53.0241	55.6337	56.7319	58.1627	60.579	63.8383	65.9353	68.5759	70.1064	73.9252	78.0407	78.6931	77.5392	80.9292	84.8249	85.9276	89.5173
	35.4288	34.1574	34.5992	35.061	36.3714	36.265	36.6261	36.9489	37.3582	38.4168	37.7693	37.694	37.7947	38.8257	37.8884	39.6983	39.8247	39.4527	39.6653	39.9184	39.9057	40.2653	41.0818	41.5153	42.5708	41.6629	43.3394	46.2422	47.5025	48.2804	49.5778	51.6809	54.1565	56.1619	56.7044	58.0084	58.932	61.4861	63.2021	65.0443	65.3156	66.4	70.0848	71.0402	70.0427	72.4721	74.0776	75.0335	78.5686
	24.0075	24.3347	23.5694	24.041	26.0782	25.1648	25.5141	25.3274	25.0154	25.329	24.7273	24.137	25.4896	25.3473	24.6253	26.2834	26.4015	26.4559	25.7089	25.6014	25.9459	25.402	26.0847	26.1917	27.233	27.619	28.7328	31.5701	33.9254	35.5316	37.8314	40.05	42.8432	44.9655	46.0506	46.9999	47.8684	50.2825	52.0463	53.8571	52.693	53.3739	56.9051	56.9437	56.1148	58.4198	59.3424	60.231	62.7971
	21.3231	20.6605	20.241	20.2959	21.5801	21.2657	21.8556	22.0528	21.9037	22.9237	22.0466	22.1314	22.2218	23.1828	22.1807	24.0102	24.2248	23.4932	23.7862	23.8213	24.1873	23.7263	24.6783	25.2446	25.7435	25.1878	26.1108	28.5443	29.1905	29.7326	30.4918	32.2993	34.7371	36.8537	37.1819	38.313	39.0008	41.2903	42.8693	44.9962	43.9874	45.2966	48.3291	48.7818	47.8508	50.5896	51.7653	52.3289	54.9373
	26.4385	25.0688	24.597	23.3652	24.5504	23.3927	22.7418	23.355	23.0462	25.6201	24.5574	24.956	24.3163	24.9568	24.1246	25.618	24.455	24.4222	24.2035	22.8531	23.0196	23.7986	23.7755	24.1898	24.1446	25.2952	26.4331	29.5849	35.2931	36.5835	40.5863	45.2783	51.3688	57.5606	61.791	64.448	67.7833	71.6747	74.8119	78.8297	79.836	80.8662	83.6412	85.4938	84.9762	87.9626	89.1618	90.0974	93.9898
	17.2697	16.742	16.4987	16.6334	17.8094	17.5065	17.7204	18.2519	18.1948	19.0741	18.2791	18.0101	18.3027	19.1487	18.4577	20.2087	20.2395	19.6312	19.8874	19.4916	20.156	20.0953	20.6418	21.044	21.5662	20.563	21.9147	23.9311	24.5164	25.5148	26.3562	28.9573	31.3655	33.688	34.4467	35.4501	36.7015	39.17	41.0525	43.5951	43.6097	45.0967	48.281	49.3806	48.8653	51.6949	53.065	54.0473	57.1225
	41.1813	41.9835	40.3771	39.0823	41.148	40.7596	40.7921	41.0379	40.1192	40.1071	39.3842	39.0828	38.2774	39.5317	39.7615	40.5474	39.682	39.8591	39.762	39.7777	39.6691	39.4707	40.2623	40.1729	40.2503	39.7592	42.377	46.1909	49.6965	52.872	55.833	60.23	64.306	69.2747	71.3963	73.7395	76.5496	80.1696	83.1443	86.9609	88.098	91.1345	96.6205	97.0305	96.5481	99.0644	101.976	101.741	105.131
	34.6805	33.6414	33.237	32.4527	35.1584	34.0344	33.7901	35.239	34.2185	33.9101	32.3616	31.2247	30.6933	31.3279	31.0997	32.2748	32.4118	31.9259	31.4961	29.8864	30.3393	29.1343	29.95	29.9007	30.0566	29.5669	30.6093	34.1394	35.8763	38.9317	41.8252	48.0692	51.5589	55.2431	59.1408	62.5397	65.1305	69.6917	74.6291	79.4577	80.9933	83.9306	88.8802	89.8211	89.4779	93.7327	96.0687	97.4641	101.434
	10.103	9.98401	9.79934	9.77942	10.8165	10.9963	11.2525	11.6675	11.4299	12.1499	12.1059	11.4735	11.5909	12.2344	11.6192	12.8862	13.0659	12.7427	12.6998	12.4509	12.7622	12.5496	13.3798	14.0565	14.7378	14.1871	14.9261	17.1488	18.2359	18.8365	19.7811	21.8591	24.1099	25.8848	26.1205	27.1184	28.0929	30.0439	32.1712	33.7701	33.8259	34.7158	38.006	38.8666	38.6623	41.1084	42.6112	43.8235	46.5673
	21.1149	20.4568	20.2908	20.4711	21.5777	21.3797	20.8199	21.314	20.8861	21.3571	21.1504	21.1038	21.2869	21.5087	20.6957	22.0811	22.2383	21.7544	21.7671	21.3514	21.6199	21.2056	21.7395	22.4594	23.0772	21.5586	23.3162	26.7475	27.7009	30.1607	33.1747	36.863	40.9502	44.374	46.7276	49.63	51.9273	54.7294	58.726	62.2605	62.9627	64.7649	69.3737	70.5104	71.3839	74.864	77.7391	78.724	81.9639
	65.4115	65.1185	64.5957	59.9082	60.0614	60.6901	60.4268	58.4001	59.243	59.1028	60.3042	58.058	57.5977	58.6706	55.5012	60.4488	56.9823	58.1287	55.6821	61.769	61.6065	58.8809	63.6224	59.2527	60.2726	64.1497	69.516	71.3064	77.7756	83.065	88.4684	95.0689	103.527	107.295	111.028	115.751	119.896	124.923	129.231	134.427	132.127	133.02	135.743	136.462	134.401	139.327	139.413	139.225	142.714
	42.4254	41.2978	38.7417	37.7286	39.3271	40.2356	39.8173	39.1268	37.1479	37.7634	35.923	34.587	34.1935	35.7576	34.172	35.2861	39.0057	37.5565	36.5517	39.8777	39.1804	37.9881	37.4106	40.1737	38.4737	39.2036	38.4691	41.6549	42.0566	50.9101	54.8436	59.3622	64.0567	68.631	70.1236	72.6616	75.279	81.8403	87.25	92.5603	90.9936	91.7097	94.41	93.8945	91.0247	92.9339	93.9528	93.4442	95.4067
	25.8368	25.1858	24.9062	24.8212	26.2141	25.7144	25.8575	26.7867	27.1199	28.105	26.7111	26.3677	27.1357	28.1827	27.5163	29.0066	28.4802	27.7118	28.4454	27.7798	28.1221	27.9277	28.9411	29.2904	29.2972	28.6099	29.544	32.3163	33.5418	35.0847	36.2594	39.4398	42.2536	45.1828	46.9832	48.4313	51.7675	55.5897	59.3949	62.6117	62.0156	63.9706	68.6346	69.743	70.1307	72.9412	75.1763	75.392	79.9584
	10.3267	9.50478	9.24258	9.25175	10.5906	10.3025	10.3056	10.6817	10.3872	11.3676	10.7012	10.1417	10.1324	10.7675	10.1387	11.3622	11.5	10.7676	11.0604	10.7394	11.1117	11.0615	11.5166	12.1213	12.4514	12.3037	13.1709	15.2421	15.2054	15.701	15.9653	17.504	19.4587	20.6636	21.0227	21.9778	22.4632	24.4965	25.4581	27.0647	26.4809	27.5871	29.3596	30.1886	29.6084	31.9073	32.9591	32.991	36.0471
	40.0737	39.1499	39.2581	39.7347	41.1555	41.4482	41.6058	42.0463	41.6228	43.6179	42.2798	41.7921	41.7894	43.1754	42.5866	44.176	44.0251	43.5978	43.7565	43.0267	43.7099	43.4295	44.2246	44.482	45.1508	45.4133	46.3863	49.8099	50.3148	50.8599	51.6348	53.6013	55.7545	57.5414	58.0829	58.4653	59.1747	61.0773	62.4081	64.5443	63.4569	64.3849	67.19	67.9683	67.1308	69.3716	71.0741	71.0129	73.9882
	36.1308	35.6862	35.3196	35.8776	36.9736	37.6254	37.0941	37.374	37.3397	38.0115	37.633	36.9506	36.7679	36.7941	36.0004	37.2238	37.106	36.7357	36.4943	35.9757	36.7352	35.8341	36.8811	37.2591	37.6318	38.1763	39.3761	42.4564	42.5117	44.0228	45.6015	47.994	51.1852	53.2656	54.7622	56.658	58.2414	61.2197	63.6145	66.8988	67.5277	69.2875	73.3221	74.9554	74.0691	77.4442	78.914	79.8818	83.2088
	14.3393	13.5937	12.8708	12.7509	13.8154	13.4405	13.5116	13.3622	13.1216	14.0107	12.6376	12.9425	13.1058	13.4656	12.9138	14.4437	14.1406	13.3015	13.6756	13.4444	13.5267	13.3352	13.9967	14.6626	14.9602	14.6258	16.0227	18.6387	20.0742	21.5538	22.375	24.7299	27.56	29.4089	29.8497	31.0009	32.0915	34.7954	36.4751	38.8269	38.0466	39.9868	42.7187	43.4578	43.3371	45.6765	47.5032	49.0843	52.1436
	37.177	36.5464	36.0498	35.9664	36.5902	36.7268	36.278	36.6883	36.8036	37.4192	37.7572	37.4594	37.9631	37.8742	36.8333	38.4948	38.6273	37.5687	38.0089	37.8295	37.8528	37.3782	38.1785	38.102	39.1032	38.6337	41.7757	44.9128	46.4339	50.0383	52.4066	55.1479	60.001	63.4548	65.8424	68.3487	71.106	75.4439	77.996	82.033	81.864	84.4671	89.4827	90.6545	90.7515	93.3377	96.1724	98.3732	102.098
	9.13148	8.33342	8.06338	7.94905	8.73176	9.13207	9.3889	9.56537	9.14022	9.96361	9.48631	9.54052	9.42483	10.1303	9.39974	11.4426	11.3087	10.742	10.7837	10.6781	11.3299	10.5601	11.7159	12.2449	12.586	12.1654	13.0589	15.2814	16.3709	17.2607	18.3478	20.2345	22.7984	24.4688	24.9172	26.045	26.833	29.4538	30.803	32.6184	32.2656	33.6442	36.8061	37.4203	37.2363	40.1681	41.8154	42.1831	44.9679
	37.4094	36.8513	36.5071	37.5777	38.3688	38.4693	38.3915	40.5171	39.9283	41.4305	40.3103	40.6161	41.4323	42.0387	40.8649	43.6017	43.1745	40.5479	38.8496	37.2639	37.4133	36.8353	37.0802	36.6272	37.4079	34.9244	35.938	38.0304	40.6382	44.4018	46.3506	49.571	53.3423	56.7689	58.5039	61.7562	63.5236	67.0873	69.2668	72.523	71.8606	73.2115	76.6373	76.978	75.9334	78.351	79.5182	79.5026	81.6162
	18.3864	17.5095	17.2969	17.4191	18.6233	18.7807	18.8119	19.2378	18.9352	19.904	19.4931	18.7728	18.8702	19.5726	19.1008	20.6707	20.5745	20.1241	19.6611	19.4738	19.7817	19.9323	20.2569	20.4408	21.0543	20.3224	21.3197	24.4521	24.9523	25.7883	27.001	29.1059	31.4398	33.5761	33.9928	35.0859	35.9943	38.4738	39.6868	41.5186	41.4024	42.4853	45.6858	46.0727	45.3222	48.0477	49.3074	50.386	53.6814
	18.1727	17.6027	17.4754	17.5003	18.8903	18.6168	18.8327	19.1588	19.0279	19.9635	19.3574	18.8579	19.0979	19.8208	18.9907	21.1606	20.7848	20.4251	20.1019	20.1774	20.3842	20.161	20.8614	21.1807	21.9133	21.3268	22.6323	24.9985	25.6987	26.4857	27.8739	29.6989	32.134	33.9518	34.5834	35.9135	37.0001	38.9681	40.9238	43.1265	42.7824	44.0816	47.1688	47.9431	47.7553	50.297	52.1475	52.9642	56.0157
	19.7516	19.238	18.9841	19.0202	20.5786	20.5351	20.9764	21.5338	21.7772	22.8325	21.5951	21.1668	21.9894	22.9705	21.921	23.6799	23.7739	22.892	22.792	22.282	22.7526	22.521	22.8151	23.5772	23.982	23.1981	24.8837	26.9501	27.8583	28.8366	29.8456	32.4029	34.8534	37.3843	38.7356	40.3512	41.4428	44.8203	47.3335	49.4999	49.3603	50.9253	54.6964	55.5941	55.0775	57.9043	59.4928	60.2096	63.0526
	19.5823	18.9923	19.0423	19.5057	20.4613	20.5414	20.2766	20.6904	20.3759	21.3641	20.6241	20.7707	21.007	20.9186	20.0168	21.0209	20.1096	20.0388	19.5953	18.9259	19.1387	18.5873	19.8778	20.0271	20.3048	18.9736	20.7006	23.9491	26.3707	28.49	31.8254	35.5821	39.7403	43.5772	46.883	51.3762	54.5724	58.6022	63.7235	70.1767	73.0691	76.5383	81.4478	83.4833	85.1369	89.9039	96.1797	97.601	102.283
	17.7551	16.772	15.8004	15.3552	17.6475	17.2335	17.3129	18.0902	17.0839	17.5922	16.9015	16.873	17.7702	18.3635	17.6553	18.1515	19.6224	18.5138	18.5938	18.7967	19.4364	19.2835	19.3894	19.4883	19.9697	18.7588	20.2918	24.3004	26.455	29.5902	33.2883	41.0258	48.5219	56.9252	60.9325	64.852	71.6287	81.5698	86.7548	91.679	94.5299	99.0006	105.963	108.208	107.674	112.619	115.461	118.628	123.029
	7.5948	7.34523	7.00938	7.622	8.26301	8.23437	8.32953	8.63188	8.13379	9.56113	8.73162	8.54591	9.28627	9.63938	8.33943	9.63018	9.7443	9.30629	9.4562	9.44258	9.33254	9.23712	10.2064	10.4926	10.5061	9.61288	10.7332	13.0031	13.8886	15.3109	16.5308	19.2436	23.2749	25.6379	27.563	29.9949	32.2444	36.1874	38.2249	41.1885	42.424	44.6168	48.9677	50.8385	51.5091	54.8516	58.2081	59.4544	63.5444
	44.8067	43.9947	44.7837	44.2912	45.3663	46.2557	45.8555	46.0267	45.8542	47.7244	46.8951	45.5636	46.2842	47.0668	47.0042	47.3109	48.8604	48.3405	48.8241	47.6699	49.1038	49.0298	48.3784	49.2195	49.5878	49.2192	51.123	55.7673	56.2231	58.7087	61.4208	64.4571	68.559	71.9822	74.8346	77.2079	78.517	83.1022	86.575	90.6199	92.0078	94.1353	99.3677	101.222	100.734	105.205	107.222	107.886	111.015
	27.7674	26.9577	27.0595	27.0854	28.304	28.3989	28.7716	28.6282	28.652	30.1702	29.1907	28.8055	29.0279	29.3612	28.8868	30.4646	30.6971	30.413	30.305	29.628	30.0961	30.2413	31.033	31.044	31.7757	31.0951	32.421	35.1803	35.53	36.6893	38.4252	40.9132	44.1419	46.8549	48.1627	49.7263	51.3429	55.2135	57.0976	60.2362	60.32	62.0562	65.4834	67.0116	66.3021	69.9725	71.876	72.0582	76.3579
	25.2772	24.6551	24.5802	24.1297	26.3735	25.7367	25.5521	25.6851	25.5475	25.8432	25.9527	25.1868	25.4971	25.7313	24.6218	26.41	25.866	25.7124	25.4172	25.7024	25.326	25.9616	26.571	26.9698	27.7017	25.2833	27.2366	29.5527	30.0251	31.989	33.0999	35.0668	38.6081	40.1351	40.4828	42.6103	43.4852	46.085	48.9886	51.43	51.314	53.5828	56.9793	57.8145	57.9102	60.7399	62.7044	62.8657	66.6491
	24.1387	23.8438	23.8277	23.887	24.2645	24.6315	24.1757	24.4602	23.8817	24.2715	24.0028	23.882	24.1404	24.1123	22.8196	24.483	24.4931	23.7477	24.1442	23.4494	24.5143	24.5108	26.0668	26.6397	26.2529	25.3639	27.2098	30.959	32.1875	34.8806	36.509	40.7165	45.491	48.6269	51.3384	55.1809	58.9323	63.2404	66.6413	70.1863	70.3226	74.3663	79.367	80.5813	80.963	84.9674	87.8921	89.2086	92.9712
IKO 1	24.2812	23.8985	24.0763	25.4275	25.1926	25.1026	24.5439	24.8583	25.6102	25.7197	24.5081	25.1699	25.1283	26.206	25.4544	24.955	26.3633	26.4215	25.7363	25.3528	25.7607	25.7862	27.1195	27.2546	26.9438	27.2748	28.8317	30.216	31.2735	33.6653	35.8603	36.8044	37.531	41.1337	43.1822	43.3974	46.0631	46.9755	48.3364	50.145	52.1073	55.0856	55.3065	56.8952	59.0049	59.6562	62.1159	64.2893	63.9422
	29.9533	29.7648	30.0069	31.6335	31.64	31.2956	30.814	31.1926	32.7514	32.2134	31.2226	31.7444	31.5423	32.6141	31.524	31.1933	32.5721	32.6614	31.9485	31.6636	32.2244	31.9756	33.3864	32.9088	33.3429	33.0193	34.654	35.5519	35.7258	37.697	38.5256	39.172	39.6492	42.8047	44.3011	44.6224	47.0276	47.302	49.2527	51.0311	52.9897	55.62	56.156	58.0673	59.8465	60.6606	63.728	66.7538	66.1458
	38.2593	37.8416	38.1958	40.052	39.2435	39.3987	38.8033	39.3335	40.2339	40.0759	38.6137	39.831	38.8357	40.2682	39.8455	39.4742	39.8689	39.8423	39.5422	39.4899	39.9018	40.0132	41.7222	41.1696	40.701	43.4919	44.5199	45.2805	45.6279	47.35	49.0087	49.6901	50.0288	53.6022	54.6222	54.8251	57.3446	57.669	59.8808	61.6905	63.3898	66.367	66.2499	67.8904	69.7355	70.5026	73.1434	74.922	74.8821
	28.7448	26.9651	29.3897	30.8679	28.9955	29.4804	29.3764	30.1539	30.6132	30.2076	27.9002	28.9486	28.6657	30.2514	29.9753	29.3059	30.129	29.717	29.3508	28.424	30.0503	29.5343	31.6763	31.6045	31.1444	31.5577	32.6737	32.9935	33.3575	35.1001	35.9858	35.9541	36.3256	39.5851	41.025	41.2652	43.952	44.5586	46.3988	48.4837	50.6043	53.3123	54.0568	56.293	58.8487	59.4809	62.7725	65.6969	65.8006
	20.0219	23.6156	21.6897	28.9965	29.1809	24.7208	28.5475	34.6077	24.501	34.56	27.865	24.4931	26.9516	24.9097	23.041	25.4283	26.3852	22.5273	24.0053	26.545	24.8779	25.7866	35.5182	30.6623	36.2956	35.0497	36.4108	36.4912	37.7657	30.3235	32.5027	33.5458	34.2253	36.4031	37.9053	37.918	40.2114	40.7987	42.7839	44.2736	46.1827	48.4614	48.6263	49.9407	51.7125	52.8694	54.003	57.0514	56.5445
	24.1565	25.5715	25.5175	26.9728	27.3644	26.9388	26.2801	27.0279	27.6601	27.803	26.4656	26.8889	26.7372	27.4758	27.1268	26.7141	28.599	27.9805	27.6087	28.0147	28.5708	28.8247	30.3333	29.7133	29.7139	29.9497	31.6172	32.6685	33.2931	35.8325	37.7706	39.4244	40.209	43.9946	45.5404	46.832	50.4092	51.7105	53.3213	55.9044	58.117	60.9762	62.0736	64.2745	66.6911	67.7635	70.8758	74.5487	73.0978
	24.3154	24.1382	23.9571	25.7872	25.393	25.4356	24.3918	24.7423	26.3442	26.0462	24.7328	25.4445	24.8417	26.0155	25.194	24.7965	25.4654	25.7557	25.1108	24.3555	24.9579	24.7981	26.2271	26.1517	25.8689	25.5155	26.4703	27.3741	27.9496	29.4888	30.6163	31.4727	31.5961	34.555	35.6611	35.8	37.8885	38.7326	39.8546	41.5569	43.9349	46.8005	46.4973	48.3287	50.1299	51.6104	54.577	57.4664	57.572
	32.8194	32.8149	32.3781	34.2866	34.1311	33.7055	33.1299	33.313	34.0948	34.0256	32.4386	32.975	32.5204	33.7749	32.4365	32.7293	33.5086	33.2397	32.4615	32.3279	32.807	32.8381	34.0739	33.7177	33.3476	32.7579	33.3686	33.7626	34.0713	35.5283	36.2493	36.1885	35.7497	37.4492	38.1613	36.7926	38.2234	37.6531	38.2605	39.0206	40.1726	41.6697	40.6481	41.5875	42.7082	42.3118	43.5723	45.5323	43.8566
	37.6489	37.069	38.0502	39.9606	39.3272	38.8506	38.2632	38.6465	39.5697	39.3385	37.9891	38.73	38.648	39.2811	38.9265	38.5015	40.1636	40.0016	38.9123	38.4765	38.6261	38.9823	40.331	41.0726	40.3181	39.1017	40.9551	41.5036	41.7779	43.6274	45.1175	45.3344	45.5282	48.1219	48.8313	48.614	51.4134	51.1087	53.2111	54.9616	56.5702	58.4201	58.1781	60.9833	62.1785	63.443	65.3206	67.8721	68.7397
	30.145	29.9284	30.4859	32.4654	31.5054	31.5131	31.2552	31.495	32.753	32.074	30.5979	31.546	31.267	32.44	31.5336	30.9867	32.0239	32.2891	31.446	31.0141	31.4735	31.3555	33.3618	33.1127	32.626	31.9876	32.6648	33.782	33.7978	35.4377	36.1184	35.9509	36.1366	38.7653	39.5034	38.8882	41.3913	40.8288	42.453	43.5155	44.4727	46.5018	46.2809	47.7334	49.3108	49.5896	51.8072	54.0989	52.9823
	31.4918	31.5926	31.4624	32.9565	32.9979	32.9878	32.2712	32.6091	33.2994	33.3924	32.1557	32.2942	32.4076	33.2587	32.6199	31.7491	33.342	33.3698	32.3351	32.3316	32.6743	32.3542	33.6807	33.1497	32.8075	33.1509	33.9136	34.7138	35.3885	36.9656	38.2132	38.0077	38.1748	40.997	41.805	41.8451	43.5041	43.1564	45.0669	46.755	47.6905	49.9138	49.696	51.4163	52.9963	53.5425	55.4541	58.3889	58.3666
	31.4758	31.7513	31.5966	33.599	33.0458	32.5815	32.3811	33.0116	33.9635	33.6233	32.8586	33.3338	32.3143	33.547	32.7807	32.8646	33.3083	33.4356	32.3568	32.3762	33.1495	33.1143	34.7261	34.1217	33.9828	33.2475	34.1298	35.2691	35.3559	36.5769	37.2177	37.9679	38.0798	40.18	41.3568	41.1889	43.288	42.8548	44.078	45.1532	46.82	48.8665	48.0461	49.6638	50.4961	50.5716	53.3038	55.4097	54.7527
	35.8996	36.2178	36.3223	37.9898	37.8475	38.1521	37.4824	37.504	38.53	38.7109	37.5837	38.6443	37.5114	38.7531	38.163	37.9038	39.1867	39.1599	38.0333	37.5954	37.8244	37.7627	39.0817	39.0051	38.3341	37.7451	38.7019	39.3549	39.4219	40.9739	41.5535	41.2862	41.0523	43.2573	43.7976	43.1384	44.8129	44.019	44.428	45.6932	47.2689	48.2012	47.3747	49.0711	49.7222	49.6365	51.4762	53.0826	52.1444
	21.8135	21.9105	21.9163	23.5937	23.5091	23.0689	22.7725	22.836	23.6229	23.611	22.4991	23.1554	22.9272	23.6493	22.959	23.2909	23.5689	23.8447	23.0205	23.0709	23.4574	23.4128	24.8604	24.6471	23.7597	24.052	24.5486	25.4751	25.2435	26.3663	26.7712	26.9144	26.2693	28.4863	29.3986	28.9555	31.0362	30.581	31.5197	33.3758	34.4966	36.0075	36.1642	37.8396	39.0838	39.7594	41.6531	44.2618	43.8312
	24.2589	24.2813	24.524	26.1166	25.2595	25.4497	24.6794	25.5914	25.8607	25.9694	24.7471	25.2075	25.0644	25.593	24.8746	24.8176	25.8334	26.5649	25.6057	25.1772	25.6465	25.4561	26.8708	26.5952	26.5903	25.9222	27.0066	28.0163	28.4704	30.6348	32.1151	32.7878	33.6884	37.1714	38.5942	39.4644	42.4126	43.1641	45.8777	48.0863	50.5816	53.8017	54.8295	57.2954	59.1702	60.8304	63.5476	66.4215	66.7507
	39.1345	39.403	39.7276	41.3759	40.7993	40.6628	40.043	40.4934	42.1001	41.481	40.0378	41.074	40.5099	41.8728	41.1901	40.4341	41.8792	42.3295	41.821	41.0311	41.3786	41.6859	42.3312	42.2794	42.2533	42.276	43.6107	44.7332	45.9955	48.4818	49.6792	50.877	52.1324	55.9196	58.0938	58.5158	62.251	63.972	65.9013	67.6659	71.6879	75.5145	76.7769	79.2495	82.5096	83.1737	86.3324	91.157	90.8436
	26.9804	27.1147	26.764	28.5623	28.667	28.2324	27.7044	28.0304	28.7824	28.8513	28.1115	28.6295	28.0664	29.6384	28.9784	28.4336	29.4135	30.0515	29.1846	28.2987	28.8786	28.6234	30.5345	30.0328	29.6719	29.8904	31.0393	32.1219	32.8773	35.3482	36.5228	37.8657	38.5688	41.605	43.8157	44.2851	46.9305	47.9317	50.0024	52.0154	54.0442	57.0751	57.5614	59.4764	61.4758	62.3541	65.5441	68.7779	69.6671
	18.0785	17.9747	18.1761	19.1987	19.3693	19.454	19.0497	19.4066	20.1594	20.1929	18.9044	19.8317	19.6252	20.2586	19.6778	19.4537	20.685	20.7058	19.871	19.7776	20.3508	20.131	21.4529	21.5096	21.0632	20.9727	21.883	22.4798	22.6912	24.2284	24.8823	24.9477	25.588	27.744	29.2138	29.4041	32.2415	32.2164	33.7514	35.764	38.055	40.1997	40.8933	42.955	44.4688	45.8585	48.3575	51.2277	51.2007
	28.3399	23.8343	24.8544	26.2388	25.3278	26.8279	26.2345	25.4002	26.7917	26.5991	25.4228	25.5737	25.9927	25.6241	25.4895	24.2695	25.2919	25.891	25.0628	24.4324	25.0179	24.3753	26.1566	26.7089	26.1036	27.2757	28.8828	30.0264	31.571	33.9351	35.9012	36.8258	38.329	41.4506	43.4923	43.197	47.1547	47.7512	49.5726	51.3586	53.0834	56.2592	56.2766	58.1621	60.1367	61.2345	64.2293	67.0002	67.2373
	26.393	26.1814	26.106	27.8999	28.1526	27.0625	26.8027	27.3968	28.7165	28.5197	27.1571	27.8268	27.56	28.6578	28.1542	27.7676	28.2141	28.7602	27.9401	27.7989	28.2722	28.3595	29.2268	29.0117	28.7867	29.0627	30.4764	31.4978	31.6685	33.4334	34.4335	35.2819	35.5505	38.3597	39.5201	39.7964	42.3603	42.7499	44.2272	46.0053	47.792	50.2521	50.8172	52.4241	54.1875	55.6752	58.6495	61.6796	61.8906
	24.2251	24.3667	24.5059	25.8731	26.0759	25.3286	25.3996	25.3065	26.469	25.8425	25.0917	25.5837	25.4161	25.9022	25.5959	24.9026	25.8603	25.7327	25.5813	25.3444	25.4003	25.2045	26.6171	26.5443	26.1599	25.9496	26.4591	27.254	27.4762	28.3319	29.3114	29.2733	28.9333	31.1036	32.1641	31.3789	33.2704	33.1056	34.1289	35.1292	36.6843	38.4848	38.1825	39.7331	40.5864	40.8186	42.6683	44.243	43.5763
	34.7773	34.4863	34.9334	36.1155	36.2112	35.5036	35.1869	35.4735	35.9217	36.3973	34.7794	35.438	34.9272	36.4673	35.8438	34.9855	35.9545	36.1359	35.1393	35.0115	35.7785	35.3965	36.4811	36.7661	36.1522	36.3206	37.157	37.892	37.9053	39.6721	40.3712	40.0434	40.4949	42.689	43.0229	42.9986	44.8003	44.6963	46.0177	46.5458	48.0442	49.9207	50.228	51.3026	52.5808	52.4713	55.1853	56.9655	56.0447
	28.7664	28.2929	28.0892	29.8595	29.4969	28.2703	28.2962	28.4587	29.7907	29.432	27.6766	28.6521	28.1802	29.3466	28.5274	28.3188	29.4301	29.3763	28.2839	28.2907	28.7127	29.0053	30.1704	30.0653	29.5051	30.4427	30.8293	31.1136	31.8761	32.7749	34.0825	33.7429	32.9666	34.6373	35.1146	34.5804	36.6579	35.4402	35.8972	37.0579	38.4608	39.4895	39.9075	40.7651	41.9098	42.2477	43.2892	45.4358	45.0417
	23.6381	23.3949	23.5471	24.5916	24.2733	24.687	23.4757	24.534	25.478	25.2016	23.6161	24.2841	24.1807	24.8002	24.5269	23.0505	24.4754	24.7786	24.1703	23.4925	23.7882	23.654	24.9098	25.3247	24.4832	24.3402	25.1439	25.7491	25.3692	26.9813	27.4263	26.8908	26.8276	28.6981	29.1289	28.5509	30.1357	30.0252	29.986	31.2478	32.1631	33.8626	33.3386	35.0854	35.6962	36.0122	37.4138	39.3783	38.9245
	29.9268	30.4355	30.4001	32.2398	31.9273	31.0988	30.7715	31.4123	32.1976	31.7051	30.8122	31.182	30.819	31.9909	31.0034	30.2743	32.2638	31.9065	31.4793	31.4937	31.2271	31.1149	32.7473	32.6737	31.6831	32.1502	33.2409	33.5745	34.2047	35.3176	36.22	36.593	36.8857	39.4824	40.4127	40.4952	42.2215	42.8373	43.9545	45.6299	47.8045	50.2113	49.9355	52.0983	53.6577	54.7842	56.9581	59.6729	59.5235
INO 2	24.0037	23.732	25.1528	25.0411	24.8447	25.7836	26.2616	26.6447	25.9845	27.6144	26.8595	28.6236	30.4461	30.0485	29.8853	29.6662	31.8544	31.09	29.8776	29.1981	30.5359	32.0758	30.6067	29.7413	30.3187	36.4192	38.4151	43.2201	46.9308	51.0037	56.8888	61.7363	70.3558	78.6853	82.8886	85.6575	93.2523	97.9468	100.067	106.825	110.31	113.248	115.415	117.241	121.191	124.402	127.448	128.308	129.79
	29.8456	30.4381	31.6436	31.2763	31.0102	31.9949	32.0274	32.3361	31.3466	33.3625	31.6206	31.6787	32.8679	32.9992	32.2081	31.6215	34.0415	33.6328	32.4364	32.3657	33.6323	34.9141	33.3227	33.6025	33.8417	37.6757	38.4144	41.5635	46.6173	49.214	54.756	58.8003	63.6316	67.319	69.239	73.9385	78.5488	80.5368	82.4384	86.7018	89.6137	90.9924	92.0071	92.8874	95.7839	97.4605	100.231	100.816	102.264
	38.3261	38.5077	39.2324	39.3985	38.7774	39.025	39.8761	39.6797	38.5225	41.0665	39.6038	40.7703	40.9089	40.8089	39.2553	39.6372	41.8497	42.0219	39.9276	39.6366	40.7909	42.1649	39.8577	38.9219	38.9985	41.6194	42.5497	43.9004	46.1133	48.978	54.7342	56.4743	60.2061	64.0542	64.9257	68.1588	72.6344	75.332	76.9795	80.6812	84.5395	85.6956	87.4765	89.1684	92.3613	96.1425	98.9117	100.053	101.408
	27.7935	28.356	29.5537	29.3639	29.4526	30.4172	31.3673	31.465	31.2174	33.3807	32.3773	32.882	34.6002	34.9498	34.1172	35.437	37.7685	37.2098	35.6158	36.0505	37.0129	38.3392	37.105	36.2834	36.4015	40.0918	40.751	42.9387	46.1965	49.3967	54.5405	58.1509	62.0432	67.7465	70.888	76.4695	80.8556	84.4849	87.7463	93.3668	96.7432	99.2908	101.476	104.246	108.557	113.91	117.261	119.466	122.611
	26.2684	26.7822	27.795	27.8982	27.7046	28.7891	29.1802	29.2921	29.3176	31.4122	30.3671	30.1297	32.7613	33.1163	31.7606	32.9913	36.0171	34.6994	33.3814	33.3874	34.7193	35.6416	34.6797	34.0496	34.0559	37.7162	37.8971	40.1348	43.2263	45.4643	49.8092	53.4225	57.0923	61.5387	64.0428	68.131	71.673	75.3484	77.7639	82.3724	85.9854	87.1299	89.6337	90.8187	95.2275	98.7475	102.058	103.994	107.082
	27.1897	27.678	28.8782	28.5035	28.2121	29.0137	29.362	29.4752	28.5619	30.2045	28.5605	28.6503	30.6083	30.5473	30.0691	29.4483	31.3634	31.1885	29.9279	30.0172	30.9034	32.6936	31.0911	31.1532	31.8837	34.7677	34.3968	36.2296	38.0753	40.3509	43.1264	45.3417	47.9837	50.2546	51.8299	54.273	57.9556	60.1109	61.2231	65.0129	68.1436	68.5279	70.3398	71.2553	74.415	76.7197	78.7186	80.3109	81.6346
	33.4866	33.8659	35.2377	34.7196	34.2326	35.2128	35.2976	35.2783	34.7043	36.3727	34.7482	34.4619	35.8163	36.4553	35.8127	35.0454	37.0976	36.7843	35.5684	35.3706	36.6524	37.7774	36.2919	36.0285	36.5087	39.0865	38.8695	40.0058	41.4545	43.0797	45.2307	46.7361	49.0748	50.9307	51.482	53.0556	56.3845	58.0275	59.2066	62.9292	65.1719	66.7449	68.2773	69.7848	73.0998	75.5938	78.6245	80.0644	81.9195
	27.0489	27.238	28.7566	28.1768	27.4654	28.9561	29.0276	29.0162	28.3144	30.1569	28.4993	28.4464	30.352	30.3274	29.5705	29.3648	30.5679	30.4426	29.6333	29.6809	30.7655	31.7601	30.736	30.4526	30.7126	33.8342	33.338	34.1404	35.1017	36.1498	38.1261	38.8412	41.1766	42.6001	43.143	44.4359	47.1999	48.3977	49.6526	51.9315	53.9592	54.9026	55.8917	56.7806	59.589	61.8125	64.2431	65.3703	67.2053
	32.1239	32.7417	34.1525	33.497	32.7274	33.9129	34.014	33.8899	33.3323	35.4163	33.5364	33.2737	35.0796	35.4478	34.4861	34.4532	35.8985	35.549	34.5991	34.494	35.3509	37.0885	35.7758	35.8903	36.4468	39.572	39.1698	40.2315	41.9312	43.7333	46.2696	47.87	50.2372	52.3606	53.4479	54.9807	58.423	60.3774	61.4535	64.9864	67.9069	68.8805	70.6134	71.8037	74.6564	77.8331	80.9363	82.7761	84.6908
	35.5858	36.655	37.6493	36.8906	36.3912	37.9116	37.7613	37.7322	37.3046	39.1236	37.1953	37.0738	38.8641	39.1805	38.1782	38.3965	39.9905	39.1268	38.194	38.4901	39.4406	40.5982	38.7112	38.9144	39.5115	42.5046	42.6447	43.8759	46.0651	49.0265	52.1095	54.2284	57.535	60.2154	62.0386	64.65	69.3905	72.251	74.276	78.6889	82.243	83.5928	86.4012	87.9207	91.1427	94.82	97.6643	99.7092	102.489
	31.8056	32.6204	33.3392	33.4371	32.4129	33.9736	34.6448	34.3781	33.8973	35.5884	33.9008	33.9013	35.6632	35.4016	34.5905	34.4623	36.2339	35.6976	34.57	34.7923	35.9629	37.0496	35.6554	35.6899	35.8215	38.8703	38.4205	39.4584	40.5227	42.8288	45.5843	46.8789	49.226	50.616	51.2027	53.2229	56.1332	57.4603	58.0908	61.4262	63.3988	63.9331	65.0978	66.0314	68.4872	70.6934	72.6502	73.2826	74.4405
	32.0151	32.4082	34.0929	33.5307	33.0835	34.4335	34.657	34.3426	34.0368	35.7464	34.3842	34.3636	35.9051	36.1193	35.411	35.37	36.8933	36.6213	35.302	35.6781	36.8671	37.9154	36.8979	36.3519	37.2797	39.5587	39.8992	41.0125	42.8347	45.0876	48.1761	50.2045	53.0593	55.8445	57.2625	59.1941	62.4795	64.5701	65.996	69.768	72.1655	73.9875	75.3799	76.7331	79.9183	82.1588	84.6423	86.0924	87.6259
	34.2336	34.8731	35.8747	35.9801	35.0775	36.0121	36.5123	36.5337	35.8258	37.5118	35.4351	35.8823	37.4006	38.1095	36.989	36.5296	38.3553	38.2265	36.5848	36.0814	37.6659	38.5735	36.9344	37.0262	37.2213	39.4704	39.4603	40.8975	42.7615	45.0802	48.4121	50.7834	53.851	56.507	58.0431	59.9363	63.9267	65.7632	66.801	71.1355	74.0819	75.8205	77.4254	78.5495	81.1006	83.7076	85.9075	87.6506	88.9887
	25.7639	26.2784	27.2691	27.3766	26.7601	27.5248	28.1085	27.7926	26.9557	28.9206	26.8431	27.6744	28.789	29.1327	28.4035	27.9736	30.1338	29.3004	27.9431	28.1519	29.0904	30.4497	29.1102	28.976	28.9716	31.4273	31.834	33.0106	34.6856	37.1595	40.4818	42.2578	45.6152	48.7519	49.6897	51.9528	55.875	58.2657	59.4192	63.261	66.1739	67.1227	68.7374	69.978	72.5076	75.0101	76.9117	78.6195	79.8357
	48.155	47.3243	49.0108	50.2502	49.3801	50.8959	52.2952	52.1565	50.4256	52.5961	50.1601	52.6841	51.9112	52.133	49.8968	51.5222	54.5701	53.5045	51.0688	52.2758	52.4498	54.9236	53.5882	52.5213	52.0803	56.0116	56.81	59.9278	61.5787	65.8637	73.4652	76.8952	80.9129	86.2753	88.302	91.9611	96.5214	100.419	102.69	107.757	112.04	113.617	115.525	116.828	119.796	121.597	123.902	125.278	126.115
	37.773	38.1109	39.1903	39.0684	38.5629	39.3838	39.656	39.4184	38.8445	40.3574	38.6726	38.536	40.0384	40.2835	39.392	38.7449	41.0016	40.3878	39.2211	39.138	40.1896	41.4991	39.8314	39.5555	39.7752	42.2611	41.9298	42.0479	43.1332	44.909	47.0376	48.3444	50.4343	52.036	52.3281	53.2799	56.2987	57.9169	58.2056	61.5523	63.572	64.5843	65.4698	66.4671	68.8369	70.823	73.1034	73.8682	75.6237
	32.3346	32.6866	33.8053	33.4338	33.4248	34.5229	34.3242	34.5937	33.9477	35.5979	33.6088	33.4375	35.3056	35.518	34.7681	34.3275	36.2304	35.9294	34.4486	34.5498	35.7315	37.1157	35.4837	35.3718	35.838	39.1536	39.6087	41.0516	43.2257	46.0789	49.3452	51.7132	55.2051	58.5946	59.8007	62.3108	66.5193	69.3415	71.0283	75.4674	78.6662	81.0265	83.1984	84.9602	89.2851	92.0643	95.6578	97.3978	99.3216
	32.2064	33.0239	34.7207	34.0723	33.5122	34.8013	34.5585	34.7718	34.0975	35.5726	33.6904	33.7052	35.2487	35.9702	35.1177	34.7308	36.256	35.7659	35.4288	34.7665	36.1637	37.4576	36.0768	36.1578	36.5183	40.2295	40.0011	41.3537	43.1903	45.9338	49.2457	51.5437	55.6634	58.507	60.6814	63.4062	67.8242	71.0057	73.0311	78.6737	82.3573	84.0956	87.0078	88.8343	92.2782	95.6256	99.5319	100.901	103.222
	33.8401	34.5196	35.3557	35.2076	34.5075	35.5626	35.5803	35.7017	34.9658	36.5382	34.8351	34.9192	36.5099	36.4214	36.2797	35.5608	37.2157	36.7865	35.3334	35.7271	36.7634	37.9101	36.3443	36.4327	36.1702	38.3598	37.6437	38.6941	40.051	41.4607	43.7061	44.6429	46.5676	48.1814	48.7122	50.1406	52.7757	54.1922	54.9659	58.0964	60.2958	60.6257	61.8341	62.7272	64.4944	66.0225	68.3311	68.9945	70.0604
	50.3514	49.5245	52.7554	50.7418	51.2538	53.5737	54.9339	53.1826	52.4451	53.1114	52.5808	52.1563	55.5692	57.8498	56.3701	53.2774	55.3256	56.0785	53.6023	53.0428	55.9993	59.3896	56.2905	55.277	55.1032	55.6737	54.3903	54.9509	58.1565	63.0027	64.2642	66.4844	68.9714	72.3614	73.7513	75.2884	80.6249	82.1556	82.9349	88.5334	91.1373	91.1977	93.045	93.9768	96.5549	99.8947	101.393	102.045	103.593
	37.5883	38.3448	39.7298	38.8611	38.3598	39.8262	39.5604	39.5157	38.4564	40.8882	39.0644	38.8758	40.454	40.7878	40	39.4379	40.7512	40.4128	39.0549	39.0585	40.8332	41.9933	40.6135	40.3475	40.729	42.4208	42.5383	43.3737	45.5174	48.177	50.5057	52.7166	55.7969	58.753	59.6205	62.0952	65.6528	68.0075	69.1255	73.6246	77.1076	77.8644	80.1644	81.0937	84.2047	87.3724	89.4407	90.988	92.835
	30.1824	30.9077	31.933	31.3888	30.8865	31.7106	31.8697	31.9633	31.3277	33.2364	30.9076	31.38	33.0328	33.0127	32.3275	31.6314	33.4383	33.1561	31.9761	32.4246	33.1613	34.5463	32.768	32.8692	33.1794	35.5557	35.1695	35.5551	36.3918	37.7009	39.642	40.675	42.3676	44.0536	44.2884	45.0574	47.5359	48.9638	48.9598	51.5094	53.5572	53.5006	54.4673	54.9621	57.0169	58.4702	60.1845	60.5424	61.5774
	37.4235	38.1585	39.8259	38.6088	38.3256	39.5762	39.442	39.3053	38.7243	40.517	38.5807	38.9328	40.1067	40.1864	39.3346	39.2633	40.7381	40.479	38.9411	38.8478	40.0238	41.0066	39.5474	39.1821	39.4841	42.2113	41.7846	42.3944	43.7777	45.6667	47.5731	48.6196	50.3796	52.1359	52.4016	53.8779	56.974	58.0443	58.5282	61.6175	63.7728	64.9164	65.3668	66.998	69.0748	70.9652	72.9536	74.0638	75.2249
IKO 3	29.6582	29.8466	30.9459	30.9772	30.2118	30.5065	31.4499	31.6214	30.9705	30.588	31.4608	31.3586	31.9523	32.2951	32.4003	31.606	31.5901	31.6694	33.0974	32.5421	31.8286	31.8386	33.3134	33.177	32.4839	33.2274	33.7232	34.2242	36.3296	37.5144	38.9806	40.3157	41.5191	43.6062	45.1446	46.112	49.3977	51.0368	54.4619	55.3809	56.3903	59.5248	62.9249	64.9047	66.2476	67.2829	70.8926	74.3794	74.8133
	31.3133	32.1759	33.3162	33.2991	32.8228	32.7922	33.6127	33.4016	32.3074	32.7055	33.4232	32.6514	33.6491	33.6316	33.9617	32.9628	32.5646	32.427	33.609	32.7782	32.7007	32.5578	33.4056	33.6004	32.9654	34.0674	35.1869	37.0075	40.3753	42.6493	44.8662	47.4512	49.8202	53.5331	55.0715	56.2095	59.4413	61.5548	64.8382	65.7726	65.8945	68.6026	70.9868	71.6668	71.061	71.0672	72.9583	74.5141	73.6674
	25.9967	26.6087	27.9048	27.2591	26.3079	26.6094	27.788	27.5329	27.8587	27.2145	27.4917	27.2762	28.1402	28.1832	28.1183	27.8313	27.5509	27.5798	28.5192	28.0883	28.0571	28.1539	29.4975	29.3445	29.0942	29.3516	29.6438	30.3001	31.8093	32.8182	33.1971	34.0365	34.9822	36.305	37.391	37.8012	39.4718	40.6531	41.9374	42.3319	41.7456	43.5474	45.1827	45.3267	45.1276	44.439	46.8214	48.1929	47.456
	28.5053	29.1717	30.1563	30.1554	29.498	29.4818	30.5202	30.3978	30.5628	29.5742	30.5109	30.4224	31.0804	31.369	31.4381	30.9447	30.092	30.4525	31.567	31.1547	30.9155	31.0274	31.9075	31.9397	31.0883	30.7684	30.7379	31.4517	32.7683	33.6674	33.9535	34.9507	35.1843	36.3123	36.2773	37.0611	38.5405	38.9833	40.3383	40.2832	40.3006	41.7867	43.8867	43.893	43.6619	43.1323	45.0802	45.9604	45.8063
	29.1267	29.7332	31.1764	31.1963	31.1532	30.5533	31.7189	30.945	31.2494	31.0791	31.7725	31.3459	32.5313	32.0131	32.5021	31.4172	30.6691	30.7589	31.5828	31.6585	31.9006	31.5891	32.392	32.5628	31.1345	30.2762	30.2961	30.5566	32.203	33.4153	34.0866	35.2273	35.7375	37.5229	38.2125	38.8083	42.0062	41.732	44.3235	44.6217	44.6695	46.4827	49.588	50.1817	50.2141	50.2107	52.0596	53.518	53.6268
	31.3449	31.5244	33.1258	33.9465	33.6956	33.9064	34.912	34.564	34.1475	34.0429	34.781	34.7749	35.1747	35.3734	35.0977	33.89	33.6211	34.3912	35.206	34.6554	34.0269	33.3628	34.4024	34.4315	33.2028	33.3138	32.9908	33.3264	34.8439	35.3709	36.9677	36.9604	37.7821	39.3518	40.1339	40.946	42.3874	43.7643	45.2093	45.7083	46.9036	48.3454	50.6872	50.2009	50.0848	50.2874	52.4751	53.9484	55.0681
	38.1783	38.762	40.4216	40.7108	40.6916	40.5371	41.3836	41.7308	41.8429	41.6421	41.7211	42.1256	43.0539	43.1626	42.1753	40.4685	39.3926	39.8351	41.6868	39.8454	38.2727	37.1104	38.1773	39.0903	38.3094	39.0695	39.8333	41.402	43.1694	44.6256	48.9369	50.9703	52.7541	55.3987	57.8875	60.2836	62.854	65.0867	68.8023	70.8758	71.7137	74.8846	77.9436	79.0669	80.0851	80.3946	83.2241	84.9483	84.4503
	27.5237	28.2082	29.4061	29.3373	28.7065	28.8098	29.7207	29.3438	29.5554	29.7214	30.2369	29.8554	31.076	30.7693	31.2298	30.0001	29.2377	29.6868	30.8209	30.5224	29.7622	30.2548	30.9059	31.1938	30.1006	29.8001	29.6741	29.8087	31.5749	31.845	32.7356	32.9318	33.6212	34.7333	34.9226	35.0795	36.7995	36.761	37.8376	38.0124	37.8197	38.5307	40.8226	40.9539	40.4054	40.261	41.8369	42.8068	42.3051
	32.0635	32.3611	33.6266	33.2028	33.0753	33.3932	34.3753	34.2217	33.9769	33.9234	34.7245	34.7514	35.2795	35.5246	35.5523	34.1031	34.004	34.6202	35.4874	34.6581	34.5181	33.9609	35.4257	35.5915	34.2005	34.7082	34.7634	34.8822	36.7436	37.1692	37.8152	38.0127	38.6531	40.5103	40.8734	40.9594	42.8278	43.5967	44.8514	45.0489	44.8915	46.7863	48.3664	49.0649	48.1777	48.4241	50.5282	51.638	51.416
	35.1127	35.4958	36.5821	36.6058	35.9672	36.3209	37.2315	37.4102	36.9572	36.576	37.4369	37.4481	38.2114	38.2118	38.2344	37.4523	37.4574	37.5853	38.2236	38.0527	37.6143	37.4888	38.7332	38.5608	37.9026	39.0328	38.9427	40.2533	41.9279	43.0149	44.4159	45.3968	46.5318	48.1392	49.2166	50.2544	52.9531	53.9134	56.4454	57.2395	57.7874	59.7491	62.9859	63.5138	63.9006	64.0489	66.8558	68.1153	67.9397
	32.3085	32.552	33.88	33.5618	33.3035	33.6755	34.7859	34.4998	33.9132	33.5401	34.2467	34.2932	35.3041	35.5094	35.7232	34.8986	34.5584	35.0667	35.8799	35.7459	34.8921	34.8873	35.9711	35.7908	34.9465	35.3935	35.6149	36.4494	38.0367	38.5961	39.374	40.15	41.5625	42.866	43.6536	44.2941	46.5672	47.5589	49.7844	50.307	50.4199	52.7734	55.0234	55.7521	56.4648	56.6578	59.4731	61.1984	60.7942
	34.7038	35.8071	36.2736	36.9779	35.5288	36.1156	37.5021	37.8288	37.7639	36.7915	37.7224	37.179	38.0871	38.2432	38.1307	37.5451	36.9632	37.7383	38.4865	38.9588	37.9524	38.1956	38.7217	39.0452	38.2871	39.4702	38.6444	38.9989	40.2788	41.4718	42.7285	43.2515	44.4268	45.4343	45.5782	45.3291	47.04	47.668	49.2433	50.6762	50.0168	51.5125	54.3655	54.9327	54.936	54.2828	56.5046	59.0691	57.9886
	29.617	29.9216	30.7671	30.7659	30.1277	30.4834	31.5382	31.7157	31.2241	30.7088	31.8619	31.7529	32.5544	32.8981	32.8134	32.0164	32.1077	32.3995	33.5334	33.1176	32.6052	32.704	33.9496	34.1453	33.1801	34.2908	33.9203	34.496	36.0699	36.3649	36.9132	37.2063	37.8009	38.8187	39.3208	39.6355	40.9558	41.6008	43.0028	43.1998	42.889	44.5907	46.4517	46.662	46.5706	46.2731	48.2026	49.4006	49.3421
	30.2455	30.1564	31.3731	30.84	30.026	30.1946	31.8173	31.6509	31.3077	30.6642	30.9468	31.0418	32.3354	31.8905	32.0383	31.6585	31.2557	31.742	32.6762	32.2166	31.5938	31.3018	32.6302	32.6405	32.1335	32.6961	32.2227	32.818	34.3723	34.7905	36.5662	36.1547	36.9062	38.0204	38.4775	39.2163	40.3393	40.8925	42.2212	41.9976	42.0201	43.8408	44.8277	45.3128	44.3678	44.3543	45.6373	48.2219	47.3987
	31.7869	31.9621	33.2096	33.1552	32.4686	32.6721	34.048	33.915	33.7161	32.9924	33.7204	33.6995	34.5708	34.9602	35.1253	34.0993	34.073	34.4619	35.7897	35.2059	34.7357	34.7693	35.9578	36.0687	35.2859	36.2035	35.9676	36.2719	37.9239	38.4833	38.905	39.5132	40.2437	41.1211	41.6691	41.9435	43.7974	44.2999	46.2524	46.5476	46.3339	48.0848	50.209	50.3497	50.5311	50.3845	52.6011	53.858	53.239
	34.7964	35.0135	36.2449	35.846	35.6333	36.2311	37.0989	36.8372	36.4599	35.9142	36.8945	36.9268	37.6514	38.0336	38.3959	37.358	37.1617	37.4682	38.9652	38.6511	37.5177	37.5883	38.3719	38.1326	37.3984	38.1054	38.137	38.7848	40.1807	40.6284	41.1046	42.3906	43.3644	44.6501	45.1848	45.4915	47.6305	48.5921	50.4413	50.5853	50.412	51.8224	54.3277	54.9043	55.0239	54.8203	57.2194	58.4558	57.6707
	37.1284	37.9151	38.8292	38.6909	38.1981	38.8297	39.4678	39.2169	38.8332	38.4197	39.049	39.0967	40.0871	40.1761	39.827	39.273	39.1766	39.444	40.7841	39.9853	39.4566	39.6366	40.5288	40.4251	39.8723	40.8142	40.6925	41.2579	42.8531	44.0403	44.9411	46.2336	47.2446	48.7097	49.2854	49.834	52.5899	54.199	56.3943	56.6285	57.3985	59.1214	61.8776	62.7562	63.2315	63.4325	66.2679	67.4776	67.751
	32.2691	32.8656	33.8757	33.8646	33.6504	34.0564	34.4982	34.261	33.6338	33.3977	34.1955	33.744	34.4869	34.995	35.1725	33.8355	33.8391	34.2764	35.3292	34.8307	34.1732	34.7165	35.6385	35.4077	34.5443	35.3879	35.1264	35.4034	37.9079	39.3894	40.3858	41.7059	42.813	44.9516	46.1451	47.3486	51.134	53.1038	55.4545	56.4892	57.7798	59.8801	63.122	64.1649	65.0227	65.8315	69.3057	71.1583	70.7928
	29.6186	30.0931	31.1031	30.9307	30.4018	30.6202	31.8625	31.5916	31.2981	30.8588	31.6669	31.5004	32.262	32.4265	32.5663	31.9181	31.6949	32.0109	33.165	32.5082	32.0669	32.0064	33.2755	33.2027	32.5468	33.4443	33.112	33.799	35.224	35.7544	35.9327	36.8177	37.6289	38.7827	38.9621	39.4084	41.193	42.0058	43.5316	43.7962	43.432	45.1605	47.185	47.4227	47.8064	47.4329	49.8164	51.3218	50.7598
	37.6739	37.8329	38.6627	38.3827	37.4516	37.3861	38.4834	38.2402	37.6732	37.2918	38.9354	39.093	39.8494	40.1043	40.3827	39.9252	39.4778	39.2944	41.1376	39.5428	39.6908	39.765	41.9162	41.3859	40.6571	41.6996	42.0238	42.8299	45.2671	45.7911	46.3551	47.3868	48.9149	50.1759	51.5191	51.7163	54.3643	55.6869	58.4262	59.295	59.2778	61.978	65.0132	66.1221	66.9948	67.6603	71.1795	72.6297	73.0392
	35.6406	35.4025	36.8201	36.9948	36.3738	36.5882	38.0526	37.5513	37.7334	37.0329	38.0909	38.0789	38.5902	38.837	38.9875	38.4578	38.0261	38.2507	39.6185	39.2101	38.6389	39.2485	40.5004	40.8002	40.0291	40.148	40.4733	41.097	42.5251	43.547	44.0997	45.0009	46.6538	48.1736	48.9858	50.1886	53.5783	54.6229	57.0696	58.7212	59.1451	61.4306	65.1389	65.7769	67.2247	67.6553	71.1551	72.7823	72.7287
	27.1714	27.7941	29.0232	28.8179	28.064	28.2095	29.3772	29.1924	28.7951	28.2911	28.6906	28.6194	29.3045	29.5483	29.7262	28.7791	28.5855	28.7074	29.8081	29.171	29.1246	28.9714	29.8158	29.9103	29.245	30.8819	31.2455	32.3802	34.3337	35.2796	36.2177	37.2144	37.9635	39.5941	40.2334	41.3558	43.5819	44.3691	46.4637	47.1648	47.2426	49.5671	51.8144	52.2134	52.4272	52.5572	55.0481	56.2161	56.1004
Time (s)	0	2	4	6	8	10	12	14	16	18	20	22	24	26	28	30	32	34	36	38	40	42	44	46	48	50	52	54	56	58	60	62	64	66	68	70	72	74	76	78	80	82	84	86	88	90	92	94	96
[truncated: 277 more columns]

## Sheet: Panel H
WT	29.6242	29.4375	29.407	27.9126	29.4604	28.2291	27.503	28.4852	28.3586	28.0648	28.088	27.6314	28.7454	29.1967	30.0673	29.2939	28.6437	28.3657	30.4911	30.256	29.6725	31.7917	32.4894	32.5351	31.8204	36.4785	38.4181	39.4002	40.8559	41.3044	41.3146	42.0926	42.5457	46.0584	47.1247	48.5471	47.2188	49.5565	50.2346	50.5709	50.273	51.1638	52.7672	54.2596	54.6421	54.4552	53.1696	54.4313	55.0553
	15.6475	14.9984	14.9217	13.7753	14.8783	14.3528	13.2021	14.0534	14.2272	13.875	13.8533	13.448	14.4687	15.2359	15.3071	15.1139	14.4944	14.17	15.1554	15.5359	15.493	15.7325	16.4657	16.3372	15.9758	18.7904	20.6485	20.8133	21.7608	23.4426	23.9046	23.8993	23.773	26.7478	29.1107	32.6439	34.2156	39.4899	42.814	45.9549	45.9189	47.9987	53.2291	59.4432	64.326	65.7824	63.4228	65.9175	71.0259
	18.8789	18.797	19.0522	17.5273	18.5282	18.0294	17.1442	17.8114	18.0288	17.311	17.4492	17.6931	18.7473	18.767	18.9497	18.6552	17.6987	17.7866	19.0908	18.6103	18.2053	19.5737	20.3682	20.4508	19.999	25.6055	28.1631	29.2254	30.705	31.6916	31.0063	31.4703	31.3937	33.0246	33.038	33.8875	32.256	33.7303	34.0696	33.9516	34.7236	34.045	35.2956	36.5935	36.2481	36.8657	35.6492	36.9333	37.2074
	33.0289	32.8368	33.0052	31.1265	32.578	31.4468	30.8133	31.7121	31.8619	31.408	30.9045	30.7242	32.3568	32.3357	32.8511	32.1867	31.9451	31.2493	33.4307	33.004	32.8508	34.759	35.6407	35.8707	34.99	94.5326	123.309	148.318	157.28	162.304	156.959	152.365	149.917	146.362	139.911	140.211	135.63	133.426	129.637	129.231	122.782	120.149	118.779	119.797	117.403	118.39	110.112	111.836	109.797
	25.4068	25.074	24.8936	23.5328	25.2095	23.8629	23.4377	24.1676	24.712	23.8477	23.6933	23.9927	25.2339	25.3916	25.8021	25.4228	24.4677	24.5079	26.0946	25.4445	25.2911	26.9379	27.3321	27.8187	27.0689	31.5756	34.1761	36.5778	38.7694	39.5448	39.5696	40.6804	40.878	42.0006	42.7965	43.7885	42.4577	43.9319	42.8107	42.8011	43.5027	43.0736	43.9669	44.0278	44.4995	44.2475	43.266	44.0102	43.6468
	35.3328	34.8384	34.3578	33.5529	34.6847	34.3253	33.0077	33.8221	33.8757	33.6329	33.539	33.5221	34.8784	34.8666	35.6928	34.9945	34.5631	34.6869	36.4211	35.6701	35.506	37.4981	37.3856	37.8335	37.0228	57.7553	86.3448	132.468	140.097	148.802	142.581	141.777	138.205	141.184	135.499	132.715	124.411	123.763	115.401	109.893	113.144	109.009	109.974	108.14	115.706	112.326	105.228	107.699	102.471
	22.0183	21.7419	21.8365	20.029	21.8509	20.7535	19.9765	20.6736	20.5906	20.594	20.5447	20.6886	21.6386	21.7335	22.2266	21.7213	20.8819	20.6098	22.2998	21.8101	21.1678	22.8655	23.1555	23.3411	22.3372	34.2513	45.7915	54.8757	70.2412	74.7914	80.355	84.8699	81.6801	82.596	81.0978	79.4926	78.3275	76.9044	77.1876	76.6373	72.58	69.5339	69.956	67.3635	67.0881	64.7547	64.307	63.9339	62.0355
	28.4234	28.087	27.7243	26.7434	28.3979	27.5924	27.2017	27.7121	28.1906	27.6079	27.1528	27.0257	28.532	28.6028	29.369	28.8902	28.3818	28.4168	29.9025	29.7088	29.3701	30.962	31.4492	31.1374	30.4187	115.433	145.045	156.892	157.363	156.082	154.596	146.813	147.646	139.822	137.17	138.379	130.095	123.768	119.144	119.191	120.246	112.541	113.09	113.431	111.125	110.732	110.399	105.717	98.7133
	32.296	31.1458	31.3112	30.001	31.607	30.1759	29.5105	30.2806	30.573	30.2125	29.6541	29.7871	30.8153	31.0118	31.8197	30.8674	30.108	30.3297	31.7975	31.0177	30.9693	32.5754	33.7552	34.3624	33.7916	61.7349	79.4845	103.808	118.098	126.836	131.537	136.631	136.841	141.103	141.689	138.815	137.101	133.844	126.042	124.929	124.888	120.488	116.984	116.244	113.324	107.534	103.168	107.421	103.588
	29.5375	29.7036	29.7129	28.0444	29.162	28.8389	27.5541	28.5311	28.179	28.2799	28.0006	28.2013	29.3383	29.6388	30.0029	29.2436	28.7409	28.5938	30.5631	29.8276	29.3749	31.2592	31.6161	31.6351	31.6732	38.7072	43.9199	49.7438	55.5179	56.4078	56.7428	59.8908	62.2296	67.5206	70.389	69.6702	68.4358	71.8055	73.6324	74.6508	74.7964	74.0601	73.3159	71.926	69.3814	68.9749	66.0325	66.8497	65.7261
	21.8477	21.679	21.7226	19.8665	21.6578	20.3872	19.8053	20.293	20.6137	20.5431	19.9326	19.9761	21.1621	21.0567	21.5005	21.0983	20.1388	19.7978	21.6715	20.9982	20.1063	21.6745	22.396	21.8395	21.3433	27.0479	32.2396	37.8256	51.5455	56.3819	63.4624	68.7843	71.4454	74.5931	75.3765	74.846	73.1716	72.8592	69.9164	68.0332	65.5583	63.4946	61.5191	59.2814	57.9503	56.524	55.5303	56.687	55.494
	23.5037	23.4593	23.4505	21.8217	23.544	22.2479	21.934	23.1573	23.0236	22.6965	22.2004	22.2738	23.6878	24.1077	24.1148	23.9981	23.6383	23.2447	25.2832	24.3481	23.9827	25.2955	25.6452	25.49	25.1215	39.9653	60.3097	79.5747	92.1001	97.1678	101.925	111.031	115.496	116.77	112.662	108.346	105.174	106.593	103.849	102.183	100.445	95.1446	93.7821	94.0861	88.2703	86.3425	84.1373	80.1549	78.1592
	34.8478	34.6848	34.6796	33.1026	33.8671	33.267	32.3211	33.3416	32.99	32.7965	32.7166	32.7821	33.5597	34.3141	34.9143	34.1143	33.7922	33.2893	35.8208	35.4679	35.5865	37.6277	38.3576	38.5782	38.1997	46.028	60.0678	87.2118	106.027	119.747	140.619	155.265	162.115	160.303	160.401	159.464	156.657	153.115	145.397	142.093	140.118	134.743	130.214	132.167	126.772	121.779	120.254	121.437	116.892
	45.2447	44.0338	44.2144	43.7168	43.9395	46.1164	44.9627	45.247	43.825	44.6005	44.7305	45.001	46.01	45.2056	45.8918	45.8088	45.9864	46.0945	45.9861	43.9643	44.7375	45.5752	45.3824	45.8358	46.7471	94.3683	99.8008	98.3517	95.0102	89.7677	90.19	87.5549	85.0192	81.0698	78.7458	74.8358	74.7348	73.7062	72.2317	70.8979	70.3085	66.6626	66.376	63.9837	63.1794	64.2056	62.3495	59.0274	58.1902
	48.9811	47.864	48.0228	47.8657	47.9022	49.6786	48.2804	48.6191	47.1338	47.5341	48.2685	48.0857	49.5149	48.5129	48.5311	49.3039	48.8394	49.316	49.1432	47.2363	47.4852	49.2927	48.7423	49.6793	50.3527	77.8099	86.1147	88.284	86.5484	83.9535	83.6335	83.2514	78.1692	75.6949	73.3326	71.6601	69.1775	69.7811	65.9947	64.3434	64.2547	60.4466	60.3171	57.8154	58.8031	56.6476	55.8492	53.5838	51.0975
	52.9181	52.9231	53.2659	52.9576	52.9699	54.8521	54.06	53.6756	53.5324	53.1058	53.2992	54.4338	54.7104	53.6112	53.6643	54.7765	54.4256	55.3452	55.2939	53.2369	53.8554	54.5118	54.3036	55.4578	53.4617	70.7907	82.6471	84.0418	82.7122	80.9969	77.6701	76.5845	73.3096	69.1332	68.3974	66.3488	63.6424	63.5722	60.2199	60.6241	60.9774	57.4528	55.4363	51.9625	54.3332	52.0245	52.6279	49.1761	45.5499
	45.642	45.365	46.0367	45.2783	45.3645	47.7809	46.2625	46.6612	45.1149	45.0713	45.611	45.5485	47.1562	45.5302	45.6786	46.2091	46.7471	46.2225	46.1367	44.2927	45.0704	46.3728	45.3214	46.3396	45.6936	62.4162	69.9136	72.4363	71.6608	69.3044	68.4794	68.0726	66.4926	63.0662	61.1668	59.5586	58.6242	58.0076	56.0721	54.9495	54.9283	52.1835	51.552	49.341	50.0732	48.9799	48.3681	46.8229	45.051
	42.8659	42.1728	42.7116	41.8382	41.8201	43.9654	42.9743	43.1949	41.6292	42.274	42.5762	42.8194	43.721	42.7968	43.75	43.8498	44.0887	44.0482	44.0221	42.2235	42.5469	44.5177	43.5419	44.1498	43.0617	54.1056	61.245	63.7006	63.6713	61.9791	61.6496	61.0314	59.6109	57.7875	55.7805	54.1652	53.3817	52.6403	50.9454	51.2311	50.9135	48.7009	48.3299	46.1781	46.4991	46.438	45.6363	43.8849	42.4246
	32.3196	30.9384	31.718	31.4172	31.3538	32.2126	32.0256	32.1457	30.8719	31.215	31.4309	31.514	32.7064	31.8788	32.212	32.1792	32.9548	32.7063	32.3487	31.2879	30.8164	32.0193	31.9046	32.6128	30.3161	38.4759	42.873	43.6868	43.14	43.0955	44.1109	44.1236	43.7947	42.2307	40.386	40.9591	39.4061	40.0117	39.8219	38.9735	39.2258	38.5755	38.2869	36.1345	37.3593	36.964	37.5662	36.2139	34.9597
	33.1438	32.1437	32.874	31.6248	32.1812	33.7593	32.7545	32.6018	31.5264	31.9286	32.0674	32.3263	33.3627	32.5699	32.4839	32.5721	32.6534	32.8616	32.8191	31.1971	31.2106	32.1305	32.0156	32.8572	31.381	90.6654	124.64	133.546	130.352	116.323	109.805	103.303	93.002	84.8851	81.0783	79.4419	76.793	73.3545	68.9073	66.0588	62.4937	59.3307	57.0188	53.2705	52.8457	51.5293	53.0125	50.0053	49.3902
	43.8097	42.8137	43.1474	42.7794	43.2684	44.871	44.0632	44.4188	42.9663	43.4475	44.1416	44.4568	45.6455	43.9785	44.5755	45.0761	45.2996	44.9577	45.1395	43.799	44.0264	44.7904	44.9192	45.6793	43.9721	34.9727	41.1244	45.3778	46.3107	46.9703	48.1812	48.521	47.9779	46.5144	45.4462	44.4349	43.8244	44.0147	42.7403	42.7673	42.7465	40.8555	40.5073	39.0388	39.5252	39.399	39.1287	37.5845	35.9749
	34.1111	33.3603	33.4627	32.7389	33.2377	34.7137	33.6943	33.9824	32.6929	33.2044	33.1611	33.5023	34.8654	33.9485	33.683	34.2257	34.3119	34.2458	34.0294	32.7944	33.1489	33.8268	34.104	35.0369	34.0791	83.3543	98.2575	104.85	102.02	97.914	97.2723	98.4707	96.1981	92.713	88.6667	87.5782	85.825	83.7532	81.5442	79.7217	80.4062	76.1488	75.4947	72.4673	73.3617	71.4218	69.8935	67.3194	65.3913
	55.4643	54.3597	55.3129	54.2786	54.84	56.6448	55.6536	55.184	54.726	54.8797	55.3142	55.3158	56.8924	55.5267	55.6408	55.6798	56.4085	56.1368	55.4553	54.8441	54.2695	55.8005	54.97	55.9135	51.653	43.5577	50.029	55.7485	56.8195	57.5283	60.2696	61.1166	59.9532	59.518	57.4649	56.5243	55.1067	54.3358	53.6858	53.032	53.8529	51.1271	49.4543	48.1973	47.3395	47.0899	45.8124	43.6988	43.0462
	53.7428	52.9877	53.374	52.3552	53.1008	55.0057	53.6705	54.1862	52.4961	52.8044	53.1479	53.1378	54.9911	53.0625	54.2284	55.0611	54.9785	55.1808	54.5698	52.6877	53.3478	54.5855	54.0982	54.9752	52.1384	43.2041	54.4562	63.4412	68.955	71.8891	72.276	73.2238	71.1239	66.1571	65.6573	64.7304	63.4355	61.9833	58.8353	56.7889	56.0981	52.7341	53.6202	50.6398	49.1981	47.9707	45.7587	44.3224	43.6166
	43.6322	42.9592	43.5023	42.68	43.3498	44.5336	43.8444	43.3597	42.3203	42.5484	42.6791	43.7526	44.6569	43.3221	43.7156	44.3347	44.5411	44.2855	44.1885	42.9004	42.8574	43.6872	43.7256	44.3247	44.7864	32.1509	38.7304	43.7199	45.4689	46.1755	47.4043	47.7156	47.0655	45.8247	43.9498	43.8613	42.8515	42.7967	41.5604	40.9143	41.1712	39.2483	39.0226	37.0313	37.6448	37.4952	37.3399	35.6556	34.1943
	44.2479	43.4689	44.331	43.9598	44.9316	46.8784	46.3545	46.1531	45.3544	45.7911	46.1102	46.6174	47.6314	46.7269	47.3469	46.9733	47.0567	46.2797	45.937	44.2091	44.2167	45.0151	44.9929	45.6364	44.8832	34.8772	41.8407	45.9433	47.2593	46.6587	47.603	47.8184	46.8711	45.1706	43.6367	42.809	42.1674	42.3819	41.0926	40.8844	40.8516	38.9139	38.761	36.9413	37.8191	37.5481	37.2847	35.701	34.3497
	59.2512	58.3032	58.2273	57.7973	57.4895	59.6954	58.3496	58.6285	57.1534	57.4676	57.9903	58.4818	59.6741	58.5671	59.2111	59.8303	59.6083	59.6352	60.0825	57.8527	58.1042	59.7901	58.6835	60.0416	55.8596	69.4287	77.5206	82.2131	82.3293	82.51	82.0229	81.8608	81.3199	78.3928	75.5309	74.4	73.2895	73.3908	71.7539	71.3136	71.4506	68.3385	67.5936	65.3642	65.6741	65.4626	64.2718	62.3367	61.0489
	27.955	27.1066	27.385	26.4307	26.8763	28.2804	27.3467	27.1638	26.4063	26.2701	26.5699	27.1835	28.0331	26.71	27.1206	27.1514	27.7379	27.2495	27.3286	25.8651	26.0805	27.4646	27.0945	27.725	27.6086	81.7741	90.8548	92.9904	92.6979	89.5804	88.9316	88.6805	86.1153	81.3225	78.8169	78.206	76.1043	75.5599	73.3165	72.4521	72.3331	69.45	68.4106	66.0332	65.8695	64.8761	64.4466	61.7444	60.2167
	38.0731	36.9569	37.99	36.9428	37.1757	38.9724	38.1573	37.6785	36.9717	36.8389	37.2234	37.7391	38.9689	37.8578	37.8888	38.7038	39.0164	39.1657	39.1376	36.8793	37.8258	38.5957	38.1967	39.2644	39.6101	57.6016	62.8645	63.6412	63.0113	60.9108	61.1167	61.8438	61.3042	58.5925	57.2652	56.8492	56.1952	56.7852	55.0598	54.5453	54.6937	53.2036	52.3637	51.3222	51.9054	51.3977	50.9287	49.4526	48.3442
	26.8279	25.9122	26.3259	25.6126	26.0474	27.327	26.2345	26.5621	25.8361	25.3289	26.1061	25.8484	27.0911	26.4829	25.9105	26.3706	26.9762	26.6658	26.5877	24.2933	24.9466	26.1804	25.7268	26.491	24.787	109.883	119.729	121.797	119.122	116.76	112.149	112.488	105.805	101.839	96.3399	94.2343	93.3821	90.884	86.911	85.8117	84.949	83.171	79.3409	77.3201	77.148	76.1061	74.4315	71.7371	69.6711
	38.2338	37.596	38.1266	37.4376	37.2837	38.8487	38.2438	38.321	37.2586	37.1083	37.7347	37.7812	39.1709	38.1423	38.0561	37.9868	38.4943	38.5562	38.5848	37.1359	37.3131	38.4339	38.1064	38.9449	37.7673	34.6169	41.0588	44.7738	46.0441	45.8589	46.415	47.0338	46.0841	44.3555	42.9289	41.9714	41.4738	41.5141	40.5444	40.2371	40.6102	38.9028	38.2899	37.0174	38.2959	38.1555	37.788	35.6014	34.6363
	44.0027	42.9287	43.3273	42.5686	43.0214	44.7171	43.2977	43.6906	42.2583	43.0722	42.9408	43.412	44.4868	43.1987	43.5379	43.9715	44.0306	43.813	43.3146	42.052	42.1127	43.4449	42.5954	43.7602	42.4991	62.0033	79.8734	95.8085	101.604	100.39	98.497	96.3046	92.2379	85.0736	80.0239	77.4917	75.848	73.1251	70.5664	69.2856	67.8408	62.8811	61.1621	59.0479	61.0007	59.5704	58.7406	55.9424	56.0417
	39.8704	39.4645	39.8963	38.8134	39.1607	40.3335	39.7147	39.4132	39.0857	39.1675	39.3738	40.2395	41.362	40.5232	40.5087	41.0043	41.283	40.4907	40.3284	38.975	38.7764	39.8062	39.8533	40.6797	38.9577	95.5738	96.542	94.6545	89.7384	82.5731	81.3747	78.3545	80.3861	78.2801	75.9646	71.5167	72.2215	73.1614	71.8741	69.9078	70.9176	68.6817	69.3131	65.4418	68.4195	68.3187	66.7158	65.1577	62.528
	41.2061	40.3057	40.9616	40.1078	40.3738	41.1551	40.6747	41.0144	39.5207	39.8883	40.4611	40.5514	42.3447	41.5343	41.6703	41.6959	42.5652	42.1913	41.7107	39.55	39.9039	40.9177	40.4176	41.6484	41.7207	52.0895	55.2539	57.9203	56.8907	55.7834	57.2999	57.1467	55.8894	54.4107	52.0533	53.3205	53.8078	53.814	52.881	52.2881	53.9352	52.0539	51.5541	50.298	51.4455	51.7013	51.5804	49.516	48.9026
	36.8482	36.0456	37.0362	36.1199	36.4822	37.8546	37.1009	36.985	35.7433	35.8483	35.9915	36.1768	37.133	36.2444	36.4634	36.9489	37.1139	37.122	37.2386	35.1786	35.9527	36.5608	36.5267	37.2064	36.833	78.0409	86.6474	89.3393	86.7924	84.4583	82.2193	82.9017	80.2601	77.0778	74.8883	72.4081	72.9337	73.0555	71.3929	70.1692	70.6501	70.8187	68.9465	67.7095	67.9172	68.1683	66.4468	64.6517	62.7778
	39.1346	37.8611	38.5901	37.8837	37.8376	39.291	38.2852	38.6548	37.2109	37.7436	37.8364	37.8943	39.0276	38.1827	38.4002	38.5937	39.1807	38.8793	38.9573	37.0368	37.2776	38.6977	37.9619	39.1364	37.2208	74.1732	80.6828	82.4433	81.5144	78.6361	76.3755	76.0705	75.2285	71.983	71.3595	68.7749	68.2495	69.2271	65.0641	65.971	66.0512	64.4991	62.8998	61.3173	62.6906	62.2845	60.8266	58.9712	56.5042
	35.9411	34.8854	35.2751	34.6968	34.7495	36.7044	35.8812	35.5522	34.7163	34.6166	34.9921	35.472	36.6174	35.7049	35.7782	35.9879	36.1383	36.0898	36.1979	34.5675	34.6038	36.1568	35.4708	36.3507	35.634	107.99	110.968	105.261	100.132	92.0543	88.3437	84.6735	82.0095	76.5087	71.9248	70.4831	70.863	70.967	69.3044	70.3282	70.755	69.0428	66.7986	66.3401	66.4924	66.2081	64.8285	64.0026	64.2232
	42.1781	41.4198	41.7774	41.1651	41.6429	43.0817	41.3648	41.8886	40.713	40.9472	41.1018	41.9199	42.5386	41.623	42.1617	42.4404	42.7035	42.6646	42.6475	40.6381	41.3948	42.0419	42.562	42.7579	41.5323	93.0877	99.1001	101.39	97.1328	92.8691	90.9178	90.2138	86.7329	82.7588	81.1719	79.8978	80.3291	79.6548	80.5093	77.5962	80.0935	75.5828	75.6499	72.1679	71.8813	70.9606	71.4998	68.6512	68.0364
	28.0849	28.8436	29.8981	27.3673	28.3603	26.8268	26.833	28.3926	28.8034	28.4882	27.1799	27.293	27.1644	27.1457	28.5301	27.7201	26.6325	26.2419	26.6242	26.892	27.5406	28.1918	26.8906	26.1087	25.7249	38.0774	38.1622	46.0758	51.0422	58.2089	66.2913	75.4808	81.0019	85.356	84.18	86.4782	87.0274	91.4124	94.6894	90.294	88.6091	85.7319	80.2773	76.3067	74.6658	71.7823	70.728	71.9714	67.908
	69.4033	70.5675	72.5212	69.3801	69.519	68.4102	68.5588	70.8807	70.7172	71.9021	69.6996	69.4735	69.55	70.2251	71.3035	70.3027	69.0432	68.4656	68.6887	69.4023	69.0692	70.3274	69.1977	68.5228	68.2901	144.948	171.774	196.058	200.959	200.677	192.038	198.3	184.936	183.043	170.909	171.123	169.719	163.167	162.374	161.597	159.859	161.165	157.749	149.238	142.429	146.498	145.811	143.743	137.721
	62.7144	63.6063	64.7045	61.251	62.2081	61.3454	60.7505	63.484	62.3953	63.4803	61.4485	61.408	62.3439	62.6942	63.8329	63.0445	61.4662	62.1064	61.9816	62.2297	62.1629	62.8867	62.1558	62.0646	61.4601	97.2517	112.48	113.662	129.021	129.553	135.433	136.693	132.43	137.401	135.349	139.855	136.428	129.21	131.178	137.862	132.61	133.829	124.612	127.378	125.207	117.881	123.32	123.909	121.879
	44.0052	45.3724	46.2259	43.6532	44.1731	43.3757	42.9981	44.5897	44.3963	44.6508	43.2769	43.4607	43.6834	43.6608	45.6502	44.6767	43.5696	43.6079	44.0267	44.2675	44.7912	45.3548	44.1586	43.5257	43.4736	52.47	54.0163	57.1831	63.4094	67.992	74.889	80.2293	82.8349	91.5616	91.9566	99.7522	104.363	99.4716	99.847	105.854	103.975	108.75	104.883	103.015	103.35	107.201	104.093	101.957	103.6
	65.9135	67.7858	69.0716	66.1685	66.6941	65.6618	65.2692	67.1431	66.6399	67.8414	65.8479	65.6611	66.2818	65.7503	67.7241	66.8134	64.7924	65.3097	65.9786	65.9572	66.6808	67.0468	65.6167	64.9199	65.1875	159.867	179.221	172.008	172.992	180.391	175.297	168.098	166.853	162.965	170.909	158.947	155.822	157.077	149.23	142.134	148.552	142.904	143.467	141.729	138.131	135.768	140.479	131.925	130.739
	25.6415	26.1118	27.2983	24.4742	25.2593	24.5567	23.7496	25.6684	25.215	25.8218	24.0607	23.8074	24.2636	24.268	24.858	24.0446	23.1757	23.4282	23.3479	23.6933	24.6106	24.4363	23.6926	23.2312	23.0451	32.3211	36.7721	44.9467	55.5333	67.0544	80.2946	91.4359	99.6629	103.734	106.065	107.212	106.332	105.589	107.368	105.157	101.011	100.613	96.7885	91.7549	90.0095	86.7784	86.8942	85.7864	83.8985
	29.924	30.2375	31.8027	29.6026	30.2891	29.2104	29.2747	30.3011	31.2456	31.2155	29.8268	29.9499	29.9067	30.1592	31.5502	30.3876	29.9814	31.0622	32.2453	32.8993	33.4803	34.3874	32.7306	31.8437	31.2892	64.3368	125.4	160.198	171.815	171.028	166.937	168.652	150.83	138.734	140.82	133.936	128.902	126.771	124.961	122.003	113.95	116.507	113.491	112.021	112.097	109.04	102.978	98.7516	102.82
	29.4296	30.6766	32.0262	29.6957	30.3963	29.6065	29.7445	31.4793	31.9267	31.9407	30.6229	30.5514	30.5488	30.9232	32.3372	31.2326	29.7741	29.5242	29.8651	30.1066	30.8781	31.1843	30.0587	29.3506	29.0448	32.6134	32.0427	31.834	32.2405	32.906	32.866	35.8032	34.6672	34.08	33.6618	34.3553	34.0319	34.5045	35.2819	36.0088	35.8556	36.1437	35.8499	35.2526	35.9612	36.8272	37.2194	37.8449	37.018
	22.9245	23.6028	24.6184	21.809	22.6269	21.7487	21.4455	23.1387	23.4333	23.2871	21.7437	22.3319	21.758	21.862	23.3047	22.1787	20.8198	20.7152	20.978	21.1711	21.8747	22.2604	21.1386	20.6815	20.4649	28.4611	29.2504	29.9573	31.9732	36.1419	38.9999	47.849	48.7032	58.8418	67.5522	76.6522	79.0481	82.9847	82.9703	87.5568	84.1803	86.6975	84.9688	82.7991	80.1413	77.2795	76.0558	74.6882	75.187
	12.0639	13.0706	14.1085	12.0112	12.789	11.9327	11.6448	13.1559	13.6137	12.9623	12.1486	12.1786	11.9846	12.5717	13.322	12.9158	11.6634	11.2455	11.6559	11.9386	12.7316	12.9163	12.0416	11.5129	11.5233	36.9107	48.0495	60.9755	71.6681	80.2335	84.4484	93.7762	95.2801	94.5689	93.1607	95.6037	94.5728	96.9171	95.9961	96.8316	94.6942	95.1393	92.2567	90.6566	91.9356	89.426	89.0291	88.4459	84.5159
	44.1433	44.4635	45.3939	42.9604	43.7794	42.0328	42.8721	44.4212	44.2286	44.4752	43.0641	43.3417	43.3974	43.3336	44.2438	42.6786	42.3684	42.1271	42.0146	42.6345	43.332	43.2583	42.0771	41.8905	41.6054	116.131	137.311	150.271	156.158	148.804	146.547	142.483	134.211	129.909	124.961	125.519	123.78	125.923	124.34	126.955	121.523	128.803	121.796	123.179	118.759	117.311	118.858	114.79	113.106
	29.7329	30.2961	31.8791	29.1463	30.0902	29.438	29.3133	30.816	31.0093	30.7026	29.9058	29.4842	29.9118	30.0701	31.874	30.324	29.5354	29.9409	29.5821	29.9186	30.8958	31.1027	30.3461	29.0652	29.2556	42.8155	43.8289	43.4997	44.7156	45.431	44.9231	49.1773	48.9319	47.6074	48.4642	50.291	48.9521	48.7932	51.7782	52.0699	50.5548	50.0067	48.5815	48.4118	49.186	50.2538	51.9591	51.4877	48.8443
	35.2747	36.3073	36.9611	34.2695	35.1928	34.2549	34.3074	35.6136	35.752	35.9598	34.7858	34.634	34.5894	35.5858	36.4376	35.7324	34.4383	34.8044	35.2593	35.4052	36.6413	37.348	36.7408	35.4836	35.1052	43.71	47.5342	49.8627	60.1611	61.4272	63.6694	74.3408	76.0925	78.1501	82.3291	87.4525	88.1192	86.4166	87.4092	92.1557	93.2555	91.0873	87.3094	86.5349	89.6576	89.7298	87.0324	85.7879	85.8043
	43.0216	44.1836	45.4284	42.4963	43.3326	42.4425	41.9664	44.4977	44.4093	44.3804	43.0942	43.4771	43.4516	44.2785	45.8009	44.7913	43.2534	43.4988	43.6521	44.0446	44.9045	45.7985	44.1487	44.0482	43.7445	56.4479	84.3713	101.913	118.827	120.567	127.827	131.313	131.954	131.493	130.926	130.771	127.445	130.936	132.263	132.044	130.737	129.025	127.963	130.912	123.959	121.903	119.338	124.994	122.496
	23.8671	24.7298	25.5928	23.3828	23.9244	23.169	22.8559	24.6524	24.7583	24.709	23.3176	23.2603	23.6215	23.6118	24.7637	24.0085	22.8834	22.7255	23.0393	23.3887	23.8067	24.267	23.4056	22.6763	22.4983	36.291	45.5812	53.4723	59.3908	62.7759	66.8916	71.8931	70.3036	68.6431	67.0595	68.6779	68.0325	66.749	67.5033	68.7725	66.6216	66.0389	64.4637	65.9662	66.0441	68.3926	69.1383	69.1136	67.9956
	17.1067	17.7027	18.7367	16.5376	16.7895	16.5065	15.6132	17.4567	17.6394	17.7108	16.1583	16.008	16.4326	16.481	18.066	17.1839	15.8435	15.6529	15.8308	16.0177	16.4616	16.6956	15.6794	15.0206	14.7629	44.2497	74.6101	104.708	129.244	141.893	155.086	160.92	154.596	145.502	138.272	136.015	131.178	125.852	123.144	120.798	116.54	111.382	107.572	106.558	105.722	105.663	105.294	104.147	100.095
	38.7793	39.2804	40.9898	38.2874	38.6769	37.4499	37.4729	39.3369	39.3121	39.792	37.2585	37.9513	37.5465	37.2789	38.6656	37.5526	36.6272	36.518	36.4651	37.0336	37.7536	38.0264	36.7581	36.2832	35.9009	45.6571	47.8381	50.9648	53.5986	57.4119	58.632	63.985	62.8558	63.066	60.5885	61.9531	61.827	61.5806	62.7535	62.6578	60.8776	60.9908	60.045	58.5905	59.1032	59.0612	59.3882	58.6458	57.6432
	24.8835	26.1232	27.2709	24.8845	25.7243	24.721	24.2078	26.018	26.3821	26.37	24.8895	24.9004	24.9383	25.205	26.1798	25.7957	24.2332	24.0476	24.4391	24.6936	25.6722	25.5774	24.5806	24.0054	23.3422	35.1774	40.0228	45.9241	50.4256	54.3432	55.4831	61.3061	59.9012	60.2376	62.0879	62.5415	61.2831	61.1331	62.1049	62.0118	62.7545	62.2479	60.7676	59.624	59.0199	58.742	57.2366	56.8026	54.9541
	21.7087	23.2011	24.1143	21.0808	21.9669	21.2528	21.1809	22.5204	22.5299	22.6408	21.1293	21.6174	21.4757	21.5242	22.1708	21.6704	20.8464	20.9107	21.3021	21.7386	22.1214	21.762	20.9969	19.9573	20.1213	83.4904	107.534	119.276	133.964	135.64	128.788	130.977	121.534	118.111	114.992	111.29	110.109	108.797	101.164	100.884	99.0738	100.662	104.132	100.756	100.557	100.949	91.9245	87.7602	82.816
	29.9515	31.3728	32.1123	30.0815	30.9282	29.824	30.1689	32.2771	32.4148	32.0132	30.868	30.9141	31.2377	31.6078	32.5587	32.0158	30.1395	30.4887	30.14	30.3575	31.46	32.2178	30.3695	29.5706	29.9207	48.4754	63.9871	72.1495	82.5445	94.9239	96.7142	103.528	105.984	109.786	101.765	106.893	100.025	99.4808	98.9293	98.9198	97.6929	99.5996	98.4664	95.4804	92.3473	94.5436	92.5313	90.0408	86.4894
IKO null	35.3717	34.7282	36.2494	35.1264	34.4575	35.0425	36.2359	36.2268	35.7895	34.7376	33.9416	35.6886	35.7503	34.597	34.2744	35.7821	35.0583	35.1402	33.9779	33.4028	34.6587	35.0266	35.0164	33.0912	33.2338	33.5825	33.7291	35.2237	36.7369	36.9008	36.5482	36.3892	37.9715	39.5885	38.6786	39.673	40.0673	39.1457	39.5174	39.6674	41.2825	42.1101	41.1684	40.0802	39.982	41.1764	42.1967	41.18	41.0829
	31.8379	31.5664	32.8694	31.374	31.3329	31.3586	33.2853	33.242	32.4331	31.5743	30.8889	32.8393	32.7308	31.9381	31.1287	32.4458	31.5747	31.4034	30.279	29.9172	30.4298	30.5307	30.3501	28.9046	28.6228	28.2959	28.1241	29.0879	30.3491	30.0111	29.966	29.9466	32.3679	33.5598	34.0282	35.1654	35.3645	35.5361	35.3418	34.4207	36.3128	37.6444	36.7324	35.3769	35.5793	36.1014	36.434	35.9746	35.2541
	25.4704	24.9567	26.3009	25.4197	24.9966	25.5771	26.9154	26.2085	26.0005	24.8655	23.8093	26.0064	25.7112	24.9233	24.4805	25.8651	25.5433	25.2049	24.3089	23.6417	24.512	24.6636	24.8242	23.4029	23.1874	23.2072	23.2356	24.1185	25.5983	25.0164	25.4503	25.2269	28.1566	29.9093	29.7305	31.1467	32.7667	32.0993	31.4464	30.9669	32.6923	33.3236	32.2107	31.6969	31.0645	31.6717	32.6915	31.5897	31.0186
	33.4397	33.0528	34.271	33.0367	32.6882	32.9781	34.5448	34.3752	33.9866	32.9206	32.3223	34.0236	34.054	32.6625	32.2002	34.3881	33.0285	32.9091	31.7375	32.0437	32.805	32.9645	32.6273	31.0457	31.1904	31.637	30.9225	32.4679	34.4199	33.6807	34.0556	34.7377	37.2704	40.2261	41.5106	44.8428	44.8929	44.3057	43.3848	42.9008	45.0459	45.1746	43.0663	42.2473	42.1218	42.2821	42.7381	42.4815	41.0584
	30.2574	29.6674	30.8557	29.4551	29.2372	29.2603	30.2446	30.3609	29.6136	28.6738	27.6513	29.2926	29.2069	28.1434	27.5737	28.8557	28.0695	28.271	27.2763	26.5601	27.5807	27.8607	27.848	26.016	26.1743	26.0152	25.6715	26.5462	28.3109	28.042	28.5513	29.1369	31.0126	32.8264	32.9585	34.7347	35.8131	36.0416	36.0269	35.2386	37.7464	38.1303	36.9216	36.453	35.9176	35.8401	36.1643	36.0547	35.4038
	36.9279	36.4963	37.9044	36.7285	36.5433	36.6499	37.865	37.7533	37.0473	36.3385	35.6162	37.2833	37.0865	36.6135	35.3645	37.138	36.6629	36.4226	35.3337	35.1278	36.0158	36.1954	36.3955	34.9907	35.0566	34.7689	34.472	35.919	37.3241	38.2754	38.3032	39.3888	43.3557	43.5556	43.8322	45.0076	44.9551	47.969	49.0415	48.5138	49.9085	49.9337	50.2161	49.5975	48.616	52.9586	51.7142	52.3312	53.9282
	38.4528	37.5771	38.1638	37.1187	36.6085	36.6806	37.7684	37.4484	36.8401	35.7111	35.1091	36.3084	36.4107	35.4352	35.0273	36.5456	35.7526	35.3863	34.2401	33.712	34.8183	35.0913	35.0512	33.599	33.4975	32.7908	32.3168	33.5689	34.5231	34.0361	34.0377	34.4183	35.8999	36.9018	35.8915	36.4953	36.5958	35.8726	35.7408	35.6371	37.5668	38.0136	37.4234	36.7309	36.5557	38.0958	38.7736	38.4168	38.2051
	30.4272	30.0185	30.6321	29.3364	28.8536	29.3062	30.6274	30.3996	29.8722	28.9074	27.8436	29.6317	28.9348	28.3897	27.3491	29.7646	28.6901	28.4712	27.3413	26.9092	28.0861	27.9989	28.4523	26.4068	25.5438	26.2966	25.1756	26.5518	27.6341	27.3248	27.3976	27.1402	28.5098	29.6246	29.3208	29.5986	30.067	29.3028	29.3784	29.3531	30.608	31.4492	30.3574	29.9589	29.3634	30.2087	31.575	31.7939	30.4714
	24.1939	23.7567	24.774	23.5329	23.4268	23.5799	24.83	24.725	24.407	23.0594	21.8131	23.8452	23.6803	22.9344	22.4555	24.2349	23.4106	22.9188	22.0659	21.7128	22.7318	23.2017	22.7898	21.3395	21.3374	21.6316	21.9988	23.5761	25.6473	25.8155	27.5248	28.2581	30.8108	34.6808	34.5444	37.7366	38.8373	38.5372	38.4005	39.7503	42.1078	41.644	40.5883	39.3001	38.2573	38.7575	40.7873	39.6739	38.0482
	53.3821	51.5916	51.918	51.8835	50.1123	49.8835	49.1831	50.2179	48.8674	47.0892	48.6039	50.0073	47.5251	48.5949	46.9721	45.0405	46.1116	46.5001	44.9712	46.2675	47.0275	46.7113	44.6211	45.3068	47.7001	47.7913	50.7528	50.4833	49.6821	51.1069	49.9388	49.2164	52.1596	52.9499	52.4604	52.0731	53.4023	54.9303	54.6846	55.8524	56.3404	56.1626	56.9525	57.1399	57.9679	56.7685	59.1155	60.1008	59.8625
	70.209	67.9856	68.4711	68.9794	66.9032	66.033	66.8221	66.6633	65.1966	62.1295	65.3543	65.7554	62.639	64.5635	63.1088	60.6064	61.4863	62.0715	60.3671	61.8541	63.0701	61.7946	59.8041	60.6451	62.8582	62.1485	65.2054	65.2666	65.1091	66.9895	65.6101	64.2166	67.159	68.9606	67.6108	68.1978	70.2312	71.2355	71.2508	72.1737	72.1464	72.7537	73.4988	73.5293	74.2491	74.0392	76.3782	77.1206	76.0975
	57.1411	55.5144	56.1113	56.9591	54.9859	54.1666	54.6155	55.282	54.5945	50.8586	54.3274	54.3894	51.6438	53.5424	52.5921	50.2487	51.5004	51.7131	49.9607	51.1297	52.4208	51.0241	49.5362	49.7766	51.7978	52.7706	55.7521	55.1893	55.247	56.6913	55.8595	55.3494	57.5143	58.958	57.6662	57.9826	59.1654	60.6604	60.9276	61.0475	61.3052	61.0681	62.841	62.6341	63.4027	62.6582	64.4178	65.6379	65.2893
	14.7274	13.8264	13.8985	14.1927	13.4685	12.2276	12.3381	13.1115	12.4532	10.1387	11.8123	13.4367	11.2936	11.5508	10.0323	8.32093	9.48354	9.65263	7.803	8.71017	9.70321	8.26957	6.60046	6.6749	8.5996	7.34181	9.30042	9.43489	8.67114	9.63055	8.26036	8.32015	10.2289	10.7518	10.5629	9.59989	10.8535	11.833	11.93	11.7869	12.1701	12.0888	12.8405	13.0338	13.5753	12.3082	14.0856	15.3999	15.2839
	44.1103	42.5816	42.6786	42.9757	41.5314	40.2453	40.8894	40.7796	40.3407	37.0934	39.866	39.2346	38.033	38.6744	37.6445	36.0294	36.551	37.2476	34.9616	36.2276	38.1794	36.7093	35.7676	36.0178	38.3008	37.2439	40.7533	40.1642	40.636	42.2958	41.7077	40.6711	44.126	45.3079	44.82	44.9415	46.97	47.7718	48.0176	48.497	48.1383	48.338	49.7854	49.7097	50.1855	49.5089	51.1367	52.2471	51.5651
	16.571	15.4155	15.1717	16.0317	15.0212	13.9505	14.573	14.3559	14.2888	11.8289	14.1966	14.7007	12.2483	13.4132	11.6407	10.6392	12.0058	12.2718	10.7494	11.5813	13.0458	11.694	10.7505	11.0996	12.8641	12.5815	15.3278	15.0915	14.3782	16.4988	14.8886	14.8743	16.6954	17.8823	17.8477	16.5239	18.3944	19.9717	19.2002	20.1351	20.0049	19.8753	21.0474	21.0423	21.3218	20.7805	22.5166	23.5442	22.3753
	24.9736	24.1524	24.5598	24.8728	23.9875	22.2284	22.8671	23.0148	22.5964	20.468	21.9092	22.9158	20.6437	21.2058	20.8105	18.9337	19.8492	20.6454	18.4489	19.7611	21.1651	20.0966	18.7584	19.0975	20.7276	21.1864	22.7076	23.3406	22.6155	24.238	22.9929	22.0117	24.3516	25.5125	24.8036	24.4985	26.1787	27.0889	26.7968	27.1607	27.5703	27.6666	28.4834	27.7788	29.0374	28.4434	29.821	30.492	30.3261
	21.3114	20.5349	21.0199	21.8544	20.1641	19.8565	19.7069	20.8605	20.0394	17.994	19.5491	20.4873	18.7231	19.8183	18.1156	16.1015	17.5281	17.588	16.2019	16.4496	18.3435	16.7656	16.3708	16.4997	18.2955	17.7258	20.2673	20.052	19.7739	21.3117	19.7753	19.213	22.099	23.2619	21.9361	22.3577	23.1182	23.8698	23.9478	24.0713	24.6514	25.1016	25.3499	25.1898	25.4098	25.1656	26.7215	27.0598	26.4495
	39.6301	37.7653	37.957	38.0395	35.8351	35.2086	35.7233	35.826	35.0587	32.5492	34.8162	34.4279	32.941	33.7278	32.4952	30.6373	31.7288	32.1582	30.1801	31.5392	32.9931	31.7768	30.046	30.675	32.5362	32.0094	34.7774	34.4164	34.1693	35.9918	34.7153	33.9245	35.6253	36.8674	36.3384	36.314	37.5063	40.0354	41.2453	42.6954	43.1901	42.9568	43.9979	44.956	45.2637	44.5968	45.6381	46.0808	44.8598
	19.5747	17.9294	18.2352	18.6355	17.9621	17.1918	17.3093	17.8545	16.9981	14.863	16.852	18.1038	15.6666	17.2174	15.919	13.862	15.3829	15.3076	14.0319	14.4264	15.7539	15.2748	14.096	14.7004	16.4398	17.348	19.6809	19.6106	19.7658	19.9533	20.0057	19.0703	21.4606	22.2679	21.8371	22.054	23.2668	24.5751	23.9417	24.8872	24.6195	24.8664	25.9871	25.8393	26.0707	25.7454	26.6002	28.1428	27.8628
	21.5376	20.3138	20.1038	21.1415	19.4442	19.0363	18.9495	19.5624	18.8033	16.7195	18.0696	18.5993	16.7456	18.1598	16.8092	15.531	17.0074	16.8671	15.0343	16.0344	17.2161	16.1827	14.849	15.4265	16.4368	17.0059	19.003	18.7705	18.5929	20.0982	19.1184	18.368	19.9031	21.2864	20.3717	20.3351	21.8033	22.6426	23.0078	23.8404	23.8349	23.8128	24.7281	24.4358	24.3658	23.7108	24.8834	25.6887	25.2833
	47.5751	46.423	46.9224	48.0616	45.5487	45.4657	46.0826	46.4567	46.1445	43.1025	44.9502	45.9882	44.7131	45.0684	43.7026	42.2728	43.0816	42.7003	41.1929	42.828	43.4889	42.3367	41.0949	42.3251	44.619	44.7289	46.5128	46.3588	45.6239	48.1852	46.4805	45.9666	48.4194	49.3661	48.1687	47.789	49.4925	51.2308	50.0767	51.3936	51.1174	51.0775	52.386	52.5362	52.7586	51.8663	53.4146	55.2597	53.7796
	8.19022	7.37568	7.30158	7.99057	6.60029	6.38752	6.17972	7.08355	6.18831	3.83811	5.77544	7.11975	4.68286	5.50724	4.33826	2.5413	4.07086	4.1429	2.63933	3.87073	4.80184	4.2599	2.56034	3.20965	4.57632	4.44468	6.66829	6.37313	6.86037	7.37604	6.42818	5.92979	7.93384	9.1884	8.40891	7.90885	8.92983	10.0636	9.49649	9.57238	10.2866	9.87605	11.0279	11.3457	11.5826	10.5239	12.3745	12.8022	12.1848
[truncated: 52 more columns]

## Sheet: Panel I
IKO NULL	29.7138	29.5809	30.3581	28.5815	27.7075	26.7601	28.0621	29.1164	28.5375	28.1512	26.9032	27.8925	27.5733	28.7023	29.55	29.104	28.2817	28.101	28.3886	27.7619	27.9637	27.1603	27.4652	27.142	28.0525	26.8918	28.3638	30.4056	29.3932	28.8409	29.1378	30.4057	31.5682	32.1947	31.3205	31.4932	32.1811	32.9898	34.2487	36.3906	37.7388	37.8671	39.035	38.2405	40.9876	41.5271	41.8497	40.9316	43.9009
	21.0326	20.5348	21.5042	19.4951	18.3099	17.5713	18.6647	19.7303	18.3346	17.7666	16.5555	17.5372	17.5026	18.4819	18.8408	18.2593	18.1602	16.8748	16.8936	16.7858	16.2739	15.7176	15.8601	15.7073	16.4516	13.6913	14.9532	17.0466	16.4386	15.8166	15.6421	17.2955	17.6169	18.8895	17.3805	17.2306	18.5967	19.7189	20.9584	23.4802	24.8268	25.0356	26.2743	25.6816	28.3955	29.0903	29.935	28.8376	31.6538
	15.9402	15.5714	16.1117	14.6777	13.5825	12.4304	14.0139	14.0797	14.0549	13.44	13.049	13.0374	13.4127	14.5034	14.5099	14.8336	14.1421	13.6218	13.4703	13.4842	13.9071	12.4838	11.5691	12.1292	12.3188	10.9356	11.9263	13.0477	13.3227	12.1	12.245	13.159	14.1739	14.5586	13.382	13.6461	14.4759	15.9178	17.2999	18.5063	19.476	19.0634	20.0059	19.0393	22.1978	22.4886	23.3282	22.3809	24.303
	13.4016	13.473	15.0854	12.2132	11.2671	10.3289	11.4809	11.1901	11.1216	9.50602	9.0309	9.60473	9.85715	10.9803	11.4196	11.534	10.0412	10.1944	10.1639	9.87675	10.1778	9.18434	8.37139	8.74511	9.30049	8.10413	9.85271	10.9979	10.7906	10.8664	10.3283	11.1338	11.6517	12.3707	10.5743	10.3426	11.5065	12.8381	14.2387	15.4613	16.2724	16.3122	16.4757	16.2204	18.444	18.9445	19.115	17.8563	21.0844
	20.9555	20.5025	20.8573	18.7812	18.3738	16.8297	17.9212	18.2454	17.5529	16.9797	16.0137	16.1628	16.0011	17.2324	17.6776	16.9149	16.1878	15.0263	15.9674	15.4393	16.0998	14.4851	13.9286	14.4931	14.5874	13.3613	14.2425	15.4893	15.4232	14.7948	14.3342	16.13	17.1435	17.9649	16.639	17.0191	18.1764	19.5014	20.9507	23.2552	24.464	25.5769	26.3283	26.0965	29.1485	30.0309	30.6462	29.4744	32.9157
	0.676785	0.840181	1.94369	0.798075	0.0281146	0.0628093	1.11555	1.51627	0.130559	-0.348447	-1.41685	-0.775705	-0.579218	0.778327	1.25593	0.415436	-0.252063	-1.29009	-0.963743	0.0354191	-0.157406	-1.38077	-1.71713	-0.721257	-1.5782	-1.41218	0.372214	1.46334	1.6329	1.36119	1.62096	2.82074	3.83193	4.68303	3.20155	3.71997	4.36037	5.70782	7.49165	9.59474	10.5861	11.6155	12.3806	12.7612	15.4235	16.1098	16.08	16.2135	18.7737
	17.982	17.7525	18.8477	17.0619	16.1192	15.5513	16.7916	17.7366	16.6865	16.0028	15.463	16.1203	16.139	17.1379	18.1599	17.9546	16.9759	16.417	16.619	16.6773	17.058	16.0469	15.9351	15.5354	16.716	15.7766	17.0653	18.0441	18.1892	17.2333	17.4527	18.5065	19.6107	20.3888	19.4452	19.6035	20.436	21.4822	22.8204	24.844	25.3061	26.2006	26.4868	26.486	28.6952	29.3183	29.7943	29.5263	32.5133
	12.906	12.6109	13.5944	12.3059	11.0461	10.4559	12.2012	11.9709	11.4381	10.2641	9.94916	10.2488	10.2854	11.8072	12.5239	12.2188	11.2099	10.2038	11.3047	11.2366	10.6953	10.2392	9.89481	9.2041	10.1089	8.492	10.254	10.7134	11.1299	10.464	10.0814	11.7391	12.0747	12.7287	11.492	12.3102	12.3243	13.663	14.5481	16.7773	17.4853	17.707	18.3992	17.5735	20.5821	20.7244	21.325	20.0565	22.6069
	8.88774	8.89373	9.76672	7.93719	7.07768	6.39479	7.59776	8.04872	6.90624	6.46361	5.61215	5.67632	5.81596	7.43041	7.63751	6.93008	6.76246	5.45372	6.01707	6.27134	6.32238	4.89697	4.24068	5.02391	5.23516	3.7631	4.73747	5.60637	5.62069	4.50687	4.84723	5.61252	6.3422	6.91109	6.30109	6.12854	7.03665	7.78704	8.60146	10.6095	10.6905	11.4336	12.2203	10.5872	13.1252	13.507	13.3772	12.2572	15.065
	23.6611	23.6892	24.2764	22.4741	21.8113	20.8506	21.8166	22.5335	22.1064	20.8149	19.5099	20.8569	20.9792	22.3524	22.7149	22.8291	21.9225	21.8566	22.4225	22.9732	22.3193	21.7055	21.9778	21.3409	21.6514	20.3163	21.354	22.5868	23.1777	22.3576	23.0027	24.3298	24.8368	25.053	24.0657	23.5521	24.0609	25.0587	25.6773	27.5874	28.1072	28.4783	28.906	28.2636	30.5483	30.67	30.7957	30.333	32.9758
	5.69224	5.07203	6.06207	5.08533	3.92097	2.91597	4.08552	4.91125	5.21711	6.36528	6.66724	8.24048	8.35021	11.5975	12.6256	13.1608	12.7369	12.4457	13.7015	14.2272	15.4872	14.1423	14.1827	15.4402	16.8968	18.8592	19.7094	21.5716	21.3833	20.7648	21.5472	21.8104	23.123	23.4563	22.136	22.5355	23.0925	24.322	25.1195	26.2134	27.4756	27.2132	28.1945	26.6732	28.8309	28.559	27.7078	28.1174	29.2951
	42.1101	42.3874	43.7732	41.9021	40.1117	39.1237	40.4765	40.924	39.8202	38.5603	38.3655	39.4157	39.4066	40.5961	41.3025	40.353	39.2509	37.6783	38.6665	38.1478	38.7083	37.2546	36.7113	36.7775	37.8939	35.4318	36.6404	38.3145	38.1878	36.9524	37.7287	38.935	40.1269	40.5256	39.2961	39.1149	39.9906	41.6492	43.09	44.8536	45.5699	45.4579	46.8252	45.7036	48.7213	48.8792	48.2569	47.2804	50.4714
	16.2206	16.0359	16.9268	14.6338	14.3335	13.4709	15.0078	14.1477	14.0408	13.1908	12.2458	12.8723	13.3378	14.1025	14.9312	14.5862	13.518	12.5741	13.7747	13.637	14.1133	12.9537	12.8986	12.5348	13.1122	11.2901	12.0214	13.165	13.1851	11.9566	12.3831	13.8868	14.2101	15.054	14.3293	13.8621	14.3288	15.2052	16.8597	19.3941	21.0406	21.3496	22.6302	22.0473	24.7056	26.7992	26.4185	26.0334	28.3397
	25.3909	24.8277	25.2845	23.9381	22.7018	21.9178	23.4106	23.0505	23.0622	21.9767	21.5447	22.2927	22.2935	23.0859	23.7293	23.4007	21.8515	21.2838	22.1107	21.7989	21.8093	20.9919	20.0237	20.2702	21.3499	18.6237	19.7854	20.7569	21.2095	19.8732	19.8392	21.2282	22.0643	22.7494	21.517	21.3486	21.8999	22.9591	23.5172	24.9435	25.6542	26.2527	26.8222	25.6807	28.0149	27.2158	27.6162	26.2025	28.6685
	30.9671	30.6237	31.5763	29.6666	28.9379	28.0355	29.3298	29.6526	28.6255	27.9585	26.3118	26.7633	27.7842	28.3461	29.0906	29.1362	27.3046	27.0574	27.8516	27.5266	27.65	27.2547	26.4747	26.3985	27.5387	25.038	26.3949	27.1417	27.49	26.3533	26.2266	27.5369	29.8886	30.6474	29.0318	28.976	29.7771	31.2546	33.1349	35.0496	35.87	36.2662	37.0712	36.9554	40.1115	40.4738	41.0658	40.3875	43.6558
	10.2067	9.19356	9.97887	8.13244	7.35618	7.17294	8.41352	8.97461	8.18738	7.36532	6.30623	7.28631	7.19483	9.61426	10.2154	9.45846	9.15547	8.53307	9.20397	8.81385	9.54568	8.66385	8.08283	8.39457	9.17452	6.90625	8.43755	9.57139	10.2197	9.19655	9.02849	10.7438	11.6354	11.934	11.0621	11.0199	11.8558	13.5448	14.6169	16.7522	17.7272	18.3263	19.2175	18.8513	22.0807	22.0116	22.6219	22.1978	24.5727
	16.7969	16.1062	16.7375	14.6012	13.3067	13.3481	14.6839	14.8037	13.7026	12.6453	11.6532	12.2273	12.1918	13.4599	14.3677	13.4904	13.0467	12.5891	13.7851	13.4329	14.0206	13.5046	12.7728	12.6622	13.435	11.6185	12.7593	13.1017	13.7053	12.405	13.3085	13.2048	15.3893	15.423	14.9208	14.4982	15.2477	16.1942	17.551	20.0105	20.8999	21.4524	22.1512	21.4076	24.1755	24.486	24.3399	23.4577	25.3922
	14.6878	13.7874	14.8897	13.3398	12.533	11.4326	13.0934	13.3643	12.1502	11.63	10.4493	11.2389	10.7434	11.7205	11.8034	12.8479	11.3203	11.191	12.096	11.7767	11.5756	11.0086	10.171	10.1863	11.3594	10.8142	10.8593	11.6118	10.2829	10.8313	10.2048	12.8537	13.2387	13.613	11.5928	12.6257	12.5873	14.9108	15.9136	17.2091	17.7424	16.6682	18.7928	18.1585	20.1864	21.2197	21.3664	20.5982	23.3351
	27.2099	26.5055	27.6062	24.6159	24.7406	23.3689	24.3906	25.9277	24.2857	23.2479	22.6745	22.8772	22.7838	23.1675	23.7649	22.9654	21.9138	22.0397	21.9754	22.0361	22.1631	20.618	20.0593	19.6106	20.3273	14.5584	17.6437	18.097	18.0816	17.175	17.6915	19.362	20.161	20.923	19.3508	19.0976	20.287	22.0548	23.3118	25.3805	26.0728	27.5557	28.423	27.8119	30.252	31.0164	31.2273	30.2554	32.8269
	16.5679	16.196	17.631	15.655	14.8557	14.4953	16.0468	15.8847	15.1517	14.404	13.6058	13.9952	13.4644	14.8759	15.4501	15.6883	14.3584	13.9636	14.3788	14.1213	14.5413	13.1879	12.8757	13.072	14.0455	12.7345	13.6479	14.811	14.8941	14.2783	14.5573	15.5645	16.8015	17.7272	16.1535	16.8181	17.1871	18.8412	20.9811	22.6123	23.7917	24.5328	25.4152	25.1121	27.7686	28.986	29.4159	28.2312	32.1681
	4.30563	3.90037	4.57354	3.37349	2.63761	2.30598	3.32808	3.80022	3.88122	2.53447	1.61546	1.71779	0.857034	1.61435	2.16316	1.71677	0.211275	-0.509359	0.117544	-0.517622	-1.07214	-1.89137	-2.76004	-2.76568	-2.33222	-5.05687	-4.68439	-3.52799	-3.40261	-3.97257	-4.2451	-3.17516	-2.09343	-1.91818	-3.43499	-3.48739	-3.53335	-1.84128	-0.727991	0.353147	0.334605	0.484921	0.800081	-0.098736	2.06815	2.52886	2.21717	1.09111	2.65681
	26.952	26.3926	27.7874	25.1759	24.4669	24.1089	25.2439	25.4633	24.6384	23.8485	23.3179	23.9213	23.2638	24.8182	25.3203	25.8553	23.6034	23.1096	23.9204	23.8888	23.7996	22.0481	22.1501	21.7375	22.389	20.2475	21.1881	22.189	21.9199	21.1182	20.9348	21.7794	22.8327	24.123	22.391	21.8657	22.2574	23.9607	24.9272	26.1571	27.1162	27.7751	28.469	27.8056	30.3273	30.6637	30.661	29.8248	31.9445
	27.5656	27.3694	27.5287	25.6557	25.1032	23.8248	25.3494	25.3872	24.8359	24.7034	23.5095	24.0295	23.9961	24.7534	25.5155	25.5106	24.2152	23.4324	25.0116	24.6398	24.4244	23.6567	23.3879	23.6603	24.8503	23.7431	25.4115	26.3582	26.95	25.9205	25.877	27.1778	28.259	28.7201	27.156	27.3368	28.6097	29.7162	30.6951	31.9385	32.7009	32.1368	33.1345	32.5859	34.6337	34.0821	34.5565	33.7932	36.4444
	31.6965	30.5111	31.5188	29.5114	28.4555	27.5599	29.6545	29.987	28.5923	27.597	26.9083	27.3756	27.6338	28.6297	29.4567	29.316	28.3041	28.0922	28.9422	28.5923	28.5939	27.7629	26.9101	26.5339	27.5596	26.2989	26.9955	28.3116	28.71	27.8293	27.2705	28.607	30.1032	29.6714	28.2543	28.2393	29.1636	30.4226	31.7436	33.0572	33.762	33.1028	34.4112	33.29	35.5462	35.9935	35.5418	34.8188	37.4797
	6.57744	6.2671	7.50272	4.95531	5.13138	4.2217	4.93949	5.09847	5.29362	3.83239	3.70039	3.7641	4.1795	5.08779	6.04311	5.8728	4.45491	4.41065	4.17713	4.37501	3.78759	3.74592	2.78385	3.32589	3.62012	2.56896	3.4118	4.79554	4.588	3.93683	4.28723	4.20428	5.51435	4.82658	3.47461	4.46003	5.75439	6.81072	7.60967	9.51648	9.36878	9.56282	10.2949	9.98731	11.0537	11.6966	11.4594	10.233	13.7312
	19.3639	18.6712	19.3275	17.3484	16.5758	16.5821	17.4342	17.862	17.5416	16.1797	15.3118	15.737	15.9692	16.8789	17.5553	17.1637	15.9785	16.0562	16.3672	15.9958	16.0729	14.9556	14.7896	14.8098	15.6504	14.5434	14.911	16.1846	15.7579	14.8584	14.7182	15.1919	15.9939	16.1597	15.7969	16.4718	18.5434	20.2749	22.1197	24.2903	26.1774	27.0542	27.6761	27.6524	30.3928	31.0478	31.0423	30.6548	32.7229
	13.2895	12.5478	13.5784	11.5569	10.7782	10.0476	11.2692	11.6727	11.0662	10.622	9.7086	10.3567	10.1612	11.7263	12.7775	12.5374	10.8567	10.7324	11.4862	11.1739	11.2252	10.2775	9.12248	9.4919	10.4619	7.48908	8.47298	9.03739	9.46677	8.77973	8.83078	9.33354	9.89974	10.8858	9.17887	9.16632	10.2888	11.4928	12.3583	13.7237	14.6438	15.8794	16.2252	15.6372	17.9556	18.2405	18.5761	17.7768	19.7947
	22.1027	21.4857	21.9502	20.4549	18.8919	18.5761	19.2614	20.2473	19.0249	18.5627	17.2757	17.3297	17.9957	18.5569	18.8232	18.7805	17.7203	17.5365	17.7091	16.8821	18.2391	17.3415	16.881	16.445	17.8444	16.9342	17.554	19.502	19.2148	17.8517	18.3749	18.7147	19.4858	19.9516	18.7261	18.8906	19.7727	20.7331	21.4622	23.7318	24.7991	25.4438	26.2625	25.6916	28.7865	28.5753	28.7426	28.0128	30.8622
	20.5671	19.9473	20.8701	18.3043	17.8787	17.2951	18.4306	18.7081	17.6637	16.6638	15.7382	16.637	16.2562	17.3967	18.4257	18.4834	16.1159	16.1365	16.9743	15.7979	16.1952	14.5867	14.2164	14.4961	15.4934	13.906	15.1855	16.2556	15.8266	15.1722	14.326	15.6414	16.3971	16.7077	14.892	14.7919	15.7172	16.4697	17.269	18.5754	20.0391	19.8783	20.3825	20.0094	21.7363	21.9931	21.6694	20.5094	22.4873
	6.77478	6.78272	7.35869	5.97691	5.23932	4.26942	5.74345	6.0158	4.84575	4.42287	3.72804	4.50358	4.26715	5.31377	6.21033	6.03774	5.10457	4.33392	4.76352	4.55437	4.71562	3.52777	3.20548	3.5886	4.24403	2.49891	3.92087	4.79284	4.62893	3.98907	3.70119	4.86151	5.74632	6.55785	5.19988	5.10799	6.24093	7.1679	8.20063	9.99845	10.5463	11.3115	11.2382	11.2061	13.7253	14.0743	13.9285	13.7625	16.1615
	19.2356	18.5742	18.7818	17.1705	16.5867	15.6945	16.6342	17.0242	16.4916	15.1086	13.9587	14.6821	15.261	15.9463	16.2217	15.8873	14.4085	14.2376	14.5681	14.529	14.8789	13.9014	13.0543	13.2041	14.0163	11.8006	12.9196	13.7682	14.2001	13.6746	14.1083	14.6599	15.8969	17.0522	15.9183	16.1482	16.4974	18.0307	18.8134	21.1347	22.2057	22.6213	23.1341	22.8811	25.5984	26.0021	26.1556	25.9061	28.4413
	18.7424	18.2334	19.0127	16.7806	16.1301	15.4454	17.3686	17.9191	16.909	16.3077	15.5486	16.3399	16.2266	17.6677	17.7727	17.6745	16.2699	16.1749	16.9765	16.7033	16.6486	15.7459	15.5175	15.4798	16.4887	14.8841	16.1009	16.9993	17.4808	16.138	16.2648	17.2734	18.448	19.3208	17.6914	17.5889	18.8264	19.562	20.9414	22.9187	23.6156	23.9542	24.0787	23.8945	26.5188	27.0411	27.3405	26.6188	28.8614
	38.8245	38.2055	37.8671	35.3083	34.3242	32.2035	33.9274	33.9417	32.6553	30.923	30.3373	30.3189	30.2396	30.676	31.4434	30.9014	29.1214	28.3038	28.7615	28.1063	27.7109	27.1597	26.1406	26.2073	26.8295	23.2533	24.6547	25.549	25.3913	24.9828	25.009	26.3118	27.4195	28.0398	26.8	26.859	27.3488	28.6177	30.3834	32.2729	33.0416	33.4696	34.2906	34.0815	36.1574	36.3815	36.4998	36.2428	38.468
	20.7954	20.2537	20.8459	18.1523	17.4618	17.065	17.8914	18.3011	17.6042	16.6697	16.1213	16.1374	16.1783	17.6572	17.947	17.6699	16.6116	15.7089	16.0814	16.2042	16.3407	15.4682	14.9836	14.5253	15.5086	13.7339	14.7742	15.7661	15.7809	14.7435	14.7611	16.1067	16.9052	18.1802	16.549	16.4178	17.075	17.5473	18.8851	20.654	21.6771	21.8055	22.6873	22.0541	24.8878	25.5922	25.8967	25.3941	28.2407
	14.2128	14.1751	14.6946	12.8581	11.8115	11.1162	11.9688	12.7394	11.5409	10.4611	9.88909	10.1887	9.79883	11.4655	11.3911	11.9584	9.96043	9.30448	9.66647	9.34955	8.83511	7.68024	7.69196	7.4804	8.62239	6.94283	7.784	9.09714	8.94739	8.64856	8.14837	9.29443	10.4473	11.0672	9.53952	9.2332	10.3967	11.9335	14.2086	15.6554	17.324	17.9577	18.8498	18.8534	22.1402	22.9956	23.5874	24.1227	26.4499
	11.4699	11.642	12.5649	11.2567	10.5247	9.61154	11.2619	11.3102	10.7044	9.96901	8.87859	9.32302	9.71536	10.5734	11.415	11.4135	9.92724	9.09044	10.0391	9.50021	9.9576	8.96987	8.38598	8.83388	9.78728	10.0544	11.2293	12.1083	12.1793	12.0264	12.7575	13.2478	14.8732	16.0811	14.504	14.2525	15.3186	16.6771	17.9036	20.2104	21.4682	21.7025	22.6639	22.6241	25.2777	25.8872	26.4025	26.3045	29.0055
	20.4007	20.2481	20.8726	18.7168	18.5233	17.3711	18.8566	18.8142	17.1957	16.6731	16.512	16.4355	15.9112	17.0869	18.0163	17.9286	16.6166	16.5652	16.8955	16.4951	16.3897	16.0534	15.7881	15.3859	16.5425	15.2955	16.474	17.4186	17.9131	17.0047	17.5036	18.1772	19.7444	20.9357	19.2106	19.4176	20.7099	21.9283	23.0545	25.2489	26.5539	27.605	29.2574	28.5851	30.7888	31.3801	31.4744	30.8415	34.0731
	17.6879	16.9787	18.1161	16.3602	15.7468	15.0916	16.6068	17.3515	16.696	15.9885	15.1218	15.5272	15.4938	16.564	16.9574	16.4786	14.793	14.7691	15.553	15.386	15.2198	14.1479	13.2323	13.0737	14.3667	12.2904	13.4297	14.451	14.7395	13.6944	13.626	14.7432	16.0856	16.3705	15.6187	15.814	16.8481	18.4993	19.8855	21.8433	23.0536	23.5543	24.3434	23.9758	26.4147	26.8719	26.9482	26.7191	29.5027
	36.6194	35.3318	35.8743	33.6781	32.7809	31.9329	32.6449	34.1133	32.847	32.1596	30.6778	31.8243	30.7794	31.751	32.0345	32.0053	30.6872	30.007	30.4547	30.6799	30.1169	29.4314	28.5663	28.39	29.3728	25.1636	29.41	30.9876	32.5965	30.7707	30.8411	32.8124	33.7142	34.1904	33.1849	32.442	33.3967	33.6154	35.1984	37.3161	38.8094	39.9747	40.3823	40.3015	43.272	42.6842	42.5457	40.3033	43.0927
	11.4015	10.5277	12.0925	9.64418	8.50632	7.97802	9.19545	10.0476	8.76854	6.94079	6.48501	7.09073	7.14842	7.99014	7.62458	7.47559	6.26099	6.60724	6.58546	6.10888	6.23144	5.67115	6.15126	5.62694	6.54389	7.1681	9.4618	10.8372	11.6109	10.8264	10.2304	12.2713	12.3228	13.5845	12.2252	12.1326	13.7494	15.258	16.4562	18.3049	19.6247	20.6287	21.5543	21.4404	24.6874	25.6791	26.3658	26.1196	28.2265
	28.5058	28.7833	28.2289	27.0632	28.0779	26.1393	26.6391	27.0841	27.317	27.8469	29.2229	27.3877	26.0591	26.3254	27.0463	27.123	27.716	26.2771	26.29	26.2266	25.7118	26.9498	27.096	26.6353	27.4121	26.6434	27.749	28.2659	29.1222	29.3136	31.8773	33.1797	34.5867	36.9209	36.7787	38.1602	39.5371	41.8658	44.2326	47.0314	49.2212	50.5185	51.2516	53.7161	57.2263	59.1526	61.1604	61.0129	65.5135
	40.3275	39.8114	40.5788	39.0823	40.2731	38.4376	38.6701	39.4097	40.4106	40.3989	41.2728	39.4711	39.2826	38.7761	39.2227	40.1408	40.0589	39.3562	39.3645	39.0169	38.464	39.661	40.1568	39.5336	40.0287	39.3814	40.2034	41.8705	42.0855	42.3854	45.2103	45.5796	47.3828	49.5878	49.9265	51.7101	52.7422	55.2285	57.1293	59.3614	61.54	63.725	64.3385	66.8602	70.0274	72.7335	75.0006	75.5313	79.8027
	29.4194	29.4432	28.3987	27.9887	29.0793	27.0731	27.4578	28.097	28.8479	29.1961	29.3704	28.7525	29.1143	28.8901	29.3676	29.9918	29.9141	29.1018	29.0952	28.4074	28.6863	29.4239	30.0205	28.8777	29.3034	28.806	28.9448	30.3543	30.0301	30.7334	32.9979	32.6416	34.2586	36.5046	36.4129	37.0321	38.5834	40.8272	42.0399	44.0837	45.1672	46.4853	47.0284	48.533	51.6498	52.9152	53.5637	54.1088	57.3615
	22.5177	22.428	22.4682	21.5659	22.7496	20.4384	21.0295	22.0631	22.1056	22.5425	23.4397	22.5543	21.8052	21.6818	21.7846	23.1831	22.8622	22.6568	22.2803	22.167	21.8911	22.7617	22.9561	22.7977	23.1338	22.2043	23.3956	25.0775	24.5833	24.7689	25.8694	27.0359	27.9565	30.5384	29.7135	30.6389	31.4805	34.0886	34.9742	37.0503	37.9643	39.1434	39.3986	41.6764	43.841	44.9356	46.0412	45.3483	49.3866
	29.1231	28.8498	28.6249	27.6075	28.8043	26.6635	27.3115	27.7465	27.8842	28.865	29.5279	28.5608	27.2675	27.7283	27.5718	28.2895	28.7795	27.8405	27.2318	26.8642	26.857	28.1403	27.8001	27.7875	28.163	28.0475	29.045	30.4285	30.2353	30.7208	32.9791	33.718	35.2833	38.2704	38.1916	39.347	41.1315	43.9468	45.595	48.3598	49.7717	51.2114	52.3585	54.3419	58.2403	59.9143	60.9375	61.1137	65.2606
	44.0728	43.2312	43.3049	42.3079	43.5494	41.8025	41.954	43.2362	44.1214	43.2595	43.836	43.364	42.1681	42.3702	42.272	43.3251	43.2419	42.0457	42.3508	41.552	42.5615	43.0789	43.4546	42.9256	43.7635	43.9294	44.7969	47.9589	48.2219	48.2749	51.9912	53.214	55.5375	58.8294	58.9499	60.0828	63.129	66.671	68.0368	71.5088	73.4464	74.3832	75.5031	77.3352	81.0514	83.7456	84.8316	84.1435	88.5269
	40.2776	40.6616	41.0328	40.0987	41.1668	39.3718	40.2943	41.1548	41.2518	41.908	42.6813	41.4936	40.0965	40.6712	40.3761	41.1702	41.5139	41.1031	40.4159	39.7877	40.3414	41.6796	41.7235	41.3358	41.6893	41.6815	42.5527	44.7444	45.8614	46.7754	49.4981	50.3586	52.7797	55.7017	55.8385	57.4729	59.9003	62.9182	63.7128	66.5447	68.228	70.4874	70.3674	72.5581	75.841	77.466	78.4407	77.9474	82.1551
	32.7564	32.8466	32.7531	31.8929	33.017	30.9188	31.4544	32.052	32.5187	32.7519	33.7743	32.6769	31.6593	31.4472	31.8046	32.7189	32.7473	32.4879	31.7499	31.5279	31.5942	32.4842	32.8291	32.5462	33.1913	31.6432	32.9309	34.6998	35.1374	35.8134	37.9358	39.0005	40.8804	43.3153	43.2517	44.0463	45.4792	48.1178	48.9437	50.6419	51.941	52.9259	52.6151	53.8913	56.783	58.1123	58.1066	57.6294	61.0612
	38.9586	38.4803	38.5817	38.8588	39.7962	38.2082	38.8846	39.3636	39.982	40.8233	41.262	39.9821	39.2459	38.6467	39.3558	39.7013	40.3345	39.8074	39.3782	38.722	38.6185	39.7412	39.9577	39.2969	39.8749	40.1199	41.639	43.8352	44.2389	45.1995	48.1814	48.9915	51.2108	54.4042	54.4554	55.5488	57.2668	60.6514	62.6595	64.3678	65.7231	67.0752	67.833	69.271	72.9613	74.5352	75.4421	75.2381	78.2941
	54.909	54.5373	54.4218	53.6085	55.8481	52.3939	52.8723	54.2123	54.7829	55.2024	55.9041	54.5004	53.8496	53.6401	54.3892	55.3604	55.4393	53.8899	53.5609	53.8912	53.6977	55.0842	55.6026	54.2657	55.362	55.5607	57.4536	60.4477	61.6595	62.3523	65.6099	66.991	70.0541	73.0687	73.1802	75.7856	77.6212	81.1911	82.7579	84.6889	87.2801	88.3739	88.6065	90.7755	94.9749	96.0482	98.4022	97.4109	102.942
	40.5023	39.9567	39.7696	39.1296	40.4786	38.2681	38.568	39.3132	39.3099	39.6652	40.5456	39.2053	38.6001	38.2423	38.633	39.1528	39.2018	38.6968	37.7606	37.6795	37.9334	38.9563	39.2791	38.9807	39.2273	40.4661	41.8623	43.9798	44.8279	45.8772	48.6379	49.9866	53.0094	56.3318	56.5624	58.0238	60.4104	63.3439	64.6731	66.8241	68.4901	70.0009	71.263	72.3852	75.9489	77.6753	78.8147	79.0422	82.6744
	35.4928	35.3151	35.7247	34.7536	36.2538	33.8498	34.071	35.2008	35.3137	35.5669	36.3381	35.0774	34.4519	33.7726	34.2789	35.2101	35.4483	34.3114	34.567	34.0405	34.2185	35.501	36.8957	37.1025	38.2693	36.0856	36.983	38.7262	39.4011	39.9319	42.4569	43.4509	45.5736	48.6222	48.6046	49.9163	51.6532	54.8323	56.6199	58.6536	60.523	61.9631	62.4984	64.5278	68.0509	70.1599	71.4682	71.5471	75.8658
	34.7312	34.8155	34.628	33.3395	34.3955	32.0382	33.0201	34.1244	34.0044	34.5524	35.069	34.329	33.1246	33.3531	33.2136	34.3077	34.0719	33.1774	33.2101	32.6688	32.9308	34.2596	34.2539	34.0839	34.6445	34.829	35.7105	37.6463	37.8293	38.3583	40.8311	41.4112	43.7374	46.2088	47.0971	47.463	49.2173	52.3562	54.2438	56.7939	59.054	60.35	60.6338	62.7337	66.6575	68.3979	69.9723	70.1331	75.2389
	33.0523	33.3563	32.8321	32.4868	33.1095	31.3088	31.9079	32.561	32.7216	33.5779	33.8955	33.3906	32.5151	32.0894	32.4142	33.3658	33.6316	32.9942	32.0875	32.0594	32.1328	33.3829	33.9282	33.2657	34.0531	33.1079	34.2157	35.6509	35.6943	36.3027	37.9192	38.688	40.7288	43.4519	42.8339	44.4518	45.5336	48.4548	49.9894	52.1749	54.4055	56.0128	56.4257	58.6855	62.1224	63.2193	64.9236	64.7755	69.1584
	37.9052	37.8577	37.1141	37.1999	37.8269	35.8938	36.4063	37.2657	37.0475	37.6843	39.0095	37.3932	36.576	36.3658	36.4017	37.3861	37.4872	37.0785	37.1275	36.4273	36.6215	37.1656	37.3978	37.0059	38.3001	37.2949	38.0617	40.1465	39.9768	40.3861	43.1166	43.1867	45.137	47.9042	48.0073	49.0137	50.6226	53.4914	54.5971	56.6913	58.8375	59.9592	60.7154	63.3768	66.1621	68.0701	69.6741	69.9858	74.1965
	35.6149	35.6339	35.5327	35.3576	36.4058	34.4642	34.4903	35.5446	35.8583	36.3399	37.2764	35.7044	35.1523	34.9312	34.6182	35.8359	35.646	35.3943	35.3279	34.4982	34.7362	35.6706	36.1342	35.9125	35.8948	35.1268	36.3479	38.3802	38.2248	38.5916	40.9866	41.4669	43.7872	45.9785	45.9304	47.4043	49.3462	51.2874	53.3379	54.9564	57.1239	58.7579	59.3937	61.1602	64.4388	67.04	68.2306	68.5668	72.7142
	40.3021	40.4372	40.5065	40.036	41.3065	38.9167	39.2815	40.182	40.5232	40.6529	41.6173	40.1738	39.1511	39.0327	39.4717	39.9248	39.8084	39.1918	39.0696	38.5377	38.5442	39.8576	39.9174	39.4445	40.1231	39.0455	39.9078	40.984	40.6907	40.6692	42.6855	43.1406	44.8141	47.0692	46.218	47.0492	48.0752	50.4283	52.1633	54.1024	55.0138	56.5185	57.6005	58.9598	62.3907	64.227	64.9972	66.2579	70.7016
	43.094	42.9645	42.6957	42.3018	43.4328	41.3486	41.9234	42.7744	43.0587	44.1285	45.1426	43.3126	42.6686	42.3358	42.8254	43.5937	43.3266	42.7022	42.0597	42.1365	41.489	43.3448	44.0874	43.1791	43.2416	42.0805	42.6006	43.9002	43.4683	43.9724	45.8785	46.1015	47.6918	49.9861	49.2964	50.2894	51.2154	53.8876	55.3167	57.566	59.3692	60.7134	61.3378	63.6204	67.7215	69.845	71.043	71.9864	76.81
	20.346	20.1347	19.9596	19.4445	20.0394	17.9631	18.3437	18.9607	19.3716	19.8514	20.2741	19.2852	18.4158	18.2611	18.5297	19.3973	19.5262	18.7353	18.5959	18.0177	18.1542	19.2782	19.2189	19.11	19.3339	19.9089	21.106	22.2387	22.0701	22.3708	24.5257	25.4547	26.5794	28.6586	28.8838	29.2468	30.547	32.7864	33.8458	35.8449	37.1634	38.16	38.108	40.0992	42.6506	44.5088	45.4955	45.522	48.9985
	29.1095	28.8493	28.761	28.1056	28.9794	26.6627	27.4483	27.971	28.4394	28.645	29.5075	27.9985	27.7042	27.513	27.4394	28.6833	28.2854	27.8737	27.4621	27.2256	27.028	28.1391	28.3177	27.801	28.6185	28.7414	29.7263	31.4366	31.3899	32.4376	34.9141	35.9487	37.9902	40.3209	41.1073	42.393	44.882	47.8867	49.8918	52.6017	54.946	56.2644	57.044	59.5808	63.452	65.666	67.013	67.0915	71.9835
	33.2129	33.3009	33.286	32.712	33.5773	31.5308	31.7735	32.6768	33.3541	33.9703	34.521	33.3805	32.4191	32.2528	32.4425	33.5985	33.6369	33.0613	32.4259	31.8654	32.2456	33.1717	33.2408	33.0767	33.3976	32.9884	34.5951	36.7962	37.0691	38.5059	40.7779	42.0918	44.0973	46.5905	46.5962	47.9472	49.2974	51.5265	53.081	54.7236	55.6837	56.8994	57.0613	58.4688	60.9628	62.9495	63.3584	62.5949	66.0639
	23.3887	23.3196	23.025	22.3997	23.1693	21.4767	21.8327	22.6742	23.108	23.3701	23.762	23.0673	22.1615	22.3279	21.8829	22.8875	22.9809	22.3918	21.8681	21.4243	21.4596	22.5662	22.7725	22.4591	23	22.3336	23.2273	24.3566	24.1895	24.518	26.5399	27.0843	28.3296	29.9321	29.7796	30.215	31.7183	33.6889	34.3834	36.1986	37.2853	38.3732	37.8782	39.4846	42.0422	43.3302	43.4281	43.4216	46.5657
	34.8323	35.0472	34.8381	33.9312	35.2614	33.0606	33.4461	34.4586	34.7775	35.5286	36.3289	34.8772	34.1956	33.8858	33.7357	34.5876	34.7518	34.4003	33.9154	33.48	34.1341	35.1167	35.0235	34.46	35.5077	35.3696	36.1107	37.9745	37.8227	38.1101	39.9641	41.0476	42.906	45.4574	45.5891	46.4901	48.1262	51.3557	52.3399	54.7972	55.991	58.0575	58.3174	60.1887	63.5244	65.4291	66.2942	65.6485	70.0188
	37.8718	37.8571	38.0327	37.0017	37.7248	36.1993	35.7451	36.7004	37.259	37.4834	38.198	37.1203	36.0123	36.1712	36.6954	37.262	37.5256	37.254	36.7551	36.8481	36.6863	37.7964	37.6713	37.2376	37.7802	36.6807	38.5486	40.4962	40.244	41.4269	43.7001	44.1846	46.5355	49.6559	49.0929	51.2061	52.8774	56.6835	57.8869	61.2073	63.1848	64.5053	65.1888	66.5754	70.9857	73.6896	74.5775	74.051	78.3701
	45.2027	45.165	44.9198	44.5973	45.699	43.3378	43.7884	44.8985	44.4663	45.4257	45.8582	45.3101	44.2943	43.4499	44.3872	45.2651	45.7406	44.189	43.7749	43.2895	43.7182	45.4521	45.3743	44.3126	44.719	43.6112	44.748	46.9186	47.1398	47.1194	49.5116	50.3241	52.0822	53.5594	54.0034	54.4756	55.6735	58.2836	58.9932	61.2091	61.7085	61.8995	61.855	63.5611	66.2629	67.2775	67.4338	67.2257	70.6246
	29.053	28.0991	28.1234	27.0256	28.1904	26.2938	26.0548	27.1837	27.8918	28.359	28.5932	27.9508	26.5737	26.0404	26.8503	27.0288	26.9566	27.3646	26.0925	26.48	25.7117	27.4515	27.6007	26.893	27.7507	27.0772	27.9633	29.4366	29.8172	30.6577	33.1942	33.8079	35.7243	38.6184	38.916	40.1803	42.3372	45.341	46.4569	49.6871	52.2426	53.5259	54.112	56.0225	60.0002	62.0146	62.8444	64.0034	68.2481
	23.8747	24.1561	23.9976	23.0677	24.1088	22.3984	22.8022	23.3844	23.6155	24.3877	24.7035	23.7016	23.045	22.9292	22.9552	24.038	24.0179	23.4462	23.0563	22.6654	22.741	23.3646	23.367	23.4396	24.0467	23.8922	25.0924	26.1068	25.9163	26.8531	29.4407	29.912	31.7184	34.406	34.4115	35.8985	37.7123	40.5548	41.8948	44.4037	46.3481	47.6503	48.0183	50.707	53.7329	55.9998	57.6881	58.3243	62.3122
	44.9298	44.8901	44.5276	43.835	45.2278	43.3036	43.6432	44.0131	44.7128	45.1992	45.9495	45.1864	43.5886	43.6191	43.8053	45.0187	44.9948	44.3732	43.8614	43.6205	43.2213	44.7783	45.6579	44.992	45.1967	44.76	46.1025	47.9717	47.9044	48.7634	51.0756	51.7744	53.9925	57.0236	56.6368	57.994	59.845	63.5512	65.6289	68.7249	70.8969	72.0715	73.5476	76.4984	79.7922	82.8156	84.4195	85.2338	89.221
	36.0979	35.4744	35.3317	35.1187	36.5475	33.819	34.4992	35.2674	35.5514	35.595	36.5277	34.888	34.8783	33.7597	34.0924	34.7101	34.8605	34.2932	34.4915	33.5586	33.9736	35.1296	35.7884	34.8547	35.2043	34.6067	35.7012	37.2273	37.4829	38.0484	40.6483	41.7052	43.4773	46.6283	47.1209	47.5894	49.7184	52.9521	54.947	57.0554	59.3483	60.2732	61.1792	62.7402	66.6815	67.8024	69.1245	69.2689	73.4004
	33.6116	33.8446	33.2678	32.856	33.0228	31.4831	31.9721	32.4914	33.1906	33.7251	34.1925	32.9611	31.9599	32.193	32.6133	32.7639	33.314	33.0609	32.6437	32.1006	31.8032	33.7646	33.5766	33.7058	33.4831	33.6835	35.2637	36.6132	36.8895	38.3133	41.0416	41.9773	43.9261	46.4478	47.618	49.2613	51.36	54.9769	57.0588	60.8584	62.805	65.3616	66.4815	68.9578	73.4549	76.1025	77.5318	78.7329	83.2087
	34.5923	34.5376	34.2098	33.3346	34.364	32.2858	32.4102	33.4387	33.7346	33.9597	34.3581	33.8654	32.8599	32.3422	32.5228	33.6384	33.7404	33.526	33.0242	32.2968	32.5427	33.5747	34.1639	33.7868	33.7192	32.5708	33.8642	35.598	35.0719	35.6994	37.93	38.5068	41.0168	42.8532	42.8384	43.8228	45.6155	48.4998	50.5257	52.7111	54.2339	56.1958	56.6184	58.5953	62.1169	64.1327	65.0882	65.6181	69.8753
	42.2817	41.9241	41.9093	41.2118	42.1022	40.2007	40.3841	41.5477	41.9938	42.9316	43.3	42.2389	41.3902	40.9028	41.1599	41.9561	41.9036	41.3077	41.3932	40.5488	40.9322	41.7261	42.229	41.6515	42.3953	41.1639	41.5708	43.1353	43.3651	43.7402	45.779	46.4683	47.3793	49.8714	48.1174	48.5897	49.0536	50.7906	51.0922	52.904	52.8599	53.5183	52.9219	54.4929	56.6092	57.7356	58.1972	57.3609	60.3239
	45.0677	44.9745	44.5802	43.1637	44.6418	42.3468	42.6154	43.5885	44.0384	44.4993	45.1376	44.0669	42.9889	43.0369	43.3907	44.0225	43.7066	43.6829	42.9283	42.6958	42.4428	43.7524	44.1603	43.22	43.1994	42.7602	44.1473	46.0692	45.7068	45.8808	48.1373	48.1859	50.7132	53.2438	53.2916	54.9216	56.1097	59.6003	61.0967	63.9787	65.9135	68.0583	69.5175	71.8175	75.8242	77.5574	80.2672	80.2452	85.3908
	51.9226	51.6614	52.1779	50.3731	51.6301	50.0035	50.4849	51.572	51.5984	52.3442	52.6734	51.6563	50.6438	50.6769	51.0254	51.9591	51.8426	51.2185	50.5883	50.1719	50.4506	51.675	51.7713	51.0417	51.8506	51.178	52.8328	55.2728	55.7462	56.6589	59.7532	60.6568	63.8966	67.267	66.9571	69.4836	70.7436	73.9744	75.784	78.7086	80.28	81.5807	82.0187	84.0953	87.087	89.3385	90.3174	89.441	93.8455
	28.6994	28.6148	28.4695	27.7408	28.4684	26.2206	26.6319	27.003	27.5345	27.9982	28.4109	27.712	26.7359	26.5385	26.4552	27.1028	27.8012	27.0158	26.5651	26.0099	25.4188	27.1999	27.1979	26.758	27.3155	27.6259	28.7234	30.2363	30.7798	31.4936	34.0323	35.3059	37.1155	39.8895	39.9828	41.6368	43.5723	46.4489	48.2046	50.5108	52.192	53.5837	54.046	56.223	59.3118	61.4548	62.5623	62.4805	66.0374
	37.7137	37.6427	38.0633	36.7499	37.9554	35.9201	36.2189	37.116	37.5708	38.0464	38.2386	37.7958	36.7651	37.1684	36.5545	38.2435	37.8232	37.3877	36.8045	36.5274	36.4887	37.5016	37.8632	36.9698	37.478	38.3181	40.0033	42.0418	42.5151	43.5347	46.5071	47.8635	50.0461	53.9843	53.8293	56.2094	57.8468	61.2391	62.9825	66.0765	68.3426	69.81	70.3509	72.7507	76.3193	78.6417	79.3818	79.7955	83.7271
	27.7424	27.3028	27.5438	25.8026	27.1708	25.3869	25.4973	26.4966	26.633	27.154	28.0332	26.6123	25.7224	25.4566	25.8282	26.975	27.2401	26.034	25.2861	25.0278	25.1706	26.2457	26.8553	25.8801	26.8018	25.6226	27.063	28.0987	28.3137	28.9043	30.573	31.4273	33.0984	35.7693	35.5847	36.4548	38.5255	40.7733	42.3256	43.6627	45.8567	47.4161	47.9104	50.0142	53.268	55.4883	55.5897	57.0716	60.7708
	31.808	32.1643	31.7944	32.0764	32.7114	33.5715	32.5564	32.0821	32.3832	32.6439	31.4822	32.0809	33.9739	33.4198	32.6829	32.139	31.0079	31.4109	31.661	30.5682	29.5645	30.4763	32.7641	32.5446	31.2659	31.0635	33.0332	35.6718	36.2948	37.9246	38.0801	41.2865	42.6733	43.6031	46.283	48.5758	52.2474	53.0554	54.496	56.0096	56.0655	57.3512	58.278	60.6557	62.5115	63.1087	65.6554	68.6928	69.892
	34.1674	33.9649	32.7899	33.4476	34.0163	34.6584	33.3881	33.1405	32.9273	32.8785	32.0865	33.23	33.7648	34.0399	32.9144	32.9751	32.6517	32.6609	33.3395	32.7437	31.9796	32.5811	34.6016	34.1666	33.7403	32.9245	34.197	37.3957	37.6392	39.7385	39.5804	42.2454	43.7992	45.6542	48.511	50.6766	55.0233	55.764	56.8745	58.6692	59.5789	61.3096	61.846	64.6459	66.7892	67.7724	70.0407	74.0152	75.6041
	40.5645	40.4813	39.9227	40.1438	40.7927	41.2035	40.0323	39.8201	39.8473	39.4768	38.9055	39.2563	40.2835	40.3237	39.8522	39.1526	38.5505	38.9645	39.4249	38.6854	37.5283	38.7373	40.6703	40.4613	39.4441	39.1767	40.6887	43.6949	43.8672	46.0537	46.1805	49.6446	50.7766	52.7282	55.3871	58.067	62.3965	63.7577	65.6539	67.4317	68.5104	70.2104	71.2752	73.8884	75.7875	76.53	79.7193	83.6496	84.8201
	36.1751	35.6802	35.1241	35.3101	34.9571	35.5537	34.3762	33.8923	33.8388	33.6459	33.2978	32.5897	33.7863	34.4807	33.5046	33.0917	32.1483	32.9342	33.3285	32.8436	31.8674	32.8234	34.0206	34.3084	33.2556	32.5234	34.1208	36.9111	36.642	38.5192	38.7501	41.3594	43.0047	43.8877	46.8954	49.0965	53.8818	55.0864	57.0517	58.9834	59.9237	61.3253	62.9071	65.7881	67.4372	68.508	71.1253	75.2517	77.0058
	38.0447	37.6945	37.7261	38.3059	38.5077	39.624	37.8232	37.8803	38.1749	37.5959	37.0435	36.7332	37.9174	38.0945	36.7666	36.9604	36.0566	36.777	37.0711	36.3564	35.7859	36.8568	38.6082	38.1367	37.5944	35.5519	37.3259	40.1377	40.0304	42.493	42.4843	45.8639	47.2521	49.2688	52.1615	55.2821	59.2171	60.5692	62.5247	64.2505	65.8064	67.0375	68.6358	71.4574	73.4035	74.3414	77.6862	81.3297	82.6177
	37.7591	38.4025	37.4006	37.8073	38.4454	39.1176	38.4078	38.3476	37.8827	37.5361	36.8199	37.3624	38.15	38.3947	37.4737	36.7731	36.2208	36.3283	37.0322	35.8739	35.1605	35.8264	37.9029	37.9653	37.471	35.1732	36.9704	39.3061	38.3213	39.6595	39.2103	41.3588	41.7042	42.6088	44.9639	46.8936	50.0996	51.0387	52.5238	54.6208	55.1932	56.2634	57.6881	61.0448	62.7963	63.5298	66.9459	71.2386	72.4711
	45.84	45.8768	45.4728	45.5229	45.8749	46.6695	45.7599	45.3602	45.2599	45.1347	44.8629	44.6495	45.6435	45.9788	44.9709	44.3406	43.9066	44.4491	44.8203	44.1019	42.8883	43.8	45.8221	45.8171	44.9745	44.2032	45.5653	48.3208	47.8164	49.3822	48.8383	51.7642	52.3535	53.7544	56.264	57.9341	61.9516	63.2535	64.4096	65.9904	66.289	68.0729	69.4711	72.3477	73.8104	74.0201	77.0319	80.7617	82.3217
	36.3352	36.1246	35.9869	37.3354	37.6133	38.4256	37.4209	37.0155	37.4733	37.7113	36.6069	36.4847	37.5804	37.4362	36.5935	36.5398	35.9039	35.771	36.4195	35.9454	34.578	35.1166	37.4114	36.7567	36.6399	35.7621	37.5448	40.3386	40.5678	43.1442	42.9335	46.3145	47.3106	49.0538	52.6218	54.6631	58.5238	60.0663	61.5433	63.5452	63.8664	66.0718	67.5696	69.567	72.2321	72.4625	75.3087	79.2866	80.5521
	39.5579	39.9458	38.9596	39.3162	39.8521	40.3402	39.2551	39.0775	39.0261	39.3894	38.8179	38.3911	39.6414	39.5225	39.1152	38.9013	38.3482	38.5622	38.6109	37.7566	37.0697	37.9404	39.5465	39.8691	38.6445	37.7479	38.7435	41.4119	40.8311	42.2972	41.4581	43.1121	44.2428	44.938	46.4127	48.6395	52.0253	53.2127	53.7	55.269	55.8399	57.145	58.3963	60.3639	61.8594	62.3737	64.7476	68.4394	69.0367
	38.7812	39.0145	38.1513	38.5814	38.7585	39.5762	38.4614	38.2515	38.2169	37.7793	37.3704	37.4434	38.2316	39.1725	37.6286	37.6846	37.3255	37.5031	38.3253	36.8557	35.8765	36.5926	38.7565	38.1127	36.9831	34.8293	35.7879	38.1371	37.9147	39.1776	38.8691	41.0023	41.5916	42.3745	44.8376	46.4384	49.8784	50.1874	51.1686	52.6616	53.1648	54.0919	54.6387	56.1922	58.3105	58.2998	60.5397	63.7798	64.7515
	69.2952	69.3545	68.8895	69.0152	69.465	70.4202	68.6869	68.5562	68.5274	68.1889	67.7388	67.0104	68.5096	68.6935	67.6642	66.8781	65.8669	66.1332	67.0758	66.0084	64.6662	65.6402	67.7373	67.943	66.2231	63.8369	65.5231	68.552	67.9762	69.2748	68.1319	70.8807	72.0338	73.196	75.2339	77.0176	80.8012	81.2748	82.2399	82.9984	83.3455	84.1726	84.6403	86.6593	88.1865	87.6509	90.5579	92.6109	93.3913
	36.5442	36.6418	36.1244	36.0973	36.3543	37.1051	36.4325	35.9912	35.6623	35.898	35.588	35.4637	36.5618	36.7629	35.8514	35.9094	35.1226	35.4846	35.8216	35.3906	34.2488	35.2862	37.1258	36.9335	35.6566	35.2724	37.0147	39.3274	38.505	40.4298	39.6699	41.8925	42.5896	43.3846	44.8413	47.0173	50.4035	50.7752	52.0528	52.5374	53.461	54.1384	54.5956	56.8628	58.4714	58.3938	60.9571	63.7015	64.9969
	40.5695	40.3027	39.6802	40.2121	40.9682	41.4917	40.3971	40.3143	40.2808	40.1162	39.7844	39.8535	41.1244	41.0634	40.3106	39.8569	39.1469	39.5594	40.1009	39.6992	38.5456	39.6024	41.8754	41.4848	40.7729	40.1675	41.6707	44.557	44.9254	47.0689	46.6826	49.3076	50.7473	52.1168	54.8271	56.7238	60.5214	62.1521	63.4026	64.8214	65.5185	66.845	67.9853	70.4947	72.3741	72.81	75.7855	79.3889	79.9092
	35.8257	35.9508	35.479	35.6385	36.38	36.8792	35.5443	35.7635	35.7242	35.387	34.8666	34.5604	35.5591	36.5015	35.5459	34.9843	34.1392	34.8942	35.0476	34.6358	33.5034	34.5633	36.7918	36.417	35.7511	34.0818	36.3857	38.8466	38.2802	40.6675	39.5806	42.8393	43.6963	44.4233	46.9563	49.7798	53.4113	54.6021	56.2964	57.5843	58.4512	59.5417	60.9311	63.2031	65.393	66.0285	68.6038	72.5014	73.1674
	29.1858	28.9614	28.2591	28.9176	29.4609	30.3163	29.2332	29.22	29.1174	28.4585	28.1592	28.9687	28.969	29.8123	28.7967	28.6025	27.8074	27.9788	27.7264	27.5947	26.3813	27.3672	29.1313	29.3716	28.0346	27.1577	27.9986	30.7146	30.0616	31.804	31.3258	33.7402	34.4387	36.008	38.2569	40.4426	44.2947	45.2667	47.0819	49.185	49.6138	51.074	52.2511	54.8213	56.951	57.6905	60.411	63.5704	64.7244
[truncated: 86 more rows]
[truncated: 275 more columns]
