# Supplementary material for: Regulation of store-operated Ca2+ entry by IP3 receptors independent of their ability to release Ca2+
Source: eLife journal article supplement (doi:10.7554/elife.80447), 2023-07-19
Supplement: fig2-figsupp1-data1 [file Figure 2- figure supplement 1- data 2.pdf › Figure 2- figure supplement 1 source data/Figure 2- figure supplement 1- data 2.pdf]

# STIM1 Western Blot (Panel E)

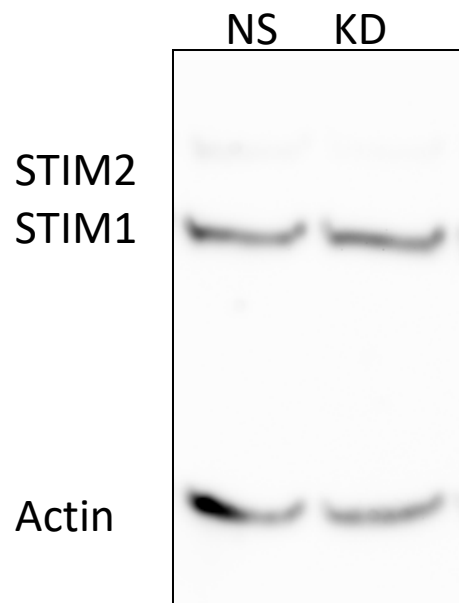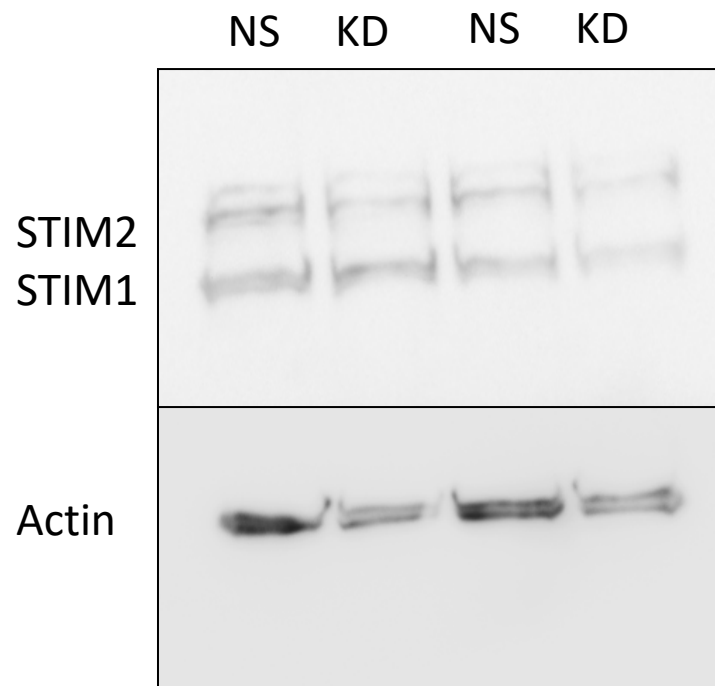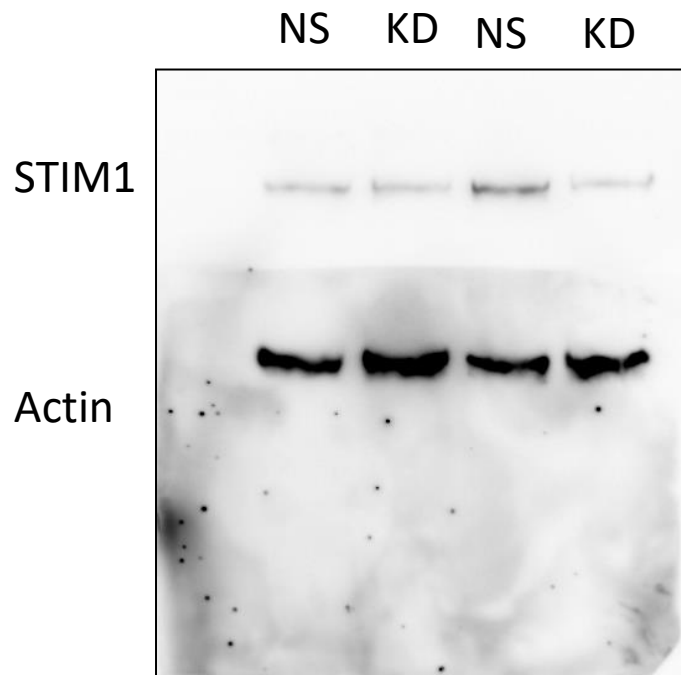

Orai1 Western blot(Panel E)

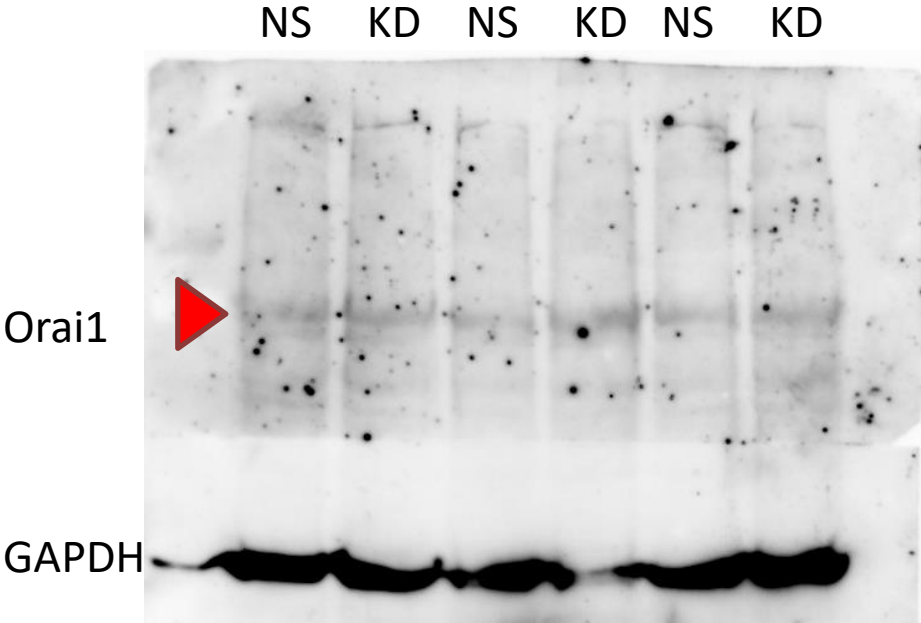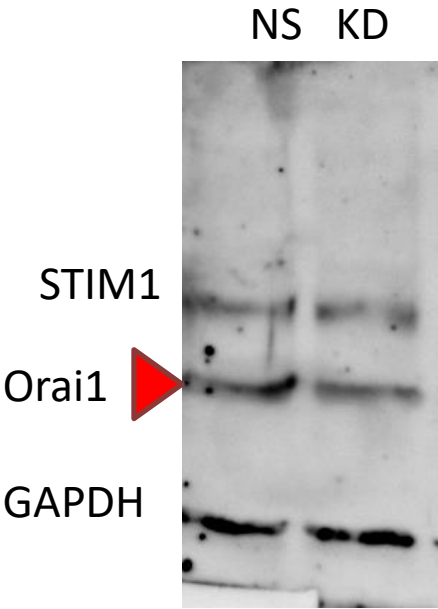

IP<sub>3</sub>R1 Western blot(Panel M)

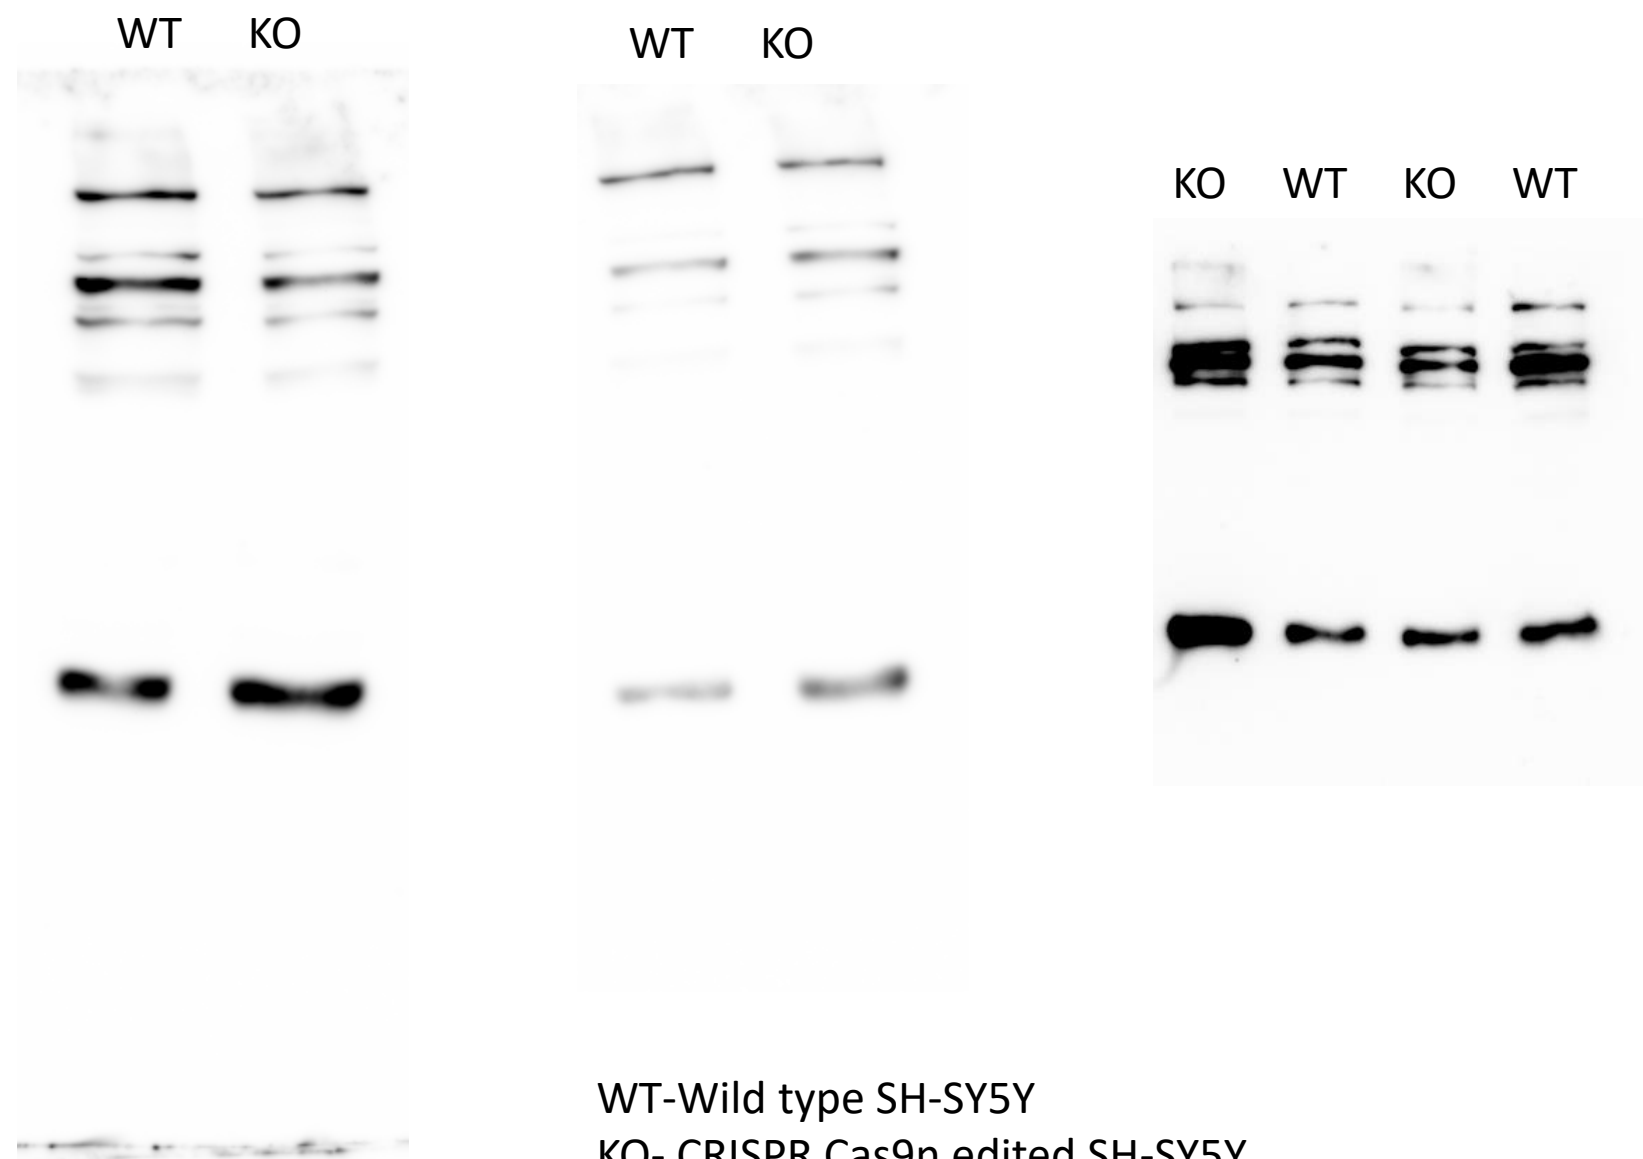

WT-Wild type SH-SY5Y  
KO- CRISPR Cas9n edited SH-SY5Y  
Each WT/KO indicates each biological replicates
