# Supplementary material for: Regulation of store-operated Ca2+ entry by IP3 receptors independent of their ability to release Ca2+
Source: eLife journal article supplement (doi:10.7554/elife.80447), 2023-07-19
Supplement: fig2-figsupp2-data1 [file Figure 2- figure supplement 2- data 1.xlsx]

## Sheet: Panl A
	Time (s)	shRNA NS																IP3R1 shRNA+IP3R1																		IP3R1 shRNA+IP3R3											IP3R1 shRNA
	0	42.8437	61.272	134.256	87.4108	63.2087	162.009	12.6474	101.062	40.8712	87.878	40.6971	105.848	102.513	94.7172	117.628		29.0698	109.661	60.7168	23.0811	101.412	55.9161	23.9804	99.0123	130.259	13.5248	95.3328	157.076	60.9826	83.6546	178.138	58.1036	71.6943		40.7815	130.482	28.1681	50.7633	42.7265	42.9556	78.7292	92.9592	96.1315	100.144		52.2217	5.35192	70.6063
	2	56.0914	66.7526	141.937	76.3234	56.8793	156.395	12.0447	102.81	40.9504	81.691	42.7638	109.427	104.585	101.02	114.509		29.7398	106.324	50.1015	21.2606	99.3322	54.361	22.4806	101.817	136.155	13.3953	90.1427	163.958	64.0631	84.1848	199.304	47.3161	58.4636		42.7478	118.722	25.4863	59.7483	48.461	42.5243	80.4162	94.1765	94.1831	102.355		58.5741	11.5148	61.9262
	4	44.2974	59.8749	142.614	69.6363	67.8945	150.038	16.5416	98.9783	42.5137	77.4641	41.8446	97.8789	109.264	91.8009	109.576		24.3558	112.023	58.9216	21.9589	102.465	55.7635	20.627	102.617	136.849	10.2246	87.0157	164.422	89.3702	100.972	183.517	61.9913	50.2447		42.8011	124.863	26.2483	54.7094	41.2198	44.083	77.4331	105.24	89.3898	85.1846		56.7839	9.71015	64.6787
	6	55.047	66.5213	146.1	66.1305	77.2219	144.534	12.2515	90.3855	45.9501	80.2526	41.5373	108.005	102.665	102.534	113.238		24.2339	99.987	59.0993	22.7467	97.196	59.1452	15.0299	105.289	133.849	11.5492	89.4159	168.307	80.5799	81.4633	193.83	57.1009	59.2887		42.1629	128.899	32.4163	54.2768	47.4575	39.6711	80.1457	93.5238	85.0498	104.85		55.0623	6.88297	67.9297
	8	46.7784	75.4591	142.082	79.261	69.1861	165.535	9.96981	93.7767	44.4315	75.8785	49.6119	102.493	97.0947	107.469	107.49		28.1433	105.184	59.9958	18.548	96.5419	57.539	18.8708	103.377	136.992	13.5804	87.061	170.99	65.8171	81.1916	175.05	50.5756	63.4834		45.9338	133.101	27.9694	59.0993	43.0089	42.9076	77.2281	104.022	87.5145	98.1905		51.0533	10.1445	56.4243
	10	52.6161	63.3899	140.42	80.02	63.9693	150.661	13.1087	99.1892	40.7815	86.0404	43.7779	114.249	103.17	108.216	109.853		34.1992	115.627	62.9052	26.8204	107.448	60.9248	19.9571	111.916	124.524	13.7888	88.2681	169.222	55.1879	75.5947	176.855	64.0397	63.8639		42.0939	131.223	27.4288	51.7433	47.3161	43.5533	75.0282	97.9466	81.1853	86.5695		49.3628	8.87203	53.8755
	12	52.1153	59.7483	136.96	73.5263	63.2029	148.582	16.598	102.789	44.1152	85.0819	42.9236	118.002	104.613	107.11	117.232		24.7564	104.55	58.1493	18.7141	107.744	63.0511	21.2029	105.834	128.478	13.914	92.9592	159.093	84.883	83.5015	190.818	65.2152	53.8282		40.4494	124.245	23.9268	53.6994	42.2851	41.9931	66.0654	102.43	92.1644	98.1092		55.1446	9.93451	54.0508
	14	55.9556	66.8772	137.165	76.1564	74.4508	139.988	16.4711	97.0947	36.3432	76.67	38.6396	109.81	95.7956	106.457	121.849		28.8353	115.598	55.6505	22.7612	104.224	56.9475	22.3307	108.315	130.868	8.18195	84.5881	150.753	75.262	84.7932	192.32	61.8809	57.6074		42.4977	134.428	25.7416	57.3512	44.8505	45.2272	88.8609	95.5272	89.8544	92.0255		53.9312	12.8285	54.2868
	16	48.4555	70.7082	149.698	75.2682	57.1066	152.632	14.1877	95.3731	39.918	79.8065	42.9076	102.293	106.065	107.321	119.63		29.2096	121.171	57.8126	24.5365	99.3049	65.3272	19.4228	112.727	125.702	11.7738	99.8641	165.254	83.5143	79.4239	182.396	50.085	60.3243		41.7757	128.333	25.9776	58.5551	45.529	38.9428	83.5653	97.1825	85.326	90.8388		51.8094	9.04122	50.2757
	18	52.9952	66.5569	161.377	79.9258	63.817	153.572	13.3167	101.144	38.6866	90.8059	41.8234	102.21	106.128	95.2525	110.387		30.9604	107.687	57.1919	26.3173	102.32	59.6506	20.5791	106.184	134.358	10.1973	92.8398	171.465	71.4822	83.8078	184.681	55.436	63.7994		41.6538	124.727	23.489	54.4228	45.6045	44.9634	67.7455	81.299	79.6057	86.421		56.5816	9.74066	60.2456
	20	47.6426	69.6904	144.031	75.4283	68.9643	155.022	14.2946	87.0027	38.7807	85.9373	37.1094	100.774	105.031	107.532	122.797		30.9604	105.813	57.6416	28.5064	95.0516	62.8644	22.9163	112.296	135.903	14.9274	88.737	157.818	72.0704	96.7777	189.639	68.0198	64.3271		45.0388	129.943	26.3321	54.8838	48.822	42.1205	66.7229	89.4421	93.9365	84.1976		51.9262	7.09237	58.4019
	22	57.8411	64.0162	144.307	68.3063	54.7937	165.315	14.6666	107.61	41.1088	89.0044	43.7886	101.927	97.4865	107.934	108.322		24.5365	114.024	54.3834	22.9599	104.968	53.9571	19.5753	111.157	136.092	12.8272	89.4813	163.574	64.809	91.9991	197.707	68.4736	53.5484		45.3295	114.032	23.5667	53.8058	46.9032	43.8956	78.4232	108.379	85.1718	86.6987		54.6956	14.9583	58.3769
	24	52.8167	64.515	134.193	65.5218	60.5204	161.905	15.1792	102.334	43.3076	82.5787	42.7319	110.045	101.158	102.065	135.589		25.4127	106.745	54.1309	20.2966	110.929	64.3682	17.7619	106.927	119.571	13.0302	88.6066	172.058	77.9868	78.1426	163.627	60.2551	60.5724		41.0085	116.443	30.2463	56.0348	49.2056	41.167	75.2436	84.9792	88.216	87.8585		52.1486	10.372	64.7646
	26	55.6053	63.6765	139.19	72.0704	63.4133	139.78	13.8259	96.7305	38.7859	78.7355	37.8315	102.237	101.948	98.489	121.499		27.9793	107.342	61.272	22.6451	104.092	55.295	21.5204	96.1517	128.303	15.0486	87.8326	171.51	75.823	84.2296	179.649	65.7462	61.7242		41.675	109.668	23.7613	52.6774	49.513	46.9466	74.813	90.8388	88.125	94.2898		35.5341	9.08883	48.1999
	28	44.3189	58.7383	147.034	82.1978	58.1664	170.65	12.0953	95.3395	36.5448	83.0365	46.697	101.542	94.3366	104.919	114.386		32.4569	113.094	61.301	19.5705	101.645	55.4303	19.1514	103.967	142.356	11.1006	85.5767	158.185	90.0116	78.3796	183.424	55.0808	62.8119		40.676	123.037	27.8204	51.8931	43.58	41.241	80.391	97.7029	83.7376	90.0378		60.895	25.4425	84.294
	30	48.8056	67.4894	148.458	72.2223	65.3508	154.237	14.8528	93.3311	37.6754	76.9923	43.9973	105.352	95.065	100.753	120.333		26.9242	116.151	61.0231	23.3044	101.055	57.1521	19.3418	104.968	121.655	10.8492	96.2862	156.608	61.0752	77.2591	211.968	60.8554	53.3694		48.4063	117.401	24.6293	60.48	43.826	46.4803	81.1159	107.864	79.6433	83.5589		84.7412	44.7871	90.674
	32	65.7344	66.4443	143.593	78.923	75.453	230.591	26.4553	152.883	72.4046	131.378	77.2591	161.325	235.509	190.866	179.003		49.6229	134.945	92.3959	37.8523	145.839	88.008	39.7971	140.941	232.66	25.5992	160.099	349.623	70.1355	88.8283	226.031	72.9648	80.5484		73.8809	194.782	43.0355	84.9215	76.6638	70.3644	146.403	91.504	121.201	114.988		84.0062	46.0567	93.9474
	34	104.106	95.2793	209.984	120.585	90.977	356.941	21.2414	224.877	82.8774	202.145	102.472	275.932	289.765	293.19	302.624		88.0535	323.005	145.064	87.1516	317.374	183.414	77.1164	344.486	365.916	70.2921	297.43	648.702	113.974	131.695	390.039	144.12	140.989		128.463	299.943	84.3256	152.247	131.967	135.998	152.381	135.424	187.069	185.792		85.2513	46.3918	96.4875
	36	168.315	126.285	264.367	171.492	115.918	402.437	53.5036	307.744	100.822	290.819	110.722	333.288	298.779	334.482	307.412		145.039	386.192	165.904	144.104	369.055	208.135	97.7638	394.432	386.415	103.218	332.975	639.013	150.503	185.405	456.06	205.68	159.445		181.446	348.161	93.1716	211.618	167.908	170.024	180.657	189.104	196.804	221.483		86.1277	40.0369	98.544
	38	167.58	140.596	264.501	206.418	146.518	350.356	56.0518	278.62	97.2095	265.833	103.814	353.807	254.341	311.494	315.54		145.504	409.331	172.391	147.799	369.761	203.045	100.609	381.636	368.612	102.969	321.113	590.438	160.892	186.671	435.949	201.816	177.872		194.422	336.025	93.5571	204.752	172.589	175.332	180.296	154.355	211.927	224.511		84.6794	39.6026	95.6646
	40	180.945	128.999	231.767	178.258	132.098	316.207	56.2273	253.633	94.3032	231.855	98.6248	295.324	263.624	269.268	277.743		149.028	358.183	164.929	136.013	326.015	182.331	99.748	358.135	348.13	104.175	296.154	530.525	161.117	181.168	420.761	181.865	152.934		179.852	296.181	91.7877	188.037	163.435	148.07	176.855	169.035	214.996	180.176		73.6339	37.2741	93.4126
	42	163.819	120.029	231.14	171.178	125.233	305.643	57.6131	240.314	86.3177	244.516	92.8266	261.006	240.96	259.73	244.814		121.268	323.063	149.466	131.757	307.647	169.587	90.8322	321.56	318.73	99.8231	265.344	547.672	145.626	184.37	405.851	158.819	138.839		177.276	277.883	90.2214	185.386	142.768	140.804	184.23	163.295	193.519	202.375		72.3957	36.6849	96.4599
	44	159.875	114.806	210.148	161.117	111.35	249.088	46.6862	214.881	82.0774	231.569	90.4117	237.723	219.045	238.341	243.338		121.052	309.482	153.118	118.995	261.477	161.204	86.2403	303.253	298.968	84.204	269.652	452.748	145.528	169.293	364.487	166.705	149.922		167.412	253.114	76.3419	164.43	146.444	134.553	168.591	158.904	187.619	191.029		73.3536	37.912	85.9883
	46	143.164	116.472	192.832	132.525	110.943	247.534	43.7993	216.385	69.5282	204.219	84.7034	232.152	192.291	211.494	221.185		106.366	303.116	120.748	110.715	260.271	144.039	78.7105	282.977	294.682	71.5852	233.356	472.954	126.004	157.647	357.768	176.745	130.467		143.715	253.126	73.2087	156.038	135.502	124.321	166.115	133.639	162.07	175.969		69.0512	36.8498	91.9892
	48	118.222	104.822	180.361	140.116	106.044	248.449	43.393	191.318	76.1008	183.873	76.5214	206.236	169.249	213.706	201.746		101.941	289.107	117.159	99.5843	245.573	148.334	72.5324	236.402	272.065	73.3186	211.309	404.356	131.278	151.887	285.45	162.956	124.494		123.089	237.6	68.8985	143.844	125.838	111.329	130.668	148.672	175.623	190.099		72.1027	29.9656	90.4609
	50	118.112	98.6996	166.459	120.882	100.657	251.833	35.4665	181.14	71.3914	165.711	74.1688	186.964	175.514	185.132	195.982		100.158	263.368	128.922	104.05	224.704	124.75	71.7913	239.659	267.626	68.0078	203.546	383.166	121.104	152.691	329.228	134.389	110.458		122.947	218.433	74.6104	133.405	123.809	107.73	154.769	137.989	173.554	201.786		68.7485	29.8616	84.8818
	52	102.127	98.1702	156.931	128.364	89.6056	207.067	30.6533	173.175	65.7108	153.951	67.6442	182.928	164.194	186.122	183.508		91.1745	257.299	123.742	88.1185	233.832	128.662	66.2074	245.538	249.17	63.7994	191.53	354.754	133.257	130.93	274.47	123.712	123.187		123.524	218.992	60.5031	128.731	121.782	101.165	161.818	134.859	152.113	192.571		66.1142	29.7752	78.9133
	54	102.969	78.155	144.502	120.073	83.9292	202.136	31.6315	160.728	61.498	159.402	63.7877	165.526	146.6	189.028	188.465		83.6482	244.986	108.005	84.6842	214.558	124.855	62.2819	233.455	247.36	56.692	194.092	335.38	120.978	139.788	286.712	117.51	112.174		119.356	188.551	66.0358	125.323	114.959	104.85	144.909	119.475	150.953	188.761		63.5152	29.5543	89.2513
	56	106.745	80.3092	160.366	124.765	83.6163	214.205	29.5896	162.782	63.7175	159.016	57.6416	168.413	160.168	171.555	176.042		85.3324	251.599	108.132	88.8022	203.165	128.968	57.3853	244.436	245.147	58.641	192.214	343.136	119.106	144.949	258.901	127.692	117.723		120.229	196.089	63.0394	120.971	108.068	99.7139	137.561	129.813	154.229	177.074		64.9193	30.7582	84.4099
	58	102.969	85.4417	146.198	120.429	82.0457	197.059	32.7463	153.085	54.2487	163.696	62.1191	167.023	161.498	168.032	181.242		77.6693	238.971	111.772	85.2296	214.298	115.794	59.9901	216.259	249.88	61.0926	188.78	333.854	106.829	136.344	284.334	122.55	98.5705		103.946	195.796	61.1967	112.741	112.102	96.98	131.75	128.058	147.182	197.255		63.7221	32.7767	83.013
	60	93.1982	79.2484	138.959	98.6792	94.0898	183.639	32.5025	155.742	57.6245	151.553	58.3721	162.026	155.132	163.792	166.732		75.5886	221.409	107.857	74.0952	210.189	111.586	62.637	199.74	221.377	52.3489	174.324	344.716	94.6437	135.4	258.374	119.519	104.231		102.983	190.425	58.1893	117.078	105.743	93.3045	109.384	116.188	159.961	179.945		66.3719	28.2381	83.6274
	62	87.943	73.7586	155.115	108.061	91.9727	193.936	24.2729	151.895	53.0957	144.868	57.5049	163.801	146.452	166.415	155.928		81.881	211.422	99.598	79.8944	195.143	109.697	56.2952	214.444	225.394	54.6306	171.815	297.188	98.7675	119.356	240.744	121.067	103.953		97.223	175.914	52.9339	117.936	90.8322	89.6252	127.875	122.894	129.859	165.008		60.6603	26.2497	76.1286
	64	90.9572	82.852	145.651	103.765	88.151	193.461	24.6635	155.869	54.2656	145.267	54.625	165.939	154.887	165.324	156.803		76.6762	227.2	103.863	75.102	199.413	110.921	57.5447	195.962	219.055	44.0134	160.142	295.926	107.321	124.426	226.55	118.274	108.407		98.8967	165.175	54.7544	96.5487	103.46	86.5178	129.06	105.617	133.272	166.388		67.0531	21.2589	81.2825
	66	90.9506	80.3281	128.8	103.786	91.4117	163.121	28.3919	151.319	57.6188	135.322	59.6103	155.606	158.965	164.404	155.521		71.6215	210.23	94.6838	79.9195	180.741	90.4314	52.1153	181.818	218.264	49.9033	167.094	277.679	100.028	124.893	219.912	108.52	96.6295		98.6452	163.504	49.0083	95.4066	98.9035	87.878	123.569	107.568	120.785	181.725		61.5938	23.6525	77.2599
	68	80.196	88.164	140.124	104.78	82.1471	174.478	24.3412	138.871	53.8226	145.528	53.2856	168.6	142.857	143.31	164.194		72.2405	223.909	83.3485	70.3042	191.52	101.501	47.648	183.349	216.762	44.8344	145.708	309.858	90.5365	123.494	232.991	102.935	110.23		96.3131	168.626	51.1061	90.7402	98.5298	87.2682	117.254	118.833	127.974	170.605		62.0688	24.744	82.0554
	70	70.0693	86.0533	129.859	96.2391	76.0823	174.251	23.9025	137.15	52.3433	136.329	53.9179	148.854	135.361	148.549	144.534		66.8	202.355	93.6902	67.4716	173.78	95.1319	47.7243	186.066	219.69	41.4579	147.198	281.253	85.3453	117.488	222.123	96.1449	95.4468		84.6522	159.944	44.7484	91.0165	90.7139	80.3659	106.759	105.512	135.652	168.484		59.1952	27.4347	76.1665
	72	79.3111	91.0625	135.196	102.962	72.0522	156.429	23.8781	125.944	56.0235	124.577	52.4324	154.178	149.533	141.672	149.897		64.6208	194.996	95.2391	65.8171	171.582	95.5608	52.3433	180.046	204.108	40.5495	139.676	269.516	98.0076	117.371	240.314	97.5	104.015		84.6329	161.55	50.9236	94.6771	93.8766	72.9892	115.663	101.247	126.824	159.351		62.2965	21.0637	69.3859
	74	89.6449	71.349	135.251	97.277	74.4876	161.221	23.3626	131.046	50.118	133.67	60.7168	158.887	124.14	142.437	146.297		59.042	216.207	93.5105	63.0394	177.569	103.606	43.6549	173.789	207.585	44.6785	151.495	273.403	93.6968	102.444	216.238	89.5991	101.921		83.2529	160.754	45.788	83.5015	86.1242	76.2368	108.931	105.827	122.76	159.944		59.5342	23.8302	68.5667
	76	82.2613	76.2739	127.677	108.916	72.5385	174.097	22.1761	135.88	54.4677	122.76	52.4713	148.507	128.823	146.19	150.13		61.081	205.912	81.5708	59.5816	182.62	88.7631	51.1559	171.393	209.073	36.814	132.285	270.459	91.9793	113.663	206.307	113.115	93.0853		86.6406	160.202	47.2236	89.3767	78.5106	67.4299	101.872	110.173	118.134	174.269		57.5998	18.8651	74.1597
	78	72.9892	76.8807	129.083	87.1063	81.2801	163.173	27.2357	128.762	55.1203	129.574	55.1597	147.42	138.736	142.574	148.681		57.9609	202.635	83.9931	59.7311	161.221	90.5168	39.0684	171.044	201.816	39.4665	150.878	255.502	88.0795	116.406	222.646	104.676	94.0898		78.7355	149.119	50.2392	77.1722	81.7797	75.9279	108.471	99.3186	123.381	157.553		57.8896	18.9331	76.2261
	80	72.0765	75.8168	133.444	105.143	66.1541	162.13	27.5031	131.162	52.0153	116.479	50.8849	137.482	126.133	135.935	143.285		54.7094	199.601	84.9343	62.1133	170.667	94.0898	45.4697	175.459	194.296	38.3734	150.47	261.477	95.6413	120.444	213.592	107.878	95.9635		72.7332	153.942	43.4732	84.9215	78.1488	69.2341	99.9528	107.885	110.394	143.415		60.5136	18.9651	64.145
	82	71.1735	68.0496	120.059	99.0191	78.0553	152.381	20.3492	125.044	51.4826	120.229	59.1911	145.275	134.757	141.841	169.623		53.9403	211.958	83.7184	54.0244	160.875	87.8391	44.9581	158.151	188.847	37.2391	133.42	261.127	88.737	117.701	189.888	93.8433	90.5234		77.5077	154.912	45.5721	87.3071	81.9063	70.0572	101.638	97.007	102.43	181.669		66.3235	22.0753	65.7894
	84	74.5122	85.3388	114.922	92.5615	73.3186	164.684	23.0375	116.414	49.7273	120.592	48.461	141.39	122.625	133.943	150.578		62.0319	177.367	89.5729	63.0161	160.082	84.204	43.81	163.661	187.828	36.0953	138.402	277.654	94.3699	108.909	206.398	104.557	95.5071		76.2801	160.435	43.1849	86.208	79.1608	63.5419	97.8383	106.198	109.569	162.886		59.2908	21.8666	74.7728
	86	73.0013	67.2871	115.372	92.3761	81.0149	157.596	21.5733	117.525	52.4769	120.978	51.3164	137.347	130.56	128.563	135.094		55.7635	202.096	78.0553	55.7748	152.146	89.1023	40.4283	164.185	186.009	37.2339	127.219	249.216	86.1951	112.303	205.761	86.0597	95.9232		67.9542	149.74	44.7269	79.0294	77.8124	54.5463	119.275	90.1034	116.027	149.939		55.2269	21.4613	66.9941
	88	73.8871	77.7004	116.801	87.2876	73.3186	152.205	20.6941	125.808	49.1563	128.754	51.1946	145.243	130.544	119.076	147.7		63.1387	175.614	85.0562	57.0043	153.782	83.7057	40.5916	153.959	208.879	31.7629	120.192	241.005	77.7689	93.0455	198.85	91.8009	95.5541		72.9221	141.511	37.4052	76.7381	72.0461	62.1133	89.5925	94.0431	118.171	151.003		61.0928	17.9591	72.5645
	90	62.2528	66.1423	122.334	100.589	74.1014	153.009	22.0795	129.283	48.45	118.538	48.532	131.564	125.921	131.843	147.659		59.9728	182.844	76.4409	60.2666	164.684	88.8283	39.8549	156.047	192.031	30.9201	125.921	210.353	79.0043	99.0123	190.713	86.563	91.1349		69.5762	153.404	45.2164	79.9321	78.9105	68.9943	107.026	92.2503	119.076	167.793		63.3119	12.9633	61.8668
	92	67.2812	82.3818	119.541	85.6411	80.977	149.64	17.1909	117.335	45.6045	125.482	50.4487	131.525	122.767	127.631	135.998		45.8042	189.917	81.1474	48.0077	152.431	80.8761	40.6022	148.953	181.549	33.5607	118.105	240.088	80.4666	92.0586	199.334	93.7434	92.9062		73.4041	141.986	43.4037	78.9668	72.6906	59.1854	89.429	78.0802	108.442	153.471		58.3802	16.5636	68.0971
	94	67.4894	77.0357	128.716	90.2017	73.8809	145.986	23.4306	112.698	46.3665	120.971	48.8713	143.31	134.342	124.494	153.942		51.0065	179.584	82.5723	49.7713	168.804	82.871	37.1457	148.656	184.183	36.985	122.491	234.298	71.0102	110.707	181.428	84.0122	78.798		71.355	149.657	40.0441	85.2553	68.8745	60.0016	98.4755	88.2225	108.308	150.171		54.9126	18.4226	63.8949
	96	78.3608	73.8626	131.363	95.42	62.2877	147.248	12.7581	111.515	42.2639	112.957	45.8528	131.951	120.333	125.112	148.738		50.3219	172.301	77.7004	47.8878	153.976	84.4728	35.5746	135	202.535	31.4698	120.733	215.016	79.9886	91.4051	184.568	87.995	93.1716		70.4488	145.545	43.1795	80.3092	67.6323	56.3065	87.3589	83.1065	113.591	168.582		52.2559	15.5434	63.5118
	98	68.8146	65.8821	110.002	89.1154	66.4443	153.244	15.5949	122.483	43.6977	113.108	45.2002	133.07	137.015	133.366	144.876		49.5789	170.158	77.5698	47.5446	142.042	80.8194	40.4546	142.211	196.951	27.7609	116.552	248.229	65.3803	104.21	204.37	79.7374	87.2358		64.8619	137.134	45.2703	73.4285	66.6754	55.6222	87.9755	86.7698	104.106	147.831		57.4816	15.0986	67.8879
	100	76.7443	62.5147	129.49	88.7305	66.717	146.141	17.3653	123.96	52.8446	116.195	50.2998	133.163	120.555	133.592	141.905		54.4621	191.549	78.2797	45.9501	147.182	87.3071	35.5643	139.788	187.876	26.8599	114.69	218.654	82.674	110.979	187.648	84.3384	99.0055		56.692	142.235	40.5337	75.7181	70.5393	53.6938	90.3986	81.7417	98.1905	149.417		56.0569	16.2289	63.2573
	102	73.2148	71.4761	116.903	87.6443	75.0159	151.603	16.5416	107.462	51.4383	114.973	48.7782	126.277	117.225	128.264	138.792		47.0063	177.331	76.5028	50.9568	141.905	81.9506	38.17	138.823	174.55	30.3618	108.867	218.844	77.7004	101.611	172.103	85.6411	84.5561		59.3633	136.984	38.5508	66.462	71.8762	52.6885	90.7665	93.2912	93.4706	147.453		52.7423	14.2187	64.3251
	104	59.7714	67.1504	99.4412	102.955	74.5981	156.14	20.4976	119.681	46.3449	106.808	42.519	131.247	131.309	121.521	134.819		54.6138	175.477	85.0626	45.0441	136.116	78.7105	35.0604	152.959	171.241	25.0794	116.969	232.02	70.9256	98.5366	190.578	74.5367	91.0362		59.0764	137.632	35.9354	68.4139	74.6288	57.0327	104.509	92.9393	100.356	155.073		51.7737	15.1381	66.8918
	106	69.5522	63.1795	112.411	79.7563	77.3647	149.839	19.0848	118.59	45.9338	108.888	51.0287	120.748	129.014	125.361	132.556		45.7934	162.695	76.2183	43.826	135.518	73.9421	30.9705	149.234	169.453	24.1753	111.107	220.495	62.876	99.7685	185.377	68.9104	81.4444		63.2555	133.132	40.5969	63.858	68.7308	56.641	96.3602	81.1474	112.77	153.597		55.3044	17.4372	58.4704
	108	64.9855	78.7542	109.682	89.8478	67.1385	153.749	19.3323	109.228	46.876	107.377	44.0188	140.412	125.497	122.117	128.769		48.7125	166.785	75.6564	42.7425	150.745	80.8257	34.1174	130.236	163.749	28.4268	119.091	213.955	76.7691	100.212	173.238	79.2171	78.4232		61.191	137.997	32.8936	71.5549	66.7763	55.4416	89.8347	80.8194	94.3499	149.864		53.0031	14.1386	62.7031
	110	64.0866	57.0214	101.384	78.18	72.8185	143.933	22.2292	115.576	47.2182	109.377	46.9846	120.11	110.394	127.944	143.293		46.5995	178.671	78.673	45.7124	135.73	74.5735	32.5888	143.382	168.085	26.8896	98.0618	221.888	67.3823	110.586	176.974	78.2049	84.6906		55.0245	129.582	35.8322	61.3126	63.7643	53.1794	88.6653	83.1893	107.575	137.807		51.6911	12.5403	67.7451
	112	78.5044	67.198	108.888	86.1306	70.2499	129.475	14.8621	102.789	45.281	105.08	46.9792	130.205	120.889	130.799	132.891		52.399	162.886	72.9282	37.8627	140.564	80.9329	32.254	137.165	177.523	25.2656	112.691	223.234	78.5543	87.7676	170.775	85.3967	85.4031		56.3915	148.978	36.2812	68.6949	66.9187	50.0024	81.0338	74.4017	98.9238	145.692		53.4421	15.5475	59.2824
	114	62.247	77.2157	106.485	83.7631	71.3429	133.062	16.1661	107.701	47.2454	106.878	46.6754	129.421	126.065	115.205	137.926		42.2161	167.032	76.2677	39.7761	138.045	80.0263	28.2178	139.381	163.478	27.0626	115.278	223.759	70.1295	92.5548	156.506	83.7312	88.3266		53.7162	122.775	39.3512	64.5092	65.5927	48.5539	89.6776	96.9193	93.4706	133.109		55.7546	18.0462	60.8967
	116	68.2645	81.4191	106.801	84.3	56.9589	144.787	21.8383	119.024	43.3236	99.8914	50.0299	129.936	127.174	122.296	129.567		41.6697	169.462	70.3222	39.9968	145.969	74.8192	32.5837	125.702	174.305	25.7171	121.134	212.598	67.1504	97.115	178.386	71.2885	87.4886		55.0245	130.614	40.5284	68.4019	60.2839	45.842	89.5729	90.3855	93.3444	149.367		55.003	18.4905	60.8494
	118	62.3401	76.4719	104.864	79.5681	70.5694	127.265	21.0252	124.855	47.806	106.114	48.6305	132.098	134.843	115.096	126.642		44.915	162.087	76.0391	39.6449	136.305	68.8865	28.4566	123.779	166.705	25.0892	103.011	214.725	63.9459	96.4881	173.798	73.0989	73.728		52.082	133.896	32.6904	62.2063	59.5988	50.8186	80.75	85.3453	102.976	143.18		52.0106	11.0187	64.701
	120	65.1386	71.1916	102.693	82.5723	68.5693	135.691	16.8566	110.565	45.3026	99.4208	44.3028	133.226	120.222	126.55	119.32		39.4036	161.229	68.7009	37.2806	128.647	76.6019	29.9052	129.867	172.517	28.9051	107.617	207.026	74.7946	96.2324	166.3	72.9831	82.9983		58.5036	132.79	37.6494	58.1721	61.8809	51.9542	91.3062	93.0588	92.4886	152.113		49.2265	11.1483	56.769
	122	63.1445	70.6962	111.2	85.5574	70.274	137.862	16.598	108.139	47.2128	110.472	45.4104	132.937	125.444	123.772	140.548		40.7551	146.01	71.8155	41.056	126.08	70.4428	28.9201	129.06	156.429	20.627	112.375	213.271	74.1075	97.3648	172.832	76.8869	84.8124		55.5263	130.452	34.235	67.0019	56.4198	44.2974	82.4009	84.1273	98.917	151.486		50.9499	12.0779	61.3076
	124	58.0808	64.5914	122.155	81.179	82.4517	128.417	12.1182	111.493	48.2479	99.5434	38.5822	125.112	116.355	117.02	126.877		38.8748	154.997	75.1882	37.8835	125.135	77.0047	28.8552	132.906	161.783	26.8155	111.837	231.657	61.3415	86.3112	188.332	78.9981	74.2117		56.1084	134.992	32.7564	65.2565	63.0394	53.2297	77.315	86.6987	88.3266	150.155		52.6967	16.7847	64.229
	126	67.7932	70.7082	100.993	84.665	69.6783	152.021	16.4336	101.007	39.2097	98.4415	42.849	120.325	126.065	110.8	129.521		45.9447	171.887	76.3667	36.8865	135.644	75.8785	28.7007	131.92	162.278	26.0957	102.741	212.164	63.858	88.1575	164.956	68.9883	76.1626		51.4051	134.663	32.2642	61.4284	58.8758	47.4194	67.6442	84.1401	99.523	131.711		52.6935	12.846	60.4832
	128	59.7253	72.9587	103.142	74.414	64.1511	132.533	18.3915	102.451	39.6921	98.2516	42.5084	116.435	116.246	124.441	124.426		42.0249	149.947	67.0256	34.814	126.361	64.3623	29.2646	128.081	162.469	20.6701	99.1552	210.394	68.157	92.8067	174.913	73.0745	73.8503		53.9907	141.897	36.902	65.9767	55.6335	47.2671	84.4088	82.871	95.4267	135.526		52.801	16.7944	58.8049
	130	70.8048	67.192	111.665	78.6418	61.7822	135.746	12.3665	108.464	46.5073	97.6082	51.9709	116.918	116.428	121.804	121.73		35.7755	146.722	66.717	33.9998	116.326	68.8985	26.8896	124.245	168.147	26.6279	105.89	197.501	68.9524	89.0697	176.033	67.7634	80.4855		49.9748	131.115	32.2946	62.7361	57.3398	49.3373	82.5723	102.01	91.0296	134.757		55.9892	12.4529	60.3012
	132	68.8745	72.6784	114.343	80.0389	73.4591	136.313	19.0943	101.007	48.2806	99.3186	48.4446	120.214	113.685	120.666	122.02		35.9818	161.498	65.8171	30.6533	128.838	71.6215	23.9025	125.369	154.836	24.644	99.6184	210.969	59.5471	88.216	172.391	65.5632	73.4774		50.4432	127.25	39.5819	61.2373	54.4003	46.5182	89.743	86.7117	85.2938	139.573		50.6416	10.7238	62.6384
	134	64.1394	63.4542	103.246	78.4607	65.1857	131.37	15.3799	110.337	42.3436	105.617	46.7133	110.529	124.403	115.809	127.516		39.1155	146.256	69.1321	35.6313	117.635	74.727	26.6526	127.524	159.437	23.7467	99.2777	194.695	65.8703	80.1457	167.359	75.1574	81.71		46.8164	136.037	39.6974	57.4479	59.3461	43.6068	65.28	72.6419	97.196	143.374		48.2844	12.931	64.7938
	136	61.1041	73.7647	106.464	73.4896	68.5274	124.155	12.8226	101.638	42.6201	98.9919	42.9396	111.15	113.382	126.535	129.628		36.2399	155.547	68.1272	36.8554	124.855	75.3852	28.019	121.99	151.921	19.6802	98.4212	200.255	68.9823	85.4931	173.482	73.1233	75.7983		50.0629	132.06	35.3276	60.8323	52.5827	45.3457	71.2582	71.3187	85.2232	125.188		50.9693	16.9112	59.7526
	138	64.8031	65.1386	105.108	79.5116	60.711	149.425	13.965	110.75	46.4044	94.7907	42.3914	121.744	113.44	116.136	125.565		34.6704	132.899	66.3258	30.7892	114.93	60.8786	28.7904	111.129	148.606	26.1794	98.5569	217.475	64.1218	81.8873	156.242	66.5391	76.0329		47.6099	122.692	35.2145	54.1365	51.5547	39.8969	76.002	82.2359	102.058	121.536		50.0358	12.3063	61.3381
	140	59.0821	56.675	99.9392	82.2613	66.5865	138.831	15.0019	111.35	39.7289	94.7172	47.3487	120.711	110.693	114.698	124.163		32.9089	157.459	68.1093	35.4305	120.436	65.8171	22.6983	118.973	158.459	23.9609	102.548	207.89	67.543	84.2424	168.262	73.8565	69.3781		52.4546	121.908	35.8477	54.6531	54.3161	41.8764	63.2146	87.048	94.0498	128.861		48.484	12.3318	59.9375
	142	53.6938	76.5152	101.934	82.5088	68.4916	130.205	14.1924	107.448	35.4511	95.3261	43.6121	117.481	122.237	110.8	131.332		33.7546	148.425	73.9911	37.5351	117.65	65.1209	29.0199	116.479	144.974	21.275	91.0033	194.325	60.9653	95.2458	151.036	62.9986	69.0123		53.8786	119.43	32.5634	51.2887	58.0922	44.2009	78.8855	78.3296	90.5628	128.807		56.8403	10.7424	62.0485
	144	51.5547	64.2215	99.7753	73.8932	64.5268	141.736	14.3085	97.007	38.1283	86.6793	44.1152	121.707	110.515	115.118	133.53		34.4756	142.397	65.5514	36.9539	112.102	65.1975	26.2729	108.358	171.348	19.3513	101.542	216.919	60.9537	96.8856	166.873	69.8286	70.9679		51.5103	118.046	35.4768	51.7821	58.3607	49.9859	59.7944	93.4507	92.7802	140.34		50.2918	14.2201	59.8753
	146	55.2386	81.1916	106.275	72.9709	68.7608	127.677	11.6225	100.822	43.9491	91.5765	33.9538	124.388	101.405	118.325	131.231		30.5226	146.96	66.4324	38.1283	118.619	66.5687	25.5108	123.022	149.881	23.2849	95.1386	206.297	63.735	94.4433	172.832	60.6128	71.7367		53.5595	120.548	33.1327	51.394	56.1876	42.6041	72.1312	82.3184	93.258	137.34		45.9493	10.7384	56.7507
	148	61.2315	66.089	98.3737	69.9369	60.0707	128.547	15.4967	105.848	45.2756	99.3663	38.1804	115.292	110.287	111.229	125.354		37.3014	151.119	65.8998	31.5052	111.866	68.6052	26.2582	116.91	156.744	20.5024	97.4392	208.614	53.5036	73.985	164.343	74.4569	74.2362		47.8441	123.479	30.3718	59.0706	56.3065	42.4073	68.8925	78.7917	84.7291	116.253		51.2312	7.8336	59.6534
	150	57.0668	67.7455	100.383	71.1433	67.9243	128.67	18.9326	96.4073	38.9533	87.9755	39.9075	112.777	111.479	108.556	120.103		36.1366	140.524	69.6964	29.5946	117.804	72.1858	27.6617	109.398	140.292	19.1466	94.6905	192.677	52.5437	71.9551	168.582	70.0452	78.9293		46.8706	116.501	30.2965	51.7488	52.8948	40.223	74.0217	64.4328	84.697	136.463		48.5224	11.8632	60.0031
	152	55.8934	55.2837	98.9851	78.1675	60.3704	130.082	13.673	102.865	37.9044	90.4708	42.1152	123.734	112.885	100.39	119.268		36.054	149.003	70.2198	32.975	119.01	72.3317	24.3754	119.822	146.928	17.71	96.4073	216.468	57.465	69.8166	161.342	72.849	69.5161		45.2649	128.716	30.6483	55.9387	59.1108	46.2853	78.773	73.3369	85.4224	154.583		50.9515	18.5197	56.754
	154	59.3116	65.8644	103.516	73.2637	66.3495	141.181	14.262	105.289	40.5073	89.671	51.5159	109.725	114.77	113.815	113.851		36.1056	140.989	62.6137	28.3024	112.145	66.7763	27.3446	112.346	148.384	19.0515	96.8788	197.875	55.8482	77.8747	170.981	67.543	68.8146		49.6394	120.444	35.6725	60.8439	51.2777	46.773	72.7211	74.1933	99.2981	133.662		43.7765	10.2429	56.4044
	156	61.0174	69.7565	95.0851	69.1621	57.6359	130.12	10.0335	101.721	45.3026	93.4706	40.6127	110.408	118.252	108.294	130.151		36.5552	142.461	65.2565	29.8901	122.737	67.6204	24.4486	114.77	145.953	20.5743	89.0828	191.087	56.7942	83.7184	153.202	71.2098	72.8855		45.4751	115.184	32.1628	56.1593	54.215	45.8042	74.4508	77.0667	95.0181	123.787		47.132	12.0095	54.5412
	158	60.0995	62.2238	92.2768	75.1512	67.8289	127.966	10.0335	104.731	44.9312	95.3194	43.7297	114.85	120.681	113.801	128.616		30.8194	137.49	67.2753	31.9855	106.464	65.8939	23.0375	113.663	148.879	17.7147	102.631	195.201	56.6637	88.3722	177.835	67.823	73.9177		55.5206	129.567	28.2129	51.3164	54.1421	42.3754	69.6062	72.9038	93.4108	125.52		51.2166	5.54671	55.3933
	160	56.3915	69.2221	102.817	73.166	56.851	132.945	11.3751	107.687	37.0109	81.1538	48.6852	109.207	119.977	109.42	116.691		33.0869	140.724	68.3661	29.4646	115.416	63.858	22.3355	117.503	153.337	19.6564	95.601	191.116	62.7128	94.5168	158.887	61.672	72.2891		45.8312	115.772	33.9742	52.182	51.6157	36.4724	64.3565	76.4285	87.4367	124.388		51.3752	13.344	56.2538
	162	57.2943	62.4973	100.644	79.1984	63.7409	133.576	15.0672	102.217	41.9719	95.5205	47.6153	123.531	105.387	107.061	121.261		34.5371	139.948	72.0401	36.5966	117.1	66.3258	21.2702	102.403	142.05	16.8378	94.8777	191.867	65.4628	75.059	160.875	64.9914	76.8807		44.7215	126.368	33.2091	47.8169	52.2321	43.58	68.6171	76.7443	90.5365	120.696		49.366	11.0641	55.8355
	164	56.0688	70.1295	99.8777	67.9899	64.1159	126.414	12.8872	98.8967	39.2674	88.19	36.1211	113.332	107.335	112.432	119.201		32.9241	147.988	71.949	29.2846	108.64	69.4381	22.9647	117.027	148.483	19.6802	85.4995	194.072	61.6604	67.9959	173.076	65.28	66.8831		47.1856	124.095	37.4208	57.8981	54.8106	45.9987	87.5924	81.0969	76.639	120.733		48.783	15.773	57.2621
	166	52.5994	68.7787	98.8967	76.0699	59.9901	126.421	12.3343	96.5487	41.9719	82.8202	44.1098	116.013	110.287	116.202	118.575		34.2401	135.235	69.0243	25.8153	110.693	64.7972	23.1345	116.166	170.963	15.0905	92.8597	184.145	57.8924	90.7731	155.886	60.405	74.4017		50.5039	114.118	33.7036	44.6624	52.3711	39.7814	69.8226	71.6033	80.7059	129.928		43.589	13.9868	56.9382
	168	63.9166	67.7932	97.1757	69.6904	52.1709	106.051	15.3192	102.568	39.4193	85.802	39.2097	109.356	112.497	101.103	121.209		33.4944	135.125	63.0919	26.9835	120.451	65.3508	20.2966	113.916	151.996	21.1981	90.1362	191.626	56.9475	88.0795	173.41	78.9293	74.5919		49.8428	118.87	28.5761	51.7044	41.9984	39.6082	68.9404	70.8411	91.3787	141.053		48.9446	12.6238	49.9731
	170	49.513	62.1191	96.2862	86.7892	57.1293	130.59	14.0346	93.6835	38.9219	89.5991	41.2304	106.275	101.694	107.941	123.629		31.8742	138.076	64.3976	31.4446	111.221	57.4764	23.1248	109.533	145.275	17.7572	90.7468	191.636	67.0494	74.6963	157.852	60.4858	68.9524		44.2653	117.401	28.5911	53.4589	50.8849	46.2853	66.0062	73.2514	85.8728	125.188		50.5271	16.2412	62.3611
	172	52.1264	65.5573	98.2177	70.0452	53.6379	134.78	10.1472	98.5433	45.1895	89.8413	42.3329	103.121	107.223	114.973	110.586		33.6321	140.132	62.2238	34.0867	106.633	59.1682	21.8576	104.933	147.133	20.6653	90.3395	188.666	60.9769	75.0098	166.001	68.7428	71.4458		46.3828	120.934	29.3146	49.0137	53.4812	44.6463	70.3343	73.0074	81.3369	125.293		41.2866	12.9741	56.9731
	174	58.4808	60.5666	93.3311	72.3499	61.9506	125.626	11.8794	96.8182	39.1731	89.4813	36.9331	109.469	107.546	110.986	111.243		36.1366	128.731	63.0686	28.965	112.246	60.8843	21.2991	111.221	146.043	17.2239	98.3397	193.898	59.0993	78.2486	150.088	75.5516	66.1423		44.0723	115.431	27.2208	43.992	50.4322	40.7498	73.8687	64.0455	90.5956	123.892		45.8719	9.84951	53.0944
	176	53.5036	61.5444	105.478	66.9128	61.3763	128.807	10.4842	93.4507	37.1457	91.9991	44.2385	117.892	112.799	115.38	118.848		29.5846	127.486	60.9653	28.1284	109.896	64.1687	19.6755	115.394	141.994	17.271	92.1049	206.895	55.6957	73.6852	165.122	62.2819	66.4502		44.4047	115.838	23.6591	47.4575	44.7699	36.6018	74.5674	68.8446	88.06	121.447		40.7479	12.5269	53.5712
	178	54.0356	61.4516	98.2719	70.6901	60.1917	137.854	11.6133	104.738	38.2482	82.5279	39.8812	105.687	107.772	111.558	116.239		32.8377	138.776	59.4954	29.9002	107.969	66.6754	21.1837	111.823	143.285	16.4852	94.3566	182.835	58.0522	80.5673	163.993	68.4736	72.1433		48.3954	117.452	28.7455	47.9586	43.7993	38.3838	71.1312	69.7144	87.2099	116.158		46.9733	10.7744	55.6853
	180	61.2315	55.803	90.0706	88.3787	64.5855	112.986	13.6684	95.1587	45.5937	99.0055	36.3587	106.745	105.373	109.398	115.634		30.3718	134.874	69.0422	24.1217	116.363	60.8439	23.5959	109.803	143.067	11.5538	104.057	175.032	57.1578	79.543	168.493	61.9913	63.5829		46.5182	112.677	33.1633	49.1508	51.4438	40.4388	80.196	65.1622	70.5574	123.104		49.5232	9.42906	54.4295
	182	49.2879	49.7383	90.0509	72.5871	51.6933	142.808	8.80475	92.6078	40.0336	85.7891	42.0302	107.124	108.132	108.846	121.03		33.1633	133.99	62.9285	26.1695	108.931	64.5385	23.1684	109.398	150.969	15.3846	96.0508	188.98	61.3821	84.7932	172.175	72.2831	62.5205		38.6344	115.583	29.0199	53.3638	50.3274	37.972	78.261	66.2133	90.6219	123.486		46.829	10.086	52.8254
	184	60.8034	71.3611	97.0812	77.489	63.0336	130.644	10.0471	91.6029	37.639	90.9112	39.7499	110.515	105.415	110.95	118.134		32.396	131.471	63.7994	25.4225	107.772	61.8461	20.7708	111.429	145.414	15.1838	99.7003	193.723	59.0706	77.3212	165.561	62.1307	64.809		47.6099	112.518	31.9147	47.7733	42.849	40.4441	63.8053	79.7751	92.9858	116.749		41.9335	5.61688	57.2804
	186	51.3054	61.2604	108.139	71.5609	53.5819	113.902	8.79119	98.6656	40.123	83.8014	36.6845	113.996	115.663	107.807	111.179		33.678	137.886	67.3585	26.3468	115.998	69.5822	16.8283	105.561	137.688	16.692	85.6604	174.832	72.9038	79.8881	154.946	62.3867	73.1416		46.2853	122.663	29.2046	52.2154	51.0176	42.6839	75.3421	69.7745	78.6605	122.14		39.4417	9.12984	48.9702
	188	58.2578	64.3623	95.856	74.0646	61.7764	109.704	15.5014	98.7811	42.1842	92.9659	45.2379	110.408	111.636	106.78	124.26		30.5477	133.202	61.4342	23.9658	97.4189	70.1415	21.9686	106.303	144.738	14.4433	85.4095	179.04	54.288	74.8745	159.72	71.8337	70.6841		46.1988	118.936	26.4996	49.9583	49.4087	42.5562	74.0769	73.2453	91.3787	114.372		41.0734	7.24826	55.1545
	190	50.6419	55.6335	92.1511	72.2527	58.0408	127.982	11.8151	95.8292	37.9825	81.995	34.9936	96.5891	114.843	112.439	113.671		29.8751	135.235	63.9107	25.5845	104.453	59.0649	21.0732	103.488	137.918	15.7071	86.3371	182.452	64.8266	77.9681	158.596	59.8749	69.5282		44.1152	122.349	22.6886	50.388	51.4272	33.9282	66.2607	76.67	84.0889	113.216		44.8751	8.57233	53.8984
	192	51.6989	71.0042	108.308	72.6237	67.085	133.155	11.5858	94.8375	31.7275	89.6056	42.2692	107.3	108.527	117.349	108.796		29.0498	147.906	61.3357	22.863	110.059	56.148	25.2215	116.749	145.121	17.3984	83.2084	180.092	57.0725	65.4569	158.887	63.6882	68.9164		38.4725	111.357	32.8326	51.2611	42.8543	40.5126	77.0791	67.2039	83.4505	127.875		48.3004	8.93282	58.3802
	194	59.3978	71.107	82.7566	68.4975	63.5302	126.186	12.0815	89.2264	44.0777	82.2169	38.6501	104.899	120.014	104.432	113.829		32.102	142.219	67.2217	27.9594	117.745	61.4516	20.1578	102.1	142.695	14.341	93.3576	185.038	62.9344	77.5947	152.498	59.0362	72.8794		41.9825	111.2	33.0157	48.9863	45.9393	35.8065	74.1504	79.117	85.1397	118.715		53.3882	7.02036	60.5473
	196	52.5827	73.4529	97.1015	71.6518	57.1293	132.052	10.0562	98.4687	39.016	86.1177	41.4261	107.251	113.461	106.205	119.032		25.2999	136.96	63.0161	29.2146	111.529	63.7058	19.4275	109.363	139.908	11.8014	84.6073	189.295	57.8069	67.6442	153.959	64.3623	62.4856		41.9666	112.971	27.4882	48.5539	54.9344	43.9277	66.1778	68.3481	82.3057	128.555		51.2635	7.28626	56.6529
	198	53.6435	62.9752	99.2164	66.4206	58.5666	135.243	12.2148	96.0105	39.9495	87.5794	40.2387	100.418	114.458	112.289	113.959		26.7957	129.083	64.9796	24.517	104.787	63.1678	21.6649	107.553	136.266	10.6028	88.561	174.351	62.5497	70.2017	154.743	56.9305	70.4307		44.1741	116.852	30.402	43.5854	46.0149	37.1976	64.8619	72.916	91.8802	116.443		44.8578	4.18203	56.7905
	200	57.9609	53.9963	101.831	61.0058	57.4536	129.997	6.59322	93.9099	38.7598	92.535	38.1857	105.191	106.114	105.722	112.907		34.4807	134.859	64.7501	25.8203	103.904	61.7358	19.499	102.169	138.943	14.5874	93.8633	190.857	63.9752	74.0034	162.608	68.378	63.4717		40.7287	114.01	28.0588	46.2042	48.7125	42.9503	64.2274	74.0646	83.9931	129.621		52.0642	7.22991	51.9506
	202	52.4658	59.5759	96.2593	74.8438	55.8426	130.814	8.48859	98.5501	34.1583	82.1788	38.3786	112.389	95.2123	117.137	123.082		29.4896	135.644	63.3606	24.4144	97.3175	58.1778	22.8581	102.769	135.392	11.0503	85.1525	181.307	59.1223	70.9015	151.937	56.148	66.5509		46.7025	118.966	32.6802	49.4196	50.7357	38.5822	76.3729	74.1136	82.1661	121.886		47.3623	7.42263	55.7216
	204	51.9542	61.5792	104.606	59.6333	57.9837	115.67	8.5247	92.2371	40.0021	79.7688	44.9957	106.387	107.138	112.31	111.572		31.9299	127.402	59.1337	19.6039	105.596	58.3264	21.0732	98.9579	149.475	12.408	94.8843	197.108	55.1935	77.8996	153.421	60.6301	61.6778		43.3717	127.006	30.3718	43.7993	41.2674	37.6858	67.5728	57.6701	89.8347	125.883		52.0626	10.0926	57.743
	206	52.9004	52.9617	98.6316	74.3465	63.6706	123.922	11.1372	99.748	42.5084	77.9681	35.4099	98.7947	108.902	109.42	113.332		25.4029	127.837	60.6821	24.9766	114.386	58.4293	15.422	108.556	132.044	11.8886	91.3128	172.877	63.8053	74.7516	149.806	61.2141	76.67		50.2337	123.576	27.3892	44.1527	44.3243	40.829	59.9325	69.9008	80.4666	126.528		48.2621	6.31477	62.7048
	208	54.2768	69.8406	95.601	73.1965	62.2179	133.678	11.4713	91.1284	40.2861	85.3324	38.4517	109.867	109.143	109.491	121.238		27.6915	133.296	57.539	25.0353	99.8504	56.3235	16.8801	109.349	138.537	15.6604	91.3458	177.029	57.3682	73.1904	160.211	70.5936	72.2041		43.2596	117.064	24.4339	41.4896	46.0419	36.2141	70.4971	67.8528	84.7611	129.621		46.7561	9.55232	56.0007
	210	48.948	65.2624	94.0631	72.4837	62.1656	113.353	10.2747	86.9315	37.1301	88.8087	43.9545	109.633	105.163	111.393	108.464		24.8885	141.873	60.8208	25.4225	104.801	65.2211	15.3566	98.1838	132.401	14.8947	91.1086	186.851	62.1889	66.5924	152.783	60.0419	68.5215		42.5775	125.044	24.6098	43.0995	44.6893	39.3093	69.1022	72.3317	86.2983	111.909		45.0779	11.2646	59.6736
	212	58.1835	67.5132	106.661	69.967	61.162	138.203	12.5323	98.5841	36.338	78.3858	38.4725	108.853	112.253	108.747	116.749		28.7156	133.6	58.8528	17.606	104.342	62.2238	19.4275	124.29	138.593	14.8854	93.81	194.014	57.1464	83.2466	144.616	56.9475	62.8819		38.2065	113.123	30.5779	45.5829	46.4261	35.9612	68.0735	66.2784	79.1107	129.114		39.1385	7.53415	58.4721
	214	45.9014	58.6639	93.6635	68.1749	55.9217	114.872	9.28898	86.9121	39.981	86.9251	38.7232	106.829	108.938	107.307	117.349		28.2129	132.782	57.4764	23.9171	102.493	58.4464	18.6334	105.108	139.134	13.8583	92.0982	182.769	57.4365	69.0902	163.26	58.1778	66.3021		38.5769	113.981	32.9547	45.9609	44.2814	37.3741	72.1858	68.5753	77.8311	126.862		49.8525	8.47737	54.2474
	216	55.1034	56.868	98.1363	69.2401	53.3806	130.236	10.3157	94.3299	39.2831	87.3913	46.0149	112.217	103.967	102.969	112.677		32.853	124.976	66.3317	24.7222	102.499	68.378	17.8045	91.7415	147.026	14.7317	91.0165	188.647	53.761	75.6564	142.38	59.8001	63.6882		37.182	112.698	29.4596	46.3557	43.3343	40.3493	66.9009	71.6518	78.9168	133.07		47.9782	7.58796	54.1753
	218	52.527	53.2465	98.0618	75.4222	64.6149	132.821	9.5565	106.121	38.3682	83.2848	37.265	107.687	118.325	103.981	116.042		27.5873	133.171	68.4617	21.5878	109.619	61.701	21.227	104.404	151.595	12.1734	88.8413	192.175	60.0073	67.817	161.454	55.3457	64.8266		38.6448	123.464	24.8004	47.1965	47.1421	43.1902	63.9576	76.9241	82.3247	123.937		48.3148	7.18667	59.0746
	220	55.9161	61.0694	106.759	67.5192	57.6416	119.489	11.7647	92.6542	38.2013	88.6979	37.2131	102.707	103.939	109.03	111.472		28.2477	132.93	60.8323	19.1276	104.676	59.0821	14.7736	102.879	143.828	15.5435	90.6219	171.366	55.707	80.1269	142.752	63.9049	62.7478		47.6426	121.082	30.3166	44.0188	47.6752	38.9951	75.0651	64.0514	87.0869	115.431		46.1404	8.43386	59.0461
	222	58.0693	65.4393	93.8433	65.1151	55.803	122.423	13.0995	95.5406	34.7575	84.9407	41.8499	103.087	104.189	109.853	106.773		31.682	132.215	61.1389	24.7955	99.2913	56.1876	17.7289	105.645	139.796	15.3379	88.6327	196.226	66.0654	82.1598	147.774	56.692	58.7726		42.6839	117.745	27.885	49.3099	46.9737	34.9731	65.9353	66.0476	75.9155	113.721		51.7916	5.04583	56.0768
	224	56.5616	69.2821	105.582	70.672	56.4879	123.441	12.0309	92.5085	38.1492	87.6897	42.2214	112.597	109.484	110.622	111.271		24.7858	127.989	58.6982	21.6263	109.257	58.6925	20.0622	99.0123	146.035	17.2427	87.6508	187.629	65.2447	77.1102	146.624	66.9306	67.5251		40.7076	111.114	27.8155	44.8559	41.7704	38.948	76.2183	64.6208	83.9803	115.852		47.0479	8.25991	57.6764
	226	45.4858	54.5463	100.178	71.2824	59.3059	126.141	7.32317	89.3702	36.9383	86.1693	38.144	102.727	100.069	104.676	112.806		30.0456	130.614	50.791	25.0011	101.914	65.1916	13.8351	96.7036	137.498	14.3224	91.7217	188.494	54.4789	73.0745	153.37	58.9846	71.464		42.7319	120.548	32.1121	46.3232	39.2464	37.8263	74.7516	72.3621	78.6168	112.188		46.4457	12.0054	56.6579
	228	58.155	66.0181	102.045	70.4307	58.6467	133.124	9.40229	98.177	35.2505	84.2872	43.0142	103.606	118.244	102.196	109.193		32.6802	123.772	65.7698	22.2196	97.8653	57.9324	17.1956	97.277	132.285	14.0206	86.7892	201.069	52.1542	85.6539	147.396	62.6487	65.5159		41.4367	118.524	31.5506	45.7934	43.992	38.0554	71.3974	62.5497	87.8196	112.145		43.8969	4.9642	52.0041
	230	54.5182	55.1315	100.822	67.3645	55.803	118.244	11.7142	88.2421	39.0684	85.371	36.2709	103.661	102.803	111.851	117.745		26.0957	121.052	54.7206	21.93	104.085	54.9682	15.6791	107.568	130.644	15.1232	92.2107	184.793	59.5012	62.3983	165	55.5037	58.7612		42.2107	115.714	26.1941	40.5231	46.2042	38.2795	73.5813	66.5035	95.1922	123.802		45.5549	8.18748	54.1114
	232	51.2998	64.2391	87.7676	55.8087	54.7994	121.209	12.6382	91.5304	40.5547	94.3966	33.4332	104.627	108.358	114.401	110.729		30.3015	126.277	54.9119	17.7619	104.919	57.2488	16.4101	98.9443	128.785	14.6945	82.5469	174.405	58.5265	77.8187	165.368	59.6333	60.5724		40.6654	105.876	28.8901	47.8714	46.0852	36.0902	66.8	68.1451	85.281	122.588		47.3591	6.00588	48.2781
	234	46.3936	57.7385	92.3628	73.569	63.425	127.433	12.629	89.3636	35.4357	91.9793	37.5351	110.75	101.247	103.301	112.828		32.4163	131.44	62.2703	19.685	98.2177	53.5428	15.5622	95.7419	141.865	15.3939	82.1598	180.871	63.2847	77.104	148.912	64.0807	71.9733		44.786	121.194	28.8852	44.276	36.4311	33.0869	67.0197	73.2209	88.0925	126.475		44.5234	6.55883	52.3794
	236	58.8872	61.759	85.7119	75.4776	56.1027	127.661	13.1272	93.6635	35.1015	81.0843	36.928	102.251	112.504	102.251	109.306		30.6785	126.255	55.0583	23.9122	100.24	61.3531	21.3712	112.016	126.042	13.8676	92.9526	183.639	54.4789	79.9007	147.84	54.2712	65.3036		37.9304	113.411	28.5761	45.9663	45.5506	39.6606	74.8069	67.2931	82.7757	120.555		48.7126	8.47868	54.3032
	238	53.9067	63.8814	103.578	65.8407	51.25	119.024	8.42993	89.7038	40.0914	88.0665	33.3415	98.3126	99.8777	103.405	111.93		21.7227	129.567	68.0675	26.1843	106.506	56.7828	16.0771	103.703	125.618	11.985	87.3136	185.207	58.4293	73.4468	149.856	66.3199	61.1215		34.6755	106.394	27.9446	48.8001	45.6908	32.9394	66.9781	80.624	82.6168	119.083		45.8183	7.00465	58.5624
	240	47.915	63.3431	104.196	64.0866	52.8837	125.308	10.8173	97.25	39.2988	82.0077	38.1961	100.541	102.058	106.885	115.998		27.1615	125.823	65.2388	23.4161	101.453	63.3548	18.0268	97.277	132.37	12.1458	90.2345	187.268	60.0131	75.3852	145.626	55.6505	65.1209		40.6075	117.628	31.6113	43.9599	44.6678	38.1596	65.7757	67.7693	88.8609	121.67		46.1546	9.43171	52.6446
	242	60.1802	58.3207	97.9602	67.2871	57.3739	125.24	9.13951	97.1555	38.0033	85.6861	40.2756	100.418	98.3262	113.642	110.33		26.5243	133.062	54.8444	17.8423	100.623	64.3565	18.8423	105.45	135.07	11.4988	92.7934	187.762	64.4857	68.5514	140.909	53.3862	66.6517		42.4499	108.662	29.2446	43.8635	46.0311	41.3415	54.9119	71.0526	79.2109	104.648		39.9878	6.87381	53.6481
	244	52.2654	47.9805	85.2296	66.7407	58.9331	117.305	6.86608	93.2713	40.1651	86.5437	38.3056	99.2845	105.38	116.377	107.878		30.8698	123.389	62.8644	22.5483	97.9872	60.3762	15.3332	95.8225	129.836	13.9603	87.3589	179.086	55.8595	78.6418	136.021	53.7218	67.674		39.3931	115.009	24.1217	50.6363	48.3517	38.8382	63.2788	63.7585	85.8535	109.995		43.2768	3.4248	55.2681
	246	52.9506	48.7344	91.6029	78.0304	58.0636	118.855	10.4068	90.4117	43.1742	90.7402	44.6356	101.914	112.583	105.247	112.705		22.5338	124.283	65.7049	22.1326	103.447	62.2994	18.1546	106.836	140.981	14.3828	86.2983	168.804	57.8069	66.6814	155.403	58.9216	72.3378		39.7131	113.663	30.3869	43.5587	45.4104	42.535	67.7991	76.5647	85.4867	123.847		48.085	5.86919	53.81
	248	50.3164	66.3436	93.1584	70.4126	57.2374	118.803	10.4979	86.8863	35.8065	80.5673	40.1756	93.4108	109.129	97.3446	113.202		28.1631	133.959	63.4366	23.3723	106.963	60.1686	17.8187	98.1228	127.593	13.7425	90.2542	183.639	57.6986	65.3508	144.461	60.9769	63.3081		41.6061	115.147	25.8596	46.0257	38.9794	37.639	53.9291	70.2801	90.228	122.087		42.6041	5.11842	54.313
	250	53.3582	57.6986	95.3328	57.5049	55.4755	118.002	7.44434	91.5567	39.4036	81.0465	37.7847	111.279	103.495	101.57	116.837		27.8602	120.192	65.575	22.989	94.978	59.3289	14.9786	110.993	138.561	12.0585	87.1192	182.499	62.2703	76.1997	145.055	54.1197	64.6267		43.1742	113.396	23.844	40.0757	46.6537	37.3844	62.8002	77.2405	81.2359	108.612		46.2574	9.18806	53.4242
	252	50.2172	53.9627	92.052	67.7991	61.7996	131.541	9.34336	92.3959	36.519	81.4317	38.3577	94.0898	106.633	103.842	122.207		26.9637	127.417	63.2263	26.3025	89.3636	50.0134	15.7633	97.1487	136.715	17.6391	84.1081	188.971	59.2542	70.5936	150.138	60.0534	69.9008		37.8575	107.033	29.7248	42.6627	43.8153	38.1857	71.1251	71.1191	82.7057	128.356		40.3537	1.99943	52.5714
	254	47.3704	63.5361	92.6211	75.5392	54.9513	118.759	10.0335	88.6066	42.8277	82.0267	35.5643	101.35	104.474	108.068	116.596		20.3396	131.595	65.0385	20.3492	103.412	60.4685	19.5419	101.37	131.208	10.2519	87.4043	174.414	69.5762	68.8386	144.876	50.5756	55.7917		43.9599	113.627	30.4924	43.5212	48.9918	38.8539	61.7996	66.5806	85.1268	122.073		43.0788	5.84707	50.2902
	256	52.3711	56.7488	110.522	69.5882	53.2241	120.919	8.77763	87.2682	35.9818	84.3832	35.5334	98.4958	97.9534	113.952	117.547		24.6244	120.77	57.6701	20.2631	101.776	56.4595	15.6744	107.166	130.236	12.3435	87.8391	159.248	53.0622	76.8187	142.51	59.5126	66.2015		42.8171	119.548	30.3015	47.9914	44.1956	38.1231	59.2428	66.6339	76.002	115.831		45.1958	6.63328	54.3787
	258	44.8182	60.919	90.392	65.0974	50.0905	118.178	10.6074	89.3506	35.4151	82.0457	40.4388	99.0939	102.382	108.81	113.216		30.8345	126.383	57.3227	24.6929	95.8359	57.5675	17.918	115.147	136.344	10.6575	90.2214	178.92	61.7938	86.3758	143.31	58.6868	68.0735		42.5243	112.389	28.0538	42.6414	38.4621	35.3791	70.3704	60.763	78.5356	119.711		48.2605	6.24826	54.3639
	260	56.3802	65.3331	86.1564	68.3601	60.5897	105.953	9.68812	95.9433	34.3322	83.7759	38.5874	107.131	107.589	104.537	114.27		24.6049	127.189	58.9044	19.938	96.8721	55.7578	20.4354	96.9665	133.405	12.4356	88.5154	167.828	59.5471	78.8417	127.478	51.66	56.3292		39.3355	117.152	27.1664	42.7425	47.6426	38.0658	65.0856	61.4516	83.1383	116.195		39.9985	4.06207	46.1072
	262	54.7431	51.2611	97.2297	66.7348	59.7023	127.219	6.38771	91.2535	36.9798	80.6681	37.5819	108.987	107.202	113.461	115.816		23.2704	128.196	62.4216	19.0705	100.103	59.7829	19.5944	101.487	136.976	16.3444	89.7692	179.326	49.8373	72.8429	154.574	54.7825	69.5161		37.2547	107.849	23.5813	44.6732	43.3877	38.2065	59.5931	75.2189	74.5981	124.848		46.0614	7.49084	55.5302
	264	49.2769	58.7898	97.7164	74.8684	64.2802	120.511	8.39835	97.7029	35.4562	83.9867	42.3542	104.251	100.315	111.243	121.588		25.9579	129.69	55.3175	20.0766	100.322	53.3694	13.5989	99.6457	128.509	12.2515	85.2553	167.474	51.2002	76.3543	133.428	55.295	72.4107		43.703	111.701	24.1851	49.1124	44.743	36.9176	56.4312	57.7556	85.1397	118.855		44.8798	6.58887	49.2137
	266	47.5772	59.26	95.4133	58.9674	52.399	117.152	11.4942	94.3099	42.1099	83.4633	45.7556	108.132	109.938	101.302	118.605		25.5992	129.49	62.841	23.3966	101.783	52.4602	17.71	94.6838	140.965	15.7399	90.4511	189.525	54.1589	66.1719	166.388	51.7877	63.6999		35.3122	110.893	26.4405	37.0109	40.734	34.3067	71.1372	60.9422	88.7109	116.669		39.7867	7.37148	56.0487
	268	52.8	58.2007	83.5143	67.6323	55.7296	112.03	7.90727	97.8789	38.7493	77.6693	41.9241	100.52	103.287	104.363	112.418		29.2946	121.521	60.8323	23.8781	100.671	57.6245	13.8583	103.052	136.471	14.3828	85.7956	186	50.6087	77.3958	138.664	56.3858	60.3185		35.2145	109.874	29.3345	38.5247	43.8742	34.655	60.0822	65.7875	88.19	117.62		43.0944	2.05558	56.0338
	270	51.932	62.1249	101.439	69.8406	56.7544	118.737	8.87708	89.2199	36.1005	77.8996	34.9885	101	104.043	96.9395	113.411		26.5539	130.891	61.3183	26.9637	96.6564	61.9506	13.2473	97.0272	127.113	15.3426	85.6089	177.964	57.6473	75.3298	148.904	49.7493	64.5503		44.8774	115.423	25.3489	42.8277	42.5562	32.1983	66.3021	64.609	75.9526	122.513		47.0955	3.72065	53.3915
	272	60.457	61.9157	95.9165	57.9723	59.4667	123.022	9.66088	91.9132	32.4924	83.0365	34.5986	101.357	110.017	96.5083	112.842		24.4193	119.017	60.4166	19.3561	101.309	58.1778	17.606	90.4314	131.881	12.385	88.6848	173.094	56.2669	83.4123	142.841	56.7147	69.6122		35.8013	108.407	22.1133	42.3542	41.728	36.7363	67.0494	67.5132	81.3433	117.818		38.1555	2.68841	53.5876
	274	48.8001	65.9885	95.353	82.1978	56.6013	120.385	5.19017	96.5756	40.8818	80.7122	34.5371	102.106	103.073	113.18	108.068		29.6047	116.093	61.8925	21.1212	96.0105	57.1748	14.946	103.981	135.298	13.2889	85.802	174.732	61.0116	77.2964	155.954	57.0895	62.7886		35.1374	112.325	24.7662	41.9719	43.4625	37.7587	60.2954	65.062	67.6621	116.691		43.9047	6.74959	50.4271
	276	54.187	68.9643	92.2636	70.0512	64.4387	126.133	8.92683	86.6664	36.338	81.0528	33.6474	98.9715	100.048	104.864	113.685		26.2926	123.434	58.5494	24.2778	105.988	57.4308	15.7399	98.4347	131.595	11.3247	80.9077	183.293	62.154	80.196	136.936	58.2292	66.8534		40.7604	113.923	30.9604	42.1523	43.0729	37.0731	48.7454	66.7288	72.2405	128.792		43.333	7.82834	53.8117
	278	41.9241	67.2098	94.7239	66.9662	54.7037	114.278	10.4204	77.5574	36.1056	82.782	43.0995	106.415	96.5554	103.364	119.342		28.606	129.175	63.4717	19.4752	99.6389	56.4765	21.275	91.6689	130.151	13.9743	94.45	167.385	54.507	67.549	140.252	58.5437	67.5192		42.0992	112.174	30.397	43.2276	46.0906	34.7114	62.841	71.24	81.7037	116.976		40.1491	9.22909	55.0211
	280	51.8432	61.2604	83.6738	58.1093	56.7261	121.558	10.425	85.1589	32.1679	88.4568	33.0004	102.81	102.403	107.152	116.932		28.029	129.574	60.6994	21.227	98.6724	50.8352	16.1849	98.686	124.999	14.2295	87.521	184.211	69.0602	72.9526	137.031	51.527	71.4458		34.3169	107.589	25.1333	40.323	43.1529	33.3874	67.6502	65.2859	81.0212	123.179		43.3111	6.15831	50.4739
	282	48.8713	70.2981	92.9791	67.5132	58.744	119.866	10.9086	86.4597	39.0056	86.1371	37.7587	106.282	97.2095	101.707	113.497		22.4274	117.393	60.33	21.0012	99.8504	52.7833	16.946	100.739	130.536	12.8457	80.4288	182.396	53.873	64.7913	146.256	55.295	54.3217		42.2001	109.498	28.9999	43.564	43.6549	32.792	60.8554	76.0576	83.9419	111.379		43.6468	2.41329	55.928
	284	55.5601	66.4206	96.9058	62.9169	63.2087	120.993	8.67371	91.5501	33.5964	77.6569	40.8026	105.359	101.391	102.1	123.899		26.8797	122.805	70.4066	24.307	104.78	62.3925	19.8377	101.694	139.98	11.6729	76.002	177.331	45.8852	73.4652	137.284	63.817	68.6949		39.4508	108.252	25.4765	41.2727	39.4351	34.4346	54.7544	62.1598	86.951	107.173		43.1599	3.7554	47.6358
	286	44.3886	65.4334	91.2272	67.3347	57.1748	123.269	12.8826	94.7506	39.1574	87.3395	40.5073	107.223	102.1	111.823	111.029		28.5761	128.448	63.7819	19.1466	93.9965	53.733	16.6215	97.642	124.464	10.7169	86.3241	174.523	65.9294	76.8931	147.042	69.1921	60.33		38.5717	117.254	26.1006	44.7376	42.2639	31.2175	54.2319	67.1207	84.7291	111.851		45.3438	2.79472	58.1448
	288	45.9284	68.3242	92.7404	72.1008	57.824	120.318	7.21104	84.0058	40.7604	84.6586	34.6499	96.6362	95.3395	103.073	112.439		21.9686	123.772	53.9403	23.0666	93.9165	56.3802	15.796	92.8199	136.557	17.0307	90.9967	169.685	60.5089	77.8062	148.714	57.9095	57.0895		39.1521	114.068	29.7549	43.1689	43.1155	37.7326	56.6693	64.4093	80.8509	112.835		44.5862	4.61604	50.5658
	290	52.3044	62.4041	87.6183	61.1273	58.2121	113.202	9.44764	89.1938	36.1986	83.8844	35.8168	104.265	96.34	98.7607	121.201		24.1705	124.893	57.5163	18.5148	102.562	55.9726	19.895	99.0395	138.808	16.138	81.6594	163.801	54.7769	71.0888	137.854	52.3823	61.411		35.6313	107.272	27.7014	44.3403	39.8969	35.5746	71.7003	67.2812	82.9665	112.799		46.191	8.43517	57.758
	292	45.3349	62.2528	93.9698	69.1741	50.0079	110.736	12.4908	88.75	32.0969	87.6248	39.016	100.575	106.864	104.836	112.274		24.7124	124.954	53.6882	24.4291	96.1584	54.8613	20.6222	98.0279	134.663	15.9084	80.6303	184.267	53.705	76.8807	154.043	59.5356	72.3438		38.1857	107.37	27.7758	43.0409	44.7699	38.5926	58.956	66.8891	79.2798	117.657		42.2949	7.88618	49.5216
	294	55.5037	63.4483	91.3721	62.8061	58.956	118.899	7.10346	84.7996	36.6897	84.7932	38.3421	98.8287	111.286	110.066	110.75		26.8204	135.337	63.5595	22.0506	102.389	55.7974	19.5705	99.905	131.254	11.2652	85.281	172.544	51.3884	78.5106	156.344	57.7841	65.6045		40.4125	117.804	27.8105	44.1527	41.0349	36.7104	61.7068	59.1395	71.8216	121.394		46.3017	5.28314	47.6279
	296	50.2668	60.8034	87.8001	67.6621	61.3937	132.036	9.46124	87.521	36.3536	73.0257	34.2043	99.4889	103.253	100.069	111.851		26.3715	126.148	54.2992	20.1913	99.1211	57.3512	15.1279	110.501	134.812	12.6474	78.0553	172.85	47.0226	69.2221	145.121	62.5322	71.3671		38.1127	110.002	29.5646	41.5426	40.1335	32.7412	52.527	69.8467	80.2652	107.321		40.1614	3.79918	55.0343
	298	50.9734	65.4864	85.0305	62.0377	57.653	120.993	9.94253	88.177	39.5819	81.7353	37.7379	104.244	100.966	101.048	111.207		25.1774	142.493	58.956	20.1292	99.2845	59.2255	19.9858	93.8166	138.951	13.0118	93.0322	196.412	58.578	76.4657	145.634	46.7079	68.4019		36.928	121.134	28.024	39.0317	43.5266	36.1314	61.6836	74.7455	74.5122	113.332		42.7347	5.89132	46.4093
	300	43.3023	64.9796	87.2423	60.1513	57.1862	114.321	7.55661	91.6293	38.6396	77.2467	39.2674	102.651	104.21	93.9765	118.884		21.0444	130.259	59.1223	22.6451	99.4276	49.2989	17.7194	103.384	126.771	13.3306	83.5462	180.194	54.2038	75.2066	131.44	51.7433	66.3613		36.1469	114.003	28.7455	42.3436	47.1313	36.9746	66.2903	68.7488	86.8863	115.22		45.9114	4.84506	52.0333
[truncated: 2 more columns]

## Sheet: Panel E
NS shRNA	38.7687	38.5897	39.5794	40.6113	41.0603	41.8281	42.6926	43.4875	44.0642	45.4967	46.0051	46.6836	48.1309	49.0067	49.1962	50.3366	51.6057	51.8992	52.2222	54.1382	54.374	54.8468	56.1705	59.4556	58.2297	62.2816	63.1217	63.966	65.5156	66.3654	68.0722	69.7135	72.0851	72.109	73.9841	76.1944	77.1376	79.2104	79.8948	82.5317	84.8208	85.5279	88.8938	90.7582	93.3153	96.0525	95.9133	100.704	103.51
	18.8693	18.8566	19.2445	19.737	20.7248	21.2103	21.5127	21.6879	22.3991	23.0651	23.796	23.7773	24.5725	24.8284	25.6423	25.6826	26.3738	26.3224	26.7177	27.5566	27.6846	27.8892	28.7435	31.4096	29.7941	35.1684	35.8426	36.94	38.6824	39.549	40.8892	42.6432	43.9442	46.0742	46.9247	48.9456	50.4506	51.9287	53.2545	55.5127	56.9977	58.119	59.5864	61.4472	63.4213	64.9946	65.1757	67.6329	68.9676
	12.1418	11.8003	12.2534	12.9326	13.5866	14.1909	14.9123	15.2604	15.6594	17.0433	17.7331	18.1084	19.1012	19.7595	20.42	20.7535	21.4457	22.1429	22.5057	23.6606	23.8613	24.086	25.2689	28.2295	26.5825	30.947	31.6377	32.7012	34.0604	34.951	35.877	37.6186	38.9333	39.6233	40.7857	41.9616	43.4184	44.5423	44.9285	47.1591	48.2209	48.7869	50.5515	51.3482	52.6901	54.1989	53.4767	55.1734	57.0744
	36.3276	35.6443	36.3538	36.6382	37.1803	37.1704	37.8252	37.7491	38.0407	38.8512	39.3654	39.5991	40.077	40.5493	40.923	41.4027	41.5465	41.4413	41.9027	42.5095	42.5008	43.1508	43.9475	46.6978	44.7092	49.532	49.9485	51.1336	52.6825	54.3264	55.9414	57.9371	59.6841	61.8362	63.6751	65.7931	67.7213	69.7973	71.7902	74.4326	76.6339	78.5511	81.4025	84.1236	86.2137	88.8298	89.4701	93.0875	95.812
	39.2675	38.3427	39.1647	40.1397	41.2634	41.6259	42.1668	42.6155	43.2578	44.2232	45.6234	45.9513	46.8084	47.4137	47.4902	47.4601	48.2794	47.771	47.944	48.1928	48.637	49.1946	49.9	53.3271	51.2074	58.4159	60.1206	62.2226	66.0351	68.1693	71.6493	75.7257	79.4696	82.6479	86.9108	91.312	95.1627	100.038	104.247	110.085	114.5	117.94	123.974	128.952	133.514	138.648	140.649	146.768	152.708
	34.5331	33.3743	33.867	34.9744	36.22	36.3765	36.8699	37.402	38.3748	38.8899	39.6893	40.0236	41.5275	41.4059	42.1469	41.8499	41.9813	41.9617	41.6195	43.0047	41.7012	42.8385	43.2043	46.634	43.6432	50.942	52.1941	55.299	58.6058	61.3402	65.4619	69.2128	72.6663	75.7429	80.1448	84.2939	89.3622	94.8178	99.1464	105.542	110.915	115.207	120.421	127.2	133.328	139.643	141.346	148.009	154.575
	22.7355	22.4126	23.0663	24.0194	24.982	25.2476	25.6842	26.2633	26.8966	27.8262	28.2939	28.9451	29.6917	30.6567	31.0608	31.7474	32.1925	32.7349	33.3617	34.1373	34.149	35.0242	35.9502	38.3185	37.1315	41.3465	41.5865	42.3955	43.5411	43.9252	44.9682	46.1635	47.5373	48.7721	50.2347	51.2603	52.354	53.6013	54.2281	56.1668	57.4016	57.5938	59.4204	60.7126	61.4054	63.4383	62.8621	64.7334	66.4457
	15.313	15.1951	15.7626	16.1077	16.9535	16.4791	17.297	17.6237	18.0899	18.4359	19.001	19.2703	19.8966	20.4101	20.3444	20.9176	21.1269	21.5211	21.6154	21.9551	21.7329	22.3422	23.1182	25.7547	23.8075	27.0329	27.3664	27.6939	28.8465	29.4298	30.5176	31.4738	32.4565	32.7352	33.2091	34.7519	35.8347	36.7925	37.5757	39.399	40.3911	41.1613	43	44.0234	45.5982	47.7296	47.6578	49.931	52.0288
	28.17	27.4583	28.4116	28.6823	29.399	29.9115	30.5383	30.6591	31.4908	32.1743	33.1719	33.2042	34.2235	35.0309	35.3164	35.9134	35.8636	36.6569	36.5625	37.7934	38.0393	38.3175	39.2172	42.2177	39.7664	44.8428	45.8353	47.4689	49.5422	51.3243	53.3169	55.3167	58.2011	59.3559	61.6594	64.6128	66.9161	70.48	72.7984	76.0622	78.5801	80.924	84.649	87.1539	89.6271	92.8573	93.8068	98.0463	101.357
	48.4655	47.2327	48.1534	49.0177	49.6213	49.6618	50.5415	50.902	51.1982	52.0985	53.6209	53.3786	54.7143	55.4101	55.7727	56.5831	56.8342	57.2109	57.2014	58.4359	58.7126	59.4898	60.2883	62.8583	61.1413	66.776	68.2728	69.4143	72.1039	73.3253	75.5685	77.5928	80.6529	80.6298	82.9362	85.6453	88.3458	91.1677	92.9829	96.0738	98.6059	100.52	104.168	106.566	108.991	111.383	112.199	116.636	119.031
	18.2426	17.9994	18.8709	20.0504	21.0788	21.5802	22.7169	23.2	24.5142	25.856	27.2169	28.3515	29.3768	30.3731	31.0187	31.8276	32.8694	33.5457	34.1329	35.1588	35.6219	36.7989	38.1387	40.9357	40.0967	45.7505	46.7169	48.0251	50.1047	51.7627	53.4954	56.0018	57.9564	59.7901	62.7397	64.8414	67.0655	69.7329	71.2328	74.1259	76.1736	77.8504	80.7921	82.9468	85.4411	88.0299	89.2213	92.7379	95.0517
	36.0913	35.4323	36.0818	36.6864	37.5292	37.7955	38.7565	39.0279	39.5252	40.5926	41.4013	42.0454	42.6305	43.6707	44.2187	44.3151	44.8649	45.0404	45.6089	46.6343	46.554	47.5124	48.5027	51.4786	49.6229	53.6334	53.9878	54.7195	57.016	58.0708	59.6178	61.7863	63.4272	64.5805	66.7317	69.2336	71.0396	73.8589	75.5555	78.8539	81.3715	83.4308	86.4492	89.3168	92.7923	95.6797	96.9249	100.485	104.6
	25.9591	26.2114	26.6038	27.1938	27.7081	27.902	28.6068	28.8951	29.4517	30.4774	30.813	30.9778	31.8938	32.3543	33.1857	33.0456	33.4568	34.2041	34.3792	35.76	35.8486	36.557	37.6405	40.0183	38.4696	44.7667	45.3141	46.4418	48.3465	48.9166	50.902	52.4309	54.5492	56.0858	57.8699	59.8348	61.8645	64.0744	65.7524	68.6006	69.8686	72.1806	75.0901	76.8345	79.3337	81.654	82.7116	85.4757	88.8114
	64.2965	63.7536	64.7085	65.2217	66.6048	66.323	67.5612	67.5304	68.1168	69.2532	69.7301	70.3283	71.2416	71.8473	71.8073	72.3449	73.1255	73.3903	73.597	74.4598	74.5524	75.321	76.5647	80.163	77.9685	85.0445	85.6831	87.4603	89.3841	90.2552	91.672	94.0687	96.2545	97.9098	100.154	102.471	103.794	105.502	107.127	109.95	111.757	112.677	115.518	117.408	119.583	121.959	121.837	126.277	128.475
	44.9424	44.715	45.3332	46.016	46.8331	47.0265	47.8748	47.9945	48.3378	49.1367	49.6984	49.8302	50.7294	51.411	51.4332	51.8849	52.1475	52.1012	52.1958	52.8456	52.1074	52.8207	53.8936	56.1633	54.2599	59.6453	60.2574	61.5806	63.0281	64.4147	65.5887	67.7026	69.8211	71.6095	73.2483	75.8923	77.6448	79.5225	81.0131	83.7988	85.4812	86.6196	89.6067	91.5778	93.545	95.6199	95.9357	99.6482	102.374
	35.7478	36.018	37.4676	39.204	41.5493	42.2147	43.6332	45.1565	46.3108	48.5306	50.3152	51.7031	53.654	55.0083	56.3033	57.5612	58.4089	59.0676	59.5092	60.3453	60.6344	61.0049	62.8498	66.0484	64.0116	66.1183	65.8727	66.8464	68.264	68.9977	70.0162	71.9759	73.9816	75.8063	77.365	79.7558	82.5634	84.4608	85.8165	89.6522	91.0487	92.7487	96.0933	97.972	100.488	103.45	103.345	107.019	110.031
	22.5563	22.0901	22.9835	23.7365	24.8517	25.2509	25.8658	25.8434	26.8687	27.5629	28.1408	28.659	29.3932	30.4428	30.1822	30.849	30.8492	31.6309	31.7859	32.204	32.3899	33.0182	33.5635	37.0227	35.1487	39.9645	40.5617	42.1088	43.855	45.1816	47.0467	48.9122	51.1738	52.8294	55.2333	56.9561	59.3276	61.6762	63.2283	66.5819	69.0858	70.5214	73.7319	76.2861	78.9053	81.5634	82.3888	86.3341	89.848
	27.0999	26.1967	26.78	28.4362	28.9615	29.4508	30.3447	30.198	31.2524	32.0239	33.1086	33.4246	34.3266	34.7827	35.3352	35.5677	36.4922	37.2295	36.9746	37.9062	38.3175	39.3228	40.6578	44.2592	41.8535	48.8934	49.6171	50.8812	53.8093	54.9226	56.1009	58.6174	61.2843	63.6867	65.9726	68.1047	70.8544	72.7345	74.8318	77.9217	80.2398	81.3937	85.0951	87.2093	90.6306	93.3144	93.8914	97.6499	101.411
	44.1713	44.212	44.5659	45.1322	44.9687	45.1129	45.667	45.5741	45.8172	46.5307	46.013	46.5168	47.1486	46.923	46.8481	47.4359	48.2167	48.631	47.8842	47.9836	49.2972	48.7299	49.9061	49.7679	50.5597	51.1013	52.9476	61.8742	60.4434	63.3666	66.5851	69.7619	72.6128	77.4101	82.1835	86.6467	90.7837	94.1847	98.4053	103.255	107.544	112.189	115.832	120.112	124.414	127.445	133.126	135.521	139.376
	32.4758	32.3728	32.7106	32.7723	32.6865	32.9448	33.2086	32.8378	33.1428	33.7554	33.6643	33.6885	34.3646	34.0129	33.9408	34.2835	34.4029	34.3423	33.8637	33.9449	34.7416	34.0001	34.5504	34.7453	35.0151	31.1691	31.7837	35.4137	35.9087	37.1046	37.9337	39.2458	39.4358	41.5859	43.2058	44.4107	45.5291	46.6484	48.0931	49.6294	50.8255	52.0699	53.9401	55.289	56.5225	58.3846	60.2865	61.3841	62.4084
	13.5536	13.3867	13.7565	13.8188	14.1803	13.9447	14.5248	14.5607	15.0211	15.0978	14.7098	14.9126	15.8638	15.9083	15.7588	16.4366	16.7136	17.4906	16.4175	16.984	17.7884	17.353	18.0927	18.5123	18.6634	19.9196	20.7556	20.8619	22.105	23.414	24.6091	25.1668	26.3607	28.2082	30.4639	31.5714	32.861	34.4842	36.2046	37.6791	39.4956	41.7847	43.8877	45.194	47.6961	49.5489	52.2619	54.2386	56.1194
	55.8488	54.7062	54.9433	55.3206	56.1212	56.3284	57.0212	56.3277	56.3999	56.5241	56.0296	56.0179	56.8519	56.4955	56.3642	56.1865	56.7135	57.1934	55.9249	56.1909	57.1211	56.5911	58.2955	58.349	58.384	58.0572	59.7575	61.7603	63.2653	65.4587	67.7213	69.8378	72.2428	76.2193	80.006	83.8403	87.3302	90.5029	94.1257	98.3259	101.765	106.273	109.903	113.782	118.081	121.362	127.194	130.29	134.067
	8.36069	8.12605	8.44829	8.17731	7.65892	7.69751	7.91082	8.13193	8.04775	7.91821	7.94207	8.15628	8.01972	8.78563	8.3886	8.56878	8.68769	8.83838	8.3158	8.31793	9.00417	8.77654	9.70014	9.93773	9.7782	9.13656	9.8387	10.9597	11.983	13.1494	13.7061	14.5092	14.6085	16.4026	17.2237	18.3613	19.345	20.7568	21.6121	23.4024	24.4542	26.0413	27.8309	29.0652	30.4275	31.6063	33.3846	34.2473	36.2203
	22.5054	22.4582	22.4368	22.4595	22.2039	22.3612	22.3796	22.5615	22.2567	23.3095	22.9226	23.1489	23.4931	23.1356	23.2982	23.18	23.5516	23.613	22.8234	23.2456	23.8453	23.2861	23.81	24.0987	24.0826	23.442	24.7301	34.8745	28.9933	30.323	31.5786	32.9541	33.7916	35.8594	38.1701	39.2823	41.1226	42.6015	44.3104	46.1345	47.1383	49.8124	51.7161	53.141	55.7772	57.1405	59.7634	61.0505	62.9089
	61.808	61.5287	61.6137	62.5446	62.5764	62.7878	62.6907	63.1695	62.9591	63.9237	62.7295	63.4555	63.7216	63.4764	63.8696	63.7915	63.7873	64.7962	63.5244	62.8248	64.8695	63.944	65.8914	64.9769	65.6197	66.2338	68.6853	67.6651	71.3222	74.5134	77.0355	80.6965	83.4361	88.4513	91.7623	95.8441	99.6525	103.682	108.172	113.277	116.405	122.063	126.329	130.65	135.3	139.816	145.997	149.366	154.068
	28.0978	27.2985	28.1343	28.0167	28.1841	27.9957	28.2045	28.0533	28.1974	28.3033	28.0932	28.5702	28.8912	28.7368	28.668	28.8718	29.3895	29.4038	28.8723	29.0818	29.9774	29.3961	30.0231	29.5338	30.5352	29.7136	31.0306	31.6263	32.1842	33.8078	33.8898	35.0091	35.9191	37.3785	38.4873	39.8286	41.0167	41.8685	43.1222	44.7845	45.8418	47.804	49.4548	51.3966	52.3974	53.9793	56.5132	57.3085	59.4619
	32.094	31.6354	31.8801	31.863	31.5571	32.1164	32.577	33.3567	32.8963	33.1114	32.6774	32.7547	33.2466	32.8453	32.4193	32.8353	32.9767	33.1422	32.3632	32.6991	33.0613	33.1545	33.6311	33.6735	33.8804	33.4477	34.7485	34.0172	37.5734	38.7075	40.3709	42.1844	43.4232	46.4635	48.6343	51.4879	53.5571	56.0998	58.799	61.7543	64.6286	67.2002	70.0382	73.1917	75.8756	79.011	82.8854	85.4121	88.4576
	22.5901	21.5634	22.4227	22.3934	22.3287	22.7697	23.2179	23.5968	23.5655	23.6703	23.0738	23.315	23.2193	23.4916	23.235	23.5518	23.3077	23.8278	23.3007	23.7734	24.0418	23.6994	24.5268	24.9108	24.9839	24.2636	25.3425	30.3948	26.1772	27.7895	28.6951	30.1081	31.1165	33.2651	34.819	37.1874	38.231	40.4915	42.148	44.59	46.644	48.2487	50.795	52.6852	55.135	57.1005	60.8373	62.1473	64.819
	39.4041	39.3951	39.1461	38.6108	38.4881	38.6134	38.2999	38.1895	39.0061	39.2044	39.2478	38.7728	38.8904	37.5032	38.1172	38.8896	38.4443	38.1588	38.137	38.3886	37.7179	38.4315	39.0669	38.2953	38.9377	40.6974	41.8406	43.1476	45.7715	47.7811	50.5259	53.3969	56.2764	58.2625	61.5185	66.9507	70.645	75.136	79.7687	83.691	88.1414	92.0152	96.1544	98.6484	104.917	109.591	114.517	118.774	123.274
	35.9871	36.0715	36.1139	36.4395	36.1139	36.641	36.3802	36.1808	36.8678	37.3018	37.2322	37.1075	37.3105	35.9975	36.0901	36.566	36.4266	36.4835	36.5813	36.3466	35.4313	36.5164	37.1214	36.344	36.6095	37.5943	38.2224	39.5892	41.6785	43.5651	46.2376	49.1811	52.1342	53.7442	56.9061	62.2813	64.5671	68.9636	72.6018	76.1867	79.645	83.1127	87.1747	89.1973	94.4919	97.6869	100.714	104.038	107.856
	29.0692	29.1666	28.7585	29.4068	29.2178	29.6903	29.4665	29.3238	29.8515	30.6545	30.3146	30.2204	30.5367	29.3184	29.7331	30.3831	29.9054	29.6948	28.7994	30.2611	29.1035	29.8562	29.6258	29.6272	30.1068	30.2321	31.3975	32.318	33.0154	35.2111	36.4512	38.011	39.5432	40.5734	42.3605	46.3138	49.2714	52.4324	56.9081	59.425	63.208	67.0141	70.2965	71.5975	77.9314	81.786	86.2316	90.06	93.6154
	24.8396	24.5587	24.8306	25.0309	24.8163	24.8666	24.744	24.8356	25.345	25.677	25.6579	25.4528	25.3418	24.7991	25.3076	25.4952	25.1778	25.4186	24.6917	25.3288	24.736	25.1029	24.5642	24.8018	25.0771	25.9378	26.6102	27.6162	27.6716	28.264	29.8872	30.8803	32.0343	32.0815	33.7507	36.6508	38.3716	40.6665	42.6378	45.0246	46.3227	48.7482	50.3611	50.3284	54.0271	55.5932	57.7583	59.4021	61.1814
	35.4031	36.0265	35.9915	35.8338	36.3077	36.6091	35.626	36.0085	36.6314	36.8742	37.1277	36.51	36.7657	36.1073	36.1121	37.005	36.6177	36.8955	36.5242	36.5744	36.1173	36.7546	36.923	36.4795	36.6385	38.1461	38.6682	39.5809	41.4282	42.2581	43.6084	44.2912	46.0415	46.6847	47.4965	50.8949	52.693	54.6621	56.6493	58.7401	60.6144	62.1495	64.0284	64.8687	67.7828	69.3534	71.1652	73.2738	74.9009
	28.5283	28.6058	28.885	29.1622	29.5277	29.7591	29.4066	29.698	30.3187	31.1923	30.9091	30.4186	30.9765	29.7711	30.0617	30.7235	29.9831	30.3772	30.0734	30.7266	30.0588	30.8568	31.099	30.3793	31.0474	30.9869	31.9423	32.9025	34.247	35.401	36.9719	38.5405	40.505	41.0864	42.841	46.8048	48.9856	51.5845	54.8713	58.0222	60.3892	62.8151	65.1484	65.82	70.0103	72.091	74.711	76.8815	79.3665
	22.6339	22.7123	22.8858	22.8697	23.1158	23.5483	23.8051	23.577	24.451	24.9244	24.8944	24.7999	25.9207	24.5839	25.4564	25.9264	25.7391	26.0808	25.7543	26.0569	25.2503	25.9706	25.5141	25.8526	25.6172	27.5452	28.595	29.5436	32.2159	33.3074	34.8936	37.6971	40.0097	41.6376	43.9036	48.5083	51.3682	54.4351	58.4582	62.8431	65.6445	69.0703	72.5273	74.3601	79.3121	82.0307	86.2396	89.0155	91.9122
	15.6885	15.6844	16.3803	16.1397	15.9432	16.3482	16.234	16.0614	16.6757	16.6494	16.395	15.7695	16.1577	15.2335	15.4873	15.4433	15.4302	15.2785	14.8942	15.3005	14.8614	15.1815	15.3685	14.6126	15.1159	16.3655	17.2936	18.0121	18.9744	20.1973	22.1649	23.9133	25.6036	26.605	28.1858	32.2996	34.9422	37.6809	40.812	43.2958	46.2965	48.6897	51.5387	52.884	56.4138	58.8403	61.8127	64.3755	66.3081
	33.8544	33.8743	33.9757	34.0277	33.8196	34.3839	33.9656	34.1627	34.7058	34.9656	35.0969	34.7796	34.7189	33.4065	33.902	34.6138	34.0644	34.4107	33.7367	34.253	33.5606	34.6674	34.7577	34.1851	34.4971	38.6594	39.7187	41.0376	43.2834	45.5412	48.0968	50.5235	53.7142	55.9744	58.3369	62.8945	65.8504	68.963	73.1759	76.6955	79.4615	82.024	85.4955	86.7806	91.7898	94.3258	96.7396	99.7808	102.832
	27.8226	27.6955	27.5694	27.819	27.727	28.2618	28.1202	28.3536	29.1711	29.2177	29.4784	28.9914	29.4461	28.4529	28.4765	29.1977	28.9527	28.8818	28.4077	28.9294	28.4972	28.9087	28.9417	29.1215	29.0475	27.7396	28.6801	29.6376	30.0397	31.162	32.1907	33.6158	35.4199	35.7886	37.4476	40.6876	42.1235	44.3382	46.4226	48.6092	50.4715	52.0923	53.7498	53.8721	57.21	58.5256	60.3469	62.0423	63.5963
	23.0462	23.0942	23.0606	23.0965	23.0039	23.3359	22.6605	23.3522	23.6285	23.9176	23.8035	23.2765	23.6541	22.7248	22.6265	23.0422	22.6625	23.1523	22.9332	22.9329	22.592	22.9564	23.08	22.984	22.961	23.6923	24.0971	24.8045	25.859	26.406	27.3805	28.4772	29.361	29.6032	31.2035	34.1822	36.2657	37.8901	40.3042	42.7076	44.5355	46.3499	48.8111	49.8836	53.5046	55.6904	58.5259	61.1202	63.9359
	37.5153	37.7824	37.9913	37.8522	37.8443	37.9811	37.8177	37.1264	38.7583	38.8293	38.2699	37.4096	38.4961	36.074	36.0889	36.4407	35.7821	36.3624	35.9179	36.6512	35.4852	36.5272	36.1566	35.1935	36.4805	35.8677	36.9073	37.956	39.2662	40.8865	42.368	43.4944	45.3593	46.1754	47.5085	51.6384	52.9581	55.1769	57.8037	60.2879	61.222	63.9348	65.6717	66.2614	70.0078	71.7504	74.3905	76.3302	77.571
	22.2786	22.43	22.0508	21.9862	22.334	22.727	21.8806	21.7243	22.794	23.2286	22.9318	22.0735	23.1255	21.3603	21.8781	22.7334	22.3899	22.4416	22.3286	22.283	21.5427	22.4474	22.5739	22.1254	22.3895	26.3478	28.5763	30.7514	34.404	37.4801	41.7598	45.1431	49.3582	51.8818	55.7634	62.3572	66.2143	71.279	76.0045	79.6227	82.8853	85.9652	89.913	91.7143	96.3632	99.6132	102.8	105.292	107.957
	33.138	32.5499	32.2902	32.7111	32.9275	33.1048	32.3509	32.8008	33.1019	33.2624	33.427	33.0366	32.7528	32.3977	32.1944	32.4099	32.3878	32.558	31.6032	32.2249	31.5533	32.0236	32.0066	32.1282	31.7272	34.7469	35.2912	36.2464	38.7629	39.8546	41.9039	43.9544	46.0214	47.3509	49.3138	54.2617	57.0889	59.846	63.3893	66.8245	69.9369	71.9724	74.9063	76.1069	80.1077	82.5314	85.593	87.3835	90.0348
	34.6188	33.6222	34.4865	34.0782	33.8025	34.3823	34.3757	34.7804	35.1685	35.9196	35.7304	35.5534	35.8323	35.1057	34.9235	35.3075	35.2973	35.4916	35.2732	35.8525	34.7577	34.9868	35.6263	35.4299	35.012	36.2101	37.58	38.2043	40.2504	41.7271	43.5122	45.7635	48.0122	49.3791	51.5777	56.2683	59.2939	62.7488	66.7634	69.9464	72.6867	76.6355	79.5835	81.7217	86.2065	88.9829	92.5247	96.4388	99.3711
	30.2042	29.8722	30.4372	30.6523	31.0126	31.0356	30.5479	31.2017	31.9482	31.9578	32.6973	31.9832	31.7374	30.8578	31.0796	32.1362	31.608	32.3627	31.9467	32.1681	31.3764	31.9526	32.306	31.2774	31.8876	34.2839	35.2395	35.904	37.5722	38.6664	40.268	42.0951	44.4138	45.8908	48.5882	53.1279	56.6224	60.3747	64.5468	68.3063	72.0327	75.5724	79.2802	82.2313	86.9883	90.5858	94.6989	98.0919	101.088
	25.5513	25.5128	27.0028	26.9533	27.7556	27.3384	28.4619	28.4324	29.119	29.725	29.6533	29.7386	30.0704	30.4708	30.0769	30.1798	31.1765	29.5525	30.3899	30.8494	31.0513	31.3027	30.9015	31.0277	31.2806	32.8096	31.2299	32.3052	33.5982	35.2363	37.1869	38.0717	38.1908	38.2881	38.7082	39.1137	41.3148	43.4843	45.5366	48.1707	49.9183	51.2538	52.3044	53.6596	52.6031	53.4867	54.8373	57.1885	59.3651
	30.3383	30.5172	31.639	31.7807	32.3475	32.5635	33.769	33.7077	34.4008	34.6769	35.0241	36.162	36.1279	35.7835	35.5963	36.5833	36.2872	36.457	37.5096	37.7531	37.4659	37.543	37.4325	38.1191	38.5508	39.1444	39.6325	40.2851	40.6938	43.2264	46.0695	47.2137	47.6171	46.8179	48.4382	49.2779	51.3	52.2793	54.8728	58.1131	58.8183	60.4864	62.0051	61.3486	60.5528	60.6983	61.9775	62.6089	64.5864
	26.3298	25.8283	27.0644	27.8477	27.4964	28.4056	28.7496	29.8015	29.6868	29.7253	31.1682	31.4298	30.7701	31.1878	31.9811	31.8185	31.5093	32.4222	31.9597	33.5761	32.9413	32.2607	32.3106	32.4515	33.5603	34.8162	33.6714	34.8089	36.5654	39.1059	40.4512	42.518	42.4433	42.5498	42.6043	43.5994	45.2957	47.132	49.7079	52.0636	53.8818	54.5356	55.6258	55.4389	54.4979	54.4422	55.9919	56.6492	58.0197
	27.3478	28.1851	28.4668	28.5679	29.1397	30.3622	30.0354	30.9745	31.6041	32.0534	32.1354	32.1951	33.157	32.4317	33.1013	33.0566	33.7366	33.3139	33.684	33.8345	34.1878	34.3348	34.4841	35.3084	36.1553	38.5177	37.6872	38.3147	40.1548	42.799	44.3012	46.0022	46.8579	47.8226	47.9918	49.4139	51.5108	53.9826	57.3346	60.3838	62.7267	64.5551	66.4014	66.0989	66.1936	66.5907	68.6114	70.7764	72.8679
	21.822	22.5413	23.0881	23.3471	23.2707	24.2839	24.8201	25.6669	25.7852	26.3478	26.7957	27.1899	27.0108	27.3553	27.2133	27.3331	27.7894	27.1736	27.6023	27.9755	27.5642	27.784	27.6822	28.9762	28.9573	30.6348	29.2397	31.0032	31.4288	34.83	36.1176	37.6318	38.363	38.7958	38.5195	39.993	41.8125	44.0115	46.5319	50.3517	51.3901	53.3672	54.9674	55.5948	54.0438	54.3488	56.9549	58.0654	59.8062
	26.0502	26.1954	27.0445	26.6965	26.5704	27.1277	27.5458	29.0585	29.3516	28.8691	30.1268	29.2113	30.1035	30.0211	31.2111	30.1828	29.6267	29.9405	29.0116	30.9614	31.9191	30.4025	29.9037	30.4439	30.3448	31.9358	31.0873	31.3036	33.4684	35.4636	36.2061	38.0122	37.4889	37.3225	37.3862	39.0775	40.5714	41.8263	45.429	47.2392	49.7583	51.1968	52.4187	53.9478	53.4054	54.1875	56.1411	58.7452	60.0348
	24.0182	23.1181	23.8499	24.1514	25.4486	25.4806	25.6656	26.3159	26.6655	27.954	27.2756	28.2125	28.7569	27.7859	28.9055	28.7204	28.4265	29.2576	28.9757	29.0999	29.2285	29.4282	28.49	29.6674	30.0203	30.7886	29.8067	30.3591	31.6704	34.9537	35.366	37.1236	36.0647	36.8226	37.2157	38.397	41.401	42.7292	44.8153	48.1483	48.9887	50.6637	51.993	53.4539	52.3545	52.2767	53.0818	55.0586	57.4158
	25.5372	25.5849	26.2848	26.1333	25.6156	26.9292	27.8306	27.5184	28.4471	28.3589	29.3008	29.3001	29.7978	29.5645	30.681	30.0913	29.5784	29.0301	30.4313	30.7688	30.9695	31.0527	30.0562	30.7946	31.0456	32.7239	31.6585	32.276	34.8383	36.9738	38.4146	40.4267	40.2184	40.7264	42.0671	43.2631	45.3772	48.0705	50.4424	53.7326	56.0823	58.7572	60.2807	60.9357	61.4419	62.0474	64.0867	65.3648	68.8774
	25.7781	25.6019	26.9904	27.0937	28.0559	28.2317	29.0613	29.3494	29.2485	30.3042	30.544	30.438	31.2739	30.7228	31.4866	31.5055	31.2433	30.9467	32.0288	32.192	32.6513	32.496	31.8786	32.7815	32.7225	34.1532	33.2381	34.2772	36.506	37.8575	39.3851	41.1806	40.8181	40.7625	41.0003	41.5451	43.7957	44.3683	47.0294	50.2318	52.207	52.4604	56.0653	56.0109	54.9884	55.9047	57.9272	59.3539	61.2601
	18.1075	18.6571	18.421	19.5889	19.8591	20.45	20.3904	20.8018	21.2476	21.7638	22.2477	22.5958	22.3689	21.6094	22.1035	22.9317	22.5305	22.4852	22.9681	23.1332	22.9278	23.1352	22.9073	23.4915	23.292	24.4228	23.3391	24.4774	26.099	27.7867	29.6852	30.5229	29.8957	30.4274	30.9441	30.192	32.4541	33.0762	35.3152	38.4224	39.6257	39.5116	41.1996	40.5815	39.8848	40.1476	41.1105	42.4138	43.8208
	21.0167	21.0329	21.4028	22.4078	21.7254	23.0913	23.4554	23.1681	23.5995	24.4567	24.4264	25.2015	24.3733	24.8368	24.3154	24.3374	25.6064	25.3532	24.791	24.8569	25.7157	25.2511	25.4951	25.3552	25.8439	28.9914	27.4218	29.4615	30.2394	34.2843	34.8837	36.826	37.3897	37.1182	37.203	39.6006	40.3221	41.0771	43.7939	46.7323	49.1875	48.0574	50.4401	50.8232	50.6607	50.5123	50.9633	51.8142	55.6222
	26.4307	26.8928	28.2472	27.2773	28.6299	28.9793	29.1747	29.7558	30.6646	30.2094	30.588	31.1424	32.0685	31.8331	32.149	31.2237	32.3421	32.0428	33.4272	32.2971	33.3772	33.3372	32.6975	33.8486	33.6558	34.83	33.9317	34.9487	36.6727	39.1752	40.225	41.1559	40.4935	41.2824	40.3763	42.1102	44.4214	45.2015	47.6351	49.5777	51.6298	52.6072	53.2711	53.4115	52.9041	53.2215	54.2786	55.6583	57.5043
	23.2776	22.446	24.1383	23.7574	24.3095	24.6831	25.3501	25.4768	25.7168	26.0933	26.4346	26.2721	27.6709	27.275	26.9683	27.1087	27.6907	26.9291	27.4727	27.9466	28.0536	27.7774	27.6568	27.3137	28.039	28.8581	27.8551	28.8618	29.7166	32.6741	33.6919	34.5635	34.9761	35.1479	34.9327	35.4319	36.4803	39.1505	41.5789	42.5454	45.0326	44.9619	46.7874	47.2964	46.3111	47.1041	48.1525	48.8862	50.8477
	31.4324	31.5081	32.8331	33.2811	32.5799	33.9418	34.282	34.8772	35.1937	36.4868	36.6645	37.1623	37.1254	37.208	37.0331	37.6255	37.2904	37.4645	37.6492	38.5591	38.7583	37.8745	37.8533	38.994	39.3659	40.9668	39.4456	40.691	43.3511	45.5303	47.7758	49.2458	49.959	50.2671	50.5721	51.6984	54.0817	55.8938	59.2441	61.4507	64.4501	65.3291	66.3496	66.9063	66.095	67.6364	68.6474	70.7993	71.5335
	21.7457	21.8496	22.9327	23.1376	22.8866	23.7771	25.2145	25.1384	26.1236	25.7312	27.3019	26.4841	28.5391	27.1905	27.9209	27.8961	28.8693	27.2434	28.217	28.7818	28.7767	28.6022	29.3369	29.7761	29.4777	30.8943	30.13	31.3176	32.6452	34.244	35.9001	37.1554	36.9564	35.7533	36.227	37.4883	39.1905	40.2457	42.1279	44.8107	46.5026	48.1848	48.6578	48.1804	48.4333	48.549	50.165	51.1947	53.4029
	26.1423	25.707	27.18	26.7952	26.9571	27.6019	28.0087	28.6679	29.8902	30.1029	29.9825	29.5879	31.4404	30.6007	31.5789	31.6015	31.9707	31.1196	31.673	31.6179	31.45	31.4383	31.1534	31.2964	32.1665	33.2524	31.4242	33.0476	33.791	35.6627	37.1164	38.995	38.8121	38.0379	39.1492	39.5369	42.8045	44.4796	47.0604	49.1495	51.2351	53.5655	55.0504	54.6441	54.9939	54.6739	56.4418	59.5215	60.7187
	26.454	26.7607	28.0338	27.4287	27.9247	29.0067	29.3043	30.0974	30.6656	31.5763	31.2598	31.383	32.3929	31.7347	33.0723	32.4543	32.8022	32.3721	33.3124	33.1737	33.5643	33.0091	33.0435	33.4917	34.1348	34.8508	33.6438	34.273	35.9941	38.3573	39.2609	40.0714	40.1104	39.7296	40.6803	41.1608	43.4087	45.0252	47.6807	50.5474	52.0089	52.5313	54.7621	55.3309	54.5718	54.4243	56.5473	57.3255	60.2465
	21.5288	21.3264	22.3578	22.1316	22.4053	23.1132	23.4736	23.2196	23.5579	24.4761	24.1918	25.0067	24.5785	24.6285	24.7753	24.7672	24.8415	24.1375	24.3374	24.866	24.6231	24.42	24.6568	24.286	25.2244	26.0327	25.1241	25.816	27.3523	29.3373	30.9893	31.7313	32.1919	32.4158	32.3012	33.0952	34.7143	36.3805	38.8863	40.6066	42.2757	43.8293	44.5821	44.8643	44.2844	44.1644	45.5374	47.0884	49.6409
	24.7727	24.3947	26.6991	26.2935	26.191	26.8079	27.4095	27.6727	27.8713	28.7441	29.1723	28.7736	28.9149	29.1787	29.6425	29.4871	29.4019	28.6692	29.417	30.1248	29.9439	29.7684	29.5601	29.6851	30.0352	31.5821	30.7961	32.784	33.6791	36.3458	38.6603	40.7419	41.4336	41.5616	42.1971	43.4786	45.3636	47.0843	50.4753	53.2399	54.2753	56.3405	58.7713	58.0381	58.1969	57.5183	59.2173	61.7456	63.369
	21.3456	21.8471	21.7032	22.4863	21.8527	22.9024	23.0162	23.1202	22.9434	23.6599	23.7086	23.6732	24.7635	24.2148	24.0456	24.6237	24.3829	23.5365	24.262	24.5396	25.4009	25.0621	24.2819	24.3666	25.6962	26.3082	24.8236	26.1825	26.3154	28.9346	30.0624	30.3684	30.1354	29.9077	29.3414	30.7467	32.0788	33.4644	36.0713	37.9579	40.2544	41.5041	42.5041	43.4622	43.1169	44.2899	44.9269	47.0698	49.2451
	40.6093	42.1809	42.6911	42.8121	40.9024	38.8615	38.8161	40.8277	42.4118	42.1675	39.489	38.7591	37.4961	39.1552	41.5928	41.7417	40.4839	38.1842	38.1015	37.9952	41.4095	41.1937	41.3406	39.3729	38.0273	39.0129	40.0353	42.4945	43.4174	41.6387	40.5326	41.5652	43.9367	46.1434	45.767	43.9572	43.5072	45.0181	46.8425	48.3395	50.5887	48.2475	47.4674	46.6883	49.7662	50.9545	52.5064	52.5009	49.8126
	30.8678	32.5273	32.728	34.2395	32.9343	29.4777	29.8567	31.914	33.105	32.9375	31.2857	29.32	29.1728	30.8226	32.2074	32.9764	31.5457	30.5772	30.1813	29.6771	32.2348	33.2705	32.0666	31.1067	29.0718	28.9664	29.8188	32.31	33.057	32.0492	29.9075	31.8401	33.1456	35.012	34.9068	33.4471	32.3802	33.9362	35.5105	36.9906	37.8709	37.4413	36.3858	35.0054	37.6697	39.2682	41.3623	40.6256	39.0708
	28.9758	30.5764	32.0351	31.778	30.935	28.0459	29.0143	29.945	31.4656	31.9811	30.0839	28.1704	28.8272	29.5603	32.0848	31.5856	30.8995	29.3296	29.0497	29.6496	31.7779	32.2896	32.8131	30.9021	29.6463	29.9738	31.4277	33.4879	34.938	33.8423	33.1578	34.1627	36.763	40.0707	39.4833	38.5756	38.4671	41.4569	43.8693	47.0702	48.6373	48.2393	48.181	48.9123	52.0407	54.9723	58.4043	58.3759	57.2275
	27.1249	28.1694	28.3725	29.4228	27.9408	25.89	26.0194	28.0108	29.1574	29.7752	28.19	26.9722	25.9435	27.9285	31.3137	31.6309	29.2504	28.3692	27.3803	27.5591	29.3498	30.3368	30.8113	28.7767	28.1397	28.9576	29.059	31.6723	33.4511	32.3756	31.6913	32.6796	35.1523	38.3243	38.4562	37.4611	37.7544	40.29	42.4559	46.2389	48.0414	47.3879	46.6591	47.0344	50.6444	52.5647	56.2121	56.6713	55.3913
	40.4563	41.7105	41.5825	43.0678	41.5755	37.6423	38.4702	39.3787	41.8139	42.2079	39.9236	38.7048	39.3384	40.7351	43.0608	43.7249	42.4124	41.445	39.9456	41.63	41.7826	43.0928	43.3867	41.7677	39.5961	40.4125	40.5993	44.5754	45.8246	44.1937	41.7313	44.1398	46.7621	50.8294	50.3534	49.008	49.6456	52.8127	54.6499	57.7454	59.4901	60.0869	58.8707	59.8216	63.5405	66.5343	68.6614	68.9549	68.1942
	27.1373	28.7926	29.0161	29.5089	27.5836	25.5034	25.2296	26.9347	28.3227	28.0139	26.7884	24.5676	24.8352	25.8736	27.4519	27.9196	26.7857	25.0701	24.1423	24.6921	26.5022	28.0976	27.6753	25.4616	24.1175	24.7088	25.1355	27.4587	29.0328	28.0061	26.3865	28.1862	30.1659	32.1971	32.7107	31.5775	30.238	31.6127	33.9519	35.8864	37.9512	36.6477	35.5638	35.5068	37.7486	40.4126	42.0447	42.679	40.4445
	24.4955	26.2999	27.0052	27.4106	26.5562	24.1825	24.6874	25.1405	27.0475	27.3047	25.5567	24.0162	24.1601	25.6334	27.6365	28.0357	26.9326	25.1019	24.6708	25.7925	27.0575	28.4823	28.6032	26.6444	24.7958	26.2324	26.6001	29.2025	29.8255	29.656	28.2236	29.5129	31.916	34.1747	33.9295	33.1193	33.3998	35.4416	37.3909	40.9928	43.0795	42.4955	42.3711	42.6076	45.991	49.3858	51.3931	52.0977	51.5234
	22.5972	25.2574	24.8647	25.5397	25.1996	22.5078	22.5624	24.259	25.2445	25.8333	23.7068	22.2354	23.9561	24.0258	25.5945	26.5626	25.2729	23.8559	22.9325	23.8519	25.4665	26.4513	25.805	23.6936	22.8801	22.8076	24.4595	26.2321	27.0805	26.7055	25.13	26.2566	28.2973	30.8273	30.967	28.7051	28.3951	30.0167	32.5818	34.572	36.1933	36.3844	34.8089	34.9828	37.4626	40.3957	43.1269	43.4185	41.8361
	30.8516	31.653	33.6986	33.2586	33.1512	30.1761	29.6733	32.6765	34.9583	35.2828	33.0189	31.4387	31.8268	33.7996	35.0435	34.8804	35.6532	32.7046	31.0906	31.7754	34.0244	35.0065	34.632	32.7874	31.9755	33.2157	33.471	35.888	37.1673	35.3086	34.659	35.7431	37.078	40.8646	40.1124	39.5105	38.588	39.3722	41.6101	45.1974	46.3222	45.4987	44.2759	45.212	47.9491	49.5426	54.1482	54.8365	52.5943
	32.9269	34.5869	35.4721	35.7475	35.2101	31.6715	33.3144	34.2628	36.0602	35.3876	35.0849	32.7848	32.8648	35.1439	35.9653	36.7479	35.3586	33.8287	33.3744	34.2345	36.4251	37.0215	36.6324	35.2564	34.2103	35.7306	36.3625	38.8663	40.8455	38.0568	37.1443	39.7114	40.6513	43.6331	43.4941	42.3727	41.146	43.6713	45.5352	49.0406	50.4002	50.1198	49.1361	50.2066	53.066	56.0496	59.6479	59.4984	58.662
	32.8019	34.9288	35.0518	35.9536	34.8507	31.8775	32.3683	33.6269	35.3641	35.556	32.735	31.4307	31.1877	32.7779	34.5662	35.4663	33.7845	31.9388	31.7415	31.7971	34.1431	34.6098	34.6469	32.3098	31.7349	31.8931	32.7871	34.4983	36.5462	34.9164	32.9526	34.3385	35.7008	38.0623	37.4835	36.0048	35.2223	36.7934	38.742	40.6564	42.2735	40.713	40.8672	38.9335	41.7202	44.1889	45.6745	46.4881	44.6958
	40.5726	41.2049	42.0056	43.1903	40.9815	38.871	38.8684	41.4497	43.0312	43.7999	42.0559	40.0367	39.0167	41.5297	42.5836	43.1119	41.9277	40.9595	39.2519	40.3973	41.7355	43.9038	42.9866	41.7606	39.9315	42.1769	42.1338	44.9391	45.4039	44.81	42.3624	44.4069	46.0196	48.2674	48.3366	46.2253	45.0945	47.4863	49.0244	51.8053	54.3749	53.6576	52.8777	52.8559	54.7311	58.0725	59.999	60.6451	59.8622
	20.2343	23.0925	22.9531	24.0101	22.2494	20.1527	20.5064	22.0768	22.9721	23.8885	22.2092	21.6937	20.5544	23.1863	24.2159	24.5476	23.4993	21.9012	20.9477	22.0462	23.6825	24.5076	23.8212	22.411	21.1097	22.0373	22.7797	24.3161	25.7554	25.1017	23.2618	24.7496	26.6862	28.9681	28.9943	27.7425	26.9661	28.7593	30.9963	32.7733	34.2573	34.3057	33.1529	33.5012	35.7119	38.4256	40.2485	40.6256	39.1908
	30.8118	32.3031	33.0171	33.8284	32.813	29.8671	30.9959	32.6833	33.6541	33.6381	32.7106	30.6173	31.1538	32.4176	34.4693	35.3739	33.8472	32.0721	31.92	32.0158	34.1725	34.6934	34.676	32.7056	31.2291	32.6951	33.4725	35.7088	37.6681	36.1791	34.2187	36.2686	37.9177	41.7753	40.6117	39.5827	39.0356	41.5897	44.3427	46.1379	47.7458	48.4481	47.2731	48.4151	51.3107	54.2398	57.4771	57.852	57.8154
	35.2486	36.8098	37.2925	38.1753	37.096	34.9281	34.8796	36.5625	37.6448	39.012	36.9842	34.9302	35.5647	36.5375	38.6606	40.0984	37.8675	36.2307	37.1322	37.5427	39.2478	39.961	41.2949	37.6591	36.6013	38.8973	38.9043	40.9822	42.3297	41.5029	39.8002	41.6308	43.4393	45.9037	45.9356	44.561	44.0804	46.1194	48.1013	50.8219	52.6367	51.9824	50.2784	51.6269	53.7966	57.1559	60.5097	59.9057	58.4867
	36.8408	37.9244	38.3225	39.9449	38.2799	35.2342	35.683	38.3661	39.5048	40.807	38.9892	37.2134	36.6488	38.3771	41.0614	41.754	39.9939	38.6623	38.1252	39.3462	40.4615	42.8614	41.7455	40.8781	38.8802	41.5225	41.6771	44.9196	46.5118	45.0304	43.2549	45.5982	47.2959	50.2942	51.1529	49.3114	48.1554	50.9258	52.3685	54.5603	56.6002	55.9435	55.176	54.3437	57.3775	59.051	61.9693	60.916	59.8143
	40.1573	41.8405	41.5952	42.63	40.829	39.1111	40.0495	41.769	43.9558	44.372	43.2527	41.2769	42.0545	42.964	44.4134	46.5276	44.395	42.8774	42.6733	43.9195	45.5963	46.8581	45.5874	45.2161	44.2225	46.7483	47.3803	49.4233	50.1733	50.099	48.0889	50.6709	53.6112	56.2842	56.3432	55.2796	54.5223	55.3548	58.8563	61.4509	64.0944	63.5555	61.6157	62.5112	66.383	68.2575	70.6249	71.4333	69.0226
	27.8971	29.419	30.1095	31.5752	29.8337	28.1692	28.4566	29.3636	31.9617	32.1503	31.0163	29.3553	29.2892	31.4139	32.8448	35.388	33.0862	31.0695	30.929	31.5784	33.0616	35.1158	34.6662	33.4992	32.198	33.9712	35.3433	37.9658	38.8466	37.593	36.9831	37.7096	40.297	43.1015	43.4908	42.5786	42.8926	44.2107	46.7061	49.3579	51.4657	50.6243	50.0917	50.4591	52.7384	56.2441	58.1567	59.4274	57.6444
	36.5432	38.7991	39.1596	40.0502	38.9205	35.4518	37.2498	38.3831	39.6738	40.04	38.6832	36.8191	37.104	38.7227	40.1497	41.6939	39.7768	38.5244	37.4781	38.3926	40.7195	41.9491	41.1803	40.8241	38.7611	40.6361	40.4939	43.4847	44.283	43.6411	41.1195	43.5453	46.3818	47.703	47.81	46.9408	45.789	48.1496	49.0862	51.0669	53.6278	51.5281	49.9428	50.9563	52.3549	55.8021	57.739	56.1029	54.7992
	35.222	36.6105	36.8	37.2863	36.8886	33.8131	34.7454	36.3307	37.8658	37.7431	36.781	34.3058	36.4356	36.8666	38.4061	39.6573	37.7844	36.2272	35.8709	37.0621	39.1172	39.942	40.0585	37.3284	35.6871	38.1912	38.6073	41.484	41.4379	41.372	38.9251	39.9205	43.9814	45.5984	46.4653	44.055	43.491	44.9359	47.0747	49.489	49.8547	50.2079	48.8052	48.9463	51.6975	53.8582	56.2245	54.9499	53.3859
	58.0913	61.6635	62.085	62.9314	60.927	59.1496	59.7153	61.2133	63.1005	62.5533	62.5401	58.9673	60.3707	60.3512	62.9505	64.9781	63.487	62.0357	61.9068	62.5232	64.9473	65.8567	65.8819	64.4778	62.3863	64.1637	65.1628	67.9816	69.8887	67.5636	67.3617	69.0571	71.8589	73.6549	74.4054	73.0939	71.3834	74.2032	75.3064	78.033	80.1105	79.0438	77.8543	75.202	77.3406	78.4619	79.2638	80.892	77.854
	40.7644	42.9816	42.9494	43.2046	44.9327	40.2206	40.155	41.186	43.752	44.7117	42.3913	39.2505	38.5582	42.2905	43.7504	45.7083	42.0177	41.3555	41.1872	40.2699	42.7287	45.2797	44.4261	42.9279	41.2202	43.6308	43.6973	47.1218	46.8766	47.2013	45.4355	47.1127	50.921	52.6651	52.5274	52.457	51.1895	53.0411	55.5196	58.0928	60.5775	60.5483	58.9057	59.7033	61.5113	65.0188	67.0236	66.6011	67.5847
	43.5143	46.1802	46.2515	47.6487	46.1563	42.9864	43.8727	45.5866	46.7461	47.3964	45.3797	43.6174	43.5356	45.0691	47.2128	47.8823	47.1414	45.2208	44.6586	44.8123	46.9699	48.6472	48.068	46.6258	45.4863	46.5941	47.3536	49.6769	52.0825	49.9547	48.6663	50.4351	52.5664	55.256	55.6255	54.1644	53.9653	55.8483	57.6073	60.726	62.1161	62.2589	60.7623	60.2805	64.3345	65.8374	69.6141	69.5991	67.3959
	28.3088	28.856	30.6117	29.9703	29.3565	27.2948	27.2957	29.6253	30.8313	30.9513	29.1351	28.5512	27.6942	29.308	31.143	31.8467	30.8483	29.0189	28.3387	29.0299	30.5125	32.4764	31.9828	30.571	28.5543	30.465	31.5214	33.9275	35.1711	33.6214	32.4898	33.7769	36.7203	39.1808	38.9561	37.987	36.4838	39.6597	41.4622	43.2202	45.9976	44.9339	44.2824	44.2047	47.5066	50.9793	53.7519	54.1566	52.2216
	36.2821	38.0028	38.3175	39.6022	38.0476	35.4455	35.4247	37.2776	38.7584	38.9784	37.4544	35.3586	35.93	37.3815	39.4343	39.9588	38.4589	37.163	34.4952	36.8197	37.835	39.8281	39.1049	37.6052	36.6134	36.8972	38.7552	40.0496	40.6714	40.1122	38.1092	38.9547	42.0694	43.4132	43.7593	41.2426	40.1506	41.2833	43.0291	47.1287	47.9143	46.7686	44.2774	44.0316	46.0825	48.3302	48.9618	49.0639	47.1099
	41.0556	42.7586	43.4878	42.9113	42.6852	40.4283	40.6485	42.4286	44.0785	43.7625	42.1914	40.5569	41.5704	43.0747	46.0361	46.5531	44.3787	44.1701	42.4207	44.0588	46.3778	47.0262	46.1263	45.1306	43.9328	44.1871	44.7425	48.0621	48.7012	46.5234	45.1614	46.8113	47.9658	51.3781	50.2613	48.4301	47.3574	48.4679	49.0769	51.8435	53.9347	51.9045	50.7788	50.0356	51.9235	54.1999	55.0595	55.3897	52.9407
	35.8466	36.9397	37.7775	38.4459	37.0952	34.9763	35.9933	37.2545	38.0422	39.1004	37.5538	34.9207	34.8902	36.3279	39.1334	39.2454	37.9931	36.0952	35.9301	36.5905	38.5925	39.7353	39.0569	38.065	35.7878	37.9661	38.2404	40.2847	40.985	40.2855	38.1007	38.8087	41.7846	43.5056	43.4838	41.2147	41.1157	42.0779	43.7355	46.0907	47.0858	45.9567	44.2747	44.0747	45.9281	48.5986	50.4812	50.3225	47.948
	39.2088	40.2974	41.0781	42.2589	40.8722	38.1202	37.749	39.768	41.1424	41.6443	40.184	38.9378	38.6754	40.2609	41.0894	43.22	40.7747	39.7293	38.8583	39.4652	41.0843	43.3259	42.4758	40.5903	38.9597	40.3322	41.1012	43.1081	45.6785	42.8776	42.8151	42.7056	44.8332	48.1098	48.7899	48.1062	47.8178	49.8266	50.583	54.4116	57.1386	56.3263	54.705	56.2866	60.5695	62.7189	64.2993	65.5076	64.5309
	26.7853	28.5509	28.8174	29.3102	28.4029	25.7012	26.2471	27.6577	29.7524	29.535	27.6405	27.1524	26.17	27.8673	29.3469	30.1783	28.5973	27.265	26.3349	27.3831	29.2568	30.9805	30.8428	29.561	27.9924	29.5846	30.2982	31.6034	32.8002	31.8008	30.7824	31.3581	33.4877	36.1817	35.7086	34.6415	33.7804	35.8369	38.343	40.5049	41.844	41.5748	40.72	40.1319	43.6031	46.6175	49.0301	49.0308	48.1902
	67.6216	68.5231	68.7325	69.5047	67.8221	65.0792	65.1056	67.3121	69.3684	69.6895	68.4987	66.7131	66.0845	68.1998	70.3144	71.4783	68.6807	67.5893	67.3559	68.1855	69.9284	72.2271	71.2905	70.7286	68.2278	70.465	69.1115	73.4396	74.6579	72.9423	70.5549	71.5904	73.475	76.259	75.9082	73.2979	72.7859	74.6513	73.6363	77.8708	78.6721	77.7043	74.7057	74.6933	77.048	77.9645	80.7888	79.5969	76.9324
	32.0018	34.7493	34.7192	34.7527	33.9881	31.6389	32.2456	33.2825	36.038	35.8144	34.9674	32.3057	32.8063	34.201	36.3669	37.6247	34.6782	33.6382	33.0105	33.2811	35.4808	36.6344	36.1421	34.2443	33.8678	34.2899	34.404	36.7959	38.4968	36.8884	36.3534	37.7658	39.5641	41.983	41.3848	39.3423	39.1479	41.4868	42.1557	45.1857	45.9302	45.2822	44.3182	44.1623	45.444	49.4089	51.0595	51.6327	48.3114
	47.4899	49.1102	50.3989	51.5556	48.9078	47.1205	47.0463	48.3507	49.9914	50.8714	49.4737	47.3154	48.0577	49.9334	50.5283	51.8303	50.3045	48.9399	48.0662	49.5337	51.3174	52.1423	52.8735	51.7723	49.2995	51.079	50.8274	52.5048	54.9986	53.5696	51.0073	51.4899	53.5222	55.7137	55.0519	54.52	52.7251	54.0438	55.5429	57.3324	58.7641	57.0365	56.2686	54.4954	57.2466	58.9392	61.2101	60.3698	57.5346
	32.6537	34.503	34.2964	35.2272	35.1994	32.4758	31.9594	34.0091	35.5895	36.6716	34.2608	32.966	31.9837	34.6747	35.8367	37.0467	35.8022	33.8107	32.6934	33.5167	35.9143	37.6985	36.883	34.3209	34.8058	36.6276	37.3773	39.8185	40.3433	40.0872	38.3284	40.2318	42.1173	45.3793	45.5379	43.3696	43.3087	45.4862	47.7686	51.8284	53.126	52.0735	52.0219	53.2114	56.0795	59.3133	62.5583	62.8438	61.7504
	54.8381	57.2606	56.5199	57.568	56.2816	53.664	53.5946	55.6044	56.6453	57.0707	55.7952	54.3214	54.1818	55.3538	57.8838	58.1658	56.1044	55.2897	53.8421	55.0889	57.2264	59.7231	59.0509	56.4007	54.7457	56.3549	57.1292	59.4772	61.1501	60.1832	58.9429	60.7074	62.8433	66.0403	66.9934	65.7097	65.7197	67.3932	69.3525	73.116	75.4933	74.9011	75.7088	76.2912	79.7371	83.7165	86.7439	87.1912	86.9983
	31.7958	33.7603	34.337	35.188	34.1071	31.4678	31.9372	32.644	35.6166	35.3603	34.4362	32.919	31.639	33.792	35.8487	36.0585	34.1586	33.46	32.7934	33.8178	35.6857	36.5641	36.8503	35.0471	33.6407	35.9982	35.1424	38.1407	38.2933	37.0077	36.1328	36.5639	38.6051	40.2263	40.3295	39.482	38.714	39.5422	41.3385	43.8099	44.6637	43.2909	42.3423	43.0257	45.4997	46.1992	48.7127	49.0306	47.3247
	41.1217	43.1985	43.1283	43.947	42.2622	39.2849	40.304	41.8158	43.4265	44.2499	43.5601	40.7057	41.1552	42.0922	44.5292	45.1224	43.8139	41.2757	40.688	42.5633	44.1852	45.7897	45.3238	44.4101	42.1611	43.5462	45.2926	46.9214	48.2608	46.6722	44.1333	45.7045	48.1047	49.8403	49.0621	47.2259	46.0077	47.4121	49.1279	51.2982	51.0597	51.4078	48.6475	47.8137	49.3077	51.4298	53.5819	53.6065	50.0844
	33.1833	34.7275	35.5535	35.4203	34.5061	31.8554	32.2352	33.5288	35.049	35.3533	33.69	31.8606	31.7913	33.1442	34.7489	35.3073	33.6703	32.7431	31.0217	32.1467	33.8517	35.9391	34.8131	33.4042	32.2696	33.3154	33.7688	36.9588	37.9238	37.3691	36.1195	36.821	40.2908	41.9422	42.2106	40.7396	40.3904	41.4415	44.1548	46.8328	48.1174	47.7819	46.7276	47.0327	50.2758	52.1122	54.5443	55.029	52.7715
	34.7048	34.7356	35.2848	34.4153	34.9165	34.3607	34.2908	34.3943	34.2273	33.9914	33.8003	33.315	32.9508	33.526	33.9033	33.3942	33.6521	33.5105	33.3432	33.0612	33.5343	32.6738	32.6701	32.23	32.8371	31.5814	33.1405	35.248	34.0236	36.6115	37.0271	38.2843	38.9811	38.872	39.0895	39.9834	41.1071	42.0514	43.915	45.3107	46.6814	47.4028	48.7106	49.2493	50.3091	50.1574	50.4947	50.6072	51.3678
	35.1897	36.1367	36.6422	35.0404	36.1383	35.3799	36.0233	35.2702	35.0085	34.9681	34.7166	35.1081	35.2324	35.3444	35.6292	34.22	34.8169	34.5642	35.3033	34.4674	34.1872	33.4578	33.7289	33.4742	33.613	33.3307	34.1079	35.749	34.0281	36.2986	37.8256	37.8036	39.4639	39.1008	40.1692	40.2566	41.2353	42.9272	44.6994	46.2101	48.2107	49.6198	51.0797	51.8733	52.7019	53.6694	54.0695	54.3594	56.1744
	44.8714	44.499	44.5417	43.589	43.1472	44.1302	43.8713	42.4772	42.9257	42.6776	42.8366	42.3553	42.7064	42.2664	42.94	42.2333	41.6371	41.9931	42.2563	41.8452	42.7054	42.6039	42.5335	41.3614	41.1462	39.0867	41.2272	42.9405	42.2656	43.7918	44.7083	45.7645	46.5844	46.5137	47.2696	47.0875	47.8801	48.8468	49.8623	51.6164	52.071	53.7145	53.742	53.9854	54.7865	55.6738	55.0681	55.4614	56.2827
	34.7244	34.3874	34.3437	34.0695	34.8245	34.095	34.6913	33.4653	33.9773	33.2925	32.774	33.6577	33.7209	33.6781	34.0312	33.6861	33.3788	33.809	33.3704	32.8975	33.5604	33.0511	33.6443	33.3002	32.6179	30.6734	31.0396	33.7137	32.4019	34.007	34.9016	35.9703	36.6503	37.369	37.6302	37.6944	39.3535	40.45	42.3562	42.1389	44.3583	46.1275	46.2632	46.9542	48.2517	47.7096	49.1003	48.7433	49.1848
	37.242	37.0859	37.377	37.3619	37.1695	36.7734	37.0332	36.9719	36.7039	36.5989	36.1639	36.7174	36.3305	36.981	37.398	36.917	36.5211	35.9329	36.8078	36.1291	37.0282	36.2416	36.358	35.8643	36.11	35.0452	36.2762	38.2873	36.9513	38.8139	39.1703	39.6325	40.3908	39.2982	39.832	40.2086	41.0026	42.3885	43.7606	44.468	46.3813	47.3995	48.3666	48.5215	48.7733	50.2066	50.7275	51.0207	51.4216
	56.762	57.0642	58.5405	56.6357	56.9919	57.4248	57.6271	56.9215	56.8618	57.0875	57.0401	57.1935	56.3563	58.2977	58.1482	57.6763	57.3386	56.8215	57.5295	57.2143	57.069	57.5668	57.4332	58.0467	57.6167	55.8264	57.7314	60.0492	56.7986	59.4492	59.5857	59.8045	61.4027	61.1437	61.5409	61.0248	61.6329	62.6429	64.523	64.8728	65.5391	67.3524	67.8074	68.5577	69.9911	68.939	70.068	71.0386	71.1048
	39.0648	39.377	39.5102	39.2754	39.3499	38.4843	38.9216	38.0687	38.6634	38.4519	37.9038	38.4023	38.6269	38.1796	38.5344	37.8955	38.1064	38.6531	38.6063	37.4668	37.7544	37.7203	38.1961	37.599	37.8626	36.5745	37.5151	39.4385	37.7615	40.3546	40.5789	41.8788	42.545	42.2012	42.8415	43.4871	44.4042	45.867	47.6364	48.3193	50.9457	52.5294	54.7418	55.4827	57.2337	57.5656	59.3977	60.3564	62.1839
	38.9946	39.5811	39.2717	38.8737	38.7869	39.0245	39.3621	39.1108	38.8911	39.2813	38.8189	39.4115	39.1157	39.3728	39.4828	38.7689	39.6518	39.1285	39.1925	38.8142	39.2158	38.582	38.5755	39.2342	39.6587	38.4886	39.9867	41.9324	39.709	41.9968	42.9399	43.8032	44.045	44.0017	44.4119	44.6924	46.0292	47.2691	49.2949	50.441	52.6819	53.499	55.5609	56.374	57.0021	58.0313	58.3531	58.7941	60.9829
	32.3517	31.9421	33.645	32.1858	32.7654	32.2956	32.6995	31.6722	32.4176	32.0495	32.0508	31.7831	31.6739	31.8063	32.3402	31.8432	32.1437	32.0314	31.9789	31.6003	31.4762	31.4902	32.686	31.2772	30.9025	30.0757	31.7048	33.4014	33.1355	34.5354	36.1069	37.3744	37.7292	38.439	39.1694	40.6438	42.1899	44.0607	46.8707	48.3177	50.398	52.0482	53.7682	55.0862	56.2438	57.9976	58.8191	60.5737	62.508
	39.4907	38.943	39.955	39.683	39.2524	38.8456	39.1286	38.9674	38.8373	38.9828	38.6836	38.2462	38.6534	38.5662	38.8949	38.882	38.788	38.2369	38.8384	38.6377	38.9061	37.7927	38.1546	38.1916	38.4413	37.4789	38.9055	41.3885	40.0545	42.3829	43.1626	44.3986	45.8173	46.4051	47.7761	48.5218	51.2045	52.441	54.8788	56.885	59.6559	62.0395	63.7912	64.9005	66.411	68.0341	68.4562	69.9959	71.6355
	36.0063	35.936	35.7867	35.6242	35.4109	35.251	35.4195	35.2693	35.2346	35.1609	34.9464	35.201	34.0048	34.8626	34.7203	34.4247	34.1166	34.3606	34.0776	34.1186	34.7169	33.5221	34.0882	33.7801	33.2829	32.4926	34.2995	35.9654	34.8	37.5232	37.9618	38.83	41.1904	41.2177	41.8221	42.8387	44.9748	46.6973	48.517	51.1374	53.1791	55.3445	56.5514	58.1164	59.9479	59.7466	60.7539	61.9075	63.4336
	30.6432	30.8619	30.7182	30.7875	31.3196	30.4863	31.6539	29.8211	30.0205	30.8778	30.3315	30.5432	30.5966	30.8874	31.6038	31.078	31.3704	31.7941	31.4644	31.4102	30.9608	31.2329	31.0031	31.2798	30.5615	28.9931	30.0039	32.5755	31.5335	33.9834	35.2243	37.1352	37.205	38.2404	39.724	39.6961	42.7277	44.3995	46.4646	48.4662	51.4389	52.5744	54.236	56.2766	56.8607	57.1139	59.1027	59.3264	60.9356
	37.9728	38.089	38.2369	37.3112	37.2972	37.2506	36.9883	36.7007	37.0072	37.0851	36.4771	36.6196	36.6414	36.5493	37.0911	36.4557	36.0112	36.5374	36.8786	36.2644	36.2316	35.6695	36.1233	35.4677	35.3779	34.2988	35.957	38.6422	38.2494	40.055	41.9898	43.8547	44.8471	45.4145	47.5882	48.2343	50.59	51.598	54.3503	56.5687	59.1471	60.797	61.6884	63.9786	64.8707	65.5307	66.8961	67.424	68.9255
	19.9968	19.7955	21.0948	20.3977	20.0521	19.8925	19.8626	20.1341	19.6251	19.8278	20.2515	19.8845	19.624	20.1533	19.5481	19.5394	19.8941	19.3814	19.656	20.0182	20.2394	19.5811	19.2517	19.6465	19.8356	17.428	18.8902	20.5644	19.2317	21.0375	21.7478	21.7133	22.6411	22.551	23.212	23.2316	24.2228	25.3033	26.936	27.6427	29.9534	30.7489	31.7599	32.5371	33.592	33.9305	34.3461	34.4082	36.2521
	33.2948	32.99	33.5439	33.3633	33.3776	33.205	32.9948	32.6206	33.0721	32.4961	32.6121	32.3665	32.9908	31.631	32.527	31.9185	31.3132	31.9345	32.0559	31.5332	31.6441	31.6775	31.7484	32.1338	31.1356	29.8508	31.3725	33.4027	32.913	34.6524	35.5803	37.2619	38.9148	38.3727	40.087	41.2555	42.7557	43.7667	45.6598	48.5207	49.4787	51.5658	52.4064	54.2076	55.4396	55.0684	56.2496	56.257	57.8593
	22.8889	23.1071	23.6839	22.911	23.0382	22.7513	22.7037	22.7057	22.9549	23.1193	22.8013	22.3709	22.469	22.7867	23.2168	22.6388	22.9204	22.1348	23.0648	22.2971	22.918	22.2722	22.3327	22.523	22.1205	21.0344	22.4476	24.3813	23.6101	25.5829	27.4624	27.6923	29.4424	30.3112	31.4127	32.388	34.1169	35.4533	38.278	39.6805	42.5777	44.3208	46.2578	48.0526	49.2595	51.4158	51.1294	52.8728	54.8884
	27.5156	27.8318	27.7844	27.4865	27.6168	27.0021	27.7437	27.3677	27.2123	26.937	26.9187	27.1381	27.4191	26.7651	27.6504	26.8531	26.8704	26.8235	27.0368	26.7726	27.0978	26.8675	26.7239	26.3425	26.401	25.143	25.9118	28.3925	27.247	28.9419	29.5671	30.2848	30.8927	31.4485	31.8709	32.6085	33.9546	34.8933	36.7316	37.9584	40.0056	41.3619	42.7496	44.113	45.1006	45.4885	46.2522	46.5898	48.264
	32.8106	32.579	33.4925	32.0311	32.9017	32.3562	32.2567	31.7337	32.1707	31.95	32.6495	33.1542	31.9862	31.8681	31.9693	32.0976	31.9142	32.2105	31.7	31.1736	31.2446	31.3558	32.5288	31.2119	31.9775	30.9454	32.0951	34.3105	33.3831	36.4846	37.1211	38.4019	40.6068	40.3805	41.3661	42.4193	44.6064	47.2138	49.068	49.6547	52.9629	55.2655	55.7796	57.4607	57.8164	59.2187	58.7909	59.388	61.2138
	22.5221	22.5444	23.0794	21.1171	21.4846	21.7483	22.0489	21.773	21.0127	21.7375	21.5161	21.6467	21.8063	21.7308	21.4261	20.7439	20.8832	21.5186	21.8498	21.0926	21.6079	20.6509	21.8373	21.3075	21.1079	20.8116	22.3386	24.7624	22.8989	25.6701	26.7364	28.0067	29.1492	29.4938	31.8327	32.0593	34.4222	35.5034	38	39.4408	41.3875	43.4483	44.3446	46.0534	46.583	46.2447	47.8085	47.9686	49.1044
	19.4077	18.8059	19.6858	19.4839	18.7638	18.9339	19.0407	18.9656	18.5798	19.0202	18.6023	18.6009	19.4139	18.6162	18.9644	18.1565	19.2033	18.2973	18.6267	18.2802	18.3639	18.1779	18.2951	17.911	18.2032	16.9138	17.982	19.9665	19.282	21.1517	21.7753	23.0922	24.1348	24.0025	25.7391	25.6386	26.7905	28.6194	30.2145	31.4988	33.8996	35.6133	36.7658	37.1877	38.4114	39.1099	39.5141	39.4861	40.7339
	28.6823	28.1994	28.1376	28.2064	27.9014	28.2721	28.6643	27.7353	27.995	28.5006	28.1591	28.3232	28.0909	28.1144	28.7641	27.948	28.1609	27.3669	27.7281	27.2487	27.8783	27.1254	27.6291	27.0482	27.3743	25.6122	27.0407	29.055	27.8876	29.7317	30.3889	31.3272	31.8731	32.104	33.1685	33.4127	35.08	35.5932	37.9156	38.7106	40.7	42.0161	42.3608	43.1901	44.9239	45.1059	45.4654	46.0673	46.6379
	29.5545	30.6149	30.3126	29.717	29.701	29.9035	29.9338	29.5312	29.6111	29.1579	29.6094	29.9965	29.6195	29.4959	30.0649	29.4801	29.3413	30.1401	30.2014	30.0962	30.4849	28.7325	28.9833	28.9469	29.9224	28.3451	28.912	30.9281	29.339	31.2083	31.675	32.6668	33.4345	34.2165	34.0904	34.186	35.7237	36.9825	38.887	40.692	41.7756	43.8322	44.0534	46.729	47.0048	48.4878	49.8967	51.1707	53.5826
	20.9287	20.9329	21.0979	21.2785	21.1777	22.0482	21.7876	22.1096	22.6103	22.3016	22.2524	22.1063	21.705	21.2063	21.3225	20.9203	21.0854	20.3712	19.99	20.5106	19.9472	18.8791	18.801	18.4368	17.6025	21.2544	21.229	22.3991	23.6167	24.9191	27.8739	28.8054	31.0514	32.6301	35.2559	37.3242	39.0813	41.7903	43.7619	46.3552	49.3106	51.5693	53.8063	56.4015	58.2704	61.1108	63.4625	66.7774	69.3445
	44.1678	43.3771	43.7103	43.5118	42.9083	43.8463	44.6069	43.6659	44.0983	44.4382	44.0981	43.2224	42.9994	42.4686	42.6668	41.8865	41.7886	40.9195	40.5334	40.8927	40.1136	38.5767	38.6313	38.1019	37.3831	39.0297	38.799	39.8859	41.1159	41.7298	43.591	45.9972	47.92	50.3395	53.4781	55.9781	57.931	61.3464	63.8767	66.2654	70.8763	73.6063	78.1816	81.3106	84.6046	88.1011	91.7852	95.1548	99.1805
	25.8367	25.5929	26.0625	26.2836	25.9694	26.9612	26.8697	27.0734	26.9173	27.8248	27.3591	26.9064	26.7985	26.93	26.2398	26.6214	25.7176	24.9796	24.4403	25.3129	24.9451	23.6006	23.4759	23.1119	21.9469	24.1635	23.8086	23.8189	25.7713	26.3635	30.4799	29.5853	31.4189	33.8403	36.1953	38.5044	40.3253	43.2072	45.8069	48.9834	51.758	54.847	58.688	61.2105	64.5082	67.9229	71.0487	74.8487	77.8345
	28.9931	29.2601	29.6722	29.6522	29.4354	29.423	29.3649	29.5698	30.3276	30.0734	29.9622	29.4152	29.1527	29.8891	29.2389	28.6396	29.2207	27.2946	27.0581	27.2949	27.3915	24.9802	26.0311	25.3928	24.8012	29.2714	28.5995	29.6368	29.2295	30.6529	40.1907	35.7436	36.4082	40.1897	41.6307	44.3622	46.2361	47.9873	52.0351	53.0688	57.1601	60.1913	65.756	68.5063	72.5753	75.992	79.1791	83.1405	86.4128
	34.237	32.9539	33.6318	32.811	33.6921	34.028	33.9594	34.6997	34.6888	34.4772	33.9914	33.3728	33.3213	33.0522	32.8516	32.5926	32.3944	31.6949	31.8177	32.446	32.125	30.2836	29.7687	30.2769	28.9853	30.5611	31.1834	32.1154	34.9422	37.044	36.6605	42.6785	44.5769	48.2931	50.5148	54.1711	58.4623	61.6264	64.6922	68.8013	73.4958	75.7647	80.3527	84.532	87.3618	91.3557	96.2943	99.5236	104.752
	21.3639	20.0437	20.8208	21.0445	20.8708	20.633	21.6488	21.3834	21.7822	22.115	21.4559	21.3324	20.9946	20.9049	20.9168	20.9069	20.4515	20.1201	19.1203	20.0586	18.9385	17.6012	18.4455	18.154	16.966	21.0355	21.0115	21.1058	22.2229	22.3688	26.234	25.1832	27.0682	29.107	30.2843	32.6558	34.2031	35.5579	38.2904	39.9768	42.9613	45.5995	47.3735	50.3501	52.0393	55.2862	58.3137	60.9067	63.7907
	23.54	23.6358	22.999	23.9786	24.5568	24.7028	24.8031	24.5598	24.4854	24.9343	24.9456	24.581	24.5942	24.7962	24.1163	23.9627	23.4656	23.6405	22.3557	23.1236	22.5931	21.4557	21.8591	21.3013	20.8167	23.2108	23.6251	23.2953	24.7514	24.8929	28.4636	27.7734	29.9561	30.4518	32.9892	34.1989	36.7401	38.4702	40.8014	43.1757	44.0579	47.3052	49.9435	52.8763	54.699	57.6193	59.9526	63.8157	65.6397
	23.4011	22.4709	22.9865	23.3003	23.4549	23.9638	24.536	24.5562	25.151	24.9639	24.8786	24.7877	24.2481	24.4149	24.4049	23.4667	23.6776	22.8639	21.8756	22.148	21.7194	20.993	21.0494	20.6163	19.9593	21.9998	22.9455	24.3402	25.8733	27.5146	28.341	30.6714	33.6769	35.6902	38.3569	41.2505	44.2703	47.3475	49.611	53.0101	55.1557	58.1714	60.9817	63.517	65.6685	67.9762	71.3629	74.2636	76.6033
	26.1117	25.7342	26.4065	26.5434	26.9719	26.7612	27.7839	27.5699	27.5473	27.4724	27.5674	27.5804	26.2973	26.5884	26.4887	25.8742	26.2278	25.2343	24.6528	25.631	24.8254	23.9548	23.6437	22.8933	22.3606	24.7129	25.5635	27.4707	29.8791	31.142	32.5688	36.9227	40.8934	43.338	46.6849	49.6999	52.8273	56.2592	59.1789	62.2393	65.698	69.371	73.6153	77.1033	80.0872	83.2878	86.745	90.5456	93.1301
	25.083	24.2285	24.7906	24.9447	24.7634	26.3746	26.2728	26.717	26.6367	27.2734	26.7066	26.5268	26.2236	25.4715	25.6277	25.8685	26.3523	26.2379	25.1376	26.6329	26.1521	24.5586	25.0021	24.0244	23.1645	25.9823	26.4988	28.322	31.0764	32.3612	35.1942	37.8033	40.1614	42.8153	45.1892	47.9467	50.5011	53.5877	56.2443	58.5282	61.6373	64.585	67.2089	70.5114	73.18	76.3335	79.2704	81.52	85.0821
	34.2209	33.071	33.3208	33.294	33.5812	34.2091	34.645	34.831	34.7244	35.0409	34.0467	34.5878	33.6214	33.969	32.9853	33.2449	32.8727	32.2317	30.8035	32.4635	30.9472	30.4579	30.6602	29.924	29.1579	32.0667	32.9886	34.8078	37.8742	40.1645	45.1057	46.7191	49.0215	53.4721	56.829	60.2849	63.2781	66.2578	70.6264	73.9519	77.9193	81.8431	86.3483	89.9456	93.5924	96.1783	101.595	105.099	108.559
	54.1601	52.0086	52.7705	52.8073	52.5547	53.373	52.5832	53.2021	53.1488	52.6048	52.6586	52.146	50.8432	50.934	50.4172	50.0521	50.9556	48.7879	49.0126	50.4709	49.2154	48.0528	48.6911	47.1016	45.404	49.8629	51.5654	53.6939	58.15	59.6251	66.7103	69.881	72.6587	76.7856	80.9718	85.3424	90.0608	94.3376	99.339	103.011	108.567	113.369	116.837	121.362	123.711	127.464	133.668	137.704	142.157
NS shRNA +STIM1	25.382	25.8283	26.295	26.3961	27.2451	28.2614	28.5731	28.5963	28.6669	29.4096	29.2511	28.3938	28.9949	29.8936	29.8698	30.277	30.0486	30.1811	30.006	30.3824	29.9136	29.2831	29.0603	28.51	28.5546	30.9189	31.4575	30.9452	31.2158	31.7681	31.7721	32.6689	33.9062	35.9848	38.6233	40.5157	42.2753	44.6173	46.8432	48.9083	50.9411	52.4848	54.4062	56.5148	58.1117	59.8718	61.5743	62.9991	64.8986
	32.0951	32.3452	33.334	33.0124	33.8122	34.9969	35.7632	35.7205	35.909	36.3535	36.1171	35.397	36.204	36.4875	36.7805	37.0183	36.792	37.1071	37.3666	36.8776	36.7398	36.0579	36.0497	35.1966	34.9141	37.2616	39.2808	38.7076	39.5895	40.8167	42.4665	43.7876	45.7284	47.9673	51.1451	53.2304	55.2823	57.5783	60.4083	61.5336	63.6811	64.81	66.9716	68.9813	70.7281	72.5931	74.044	75.3969	77.1692
	53.0154	52.8296	53.2959	53.6094	54.377	55.7835	56.1483	56.1621	55.9432	56.5894	56.3283	54.8028	55.9703	56.5107	56.5279	56.7141	56.5185	56.4026	56.4133	56.2846	55.523	54.995	54.4897	53.7154	53.4003	57.5424	60.2391	61.1052	63.6129	65.4634	68.1208	70.9996	74.0171	77.7157	82.2985	85.9888	89.5313	93.2609	97.4852	100.307	103.54	106.553	110.156	113.964	117.43	120.595	123.656	126.704	129.757
	55.1143	54.9417	54.2064	53.353	53.2465	52.1127	51.6219	52.2279	52.9027	53.671	55.1679	54.4111	54.262	54.2922	55.1068	55.5081	55.4853	54.4647	55.0292	56.0656	55.9082	55.4548	55.7849	56.7256	56.2211	48.1791	47.9378	49.4405	49.3131	51.2617	54.0089	58.775	59.3282	62.6536	67.2728	72.4287	75.4263	76.2201	81.1852	84.4864	88.4137	91.8115	97.2099	99.9058	101.593	103.706	104.404	105.953	108.692
	36.9868	36.3683	36.212	35.2565	34.9648	33.955	32.8443	33.4929	32.2749	33.345	34.1835	33.9028	33.9955	33.9844	34.6484	34.2825	34.7228	33.8371	34.0944	34.5192	35.0126	34.6886	34.8918	34.9945	34.92	29.4235	28.5115	29.4245	30.1787	32.4408	34.9919	37.7261	38.9529	41.8544	45.5828	49.8549	52.3254	52.6215	56.8483	59.5787	63.6533	66.3078	71.0278	73.5124	75.2696	77.6725	79.4531	80.6067	83.2943
	50.3015	50.2793	49.7999	49.3405	48.5931	47.7283	46.9466	47.7213	47.5121	48.3146	49.4125	49.3533	49.455	49.4171	50.0246	50.6858	50.8874	50.1365	50.0728	51.1322	51.0423	51.5667	51.3316	51.4979	51.1889	46.1838	46.3443	47.5239	48.8106	51.6138	54.52	58.6664	61.1266	64.5561	69.8998	75.3408	78.851	79.8837	84.5292	88.4714	92.5264	95.4208	101.257	102.919	104.48	105.178	105.976	106.483	107.318
	35.6247	35.6133	35.7343	35.1471	34.5733	34.188	33.4785	34.3479	33.9098	33.9196	35.4598	34.3423	34.9993	35.2764	35.8289	36.046	36.1614	35.422	36.0126	37.0247	37.3798	37.4958	37.1623	37.5944	37.9109	31.4834	31.0912	32.0699	32.0906	34.306	37.1418	40.6963	41.3565	43.6421	47.4153	51.1597	53.4468	53.623	57.0945	59.7252	62.8399	64.9725	69.1811	71.0275	72.0909	73.8373	74.7883	75.1945	77.3815
	45.104	44.8607	44.4968	44.3272	43.5853	42.1663	42.0001	41.8955	41.8457	42.8675	44.1961	44.3177	44.0668	44.2193	44.9102	45.1845	45.4695	44.7544	45.3542	46.1557	45.9947	46.0211	46.074	46.2226	46.6771	40.9125	40.7947	42.7805	44.9811	48.9103	54.0919	59.7162	63.5606	68.3635	75.2728	82.2553	87.2096	89.4704	96.3062	101.565	106.802	110.858	117.482	121.09	123.357	126.402	127.835	129.525	132.11
	15.9144	16.1778	16.2177	15.6216	14.9352	14.227	13.3557	13.8059	13.9988	13.7182	14.7784	15.2974	15.0462	15.3851	15.7581	15.9342	16.1976	15.2579	15.5694	15.9856	16.2711	16.1886	16.1874	16.7366	16.189	11.3925	11.2898	12.5549	12.4148	14.1293	15.8668	18.9386	19.8935	21.5243	24.7347	28.0862	30.1599	29.6826	32.8995	34.9802	37.5605	39.2953	43.1584	45.4873	45.9306	47.7911	48.7945	49.5859	51.5375
	24.7943	24.4758	24.4466	23.0551	22.9028	21.8735	21.4467	20.9838	21.4014	21.2744	22.3821	22.6733	22.7385	22.5772	23.2795	23.217	23.5276	22.2874	22.8329	23.7131	23.3463	24.288	23.8584	23.8299	24.1868	18.714	19.3681	21.3173	21.8122	24.0636	27.7862	31.8511	33.5535	36.7542	42.3143	47.5677	50.4107	52.1068	56.6837	60.3947	64.6832	67.6784	73.4857	75.9918	78.3347	80.6541	82.6142	85.4488	87.3276
	11.8202	12.0309	12.278	11.3936	10.5764	9.91471	9.5415	9.59156	10.1914	10.8535	12.3213	11.9059	11.6357	12.4338	12.2884	12.8344	12.6229	12.1358	12.4659	12.5764	13.7185	13.5265	13.7421	13.7574	13.6864	9.28766	9.43906	11.4432	12.1654	14.2342	16.5334	19.4189	20.6286	22.7137	26.4645	30.4982	33.0006	33.9125	38.6318	40.8198	45.0937	46.8424	52.4733	54.5614	56.03	58.6144	60.3203	62.3415	64.6368
	29.0061	28.7532	28.8008	27.9244	27.3871	26.7555	25.8465	26.3379	25.7548	26.3672	27.2232	27.2248	27.5226	27.7043	28.1712	28.0827	28.3825	27.8983	27.6879	28.3264	29.3143	29.3828	28.8247	29.4542	29.5491	24.2326	24.1188	24.9319	25.1615	27.4372	29.8291	32.8074	34.2017	36.1001	40.1672	44.5963	46.8602	46.7899	51.0392	53.5487	56.9246	58.9112	63.516	66.0133	66.9602	69.4131	70.6544	71.8727	73.4484
	41.904	41.9976	42.9691	42.2252	42.4913	44.5425	43.1196	43.7693	43.4513	43.7427	45.7126	44.1526	44.9517	44.7774	45.2825	46.1592	47.3596	46.0748	46.8378	46.5165	45.9428	47.6841	47.1406	46.7962	47.494	46.6452	48.4544	50.1126	51.3965	55.1556	58.0693	61.68	67.355	71.3672	74.0271	78.5472	83.1928	87.2624	92.3531	95.7969	100.369	103.658	108.303	111.873	115.505	119.057	123.554	128.287	132.422
	49.2271	48.7172	49.958	49.8443	49.4358	51.7441	50.1664	50.5889	50.1295	50.9751	52.1886	52.1694	51.6854	51.7128	52.5355	52.9518	54.9352	53.2759	54.2438	53.4138	53.7571	55.531	54.2177	54.3811	56.1287	53.7301	55.1902	56.7257	61.4184	65.0593	67.9138	71.0026	76.4656	79.9692	82.3069	86.7543	90.6172	95.0575	99.1942	103.521	106.705	109.768	115.326	118.138	121.659	123.716	128.661	133.741	137.452
	24.3357	23.6898	24.4414	23.9742	24.2158	25.6717	24.957	25.4173	25.3183	25.9124	26.8482	26.6805	26.4365	25.8327	26.7014	27.0978	28.0904	27.2661	27.5708	26.7301	27.3604	27.6921	26.9457	27.4502	27.4998	24.4133	24.6182	25.3648	27.256	29.3612	31.3203	33.4469	37.2578	39.6343	41.0953	44.3139	46.2381	48.8412	51.8475	54.9817	57.8587	59.8666	62.7966	65.0835	67.7851	69.72	72.2499	75.8459	78.2436
	30.2552	29.9731	30.366	30.1282	29.8479	32.2321	30.4449	31.6848	31.0405	31.7504	33.2109	32.7874	32.1098	32.6879	32.9934	34.1544	34.9249	33.1359	34.416	33.6549	34.4578	34.3734	33.9381	34.2192	34.8065	33.4676	35.0515	35.7827	36.8359	39.9397	41.0611	43.2474	48.1502	51.2283	53.9786	57.4723	61.0895	65.5177	68.8782	72.9654	77.9001	80.3073	85.4358	88.3684	92.1846	95.8517	99.1816	103.482	106.926
	30.0295	29.1997	29.7687	30.0571	29.4531	31.3712	30.3811	31.0953	30.8735	31.3197	32.7195	31.8295	31.9484	31.9864	32.4587	32.9909	34.374	32.9083	33.8181	32.6361	33.5038	34.2506	33.1246	33.3028	34.3414	32.7206	32.6574	33.8759	33.4426	35.5135	36.8612	38.5032	42.6973	45.2022	46.4226	48.9529	52.3088	55.289	58.4913	62.2897	65.4266	67.5848	72.0592	74.6799	77.5926	80.7392	84.7296	88.7818	92.3419
	35.1684	35.191	36.3183	35.3528	35.7331	37.9323	36.8108	37.8608	37.4165	38.2754	39.3773	39.4146	38.4383	39.0289	39.844	39.9668	40.9688	39.9801	40.5954	39.9919	40.4993	41.5553	40.509	40.7477	41.8814	39.4435	40.0287	41.163	42.1395	44.351	45.9594	47.4915	51.1951	53.4939	55.1569	57.7431	60.5386	63.8598	67.1346	70.2863	74.3735	76.4156	80.4091	83.1089	85.8085	89.2582	92.7174	96.7541	100.445
	17.234	16.7527	17.3669	16.8926	16.7103	18.7173	17.4488	18.4375	18.0741	17.9423	19.4057	18.9032	19.3018	18.7003	19.6912	20.051	21.1692	19.9057	20.4645	19.3836	19.9583	20.3652	20.0566	20.1144	20.2957	19.7139	21.1211	21.3875	22.5203	24.6697	26.7003	28.4887	33.2586	35.2979	37.6329	40.631	43.5159	46.6059	51.1299	54.4528	58.1456	61.0258	64.922	67.5166	71.1972	74.5827	78.4718	82.8075	85.9471
	54.2344	54.2141	55.424	54.0375	55.4013	56.6137	56.281	57.6751	56.5301	57.1314	58.6983	58.1857	57.9606	57.9322	58.7854	59.3522	60.5603	58.9011	60.0836	59.2491	59.978	61.3473	60.624	60.5604	62.0628	60.5052	62.3033	64.6386	68.4174	72.3479	75.2606	78.9874	86.5819	91.3089	96.5754	101.421	107.765	113.362	118.523	125.285	130.67	135.576	143.73	147.288	154.203	158.243	164.628	171.444	177.819
	42.3357	41.8398	43.3221	42.4972	42.8336	44.7687	44.2565	45.0707	44.6035	45.3371	46.6581	46.4072	45.8234	45.9169	46.9072	47.5033	48.9298	47.3577	48.1832	47.2509	47.5378	48.1715	47.8611	48.2109	49.089	47.0309	48.5212	49.642	51.5194	52.8482	54.1176	55.4959	60.3059	62.8807	64.6817	68.1301	71.1067	74.9127	79.7371	84.7632	89.3454	92.8884	99.4825	102.437	107.507	112.424	117.551	123.501	128.041
	14.1776	14.6551	15.0909	14.6716	14.6677	16.3752	15.7201	16.215	15.9976	16.3987	17.4576	17.4978	17.5498	17.4928	17.8939	18.5131	19.3811	18.388	18.6512	17.9108	18.1448	18.5315	17.9731	18.0323	18.3564	16.1575	16.3685	16.7967	17.4742	18.7672	19.5265	20.7186	23.6349	24.9614	26.3433	28.7595	30.8962	33.5632	36.2839	39.1265	42.182	44.126	47.4374	49.337	52.2599	54.7328	57.5606	61.1839	63.6257
	50.0947	49.9649	51.0357	49.8671	50.6381	52.4774	51.2613	51.8898	51.4625	53.1824	54.9234	54.6202	53.9596	54.2759	54.7488	55.4653	56.3411	54.4553	55.4507	53.8185	55.2123	55.5097	54.6679	54.7882	55.31	52.9054	53.4938	53.5944	56.8051	58.4574	59.2104	60.3288	64.7022	66.1069	67.26	70.1999	72.6846	75.4661	79.0117	82.7428	85.7893	87.8384	92.3181	94.4995	98.3981	101.073	103.799	108.488	111.487
Time(s)	0	2	4	6	8	10	12	14	16	18	20	22	24	26	28	30	32	34	36	38	40	42	44	46	48	50	52	54	56	58	60	62	64	66	68	70	72	74	76	78	80	82	84	86	88	90	92	94	96
[truncated: 262 more columns]
