# Supplementary material for: Regulation of store-operated Ca2+ entry by IP3 receptors independent of their ability to release Ca2+
Source: eLife journal article supplement (doi:10.7554/elife.80447), 2023-07-19
Supplement: fig2-figsupp3-data1 [file Figure 2- figure supplement 3 source data 1.xlsx]

## Sheet: Panel B
HEK NS shRNA	13.8963	13.3457	14.1098	14.6748	15.281	18.1825	17.4621	16.1158	14.4098	11.7206	9.04746	8.10492	8.61416	13.416	14.3677	13.2274	11.5186	10.5033	7.91814	9.04789	17.3292	13.01	12.4284	14.039	13.7594	57.6946	58.4233	62.2276	67.2115	70.7211	70.5594	78.3732	77.5431	86.9148	77.097	94.8409	94.0367	90.8219	99.1444	102.123	104.006	108.612	106.741	116.783	116.078	118.924	120.942	117.001	123.062
	10.2147	9.38464	9.77137	10.3148	10.4419	13.6629	12.2703	11.8592	10.0145	7.17468	4.33424	3.81065	4.10815	8.20838	8.81143	8.21546	7.04375	5.69196	2.1342	4.45452	12.3306	7.49839	6.04053	8.69706	7.92184	13.5179	12.3816	14.7204	17.9083	19.7748	19.2767	24.9795	22.8669	31.0313	22.305	38.0067	36.0566	33.9059	39.8989	42.797	44.072	48.3452	46.2445	56.3827	56.3435	59.1922	62.4698	59.7411	64.5504
	12.3065	11.6889	12.3771	12.8319	12.9311	16.5651	16.1913	14.1319	12.4101	9.38586	6.59476	6.33233	6.16482	10.3371	11.3465	10.3783	8.88372	8.14467	5.02594	6.10053	14.4248	9.89757	8.46601	10.8043	10.4293	15.9466	14.9582	17.1679	20.0113	21.6347	21.8768	28.2353	26.137	34.1761	25.2038	41.7432	40.8991	37.143	43.4439	46.517	47.9756	51.5018	49.7524	58.9267	58.2723	60.25	62.3584	59.0991	64.3952
	15.9028	15.7434	16.4959	16.8513	17.5172	21.0039	21.0366	18.1082	16.8189	13.7297	10.3836	10.5726	10.3509	14.9524	15.9868	14.5752	13.5999	12.299	8.5756	10.4281	19.5383	14.4822	13.2827	15.39	14.9022	12.0195	10.7712	12.6238	16.1806	19.0767	19.535	24.0267	23.9412	31.8842	23.2983	39.7511	38.5004	34.9087	41.7534	44.2719	45.9013	49.6132	48.5262	57.5868	56.6654	59.1631	61.2686	59.0867	64.1682
	20.7746	19.5012	20.3357	20.9273	20.564	24.5048	25.5027	22.6126	21.2859	17.619	14.5968	14.3169	14.5597	19.2293	20.4199	19.1401	18.1407	16.8644	12.8781	14.8499	23.731	18.8038	17.8816	19.78	19.6384	23.4959	23.0619	25.5036	29.7481	32.2736	32.3539	38.811	36.9179	45.4554	36.3215	53.1113	51.9557	48.7898	55.8434	58.8735	60.0419	64.5445	62.0227	71.8822	71.1233	73.4658	76.9174	71.4395	78.3144
	19.4025	19.2992	18.9486	19.688	19.9119	23.1696	22.9475	21.7187	19.8465	16.7799	13.4713	12.7362	13.122	18.0847	18.5319	18.1543	16.7429	15.4423	11.7662	13.6527	22.268	17.6766	16.2146	18.8548	18.4784	20.3414	19.5331	21.1861	24.6772	26.0965	25.5813	31.1842	29.3415	36.8642	27.4105	45.3784	43.8179	41.3188	48.1294	50.9452	52.6203	57.4574	56.0948	66.2773	66.2204	69.2621	71.9337	68.6322	74.8018
	19.3012	19.172	19.5177	20.3983	20.2079	23.864	23.1773	22.0363	20.0362	17.4416	14.4421	13.1074	14.1009	18.5528	19.4515	18.6736	16.8704	15.9755	12.5505	14.0073	22.6703	18.0554	16.4086	18.9974	18.7246	23.0541	23.0987	24.1084	27.721	29.624	30.1274	35.771	34.1219	42.5308	34.0763	50.1065	49.1682	46.4417	52.6275	54.9243	57.7889	61.7551	59.5672	69.0217	68.9886	70.7373	73.2199	69.6495	75.9344
	14.0427	13.8563	14.0407	14.346	14.9277	17.901	16.8219	16.3507	14.8898	11.4228	8.54072	7.75986	8.22859	12.8657	13.1734	12.3066	11.2679	10.3153	6.67082	8.17101	16.463	12.0008	10.8854	13.2905	12.4134	17.9147	16.6991	18.0947	21.8848	22.956	22.9186	28.738	26.0495	33.9375	24.9834	40.4747	39.5788	36.4896	43.7314	45.5052	48.8158	52.9326	51.3709	60.877	61.121	63.903	66.3829	63.6254	70.317
	13.6344	13.1423	13.7381	14.3485	14.473	17.675	16.7848	16.2785	14.7094	11.2924	8.42164	8.27267	8.27662	12.5471	13.3936	12.747	11.2183	10.1725	6.71734	8.54191	16.5455	12.4479	11.3318	13.6191	13.5163	18.9673	17.9362	18.9799	22.2686	23.6024	23.7921	28.4056	26.2437	34.178	24.751	39.9338	38.7671	35.55	42.0111	44.3942	45.3675	49.3939	47.8508	56.013	56.7043	58.6654	61.7417	57.8281	63.8157
	14.4667	13.9063	14.9396	15.1455	15.2819	19.1471	17.527	16.9721	15.3229	11.6302	9.33291	8.69771	8.75406	13.3913	14.3218	13.8029	12.3355	10.9566	7.7021	9.11062	17.8063	13.072	12.1098	14.2548	13.8071	15.1591	13.9883	15.6953	18.51	20.2044	19.88	24.5592	22.7864	30.524	21.9762	37.5612	36.3705	33.7214	39.6764	41.9198	44.0538	48.3997	46.6864	55.6379	55.8849	59.1374	61.9401	58.5128	64.4192
	18.0463	17.6521	17.962	18.3218	18.503	22.02	20.5635	20.0575	18.2644	15.5691	12.4353	12.4164	12.4899	17.0636	17.7512	17.2013	16.0411	14.7275	11.1397	12.8628	21.9399	16.5119	15.6015	17.4329	17.9456	19.1307	17.9968	20.0907	23.5176	25.3501	25.2065	30.7129	28.7966	36.9633	28.593	44.896	44.0452	40.9156	47.212	50.5431	52.0711	57.8508	55.9223	65.9161	65.1748	68.5847	70.64	67.7721	73.384
	12.9398	12.2715	12.7303	12.7633	13.2603	16.9602	14.8585	14.9872	13.0743	9.54199	7.45719	6.42035	7.06704	11.5459	12.6405	11.9145	9.91432	9.54411	5.68881	7.0145	15.8224	11.442	10.2922	11.4992	12.4957	13.8646	12.0388	13.3825	16.2352	16.4636	16.3379	20.7584	19.025	25.2598	17.0281	30.1723	28.4368	25.3454	31.2921	32.4521	33.2739	36.6876	34.9525	42.749	42.52	43.6506	47.0225	44.0869	49.4282
	24.8574	27.2552	23.2452	24.7735	23.8278	26.1212	25.0554	24.468	27.2032	23.5358	21.4478	24.0942	23.9537	21.7831	27.293	26.7964	22.1868	24.5888	24.7894	31.4744	28.3087	28.9746	27.9183	28.5749	28.0884	30.021	32.9891	35.3077	37.9851	38.2608	41.2611	47.1153	49.638	50.8289	54.0977	59.0666	62.076	65.8437	67.4446	70.081	74.2649	77.828	79.974	81.9215	82.2052	85.9706	85.6381	84.4059	87.0396
	34.4252	36.1011	31.8042	34.0825	31.742	35.4203	34.331	31.7798	35.7583	32.7235	31.0345	33.5718	33.1932	32.5503	37.2452	35.3654	31.7871	33.5613	32.7211	40.0202	36.2393	37.7901	37.0949	37.8804	38.1428	42.0783	46.0526	48.0081	52.4313	54.7525	60.247	64.1062	70.7337	72.8222	77.6734	82.6694	85.5598	90.0563	91.5752	92.7399	94.6494	95.4944	96.6548	99.3731	100.804	104.37	102.413	102.197	103.724
	22.9583	24.9935	21.5196	22.7148	20.8841	23.9084	23.4903	22.3658	24.6506	21.8174	20.157	22.998	22.4268	21.3188	25.7053	24.6223	20.9736	23.1376	22.9735	30.9899	27.1463	27.7828	26.8056	27.3388	27.0354	30.7722	33.3272	35.4474	40.2004	41.4753	44.7987	49.3177	53.075	54.8866	60.815	62.7734	66.0674	70.7997	73.2652	79.6795	87.3958	92.3035	95.7205	98.9148	101.119	104.923	106.29	105.489	106.93
	15.0485	17.5347	13.1514	14.5013	13.0259	16.6308	14.5859	13.9114	17.1029	14.0266	12.9515	15.7147	14.8223	13.2038	18.1231	16.486	13.3848	15.3916	15.5395	21.9188	17.675	19.1444	18.2962	18.747	19.3234	23.0338	25.5475	27.1722	31.2942	32.0818	35.5234	40.5057	44.5228	45.6026	50.0578	54.5899	57.5254	60.7732	64.3575	68.5413	73.8742	77.6571	80.4942	84.7357	87.8524	90.8634	92.7009	93.4177	96.806
	27.0075	29.8677	26.2447	26.5385	25.5144	28.4611	26.812	26.9281	29.3671	26.7806	25.1305	28.3719	26.8872	25.8753	30.8905	29.7832	25.6789	27.7263	28.0326	35.0929	30.8647	32.3925	30.8594	31.8075	32.1227	34.3374	37.8818	40.3565	44.3117	45.3265	48.9246	53.9112	57.7052	57.8246	62.8459	66.3633	69.0021	73.1424	74.1474	76.3544	80.6834	84.3611	85.8341	87.6768	89.5102	92.1746	92.8791	93.2605	93.8645
	37.3814	39.6634	35.4019	36.346	34.7636	39.1027	37.3485	36.3852	39.3985	35.8501	33.1524	36.3387	35.75	34.8044	39.8357	39.2795	33.8158	36.6342	37.0665	44.8279	41.2911	41.5479	39.9894	41.3888	40.5879	45.3564	47.8099	49.9357	55.0583	55.8988	59.8367	65.5118	69.3807	71.0972	76.7941	78.8664	81.1352	85.6347	87.0583	88.2506	93.0719	94.6028	95.7217	97.1639	98.235	100.669	101.653	101.467	102.548
	17.5611	18.9928	15.7914	16.6178	15.7901	18.5096	17.2392	16.685	18.6737	16.0609	13.8438	16.6966	16.2132	14.5569	19.202	18.4472	14.1288	16.2822	16.8899	24.4311	19.8974	22.1309	20.6846	20.6947	20.5969	22.9915	25.8609	28.1473	31.2458	32.5702	35.5006	40.3398	43.7013	44.3204	48.6632	52.4085	54.7052	58.3621	58.5953	62.6026	66.2933	69.1953	70.558	72.5051	74.1168	76.4233	76.6571	76.616	78.4857
	31.6437	34.1997	30.3932	31.6641	30.2988	33.1428	32.3811	31.3751	33.603	31.5685	29.3479	31.8186	31.5807	30.9402	35.7275	35.0307	30.3924	32.245	32.8958	39.9639	36.3143	37.1652	36.1802	36.6623	36.3316	39.2037	42.7798	43.6664	49.0438	49.9194	53.8132	57.8456	62.0984	63.6279	68.4334	71.7947	73.4287	78.1515	79.9722	81.8647	85.6386	88.5768	89.3293	92.1205	96.1569	101.093	103.126	103.129	106.034
	35.1782	37.7515	33.5624	35.3699	34.6839	36.9915	36.1482	35.4959	37.8717	35.4437	33.5674	35.8251	35.4588	33.1497	38.7603	36.9613	33.8384	35.0045	35.6077	43.4924	39.1327	40.1297	39.5973	40.0216	38.8423	44.7633	47.9109	51.3036	57.3139	59.3501	64.742	71.361	75.7386	78.8845	85.2636	88.3208	92.1286	96.1515	98.1759	98.8773	103.889	107.172	107.819	109.288	109.182	111.381	109.903	109.351	111.468
	29.5821	31.0394	26.8407	28.0301	27.6698	29.5768	28.676	28.5291	30.8644	27.9969	26.6094	29.466	28.3313	27.1863	31.8411	30.73	26.2921	27.8051	28.6134	35.8452	32.5466	33.3471	32.9586	33.3805	33.718	38.034	39.8522	41.932	46.4545	47.0116	50.2185	54.7457	58.3875	60.609	64.7144	68.5309	72.5078	75.9053	78.4152	80.1481	84.1109	87.6457	89.0858	90.1069	92.1757	94.9859	95.2737	95.1672	96.5027
	54.431	55.4125	52.3779	52.7535	51.5322	55.3311	54.7158	52.8632	57.0896	53.3584	50.2494	54.2738	52.8282	51.8242	56.2393	57.2054	52.0235	54.0881	54.3075	62.6295	57.4107	58.5841	57.9317	58.1394	57.2614	63.947	67.3026	71.201	79.9006	80.8738	86.0249	91.4951	98.0345	99.3194	105.588	109.632	108.789	112.846	113.273	113.159	117.19	119.836	119.216	121.251	119.194	121.103	120.053	117.275	118.431
	36.5834	38.8532	35.102	34.2427	34.8226	37.0825	35.8928	34.9119	38.4672	35.2383	32.9047	36.3445	34.9869	33.6265	37.5583	37.004	33.1581	35.5166	35.6214	42.5586	38.5986	40.0946	38.9554	38.9063	39.0795	40.3565	43.7196	44.0122	49.1942	49.6989	53.3909	57.823	61.9958	63.5049	68.1769	72.047	74.0051	78.1586	78.5758	81.7891	83.9205	87.4214	87.7319	89.427	91.2825	92.8357	91.5481	92.6833	94.9118
	28.2935	30.2917	26.9991	26.6417	26.8569	30.3846	29.0938	27.6678	32.2056	27.3996	26.387	29.1667	29.5795	26.7473	31.3314	31.0208	27.1607	28.566	29.22	36.4378	32.745	33.4505	32.4417	33.1801	32.9227	36.4992	38.6936	40.6412	44.1848	44.754	48.1263	52.9835	57.4034	59.6119	64.5673	68.6848	72.2692	76.5994	78.9013	80.992	85.8086	89.6136	91.727	94.4777	96.1307	99.6556	100.396	101.138	104.192
	18.2281	19.7715	16.0218	17.8279	16.4521	19.8648	18.4329	18.343	21.3757	18.2771	17.4329	19.7343	19.7057	17.4211	21.5423	20.5655	16.0898	18.1346	18.3615	25.3832	21.4416	23.1666	22.6189	22.5164	22.6307	24.3034	26.1468	28.7726	33.2157	32.496	35.3054	40.8041	45.9947	47.8872	52.3259	56.9028	60.1305	65.1004	65.7783	68.7011	72.6052	75.0057	77.7296	81.0504	82.779	84.7373	84.4263	86.7937	88.2709
	18.113	19.9076	16.5308	17.3468	16.6091	19.7311	18.3621	18.0461	19.4008	16.7108	15.3682	17.8448	17.146	15.437	19.8224	18.8593	14.9927	17.199	17.3496	23.8751	20.458	21.5212	20.2997	21.3072	21.0992	24.866	27.9731	31.0183	35.9013	37.1619	42.6213	48.0989	52.761	55.0449	62.1531	66.0554	68.2764	73.9101	75.8709	78.5854	82.3589	86.3774	88.4094	90.8731	92.6328	95.3171	96.0125	96.8261	98.7419
	16.1409	18.6298	15.6214	16.0599	15.0989	17.8809	16.7475	15.9959	19.6159	15.5518	14.1051	16.8266	16.2711	14.0656	19.2792	18.4746	14.6934	16.4848	16.6224	23.9852	20.1322	21.089	20.1452	21.1378	21.1977	24.7967	26.9082	29.482	32.4411	33.4712	37.6793	41.084	44.6594	46.8734	50.6263	53.9202	56.7679	60.2239	62.6927	64.002	68.1995	68.7792	69.8383	71.58	72.2487	73.6492	73.7508	75.5016	75.7528
	12.1765	14.3244	10.3562	11.3856	10.837	13.4339	12.7148	11.3027	14.7849	11.7066	9.84537	13.3192	12.2822	10.4141	14.6489	14.2524	10.2753	12.0101	11.7275	19.1248	15.9247	16.6204	15.6446	16.7843	16.247	17.5739	19.6756	20.5807	24.0596	23.9595	26.0126	30.014	32.7386	33.9637	37.7846	39.736	41.9854	47.0145	49.2589	50.9811	56.1971	59.4192	61.8363	64.3962	67.4296	71.46	72.3813	73.2296	76.9077
	20.9783	23.8597	19.9113	20.9708	19.0751	22.4759	22.428	21.305	23.9856	20.5535	18.4749	20.8111	20.3478	18.6099	24.0791	23.4978	19.1763	20.5363	20.575	28.2844	23.6136	25.3624	24.4759	25.8575	25.063	28.9336	31.0052	33.6437	37.3233	38.7844	42.3345	46.9054	52.0808	54.2295	59.3063	62.8509	66.7013	73.1409	74.2793	76.2	80.8929	83.4575	85.8034	87.8431	89.789	91.3631	93.0083	91.7885	93.2655
	22.0408	23.8563	19.8967	21.6818	21.3617	23.9817	22.4439	21.6018	25.0372	22.2221	20.1415	23.0749	21.9939	20.6357	25.1497	23.6364	19.7994	22.7646	22.6236	29.8434	26.7508	27.852	26.2361	26.8521	26.9588	30.1439	32.3839	34.1633	38.255	39.7634	43.3658	48.4482	52.8223	53.494	59.6144	61.7827	65.1005	69.5487	71.9181	73.3431	77.5673	79.5211	83.5091	84.342	85.8202	88.8984	88.3088	89.7905	92.324
	31.1105	31.9241	28.831	29.139	29.1173	31.9925	31.1641	29.8279	33.6238	31.2312	29.5678	33.335	32.299	31.4554	35.5923	35.3196	30.4472	32.5465	33.1011	40.8383	37.0949	37.856	36.4753	37.9829	36.8694	41.1167	44.1095	47.8264	52.4739	54.7212	58.8999	64.4257	69.2695	71.6482	76.034	78.1625	80.7296	84.7927	85.5289	86.9899	90.6736	93.8381	95.2216	96.1564	97.4768	102.87	107.344	107.822	111.66
	26.6674	29.0862	24.687	25.495	25.0718	27.4383	26.9615	25.6691	29.1668	25.7537	25.216	27.1811	27.5641	24.9394	30.5997	28.8283	25.3141	27.8508	27.9227	35.0336	31.0625	33.2979	31.2756	32.7344	30.4052	33.972	36.7712	37.3757	42.0083	41.3474	43.886	48.1973	51.2255	52.8666	57.8887	62.3811	64.9643	68.5709	70.2184	71.5588	76.1292	77.6324	79.5807	84.0598	84.0371	86.6271	87.8639	87.5686	88.6022
	44.7644	46.9131	44.077	45.1676	44.0042	48.1791	46.3566	45.4063	48.8932	43.7261	41.7544	44.2743	43.9702	41.822	47.8769	45.7597	41.3987	44.4485	44.3142	52.5202	48.1869	49.6338	48.8424	49.8557	49.4445	52.9119	56.6237	60.0878	64.1754	66.8428	69.8442	76.932	80.6077	82.9951	87.5402	92.6819	94.8901	99.6449	102.137	104.993	108.283	110.396	111.052	113.146	112.142	114.795	115.234	113.681	115.323
	14.4768	15.6847	12.6558	14.4659	13.4203	16.301	14.9075	14.6526	16.8355	13.9009	12.0462	14.8318	14.1944	12.7305	17.1268	15.8035	12.7546	14.5855	14.8314	21.9624	18.1867	18.5509	18.1285	18.22	18.4255	20.6447	22.2855	23.6911	25.3326	25.5156	28.162	31.3729	33.5291	34.8892	38.0285	39.7883	42.0521	45.8435	47.4744	49.3759	52.6871	55.7204	57.116	60.2021	61.0629	63.906	65.52	66.675	69.0532
	34.6688	36.1829	32.5892	33.4093	31.0477	36.3455	34.1338	33.6523	35.2526	31.9873	31.32	34.2618	32.9143	31.0351	35.7125	35.3588	31.3527	32.6845	32.9885	40.9201	37.9354	38.0958	38.0765	38.0723	37.4795	41.6412	46.4113	49.2079	56.1219	56.0776	61.9448	67.4835	73.4774	75.0565	79.6735	84.0978	86.4017	87.643	87.842	88.9603	90.1266	92.9639	92.194	92.0832	93.1379	93.7323	93.6257	92.4786	94.4251
	23.7784	25.6042	22.6165	23.0772	22.3553	25.9797	23.9211	23.3945	26.2894	23.2749	21.1097	23.8938	23.1411	21.4581	26.0404	25.9454	21.3137	23.7596	23.3168	30.6628	27.141	27.2828	26.8187	26.8005	27.234	28.9933	30.8541	33.1297	36.9974	37.1188	40.8086	43.8012	48.4031	50.3075	54.0626	56.5027	60.6461	64.2938	65.1801	67.2364	70.1839	73.9537	73.9851	75.2961	75.308	77.4773	77.4791	77.9803	79.2063
	38.0885	41.378	37.236	35.804	34.4621	38.7944	36.5774	36.3238	39.069	35.9022	32.8921	36.1499	36.0299	33.7324	38.6442	37.8089	34.2994	36.5299	37.7399	44.7129	41.5754	41.7708	40.3963	41.5555	40.5859	44.9982	49.5232	53.3868	58.2243	57.9577	63.8161	67.6981	73.7328	72.6684	78.3621	81.6171	82.6636	86.8803	88.9414	91.2655	95.1243	95.1019	96.9227	98.6121	98.5743	101.86	102.765	101.969	103.578
	22.8364	25.2016	20.4993	22.3418	20.7369	24.2013	23.4856	23.0071	25.654	21.5294	20.5813	23.7437	22.1835	20.6579	24.7163	25.046	20.9363	22.7852	22.2395	30.1845	25.6407	26.5425	26.8803	26.2929	26.6561	28.6024	31.1724	32.5849	35.6984	37.348	39.846	43.1191	46.9436	47.3097	53.1622	56.8355	58.6006	63.0803	66.5429	69.2475	73.3954	79.198	80.7291	84.6795	86.851	92.784	92.3357	93.8231	97.5278
	26.4409	28.1091	24.5511	25.4397	24.6159	26.9641	27.1342	25.659	27.8062	25.1794	23.4449	27.2281	25.0268	23.5499	29.0474	28.6085	25.3303	26.6229	26.4575	34.3351	30.0584	30.0356	29.4956	30.8652	30.5377	33.9863	37.2498	39.2121	43.9302	44.9647	47.8634	55.6546	59.5748	59.488	64.7587	66.9278	70.5033	72.0328	74.602	77.3287	80.9658	84.6964	84.7114	84.9216	86.2415	90.0457	90.8947	90.3386	89.8127
	30.0549	29.4044	28.9306	28.3041	28.8591	28.6888	28.8324	28.194	29.1813	28.4652	28.8492	29.455	29.2039	29.2327	28.5974	29.5623	29.3893	29.3866	29.6705	29.2597	29.318	29.3108	29.5001	28.842	28.411	28.1924	30.2726	31.9697	32.9697	34.7032	36.2716	39.1347	41.1358	44.0874	46.8931	49.3377	53.4516	56.7099	60.4735	64.7703	66.4301	71.3667	75.1847	76.4597	80.7707	83.8318	86.4586	89.1811	91.1309
	26.4027	25.3648	25.6143	24.8413	26.5167	25.4013	25.4507	25.0253	25.6796	25.2653	25.3201	26.3542	25.8233	26.7104	25.6176	26.0126	26.7198	26.4121	26.151	25.5911	25.9645	26.6408	26.2531	25.8673	25.7447	26.1332	27.1281	27.5714	29.1461	29.1885	30.864	33.1281	35.8343	36.3451	39.5182	41.2497	46.1984	48.7197	51.2898	55.7196	58.3765	61.8808	65.6365	67.7585	71.4241	73.9373	78.6596	81.1603	84.5849
	32.5584	32.1329	31.8128	31.2451	31.6811	31.5271	32.3374	32.0351	32.2942	31.4647	30.9838	32.4936	32.4656	32.6688	32.3907	32.3605	32.6958	31.5965	32.2059	32.018	32.8673	31.8939	33.0814	32.3247	32.2854	32.3553	33.7687	35.5086	36.3025	38.1068	39.2952	42.5902	43.6148	48.1434	49.5148	52.892	56.6118	60.1324	63.7359	67.2897	71.4161	76.5477	80.0827	82.7581	87.3392	91.9067	95.3537	101.463	103.725
	31	30.0841	29.4605	29.2822	29.5017	29.5232	29.6243	29.5658	30.1337	29.6177	29.8293	29.5311	30.3424	30.6285	29.5194	31.0822	31.366	30.2154	30.2568	29.6874	30.4475	30.2202	30.4913	30.0458	29.9053	29.8066	30.9846	32.2316	32.3101	34.427	35.0315	37.9186	38.8136	40.3448	42.8988	43.9891	47.361	50.0949	52.8779	55.4727	57.2198	60.9949	64.1176	64.3466	67.9633	70.547	73.0731	76.0203	77.3994
	23.4535	22.5589	22.3674	22.8472	22.6299	21.7985	22.4649	22.0447	23.0207	22.3505	22.767	22.4132	23.5505	23.7441	22.3619	22.9953	23.4762	23.3971	22.4509	21.4977	22.8183	22.1724	22.426	22.4328	21.5569	22.361	23.7589	24.2573	25.4862	27.0277	28.7021	31.0514	32.5109	35.6815	38.9977	41.0827	45.6294	48.4514	53.7453	57.1773	61.2081	67.0543	72.5684	76.383	81.7915	87.4401	92.009	99.1517	103.961
	22.2089	21.4934	22.2377	21.4086	21.9727	22.0435	22.36	21.2459	21.6778	20.7707	21.4978	21.8442	21.5924	22.9848	21.1851	22.1658	22.3065	22.7476	21.6573	21.0341	22.2619	21.5913	21.7311	20.2115	21.0711	21.4532	22.6558	23.9422	25.672	25.1319	26.969	29.9152	30.4476	33.0502	33.8551	37.2437	39.5369	42.8139	44.7209	47.2552	49.354	55.0753	57.6753	59.8639	62.9369	68.4778	71.5734	74.7817	78.6203
	25.4031	24.8915	23.7973	24.4536	23.9378	24.4187	23.9858	23.9003	24.6213	23.5589	23.2613	25.059	24.5788	24.2962	23.9397	24.9939	23.9189	23.7315	24.3478	23.988	23.8115	23.9228	24.3227	23.2961	23.3466	24.7106	25.8471	27.8813	29.9647	30.7429	33.0025	35.8912	38.7628	41.5169	45.0786	47.7868	50.7791	54.4905	58.9867	64.0075	66.6939	73.1332	76.427	79.5316	85.2081	89.9959	92.6722	98.6246	100.454
	27.3856	27.389	26.6591	26.5061	26.6006	26.1548	26.5264	25.9373	26.6875	26.0699	26.3299	27.1132	26.8663	27.3023	26.6257	27.7056	27.3347	26.7555	26.7134	26.273	26.6641	26.2184	26.907	26.4825	26.1497	27.0025	28.6521	30.2511	31.5626	32.9704	34.6138	37.5727	39.6491	43.0893	45.4242	48.8833	52.9945	56.6796	59.8703	63.4715	65.5233	71.6416	75.789	78.4376	83.5264	88.4484	91.1346	95.2537	97.5906
	20.798	20.0583	19.99	20.0352	19.7673	19.8005	19.798	19.1434	19.8739	19.0756	19.6405	19.3485	19.9336	20.1164	19.5242	20.3406	20.2204	20.126	19.6411	19.7985	19.8146	19.854	19.943	19.7167	19.2308	19.8804	20.9535	22.5852	23.8807	25.0018	26.8812	30.2016	32.2735	34.8201	38.0334	40.7442	43.7139	47.9382	50.1179	53.2749	54.2552	59.3409	62.3725	62.5606	65.6106	69.3594	70.8957	73.3728	74.7127
	24.512	23.5962	22.8743	23.4159	23.4904	23.9412	23.7476	23.2361	23.1827	22.9734	23.4741	23.727	23.7154	23.8448	23.1885	24.4065	24.2876	24.1114	23.2498	23.1344	23.3241	23.4645	23.8949	23.2619	22.7549	23.0069	25.294	26.3474	28.2561	29.0898	30.3382	34.0559	35.4957	38.5531	41.4185	43.292	47.38	51.1258	53.8547	56.992	60.4117	65.7464	68.903	71.2982	75.6498	79.6063	82.6591	85.78	88.4175
	24.9233	23.9872	24.1855	24.0241	24.7051	23.7967	24.0621	23.017	23.866	23.1795	23.3212	24.3553	24.3501	24.505	22.7767	24.0903	24.4924	24.5664	23.8324	23.1788	23.9148	23.6648	23.6168	24.3288	22.9606	22.9923	24.9698	25.5577	25.8903	27.1749	27.938	30.7207	31.0052	32.508	33.8121	35.4036	38.0411	39.248	41.5009	44.0092	44.9109	48.6007	51.7341	52.7717	55.6736	58.3121	61.4837	64.833	67.2012
	24.5957	24.8433	24.0978	23.7481	24.0655	24.0382	24.3877	24.1932	24.4822	23.463	23.4957	23.9844	24.7069	25.215	23.8294	24.6857	24.8369	24.4619	24.2493	23.2137	24.809	24.0748	24.1613	23.6971	23.0345	24.8216	25.6542	27.116	28.1181	29.3925	30.6239	34.0376	35.5337	38.1157	40.3085	42.7689	46.7944	50.2223	53.7833	57.3205	59.158	64.6884	69.0319	71.6646	76.7409	81.0948	84.9903	88.7239	91.0786
	26.2256	24.903	24.5189	24.2615	24.4558	24.5319	25.0183	24.059	24.5278	24.0599	24.0634	24.3818	24.8324	25.1387	24.339	25.5464	25.1598	24.9917	24.65	24.6913	25.3182	24.4221	24.9588	24.4482	24.0056	23.7239	25.5611	26.3718	27.3061	28.2733	29.3467	32.2967	33.0157	34.9758	37.0399	39.3645	42.6133	45.4644	48.6196	51.7026	53.896	59.5148	64.1858	65.1971	70.0153	74.0556	78.1859	82.7084	85.1287
	32.1805	31.6366	30.7731	30.5221	31.1673	31.1842	31.54	30.9254	31.2174	30.8362	31.2507	30.9176	31.6747	31.8402	30.5102	31.8775	31.636	31.9723	31.301	31.1677	31.6381	31.5492	31.123	31.5362	30.7137	31.3632	32.786	34.1073	34.9998	34.9907	36.9207	39.4694	40.6343	42.6569	44.3672	46.495	49.4155	52.1622	54.6637	57.9961	58.9981	63.8281	66.8476	67.6487	71.2727	74.0146	76.2305	78.893	79.8653
	26.0815	25.5536	25.3048	24.6247	25.3485	25.0375	26.0221	24.697	25.0896	25.2141	24.9906	25.6127	25.7943	26.479	25.6373	26.3186	26.1247	25.8516	25.7757	25.2644	26.3757	25.707	25.6472	25.6735	25.3054	26.7409	28.1105	29.1796	30.5333	32.1477	34.3248	36.9546	38.8552	41.263	44.0132	47.0047	51.1742	54.7444	58.1026	62.2732	63.8792	70.1965	72.9976	75.6118	80.7656	84.6333	87.7031	91.0917	93.461
	16.8373	16.1598	15.5005	15.28	15.3608	15.731	15.6497	15.3936	15.8929	15.1457	15.492	15.7657	15.8784	16.3531	15.4895	16.0365	16.1815	15.8775	15.511	15.5813	15.3239	15.5577	15.896	15.4744	15.1418	15.5592	16.5789	17.329	18.066	18.67	19.4999	21.5284	22.7333	24.2324	25.9581	27.5838	29.8286	31.6216	34.4671	36.6044	37.728	41.2811	44.3051	44.8797	48.9485	51.6826	54.0795	57.0877	59.3106
	25.3859	24.405	24.4338	24.1257	24.3632	25.0333	24.9932	23.7433	24.6066	24.2541	24.3631	24.2541	24.9996	24.5705	24.1604	24.8133	25.3631	25.0193	24.3902	23.9167	24.5515	23.756	24.7217	24.4944	24.1108	23.9748	24.9089	26.3508	27.3591	28.3873	29.9262	32.0441	33.5108	35.2982	37.2871	39.4045	43.068	45.8103	48.4094	50.4215	52.4399	57.3617	59.6605	60.3538	63.9518	66.9843	69.7229	72.297	75.1946
	25.6053	24.7749	24.5293	24.4188	24.562	24.6666	25.304	24.1572	24.8569	24.3221	24.5706	24.9875	24.9323	25.1193	24.9653	25.8475	25.5925	25.8098	25.4275	24.6809	25.3986	25.2779	25.4733	24.8831	25.1246	25.2543	25.7335	27.9274	28.3763	28.9153	30.0386	32.1745	33.7606	35.4212	37.2764	39.082	41.9838	45.0548	47.4638	50.2696	52.2801	56.9821	60.5564	62.4864	66.9068	70.4394	73.7462	77.893	80.9901
	18.6029	17.9573	17.4721	17.5315	17.5527	17.5138	18.215	16.8531	17.7957	17.769	17.5737	17.8696	17.7244	17.8745	17.183	18.0652	17.7943	17.8829	17.334	17.5254	17.7016	17.6835	17.3084	17.1887	16.9287	17.526	18.2876	19.1377	19.9922	20.2649	21.3867	23.5364	24.0381	25.6616	26.7457	28.0223	30.2285	32.5814	34.0824	37.3162	38.5446	42.1331	45.2466	47.757	52.3305	55.9877	59.8543	63.3049	67.338
	11.9709	11.7817	11.2871	11.1103	11.02	10.873	11.7933	10.8594	11.3579	10.7498	11.1892	11.3165	11.659	11.7476	10.9025	11.5534	11.9057	11.4355	11.4618	10.8428	11.3423	10.9026	11.6689	10.8888	10.0226	10.8376	11.452	12.5011	13.7246	14.73	15.7151	18.5237	19.9442	22.5348	24.5119	27.5985	31.4188	34.4622	37.7229	41.8133	44.6707	49.8426	54.4938	56.4675	62.2507	66.7027	71.6352	76.0618	79.6154
	30.3903	29.6106	28.6754	29.0101	28.934	29.3612	29.856	29.1699	29.269	28.048	29.6506	29.4307	29.2033	28.906	28.5268	29.7008	30.1342	29.9589	29.4875	29.3328	29.6053	29.2112	30.2647	29.0106	28.6338	30.0702	31.3039	31.5622	32.6736	32.2614	33.3011	35.5724	36.3963	37.309	39.1054	40.0399	42.3514	44.1117	46.4872	48.4845	50.7327	54.2298	56.281	57.4518	60.7399	64.6313	66.589	69.7481	72.3999
	32.227	32.1425	31.2658	31.3068	31.6626	31.2647	31.3984	30.9211	31.1014	30.7921	32.0524	31.623	32.3323	31.884	31.4143	32.4237	32.6021	32.4428	32.2582	31.4641	32.1799	32.1942	32.1592	32.8509	31.6732	32.7136	33.9756	34.8636	36.2843	36.141	37.1066	39.5244	40.5664	41.7816	43.955	45.7406	48.279	51.0979	53.3955	55.808	57.0829	61.4488	64.0111	66.0456	70.1064	73.0473	76.2169	80.2124	83.3689
	14.4055	13.9352	13.5688	13.6002	14.0199	13.9753	14.1383	13.5588	14.0134	13.4033	13.6463	13.8565	14.4566	14.2962	13.4168	14.6142	14.6958	14.101	13.6167	13.2141	14.5069	13.4589	14.1575	13.6317	13.0186	13.4675	13.9336	15.2049	16.6684	17.1194	18.5106	20.7018	22.1121	24.6983	26.2597	28.4739	32.1616	34.4347	36.5087	39.8409	41.4621	46.0653	48.6902	50.4135	53.9052	57.5192	59.2812	63.9371	65.2518
	27.5037	26.5609	26.8051	26.4446	26.2085	26.4994	26.745	26.0406	26.9844	26.1992	26.6858	27.0168	26.906	27.3889	26.366	26.9519	27.6076	27.3678	26.6368	26.1873	26.9899	26.2374	26.7635	26.4107	25.9671	25.9478	27.2328	28.2216	29.1158	29.4395	30.7075	32.4932	33.3772	35.2191	36.6964	38.3225	41.2555	43.5367	45.5897	48.7567	49.7555	54.3486	57.1368	59.3922	62.9727	66.5493	68.633	72.1138	74.4817
	36.0055	35.3093	34.2981	33.7866	34.5229	34.892	35.6461	34.784	34.911	33.8551	34.6863	34.8904	34.534	35.781	33.9227	35.4047	35.511	34.6027	35.1089	34.041	34.4999	35.088	34.9593	34.1806	34.3696	34.8615	35.4768	37.6255	37.1573	38.4963	39.4237	41.6309	42.7273	44.0846	46.5116	47.5357	50.6408	52.2294	54.5841	57.3519	58.0773	62.7584	65.1496	65.7042	70.1126	72.627	76.2006	79.4388	82.7471
	21.3842	20.8181	20.4265	20.5541	20.6068	20.8653	20.9983	20.5091	20.5494	20.2974	20.9486	21.0072	21.2014	20.9529	20.2344	21.4953	21.1467	21.1743	20.9367	20.7439	20.8208	20.6022	21.3135	20.7027	19.9885	20.0521	20.5886	21.4928	22.1229	22.5385	23.3025	25.3527	26.2253	27.7945	29.026	30.2821	32.7605	34.6429	36.6911	39.1178	39.9104	44.1121	46.558	47.796	51.6036	54.6449	57.5922	60.6425	62.595
	24.4825	23.6369	23.6189	23.5193	23.3748	23.314	23.8401	23.1093	23.0789	22.4276	23.2017	23.4311	23.57	23.7745	22.7172	24.1807	24.09	23.8571	23.6951	23.1804	23.0146	22.8237	22.8834	22.5185	22.8276	22.9596	24.2603	24.6395	25.5369	26.3784	27.4529	28.9426	30.0847	32.645	33.5444	35.2302	38.1466	40.6703	42.6085	46.555	47.5487	51.8939	55.6843	56.6077	61.2417	65.4374	67.5123	72.3726	75.2867
	17.1934	16.6842	16.0477	15.6663	16.2005	16.0923	16.7746	16.1833	16.6006	15.9581	15.4072	16.8998	16.4634	16.0997	15.282	16.4842	16.6744	15.9397	16.0928	15.1562	15.7636	15.2303	15.5521	15.044	14.8004	14.9826	15.8309	16.9556	17.368	17.7644	19.424	21.7482	23.268	25.2978	26.8499	29.104	32.695	36.0756	38.8433	41.7088	43.6304	49.5243	52.7288	54.5254	58.9744	62.4315	65.4447	69.315	71.681
	22.6893	20.487	19.1911	20.736	19.9647	20.2229	20.7591	19.2706	19.8554	17.8563	20.4352	20.4097	20.3387	20.9612	19.2553	20.7893	21.0811	19.5054	19.3352	19.9437	20.2775	19.2798	19.0443	19.2713	18.0284	18.224	19.2718	20.7717	21.4967	22.5311	24.8579	26.8261	29.7378	31.8106	32.5572	35.664	38.6024	43.3573	46.9756	50.6468	53.9423	60.9034	64.2818	67.5984	71.4415	77.7186	82.6134	88.3782	89.2391
	21.6038	20.7952	20.4	20.1158	20.7753	20.3823	21.3089	20.2415	20.8535	20.2692	20.8606	21.2188	20.5346	21.4195	20.3267	21.3305	21.184	20.6394	20.4339	20.2543	20.7566	20.6797	21.0671	20.253	20.1112	20.1448	21.0128	22.0583	22.9731	23.5862	24.3925	26.859	27.9804	29.7241	31.3615	33.0187	35.7987	38.4202	41.2908	44.0269	45.7884	50.1926	54.0229	55.6881	60.0418	64.3832	67.4847	71.2012	73.7977
	17.6141	16.487	16.5918	16.5466	16.9376	16.6749	17.2361	16.3647	16.85	16.1687	16.4592	16.943	17.078	16.9622	16.1889	16.7176	17.5999	16.7208	16.0512	16.1767	16.406	16.2617	16.2701	16.0223	15.8991	15.6559	16.4856	18.0299	18.6547	19.06	20.226	21.8551	23.1127	24.5388	26.1098	27.5871	30.1325	32.9539	34.7447	37.485	39.2953	44.0671	46.6819	48.4685	52.4723	56.5462	59.5432	64.1886	67.2384
	23.1003	22.295	22.2827	22.0605	22.106	21.9637	22.3838	22.0523	22.427	21.7305	22.0582	22.0845	22.4763	22.5883	21.8244	22.5188	22.1512	22.4395	22.4399	21.8765	22.3036	22.0287	22.604	21.7193	21.4554	21.9946	22.8719	24.3751	25.3948	26.5408	27.853	30.3211	31.1641	33.1294	34.9282	37.3769	40.4204	43.3948	45.856	49.3634	52.077	58.4571	62.8758	65.8115	71.3587	76.3587	80.5859	85.3144	88.9833
	22.6276	21.6851	21.4796	21.6816	21.7525	21.6161	21.9267	21.3004	22.1942	21.6419	21.6283	22.0159	22.2531	22.5354	21.4811	22.7339	22.3703	22.2504	22.0339	21.6275	21.9967	21.5547	22.0504	21.7321	21.0212	21.1751	22.2136	23.7529	24.7196	25.4527	26.6218	29.1316	30.1431	32.4774	33.3437	35.2346	38.0033	40.2458	42.5753	45.3919	46.824	50.7536	53.3305	54.5179	57.4831	61.0267	63.1589	66.294	68.2893
	21.0759	20.7315	19.9736	20.1576	20.1043	20.3831	20.6756	20.0792	20.8204	20.2176	20.5734	20.3977	20.6587	20.9238	19.8255	20.8897	20.6762	20.6054	19.7537	19.5077	20.2863	19.7957	20.6828	20.197	19.5852	18.9653	20.3932	22.3329	22.7322	23.8868	24.902	28.028	29.7241	32.1875	35.1574	36.8682	41.0554	44.46	47.4498	52.117	54.0256	59.0943	62.9107	63.9137	68.0045	71.8789	74.951	78.0036	80.5572
	23.826	23.4134	22.8753	22.3562	22.9405	23.4379	23.6118	22.6373	23.642	22.3122	22.8094	22.8899	23.7988	22.9882	22.1884	23.6689	23.6007	22.8855	22.7536	22.3627	23.3582	22.716	23.1461	22.8936	23.0564	22.8213	23.3552	24.3311	25.3853	25.6151	26.5346	28.4508	28.6106	29.8	30.7797	32.0131	33.9827	35.9824	37.4413	38.8462	39.2525	42.7379	44.0402	45.4669	47.8371	50.6057	52.7007	54.7054	56.711
	30.2361	30.1242	29.5197	29.4939	29.0671	29.78	29.6362	29.0436	29.6591	28.5235	29.1889	29.1958	29.4444	29.7786	28.9585	30.4495	29.9149	29.4831	29.9265	29.1509	30.385	29.6552	29.9698	29.3077	28.7098	29.1955	30.2446	32.091	32.8105	34.2861	35.1523	38.2792	39.6543	41.6221	44.1851	46.7012	50.5728	54.1226	58.6003	61.5672	64.7977	71.0261	75.2244	77.5318	82.8397	86.8927	90.5665	95.341	97.7953
	35.0274	34.3228	33.3237	33.5854	33.7264	33.4542	33.9041	33.2814	33.5575	32.9411	33.4127	33.5136	33.2774	33.9144	32.8441	34.0973	34.2237	34.0362	33.865	33.2333	33.9705	33.5326	33.914	33.413	33.5288	33.7714	34.9118	36.1938	36.7038	36.8406	37.9737	39.8179	40.2584	41.2718	42.6869	43.3951	46.3151	47.5721	49.3671	51.3525	51.0129	54.8718	56.7589	56.5449	59.2159	60.4859	62.5417	64.9781	65.5708
	18.7878	18.1504	17.6087	17.6931	18.2496	18.1451	17.6173	17.4341	18.5223	17.5371	18.0351	18.0176	18.1784	18.7272	17.7957	18.3828	18.3108	18.2756	18.2139	17.4918	18.139	17.9557	18.3472	17.9329	17.1606	17.8338	19.0114	20.2296	19.8322	20.3218	21.2555	22.8378	22.8582	24.2568	24.9838	25.5371	28.4958	29.7878	31.0086	33.4451	32.5621	36.1185	37.6214	37.5379	40.9925	42.1979	44.6991	47.6549	48.6988
	23.441	23.0947	22.5305	23.0138	23.0456	22.7468	23.2752	22.5937	22.8288	22.1398	22.9803	23.1831	23.3541	23.6314	22.8977	23.6449	23.7918	23.1568	22.7567	22.4194	22.7929	22.173	23.1722	22.6717	22.3884	22.1319	23.8885	24.6937	25.736	25.8525	26.6177	29.1209	29.9691	31.4686	32.4208	34.2989	36.1974	38.3241	40.5223	42.8563	44.826	48.3885	51.1579	51.5908	55.7631	58.2172	61.2721	64.9885	66.4518
	24.9935	24.2627	23.9339	23.9862	24.2025	24.1778	24.7737	24.0898	23.9597	23.3704	23.673	24.328	24.2761	24.5308	23.2764	24.6541	24.3976	23.9882	23.8896	23.3098	23.9035	23.7304	23.9143	23.4784	22.9744	23.6748	24.5205	25.6189	26.2423	26.6659	27.7139	29.6715	30.4675	32.5151	33.9028	35.8336	38.6884	41.086	43.3999	45.995	47.8474	52.5821	55.8864	58.437	63.7069	68.0871	72.0401	76.8735	80.4744
	22.0991	21.0082	20.7504	20.96	20.9635	20.9125	21.0972	20.4321	20.9155	20.4912	20.9407	21.2127	20.8755	21.2362	20.4286	21.1259	21.2176	21.0202	20.9831	20.175	20.781	20.8	21.0814	20.4124	20.0049	20.65	22.3646	23.4143	24.6296	25.5795	27.1055	29.7976	30.7619	33.2362	35.459	37.4901	41.3216	44.4904	48.338	52.0722	54.7346	60.5453	66.2333	68.7281	75.3701	80.3651	85.5326	91.3186	95.6282
	21.6126	21.0188	20.7172	20.7017	20.603	20.769	20.8668	20.0321	20.8452	20.2284	20.6304	20.7802	20.7511	20.7653	20.1916	21.2991	21.0956	20.9471	20.5925	20.3531	20.5976	20.5022	20.8172	20.2518	19.8776	20.3326	21.3677	22.4349	24.2384	24.7729	26.6467	30.2637	31.6869	34.9677	36.9591	38.9432	43.098	46.0373	49.2203	53.3596	54.5377	59.967	63.8567	64.8488	69.2675	72.7607	75.6975	79.2779	81.1287
	12.3236	12.0954	11.6176	11.5915	11.9801	11.9605	11.8121	11.0242	11.5273	11.3458	11.3727	11.8059	11.6354	11.9738	11.109	12.1593	11.7768	11.6629	11.0945	11.2202	11.0948	11.1127	11.4037	10.8824	10.8306	10.3777	11.3949	12.2901	12.5395	13.0369	13.7257	15.7222	16.4079	17.8304	19.0046	20.7078	23.2585	25.1364	27.1885	29.2941	30.5558	34.7516	37.7549	38.5537	41.7192	45.0618	47.8616	51.3881	53.79
	7.41131	6.86634	6.6588	6.72754	6.6743	6.68915	6.51448	5.97753	6.67096	6.0611	6.29606	6.60513	6.83328	6.73845	6.00015	6.78269	6.50241	6.45234	6.33602	5.91681	6.42227	6.05633	6.14028	6.23312	5.42682	5.33425	6.04335	6.97352	7.45239	8.02378	9.0877	11.0493	11.9044	13.1436	14.3832	15.7357	17.7758	19.5004	21.2562	23.3673	24.3547	27.7589	29.5581	30.9624	33.4368	36.4615	38.343	41.2542	42.6054
	18.9807	18.4449	17.8795	17.9955	17.7601	18.1251	17.9023	17.6649	17.4671	17.3118	17.6137	18.4254	18.1788	18.3594	17.2409	18.3621	17.9754	18.4424	17.524	17.1947	17.7347	17.5584	17.5131	16.8217	16.8725	17.3851	17.8725	18.8963	19.7788	20.0806	21.0882	23.1906	23.9757	25.8114	27.4606	28.2761	31.1395	33.4395	35.3984	37.8603	39.1681	43.5041	46.244	49.1375	52.8961	56.563	59.1177	62.9263	66.5328
	13.0111	12.6197	11.888	12.3376	12.2474	12.1295	12.3388	11.9876	12.1939	11.8503	11.9116	12.3556	12.3708	12.3206	11.6931	12.1057	12.4322	12.0055	11.7304	11.5103	11.831	11.7772	12.0324	11.927	11.3037	11.381	12.7059	13.9213	14.9593	15.6449	17.4559	19.7576	20.7595	23.3743	25.3334	26.9153	29.5806	32.8527	34.5035	37.2362	38.0809	41.8752	44.0684	44.9497	47.9019	49.6169	52.3341	54.3827	55.9893
	17.8478	17.113	16.7958	16.7586	17.5093	16.5191	16.6766	15.4933	16.6769	15.9894	16.3199	16.7737	16.5848	17.2682	15.7488	16.6321	16.8969	16.8285	16.1479	16.1028	16.2588	16.1866	16.0407	15.5197	15.4169	15.7534	16.0818	17.1255	17.6948	18.4674	19.7595	21.2918	22.214	24.0597	25.5389	27.1298	29.354	31.6691	33.6767	36.1122	36.7971	40.7848	43.6043	44.68	47.6152	51.1757	53.1336	56.2367	58.1376
	22.8071	22.2135	21.4687	21.2093	22.1078	21.7597	22.2858	21.3867	21.9373	21.0941	21.3497	21.5973	22.0429	21.9637	21.8293	22.188	21.9219	21.965	21.9326	20.6354	21.7521	21.1213	21.5773	21.4495	20.6796	21.715	22.6942	23.9612	24.6332	25.7048	26.733	29.2141	30.1851	33.1134	35.3624	38.3409	42.1969	45.6275	49.239	53.3308	55.4151	62.0065	66.9135	69.1146	74.4428	79.7055	83.4087	88.8507	92.0013
	25.1041	24.9309	24.697	24.1545	24.4111	24.7067	25.465	24.3904	24.5954	24.281	24.3102	24.961	25.1589	25.6662	24.9575	26.2654	25.0619	25.3104	25.3152	24.9441	25.6464	25.239	25.8639	24.9398	24.043	25.5962	26.3293	26.8208	27.2393	27.9319	28.5867	29.3322	30.2578	31.5423	33.196	34.1394	35.9145	36.9679	37.811	40.5103	39.9322	43.0217	44.7014	44.9634	47.0776	49.6787	50.2376	52.9274	54.0258
	25.1849	24.3961	23.9008	23.6875	24.0915	24.1033	24.4037	23.5225	24.0211	23.1424	23.5679	23.7796	23.9745	24.4423	23.0797	24.2459	23.9449	24.1478	23.587	23.2644	23.4392	23.5006	24.3357	23.3738	23.1926	22.9784	24.2104	25.6523	25.9299	26.7821	27.9835	29.7236	30.7396	33.091	34.6465	36.4469	38.0759	40.653	42.6327	44.9013	45.4993	50.3389	53.3411	54.3296	58.3624	62.7193	66.6326	70.6991	75.2321
	21.4999	20.904	20.0262	20.6568	20.4756	20.335	21.1557	19.9868	20.6054	19.8995	20.3879	20.5681	20.9208	21.0395	20.2063	20.9755	21.2249	20.4513	21.0367	20.3048	21.3679	20.4975	20.9732	20.2491	19.4998	20.3283	20.409	21.4681	21.8618	22.1199	22.8165	24.0696	24.3576	25.2315	25.7566	27.0132	28.7107	30.4749	31.0158	31.9187	32.5346	34.9281	36.5231	36.753	39.2456	41.4275	42.7617	44.6131	45.6687
	27.2941	26.2109	26.274	25.9865	26.2019	26.8828	27.0202	26.4815	26.4389	25.8767	26.207	26.6784	26.6097	26.9054	26.37	26.8201	27.0016	26.9259	26.2445	25.9764	25.3833	26.1174	26.5954	26.0156	25.1777	25.4095	26.4075	28.1478	28.7282	30.1658	31.3554	34.7149	35.3253	38.31	40.0596	42.0279	46.8743	48.5458	52.3054	54.9428	55.7003	59.1129	62.3465	62.4975	66.879	69.7592	71.9912	73.5951	76.5114
	20.87	20.3707	20.4579	19.7655	19.7255	20.6755	20.6786	19.9577	20.0327	20.141	20.1362	20.4662	20.4757	20.7799	20.0343	20.388	20.4552	20.6525	19.9698	19.9052	20.8991	20.0675	20.7287	19.8373	19.1371	19.4326	20.6967	21.296	22.6759	23.4181	24.2198	26.5975	27.4329	28.5872	30.9243	32.5054	35.477	38.2983	41.5725	44.5858	47.4936	53.2427	56.4343	59.2897	64.6878	70.6004	74.2859	79.7937	83.9169
	26.6221	26.1428	26.1536	26.3665	25.4096	25.7536	25.1574	24.7252	24.1167	24.1165	24.4346	24.0938	23.5384	23.1602	23.4238	22.8361	22.9777	22.9706	22.5591	22.0645	22.53	21.7613	21.914	21.332	21.2755	21.3475	21.3421	22.7176	23.901	24.7798	27.0657	28.5876	29.9662	31.6932	34.8508	37.07	40.3623	42.3158	45.6746	48.9818	52.2762	55.588	60.1583	62.4063	66.0405	70.0666	73.346	76.6048	80.3014
	26.0923	25.8832	25.4213	25.5664	24.5005	24.7022	24.3717	24.0738	23.0016	22.8583	23.102	22.5715	22.1896	22.6654	22.4556	22.1273	21.9196	22.4948	21.5018	21.2147	21.8068	21.3628	21.186	20.8573	20.9981	21.2232	21.3585	22.4848	23.5852	24.9887	26.5023	28.673	29.4195	31.9081	34.7719	37.1757	40.2014	42.8468	46.5028	49.6653	54.0307	57.1354	61.9037	64.8043	68.7122	73.7535	76.4657	80.7355	85.9565
	29.8062	28.9616	29.0703	29.6205	28.3625	28.5242	27.7775	27.3761	26.8853	26.2805	27.2602	25.8538	25.7373	25.6396	25.4533	24.9411	24.8414	24.9356	24.2022	23.5612	24.2667	23.7569	23.4078	22.7109	23.0549	23.4321	23.6564	25.4899	26.7891	28.0753	30.3927	32.8662	34.9529	37.2138	40.8408	43.0663	47.0199	49.5192	53.9053	57.49	61.6612	65.5539	70.5324	73.4497	77.2702	82.6368	86.4802	89.7953	95.7784
	22.4382	21.9234	21.8694	22.1444	20.9514	21.8522	21.0258	20.8791	20.1244	20.1804	20.6501	19.9339	19.8444	19.538	19.9183	19.5848	19.3541	19.7556	19.3427	18.9119	19.2731	19.139	18.9222	18.4069	18.7232	18.7025	18.7045	20.0575	20.9961	21.6471	22.9826	24.8159	26.2349	27.5463	30.5562	32.5414	35.1915	36.8717	39.7217	42.2578	45.6754	49.7273	52.7722	55.1095	58.5439	62.4162	65.6509	67.603	72.5225
	22.8796	22.3755	21.9475	22.6959	21.5391	21.972	21.3634	21.2198	20.6052	20.7447	20.8936	20.1051	19.741	20.149	20.2414	19.8595	19.92	19.8944	19.7197	19.0459	19.5455	19.0041	18.8373	18.6879	19.1456	18.8266	19.1012	20.361	20.4061	21.2414	22.2284	23.3927	24.1796	25.5794	27.5568	28.8378	31.2472	32.6177	34.4667	36.6626	39.3488	42.1565	45.1921	47.232	50.7308	54.6785	57.3234	60.8026	64.9441
	23.7109	23.5815	23.1192	23.4389	22.2054	22.8431	22.6185	22.2034	21.453	21.6196	22.0283	21	20.3791	20.9309	20.8875	20.4435	20.2747	20.4883	19.8256	19.6177	19.6911	19.6979	19.7032	19.4843	19.5947	19.1233	19.3845	20.4871	21.4176	22.2567	23.9782	25.9517	26.9611	28.3862	31.1273	33.0532	35.5772	37.8271	40.6415	42.5868	46.5767	49.5253	52.408	54.7776	57.9757	62.1554	65.2129	68.1412	71.534
	27.0162	26.2393	26.8062	26.6348	25.4301	26.4185	25.1065	25.4899	24.1168	24.254	24.4571	23.7947	23.2809	23.181	23.2349	23.4087	22.8709	22.7677	22.1588	22.2323	22.7064	22.4423	22.2726	22.139	22.0717	21.2614	21.1875	22.5538	22.4761	23.5316	24.9128	25.9746	27.182	28.2888	30.3406	31.1797	34.1263	35.9007	38.0409	40.2541	42.0887	45.5518	48.6041	51.1176	53.758	58.1148	62.031	64.0196	68.6297
	31.2304	30.4397	30.2173	30.8579	29.1106	29.6158	29.0702	28.7075	27.8334	27.6118	28.1429	27.407	27.1565	27.2972	27.3449	26.8483	26.456	26.8068	26.1391	25.4817	25.8584	25.6575	25.523	25.4236	25.7813	25.2334	25.6519	27.3068	29.0873	30.1461	33.2065	35.9058	37.6899	40.4496	45.0113	47.8664	51.5894	54.2931	57.7187	60.8948	64.9432	69.2775	73.4046	76.0211	79.6376	84.0455	87.6858	90.4153	95.9471
	30.9433	30.4074	29.8961	30.61	29.0264	29.5105	28.9477	28.9588	27.959	27.8065	28.0536	27.0619	26.9112	27.0448	26.5512	26.4314	26.0573	26.9188	25.8101	25.3336	26.1349	26.2244	25.5298	25.007	25.5228	24.414	25.0529	26.5335	27.3825	28.5889	30.5595	32.6033	34.4275	36.8213	40.6886	43.0705	47.4802	50.3168	54.9659	58.0855	62.203	66.3441	70.4365	72.56	76.256	80.6434	83.9682	88.2744	92.7735
	24.7616	24.6372	24.5917	25.117	23.959	23.7384	23.8132	23.3005	22.5318	22.5476	22.726	22.3409	21.967	21.6528	21.9887	21.2636	20.8632	21.6454	20.6151	20.3512	20.8952	20.6206	20.3704	19.9506	20.1508	20.6316	20.4003	22.3152	24.3219	25.5841	28.4456	31.0048	33.3471	36.3971	40.1277	42.8733	47.3322	49.4807	52.6878	56.1889	59.7346	63.2614	66.5244	68.5724	71.971	76.7332	79.9435	83.2817	87.6769
	35.9106	35.4574	35.2949	35.1484	34.0479	34.0814	33.7089	33.7697	32.6589	32.2732	33.0132	31.723	31.5082	31.4798	31.0578	30.9663	31.2021	31.1601	30.5742	30.2831	30.6495	29.8073	29.8249	29.2978	29.1014	29.3528	29.6735	31.0996	32.4669	33.7109	35.7447	37.1895	38.9612	41.4869	45.3116	47.3884	51.6276	53.425	57.9044	60.976	65.393	68.8209	73.7195	76.751	80.5453	84.9918	89.1802	93.3585	98.1691
	25.4348	25.2957	24.8056	24.9513	23.2518	23.7756	23.9857	23.3744	22.6247	22.7996	23.4531	22.3427	22.175	22.2241	22.2587	21.8725	22.211	22.4723	21.3442	21.3735	21.3224	20.8901	20.9592	20.5211	20.6272	20.8506	21.3946	22.3382	22.8937	23.4339	24.8128	25.9816	26.81	27.6755	30.3018	31.5991	33.5905	35.2997	37.6696	39.3214	41.0997	44.0803	46.7894	48.5898	51.0036	53.8514	57.2376	59.6074	63.2537
	23.3582	22.9905	23.1897	23.1094	22.1761	22.547	22.0525	22.3509	21.4067	21.5028	21.6848	21.2289	20.6266	20.2862	20.4027	20.5484	20.2958	20.7047	19.9503	19.2599	20.0914	19.7138	19.2292	18.7962	19.3619	19.2834	19.6595	21.0307	22.3029	23.1597	24.9365	26.8857	28.8021	30.6166	33.8303	36.0999	39.3492	42.1274	44.9966	49.0685	53.6044	58.4864	63.1629	67.6178	73.6385	79.8911	86.9432	92.6407	102.258
	29.5594	29.1089	29.1642	29.035	28.1662	28.5265	28.0777	27.94	27.0881	27.0439	27.1749	26.4331	26.0789	26.4306	26.3594	25.622	25.9015	26.2859	25.7957	25.2066	25.8226	25.2885	25.2719	24.6193	24.9855	24.9889	24.8918	26.3748	27.3555	28.0401	30.3033	32.2658	33.4376	35.2355	38.5702	40.9352	43.6041	45.6638	49.07	52.1242	55.7826	59.7231	63.7209	66.2774	70.1795	75.0893	78.7268	82.7248	87.509
	25.0231	24.9159	24.7856	24.6584	23.5589	23.6592	23.5829	23.3879	22.2358	22.3497	22.8588	21.5416	21.6966	21.7002	21.7667	20.4308	20.9141	21.1532	20.7592	20.3421	20.8567	19.9763	20.2425	20.0542	19.895	20.1036	20.3539	21.2662	22.5459	22.8696	24.4627	26.3116	27.735	29.2501	31.6602	33.7019	36.8166	38.7553	40.887	43.3889	46.8424	50.0511	53.2765	55.9492	59.2608	62.3576	66.0021	69.0341	73.2953
	32.0753	31.3883	31.1179	31.0301	30.0565	30.5612	29.6278	29.2484	28.6386	28.6834	28.8692	28.1377	27.8815	27.8406	27.4214	27.3369	26.8753	27.4144	26.6866	26.3309	26.2477	26.5786	25.7129	25.6851	26.0386	25.1454	25.0807	25.3838	25.9297	27.0708	27.8811	28.6028	29.7575	30.2888	32.1222	32.8345	35.0115	35.9062	37.2793	38.3321	40.0605	42.7027	45.3089	45.9379	47.9157	51.3507	53.8988	55.5468	58.6755
	24.2564	24.3586	24.0778	24.4728	23.0587	23.6244	22.7259	22.963	21.7273	21.5848	22.5408	21.3134	21.5088	21.3626	20.5916	20.6303	20.6073	21.2972	20.8516	19.467	20.7781	20.3704	20.1032	19.7404	19.1951	19.3778	19.9221	20.7232	21.2628	22.2981	23.7215	24.4955	26.0819	26.8813	29.2359	30.3175	32.7116	34.2691	36.4636	37.8219	40.8653	43.774	47.0207	48.1302	52.4126	55.0478	58.476	61.2014	64.3291
	24.7169	24.5324	24.0723	24.5823	23.0804	23.5439	23.0667	22.7102	22.1671	22.1172	22.5034	21.7411	21.3249	21.6508	21.1571	20.7763	20.7383	21.335	20.6515	19.8961	20.7682	19.9357	19.9928	19.6433	19.5458	19.7496	20.0932	21.483	21.728	22.8031	24.2396	25.9069	27.5507	29.0817	31.9484	34.2012	37.0381	38.9938	43.1275	45.1813	48.6433	52.3711	56.5562	59.1368	62.7303	66.9053	71.7994	74.0778	78.5726
	30.3708	30.0469	29.5932	29.8405	28.7555	29.1348	28.3779	28.5481	27.3018	27.1446	27.765	26.6767	26.5053	26.3835	26.3561	26.0018	26.0088	26.0038	25.2729	25.0948	25.6514	25.396	25.1125	24.7655	24.8342	24.6436	24.6815	25.9562	26.5057	27.2911	28.694	30.3905	31.8252	33.3178	35.7279	37.8616	40.8214	42.7439	45.7194	48.0241	51.3614	54.5831	58.1689	60.5062	63.1545	67.2516	70.9059	73.9009	77.6192
	25.12	24.3046	24.457	24.5867	24.1699	24.0758	23.3697	23.4893	22.8935	22.4153	22.7843	22.2841	21.8979	21.771	21.9387	21.5581	21.3659	21.8432	21.4448	20.7389	21.5358	21.0887	20.9428	20.5932	20.5593	20.645	20.7965	22.261	23.3484	23.2755	25.3633	26.9643	28.334	29.9291	32.4554	34.4744	36.8485	39.1626	42.3135	44.9734	48.1072	52.1836	55.2607	57.668	61.3564	66.7876	70.4372	74.2408	78.9297
	16.12	15.845	15.5107	15.8773	15.1746	14.9981	14.9537	14.9802	14.2668	14.1098	14.7308	14.0667	13.6204	13.849	13.8108	13.3644	13.1108	13.6303	13.2566	12.305	13.2026	12.6509	12.9527	12.7518	12.5627	12.9264	12.6497	13.2431	13.5244	13.9836	14.6952	16.0963	16.9268	17.2415	19.515	20.3835	22.1662	23.3718	25.2114	26.5578	28.666	30.7156	32.9352	34.1274	36.6127	38.9144	41.1227	42.8995	45.5769
	19.0004	18.7621	18.4489	18.9836	17.7967	17.9681	17.692	17.5992	17.0249	16.743	16.9898	16.7269	16.0786	15.8821	16.254	15.5862	15.9572	16.2146	15.3608	15.1148	15.7059	15.2399	15.0224	14.6242	14.7463	14.8805	14.3568	15.368	15.5141	15.8789	16.771	17.7276	17.7712	18.1227	19.9112	20.2779	21.9296	21.9593	23.6523	23.9784	25.796	27.5741	29.0953	29.4031	31.1854	33.0938	34.7196	36.2578	38.4127
	19.0151	18.9698	18.7006	18.9813	17.7348	18.388	17.7561	17.6699	16.9338	17.1935	17.3937	16.4328	16.5492	16.413	16.5111	16.0389	15.7088	16.1788	15.494	14.77	15.695	15.4288	15.2029	14.4921	15.0327	14.8736	14.4668	15.2956	15.7887	16.2187	17.1867	18.2226	18.343	19.5513	20.981	21.644	22.6978	23.9526	25.7803	26.6086	28.3169	30.0901	31.6361	31.9923	33.4355	36.21	38.3329	38.9164	41.4606
	29.9804	29.5158	29.6672	29.9018	28.1993	29.3002	28.1243	28.4627	27.745	27.6304	28.1286	27.343	27.014	26.9261	27.0885	26.6756	27.0655	27.3614	26.8762	26.6321	26.6958	26.0779	25.9031	25.6456	25.7719	26.5043	27.2849	28.9979	30.6769	32.3707	35.3195	38.1695	39.477	42.1186	44.5091	46.3213	48.7111	50.3647	51.949	54.1269	56.5604	58.6064	60.3675	61.0183	62.8948	65.5955	67.4619	68.6875	72.0044
	29.3808	28.9282	29.0595	28.8567	27.8229	28.2697	27.6553	27.4765	26.5216	26.7982	27.2283	26.3716	25.8819	25.8103	26.0642	25.3984	25.3949	25.9333	25.0397	24.6156	25.5769	24.6049	24.9369	24.372	24.7044	24.3802	25.1587	26.8381	27.9477	29.7358	31.8974	35.0175	37.4263	39.7645	44.0725	45.9822	49.7107	52.5454	55.8059	58.6482	62.5273	66.1921	70.1863	72.9567	76.1329	80.3496	84.4301	86.8901	90.946
	25.8334	25.6168	25.0466	25.7585	24.4619	25.0707	24.757	23.9779	23.3402	23.5839	23.9567	23.0811	22.6967	22.6731	22.9937	22.3235	22.4501	22.7166	22.026	21.6894	22.354	22.0477	22.184	21.5299	21.9181	21.7739	22.1754	23.7944	24.614	25.2746	27.9571	29.4571	31.556	33.71	37.4145	39.2286	42.6304	45.1871	48.5748	51.5251	55.7239	59.8793	63.0579	65.1847	68.4635	72.9617	76.55	79.7619	84.7886
	24.54	24.1148	23.7994	23.7873	22.9062	23.3263	23.0161	23.3087	22.058	21.8763	22.4172	21.6674	21.5537	21.7836	21.3816	21.1601	21.0617	21.6209	20.8727	20.4867	21.1252	20.634	20.6461	20.5312	20.775	20.9795	20.7882	22.0142	23.3375	23.9524	26.2583	28.2249	29.5615	31.5311	34.4338	35.8657	39.3439	41.2991	43.7297	46.1456	48.7586	51.5278	54.3682	55.7324	58.4164	62.2053	65.507	66.6652	71.4111
	27.3826	27.126	26.6393	25.9186	25.0626	25.898	25.0753	24.8039	24.238	23.7679	24.372	23.9018	23.1867	23.2282	23.5159	22.8537	22.9004	23.6366	22.8898	22.286	23.041	23.2764	23.0424	22.7356	22.7159	22.4356	22.3548	23.9233	24.8742	26.6649	28.2954	30.5255	32.3958	34.5474	38.2431	40.9296	44.4334	47.4813	51.2759	55.3185	59.3827	63.3326	68.4719	70.867	75.0342	79.4147	83.3727	85.8232	91.3467
	22.382	22.1442	22.0676	22.2792	20.8092	21.4308	21.2184	21.0992	20.5582	20.1416	20.84	20.2877	20.093	19.7356	20.0673	19.8398	19.7047	20.3231	18.9686	18.85	19.6324	19.0975	19.1036	18.7026	18.8419	18.821	18.9708	20.8057	21.2437	22.4774	24.2534	25.8574	26.9484	28.303	31.0523	32.2592	34.4202	35.9752	38.7346	40.6805	43.6058	46.4833	49.862	51.3587	54.1547	58.0534	61.2506	63.7359	66.9881
	22.2653	21.8867	22.1882	22.087	21.1658	21.5927	21.1829	20.8658	20.1835	20.4224	21.0403	20.228	19.6927	20.0367	20.3012	19.8977	19.287	20.4387	19.1485	18.9024	19.3657	18.8166	18.7337	18.5726	18.7366	18.7279	19.1152	20.2459	21.0638	21.2106	23.1098	24.331	24.8979	26.3544	28.9622	30.1489	32.6442	33.9474	36.4483	37.8664	41.6068	44.0664	47.2129	48.3653	51.0531	54.7508	57.7938	60.4276	64.2631
	13.2805	13.0681	13.1661	13.1694	12.1222	12.4899	12.3931	12.1622	11.4689	11.9254	12.1615	11.5173	11.1772	11.2225	11.4928	11.2904	11.4933	11.4522	11.0743	10.7513	11.1219	10.4852	10.7455	10.7489	10.5241	11.0056	11.3444	12.3397	13.0819	13.6989	15.3222	16.5974	17.4564	18.5221	20.9665	22.2319	23.8759	25.4923	27.6398	29.6126	32.0649	35.0731	37.8621	40.1759	42.7417	46.7208	49.6086	52.3134	55.6197
	25.2544	25.0272	24.8205	24.8308	23.2708	24.5198	23.6411	22.8558	22.5373	22.4724	22.2297	22.6254	21.5238	21.7265	22.1747	21.2022	20.608	21.3684	20.7522	20.2599	21.2618	20.4244	20.3866	19.8854	19.9444	20.2166	20.2977	21.5246	22.0676	23.466	25.3981	26.8196	28.8716	30.0572	33.4553	35.5298	37.8754	40.5496	42.9395	45.8625	49.4594	52.5818	56.7456	58.7665	61.8988	66.6863	69.5146	71.1839	75.1111
	26.4798	26.432	26.16	25.8434	24.949	25.3639	24.4455	23.9065	23.5971	23.5203	23.8914	23.0507	22.9363	22.5646	22.31	21.9136	21.5982	22.0591	21.5131	20.8679	21.1065	20.6844	20.7902	20.5892	20.5891	20.2642	20.646	21.9251	22.655	23.1095	24.8795	26.4377	27.5768	28.6532	31.1535	32.7421	35.6453	36.3579	39.2725	41.0574	44.3088	46.6074	49.7173	52.0437	54.2852	57.8409	61.0971	63.0791	66.3684
	25.4599	25.1519	24.6251	25.1748	24.1739	24.2074	23.528	23.4717	23.1967	23.1408	23.0509	22.1831	21.677	21.9264	21.8117	21.5685	21.1786	21.7521	20.9823	20.6288	21.2193	20.561	20.1794	20.2779	20.594	19.9585	19.9872	21.3712	21.0768	22.1981	22.9497	23.4128	23.6848	24.9802	26.5267	27.8883	29.5547	30.7667	32.335	33.6816	35.7825	37.8928	39.9499	41.5468	44.3189	46.9095	49.9221	51.8759	55.6674
	25.9936	24.9446	24.2178	25.203	24.4154	24.6556	24.0296	23.7747	23.2735	23.0963	23.882	23.0288	22.4253	22.531	22.9443	22.7591	22.3937	22.6504	22.5905	22.0134	22.0887	21.2603	21.7022	21.2662	21.9011	22.4256	22.7673	24.0034	26.1671	27.1712	30.4331	32.2115	33.7041	35.3556	38.8473	39.9935	42.9835	45.4059	47.8812	50.2715	53.0995	56.6641	60.0796	61.5454	64.9308	68.6395	72.2742	75.178	78.9001
	19.8736	19.8897	19.3074	19.836	18.798	19.8206	18.5967	18.5249	17.7764	18.3994	18.4982	18.2632	17.3807	17.4415	17.7649	16.4819	16.967	17.5606	16.3805	16.2653	16.835	16.5189	16.6264	15.9312	16.514	16.2114	16.6439	17.603	18.4718	19.3683	20.6074	22.0408	23.9036	25.3416	27.3133	29.4302	32.0832	34.0636	35.8875	38.6221	41.3494	43.5234	47.0536	49.5799	51.7559	56.0697	58.4194	61.6384	65.5579
	23.9628	23.7289	23.5446	23.8455	22.6258	22.8635	22.4734	22.5111	21.511	21.6726	21.9759	21.6344	20.8828	20.8298	20.7876	20.5259	20.4018	20.7159	20.0612	19.8618	20.1377	20.0102	19.7821	19.5127	19.5123	19.4431	18.949	20.0112	20.632	20.7747	22.2616	23.1751	23.8185	24.7521	26.8324	27.8231	29.3988	30.9261	32.2887	33.9904	35.8307	38.1943	40.1271	40.7106	42.6668	45.4212	47.3154	49.1515	51.7609
	25.8092	25.8514	25.9499	25.4775	24.5891	24.7276	24.5253	24.0526	23.4613	23.2761	23.8538	22.9159	22.5424	22.0779	22.3953	22.1641	21.8615	22.2067	21.3856	21.3185	21.584	21.0998	20.6635	20.5903	20.8549	20.4889	20.2685	21.0629	21.9945	21.5366	22.8185	23.9105	24.7439	24.6965	27.1204	27.7149	30.2528	30.9972	33.4017	34.5301	36.7231	39.2923	41.2495	42.3647	44.47	47.9069	50.6965	52.7363	56.6855
	23.5565	23.2433	23.1371	23.2508	22.0915	22.3049	22.0459	22.0111	21.2222	21.4457	21.5524	20.8989	20.9204	20.2384	20.5286	19.4742	20.1686	20.058	19.6745	19.5302	20.0143	19.1536	19.3075	18.8565	19.0089	19.2873	19.0042	19.9262	20.4454	21.1449	22.1673	23.0889	24.1533	25.1142	27.1648	28.3202	30.1762	31.3083	33.4391	34.677	37.4883	39.7014	42.1937	43.7609	46.6176	50.4219	53.5326	56.5818	60.6138
	22.1016	21.6858	22.0733	21.856	20.7578	20.9237	20.4598	20.3491	20.0037	19.7518	20.0801	19.8237	19.3785	19.5232	19.1935	19.3904	19.2684	19.5977	19.0369	18.7244	19.1902	18.5219	18.4991	18.5055	18.6513	18.7645	18.9754	20.4043	21.3266	22.0779	24.3546	26.2772	27.2381	29.3119	31.986	33.8766	36.6969	38.5645	41.3359	43.4819	46.5781	49.2075	52.2464	54.0942	56.8348	60.1888	63.3117	66.1833	69.8917
	31.2554	31.162	30.5747	31.2905	29.645	30.441	29.7877	29.4722	28.5655	28.438	29.0346	28.5375	27.713	28.176	27.6838	27.4629	27.3986	27.7536	27.0767	26.4962	27.1795	26.277	26.0337	26.2684	26.5459	26.2301	25.8184	26.3453	27.4943	27.6242	29.2321	30.5024	31.2656	31.7442	34.0782	34.1113	36.3751	37.0536	38.6453	39.8838	42.0547	44.1735	46.5545	48.638	50.4856	53.3804	56.7053	59.1655	62.7127
	31.4562	30.8569	31.0914	31.1723	29.6893	30.0474	29.5111	29.5339	28.842	28.3613	29.2456	28.0648	27.8862	27.6332	27.7145	27.4646	27.4891	27.6114	26.402	26.4425	27.175	25.9926	26.5136	25.6372	26.1094	25.818	25.3984	26.588	27.3665	28.0079	29.0226	30.84	31.2434	32.1284	34.5089	34.815	37.2504	37.6954	40.0263	40.8795	43.4163	45.7319	47.8794	49.3191	51.4583	55.369	58.2879	61.821	65.0535
HEK IP3R1 shRNA	11.3555	14.253	18.3262	15.2681	15.5832	13.4427	13.654	12.6803	14.8414	17.1574	15.0783	18.6017	13.3778	15.958	21.232	18.3474	16.1921	19.1384	19.3079	22.6204	22.0204	22.2321	23.2803	19.786	18.691	38.048	34.1684	31.671	35.2886	29.0943	44.0746	38.2284	39.6374	38.1775	39.6098	43.4437	43.3734	48.6287	48.4731	50.2908	51.4852	55.5414	57.7324	59.9297	62.5512	69.7168	70.0973	68.9443	69.0985
	17.6022	21.0964	24.9897	22.5311	22.776	20.1956	20.3289	20.1554	21.6302	23.9249	21.3964	25.3371	19.8672	23.2642	28.1259	25.507	22.7128	26.0137	26.4408	29.752	29.4612	29.634	31.2736	27.5694	26.1296	30.6587	25.5473	23.7566	26.6799	27.5422	36.1462	30.4574	31.3368	29.8296	31.4314	34.5499	35.8187	40.6767	41.0703	42.8868	44.2146	49.3144	51.8497	54.9465	57.4956	65.2593	66.215	65.3652	65.9853
	22.2951	26.42	30.424	27.2873	27.886	25.6345	25.2231	25.424	27.4243	29.9452	26.8558	30.6746	25.2808	29.1157	34.3381	30.2298	27.1938	31.1438	31.341	35.1397	34.6574	33.9093	35.4612	32.1522	30.2341	35.0782	30.4438	27.7774	30.7106	29.9073	39.3878	33.7907	35.124	33.5305	34.5462	37.5036	38.8566	42.9758	42.8963	44.3902	46.5204	50.5942	53.362	56.4818	59.585	68.1065	68.8148	68.9683	70.6706
	21.5601	25.3664	29.4185	25.9726	26.6407	24.662	24.3818	24.1475	26.7424	29.2592	26.4499	30.2919	24.5549	28.556	33.5316	29.2178	26.8659	30.1473	30.0136	33.7445	33.1444	32.5693	34.949	31.3921	29.4097	34.0595	29.1535	26.8887	28.6985	32.2578	38.845	32.4996	33.6484	32.1639	33.4826	36.4983	37.307	41.5904	40.9013	42.6198	43.8928	47.8789	49.8691	53.4826	56.0986	63.8476	64.4949	64.9668	66.8588
	19.7341	23.1329	27.4619	24.4647	25.1424	23.0785	22.2121	22.6085	24.5616	27.0563	24.6135	28.0235	22.5069	25.7465	30.9668	27.3571	24.2413	27.8525	28.1713	31.8399	30.948	30.863	32.3476	28.5386	27.0559	31.1596	26.4144	24.6352	26.5954	34.0871	37.0609	31.4188	32.2993	31.6909	32.06	35.4036	35.7541	40.4493	40.0863	41.3944	43.1579	47.5856	49.6053	52.976	55.8567	63.3351	63.9664	64.3316	66.4148
	20.1625	24.2799	28.6237	24.9526	25.9795	23.3497	23.2425	23.1968	25.3513	27.9687	25.3938	29.2321	23.834	27.1372	32.3959	28.3019	25.4133	29.0625	28.9859	32.9011	32.4893	31.9063	33.5814	30.027	28.3364	33.434	28.2191	25.5368	27.3059	24.2469	35.6481	29.5081	30.4082	28.3607	28.9281	31.5989	31.9758	35.5409	34.8051	35.2606	36.5758	39.7703	41.5314	44.6552	45.6331	53.9927	54.2402	54.0998	55.1078
	12.6581	15.9786	20.0277	16.8578	17.2116	15.3104	15.0962	15.0718	17.0557	19.7228	16.8873	20.107	15.1094	18.5997	23.5631	20.0927	17.9169	20.5057	20.7411	24.8175	23.7872	23.7103	25.0614	22.0285	20.0312	23.4916	18.7203	16.5356	18.3755	20.5506	26.7783	20.2956	21.3023	19.572	19.3302	21.8712	21.6543	24.6431	23.854	24.5922	25.3309	28.3176	29.2426	32.6374	33.4576	40.9897	41.0064	41.0393	41.8513
	16.934	20.3987	24.5153	21.4158	22.0653	20.0832	19.2471	19.5837	21.5513	24.3476	21.7502	25.3819	19.875	23.7337	28.5898	24.8218	22.5552	25.4845	25.3756	29.0901	28.8699	28.4286	29.8425	26.2435	24.2104	29.7438	24.6296	22.9065	24.2994	19.8101	30.8246	25.8838	26.2514	24.3459	25.6879	27.869	27.9745	31.8125	30.4774	31.2969	32.5519	35.3859	37.8119	40.8999	42.2659	48.7365	48.5976	49.1729	49.8439
	17.9288	21.0549	20.8274	17.4388	16.2998	20.1443	18.1241	18.7491	19.8836	17.7558	20.8509	20.1605	19.5503	25.421	22.9432	23.7482	19.9952	31.2359	28.2563	21.4476	20.449	29.1526	29.5958	28.7397	28.8872	20.8145	21.176	18.9852	23.3508	27.3443	24.4197	21.2468	23.3929	23.2167	24.9138	23.4212	22.6375	21.3613	30.9326	38.8056	34.1695	39.5236	44.6418	50.0407	50.7854	56.8147	60.7288	65.5879	67.0259
	6.62415	10.7778	9.63718	6.5055	5.67286	8.66789	7.00075	7.37524	8.74905	7.15872	9.11028	9.08763	7.86019	13.8522	11.8123	12.5184	8.62057	18.3916	16.159	9.8202	9.30836	16.8466	17.569	17.1532	17.426	9.34622	10.4553	7.35975	12.2303	15.6981	12.6522	10.1761	12.3769	13.0281	14.1937	13.3526	12.2406	11.5025	20.6704	27.9765	24.0708	28.8514	34.2228	39.1881	40.2544	45.9059	48.8876	54.16	54.6044
	16.8859	20.9344	20.144	16.8093	15.7758	19.0692	17.0811	17.7914	18.8066	17.3845	20.3005	19.954	18.9564	24.838	23.0419	23.7581	19.3519	30.2941	27.5237	20.9411	19.4409	28.4131	29.3462	28.3892	28.7796	19.9622	20.4609	17.9597	23.8771	27.3485	24.1913	21.493	23.5798	23.7565	24.9465	24.5215	22.416	21.6006	30.8989	38.5235	33.9961	39.8198	44.5055	49.6895	50.6389	56.6336	59.4361	64.4625	66.1136
	19.6268	17.7648	18.0425	19.2205	17.1187	17.8204	17.9971	17.4614	17.1681	16.4226	14.4672	14.1713	15.3943	15.216	17.0802	14.7064	16.1432	14.9679	16.0507	15.2507	16.9341	15.2015	14.5308	16.716	15.6628	17.1352	18.8556	18.88	20.3759	22.3138	23.2271	25.6844	25.7529	27.3963	28.7657	31.1279	32.708	33.6074	32.926	36.3935	38.226	41.8424	46.139	46.9941	50.6453	51.435	54.5885	58.2412	61.2679
	24.2427	21.4832	21.0938	22.7663	21.0675	20.556	21.681	22.0108	21.1701	20.5682	19.6871	17.593	20.5718	20.944	20.898	20.4483	21.3741	20.1707	20.4598	20.2838	21.8532	19.9543	18.5664	20.5415	19.4906	21.7759	24.0991	23.719	25.5948	27.1267	27.7768	29.4225	31.1529	31.3561	32.9513	35.3427	37.6638	38.799	36.823	40.0246	41.9994	44.6383	47.4667	47.1779	50.8451	50.1093	51.3407	54.9005	55.4894
	24.5872	22.9969	21.9615	23.6659	22.6035	22.8415	22.7561	23.4023	22.3883	22.1621	20.6884	19.0432	20.7261	21.7197	21.4828	21.1614	21.6089	20.4825	21.1024	20.6138	22.408	20.4305	19.0818	20.9066	19.7819	21.4713	24.3081	24.7381	25.6353	27.8348	30.4241	32.8094	34.3656	35.1425	37.2895	39.8419	42.0061	42.7062	42.0149	44.3191	46.4126	49.5857	52.4756	52.4382	56.0759	54.6287	55.7123	56.7703	57.608
	15.9827	14.839	14.1041	15.4185	13.7628	13.4811	14.2142	14.1497	13.5626	13.1958	11.5697	10.9921	12.4871	12.4268	12.3806	11.6183	12.1695	12.0256	12.0842	11.7574	14.0369	11.5409	10.5785	12.3806	12.0029	13.3862	16.0288	16.362	18.0215	19.8756	22.4103	25.0486	26.4345	27.6508	30.0981	32.5372	34.9953	36.6763	36.3661	40.0313	42.6966	47.5009	52.4102	53.7995	59.1823	59.7963	63.5962	68.1693	70.7736
	14.4617	13.1781	12.9287	13.5727	12.7863	12.5555	13.002	12.9198	11.857	11.3365	9.74291	9.01327	10.9336	11.08	11.6509	9.81328	10.6488	10.2304	10.2238	10.4874	12.3501	10.0834	9.37025	10.3955	10.4381	11.7607	14.6467	14.0422	15.5448	17.57	19.0931	21.5163	22.7116	24.1938	25.6824	28.4667	30.5731	31.5447	31.1912	33.8392	36.2803	39.7945	43.5031	44.8129	50.6695	51.8839	54.3597	58.937	60.8576
	17.6219	16.0454	15.6317	16.3551	15.2409	15.307	15.5951	15.3296	14.795	14.3408	13.1756	11.7954	13.5506	13.2875	13.6264	12.9323	14.1274	12.4196	13.0152	12.9492	15.1022	12.492	12.1016	13.417	13.0367	13.5857	15.979	15.8693	17.5338	18.0348	20.6028	22.749	23.9658	24.2414	24.8926	26.718	28.6431	29.1068	27.8409	30.9265	33.1019	35.6352	39.61	40.1454	43.5847	44.2567	47.2745	50.4514	53.694
	29.6504	28.3968	27.4692	29.4643	27.8117	27.3295	27.9455	27.9021	26.9945	26.5703	25.4548	24.3623	26.1215	26.1786	27.3998	25.0555	25.8149	25.6498	25.7645	26.1259	27.951	25.8371	24.5552	26.4771	26.8322	28.1415	31.1828	31.001	32.5319	33.4005	34.9395	37.029	37.6593	39.1608	40.8081	42.6938	43.8234	45.0084	44.7114	47.6087	48.5981	52.5403	56.0892	57.744	62.5986	62.7991	64.9034	69.3274	71.2785
	14.8146	13.1385	12.9701	14.4218	12.7824	12.5223	12.9564	13.1198	12.6927	11.7096	10.8822	8.74501	11.0225	10.9202	11.5015	10.4846	10.5893	10.2338	11.0868	10.6729	13.254	10.7238	10.3962	11.4508	10.9993	11.8558	14.1933	13.8299	15.5286	17.6565	19.462	21.7649	23.1312	24.0976	25.8388	28.5136	29.9979	30.5794	29.7908	32.8497	34.6059	38.1408	41.5153	42.3196	46.7432	46.6272	50.1569	54.6641	57.3237
	18.6478	17.3383	17.0382	18.4204	16.9848	16.9266	17.3866	17.6577	16.6871	16.1869	14.8631	13.487	15.7531	15.4135	15.999	14.6101	15.6926	14.9638	15.7171	15.4167	17.0419	15.9595	13.3246	16.1486	15.5185	17.2431	18.6198	19.0694	20.8615	23.2693	24.6631	26.8839	27.8944	28.9206	30.6836	33.4737	35.0163	36.2958	35.2851	38.8604	40.6921	43.758	47.61	48.7926	53.3068	53.4281	56.8388	60.5331	64.4873
	12.3878	12.0065	11.9355	13.0362	11.4381	12.1208	11.6897	11.3805	11.2982	10.5292	9.02768	7.84713	10.1609	10.3969	10.2286	9.09748	10.5241	9.84333	9.93112	9.71784	12.3906	10.3499	9.01431	9.97579	9.83584	11.0893	13.2119	12.9088	14.5112	16.2466	16.4854	18.7237	19.1802	19.7424	20.1634	22.6084	23.8079	23.8279	22.9214	24.8174	27.0366	28.9222	32.0711	32.455	34.8678	34.8555	37.2411	40.1073	42.5743
	16.0469	14.2417	13.8547	14.8777	13.3873	13.8385	13.5884	13.8677	13.0217	12.6088	10.807	9.61472	11.7928	12.5336	12.4652	11.8371	12.1973	11.5095	11.6658	11.2788	13.9106	11.3931	11.0254	12.6293	11.883	13.195	15.9201	16.2399	18.1497	20.2196	21.8808	24.139	24.9596	26.5464	28.5284	32.2423	34.4745	35.7934	35.9888	39.6544	43.0657	46.8334	50.2118	52.79	57.4675	58.2137	61.2121	65.4048	68.647
	5.13248	4.1727	3.96294	5.44199	4.21706	3.71197	3.63491	3.79636	2.64535	2.25241	1.45276	0.290911	2.21998	2.3128	2.22629	1.17581	2.38326	1.17625	1.37296	1.31517	4.19309	1.90251	0.378221	2.27818	2.24248	2.78146	5.49481	5.49456	6.14073	7.71424	9.29148	11.0053	12.0659	12.561	14.3396	15.8598	17.6492	18.1555	17.5329	20.3356	21.739	25.0717	27.1889	29.1517	32.2351	32.2095	34.5929	38.8327	40.6577
	12.2062	10.5266	10.2023	11.5226	10.7786	10.495	10.6071	10.0129	9.06927	8.52474	7.6387	7.06125	8.18048	8.59939	9.9111	7.95865	8.92737	7.5077	7.38656	7.37802	9.1285	7.26249	6.75058	7.89419	7.32883	8.9419	11.0077	11.6111	12.8536	15.5897	16.8596	18.481	20.3012	21.7442	23.6725	26.2827	29.3358	30.411	30.3306	34.5464	36.1118	40.0198	44.8172	45.5032	51.0849	51.5487	55.1234	58.7528	62.0697
	26.2782	24.2554	25.0575	26.1902	25.78	25.364	24.7021	25.7801	24.0593	23.6763	21.1395	20.3095	22.1105	21.6836	21.3859	21.1211	22.8489	20.4163	22.28	22.4831	22.8687	20.4644	19.6736	21.2998	21.2802	22.504	24.6698	24.6339	25.7156	28.2155	29.5098	33.2859	34.1023	35.0333	38.5424	40.4618	43.4338	46.662	46.2353	50.5085	54.9055	58.5367	64.6369	66.5614	70.8375	71.5565	77.9073	82.8382	85.7739
	25.1234	23.6635	23.1296	24.9031	23.5404	23.6635	23.9292	23.8396	22.565	22.4496	20.9456	19.3958	21.316	21.8326	22.2607	21.5923	22.0635	21.639	21.6912	21.2505	23.4717	21.0743	20.0649	22.1318	22.148	22.9806	25.0787	25.1237	25.4319	28.0896	28.7716	30.4434	31.0399	31.9963	32.7924	34.3228	35.6187	36.1457	35.0153	36.4849	38.3897	40.5084	43.396	44.2435	47.5322	47.1163	48.9816	52.9585	54.7077
	17.8977	17.207	16.9642	17.3889	16.0467	16.3301	16.4544	16.729	16.0404	15.3972	14.7935	13.0612	15.1122	15.6413	16.0016	14.9162	15.2812	14.8484	15.1202	16.0542	17.5994	15.5379	14.3609	15.9984	15.7584	15.3416	17.2151	18.2448	19.4444	20.3196	21.468	24.4963	25.024	25.5067	26.3695	28.3046	29.8984	30.7973	30.0166	31.5716	33.494	37.1977	39.0971	39.2612	43.2159	42.507	43.9148	47.4378	48.4602
	29.219	27.2355	26.3306	28.3397	27.1465	27.0954	26.4769	26.9863	26.0705	26.3726	24.1625	23.0535	24.3726	24.6457	25.4643	24.0504	24.6827	24.3553	24.853	24.2365	25.8106	24.6933	23.4309	25.8185	24.8489	26.1072	27.4915	27.7136	28.2734	30.1688	31.7127	33.56	33.0887	34.5617	36.6304	38.3245	39.5847	39.5721	37.9285	40.1596	41.5954	44.373	46.2255	47.1525	50.5	49.9841	51.7754	54.4129	57.4732
	24.9475	23.983	23.3614	24.4235	22.9907	22.7065	23.2951	23.4986	22.7195	22.0517	20.8692	20.2184	21.5316	20.9028	21.9544	21.0034	21.806	20.9965	21.3634	21.6891	23.8456	22.075	20.7036	21.7219	21.8812	22.4931	24.8441	24.8511	25.8157	27.0474	28.8952	29.9432	29.2839	30.4984	31.9983	32.5928	33.9975	34.81	32.7797	34.5431	36.0589	38.6992	40.2301	41.8696	44.0888	43.8481	45.2116	48.103	51.0028
	24.5485	23.5613	22.8107	23.4104	22.7326	22.9072	21.8716	22.824	21.9816	21.8711	20.5366	18.526	20.1655	20.7613	21.6608	19.9077	20.6938	20.0133	20.6503	19.7554	23.7406	20.3722	19.9651	21.0339	21.0285	21.3705	23.6828	22.8484	24.0394	26.0895	27.5113	27.9877	27.9433	29.2352	30.0802	31.6591	32.3277	32.458	30.9026	32.5822	33.7368	35.7217	38.5963	37.4551	41.3372	39.5858	41.7853	44.6385	46.3944
	22.4651	20.7264	19.8338	21.4447	20.7394	20.2598	19.9724	19.8009	19.8439	18.7268	17.7157	16.2472	18.5263	18.028	19.069	17.879	18.4828	17.2793	18.1801	18.7933	19.765	18.4433	17.2991	19.2921	18.6762	20.0082	22.1776	21.041	22.2682	23.3091	25.1386	26.0936	25.8499	27.0483	27.5577	30.1091	29.4354	30.2779	28.6876	30.6941	31.8544	33.6581	35.2293	35.4944	38.5673	37.7072	39.1034	42.055	43.8701
	19.4578	18.8325	17.4179	18.9907	17.7528	17.1407	17.7629	17.8475	16.8419	16.0721	14.9755	13.3901	15.5277	15.978	15.8172	15.338	15.993	14.9748	15.3745	15.5144	16.9225	15.5616	14.7139	15.766	15.2484	17.6108	19.8634	19.9239	20.9378	22.2243	23.7683	25.8213	26.3163	27.3586	28.1241	30.4545	32.1174	32.0823	30.7825	33.7371	36.158	38.6963	41.6985	42.6225	46.9242	46.8752	48.5553	52.8499	54.0078
	30.6262	28.5112	28.451	30.7448	27.7316	28.3074	28.4269	28.5632	27.4083	27.4428	25.8519	24.4656	26.3965	27.3329	27.8932	25.6464	26.4497	26.2971	27.0476	26.693	29.6148	26.8133	25.1278	27.4635	26.9996	28.3338	30.9085	30.3231	31.1083	32.7951	34.5722	36.2001	35.07	36.2422	37.5633	37.7277	39.3232	39.7149	37.7464	39.5503	40.4485	42.9582	45.1636	44.5322	47.1626	45.7121	46.5286	48.9759	50.0046
	22.44	21.576	19.849	21.5889	20.1483	20.9346	20.5518	20.8881	20	19.5017	17.7684	16.6501	18.3984	18.8594	18.8821	17.9267	18.9469	17.5463	18.3111	17.8293	20.4239	17.9645	16.6566	18.4444	17.957	19.4782	21.2089	21.2064	22.6439	23.9949	25.408	27.3171	28.1424	28.056	29.7763	31.8358	33.264	33.1624	32.3745	34.7072	36.7437	39.0827	42.0081	42.4966	47.0315	46.0516	47.6131	51.7362	53.1515
	17.2026	15.9755	15.1295	16.3614	15.2496	15.0018	15.9034	15.2682	14.4334	14.5408	12.823	11.4064	13.0494	13.6842	13.7209	12.63	13.3143	12.6125	12.8933	12.4324	14.7212	12.6191	11.7979	12.8544	12.6598	14.7739	16.1146	15.9558	17.0689	18.1639	20.3524	21.4426	21.6996	22.6581	23.8498	25.158	26.7384	26.5656	25.1964	27.4067	29.5472	31.8719	34.6622	35.5574	39.1239	39.1337	41.0172	44.8961	46.6698
	19.0428	17.057	17.4602	18.4081	16.8511	17.2044	17.1701	17.2556	16.6856	16.2737	14.9088	14.0219	15.4692	15.7669	16.5407	14.4611	15.8172	14.7467	14.8311	14.6675	17.6841	15.521	14.008	15.1245	14.8952	16.7736	19.3433	18.3472	20.444	21.7641	22.5119	25.479	24.8123	25.8647	27.0836	28.5711	30.8147	31.125	29.2113	32.0845	34.0146	36.9946	39.8605	40.2379	44.5097	44.233	47.6843	50.6014	53.3318
	12.6458	11.2542	10.1937	11.4606	10.6396	10.8353	10.8095	10.3502	10.0943	9.474	7.97104	6.67138	8.5865	8.78636	8.79995	8.09202	8.98734	7.42531	7.83413	7.44277	10.0425	7.43404	6.90257	8.32523	8.68866	9.63488	11.1311	10.9706	12.0013	12.6079	15.215	16.2062	16.6362	17.9263	17.7931	19.7241	21.7232	22.2024	21.1542	22.7666	25.3586	27.0684	30.4084	31.4194	34.1018	34.0769	36.7988	40.7887	43.0639
	30.7702	30.5324	29.2077	29.8308	29.6419	29.0943	29.079	29.5561	28.5501	27.9815	26.6606	26.1525	26.8327	27.4143	28.2862	27.2691	27.5372	26.6387	26.7695	26.9427	29.43	26.6354	25.5985	28.6702	27.2279	29.2828	31.9241	31.2584	31.7679	34.311	35.1682	37.735	37.749	40.3263	41.5936	43.7374	44.7602	45.2976	44.4958	46.0633	49.9376	52.2438	54.8523	55.1027	59.2213	60.3158	62.484	66.1382	68.0135
	17.5214	16.343	16.0551	17.3763	15.9983	16.5489	15.8344	16.4455	14.9351	15.263	12.8641	11.6589	13.7536	13.1047	13.9993	12.3152	13.7616	12.9395	12.8887	13.4396	14.9424	13.5804	11.6682	14.3638	13.4063	13.9221	16.5042	16.2355	19.0212	20.7457	22.7791	23.4983	24.565	25.5021	27.7869	30.5828	32.321	32.4479	31.6357	35.2672	37.5316	40.6989	45.0842	47.1496	51.0357	53.1303	55.9585	59.8805	63.1619
	22.5345	21.4766	20.8562	21.9025	20.4743	20.0374	21.333	20.3335	19.4879	19.627	17.7217	16.8012	17.6255	18.0219	19.0499	17.8092	17.8166	17.7105	17.5452	17.842	19.3784	18.3425	17.263	17.6108	18.3726	18.4119	21.0145	21.1342	22.6177	24.6815	25.4664	27.8084	28.9584	29.8572	31.5439	34.2282	35.0672	35.7733	34.9002	37.6227	40.2968	42.9039	46.8443	48.4451	52.1751	51.949	54.9142	59.0446	61.197
	31.9986	30.6262	29.234	30.4388	29.6613	28.9414	29.1859	28.9169	27.8633	27.1824	25.1044	22.9203	24.8171	26.2378	26.0133	24.5507	25.3924	24.3042	24.7827	24.4782	26.6044	24.7606	23.3586	25.4942	24.4019	26.3536	28.1947	28.3685	29.7874	32.0722	33.9248	35.5873	35.3414	37.4794	38.8253	41.3446	43.4921	45.9456	43.7563	47.7425	49.2208	51.7259	56.0176	57.1241	62.2799	64.2173	66.1793	70.7763	73.0133
	37.1288	35.535	35.5407	36.5652	35.7478	35.5766	36.1386	35.8424	34.215	33.5621	32.1022	31.4242	33.1448	33.5333	33.6609	32.3052	33.1967	32.339	33.0192	32.6081	35.0154	32.7934	32.1824	33.983	33.49	35.0073	37.7305	37.0956	38.4696	39.9769	41.5403	43.5702	43.6776	44.0005	46.2111	47.6221	49.2577	49.9226	48.3627	51.0663	52.5218	55.5554	58.9157	60.7553	64.3024	64.0203	66.5421	70.6233	72.4533
	36.1357	34.0666	32.7583	34.4801	33.8968	33.4522	33.829	33.8576	32.2893	32.0105	29.7725	29.3927	30.7726	30.8355	31.5854	30.0796	30.4719	30.7032	30.2941	31.7825	32.956	31.1652	30.0282	31.4429	31.1684	32.4313	34.9894	34.6033	35.8465	37.6518	40.33	42.4842	42.2122	43.3169	44.695	47.3523	48.2789	49.111	47.5069	50.1778	53.1994	55.2301	59.2939	60.2253	65.0612	65.2043	68.6478	72.8878	75.808
	39.3862	39.0438	37.5198	39.8491	38.0368	37.5559	38.8311	38.3307	37.2323	36.9689	35.6246	34.0773	35.355	35.7559	37.1315	36	35.8775	34.5639	35.3078	34.4544	36.7738	34.7971	32.9373	35.7464	35.4939	36.7154	39.4277	39.0122	40.2601	42.388	43.0671	45.4514	45.491	45.7684	48.6299	49.2586	50.2689	49.9846	48.87	51.3409	51.7279	54.3863	56.5606	56.935	61.0486	59.9397	61.1768	64.7817	67.6919
	26.226	26.906	23.4803	26.2348	25.7183	25.308	24.3675	24.9275	23.6741	23.2848	22.9166	20.6611	22.7613	22.4227	22.7507	22.2887	22.7836	22.3115	22.3572	22.9426	23.3653	22.1847	21.205	23.5915	21.798	24.1484	27.1695	26.5266	28.0262	29.5971	31.6602	33.232	34.251	35.9023	37.2571	40.4404	42.093	41.3135	41.5602	45.2256	46.2437	50.4369	54.5986	55.4062	58.0303	61.0965	63.7173	67.703	73.1885
	24.5272	25.0173	23.8007	24.3328	24.3009	24.4518	24.082	24.3313	24.7933	24.0276	24.0389	24.4157	24.0369	23.3712	24.1173	23.8701	23.2373	23.3078	23.6062	24.2474	23.7507	23.6031	23.6267	24.1655	23.8338	24.1058	24.8218	25.1461	26.3416	27.7298	28.7246	29.4333	31.0701	32.4624	34.0287	35.9398	37.2113	39.9079	41.9839	44.1841	45.6485	47.3704	50.8489	52.0467	54.6319	57.4313	58.6354	61.6314	62.3396
	23.5425	23.5522	22.9712	23.1166	23.3709	23.22	22.5101	23.1352	23.4769	22.9313	23.2027	23.1195	23.0115	22.6683	22.5415	23.1561	22.4504	22.462	22.8579	23.5839	22.8198	22.7558	22.5298	23.1366	23.0143	24.2763	25.0287	25.7178	27.6771	29.4546	30.1693	31.6707	34.0315	36.6539	38.8261	41.8556	43.6843	47.1709	50.7526	53.8824	56.4354	58.7824	62.6214	64.6722	66.5072	71.0243	72.6542	74.5429	76.4107
	34.4076	34.5082	33.3475	34.2432	34.3111	34.0238	33.5919	33.9738	33.8929	33.8089	33.821	34.2524	33.7338	34.1383	33.793	34.4072	33.4336	33.7414	33.9482	34.2893	33.5164	33.7566	33.9322	34.536	34.4343	33.7868	34.2593	34.2292	35.608	36.6643	36.8567	36.9309	37.9833	39.2965	39.7957	41.2563	41.4044	43.528	44.4462	45.8081	46.086	46.3236	47.7729	47.6174	47.8934	49.2111	49.0564	49.1544	49.0298
	35.2582	36.0184	34.8794	35.4372	35.5524	34.8754	35.0867	35.1561	35.2536	35.1531	35.162	34.9608	35.1549	35.0458	34.8751	35.0035	34.2531	33.8053	34.7917	34.9422	34.268	34.4289	34.5623	35.1933	35.3625	36.4924	37.6199	37.6513	38.9298	40.8204	41.487	41.6781	43.374	44.6736	46.4145	47.1293	48.5921	50.6947	52.2724	54.5499	55.775	57.2301	59.3696	59.5218	61.2495	63.4866	64.7694	66.2436	66.5181
	36.2042	36.7878	35.2786	36.2536	35.9149	36.3075	35.7785	36.3605	36.266	36.2188	36.1085	36.3856	36.2688	35.9957	35.8612	36.3342	35.3504	35.6679	36.4256	36.5784	35.5477	36.2023	36.1534	36.8586	36.4514	37.6004	39.4176	40.6894	43.0315	44.8279	45.9839	47.6763	49.5735	51.2029	52.382	53.9834	55.7257	58.0645	60.5457	62.2666	63.9153	64.7007	66.8662	67.7084	69.3916	73.4167	74.9097	77.3506	78.7913
	19.1535	19.3176	18.3936	19.3283	19.322	19.8324	19.0875	19.454	19.397	19.3298	19.4115	19.3546	19.5833	19.2703	19.1926	19.533	18.9339	19.2504	19.9831	20.7711	20.3245	20.1974	19.7369	21.2811	20.8666	21.0057	21.706	22.0629	24.4514	26.3592	27.1233	28.7776	31.4016	33.7964	35.5508	38.2392	40.6816	44.1949	46.4559	50.2008	52.8291	54.5288	58.382	60.2566	62.1788	66.3616	66.9826	68.9531	69.8402
	16.5954	16.6198	15.5634	16.1947	16.1177	16.5837	16.0151	16.0602	16.3735	16.12	16.2481	16.3776	15.9717	15.6489	15.9549	16.2836	15.0342	15.6612	16.1422	16.3443	15.5656	15.9428	16.0407	16.9196	16.103	17.7861	19.4691	20.3963	22.7604	25.4894	26.8587	28.5608	31.2034	34.3347	36.5305	39.4556	42.0532	45.6797	48.8351	53.0853	55.5184	57.8235	61.5861	63.5589	66.514	69.9623	72.8321	75.1863	76.3048
	20.1218	20.0925	18.8195	19.964	19.7009	19.9451	19.8377	20.0178	19.7947	19.2146	19.6754	19.9712	19.6649	19.1798	19.3121	19.7249	18.2126	18.6822	19.9619	19.8302	18.9525	19.5792	19.4407	19.9155	20.1103	20.792	22.6994	23.4984	25.1951	27.279	28.1162	29.545	32.4062	34.6261	37.0172	39.089	41.2308	45.4847	48.6856	51.967	54.994	58.1953	61.4845	64.5625	67.4616	70.4448	74.6484	76.7815	78.4199
	21.526	21.1003	20.2126	21.2255	21.2527	21.0102	20.8117	20.8043	21.1158	20.3017	20.4491	21.1794	20.3068	20.3144	19.9642	20.7089	19.6012	20.0339	20.5059	20.6959	19.7587	20.6201	19.7124	20.7911	20.4721	21.765	22.8951	23.1905	25.9312	27.6796	28.268	30.1337	32.7844	35.5567	37.6376	39.2834	41.8594	44.8549	47.007	49.0381	51.4544	52.6629	56.0798	56.0005	58.4371	60.7099	62.6989	63.9721	64.5175
	20.9492	21.3112	20.2115	21.9619	21.0733	20.9476	20.8736	20.3662	21.2362	21.1107	20.4188	21.8245	21.3925	20.9866	21.6982	21.7049	20.7743	20.6889	21.1832	21.813	20.879	21.7725	20.7735	22.0123	20.9809	22.3814	23.6121	24.9256	26.6426	28.734	29.798	31.047	34.1801	36.5533	39.1613	41.245	42.9177	46.1095	49.157	51.8363	54.0987	55.7745	58.4628	59.7162	62.1558	64.8301	65.9573	67.4024	68.7543
	21.7702	22.1174	21.5011	21.2507	21.1614	21.3368	20.8548	21.2562	21.3255	21.0496	20.7621	21.2555	20.8852	20.4636	20.9961	21.6184	19.969	20.3741	20.7936	21.3629	20.0329	20.5761	20.9018	21.2583	21.0872	21.8864	23.0889	23.6517	26.0984	28.507	29.3845	31.6105	34.6544	37.7453	39.3967	41.7746	44.9808	48.2014	50.6801	52.9268	55.5679	57.4876	60.9451	61.9453	63.5825	66.4625	68.1906	69.5718	70.0153
	18.8171	19.1457	17.7928	19.0565	18.9443	18.7058	18.5999	18.9313	18.982	18.5559	18.3975	19.0367	18.4352	18.3264	18.0825	18.9443	17.6972	18.07	18.4066	18.6802	18.0058	18.3742	18.1635	19.2312	18.6312	19.9612	21.2354	22.1024	24.068	25.6533	26.6775	28.2799	30.8407	32.8302	35.0036	37.4251	39.8178	42.4409	45.638	48.1963	50.2921	52.1176	55.8617	57.3224	58.7105	62.1014	63.7208	64.7507	66.1288
	7.76838	7.81066	6.92108	7.50183	7.57694	7.75565	7.18358	7.49223	7.09541	7.43889	7.0075	7.07247	6.73972	6.72207	6.76445	6.94621	6.10886	6.42121	6.75806	7.25497	6.77064	6.63589	6.93127	7.40219	7.25962	7.58707	8.09869	8.24279	9.94486	11.2275	11.4806	12.5712	14.4429	15.7387	17.4476	18.7222	20.2848	22.9029	24.4593	26.9561	28.6964	30.2666	33.3972	34.7745	36.3587	39.7105	41.298	43.7257	44.5657
	11.8609	12.0776	11.1432	11.7049	11.5714	11.6611	11.4799	11.759	11.4998	11.1963	11.6959	11.6555	11.4898	11.225	11.4116	11.317	10.9095	10.9805	11.5621	11.8295	11.1813	11.4969	11.2019	11.9239	11.6155	13.0976	14.8032	15.5021	17.7992	19.2391	20.7809	21.8858	23.9244	26.6982	28.0667	30.2875	32.0874	34.6114	36.6309	39.6344	40.4425	41.486	44.4232	45.6004	46.1735	49.3911	50.055	51.3332	51.62
	12.5006	12.5977	11.1482	11.9874	12.0091	12.1964	11.3557	11.5239	11.8895	11.7871	11.6514	11.6538	11.6739	11.0619	11.1537	11.2882	10.7063	10.9925	11.5048	11.8453	11.2728	11.4102	11.2381	12.0086	11.1381	13.1423	14.7275	15.3002	17.7852	19.882	21.2382	22.2783	25.3059	27.6304	29.553	32.4793	33.4416	36.5009	38.8805	41.895	43.1584	44.9016	48.148	48.9024	50.3604	53.3617	53.9672	56.051	56.133
	20.6346	20.0945	19.3411	20.0403	20.0929	20.1323	19.9537	19.5635	19.8429	19.933	20.065	19.9237	19.2488	19.5312	19.7558	20.0365	19.1695	19.1026	19.9875	20.1882	19.6846	19.8342	19.3132	20.4816	20.3903	21.032	21.7437	22.6843	24.6889	26.4258	26.7751	27.5361	29.8136	31.8666	34.0893	35.5908	38.1071	40.882	42.9437	45.5307	48.4615	49.9463	54.5705	56.6855	59.5053	63.4573	66.444	67.5645	70.4172
	21.1475	21.0916	20.0385	21.0915	20.8427	20.6401	20.6014	20.6211	20.9519	20.4541	20.0321	21.0021	20.7802	20.028	20.2322	20.4255	19.8921	20.5503	20.1217	20.6309	19.8297	20.5983	19.9101	21.1545	20.55	21.842	22.7298	23.2745	25.2337	26.8358	27.9489	29.4403	31.9139	33.5953	35.5973	37.9527	40.1542	43.6212	46.1862	49.9345	51.8266	54.5411	57.6961	59.6428	62.9468	66.183	68.3658	70.5248	72.5298
	16.1383	16.2605	14.8415	15.6646	15.4137	15.7073	15.2386	15.5686	15.5326	15.1808	15.4103	15.397	15.468	14.8379	15.1487	15.1851	14.4225	15.1119	15.2845	15.7256	14.923	14.915	14.6411	15.8897	15.4365	16.6776	16.9862	17.6478	19.3772	21.0663	21.8866	23.0262	25.3429	27.3591	28.921	30.798	32.8881	35.7074	37.547	40.4547	42.3606	44.2775	47.169	48.3088	50.6488	53.9375	56.1755	57.1712	59.0611
	6.53882	6.29525	6.06691	6.31885	6.08667	6.37186	5.94728	6.14289	6.10785	5.70159	5.65228	6.20768	6.54609	6.26998	6.70465	6.53747	6.16187	5.9942	6.92261	6.78772	5.9666	6.14115	5.92337	6.9455	6.67571	7.29461	7.96104	8.78268	9.77051	11.5171	12.166	13.3696	15.7468	17.5853	19.4225	21.0203	23.2579	25.7685	27.9371	30.4226	31.9734	33.1637	35.8102	37.7337	38.1881	41.637	42.5181	43.2511	44.4078
	21.9795	21.5362	20.3811	21.5986	21.6507	21.3597	21.0088	21.5532	21.215	20.7707	20.759	21.7371	21.2321	21.2207	21.5369	21.6129	20.7577	21.121	21.2534	21.5521	22.0195	21.9578	21.6781	22.5915	21.9572	22.5671	24.0061	25.3966	27.0952	29.0065	30.6947	32.3865	35.5622	38.3823	40.5484	43.3489	46.4807	50.3279	53.1135	56.4529	58.512	60.4495	64.6708	65.9995	66.9557	71.6118	73.1887	73.9848	75.7386
	13.7976	14.0731	13.3161	13.9506	14.0031	13.7607	13.88	14.087	14.0834	13.3888	13.5007	13.9062	13.7188	13.0547	13.4862	13.6635	12.365	13.0215	13.7272	13.8095	13.2495	14.1299	13.265	14.2939	14.0464	15.0527	16.0112	16.8491	18.7029	20.7704	21.7628	22.9037	26.1953	28.9042	31.468	33.9226	35.7362	39.4091	42.1214	44.9284	46.4564	47.9269	51.0407	51.3397	52.7333	55.7309	57.0078	59.4538	58.7843
	14.9515	14.8455	13.9859	14.8094	14.7913	14.8139	14.3246	14.3306	14.4285	14.5038	14.747	15.1589	14.8996	14.2557	14.4425	14.8107	13.9567	14.0771	14.7744	15.1448	14.068	14.7655	14.5629	14.9432	14.8633	16.0147	16.5177	17.3146	19.2743	21.1016	21.8255	23.2536	25.5675	27.6033	29.9271	31.2482	33.6342	36.481	38.9104	41.9688	44.0454	45.4375	48.7784	50.8259	52.7815	56.4329	57.9793	59.1259	60.3669
	28.604	28.3253	27.5106	28.1193	27.8748	28.2271	27.7411	28.2026	27.764	27.5506	27.3638	28.1154	27.8033	27.1493	27.0261	27.4965	26.2453	26.7177	26.581	27.7441	26.8798	27.2957	26.9552	28.0017	27.647	30.5627	32.835	34.1556	37.5965	40.0979	42.305	43.5793	47.5753	50.5692	53.072	55.5521	57.8745	61.1323	63.6089	66.5262	67.9867	68.9924	71.5957	71.2724	71.4805	72.5919	72.4181	70.9615	69.3984
	23.2476	23.5584	22.0962	23.7146	22.9131	23.4842	22.8723	23.2949	22.9214	23.067	23.0192	23.0824	22.7664	22.4289	22.5033	22.4533	21.756	22.7131	22.7238	23.1049	22.5223	22.6934	22.3366	23.6931	22.8392	24.2487	25.2604	25.2464	26.9521	28.9297	29.704	30.586	33.3171	35.1304	36.7091	39.1189	39.8305	43.3534	44.795	47.6149	49.5661	50.5137	54.0104	56.1647	57.7501	61.5448	63.5455	65.4117	66.7146
	21.5595	21.4376	21.0574	21.7499	21.0861	22.0394	21.1046	21.4357	21.3459	21.051	21.759	21.506	21.4109	21.3144	21.5118	22.0833	20.6503	20.8841	21.6209	22.1864	21.839	22.2086	21.4641	22.1586	22.3169	22.8777	23.4313	23.5785	25.8777	27.1843	27.46	28.541	30.3614	31.6556	32.7531	34.6322	35.7893	38.7336	40.5378	42.6927	43.3933	45.2209	48.67	50.0087	51.521	55.5873	56.9598	58.9762	60.0901
	15.0128	15.4395	14.5258	15.0885	15.4089	15.0415	14.9868	15.7371	15.2439	15.4059	15.4685	15.6188	15.0701	15.4516	15.1616	15.6898	15.0927	15.6714	16.4016	16.6292	16.6762	17.0601	16.9425	17.6146	18.1316	18.6083	19.8713	20.6212	22.689	24.4454	26.3187	27.8008	30.6329	33.5832	36.007	38.851	41.0341	45.2306	49.4944	53.5835	55.5068	58.5518	62.6947	64.7351	67.7206	71.7543	73.587	76.0533	76.2523
	25.1218	25.5103	24.5089	25.5687	24.9258	25.3405	25.0925	25.4268	24.768	24.8839	24.832	24.9149	24.6423	24.6208	24.4323	24.8025	23.8513	24.4736	24.8426	25.274	24.5501	25.4835	24.2676	25.9163	25.3161	26.2319	27.276	27.9401	30.1834	32.0033	33.0256	34.7116	37.5809	39.8321	41.6129	44.7738	46.6046	50.9652	53.595	57.5797	59.8655	62.4729	67.4549	70.0139	73.2275	78.3206	81.1726	83.1184	84.8756
	49.8084	48.8611	47.5577	47.9332	47.7233	48.429	47.7578	48.8081	48.2762	48.6686	48.0859	48.5818	48.3361	48.0323	47.7523	47.2598	46.863	46.1175	47.7293	48.5031	47.6747	48.1112	46.7166	48.3283	48.0779	50.4288	53.1615	54.8246	57.7557	62.2838	63.2577	66.1104	71.3712	74.4622	76.6318	79.7693	83.3525	84.3212	88.1272	91.0137	91.2205	92.8794	95.1894	94.8258	95.9335	98.6896	98.8948	100.324	100.543
	30.3648	29.54	28.7896	29.9823	29.332	29.7258	29.1426	29.6912	29.8692	29.5198	29.023	28.7944	29.0456	28.4191	28.5204	27.9583	27.7547	27.8464	28.1335	28.8753	27.7008	29.0641	28.4059	29.0115	28.723	31.8473	34.2681	36.7649	41.1284	45.2949	48.1609	51.0727	54.2954	58.6295	60.717	64.419	65.7997	68.9681	71.0124	72.8778	74.3061	74.8779	76.3257	75.8072	75.0808	75.9711	74.7206	73.9866	72.3753
	24.8737	25.1161	24.4644	25.3661	24.7206	24.8691	24.0761	24.4105	24.3273	24.1467	24.0875	24.0632	24.0247	23.7956	24.3446	24.1232	23.4166	23.475	23.9898	24.4799	23.9792	23.8624	23.9157	24.4595	24.341	26.7319	28.1043	29.4323	32.8459	35.6243	37.6684	40.1083	42.9824	45.6514	48.1622	50.8768	52.6142	56.379	58.1823	61.2344	62.9066	64.2615	67.6148	68.0754	68.3413	71.096	72.0267	71.8492	71.3398
	15.0597	15.2829	13.8225	14.9441	15.2183	14.7994	14.3177	14.7333	14.7367	14.2197	14.4525	14.6039	14.4773	14.3218	14.4316	14.9246	12.7728	13.8872	14.5976	15.1771	14.1358	13.7742	14.2716	15.1487	14.4461	15.2296	16.4532	17.2853	19.2142	20.9183	21.9822	22.884	25.7486	26.7825	28.1305	30.5504	31.8417	33.9797	36.3577	38.196	38.877	40.1768	43.4803	43.4983	45.0953	47.6733	49.3953	50.6641	51.5864
	17.7597	18.1185	16.6559	17.7679	17.3404	17.7523	17.054	17.0414	17.3742	17.3421	17.0848	17.6287	17.2687	16.6897	16.8087	17.3821	16.3822	16.7848	17.0324	17.6895	16.8157	17.3631	16.603	17.6014	17.6772	18.5148	19.7279	20.4804	22.9504	24.2762	25.4831	27.1295	29.4639	31.2395	33.6506	35.5544	37.5331	41.3474	43.5707	47.045	49.03	50.707	53.681	54.9345	57.419	61.2039	62.3256	64.1723	64.6304
	21.8356	22.119	20.746	21.638	21.7432	21.6705	21.1733	21.7944	21.2483	21.3783	21.4584	23.0543	23.2704	23.2896	23.6139	23.267	22.5541	22.8521	23.148	24.0102	22.8575	23.5239	23.5855	23.9115	23.6769	25.008	26.198	26.8845	29.1383	30.8249	31.9313	32.7579	35.192	37.52	38.7931	41.5517	43.4012	46.7318	48.7089	51.9038	53.613	55.5274	58.6716	59.6974	62.4419	64.9407	67.0984	68.82	69.1679
	12.7726	13.2678	12.5711	13.1657	13.0614	13.077	12.7665	12.8576	12.7331	12.9759	12.6612	12.7374	12.5039	11.8045	12.5275	12.3622	11.6257	12.1578	12.2254	12.4993	12.0956	12.1906	12.1962	12.3652	12.4975	13.4419	13.3505	14.215	15.7673	17.1302	16.7114	17.5758	18.967	20.4306	21.0864	21.6754	22.8749	24.0268	24.9399	25.9709	27.4741	27.4606	28.8108	28.4969	29.1813	30.9864	32.0572	32.5245	32.6833
	19.3352	19.5555	18.7712	19.582	19.4948	19.3726	19.1502	19.5785	19.1245	19.2256	19.4862	19.4442	19.4236	18.7529	19.2989	18.8352	18.298	18.8634	19.2586	19.6363	18.7877	19.3208	19.201	20.0791	19.4302	20.632	21.656	21.9254	24.1779	25.7705	26.7978	27.9802	30.0703	32.1798	33.6908	36.0026	37.3617	40.3688	42.5141	45.611	46.9487	48.6067	51.5837	53.6099	55.171	59.0156	60.5623	62.5391	63.6558
	21.8834	21.8745	20.6081	21.5636	21.5569	21.5168	20.9902	21.0249	21.2382	21.6635	20.8318	28.6768	33.5722	36.0128	36.6423	37.6812	36.1077	36.177	36.9136	36.4554	35.9441	36.2598	35.8022	36.9711	35.5883	39.1839	42.2198	45.144	49.5378	54.3735	57.4706	60.786	67.1229	70.7245	74.8477	78.312	80.7748	86.28	88.8407	91.4313	92.8603	92.7076	96.3978	96.0502	95.9636	97.3183	97.4746	97.78	95.9622
	30.6763	30.8853	29.8597	31.3303	30.3276	31.27	30.1305	30.6745	30.4266	29.8481	29.8149	30.6945	30.0164	29.3184	29.5684	29.5123	28.5643	29.0182	29.6366	29.5248	28.8738	29.6518	29.6652	29.5828	29.6175	31.0472	32.2368	32.988	35.1655	37.2285	38.4047	38.9829	41.4343	43.1931	44.8778	46.3733	47.7673	50.823	53.2632	55.5414	56.518	58.3038	60.9052	61.1699	62.9054	66.8188	67.5137	68.2134	68.7991
	18.8552	18.8751	17.9549	19.2296	18.5464	18.3609	18.3485	18.2512	19.0593	18.4423	18.5012	18.4822	17.9631	18.0155	18.028	17.8552	17.3006	17.493	18.5037	18.3179	17.8298	18.0573	17.7609	18.6711	17.8501	19.9678	20.7404	21.3036	23.5171	24.9955	25.9758	27.4349	29.7861	32.2284	34.6559	36.198	38.5928	41.9526	44.7719	48.015	49.9455	52.0907	56.683	58.2835	60.7992	65.4608	67.8864	69.0183	70.9681
	30.0434	29.8906	29.0485	30.0778	29.3239	29.835	29.2987	28.8698	28.8328	28.8376	28.5507	29.5434	29.572	29.085	29.2033	29.1434	27.9647	28.4796	29.0967	29.4742	28.9689	29.2653	29.0215	29.3758	28.8865	32.0004	34.3494	36.2331	39.7678	41.5994	43.8784	46.0174	49.4526	52.0023	54.4009	57.1281	59.1985	62.9581	65.8932	68.0813	70.7007	72.7792	75.4816	77.0345	78.7411	80.4454	80.266	80.7398	80.0153
	30.2829	30.6602	30.0426	30.7042	30.6997	30.396	29.6465	30.1544	30.2534	29.8317	30.1226	30.4287	30.5228	29.6996	29.4447	29.9917	28.5953	29.3456	29.422	30.5375	29.2671	29.578	29.2908	30.3262	29.2133	32.8688	35.1932	36.7101	40.6965	43.0264	44.7417	47.1039	50.3246	53.3032	55.7432	58.1743	60.2476	64.2615	67.0932	70.1509	71.8255	74.3321	78.2984	78.7277	79.5285	83.1084	82.9397	83.036	83.5128
	15.4613	15.324	13.7776	14.6055	14.8543	14.6224	13.7494	14.5734	14.8276	14.3088	14.0406	14.2394	14.2226	13.5921	13.8602	14.9006	13.2923	13.9865	13.9659	15.1077	14.1027	14.2788	14.4252	14.5278	14.0952	16.1571	15.942	16.4762	18.8822	20.2178	21.5415	22.6171	24.6219	26.6862	28.813	30.7578	32.1454	35.0084	38.1314	40.9402	43.3159	43.8375	47.381	48.7744	50.0794	53.2589	54.6785	56.0234	56.8666
	16.3932	16.4802	15.7262	16.3988	16.4217	16.5402	15.8236	16.1568	16.4439	16.063	15.9312	16.347	16.3182	15.1656	15.6299	16.3287	15.1067	15.2238	15.357	16.2527	15.5815	15.4835	15.4467	16.0169	15.8995	16.5962	17.4521	17.2177	18.5883	19.4978	19.6994	20.1343	21.1736	22.2889	23.0151	23.804	24.7024	26.4367	27.5582	28.6701	28.514	29.3058	31.0563	30.9608	32.4284	34.0099	34.8026	35.3058	35.8496
	21.5949	21.9479	20.8816	21.3895	21.4494	21.3529	20.8708	21.3681	21.6041	21.4178	21.3863	21.5788	21.6614	20.5551	21.4058	21.9254	20.6129	20.7143	21.657	21.8232	20.9984	21.7498	21.2695	22.6539	21.6429	23.0812	23.3885	24.0188	25.8765	27.1352	27.5195	28.6336	30.489	31.8383	32.9362	34.8533	35.9278	38.3695	39.1746	40.5693	41.6498	41.9317	44.1569	44.9503	45.6605	47.6449	48.6826	49.5687	50.0151
	20.1813	20.6616	18.8567	19.8422	19.838	19.8518	19.4911	19.5891	20.1857	19.6767	19.34	19.5962	19.5276	19.4665	19.0866	19.8331	18.9217	18.7491	19.5807	19.6305	19.155	19.6283	19.1931	20.2375	19.6843	20.6686	21.7821	21.6805	23.4137	24.5257	25.3436	26.109	27.7419	29.2636	30.2425	31.67	32.7678	34.7371	36.5155	38.7131	39.7794	40.3739	42.8222	43.6883	45.217	47.9262	49.472	50.9486	51.9842
	25.7173	25.8012	24.9677	25.7967	25.7056	25.6377	25.4001	25.5404	25.8755	25.0807	25.3722	25.7381	25.1079	24.5915	25.4841	25.5562	24.5722	25.0456	25.2755	26.0778	25.4586	25.528	25.6283	26.3975	25.2814	26.9414	28.7146	29.5375	32.5314	33.6654	35.3654	37.18	39.7707	42.1592	43.9988	45.9689	48.6344	50.6594	53.8011	56.3556	58.3282	59.4811	63.1353	64.5434	65.4992	69.6395	70.3613	72.0261	73.6392
	37.9482	37.6675	36.7775	37.9162	37.1874	37.6253	37.3979	37.8899	38.0383	37.7266	37.859	37.8403	37.6425	37.6019	37.4592	37.2086	36.1431	36.741	37.7485	37.8681	37.3738	37.9309	37.6103	37.8084	38.0826	39.302	40.8162	41.5678	44.046	45.7349	46.4447	48.0004	50.4664	52.595	55.5435	58.0627	60.1132	63.0984	66.4445	69.2651	72.06	73.8857	77.7389	80.3129	82.2608	87.2521	88.9734	91.4658	92.4732
	31.2876	31.8246	30.6982	32.0502	31.8693	31.8078	31.5299	31.9713	31.665	31.7324	31.5089	31.945	31.292	30.6021	31.5613	30.8829	30.344	30.735	31.5554	31.7976	31.0526	32.451	31.1979	32.2253	31.5721	33.3538	34.5933	35.1413	36.8726	38.4257	39.5824	41.009	43.334	45.4909	47.7421	50.0883	51.9504	55.6387	58.4175	61.6655	63.7136	65.4013	69.4923	71.9822	74.1265	78.8644	80.7298	83.1328	85.243
	24.6941	25.2042	24.1987	25.5016	24.9882	24.6887	24.3662	24.9457	24.7338	24.7624	24.3755	25.1241	24.6488	24.4518	24.664	24.6085	23.3404	24.3503	25.1371	25.4351	24.3845	25.2903	24.7995	26.115	25.2096	26.2366	26.9269	27.231	29.6509	31.7145	31.7496	32.926	34.9485	36.8667	38.4834	39.3185	41.4435	44.9021	46.6349	48.9743	50.3742	51.0858	54.9419	56.6655	57.4691	61.0245	64.2209	65.739	67.7336
	28.0422	27.7145	26.816	27.8133	27.7363	28.2094	27.2777	27.4667	28.0536	27.2157	27.8702	27.6119	28.0068	27.1539	27.0019	27.0169	25.9947	26.7179	27.2268	27.7278	27.1882	27.2548	26.5117	27.5244	27.8275	28.1896	29.5857	29.9289	31.2066	32.7947	33.5779	34.8922	36.7977	38.4885	39.6381	41.497	42.7051	45.4902	47.7926	49.8803	51.324	52.3311	55.587	55.3745	57.1971	60.4806	60.989	62.2537	63.164
	25.3075	24.5797	25.1645	24.6203	26.0037	25.4197	25.1411	25.6873	25.4231	24.1691	24.7805	24.7842	24.7083	25.5086	25.2148	25.3252	25.9341	24.5075	25.7124	25.1859	25.0429	25.6279	25.7649	25.3443	25.9767	25.2421	25.5135	26.6983	27.6848	28.2486	29.563	29.0711	30.5869	32.9905	33.3997	34.2056	36.0217	38.1081	39.2351	40.8559	42.5387	44.1903	46.135	48.2019	49.4737	51.3858	54.7089	56.6959	58.2365
	31.174	30.2245	30.9692	30.4632	31.3636	30.7092	30.7934	31.0096	30.7051	30.1252	30.6235	29.8379	30.3122	30.5764	31.1148	31.0768	31.3716	30.8644	31.2333	30.6388	30.7195	31.1979	31.8425	31.0253	31.6915	30.6093	31.8892	32.8628	35.1908	36.7013	38.3898	39.425	42.4163	45.1708	47.3493	49.2739	52.6867	55.5308	58.1148	61.2501	64.9064	67.1831	71.5281	75.7262	77.562	80.9677	86.1789	90.1204	92.1603
	43.8769	43.1239	43.7655	42.7304	43.8851	43.6347	43.9753	43.9616	43.1755	43.3389	43.214	42.4168	43.0284	43.8631	44.2928	44.5476	44.051	43.7708	44.5656	43.6414	43.5371	44.2684	45.2937	43.8052	44.2171	43.4046	44.8591	45.9218	48.3275	49.5646	52.3732	52.3093	56.056	58.4416	60.4998	62.9052	67.2392	69.4717	72.442	74.7277	77.031	80.1013	83.0976	86.2776	87.8958	90.324	94.6024	98.1171	99.2192
	29.1657	28.3313	29.2907	28.1893	28.921	28.9113	28.5902	29.1173	28.0886	28.0133	28.736	28.052	28.354	28.641	28.7202	29.0945	29.4123	28.3376	28.9331	27.9219	28.5821	29.0933	29.8427	29.1652	29.592	28.6217	29.0191	30.5267	32.351	32.8957	34.6306	34.5395	36.2084	38.6391	39.9975	40.9376	43.5481	45.5172	47.4698	49.2968	51.4264	53.9681	57.0442	59.2251	60.2758	63.286	66.9878	70.91	72.2868
	34.9092	34.6728	34.9191	34.0633	34.6217	34.0493	34.0377	35.0438	34.1439	33.8998	34.4194	33.6527	33.8086	33.9808	34.5414	34.5389	34.3161	33.0898	33.8525	33.7001	33.3674	34.5251	34.9117	34.4975	34.7203	34.5541	36.3795	38.2586	40.7022	42.7549	45.9246	47.3095	50.7238	53.4731	56.9526	59.5916	63.3435	66.8259	69.836	73.1222	75.7605	78.6228	82.1371	84.4073	85.0406	86.2705	89.8865	92.4505	93.1417
	35.2395	34.2357	34.6393	34.3489	34.6901	34.0507	33.972	34.8679	33.9876	33.7759	33.6885	33.5138	33.6615	34.1795	34.1844	34.7108	35.195	34.1877	34.8381	33.787	33.8387	34.2965	35.1342	34.5821	35.0534	34.5545	35.146	36.3599	39.1156	39.6059	41.9058	42.1393	44.5094	47.5145	49.1945	51.2499	54.6063	56.467	59.6515	62.1924	64.7661	67.8958	71.5428	75.5758	77.2646	80.218	83.9389	88.0966	90.3424
	33.0621	32.1944	32.836	31.8635	32.7096	32.43	32.5084	32.9072	32.2256	32.0034	32.159	31.8643	31.9249	32.8778	32.3597	33.4377	32.9713	32.2988	32.8329	32.0823	32.3397	33.3992	33.3522	32.5931	32.4625	32.7062	33.7867	34.4386	37.0916	38.1301	40.6392	40.7517	43.1941	45.2387	47.8496	48.7322	52.3151	54.7734	57.564	60.5625	62.5109	64.737	69.6807	73.9895	75.5507	78.978	84.0152	88.3372	91.179
	36.4921	36.1703	36.7789	36.0654	36.6036	36.2218	36.2784	36.6261	36.2874	35.3361	35.8251	34.7797	35.221	35.9554	36.1688	36.2392	36.8261	36.0603	37.248	36.0208	36.1189	37.0877	37.2488	36.594	36.925	37.6604	38.0038	39.6542	41.6662	42.6073	44.7428	45.2338	46.5765	49.7968	51.3982	53.1439	55.769	57.9963	60.0719	63.4163	66.0462	67.6798	72.2153	75.0564	77.6475	80.104	84.8907	88.9775	91.5706
	28.7389	27.4546	28.5633	27.2443	28.4254	27.8783	27.9526	28.2092	27.4044	26.767	27.0938	27.2409	27.7133	28.1581	27.9452	27.7206	28.7605	27.5877	28.6927	27.4689	27.7841	28.5627	28.678	28.1318	28.3697	27.7202	28.9514	30.6918	32.9436	34.7607	36.2491	37.3094	39.5257	42.4898	44.6531	46.5004	49.7086	52.2602	55.6889	58.7962	61.1542	64.4785	68.357	71.201	73.8149	77.2678	81.9845	85.5859	87.1964
	34.9287	33.7652	34.4608	33.8668	34.5246	33.5662	34.1466	34.2911	33.7693	33.1263	33.8708	33.3292	33.9544	34.4024	34.5159	34.5761	34.6802	33.9865	34.4944	33.8635	34.0617	34.5935	34.701	33.7254	34.7114	34.0167	34.2407	35.718	36.6549	37.3463	38.5813	38.5811	39.4838	40.8986	41.6106	42.5274	43.2496	44.5575	45.2434	46.0513	47.1488	46.8828	49.4827	50.299	50.0856	51.7473	53.3567	55.1613	55.2284
	31.3223	30.2544	30.8378	30.3639	31.3405	31.143	31.3124	31.6069	30.9158	30.2695	31.0643	30.2784	30.7886	31.1216	31.3678	31.567	31.9667	31.1663	31.188	30.9978	31.4824	31.7004	32.0898	31.3008	32.0493	31.5211	31.9421	32.8998	35.2216	35.3901	37.1916	37.2075	38.9256	40.4787	41.5667	42.7425	44.796	46.4183	47.9693	49.9367	51.6057	53.2596	55.4534	57.5658	58.1663	60.4182	64.0699	66.7433	69.4167
	28.5311	27.621	28.2047	27.704	28.8872	27.5452	28.19	28.7487	28.2506	27.4444	27.8862	27.6117	27.8075	27.7691	28.28	28.8183	28.7724	27.9275	28.571	27.8161	28.1091	28.3258	28.281	27.7509	27.7265	28.5269	29.2051	30.707	32.4083	33.4913	35.6119	36.1718	38.4422	40.6702	42.4634	44.2221	46.9467	48.8262	51.6965	53.8012	56.0904	59.0079	62.9489	65.6134	68.1909	71.0854	75.6396	78.8057	81.1325
	29.538	29.0982	29.7468	29.0202	30.3809	29.3826	29.5268	29.697	29.674	29.4046	29.6326	29.1048	29.5995	29.8955	29.4685	30.0224	29.9594	29.2329	30.1779	29.0321	29.2216	29.7621	30.1392	29.7852	30.362	29.9692	31.0699	31.9589	34.341	35.5815	37.8144	38.6465	41.1465	44.0331	45.9803	47.978	51.0803	54.0308	57.4705	61.2349	63.8315	67.975	72.5097	76.0409	77.953	82.1917	85.9838	90.247	93.8856
	31.6382	30.5923	31.5812	31.0823	31.1675	31.5737	31.2353	30.9968	30.6324	29.8725	30.1014	30.2505	30.6704	31.0543	31.311	32.3478	31.6599	31.2565	31.5048	30.9374	30.4134	31.504	32.2932	31.4771	31.3063	30.9447	31.4475	31.9734	33.5463	33.6917	35.0631	34.5112	36.3274	38.6052	38.951	39.9073	42.2664	43.4574	45.1257	46.4591	48.1298	49.5377	52.5274	53.494	55.6277	58.5002	62.0407	64.4292	66.5103
	32.1727	31.1127	32.2312	31.517	32.2574	31.9987	32.0662	32.1091	31.9662	31.5	31.9901	31.2892	31.5586	32.0068	31.9358	32.4218	32.6797	32.4238	32.5457	31.8882	32.6114	32.974	33.2044	32.4131	32.9774	32.9309	33.9465	34.5988	36.4715	37.2685	39.3305	39.3322	41.1167	43.5303	45.3266	46.2405	49.2938	51.2539	52.9458	55.8871	57.6414	60.3946	63.5612	66.2392	68.652	71.1493	75.6164	79.2325	81.8877
	34.5142	33.296	34.3798	33.3712	33.987	33.3446	34.0216	34.5299	33.3339	33.0781	33.2232	33.1496	33.3705	34.2272	33.8931	34.6742	34.8982	33.729	34.4243	33.8043	34.8394	34.4995	35.4035	33.8932	34.873	35.4329	35.3579	36.3059	38.1839	39.1367	41.1163	40.7061	41.7098	43.674	45.3293	46.5782	47.8313	49.9446	51.7504	54.1147	55.3256	57.1867	60.4944	62.6147	63.9832	66.2516	69.7429	72.9485	74.773
	32.095	30.6224	31.8454	30.9352	31.7425	31.4005	31.6935	31.6371	30.9642	30.4097	31.1183	30.6998	30.8274	31.6376	31.7875	31.9195	32.3833	30.5805	32.0276	31.2667	31.4405	31.6294	32.1737	31.8396	32.3194	32.0603	33.6697	34.8843	36.5276	37.5009	40.1394	40.6711	42.6994	45.4907	47.5835	49.8063	53.1339	56.518	58.9697	62.5756	65.8757	69.1068	73.1948	76.158	79.0861	82.9038	87.17	91.3637	94.546
	33.0498	32.3036	33.2909	31.9691	33.207	33.2922	32.9884	32.9407	32.766	32.2175	32.7557	32.3796	32.4395	33.2565	33.2472	33.5843	33.6682	32.8066	33.3923	32.9273	33.0562	33.1581	33.8355	32.4567	33.7142	33.4371	34.1699	35.3114	37.1415	38.1861	39.8506	40.7846	42.7371	45.136	47.7789	49.5576	52.1369	55.1106	58.7137	61.3653	64.3261	67.0643	71.5904	75.1568	77.6785	81.3031	85.6157	90.7991	93.81
	28.0417	27.3567	28.4248	27.3374	27.7852	27.1221	27.578	27.6366	27.2828	27.3093	27.4228	27.2246	27.5845	27.8108	27.5453	28.3058	28.0573	27.582	28.09	27.3268	27.539	28.3583	28.6014	27.0188	27.6189	28.2898	29.2041	30.5143	32.7221	33.969	36.032	36.2269	38.5501	41.7901	43.9551	46.0527	49.0384	52.4465	55.8035	58.2895	62.2708	65.9133	69.9054	73.7019	77.0062	80.4038	85.0691	90.1003	93.7432
	23.1311	22.6844	23.0279	22.8618	23.1094	22.3658	22.9589	23.437	22.6275	22.0832	22.7793	22.021	22.2579	22.7508	22.9211	23.3375	23.0894	22.258	22.9329	22.5006	22.3949	22.768	23.4788	23.0953	23.1953	22.9036	23.7471	24.5623	26.6237	27.967	29.3701	30.3153	31.7653	34.5689	36.0751	37.5046	40.3345	42.7982	45.023	47.9512	50.656	53.4267	57.0125	59.7899	61.4269	65.0441	69.2657	73.051	75.2958
	28.5887	27.6501	28.3976	27.5278	28.1693	27.598	27.9655	28.4495	27.6461	27.3059	27.7161	26.8533	27.8705	28.153	27.7485	27.7779	27.8448	27.013	28.3531	27.5232	27.6714	28.0758	28.9803	27.3689	27.4165	28.1468	29.5127	30.7058	32.234	33.7251	35.5577	36.1563	38.0166	41.1217	42.783	44.4898	47.3314	50.1704	52.9686	55.4355	58.207	61.0972	64.8914	68.3594	70.2163	73.3968	79.6083	82.4034	84.9189
	22.738	21.8859	22.4474	22.3726	23.0206	22.7293	22.7758	22.5984	22.3285	22.1598	22.3416	22.3189	22.6165	22.8102	23.0287	23.7145	23.5067	22.2413	23.1282	22.6595	23.1055	23.3325	23.6485	22.5559	23.5725	23.2969	24.123	25.0752	26.9298	28.1708	30.0785	30.2458	31.6425	34.84	36.4162	37.3528	39.7695	41.6716	43.5926	46.2451	47.4812	49.4553	52.7446	54.9141	55.9158	57.8893	62.2633	64.6297	66.3235
	27.6949	26.8702	27.5208	26.4269	27.4124	27.5873	27.8749	27.6079	27.2555	26.9547	27.4139	26.5154	27.0828	27.3562	27.9551	28.1788	27.8906	27.1676	28.1469	27.4136	27.8635	28.0133	28.2241	27.6243	27.9017	27.8811	28.7851	29.6758	32.2925	32.5653	34.5928	34.6684	36.9687	38.6645	40.7332	41.9889	44.2946	46.969	48.5975	50.4577	52.7662	55.0439	56.9196	60.4822	61.5163	63.7702	67.3368	70.585	71.2758
	26.8953	26.0102	26.8597	26.4408	26.8107	26.1943	26.8455	26.5327	26.5253	26.1735	26.3838	26.1484	26.0899	26.2707	26.0925	26.7668	26.4826	26.2775	26.7187	25.7081	26.5796	26.5974	27.0493	26.2771	26.3807	26.7133	27.6666	28.7857	30.7388	31.8854	33.9615	34.6331	36.5501	39.317	41.0941	42.9967	44.2903	46.5531	48.2623	50.5469	51.5939	52.4061	54.9763	55.7115	56.9166	56.8629	59.4543	61.3232	61.8457
	30.075	29.1319	29.8687	29.3681	30.7197	29.5148	30.1713	30.1366	29.6409	29.4227	29.8939	29.4101	29.6358	30.4841	30.3719	30.6373	30.4202	29.7776	30.4303	29.6729	30.5052	30.3874	30.9384	30.506	30.7269	31.3165	32.5968	33.4776	35.3073	36.6061	38.7816	39.6079	41.9776	44.7272	46.5166	49.1486	53.2266	56.226	59.251	62.8888	66.2095	69.8629	76.3164	81.3227	86.8709	94.0688	101.04	109.435	117.498
	33.1208	32.5955	33.0062	32.6891	33.9203	33.3575	33.2722	33.7484	33.003	32.1792	32.9608	32.3921	32.4986	32.8865	33.5516	33.0027	33.1743	32.4894	33.2222	32.4653	32.9875	32.9633	34.2303	33.0175	33.7461	33.7001	35.054	36.3362	37.3702	38.5284	40.4991	40.6068	42.7211	45.2367	46.9792	48.3372	51.1873	53.7732	55.9456	58.7219	61.3792	64.3524	67.6872	70.6003	73.238	77.1364	81.6738	85.5193	88.3718
	34.4519	33.342	33.8561	33.3252	34.5157	33.7433	33.7203	34.226	33.7932	33.4139	34.0763	33.8626	33.6292	34.2631	34.2645	34.4281	34.4611	33.6866	34.4644	33.901	33.5346	34.1714	34.9163	34.0384	34.2411	34.4729	34.8699	36.0285	37.6129	38.1962	39.9557	39.7155	41.1139	43.3556	44.8742	45.4361	47.8723	49.2578	51.3747	53.4907	55.2885	57.1047	61.0764	62.7111	64.3519	66.7761	71.5595	75.2178	77.5838
	37.352	36.2796	37.1176	36.4877	37.5784	36.7635	37.4783	37.0711	36.9128	36.6685	37.1309	36.0459	36.7426	37.4704	37.7202	38.271	38.0175	37.2825	38.1039	37.152	36.5148	38.0143	38.4093	37.4183	37.7609	37.6794	38.9988	39.8666	41.1453	42.043	44.1142	43.952	44.9753	47.7697	48.613	50.1373	52.3207	53.8265	55.9034	57.5503	59.1643	61.7256	64.9012	66.9876	68.7022	71.5703	76.0414	79.0829	80.9646
	34.763	33.7218	34.2336	33.3364	33.9888	33.5584	33.5219	34.1459	33.6854	32.6651	33.5081	33.316	33.4122	33.7247	33.8921	33.9299	33.9446	32.8733	34.1089	33.1537	33.44	33.5771	33.8016	33.2036	33.4839	34.6936	34.9945	35.7452	37.5035	38.9114	40.5864	40.962	42.9959	45.8624	46.8782	48.6731	50.4643	52.139	54.52	56.9831	58.6603	60.6087	63.5857	66.3472	67.4132	69.6548	73.0397	75.3542	76.1299
	36.2377	35.1149	35.8578	35.3965	35.9871	35.5147	35.5025	36.2879	35.5844	35.4997	35.4561	35.2129	35.4736	36.0846	36.047	36.1744	36.5394	35.6201	36.2497	35.2954	35.3912	36.4046	36.8864	35.7014	36.0854	36.0424	36.4487	37.372	38.9618	40.5999	42.1012	42.2513	44.0215	46.9937	48.5903	49.9074	52.7295	55.55	56.4968	58.5697	61.3864	63.4129	66.7683	69.3284	70.8567	73.5522	77.733	81.2179	83.404
	37.4222	37.1264	37.5694	36.919	37.8738	37.1879	37.4252	37.4399	37.2237	36.7377	37.2241	36.8606	36.8967	37.3428	37.4885	37.7464	37.9499	36.9836	38.2834	36.8893	37.8509	37.8597	38.373	37.6929	38.0526	37.6641	38.5757	40.163	42.1498	43.8756	45.387	46.0217	48.1918	51.5693	53.4339	55.4804	58.6063	61.5291	64.0965	67.1511	69.9405	72.5833	77.1614	80.0295	82.2394	86.135	90.382	94.6985	97.0652
	29.7635	28.3994	29.2841	28.3756	28.8621	28.5955	28.9349	29.0027	29.0278	28.3637	28.6539	28.1638	28.6506	29.3077	29.0174	29.6092	29.6388	28.9385	29.2422	28.8596	28.8628	29.3702	29.8078	28.9453	29.1018	30.0607	30.6141	32.0928	33.9976	35.4944	37.5916	38.2319	40.9663	43.8151	46.5432	48.572	51.8962	54.3798	57.362	60.2905	63.1376	66.6556	71.4181	75.3027	76.9375	81.7129	86.5796	91.4708	94.2045
	33.9141	32.7184	33.2212	32.9409	33.3893	32.8598	33.1411	33.3992	33.0208	32.4481	33.3629	32.5081	32.9257	33.1985	33.5023	34.2177	33.8907	33.4767	33.3884	33.09	32.5219	33.7002	34.0228	32.8852	33.139	33.7206	34.3249	35.248	37.3848	38.8126	40.2602	40.5187	41.8171	44.776	45.6427	48.1439	50.8527	53.5669	56.1301	58.4283	61.665	63.9849	68.0858	70.4941	72.2726	75.7115	80.3846	84.672	86.8881
	39.7797	39.4122	40.0709	39.2634	40.0741	39.9192	40.3449	40.3154	39.6211	39.1012	39.9021	39.2443	39.0814	40.1129	40.2731	40.2986	41.0776	38.8678	40.6524	39.3289	40.1792	40.6345	41.3045	40.503	40.6093	40.6471	40.9134	42.314	44.784	46.325	48.3419	49.7296	51.3908	54.9122	57.2846	58.7483	62.9458	65.4348	68.2452	72.468	76.377	79.1666	84.591	88.1335	91.0584	96.0067	102.004	106.475	110.017
	20.4277	18.8228	19.8524	19.3573	20.2689	19.3534	19.478	19.9813	19.7546	18.722	19.2003	19.7062	19.1614	20.1671	19.8095	19.6978	19.5892	19.315	20.1176	18.7775	19.7669	19.8615	19.9605	19.572	19.8327	19.8951	20.5609	20.8701	22.7683	23.7465	25.0033	25.3974	26.8114	29.019	30.2002	31.341	34.3301	35.2821	36.766	38.8506	41.0472	42.8985	46.2188	48.1279	50.6062	52.4865	56.1297	59.4439	61.5515
	44.3846	43.9879	45.1475	44.0639	44.5778	43.7994	45.0037	44.8706	44.1131	43.7789	43.5339	43.5538	43.7635	44.79	45.41	45.0341	44.3901	44.0978	45.1892	43.8517	44.3332	44.8782	45.1858	44.6787	45.234	44.1136	44.7124	44.9137	46.3335	47.1452	48.3266	47.3628	48.3415	50.7372	50.833	50.8961	52.4836	53.8469	54.6425	55.7858	56.5728	57.3766	58.7362	61.1219	60.5903	62.1412	64.1054	65.6738	66.3873
	30.653	30.2287	30.6376	30.5883	31.648	31.1362	31.2088	31.2205	30.8089	30.7943	30.8665	30.5817	30.8077	30.6868	31.274	31.4781	31.6887	31.186	31.5561	31.1707	31.6996	32.0153	32.6544	31.7518	32.1781	31.0262	32.485	33.0433	35.0918	35.9737	37.5017	37.194	38.8168	40.923	42.5681	43.7874	46.2453	48.4385	50.5738	52.705	54.4558	57.1059	60.1717	63.7511	64.9249	68.1931	71.6695	75.3334	77.7137
	29.0572	28.527	29.1849	28.0502	28.8114	28.3557	28.4378	28.5274	28.5167	27.519	28.2165	27.8401	28.1815	28.2871	28.4021	28.9935	29.4772	28.2412	28.6618	28.193	28.4201	28.8138	29.2562	28.0899	28.6719	29.2196	29.918	30.1152	32.3479	33.1976	34.8734	34.842	36.1833	37.9254	39.19	40.1149	41.654	43.1319	44.212	45.828	47.3765	47.9767	50.98	52.1595	52.5785	54.1021	57.3599	59.9577	61.3284
	30.2974	29.214	29.9256	29.4261	30.2854	29.4834	29.7103	29.9483	29.1674	29.0288	29.8225	29.0854	29.0156	29.5711	29.5178	30.0617	30.1788	29.3327	30.1284	29.2646	30.0725	29.8926	29.8302	29.7894	30.3646	30.5441	30.625	31.7446	33.1281	34.3068	35.3932	35.7102	36.5085	38.6474	40.1102	40.1663	42.5107	44.2446	46.1143	48.5717	50.0849	51.2652	53.7736	55.3462	56.9282	59.0375	62.1815	64.166	65.228
	27.567	26.774	26.638	27.0346	27.7219	26.9357	26.5924	27.5986	26.1639	25.9335	26.4407	25.7023	26.5965	26.3411	26.6885	27.081	27.4299	26.0097	26.9622	26.1586	26.7877	26.6345	27.0118	26.2112	26.5993	27.4351	28.2531	28.9596	31.18	32.7093	34.1735	34.7958	36.414	38.1435	39.2386	40.3374	43.305	45.108	45.9714	47.2867	49.7366	50.9582	52.1966	54.0484	54.7276	55.6635	58.743	60.6463	60.9047
Time (s)	0	2	4	6	8	10	12	14	16	18	20	22	24	26	28	30	32	34	36	38	40	42	44	46	48	50	52	54	56	58	60	62	64	66	68	70	72	74	76	78	80	82	84	86	88	90	92	94	96
[truncated: 258 more columns]

## Sheet: Panel D
HEK WT	22.6621	22.4966	23.1267	23.093	22.6547	22.4884	23.2853	22.8054	23.1885	23.6265	23.244	23.325	24.2783	24.5268	24.3302	24.4086	25.4996	25.1207	25.7621	25.6855	25.148	25.9506	26.1341	25.9889	26.4946	27.2834	27.7416	28.7886	29.4198	29.7134	31.1544	33.8211	34.7188	35.5772	37.1692	39.6264	40.1593	41.2606	43.7245	45.1262	46.094	47.3927	50.0642	50.8692	51.3384	54.0735	55.1831	55.9583	58.8197
	21.7858	21.4681	21.4663	21.6042	21.4709	21.5535	22.2835	21.2864	21.0906	22.2509	21.9108	22.0264	22.8647	23.0152	22.6795	22.4116	24.0632	23.3502	23.4725	23.6217	23.3138	23.4863	24.2862	24.0221	24.3532	25.4991	25.6505	26.7382	27.5193	27.8168	29.2465	31.815	32.9294	33.871	35.6242	37.7677	38.8137	39.9191	42.2243	44.1085	44.9487	46.2786	49.1256	49.7855	50.4983	53.2872	53.9253	54.9159	57.807
	20.6917	20.5453	20.868	21.1301	20.6682	20.4374	21.4632	20.7524	20.7872	21.4821	21.0569	21.1865	22.299	22.2999	21.9287	21.928	23.2254	22.5584	22.8804	23.0247	22.6699	23.0367	23.5228	23.0492	23.5959	27.0224	26.9513	28.2773	28.8479	29.1156	30.0043	32.4177	33.7163	34.3564	35.8583	38.6315	39.0102	40.2034	42.4246	43.8369	44.5865	46.2098	48.5563	48.6701	50.0321	52.2197	53.2157	53.85	56.3959
	36.3942	36.097	36.0994	36.7412	36.5226	36.4113	36.9414	36.1046	36.2313	36.9178	36.6312	36.2609	37.2516	37.3606	36.9337	37.0924	38.5103	37.9263	38.5113	38.5406	38.0748	38.1968	38.851	38.1833	38.9435	41.3857	42.0169	43.6709	44.6997	45.4319	47.1065	49.9366	51.1337	51.731	53.5323	55.5727	56.2973	57.031	59.0254	60.0875	60.4923	61.9877	64.327	64.1401	64.038	66.5472	66.8968	67.6644	69.3803
	21.3381	20.9331	21.4202	21.9384	21.4007	21.4021	22.1043	22.0503	21.9273	23.1316	23.057	23.4078	24.4612	25.1546	24.4748	24.6	26.1466	25.5801	26.1632	26.6612	25.846	26.569	27.0901	27.0862	27.6791	30.5356	30.7733	32.2252	32.6223	33.0288	34.3819	36.4592	37.0379	38.2813	39.6624	41.7915	42.2864	43.4531	44.979	46.7034	46.9623	48.4771	50.651	51.3171	51.9842	54.2553	54.6749	55.1498	57.442
	24.926	24.8084	25.248	25.2078	25.1251	25.2476	25.9143	25.6351	26.1959	26.9481	26.4801	27.1089	27.9918	27.8619	28.1149	27.8067	29.389	28.8151	29.8856	30.0561	29.6131	30.0123	30.4936	30.4756	31.1665	32.6911	32.6163	33.8448	34.0581	34.221	35.1012	37.7524	38.5993	39.3507	40.3041	41.9765	42.7987	43.5276	45.2679	45.8309	46.1372	46.9087	49.2424	49.6962	49.9104	51.7188	52.4684	52.7325	54.5768
	20.8121	20.6484	21.0847	21.1119	20.8814	20.4252	21.4059	21.0917	21.2492	22.0659	21.7636	21.924	23.0867	23.2419	23.338	23.1466	24.645	24.1227	24.6151	24.8439	24.1603	25.0296	25.5935	24.893	25.5296	26.5616	26.7027	27.8345	28.4544	28.8606	29.6593	32.1355	32.961	33.5641	35.0531	36.7263	37.5927	38.2276	39.8978	41.0062	40.8352	42.3483	44.0495	44.7069	45.1381	46.9862	47.5044	47.7775	49.8773
	19.0296	18.6546	19.1026	19.5513	19.2294	19.0476	19.744	19.5828	19.5009	20.5048	20.0919	20.1439	21.4132	21.6726	21.2045	21.6434	22.7909	22.6173	23.1384	23.2545	22.8565	23.104	23.6742	23.4327	23.7063	25.1926	24.9894	25.9361	26.2535	26.2021	27.2194	28.8675	29.7242	30.2668	31.1191	33.2786	33.5909	34.5674	36.1801	37.7469	38.2855	39.2728	41.4728	41.9282	42.2582	44.395	45.2696	45.6436	48.2371
	21.1332	20.9962	21.103	21.3806	20.9251	20.7613	21.4775	20.9477	21.1861	21.6567	21.4683	21.6102	22.7514	22.9423	22.4405	22.5711	23.8601	23.2507	23.7339	23.9226	23.3782	24.0521	24.1774	24.0368	24.544	25.7109	25.8012	27.0168	27.3174	27.3733	28.5518	30.7317	31.4516	32.4594	33.6607	35.9152	36.5076	37.0275	39.4718	40.7509	41.2303	42.5783	44.579	45.3166	45.7137	47.7513	48.6734	49.2366	51.4458
	24.0127	23.9122	23.9742	24.7043	23.9497	23.9357	24.7809	24.5119	24.2008	25.3013	25.3313	25.5522	26.6404	27.1951	26.8397	26.9616	27.8976	27.9362	28.6181	28.4472	27.7499	28.7763	28.9622	28.6867	29.4308	30.8686	30.872	32.0054	32.5319	32.9221	34.0332	35.9422	37.197	37.9191	39.0513	41.567	41.9261	42.8604	44.8524	45.7709	46.7501	48.0662	50.1583	51.5344	51.2106	53.461	54.8105	55.0707	57.5827
	18.6783	18.253	18.707	19.0183	18.5554	18.5876	19.0487	18.5772	18.4421	19.4276	18.961	18.9787	19.9549	20.3736	19.8512	20.1062	21.2036	20.4614	21.1255	20.914	20.5647	21.1357	21.5081	20.9506	21.5335	22.4488	22.3646	23.6699	23.6455	23.988	25.0839	27.4848	28.2452	29.2775	30.6349	32.7733	33.4776	34.2617	36.6155	38.1462	38.848	40.1463	42.8138	43.3286	44.0498	46.5363	47.759	48.3731	50.8642
	16.3122	16.4664	16.2942	16.7215	16.6554	16.6365	17.3875	16.6015	16.7918	17.3559	17.3651	17.2006	18.3529	18.0755	17.9493	17.9189	19.3789	18.6105	19.256	19.1386	18.4506	18.9752	19.5976	19.3679	19.5411	19.9212	19.8767	20.8677	21.3944	21.6393	22.7516	24.5732	24.8283	25.2061	26.8156	28.4041	28.8702	29.3869	30.8784	31.8315	32.0819	32.9743	34.8615	34.6881	35.3214	36.9882	37.6939	38.1053	39.5857
	22.1127	21.966	22.2669	22.2258	21.6943	22.2158	22.6336	21.9378	22.2073	23.1262	22.3878	22.8915	23.7128	24.024	23.2318	23.3822	24.8654	24.1339	24.9593	24.6386	24.6803	24.8597	25.2244	25.2511	25.7013	26.5838	26.3934	27.1509	27.4586	26.9699	28.3246	29.8749	30.8777	31.0318	32.5687	34.7981	35.2921	35.7272	37.8219	39.2777	39.5247	41.0579	43.289	43.9852	44.7758	46.4647	47.5059	48.1172	50.3864
	21.7884	21.3651	21.5203	22.0575	21.774	21.7457	22.1411	21.745	21.3708	22.4668	22.0322	22.0303	23.0393	23.0735	22.7511	22.3776	24.0665	23.2284	24.1152	24.0651	23.6889	23.8337	24.4516	23.9604	24.4358	24.6813	24.665	25.6118	25.8676	25.7554	26.9173	28.5837	28.9794	29.6112	30.8896	33.0073	33.1609	34.1446	35.7538	37.0911	37.8034	38.6906	40.7564	41.2001	41.4986	43.9106	43.8503	44.6221	46.9051
	18.4941	18.2099	18.4234	18.611	18.7106	18.5154	19.4936	18.8614	18.8264	19.7389	19.5187	19.7417	20.8299	20.8152	20.5726	20.7957	21.9806	21.553	22.4026	22.1672	21.6975	22.3303	22.6764	22.4678	22.8897	24.1871	24.2597	24.844	25.2995	24.5934	25.3645	27.4928	27.7444	28.0613	29.2909	31.0122	31.3917	31.994	33.4076	34.587	34.6888	35.5401	37.8032	38.124	38.5226	40.0863	40.3417	41.0822	43.1505
	22.9676	22.5733	23.4278	23.4924	23.3084	22.7883	23.718	23.6562	23.8834	24.8342	24.3152	24.4055	25.2269	25.3121	25.0687	25.5369	26.5674	26.0775	26.9373	27.0833	26.655	26.4874	27.741	27.1828	27.9981	28.8574	28.7507	29.9837	31.0122	31.0162	32.0314	34.4116	35.461	36.169	37.5661	39.7828	40.0032	41.0814	42.6913	44.142	44.5509	46.1271	48.1127	48.4079	49.3078	51.4451	52.5823	52.7266	55.2317
	21.9005	21.3729	22.0826	22.3324	22.0145	21.897	22.7416	22.1915	22.8185	23.1253	23.0469	22.9138	24.3004	24.5074	24.334	24.2123	25.8826	25.0624	25.5995	25.6202	25.3821	26.1186	26.9207	26.5617	26.7322	27.5491	27.4182	28.3786	28.4304	28.4597	29.883	31.7345	32.5551	33.586	35.1768	37.1592	38.1099	39.1549	41.6056	42.9569	43.6101	45.2361	47.2768	48.6	48.4529	51.2814	52.3217	52.8608	55.7003
	24.9554	24.7553	25.2191	25.5916	25.3126	24.974	26.3216	25.5173	25.7535	26.9494	26.3754	26.7911	27.8301	28.0529	27.9329	27.723	29.3351	28.8541	29.3975	29.6107	29.1881	29.7884	30.2341	30.177	30.57	31.8041	32.0412	33.3189	34.022	34.2396	35.9307	38.4469	39.1723	40.7013	42.5162	45.1923	46.2182	47.7816	50.0335	51.7164	52.9489	54.4037	57.3507	58.3985	58.8235	61.3489	61.8426	62.9798	65.5683
	23.7173	23.0256	23.7912	24.1739	23.73	23.6041	24.4811	24.2309	24.4125	25.2837	24.9816	24.9924	26.5185	26.4081	26.1952	26.2497	27.717	27.0453	27.8477	27.7745	27.6601	28.0483	28.485	28.0429	28.7342	30.0618	30.0578	31.4407	32.0681	32.7071	34.0626	37.0933	38.3232	39.5792	41.9187	45.2187	46.71	48.4217	51.1961	53.149	54.6392	56.5936	59.8712	61.0007	62.1342	64.4929	65.7551	66.8564	69.9132
	22.3776	21.9901	22.651	22.7287	22.6163	22.1363	23.153	22.6067	23.0388	23.7183	23.2431	23.2733	24.6934	24.6269	24.4285	24.5213	25.7239	25.2334	25.814	25.7489	25.2668	25.9703	26.3101	26.2875	26.5664	30.5836	30.8659	32.2843	32.9482	33.6203	34.801	37.3959	38.7358	39.9615	42.3536	45.3025	46.3209	48.1919	50.9527	52.1557	53.6877	55.8464	58.7218	60.107	61.2699	63.8059	65.1906	66.5984	69.3992
	20.7208	20.7521	20.7599	21.4204	21.0387	21.0362	21.8618	21.4272	21.5436	22.4467	22.2816	22.6931	24.0194	24.1667	24.1111	24.1373	25.735	24.907	25.6588	25.9981	25.2997	26.0153	26.7619	26.5632	27.0627	29.2861	29.7489	30.6873	31.3448	31.3866	32.9435	35.5159	36.522	37.4232	39.0736	41.612	42.7139	43.7686	46.304	47.8079	48.8811	50.9016	52.9706	54.1738	54.9249	58.0774	58.5363	59.7145	62.4084
	22.5925	22.3692	22.8364	22.8889	22.8157	22.7794	23.4882	23.233	23.2614	24.3472	24.2649	24.4337	25.5768	26.0678	25.3393	25.497	27.0722	26.7512	26.9663	27.1991	26.7187	27.5788	27.5983	27.613	28.0304	34.2407	34.1561	35.7587	35.8238	36.4879	37.5649	39.9406	41.0092	41.9383	43.6719	45.6659	46.5829	47.7794	49.9076	51.3254	51.5044	53.5589	55.4251	56.4667	56.8264	59.0797	59.9716	60.4927	63.1451
	21.3548	20.9605	21.2312	21.5091	21.0519	21.1036	21.9396	21.3751	21.4126	22.2145	21.8364	22.0434	22.7199	22.8471	22.4046	22.5589	23.7098	23.4891	23.8971	23.6398	23.3449	23.7911	24.0692	23.8943	24.3403	26.1747	25.9782	27.4374	28.0415	28.2553	29.4136	31.5113	32.4825	32.7954	34.2023	36.1107	36.4563	37.4516	39.2104	39.858	40.1922	41.3352	42.645	43.3578	43.5126	45.3496	45.9102	46.5111	48.4071
	24.7423	24.8229	24.9847	25.4493	25.2274	25.1667	26.1016	25.361	26.0409	26.7354	26.9082	26.9978	27.7788	28.1753	27.7904	27.5532	29.148	28.744	29.4016	29.5791	29.0913	29.556	30.2368	30.1259	30.8313	31.8798	31.7667	32.8875	33.4075	33.3076	34.3368	36.8211	37.3816	37.7994	39.1285	41.1935	41.6839	42.4994	44.2458	45.3843	46.0437	46.9642	49.0857	49.4814	49.7449	52.2015	52.675	53.3237	55.4325
	19.7717	19.4462	19.819	20.0803	19.8314	19.8655	20.3897	20.2443	19.9955	21.0284	20.3418	20.5888	21.878	21.9347	21.6059	21.6406	22.7234	22.0932	22.5737	22.5771	22.346	22.812	23.0863	22.8433	23.3764	24.0906	24.083	25.0772	25.5148	25.635	26.5741	28.7556	29.2617	29.8345	31.0927	32.8374	33.1636	34.0059	35.736	36.9767	37.1393	38.5964	40.5873	41.2315	41.5343	43.022	44.0052	44.4037	46.4575
	23.485	23.3874	23.6602	23.7477	23.7835	23.7384	24.5588	24.4447	24.6355	25.7091	25.5723	25.7736	27.0883	27.3789	27.2282	27.3186	28.8103	28.3762	28.9246	28.891	28.6211	29.3429	29.7033	29.5868	30.0974	31.4701	31.3753	33.2068	33.8849	34.2785	35.8694	38.7425	39.7247	40.6596	42.12	44.8417	45.3627	46.7741	48.8928	50.3123	50.9086	52.8932	54.8205	55.8249	56.4474	58.8286	59.4045	60.4927	62.9449
	29.0872	28.5723	29.0488	29.4252	29.1392	29.2549	29.7591	29.4221	29.3788	30.6217	29.9933	29.9935	31.1443	31.2984	31.2897	31.2326	32.7284	32.3078	32.9174	33.0073	32.3273	32.9533	33.3896	33.3855	33.7279	36.138	36.1342	37.6403	38.2659	38.6804	39.8627	42.1608	43.2613	44.4385	45.9785	48.1872	48.9622	50.2516	52.2911	53.4323	54.4283	55.6129	58.1284	58.7152	59.1151	61.4795	62.606	63.1822	65.6223
	33.5761	33.2407	33.6298	34.3991	34.0544	33.6573	34.4518	34.2647	34.6126	35.6799	35.135	35.922	36.9067	37.4958	36.783	36.953	38.9957	38.4316	39.0377	39.5185	39.0799	39.3605	40.4252	39.4672	40.3668	36.9278	36.6661	38.422	38.8998	39.093	40.6134	43.1516	44.3753	45.6602	47.0096	49.4235	50.5862	52.1829	53.9002	55.8404	56.4801	58.098	60.4959	61.8504	62.1513	64.7499	66.0794	66.9438	69.6946
	26.8107	26.7385	27.1526	27.2812	26.9812	27.0746	27.8656	27.7424	27.8203	28.8753	28.6255	28.87	29.9763	30.3768	30.2168	30.2813	31.698	31.2599	31.7796	32.0579	31.4339	32.1039	32.6362	32.2774	33.1082	32.2184	32.1547	33.6405	34.2722	34.5347	35.846	38.7624	39.8167	40.6391	42.6822	45.1261	46.0324	47.7466	49.9936	51.6234	52.812	54.0967	56.7788	57.7873	58.6195	61.4044	62.2708	63.0014	65.5909
	32.1967	32.0226	32.1399	32.6212	32.1677	32.0256	32.6317	32.1714	32.0778	32.8704	32.6946	32.6479	33.2765	33.4891	33.1066	32.9817	34.4505	33.9229	34.3236	34.6302	33.7962	34.1461	34.5033	34.0663	34.8084	28.074	27.8363	29.0451	29.6022	30.0682	30.9977	33.2649	34.2588	35.3814	36.6653	39.5294	40.3109	41.7408	44.4376	46.4422	47.2345	49.2104	52.2721	53.4082	54.2548	56.9557	58.5409	59.3803	62.2882
	24.578	24.3932	24.7221	24.7689	24.9005	24.8047	25.3864	25.3214	25.1256	25.8767	25.3712	25.5782	26.9762	26.9861	26.6383	26.8258	28.2321	27.6613	28.3169	28.4126	28.1845	28.7725	28.946	28.5974	29.3372	29.5719	29.3537	30.7756	31.4424	32.1622	33.227	35.9353	36.8493	37.5355	39.3223	41.3064	42.1696	43.2361	45.4939	47.3078	47.7511	49.1439	51.6593	52.7811	53.2886	55.8576	56.7677	57.443	59.5123
	25.3875	25.2398	25.1704	25.4744	25.3421	25.3902	25.7968	25.4012	25.4158	26.115	25.7961	25.7897	26.9161	26.9043	26.5211	26.3853	28.0108	27.3313	27.9356	27.7378	27.5527	27.7951	28.4341	27.9859	28.4823	27.7696	27.7052	28.9719	29.6877	29.9757	31.2941	34.0596	34.9273	35.8222	37.2975	39.7344	40.5068	41.4531	43.585	45.3448	46.0258	47.8205	50.2327	50.8366	51.6077	54.3486	55.2678	55.5903	58.3466
	35.6396	35.1795	35.7204	36.0372	35.7273	35.562	36.3424	35.7749	35.8898	36.7934	36.5211	36.5337	37.8991	37.6801	37.5883	37.7695	39.3942	38.8724	39.3519	39.4684	38.8955	39.7589	40.1509	39.7575	40.4251	37.0315	36.947	38.3073	38.8618	39.0703	40.0599	42.7987	43.6338	44.435	46.2109	48.7895	49.6245	51.0659	53.5409	54.8793	56.1191	57.769	60.759	61.9445	62.5917	65.831	66.9894	67.9011	70.69
	33.6488	33.1503	33.747	33.9399	33.8324	33.913	34.7109	34.5601	34.4291	35.3627	35.1589	35.5482	37.0557	37.0054	37.1455	37.1788	38.8871	38.5993	38.9843	39.4088	38.8594	39.9611	40.0857	39.7829	40.3652	38.6745	38.5933	39.7669	39.8949	39.915	40.888	43.3245	43.765	44.6041	46.2182	48.4458	49.1149	50.4407	53.179	54.5676	55.7247	57.2626	60.2279	61.4155	62.0735	64.9081	66.1608	67.3988	70.6858
	25.7509	25.3569	25.754	25.9503	25.755	25.6744	26.5165	26.3326	25.9972	26.9723	26.8924	27.3048	28.6035	28.6382	28.6681	28.6159	30.2759	29.8101	30.4115	30.533	29.8265	30.5097	31.1596	30.8426	31.0432	30.6427	30.5065	31.5511	32.0895	31.9852	33.1822	35.3607	36.4154	37.4695	38.7874	41.3189	42.3738	44.1134	46.6933	48.643	50.0768	52.0485	55.1017	57.0977	58.5654	61.7396	63.1838	64.7518	68.2269
	21.2544	21.0335	21.1947	21.6436	21.4126	21.218	21.9903	21.5265	21.6775	22.4704	22.0707	22.2187	23.4688	23.6216	23.1142	23.3419	24.6846	24.0078	24.4663	24.5845	24.0207	24.6242	24.8379	24.7665	25.0837	25.9889	25.8169	26.8536	27.4571	27.804	28.6959	31.0583	31.9206	32.8514	34.476	36.7558	37.7539	39.2333	41.6025	43.7286	44.875	47.2038	50.1436	51.7089	52.7437	55.9653	57.4885	58.8817	61.9707
	25.1415	25.1183	25.3008	25.8935	25.5125	25.5668	26.267	25.8493	25.7159	26.9826	26.8513	27.0248	28.1825	28.2468	28.1294	28.2316	29.7604	29.3232	29.7855	30.4444	29.8016	30.1355	30.8375	30.4758	31.1592	32.5994	32.6803	34.024	34.4351	34.5559	35.6159	38.0445	38.9888	39.6485	41.13	43.3973	44.1243	45.3895	47.7639	49.1659	50.26	52.3645	54.7268	55.8707	57.0103	59.95	60.9203	62.1571	65.0557
	24.7174	24.741	24.8132	25.2672	24.8877	25.1338	25.6829	25.2887	25.3983	26.208	25.9691	26.1497	27.1633	27.5888	27.2215	27.3785	28.6391	28.2497	29.0157	28.7498	28.5013	28.9403	29.322	29.2914	29.6951	29.7122	29.8443	30.6124	31.1284	31.2822	32.203	34.5238	34.9599	35.7241	37.3821	39.5818	40.2311	41.3594	43.6953	45.3471	46.2553	48.3895	50.523	52.138	52.9738	55.2974	57.0394	57.9616	60.7824
	21.453	20.1506	20.2731	20.7336	20.888	20.6885	20.3665	19.9091	19.5122	20.6297	20.4113	19.6731	20.1708	19.3973	19.4932	20.1749	19.6386	19.4286	20.5877	19.7375	19.998	20.2385	19.6707	19.3467	20.6043	19.9462	20.3342	21.389	21.6371	22.4357	24.1094	26.302	28.1799	29.2156	30.8154	32.998	33.974	36.0198	38.8644	40.414	42.6734	44.8349	47.1245	47.5051	48.4684	51.2495	53.5379	54.0633	55.4652
	19.2815	18.3797	18.5509	19.0508	19.1645	18.7741	18.9065	18.6396	18.4401	18.8715	18.8871	18.2632	18.8276	18.4636	18.0831	19.1472	18.2471	17.9719	19.1722	18.344	18.1001	18.0455	17.8593	17.7155	18.3136	18.4209	18.1751	18.9904	18.7371	19.1458	19.7669	21.3999	22.856	22.9001	23.1915	24.7192	24.8361	26.1537	28.1242	28.4507	29.6922	31.3039	32.4147	32.6172	33.1159	34.5355	36.3297	36.5734	37.0608
	26.0547	24.8779	25.0681	25.7785	26.2061	26.096	25.8223	25.8515	25.56	26.0979	26.1582	25.5452	25.9534	25.7818	25.3105	26.4883	25.7884	25.0965	26.7861	25.9511	25.3314	25.9183	25.6282	25.4294	26.2571	25.8863	25.7204	27.1305	26.8452	27.4763	28.3715	30.4612	32.4252	33.0167	33.7687	35.4552	36.3415	38.2151	40.7728	42.1128	43.9698	46.424	47.8665	48.7547	49.9438	52.448	54.7889	55.65	57.0076
	46.3538	45.0839	45.8135	46.6316	47.1176	46.6919	46.7648	46.4171	46.2163	47.1889	47.2284	46.2719	47.3281	46.5706	46.2894	47.5462	46.464	45.9103	47.625	46.5453	46.0021	46.4431	45.9122	45.5115	46.3011	46.6302	46.8852	48.7366	49.303	50.873	52.8816	56.0031	58.9882	60.6824	62.2856	65.8621	66.9565	69.546	73.6663	75.0736	77.6767	80.8556	83.2446	83.9122	85.4012	88.5965	91.1417	92.1024	93.2217
	39.1262	37.7449	38.1391	38.6042	39.0969	38.5225	38.3735	38.0409	37.6124	38.288	38.2354	37.3472	38.2531	37.497	37.0286	38.2589	37.5531	36.9691	38.6252	37.692	36.7965	37.5513	37.1704	36.6605	37.5364	37.3265	37.4788	39.2627	39.6458	41.1756	43.4851	46.4259	49.029	50.6951	52.4393	54.8856	56.5754	59.1266	62.3175	64.5188	66.9015	69.2544	71.4313	71.9287	72.87	75.6558	78.2283	78.5107	79.7965
	29.7799	28.8928	28.9707	29.5116	29.6246	29.3877	28.9282	28.7628	28.5256	29.1317	28.9733	28.1217	29.2678	28.5934	28.4218	29.3582	28.6136	27.6817	29.1531	28.5629	28.3323	28.4126	27.9419	28.2225	28.7897	28.217	27.9381	29.3619	29.2358	29.4057	30.8612	32.1803	33.713	34.2132	35.0184	36.4177	36.8693	38.5708	41.1122	42.2096	43.6277	46.2419	47.5849	48.4627	49.4081	51.851	54.1457	55.0437	56.5175
	29.5489	28.2464	28.7332	29.3057	29.7136	29.3047	28.9886	28.786	28.4959	29.4288	29.2203	28.6452	29.436	28.959	28.7863	29.6803	28.7166	28.3758	29.702	29.2556	28.9114	29.126	28.9196	28.569	29.4793	29.5314	29.4908	30.8048	30.8455	31.5432	32.722	34.9118	36.6546	37.3592	38.2308	40.2589	41.0025	42.6354	45.2382	46.0756	48.0654	50.4257	51.5185	51.9451	52.9459	55.2537	56.7412	57.488	57.9351
	36.2439	34.9939	35.4795	35.9869	36.5057	35.9941	35.785	35.5131	35.2449	36.0259	35.9951	35.2792	35.9396	35.1859	35.5648	36.2029	35.3502	34.8261	36.3481	35.5109	34.8243	35.2807	34.8535	34.9041	35.254	35.3862	35.3265	37.341	37.989	39.1984	41.409	44.1296	47.4141	48.9113	50.5778	53.672	54.9673	58.0484	61.2653	63.3195	66.0707	68.9449	71.232	72.3955	74.5758	77.2815	80.1232	81.0352	82.2025
	26.1748	25.1117	25.6147	25.9629	26.1702	25.556	25.5228	25.6293	25.1475	25.7974	26.0238	25.4632	25.9958	25.1974	25.3679	26.422	25.5147	24.908	26.4729	25.7288	25.4489	25.9742	25.4778	25.7755	25.8889	26.7655	26.9972	29.0449	29.4506	30.4349	32.4767	34.8467	36.4671	38.4398	39.174	41.7459	42.1906	44.3329	46.8906	48.1357	49.5304	51.7509	53.4675	53.9081	54.905	57.6312	59.4082	59.9947	60.7044
	35.3603	34.3179	34.6269	35.2708	35.5756	35.3675	35.3421	34.8396	34.9827	35.3053	35.2908	34.7154	35.407	34.8707	35.0108	35.7376	35.1604	34.6358	36.0633	35.2346	34.7962	35.21	34.8016	34.843	35.9793	35.8746	36.1885	37.6937	38.485	39.6498	41.4849	43.5936	46.6853	47.8515	48.8768	51.5649	52.6255	54.8479	57.5961	58.8628	61.4128	63.6902	65.7725	66.0275	67.5913	70.0856	72.3393	73.2593	74.2968
	52.0756	50.5308	50.9502	52.0115	52.4626	51.9313	51.5696	51.6876	51.4361	53.6382	53.4018	52.5417	53.8902	53.1195	53.0181	53.9073	53.2131	51.9353	54.3895	53.3639	52.6132	52.6884	52.6757	51.6961	52.2946	52.9093	52.8486	54.6734	55.5651	57.347	59.2038	62.4872	65.9435	69.2912	71.822	75.0917	77.5351	80.7088	85.0503	86.5098	89.1576	92.5278	95.2461	95.0271	96.532	99.3995	102.042	101.537	101.9
	44.5922	43.3833	44.2312	45.155	45.2019	45.0191	44.823	44.577	44.3412	45.2334	44.995	44.4248	45.3201	44.7342	44.3659	45.518	44.8902	44.2154	46.0436	45.1246	44.3615	44.8192	44.6173	44.0698	45.3344	45.1011	45.8053	47.6749	48.3136	49.9058	51.9823	55.419	58.7468	60.6008	63.1777	66.6357	68.5566	71.2294	75.265	76.9764	79.458	82.2229	84.0506	84.3734	85.4858	87.5681	89.9192	90.1384	90.6913
	29.1025	27.8547	28.4779	29.0613	29.217	28.8123	28.9003	28.7368	28.1404	28.9572	29.2467	27.9837	28.9276	28.2119	28.0876	29.1039	28.3656	27.8352	29.3982	28.5726	28.1862	28.6426	28.1742	28.0237	28.7116	28.4826	28.9742	30.4798	31.1828	32.1983	34.7443	37.5114	40.4702	41.6602	43.5224	46.3609	47.3457	50.0255	53.1282	55.0717	57.1405	60.0307	62.5836	63.2427	64.0836	67.1343	69.1882	70.4571	71.09
	42.3625	41.0356	41.0501	41.8052	41.8274	41.1205	41.1026	41.0594	40.5633	41.1318	41.2829	40.2635	41.2688	40.5036	40.3071	41.2785	40.3003	39.756	41.3563	40.4507	40.2084	40.4125	40.2779	40.1195	40.7804	40.669	41.3991	43.3025	44.1693	45.9315	48.8493	52.009	56.0104	57.9328	59.8849	63.6289	65.8477	69.3885	73.7684	77.1768	81.2675	85.3154	88.1905	89.6786	91.0445	94.3951	97.1978	98.5185	99.97
	37.1869	36.057	36.3425	36.9102	37.1338	37.1531	36.6164	36.3538	36.2352	36.8922	37.0482	35.7715	36.7193	36.1944	36.0768	37.2434	36.5511	36.1011	37.3821	36.4642	35.7588	36.3153	35.908	35.5938	36.0966	36.2533	36.5402	37.8678	37.6994	38.6572	40.0454	42.606	44.9048	45.5833	46.5827	48.9322	49.9992	52.1383	55.4942	57.8691	60.1016	62.8756	65.2794	66.1199	67.9538	71.1517	74.233	75.4656	76.9529
	16.0076	14.8605	15.0925	15.4393	15.6014	15.1833	15.2588	14.762	14.4209	15.1509	15.092	14.3831	14.7741	14.5293	14.4365	15.1758	14.4777	14.079	15.147	14.7735	13.9308	14.5399	14.1756	14.2108	14.6718	14.6489	14.9198	15.844	15.8178	16.5023	17.4625	19.0488	20.502	21.1463	21.7138	23.3602	23.4569	24.8483	26.7267	27.5411	28.7751	30.5006	31.409	31.6164	31.857	33.709	35.3502	35.8231	36.0678
	31.1534	29.8919	29.8888	30.2037	30.7762	30.2862	30.0106	30.1545	29.4347	30.6069	31.0456	29.9384	30.8124	30.082	30.2828	31.4083	30.4841	29.951	31.5584	30.2674	29.9258	30.1775	29.6547	29.4674	29.9738	29.8638	30.1434	31.4284	32.0115	32.9119	34.7563	37.2192	39.884	40.785	42.322	44.4586	45.5604	47.8284	50.9866	52.661	54.6671	57.6792	59.9914	60.7637	62.2335	65.162	67.5257	68.1968	70.251
	31.4909	30.1509	30.5863	31.5196	31.7405	31.3912	31.234	31.2975	30.8255	31.5835	31.6157	30.6175	31.5431	30.7778	30.9074	32.2242	31.3133	30.9427	32.5712	31.9371	31.1328	31.6011	31.0919	30.802	31.5258	31.8001	31.8222	33.0587	33.5167	34.3771	36.2711	38.7053	40.9104	41.7686	43.1895	46.1457	47.5582	50.5063	53.9308	55.4606	57.9726	61.7721	63.6281	65.1424	66.6456	69.6767	72.5847	73.3648	75.3681
	27.8372	26.4254	26.4858	27.0817	27.1875	26.6546	26.5211	26.566	26.4315	27.0764	26.6476	26.1063	26.9361	26.4	25.9414	27.1411	26.1106	25.5611	26.7505	26.4092	25.9081	26.1316	25.4946	25.2569	26.1053	25.3109	25.6388	26.6455	26.8019	27.2116	28.7908	30.7097	32.8708	33.7128	34.5453	37.0821	37.7203	40.0013	43.1386	44.5387	46.0652	49.1347	51.4425	52.058	53.6364	56.7688	59.3004	60.6044	62.2213
	28.8691	27.6717	28.5425	29.0159	29.4038	29.0333	29.025	28.9466	28.697	29.5242	29.8764	29.4191	29.8263	28.9614	29.0907	30.0719	29.5692	29.4534	30.8662	29.8277	29.1595	29.3965	29.3743	29.0778	29.6952	29.5927	30.158	31.2917	31.4904	32.621	33.9627	35.5273	38.0648	38.4187	39.5291	42.7182	43.3012	45.0885	48.8884	50.3888	52.6617	55.7162	57.6872	58.5303	60.1349	63.2785	65.7035	66.8237	67.6102
	28.6381	27.4609	28.0963	28.8053	28.9083	28.4777	28.2083	28.1376	27.9928	28.6464	28.4979	27.7367	28.5852	27.7704	27.9165	28.9164	28.1027	27.7919	29.3076	27.988	28.0535	28.6019	28.0617	27.6582	28.5741	28.4412	29.0942	29.9512	30.7874	31.5146	33.3487	35.6324	37.7541	38.8878	40.1954	42.7174	43.8874	45.9957	49.0544	50.9312	53.3205	55.78	57.8302	58.4653	60.1377	62.4652	64.9883	65.9203	67.1223
	30.8566	29.0941	29.676	30.3074	30.0573	30.0187	29.3317	29.3483	29.2159	30.1948	29.4851	29.0767	29.9173	29.2277	29.2076	30.0627	29.5509	29.0514	30.3976	29.9106	29.3123	29.587	29.2426	28.8244	29.4939	29.4421	29.8847	32.0351	32.8462	34.3774	36.6539	39.5129	42.5398	43.79	45.65	48.381	49.6866	52.4901	55.6818	57.3534	60.2679	62.785	65.2597	66.2368	67.4445	70.4096	73.1046	74.0007	75.5833
	26.9974	25.874	25.8007	26.3014	26.7749	26.2731	25.8723	25.2285	25.4176	25.9907	26.098	25.3321	25.9795	25.2217	24.9842	26.2607	25.7438	24.9939	26.4051	25.9047	25.6675	25.566	25.5043	25.3412	25.8767	25.1844	24.9093	26.3411	26.1348	26.526	27.8392	29.2233	31.1585	31.4549	31.8921	33.7472	34.0074	35.5905	38.0557	39.3544	41.0417	43.3682	45.1533	45.4914	47.3938	49.3988	51.9706	52.4591	53.7669
	24.9372	23.8671	24.1346	24.6989	24.9278	24.3587	24.2815	24.1662	24.1717	24.6254	24.5427	23.7838	24.6895	24.1049	23.9466	24.6143	24.0129	23.4075	24.7646	24.0038	23.4494	24.0023	23.6817	23.5372	24.3044	24.4069	24.7691	26.2953	26.5792	27.7357	29.8303	32.4887	34.9944	36.3417	37.5217	40.3696	41.476	43.6641	46.2064	47.9622	49.6962	52.2871	54.3251	54.8519	55.913	58.5115	60.6748	61.248	62.6135
	37.846	37.2097	37.6011	38.1248	38.5529	38.2969	38.1282	37.9259	37.6682	38.8581	38.6171	37.6624	38.2382	37.6912	37.7923	38.9064	37.8966	37.7772	39.1918	38.0786	37.8855	38.0934	37.7872	37.7993	38.9972	38.8715	39.336	41.5975	42.2595	44.1979	46.8274	50.7049	54.1851	56.6583	59.0431	62.5747	64.3674	67.9104	71.3569	73.3399	76.2302	79.1312	80.9669	81.3507	82.8486	85.0602	87.4813	87.4406	87.8353
	32.1136	30.9602	31.6478	32.2083	32.2484	31.8728	32.267	31.6818	31.5614	32.0855	32.071	31.6522	32.5581	31.5399	31.1964	32.4739	31.8114	30.8103	32.2472	31.8045	31.4564	31.3999	31.0524	31.1765	31.8496	31.3223	31.6399	33.4014	34.0311	35.1307	37.2056	39.6898	42.156	43.4192	45.2809	47.7385	49.1234	51.1777	54.6256	56.1546	58.6329	61.313	63.5677	64.0825	65.6521	68.6754	71.0669	72.3659	73.3704
	34.2792	32.6724	33.5272	33.5556	33.9092	33.1356	32.9487	32.7292	32.4967	33.097	33.0344	32.29	33.0661	32.2746	32.2192	33.4906	32.4779	31.8438	33.4304	32.4552	31.9456	32.4409	31.9132	31.8565	32.871	32.1851	32.2617	33.9259	34.5055	35.8044	38.0832	41.4774	44.205	45.8698	48.0639	50.5216	52.1323	55.2371	58.3922	60.3631	62.5335	65.5354	67.6823	68.7257	69.627	72.5689	74.2453	75.1434	75.8766
	108.524	105.214	105.729	105.53	105.966	104.889	104.084	103.404	102.836	103.371	102.69	101.208	102.158	100.441	100.156	101.002	99.2976	98.5974	100.708	98.6172	97.1794	97.5713	96.6709	95.9995	97.2134	97.2475	101.294	106.465	109.21	112.951	117.93	123.822	127.657	130.548	131.544	135.514	135.161	137.554	141.407	142.436	144.193	147.029	149.342	148.345	148.324	150.432	151.832	150.9	150.428
	24.9248	23.5802	23.8594	24.5479	24.9855	24.3019	24.2485	24.2654	23.8135	24.5532	24.5811	23.6385	24.3563	23.8672	23.6482	24.8154	24.0482	23.3208	24.9112	24.1329	23.46	23.9769	23.6429	23.4625	23.9974	23.6538	23.9319	25.3461	25.631	26.4136	28.1245	30.7026	32.9241	34.2886	35.5617	38.1215	38.9785	41.1509	44.4233	46.3041	48.1406	51.0264	53.1898	54.0787	54.9903	57.5821	59.8485	60.6499	62.1576
	36.9542	35.4174	35.7188	35.9907	36.4126	35.6493	35.2401	34.9368	34.5178	35.4903	35.468	34.2465	34.8797	34.2375	34.2267	35.4166	34.6094	33.9172	35.2278	34.3262	33.8343	34.0522	33.7375	33.5886	34.5337	34.8962	35.5078	37.6574	38.1122	39.1958	41.4013	44.4968	47.3631	48.6026	49.7484	52.3742	53.4499	55.2155	58.3164	59.5892	61.6924	63.6614	65.9861	66.327	67.0748	69.8197	71.6972	72.357	73.07
	27.3506	25.9314	26.4063	26.9456	27.1412	26.6853	26.2211	26.1664	25.6809	26.4235	26.5546	25.5404	26.4493	25.7252	25.661	26.4821	25.9608	25.1524	26.4681	26.1478	25.6588	26.1517	25.7942	25.3461	26.0089	25.8939	26.237	27.7181	27.8549	28.8262	30.2457	32.8871	34.7848	35.8737	37.0853	39.2952	39.8191	41.7762	44.6034	45.8424	47.837	49.7886	51.4323	51.8754	53.0917	55.1042	57.6363	57.9682	59.0308
	37.7447	36.2241	36.941	37.3479	38.0541	37.2526	36.9663	36.9254	36.6972	37.3284	37.2882	36.3178	36.7733	36.7032	36.3643	37.1954	36.4736	35.5742	37.3288	36.2861	35.8577	36.1755	36.0514	35.3327	36.2854	36.2482	36.5689	38.0213	38.1946	39.3075	40.9385	43.527	46.1042	47.6217	48.6895	51.2296	52.5261	54.8983	58.4803	59.7861	61.6752	64.7274	67.0769	67.6498	68.5944	71.5308	73.8499	74.4632	75.2252
	31.3851	29.9418	30.1027	30.4422	30.9822	30.3905	30.1411	29.7859	29.4763	30.2671	30.2132	29.5553	30.2572	29.6527	29.5221	30.3287	29.5793	28.8785	30.5239	29.7942	28.8577	29.5025	29.0959	28.713	29.5142	29.147	29.4839	31.0964	31.2149	32.0663	33.8881	36.3024	38.5916	39.753	40.8275	43.1687	44.1612	46.4604	49.088	50.2709	52.2451	54.3183	56.1765	56.7908	57.9241	60.1205	62.4809	63.0981	63.6941
	37.9347	36.4049	36.6785	37.3902	37.7604	37.3864	36.9887	36.9729	36.8429	37.7077	37.558	36.8156	37.7641	37.0222	37.0124	37.9971	37.2016	36.3781	38.1162	36.7344	36.457	37.1699	36.278	35.9119	36.5235	36.1912	36.3939	37.8053	37.8526	39.1851	40.7206	42.8839	45.2587	46.3183	47.4269	49.6793	50.7202	52.6138	56.2463	58.0176	60.387	63.2503	65.8064	66.4417	67.8035	71.2844	73.853	75.3858	76.7464
	41.0529	39.5964	39.9068	40.6768	40.946	40.6869	40.5167	40.4341	40.1899	40.8692	41.5978	40.5409	41.3762	40.581	40.6431	41.2609	40.4039	39.8836	41.4685	40.3298	39.7703	40.3438	40.1471	39.5355	40.3568	40.0076	39.8266	41.959	42.0244	43.2333	45.1047	47.137	49.5091	50.5404	51.0968	53.437	53.5025	55.1826	57.5584	58.9286	60.7428	62.6583	64.5183	63.8049	65.5215	67.2224	69.554	70.3386	71.7005
	29.0024	27.5025	27.5347	28.0555	28.9461	28.077	27.965	27.77	27.9727	28.4978	28.7488	27.6532	28.8939	28.0675	27.9536	29.1661	28.6889	27.7856	29.6944	28.5156	28.0666	28.594	28.2001	27.8427	28.4064	28.6936	29.1003	30.304	30.0725	31.367	32.4407	34.9669	37.1714	38.3182	39.5469	42.0305	42.7731	45.3441	48.3313	49.6664	51.9805	54.4451	56.1517	57.2491	58.378	61.2575	63.7195	64.4605	65.5739
	21.8132	22.2552	22.6366	21.8934	21.4955	21.2459	21.0358	21.5868	21.0664	20.7768	20.8866	21.2902	21.4911	19.4981	20.0423	20.8072	20.593	20.3172	20.2528	20.3402	20.2032	19.5324	20.0749	19.8647	19.3113	19.6929	20.409	21.4868	22.9873	22.257	25.2921	26.9925	28.4588	29.7256	31.9241	33.2758	34.8252	36.017	35.9823	38.1975	38.7667	39.0918	39.7263	40.5241	41.3132	41.816	42.4646	42.8792	43.5522
	17.5016	17.8491	18.2784	17.6712	17.7152	17.8304	18.0583	18.3688	17.8224	17.3308	17.5571	18.5967	18.4761	17.4541	16.9713	19.0125	18.2881	17.8109	18.2351	17.987	18.4242	17.9352	18.5826	18.3657	17.7027	18.0416	19.0572	20.4086	21.8807	21.6249	25.1849	27.5464	30.1128	31.0403	34.7006	36.5181	37.9223	39.3038	39.449	41.2591	43.769	44.1235	44.8019	45.611	46.8538	48.202	49.0609	49.1102	49.6885
	13.0651	13.6928	13.6889	13.7626	13.0443	12.5823	13.3777	13.9267	13.1663	13.2908	13.3016	13.6576	14.5976	13.3727	13.3591	13.7281	14.3235	13.8832	13.7929	13.7492	13.9349	13.6733	14.2353	14.4349	14.0547	14.0007	15.5051	17.0521	18.4032	18.0603	21.3583	24.3658	26.5592	28.7992	31.2642	33.4868	34.9732	37.2775	37.6227	39.7071	41.7134	41.9516	42.5839	42.264	45.0447	46.0222	46.4597	46.4654	47.7647
	15.4995	16.0669	16.5629	16.0762	16.2522	16.4828	17.1277	17.1862	17.322	17.1202	16.675	17.8927	17.7582	17.3806	16.9408	17.6583	18.1519	17.4986	17.194	18.0741	17.94	17.5402	18.4323	17.7618	17.4307	17.8181	18.7541	20.2435	21.9916	22.3718	25.7603	28.4339	30.3778	32.0517	36.0813	38.7101	40.3261	42.5874	44.346	46.6101	48.9569	50.5548	51.6308	52.4986	54.8277	55.4974	57.0749	58.1622	57.6881
	17.5472	17.9099	18.0451	17.7369	17.954	17.8726	18.1505	18.1263	18.1257	17.9835	17.6606	18.3171	18.8537	17.3622	17.7514	18.4232	18.5397	18.1004	18.512	17.944	18.5955	18.471	19.0186	18.559	18.4589	17.6385	19.391	20.911	22.4989	23.1282	26.5121	29.2754	31.4509	32.145	35.8956	38.264	38.6411	41.2701	41.9619	44.7971	46.2774	46.6447	47.9555	47.8059	49.4906	50.7625	52.2253	51.9969	52.912
	7.33768	7.82103	8.02289	7.69171	7.6913	7.61586	8.51713	8.44623	7.75684	7.99816	8.22766	8.90477	8.9428	7.7648	8.39077	9.32065	9.76249	8.93955	8.77933	8.72014	9.16563	8.61294	9.51943	9.15662	8.98289	8.79089	9.42434	11.4422	13.5098	13.3797	16.5896	19.4225	21.9788	24.1323	27.7409	30.7267	32.8861	35.2497	35.6607	39.2758	41.0248	43.2912	44.6507	45.8323	47.7266	49.3288	50.4669	51.4006	52.3875
	12.7349	13.7834	14.1125	13.7179	14.1362	14.0329	14.01	15.0386	14.3464	14.0945	14.2134	15.2984	15.4838	14.208	14.4651	15.5153	15.2578	14.5928	15.2226	14.7599	15.3317	14.862	16.1636	15.6172	15.3394	15.2716	16.9296	18.185	19.5341	20.65	22.3169	24.9656	26.7482	27.9264	31.3593	33.6138	35.7359	38.0029	38.7579	41.3973	43.4785	44.7704	46.0134	46.6782	48.7842	50.6022	52.6498	52.9545	53.5818
	38.1185	41.8342	43.2534	41.9991	42.088	40.6411	41.5198	42.3265	42.1446	41.078	40.4722	40.1825	39.9203	38.3456	38.516	39.1619	39.2592	37.9952	39.2219	39.2246	39.3692	39.0723	38.9205	38.1763	38.1188	37.1001	38.8283	40.6249	43.5186	44.5433	50.0196	54.8067	59.5657	63.8622	69.2261	73.504	77.3096	81.0956	81.7434	85.7361	85.3096	83.5478	82.7621	79.9637	79.5941	79.6707	78.5131	76.3486	73.9735
	24.99	25.8399	25.862	25.8815	25.6478	25.7679	25.8679	25.8095	25.6247	26.0799	25.5551	26.2808	26.6344	25.699	25.7811	26.5521	27.105	25.9723	26.0787	26.5328	26.6139	25.8901	26.9519	27.0545	26.2427	26.6023	27.9234	28.4872	30.6343	29.1855	32.8864	35.5342	37.2238	37.4845	41.23	42.3668	43.7268	45.9124	45.7236	48.3843	49.2862	50.2561	50.3655	51.7439	52.46	53.902	54.6026	55.2254	55.4442
	19.4529	20.289	20.3611	20.6605	21.3951	21.9079	24.144	25.0831	25.6931	24.9796	24.5393	23.8762	23.5294	21.5536	21.434	22.7984	22.7808	22.1487	23.3222	23.158	23.6379	23.1158	24.2721	24.176	24.0586	23.9888	24.8796	26.5294	28.3683	28.4814	32.8556	35.5823	38.2603	40.2186	44.6327	47.2265	49.1995	52.1732	52.614	55.6005	57.8937	59.0331	59.9881	60.3502	61.7332	63.7095	63.8656	63.3987	63.5561
	16.3976	16.9725	16.8805	16.9568	16.6898	16.6871	16.9439	16.9983	17.2218	16.4209	16.8882	17.7826	17.5703	16.2291	16.5327	17.603	17.4947	16.4943	17.0197	17.0877	17.8769	16.8134	17.7814	17.4834	17.6235	17.3973	18.5484	19.9171	21.3667	21.1486	24.6879	26.8348	28.6982	30.2859	33.5986	36.4175	37.5841	39.8332	40.6061	42.8716	44.197	45.8054	47.0639	47.4979	49.3309	51.147	52.3134	53.3596	53.4255
	12.9741	14.1765	14.5739	14.4161	14.0857	14.0356	14.564	14.8946	14.9498	14.2734	14.6413	15.8269	16.0225	14.9595	15.6021	16.6341	16.6445	15.4866	16.4156	16.3509	16.1629	15.933	17.0119	16.8801	16.6256	15.7614	17.1404	18.4238	20.0842	20.2113	22.4145	24.8211	27.0613	28.6498	31.8384	34.5511	36.3364	37.9706	39.7174	42.4574	44.7121	45.7841	47.772	48.9785	51.0635	52.4744	53.3306	54.6818	55.4525
	8.14599	8.10794	8.96502	8.00081	8.06369	7.85262	8.66297	8.41946	8.08075	8.1263	7.89989	9.12535	9.09579	8.22301	8.26575	9.06459	9.09497	8.76697	8.4269	9.04485	9.10969	8.86074	9.31537	9.04123	8.59256	8.90977	10.665	12.21	13.2884	12.9782	16.4184	18.6156	20.4464	21.9683	24.9422	26.9286	28.5713	31.1001	31.1195	33.3613	34.6157	36.4018	36.9103	36.9875	38.8581	40.5145	41.2713	42.2258	42.1674
	19.1542	20.6229	20.6822	20.0915	20.2953	19.3729	20.2466	20.9701	20.7241	20.1073	20.0334	20.8169	20.2804	19.7511	19.428	20.0365	20.5243	19.5873	19.9507	20.456	20.5742	19.6456	20.7702	20.4442	19.8802	20.5512	21.9253	23.296	25.5894	26.5619	29.8513	33.5022	36.3387	38.3506	42.3911	45.5715	48.1	51.1469	51.6682	54.2912	56.2696	56.39	56.7131	56.1711	56.5781	58.5339	58.91	58.8426	58.0129
	18.4575	19.5345	19.6737	19.3356	19.1305	19.0298	19.3918	19.7847	19.43	19.6136	19.3697	19.9105	20.0364	18.5221	19.3243	20.3841	20.0749	19.0097	19.5183	19.5918	19.5999	19.641	19.9964	20.3078	19.8456	20.0975	21.3685	23.1196	24.782	26.1871	28.9513	31.7138	34.4567	35.946	40.4473	42.7936	44.7833	47.8707	48.6611	51.5047	53.8945	55.0828	56.2439	57.5821	59.3478	60.9453	62.0944	62.525	62.4446
	27.355	27.8529	28.2363	27.3646	27.0677	26.8059	27.131	26.948	26.7946	26.2223	25.9879	26.3026	25.997	25.135	25.2395	26.1807	25.9319	24.8163	24.8412	24.8936	25.0465	24.5678	25.6607	24.8044	24.1837	24.9062	26.4533	28.2141	30.4952	31.3021	34.5003	38.406	41.5414	43.8063	47.9455	51.7154	54.2143	57.5043	58.2506	61.8397	63.6111	64.1999	64.7914	65.7413	67.3643	69.2064	69.5745	69.3629	69.2141
	59.3731	59.3348	57.6724	56.2193	54.7849	53.4318	52.8274	51.5967	50.8084	49.0714	48.1204	48.2785	46.8083	44.801	44.3899	44.7621	43.5564	41.1681	41.0753	40.3664	39.6031	38.4151	38.5972	37.053	36.4449	33.5335	35.4286	37.1079	39.3205	39.6004	44.5066	47.9847	51.3798	53.2143	57.8037	60.9716	62.6741	66.0453	66.2873	68.6536	70.6876	71.3681	71.219	70.9937	71.8374	73.0202	73.9819	73.5104	72.5552
	30.2724	30.5468	30.7027	30.1765	29.97	30.0977	30.1249	30.3069	29.7648	29.5783	29.46	30.1604	30.6923	28.9334	29.3784	30.5747	30.5576	29.4042	29.4559	29.0558	29.2001	28.8378	29.2549	29.401	28.5338	29.2035	31.2268	33.5098	35.7778	37.8648	40.9374	44.2506	48.0894	51.1948	55.9161	58.8366	62.4334	64.5087	65.0231	68.4741	70.044	71.8874	72.5003	73.157	74.9037	76.5385	77.2612	76.9991	77.438
	19.2006	20.2764	19.9021	19.9855	19.6597	20.0191	20.084	20.5129	20.7886	20.0611	19.8845	20.7569	20.611	19.6443	19.8852	20.9845	21.1582	20.0056	20.3434	20.3621	20.3547	19.9363	20.7565	20.7795	19.9266	20.3075	22.0583	24.1466	26.3915	27.0352	31.3332	34.7891	37.1458	39.4607	44.4672	46.8638	48.7412	52.1382	52.7048	55.5733	57.9416	58.8622	59.8251	61.36	62.7676	65.3282	65.5655	67.4142	67.3862
	12.3324	13.1818	13.4308	13.1785	13.14	12.7171	13.2838	13.7732	13.2057	13.184	12.9399	13.9767	13.838	13.0139	13.2934	14.2382	14.0276	13.5775	13.4694	13.8133	14.065	13.5995	14.4397	14.4845	13.4065	14.4949	15.9487	17.5108	19.6872	20.3701	24.667	27.3992	30.5342	33.3927	36.6559	39.8618	41.5226	44.1979	45.3017	48.121	51.1509	52.1609	52.804	54.3176	55.9322	56.9711	58.5581	59.2399	60.5707
	11.8061	12.3285	12.584	12.416	12.1786	12.261	12.3732	12.718	12.2012	11.6576	12.0583	12.9829	12.5821	11.5847	11.7909	12.8454	12.8427	11.8511	12.5527	12.6589	12.3367	12.1964	12.5669	12.7129	12.1931	12.371	14.0283	15.1939	16.9205	17.776	20.4884	23.1522	25.9713	27.7282	31.8651	34.1427	36.8331	39.4017	40.5708	44.1018	46.224	47.6497	48.566	50.228	51.8172	53.2917	54.9764	55.2957	56.4612
	20.1073	20.8543	21.0191	20.784	20.827	21.0716	20.7158	21.1033	20.784	20.6794	20.4711	21.0794	21.626	20.1588	20.3486	21.3799	21.611	20.5485	20.775	20.774	21.224	20.8731	21.648	21.3714	21.2174	20.1281	21.4838	22.6698	24.0558	23.6497	26.7404	28.4627	30.8162	31.8391	35.0634	37.3204	38.9881	41.3079	42.1559	45.0758	46.6594	48.2524	49.7023	50.5521	53.0319	54.9714	56.0021	56.4019	58.1342
	9.48811	9.77364	9.9348	9.50899	9.78427	9.13727	9.74999	9.81898	9.91029	9.3321	9.78583	9.8852	10.5172	9.74125	9.86796	10.6529	10.6225	9.94804	9.82906	10.4223	10.2606	10.0702	11.0831	10.6816	10.8414	10.3295	11.6936	13.5966	15.899	16.9413	20.6215	24.5408	27.1145	29.8052	34.1734	38.2226	41.0838	43.1508	45.2156	47.9787	51.0403	51.6311	53.5453	54.0661	56.8006	58.4965	60.2934	60.5174	61.4517
	20.135	21.2744	21.2193	21.1684	21.0834	21.0052	22.0605	22.3525	22.0517	21.5476	21.8184	22.1246	22.1865	20.8	21.0949	22.219	22.238	21.3496	22.0965	21.729	22.6126	21.8592	22.4427	22.4967	22.2075	22.4679	23.9928	25.6558	27.8962	28.5197	32.0394	35.4196	38.5993	40.7122	45.443	48.4735	50.9379	53.4269	55.0285	58.7009	61.116	62.0412	64.3076	65.1116	66.8602	69.4969	70.8027	71.1783	71.2753
	26.8303	26.9438	27.6094	27.0049	27.2416	26.3384	26.8451	27.046	26.9363	26.2871	26.7222	27.2835	27.5947	26.114	26.8136	27.7219	27.4766	26.7001	27.3373	26.9175	27.5087	26.4957	27.6	27.6724	26.8477	29.8343	32.8	35.9676	39.7334	41.3857	47.1672	52.1042	56.7554	60.6923	66.6544	71.0477	73.6307	77.6638	79.4468	83.4104	85.9276	87.2388	88.1572	89.3289	91.6744	93.0915	94.3227	94.3794	94.9019
	36.647	37.7832	37.4368	37.2238	37.2511	37.128	38.0871	38.1184	38.7585	37.7344	37.373	38.6581	38.8531	37.3842	37.2871	38.7667	38.6199	37.9111	37.9809	38.4667	38.5042	37.8999	38.875	38.8376	38.2425	40.749	43.4833	45.5764	48.8712	50.1332	54.8037	58.9253	62.1165	66.5611	72.1859	76.4976	79.6379	83.4639	85.7229	90.0738	93.9206	95.2141	96.081	96.9343	99.3378	101.4	102.776	102.896	102.507
	26.4968	26.7909	27.4808	26.8055	27.1726	26.8606	27.3039	27.6926	27.1478	26.7968	27.0266	27.4357	27.9073	26.7692	27.0494	28.0947	28.5878	27.5385	27.8726	27.879	27.6652	27.7267	28.1747	27.936	27.5249	27.5361	29.1528	30.0799	31.4163	31.5408	34.7049	37.5331	39.5567	40.9988	45.1087	47.2526	49.074	51.9034	52.9164	55.2577	57.4015	58.8091	59.9976	61.8162	63.9765	65.3188	66.9691	67.6252	68.9992
	24.7745	25.4558	25.6723	25.6473	25.8568	25.1495	25.4863	26.0969	25.5672	25.373	25.4563	26.1614	26.6303	25.3637	25.8088	26.2844	26.45	25.9282	26.0459	26.3382	25.9417	25.7911	26.5163	26.0675	26.032	25.4626	26.6024	27.5539	28.6071	28.9557	31.135	32.4348	33.9561	34.7616	38.0287	39.7403	40.814	42.752	42.9916	45.4095	47.203	48.3954	49.2114	50.4148	52.0821	54.1732	55.6468	56.88	57.8823
	29.6715	30.9181	30.4862	29.4374	29.3874	30.0643	30.0584	29.9418	29.0365	29.405	28.792	30.0103	30.1306	28.9036	29.6377	30.0937	29.9754	29.2009	29.1418	29.3571	29.5815	29.065	29.5196	30.3943	29.1117	29.1605	30.3695	31.0167	31.726	30.8232	33.6553	34.835	36.1979	36.6787	39.494	40.7482	41.5143	42.6532	42.3193	44.9211	45.8311	45.9084	46.2051	46.261	47.6456	48.5014	49.0696	49.4383	49.475
	22.3907	23.159	23.4361	23.1563	22.6393	22.6094	22.7659	22.589	22.2674	21.9339	21.757	22.3307	22.2801	21.0846	21.4252	21.9858	21.6236	20.9781	21.4514	20.9701	21.0423	20.4489	21.1935	20.7334	20.2671	19.209	20.24	21.3293	22.2861	22.309	24.5232	25.9008	27.1519	27.382	30.4983	31.3507	32.7072	33.2889	32.8663	34.9856	36.3248	36.1582	36.6093	36.1124	37.2329	38.1369	39.0798	39.1836	38.8626
	34.6041	34.5753	34.5211	34.2987	33.4693	33.0455	33.1789	33.4135	32.5039	31.8302	31.7735	32.7252	32.416	30.6859	31.1482	31.6735	31.5122	30.3969	30.5133	30.4965	30.4915	29.6048	30.5207	30.0765	29.7765	28.0662	29.1287	29.9139	30.5249	29.7123	32.572	33.4902	35.8036	35.8634	39.3829	40.4632	41.9811	42.5941	42.9737	45.0005	46.105	46.665	46.9137	46.754	48.026	48.805	49.574	48.9517	48.3767
	17.2391	17.8119	17.5029	17.1735	16.5172	16.0368	16.4242	16.4974	16.1345	15.4769	15.488	15.5878	15.6796	14.1527	14.4332	14.9644	14.9492	13.903	13.9754	14.1331	13.9065	13.4031	13.8992	13.5055	12.8172	11.72	13.0102	13.36	14.1144	14.5657	15.7085	16.7304	17.8527	18.5146	20.9172	22.3547	23.3721	24.1972	24.423	26.2068	27.4408	28.0785	28.1168	28.2911	29.6695	30.6033	31.091	30.9227	30.7978
	49.5895	50.6123	50.5521	49.7872	49.5058	49.1361	49.8049	49.2921	48.427	48.0384	48.7998	49.5503	49.6154	47.4364	47.7133	49.0662	48.1123	48.0417	48.1803	47.8703	48.2365	46.7544	48.4411	47.3958	46.4025	50.4759	51.3599	52.2563	53.2998	50.6156	55.0198	56.8623	59.9421	60.0725	65.1655	67.8984	70.5732	73.1952	74.095	78.1726	80.858	81.3266	84.1145	85.3469	87.7457	90.999	91.5499	92.2166	93.2749
	2.74245	3.32962	3.54169	2.89967	2.788	2.68503	3.05795	3.15952	2.93475	2.47068	2.27991	3.17094	2.70368	2.13842	2.91475	3.45225	3.3598	2.3995	3.2745	3.2125	2.89914	2.47071	3.27597	2.93077	2.57603	2.22375	3.50749	3.84046	4.97435	5.08134	6.39265	8.084	8.76966	9.2455	12.1443	13.6673	14.7649	15.8872	16.3828	18.3761	20.7515	21.0714	22.3911	22.7898	25.2865	26.8918	28.4127	28.9266	30.0186
	39.0883	40.3895	40.1189	39.1889	39.3039	38.5256	39.6175	39.3589	38.5704	38.4113	38.7208	39.5149	41.4996	40.6378	41.2466	43.3157	43.5434	42.333	44.0161	44.1013	44.4291	44.5202	44.9115	44.8604	44.382	46.5783	49.0164	49.845	52.8008	51.3152	57.6472	61.22	64.053	66.9048	73.0009	76.6365	79.8609	84.1355	87.3986	90.8261	93.9533	95.3001	96.6343	98.0268	100.166	101.989	102.864	103.974	103.85
	24.995	25.633	25.8437	25.3688	25.494	25.1733	25.4422	25.9178	25.4878	25.336	25.6694	26.5912	26.6061	25.6743	25.4306	26.4627	26.4518	25.8919	26.1923	26.2887	26.3252	25.2847	26.7122	26.5553	25.9676	25.4944	26.5351	27.5221	29.1366	29.4212	32.9661	35.0461	37.8974	39.3915	43.4424	46.8256	49.1583	51.858	53.139	55.8429	58.3778	59.4598	61.5681	62.5528	64.5654	66.3196	67.7007	68.0546	68.7422
	25.0016	25.2965	25.9919	25.2883	25.781	25.3067	26.2849	26.4792	25.794	25.7048	26.0793	26.4923	26.4033	25.0599	25.3188	25.9752	26.0843	25.4927	26.0544	26.0693	26.262	25.7364	26.7022	26.689	25.986	27.7372	29.5474	31.7549	34.499	35.7456	39.1336	43.2907	45.4019	48.6357	53.4402	57.7159	59.4609	61.7607	62.7089	66.0232	68.4093	69.3719	70.4597	71.0693	72.5673	74.192	74.8875	75.2725	75.9806
	21.3993	21.6272	22.7326	22.1169	21.3647	21.6019	22.2088	22.8627	22.5967	22.09	22.4335	23.4985	23.0209	21.7407	22.3211	22.9395	23.3608	22.2647	22.2422	23.061	23.1216	23.3016	24.1247	23.2714	23.0169	23.8238	26.4826	28.1928	30.319	31.9867	35.8289	38.7924	42.497	45.5503	50.4354	52.7991	54.4881	57.5965	58.2552	60.7269	63.1439	63.6832	64.2856	64.399	66.1632	67.922	68.4446	67.5798	68.1158
	1.95294	3.09111	3.34771	2.81158	2.83122	2.26777	2.70516	2.83573	2.62831	2.58084	2.08252	2.91668	3.55415	2.36465	2.44765	2.96902	3.12882	2.22206	2.4135	2.69255	3.11657	2.48059	3.20982	2.67938	2.56628	2.27391	3.42	4.78105	5.43904	6.01143	8.71393	10.5687	12.8706	13.9454	17.6433	20.1722	21.9872	24.5426	26.2224	28.8149	30.7453	32.8525	34.6515	34.5758	37.0581	39.2911	40.4138	41.7552	41.3325
	11.3706	12.3698	12.5474	11.8938	11.7722	11.6603	12.1355	12.5349	12.466	12.267	12.5446	13.5673	13.0842	11.5803	12.1266	12.8725	12.8981	12.4836	12.4663	12.2644	12.3384	12.5662	13.0757	12.4242	11.9255	11.8704	12.9874	13.9273	15.4082	16.9561	18.7784	21.2026	23.6325	25.1191	29.3063	31.7303	33.6286	35.9424	37.1884	40.2692	42.3994	43.3874	44.8468	45.1116	48.2299	50.2285	51.8902	52.2388	53.3113
	26.8568	26.9035	27.649	27.1332	27.359	27.1451	27.2667	28.056	26.941	26.8991	26.2295	27.7503	27.5349	26.3823	26.7907	27.3127	27.3298	26.2962	27.1763	27.3758	27.7629	27.4551	28.4394	28.5931	28.0102	28.8191	30.558	31.9847	34.5488	35.7779	38.6138	41.4362	46.0209	48.3943	54.4591	57.7921	62.3814	66.8145	69.5082	72.8467	77.5367	79.936	82.7688	84.3326	87.494	89.7841	91.6773	92.4197	93.4321
	10.9876	11.6222	11.863	11.3122	10.8763	10.5958	11.0036	10.9798	10.5586	9.79751	9.6142	10.361	10.3233	8.71624	8.99062	9.70865	9.90129	9.24744	9.27622	9.11677	8.92738	8.41179	9.22254	9.01343	8.76826	8.24632	9.13565	9.38007	10.1205	9.12501	11.7665	13.1824	14.057	14.4041	16.5996	18.5733	19.6127	20.8576	21.6573	23.1915	25.0408	25.4559	26.1397	27.2221	28.4692	30.2009	30.7134	31.6286	31.8475
	13.0132	13.3981	12.9985	13.0663	13.3833	12.9032	13.4984	13.7347	12.6027	12.8493	12.4248	14.1619	13.7588	12.5582	12.4184	13.5268	13.103	13.1921	14.4464	13.1127	13.5338	13.1291	13.9057	13.7519	13.3181	12.3852	13.7978	14.7592	15.1776	15.7304	16.125	18.8997	20.119	21.0284	23.4575	24.1	24.486	25.7278	25.4573	27.8292	29.2048	29.4682	30.307	30.7362	32.3548	33.4766	34.1693	34.9115	36.0824
	22.7639	23.7441	23.8059	23.4741	23.6871	22.5667	23.2761	23.229	23.6347	24.2509	23.6737	24.1686	25.0544	23.0732	23.3458	23.98	24.3029	23.3368	23.4043	23.8718	23.7441	23.5151	23.6362	24.2293	23.356	24.6972	25.7538	27.1554	28.8838	28.8967	31.3485	34.0076	36.0862	37.8501	41.3794	43.4399	44.9961	47.8683	49.0333	51.8845	53.4535	54.006	54.5524	54.5754	55.6537	56.4326	56.0253	55.6571	54.7258
	39.352	39.4907	38.902	38.366	38.1545	37.3562	37.4986	37.0519	36.456	35.1095	35.0294	35.2825	35.6585	33.7162	33.5327	33.6252	33.7616	32.3559	32.5508	31.8161	31.1276	30.7459	30.9968	30.4749	29.3286	27.2239	28.0336	28.1355	29.2319	29.0715	31.0502	32.8399	33.8337	33.9375	37.0102	38.761	39.4645	41.6331	41.1455	43.1433	44.5623	44.6133	45.3192	45.5372	46.161	47.744	48.0991	48.5325	47.9206
HEK TKO	27.7304	28.3688	28.2709	27.8528	28.1957	27.7764	27.6143	28.3482	28.8829	28.4349	27.9681	29.0388	28.6434	28.3052	28.1304	29.3056	28.666	27.9567	28.491	28.7445	27.9291	27.6175	27.8498	29.2274	28.2103	29.5873	29.5169	30.2305	31.468	32.0218	33.3886	34.1389	35.6452	37.9624	38.9565	40.3303	42.1992	44.1938	44.9848	46.1754	49.3919	49.9212	51.6879	54.1612	55.4079	56.5179	59.3976	61.3865	62.4023
	31.1914	31.9153	32.1835	31.5042	31.5898	30.8546	30.5442	31.6406	32.3705	31.7571	31.3256	32.2204	32.0309	31.535	31.4115	32.0617	31.7015	31.0753	31.6232	31.6389	31.1138	30.6375	31.0379	32.2794	31.1283	32.0907	31.8255	32.4279	33.5149	33.8198	35.242	35.8416	36.9359	39.0459	39.826	40.7036	42.6215	44.1577	45.029	46.4143	48.6286	49.2909	50.9371	52.7563	53.6848	54.6919	57.1962	59.587	60.3438
	24.1196	24.4985	24.5415	23.9025	24.2459	24.1029	23.4352	24.4147	25.0203	24.2247	23.9334	24.5606	24.7476	24.175	23.8306	24.6432	24.2609	23.6632	24.4228	24.3411	24.1768	23.3804	23.4817	24.6195	23.7223	24.5141	24.4564	25.1025	26.3153	26.7924	28.2317	29.1994	30.5545	32.7318	33.4982	34.6955	36.7106	38.3838	39.5911	40.4105	42.9177	43.7167	45.3031	47.2767	48.2329	49.4138	52.1069	54.4697	55.3057
	25.7244	26.0826	26.2584	25.7753	26.231	25.3049	25.525	26.2092	27.0455	26.0278	25.8768	26.9348	26.8019	26.5641	25.9292	26.6419	26.2421	26.1591	26.3894	26.7857	26.1048	25.8355	25.9852	27.07	26.1433	26.7564	26.625	27.3299	28.5176	28.961	30.6203	31.3889	32.9184	35.0054	35.8446	37.122	38.7802	41.0635	41.5593	42.9889	45.0665	45.6104	47.4277	49.7388	50.6625	52.0282	54.6149	56.499	57.3233
	24.9252	25.8546	25.7784	25.4685	25.8021	24.8815	24.6331	25.4039	26.0265	25.3689	25.4305	25.7481	25.753	25.1213	24.8	25.7201	25.2604	24.5554	25.3099	25.4243	25.2883	25.1576	25.6397	26.6983	26.0312	26.7227	26.3256	26.5917	27.2687	27.5258	28.6068	29.7187	30.5706	32.529	33.472	34.5746	36.5402	38.7353	40.0768	41.5444	44.8493	46.2654	48.8932	51.9495	53.6886	55.2347	59.002	62.0253	63.5994
	29.9606	30.7047	30.6048	30.2864	30.7567	29.9262	29.6847	30.6301	31.1676	30.4612	30.0213	31.0592	31.0246	30.5564	30.3841	31.124	30.6458	30.1227	30.652	30.9824	30.5326	30.0536	30.1096	31.2791	30.482	31.285	31.0275	31.8888	32.8076	32.9587	34.1853	35.0686	36.6835	38.3239	39.3276	40.5424	42.8954	44.8689	46.1512	47.4347	50.4445	51.5173	53.4733	56.5107	57.8261	59.6496	63.0977	65.5851	67.6013
	29.1278	29.6559	29.7257	29.1743	29.7968	29.3934	28.884	29.6337	30.1274	29.6847	29.185	30.012	29.907	29.4264	29.4132	29.978	29.6167	29.0943	29.6683	29.8161	29.3491	28.8963	29.1605	30.207	29.4812	30.322	29.8208	30.1081	31.1243	31.3137	31.8964	32.5019	33.3919	34.7235	35.5179	36.1476	37.8134	39.6219	40.0284	40.9966	43.2939	44.0074	45.2047	47.4575	48.556	49.3706	52.0532	53.8851	54.9675
	24.4365	24.9106	25.1021	24.4207	24.768	24.302	24.1607	24.8401	25.8735	24.8585	24.6314	25.3228	25.3612	24.9449	24.7045	25.3003	24.7752	24.5402	24.7259	24.9463	24.3369	24.2457	24.1355	25.3384	24.5615	25.5927	24.9494	25.2418	26.4149	26.2115	27.8111	27.8602	28.6794	30.0672	30.9935	31.3735	33.5443	34.6101	35.431	36.2309	38.5786	39.5826	40.5939	43.0031	44.1024	45.1184	47.9904	50.2901	51.577
	23.3585	23.8357	23.7236	23.5364	23.2546	23.3376	22.6456	23.4227	24.2436	23.5181	22.8694	24.0353	23.8558	23.3021	23.0753	23.7193	23.6403	22.7052	23.5243	23.5713	23.2664	22.5775	22.7942	23.8067	23.249	24.5367	24.2954	24.898	25.6455	25.7011	27.1711	28.1948	28.8536	30.8329	31.4858	32.5452	34.4185	35.2753	36.6833	37.7846	40.1864	40.9721	42.0087	44.0829	45.2415	46.1846	48.9547	50.6443	52.2925
	24.0328	24.1919	24.3875	23.8391	24.2307	23.6578	23.1023	24.2211	24.8438	24.1286	23.8981	24.4573	24.4428	24.0953	23.8373	24.2983	23.9212	23.5043	24.1516	24.4357	24.0126	23.3471	23.5523	24.6172	24.0048	25.7972	25.7199	26.2438	27.2088	27.748	28.9179	29.9784	31.2244	32.9916	34.2346	35.0925	36.959	39.0785	40.347	41.3561	43.9026	44.9311	46.6096	49.1634	50.2491	51.7474	54.2932	56.3063	57.8473
	22.4678	23.2684	22.9378	22.7469	22.9942	22.5122	22.0024	22.6813	23.2648	22.8533	22.5935	23.1466	22.9137	22.7389	22.4428	22.9855	22.7647	22.2296	22.5856	22.9432	22.4818	22.1628	22.4544	23.2913	22.6848	23.573	23.1762	23.3238	24.5757	24.7217	25.7127	26.4087	27.2184	28.3843	29.2332	29.7391	31.2561	32.9038	33.5699	34.4496	36.4093	37.2003	38.6777	40.6629	41.8523	42.8737	45.0174	47.3509	48.6351
	23.2267	24.1072	24.2207	23.7359	24.09	23.207	23.3154	23.7473	24.6197	23.9944	23.6414	24.5216	24.2709	23.9706	23.9834	24.7139	24.2284	23.8449	24.3832	24.4885	24.2522	23.7932	24.2736	25.1927	24.6097	25.01	24.8301	25.1683	26.2914	26.4974	27.4975	28.1542	29.4047	30.8396	31.5133	32.2669	34.1647	35.514	36.1229	37.11	39.4507	40.2113	41.6078	43.8402	44.877	45.8136	48.5325	50.1813	51.4789
	20.6046	21.2481	21.2449	20.8303	20.7738	20.2133	19.801	20.8215	21.2823	20.7745	20.4626	21.1593	21.2166	20.9483	20.8298	21.5632	20.8121	20.4859	21.3777	21.2932	20.9826	20.7758	20.7705	21.7636	20.8441	21.3571	21.0112	21.534	22.6643	22.7949	24.0368	24.7275	25.7786	27.2463	27.9607	28.3234	30.0811	31.7937	32.4112	33.2284	35.8506	36.4738	37.8196	39.9281	41.0092	41.7797	44.4714	45.9846	47.3806
	22.9985	23.3257	23.6068	23.1656	23.4903	22.6363	22.4956	23.1921	23.5485	23.1368	22.7455	23.5241	23.2595	23.0221	22.9595	23.4559	22.7809	22.5356	23.0883	23.0854	22.5028	22.2646	22.5397	23.434	22.4011	23.6495	23.11	23.7556	24.4403	24.4488	25.6885	26.3603	27.1061	28.7212	29.1589	30.0212	31.4792	32.9354	33.2563	34.2428	36.4076	37.3218	38.2018	40.1902	40.9863	42.0764	44.3814	46.1192	46.9743
	22.4094	22.8478	22.7079	22.4957	22.7138	22.0788	22.0462	22.7412	23.1558	22.5213	22.3362	22.8375	23.0904	22.7397	22.5031	23.1624	22.7448	22.2064	22.9383	23.1528	22.4793	22.1629	22.2932	23.4415	22.6113	23.676	23.205	23.8759	24.9218	25.0982	26.4647	27.0822	28.4766	30.0226	30.7841	31.7383	33.5282	35.1837	36.119	37.3125	39.8531	40.4759	41.7786	44.0159	44.8116	45.9298	48.4917	50.3088	51.1484
	26.0671	26.7808	26.567	26.1948	26.6586	25.9916	25.7261	26.667	27.0882	26.3753	26.2785	27.0803	26.9279	26.8045	26.8942	27.3505	26.752	26.3245	27.0824	27.2718	26.526	26.1503	26.191	27.4876	26.4812	27.4543	27.2093	27.865	29.0998	29.596	31.3745	32.1624	33.761	35.3248	36.4254	37.6111	39.3949	41.5335	42.5784	43.6189	46.3368	47.1456	48.645	51.1942	51.5833	52.9502	55.322	57.186	58.3691
	24.7002	25.2648	25.1871	24.8437	24.9832	24.4967	24.2735	25.122	25.6111	24.8686	24.6393	25.3691	25.2318	24.9672	25.0824	25.6603	25.1599	24.7525	25.5048	25.4808	25.0301	24.7301	24.8335	25.7389	25.0145	25.793	25.3816	25.9984	26.9409	27.1379	28.4011	29.0656	30.1495	31.6023	32.247	33.236	34.7889	36.3359	36.9757	37.8969	39.926	40.5691	41.6761	43.6459	44.2884	45.0094	47.0971	48.8334	49.5534
	26.8661	27.3701	27.5278	27.0264	27.1716	26.7555	26.4157	27.4536	27.6588	26.9984	26.9086	27.5463	27.4585	26.9952	27.2575	27.9762	27.4464	26.8168	27.5852	27.6618	27.3597	26.8021	27.2039	28.2636	27.1768	28.124	27.9177	28.3589	29.2951	29.7415	30.9492	31.7643	32.7903	34.1853	35.0331	35.9711	37.9259	39.7106	40.1389	41.3933	43.6166	44.4318	45.837	48.1346	48.5939	49.9988	52.3265	54.5435	55.1121
	24.0467	24.5614	24.3306	23.8915	24.0985	24.0157	23.4746	24.3739	24.8641	24.2763	23.6169	24.3738	24.7769	24.0103	24.2321	24.7426	24.2074	23.5066	24.3364	24.4826	23.9695	23.5865	23.809	24.7034	23.901	24.9985	24.373	24.9698	26.0949	26.251	27.5394	28.0892	29.0949	30.6791	31.628	32.3828	34.5509	35.7732	36.9737	38.1383	40.7671	42.0922	44.318	47.5012	49.739	52.3108	55.9739	58.2198	59.1519
	32.5384	32.915	32.9185	32.4806	32.2904	32.139	31.7443	32.6477	33.3899	32.3529	32.1002	32.8207	32.6994	32.3429	32.3909	33.0624	32.0824	31.733	32.6026	32.6689	32.1763	31.6453	32.1093	33.2343	32.2621	33.3584	33.371	33.7956	34.8423	34.9265	35.8566	36.9175	38.0597	39.6381	40.5442	41.4199	43.3491	45.5309	46.3903	47.7703	51.1171	53.0036	55.3927	59.8328	63.1442	67.4229	71.1465	73.6792	75.0852
	26.3681	26.7121	26.7591	26.2676	26.5545	25.9684	25.709	26.5331	27.1815	26.4424	25.87	26.9264	26.9143	26.2279	26.2678	26.689	26.1366	25.6716	26.259	26.6538	26.0335	25.6995	26.1281	27.1058	26.2563	26.8949	26.7821	26.8939	28.1685	28.3279	29.4084	29.9551	31.3137	33.0575	33.7273	34.6566	36.4538	38.1496	39.1	40.2036	42.6809	43.8084	45.3776	48.1592	50.0083	51.7073	54.409	56.9064	58.02
	45.7156	46.3006	47.5539	46.94	46.8973	45.7181	46.4413	47.1191	47.6194	46.9631	46.2262	47.8923	47.2554	46.6516	46.7278	48.2133	47.8198	46.5229	47.5967	47.2983	46.6616	46.6318	47.0163	47.6344	47.4148	48.6202	48.414	48.8302	49.4349	50.4835	52.0327	52.5801	54.9377	56.4779	57.8345	59.4318	61.3567	63.6886	64.4211	65.3914	68.9621	68.8785	71.0764	74.093	75.536	76.11	80.1698	82.2727	83.3863
	23.9231	24.3499	24.5169	24.2539	24.4963	24.1324	23.8724	24.4318	25.0038	24.4821	24.3046	25.0426	25.0453	24.2967	24.1052	24.9611	24.3587	23.5534	24.0779	24.4635	23.8985	23.5528	23.6269	24.6755	23.907	24.5483	24.2351	24.8215	25.6315	25.758	26.9252	27.3489	28.3215	29.8747	30.5301	31.394	32.9169	34.7614	35.5123	36.9079	39.6512	41.0657	43.1258	46.6096	49.8495	52.4428	56.2449	58.9068	60.2494
	21.9971	22.2217	22.3351	21.843	22.2538	21.364	21.1627	22.0705	22.4211	21.892	21.5836	22.1926	22.2097	21.8199	21.8872	22.2562	22.2367	21.0445	21.8676	21.867	21.3469	20.6366	21.2681	22.0076	21.3222	22.4332	22.2751	22.7872	23.5218	23.9257	25.1342	25.649	26.7546	27.9447	28.8988	29.8087	31.6928	33.4533	34.1215	35.0325	37.5846	38.4217	40.5948	43.1174	44.8744	46.2794	49.2317	51.3946	53.2256
	22.4959	22.8302	23.1089	22.5944	23.0279	22.398	22.0484	22.9218	23.1111	23.7065	22.7363	23.3785	23.0091	22.8317	23.0172	23.4505	23.5943	22.3856	22.7988	23.7196	22.81	22.7052	22.3898	24.0633	23.0265	23.8718	23.603	23.9902	25.2038	25.0211	26.5613	27.1111	27.9776	29.8016	30.658	30.964	33.2696	34.6139	35.4409	36.5765	38.9976	39.2171	41.0548	42.631	43.841	45.5541	48.7922	49.9104	51.7599
	23.1092	22.8457	23.2988	23.6091	22.6628	22.4801	22.2289	22.9913	22.9609	22.4883	22.5993	22.6371	23.4085	22.9448	23.1384	22.6472	21.9288	22.7431	23.2296	21.9904	22.0234	22.7466	23.2242	22.0316	22.1933	23.2099	23.1809	23.8564	25.3412	26.8469	27.1357	30.3494	30.8822	32.5136	34.9599	36.7178	37.4181	38.4031	40.95	42.7994	43.6186	45.0325	47.4826	49.1074	51.6113	51.88	52.9328	55.2757	57.1971
	51.5591	51.5815	51.6871	52.2108	50.8498	50.4931	50.6309	51.3229	51.3333	50.6453	50.0134	50.1932	50.9732	49.7369	50.147	49.0789	48.1368	49.145	49.6515	47.705	47.4647	48.6211	49.1259	47.2508	46.9046	48.0666	47.8587	48.8843	50.413	52.9972	53.4017	57.4729	58.0124	59.9542	63.2117	66.0598	67.218	69.1197	71.8937	74.6857	75.3069	77.0933	80.3664	82.4543	84.6312	85.525	86.4568	88.3606	90.6887
	23.4603	23.3123	23.5849	24.0036	23.1548	22.8066	22.82	23.6123	23.4151	23.1792	22.8685	22.9129	23.6216	22.9932	23.5455	23.0746	22.3622	23.2174	23.6142	22.4585	22.3186	23.0656	23.6033	22.509	22.3628	23.3537	22.8559	22.901	23.7809	25.1125	25.1454	27.459	28.0257	29.1572	31.1913	32.957	33.5146	34.7686	36.6935	38.7141	39.339	41.052	43.6814	45.3097	47.1566	47.7034	49.0308	50.9217	53.2128
	22.6589	22.5021	22.718	23.1541	22.2615	21.8893	22.0867	22.4401	22.6006	22.1584	21.9432	22.2072	22.8187	21.9179	22.3678	21.975	21.6339	22.3123	22.6058	21.5752	21.5951	22.4215	22.8676	21.9138	21.5981	22.3921	22.022	22.3179	23.0051	24.3622	24.0997	26.6229	27.074	28.0494	29.8823	31.2017	31.7521	32.8673	34.4819	36.1479	36.5986	38.0661	40.1021	41.6156	43.3358	43.5774	44.4643	46.338	48.4382
	20.1697	20.25	20.5468	21.0335	19.9771	20.019	19.8362	20.5146	20.4819	20.2165	20.1224	20.2959	20.7765	19.9348	20.6761	19.8362	19.6646	20.4252	20.4885	19.6086	19.7526	20.038	20.7817	19.5447	19.3997	20.2598	19.7477	19.9281	20.4759	21.7559	21.2803	23.6494	23.632	24.3932	26.4018	27.6002	27.8174	28.7933	30.3942	32.1343	32.446	33.6153	35.6506	36.9465	38.5308	38.7323	39.6429	41.2357	42.9847
	20.9491	21.0687	21.1161	21.6268	20.6731	20.6925	20.6174	21.1606	21.2798	20.5942	20.6589	20.9838	21.4406	20.9564	21.1614	20.687	20.2601	21.0047	21.2254	20.4452	20.2928	20.9187	21.4557	20.3115	20.256	20.949	20.4111	20.727	21.5634	22.5901	22.2504	24.6828	24.7396	25.5332	27.2821	28.7222	29.0112	29.902	31.5522	32.9401	33.101	34.1306	36.3386	37.4323	39.1047	39.1964	40.161	41.5227	43.2659
	22.3182	22.7111	22.7717	23.0735	22.1927	21.979	22.0089	22.6285	22.6462	21.8022	21.9931	22.0424	22.6179	21.9731	22.2596	21.6998	21.3958	22.3094	22.2651	21.3804	21.2149	21.9376	22.4268	21.3649	21.1311	21.7576	21.3314	21.8012	22.4761	23.6629	23.4936	25.8984	25.9046	26.6484	28.3209	30.2045	30.3338	31.1632	32.727	34.3404	34.6006	35.503	37.593	39.0468	40.5847	40.7966	41.7404	42.8132	44.6366
	25.5337	25.2489	25.6464	26.0915	25.2728	25.0801	25.0473	25.7363	25.6202	25.3143	25.0841	25.2538	25.7173	25.119	25.4951	25.1804	24.4572	25.135	25.6432	24.5123	24.6317	25.2718	25.6858	24.6346	24.5272	25.6187	25.0329	25.4877	26.4247	27.9086	28.0237	30.9507	31.3563	32.3778	34.765	36.5793	37.3494	38.382	40.2167	42.0292	42.6961	43.9287	46.2356	48.0091	49.8116	50.0109	51.183	52.8923	54.7511
	22.9584	23.0547	23.3742	23.6553	23.0668	22.6594	22.5434	23.4658	23.1717	22.9914	22.9534	22.9903	23.6339	22.7773	23.3023	22.8207	22.1227	23.0674	23.3707	22.6941	22.5797	23.1273	23.6199	22.6931	22.4639	23.7217	23.5302	23.9141	24.947	26.2855	26.1961	28.8418	28.9787	29.8915	31.7992	33.3526	33.5939	34.6053	36.3142	37.7009	37.808	38.8499	41.2974	42.2174	43.9535	44.2802	45.1188	46.2037	48.0476
	28.5316	28.4555	28.7873	29.1022	28.2186	28.059	28.169	28.816	28.9282	28.2423	28.2503	28.3439	29.076	28.2551	28.6061	27.9005	27.6731	28.4562	28.7769	27.8786	27.7012	28.5194	28.9571	27.7656	28.2613	31.2271	31.3924	31.867	33.2289	35.1484	35.2217	37.8911	38.4539	40.1855	42.523	44.9684	45.8225	47.3939	49.4933	51.8415	52.826	54.2515	57.0616	59.0549	61.2645	61.8564	63.4573	65.4698	67.7333
	44.0133	43.8078	43.7843	43.8987	42.3942	42.2394	42.1783	43.0717	42.8058	41.7978	41.5982	41.3259	42.2934	41.388	41.8112	41.1124	40.4876	41.3843	41.3315	40.1288	40.1383	40.6148	41.2243	39.6273	38.9801	38.0807	38.0619	38.7742	40.6371	42.9003	43.7839	47.5457	47.9141	50.3671	53.8352	56.4329	57.7664	59.6912	62.7239	65.573	67.099	68.9508	71.9333	74.5862	76.8339	77.6417	79.177	81.4814	84.0198
	20.7476	19.2858	19.4105	18.5817	17.4542	16.8912	16.0312	14.5837	14.2626	14.11	14.7071	12.7918	11.8312	11.6804	12.6806	11.3009	9.6637	9.33733	9.39383	9.88099	8.27904	7.41696	7.87616	8.1818	6.94616	7.37477	7.43921	8.40598	10.5388	12.4239	14.6865	16.2623	18.5087	20.4029	21.6552	23.053	25.6268	26.9177	27.4101	28.0743	32.2424	31.8716	32.2119	34.7041	34.6963	34.3884	36.6166	37.5144	38.2183
	14.5911	12.9391	13.1074	12.3025	10.9538	10.4055	9.50288	8.07861	7.61752	7.40933	8.05937	6.21066	5.53883	5.20941	5.61976	4.58164	2.93651	2.95429	2.91644	2.91202	1.85924	0.873036	1.38831	1.07948	0.168599	0.0398284	0.125333	0.77964	2.81845	4.59832	6.73767	8.47835	10.474	12.4787	13.6435	14.975	17.7722	18.949	19.4394	20.4862	24.2304	23.6787	24.21	26.6343	26.6935	26.6785	28.5037	29.6966	29.8479
	24.231	23.6096	24.0187	23.1641	22.7705	22.8572	22.0325	21.7292	21.3182	21.7343	22.4497	20.8063	21.1799	20.4681	21.1159	20.937	19.8521	20.1813	20.0331	20.4098	19.6387	19.0694	19.8647	20.4247	19.3652	21.9086	21.7813	21.5604	23.2708	24.6351	26.1297	26.5597	27.7989	28.9756	29.8058	31.0209	32.6595	34.4538	34.9772	36.2156	38.9437	39.8478	40.3148	42.6427	43.4897	44.1899	45.1047	46.7839	47.1067
	16.3241	15.5126	16.4346	16.4005	15.535	15.5695	15.2237	14.8793	14.8504	15.3773	16.4757	15.3209	14.7844	14.9831	16.0793	15.3799	14.1107	14.7264	14.8899	15.8345	15.2376	14.5338	15.1265	15.5564	14.7109	15.8109	16.162	16.4292	18.0696	19.1554	21.5815	23.0092	25.9556	27.9602	28.9203	30.9152	34.2417	36.379	37.6272	39.484	44.727	45.1839	46.9527	50.7343	52.0561	53.2392	56.3582	58.9142	60.131
	25.9892	24.3245	24.0302	22.9054	21.6009	21.0694	19.9371	18.7399	18.0329	17.5845	17.8928	15.863	14.895	14.1284	14.636	13.3796	11.5127	11.5826	11.0925	11.0077	9.99448	8.90348	9.24012	8.86204	7.57317	9.33229	9.19814	9.42576	10.921	12.2312	14.0468	15.3393	17.7765	19.7158	20.7481	22.1986	24.93	26.4056	27.505	28.837	32.7439	32.8941	33.8003	36.605	37.3928	38.1924	39.6715	41.3692	41.9448
	28.4566	26.6596	26.302	25.5949	23.6345	22.9711	21.898	20.4262	19.4964	19.153	19.3585	17.3948	16.2983	15.6591	15.9021	14.4279	12.8508	12.5923	12.1088	11.9651	10.5895	9.55272	9.83313	9.41244	7.90225	7.45543	7.67089	7.68344	9.16937	10.517	12.4318	13.5235	15.8584	18.0445	19.0345	20.7319	23.3001	25.0779	25.9871	27.0235	31.4595	31.2983	32.2527	34.7818	35.6638	35.8502	38.0779	39.4	40.4844
	23.1876	21.967	22.5299	22.8901	22.1801	22.1508	21.978	21.4515	21.8078	22.0881	22.8396	21.8854	21.515	21.6877	22.4325	22.2938	21.3623	21.9109	22.1147	23.0034	22.0943	21.6625	22.3639	22.6566	21.942	23.9385	23.8097	24.693	26.0865	27.6646	30.5221	32.5245	35.401	38.471	39.3462	42.1372	45.6332	48.4631	49.6012	51.4205	56.3789	57.6118	58.8411	61.367	63.2193	63.7589	66.5784	69.0337	69.9865
	12.2664	11.6602	12.0595	12.3825	11.7527	11.6652	11.8145	11.4762	11.2886	12.031	12.8471	11.7546	11.6166	11.8904	13.1076	12.3184	11.8362	11.7646	12.5174	13.0489	12.3292	12.1575	13.2313	13.5302	12.9339	13.475	13.583	13.8421	15.3883	16.3978	18.4063	19.6271	21.9193	23.8345	24.7855	25.8967	28.4226	30.2841	30.6554	32.275	36.3919	36.8053	37.7016	40.6261	41.6452	42.2676	44.6224	46.2623	47.9206
	40.2756	38.0786	37.1242	36.2955	34.3969	33.5945	32.0274	30.0404	29.3598	28.9899	29.0599	26.9494	25.8014	24.8233	25.5387	24.5582	22.3804	22.3759	21.9124	22.0966	20.7601	19.7552	19.9834	19.7399	18.2296	16.4305	16.497	17.0292	19.1073	20.8169	23.1941	24.7197	27.443	29.6001	30.393	32.3046	35.5885	37.4581	38.0848	39.1453	42.9643	43.202	43.151	46.1044	46.4663	46.3786	47.9625	49.0341	49.223
	21.2816	20.307	20.9073	20.9364	20.5642	20.5844	20.3912	20.0874	19.9908	20.6716	21.0745	20.0833	20.0889	20.1539	20.955	20.5853	19.6533	20.1567	20.4445	20.8414	20.131	19.8776	20.6112	20.9471	20.0776	20.94	20.8433	21.1273	22.3616	23.7646	25.1187	26.0823	28.4674	30.1257	31.0535	32.7573	35.512	37.5137	38.3239	39.6427	43.6091	44.6185	45.6702	48.5948	49.6922	50.679	52.9678	54.8129	56.1763
	31.332	30.331	30.9394	31.119	30.2194	30.5274	30.3163	29.8729	29.6925	30.0062	30.7234	29.5363	29.2403	29.2734	30.233	29.8378	28.9678	29.3541	29.6233	30.2092	29.6819	29.2044	29.8244	30.2695	29.5647	29.6634	29.533	29.9662	31.35	32.9446	34.7302	35.789	38.1458	40.1317	41.3258	42.5164	45.3951	46.9026	48.1648	48.9953	53.3551	53.6837	54.8269	57.42	58.2259	58.7675	61.4081	62.5673	63.9414
	40.2111	39.1129	39.6786	39.5799	38.9559	39.0186	38.6378	38.5983	37.8545	38.8354	39.4198	38.1506	37.8932	37.9251	39.065	38.8875	37.8121	38.3415	38.8091	39.2178	39.0032	38.4916	39.1464	39.7077	39.2286	40.453	41.2316	42.0154	44.1362	46.3831	48.8407	49.9939	52.4876	54.8736	55.8187	57.3687	60.1938	61.4556	62.2383	63.3932	67.4763	67.7747	68.645	71.5662	72.3139	72.9435	75.035	76.3049	77.6345
	17.1639	15.6417	15.8975	15.5102	14.5599	14.5315	14.196	13.366	12.8835	13.4684	13.7412	12.4714	11.7245	11.4516	12.1188	11.712	10.1113	10.3685	10.3172	10.9743	9.99636	9.22862	9.66963	9.82681	8.6618	7.67666	7.31031	7.18133	8.51259	9.40852	10.5897	11.0037	12.406	12.9808	13.6882	13.7213	15.3902	16.4919	16.7489	17.1309	20.2504	19.6365	19.6172	21.6605	21.7064	21.2175	22.9115	23.5211	23.9823
	22	20.743	20.8923	20.7276	19.7174	19.695	19.1181	18.4927	17.9391	18.3083	18.6525	17.6594	16.8032	16.8813	17.6991	17.0112	15.5989	15.7269	15.8379	16.268	15.1842	14.5936	15.1945	15.0618	14.1411	13.1774	13.1637	12.8023	14.5523	15.0583	16.521	16.3159	17.997	18.9912	18.9153	19.7516	21.0564	21.8916	22.1465	22.2382	25.7358	24.7508	25.4184	27.5218	27.4655	27.2405	28.8837	29.4685	30.2383
	15.9636	15.166	15.3882	15.1763	14.4142	14.3083	14.0519	13.1662	12.9464	13.5187	13.8443	12.7028	12.2323	12.0224	13.0073	12.1836	11.2104	11.5705	11.7486	12.2273	11.1564	10.8019	11.3579	11.3692	10.5762	10.6436	10.376	10.4919	11.7535	12.4476	13.6494	14.0798	15.6503	16.5351	16.8098	17.6482	19.4423	20.1975	20.4271	20.7044	23.8195	23.2931	23.6399	25.8209	25.6526	25.8714	27.4865	28.0787	28.9516
	34.671	33.7772	34.2543	34.0159	33.4411	33.3419	33.3735	32.9166	32.6171	33.1487	33.8153	32.7801	32.3087	32.3922	33.4038	32.926	31.9727	32.1497	32.506	32.8729	31.8609	31.3758	32.2045	32.2864	31.6043	32.3098	32.387	32.8667	34.2382	36.1849	37.9073	39.2514	41.5123	43.588	44.5243	45.5469	48.3707	49.4147	50.1308	50.698	54.4774	53.9725	54.8559	57.208	57.7867	57.9494	59.7782	60.8734	61.7453
	42.183	41.0059	41.5014	41.4083	40.6218	40.9903	40.4191	39.7458	39.5257	39.9991	40.9373	39.3578	38.8988	39.0854	39.9083	39.6308	38.2149	38.6943	38.5811	39.5288	38.4244	37.9802	38.6608	38.7705	38.0009	38.4814	38.9993	39.406	40.8641	42.3105	44.5379	45.3476	49.6443	50.6442	51.2721	52.5492	54.6235	56.2181	56.7775	57.3013	61.5576	60.9857	61.9902	64.4779	64.6914	64.8983	66.8261	68.1121	68.4779
	20.1189	18.2213	17.6768	17.4311	15.7498	15.4528	14.3813	13.186	12.4628	11.9889	12.2876	10.1627	9.21801	8.53507	9.07525	7.88589	6.34787	6.37319	6.47963	6.58402	5.51244	4.28121	4.4732	4.93538	3.65409	2.50343	3.07753	3.93914	6.36503	8.78272	11.5192	13.4716	16.3384	19.1024	20.3168	22.3515	25.535	27.0843	28.0664	28.7272	33.2958	32.9539	33.3271	36.3775	36.7964	36.8168	38.6535	39.536	39.3193
	16.3839	15.1879	15.3512	14.8412	13.8106	14.0167	13.6044	12.9867	12.656	13.1822	13.8105	12.2914	11.9573	11.6243	12.689	11.9336	11.0554	11.1717	11.4075	12.0327	11.1262	10.1997	10.6898	10.8626	9.88196	10.0297	10.055	10.4684	12.1933	13.9138	15.7235	16.8321	19.32	21.3361	22.4746	23.7951	26.4773	27.7306	28.4636	29.2233	33.3135	33.6614	34.59	36.518	37.5362	37.2654	38.954	40.0835	40.5896
	9.05393	8.14836	8.67551	8.61822	8.05672	8.24788	8.07687	7.44177	7.43807	7.75948	8.5353	7.24655	7.02242	7.25061	8.08885	7.53899	6.57707	6.91069	7.0113	7.64953	6.91105	6.48647	7.13003	7.3084	6.62379	6.7664	6.70158	6.99914	8.68625	9.93534	11.3761	12.3547	14.1301	15.8085	16.2054	17.3104	19.6941	20.9414	21.7134	22.4045	26.3082	26.3733	27.0872	29.6923	30.4607	30.7427	32.9479	34.2761	35.4699
	27.1265	27.8426	27.9072	27.1612	26.5326	26.8076	27.4341	27.0508	27.5812	26.9085	26.493	26.7555	25.935	26.7004	27.3926	26.4054	25.9186	27.3433	26.3911	26.3166	26.256	26.1617	26.4825	25.5398	26.4513	25.622	25.6522	27.0146	28.062	28.844	30.3577	32.502	34.5188	35.7497	37.5729	38.9348	40.9248	43.9795	44.61	45.8087	48.4752	49.4056	50.3932	52.0596	54.7385	55.276	56.2516	57.7228	59.5266
	27.1475	27.207	27.6591	27.0243	26.1581	26.568	26.8833	26.5819	27.0052	26.2597	26.426	25.7483	24.8182	25.5973	26.5125	25.594	24.9609	26.0586	25.8984	25.5643	25.5504	25.1525	25.7873	24.8177	25.262	23.9881	24.3061	25.7439	26.7068	27.4551	28.5014	30.582	32.3583	33.1959	34.72	35.5014	37.8106	40.2763	40.3941	41.2256	43.189	44.2626	45.25	45.4894	48.3158	48.7964	48.979	50.5441	52.0235
	44.2745	44.3101	44.0087	43.2879	41.6791	42.1971	42.1032	41.4429	42.0094	40.9501	40.4175	40.0019	39.6028	39.9285	40.3418	39.3468	38.3233	39.808	38.8934	38.3556	38.1699	37.6038	38.1055	37.0799	37.5242	36.646	37.5114	40.3	42.9041	45.8041	48.8627	53.159	57.2595	60.1745	63.9287	67.6862	72.2893	76.9178	78.8381	81.4095	84.4812	86.2746	88.9441	91.2562	94.9778	96.4718	97.8772	99.7113	100.714
	50.7778	51.2812	51.0689	50.5806	49.7404	49.3488	50.226	49.9718	49.8808	49.5025	49.3504	49.3262	47.9752	48.7561	49.735	48.0883	47.8652	49.3259	48.5954	48.6155	47.7546	47.867	48.9275	47.3036	47.9893	46.777	46.8456	47.6689	48.9959	50.104	51.2443	53.1881	55.8585	56.2415	58.5783	60.4071	62.4203	65.8234	66.4242	68.0156	71.1803	72.6551	74.9039	76.0538	80.0957	81.5558	82.4857	84.3024	86.577
	30.6138	30.4783	30.8405	29.8246	29.203	29.2678	29.7209	29.0411	29.4879	28.7298	28.2705	28.4308	27.516	27.9123	28.9238	27.5126	26.8671	27.8141	27.3467	27.4695	26.8104	26.8257	27.1708	25.9631	26.6565	24.8322	25.2002	26.6602	27.1175	27.8072	29.5751	30.9005	32.9553	33.3656	34.5729	36.0184	38.4232	40.5901	41.215	42.5675	44.8455	45.7767	47.3934	48.5566	52.1746	52.9123	53.3927	55.2677	56.9392
	14.8362	14.8099	14.5587	13.5479	12.803	12.4325	12.6724	11.7631	12.5118	11.9754	10.789	10.7707	9.80791	9.63578	10.2303	9.05302	8.54829	9.09736	8.62053	8.12204	7.62111	7.5378	7.61036	6.74811	7.08912	6.07419	5.95688	7.29064	8.249	9.60718	10.54	12.5612	14.4332	15.8649	17.439	18.7484	21.042	23.6001	25.0604	26.3335	28.6693	29.7756	31.1066	32.4665	35.2997	36.625	37.2741	38.8918	40.8695
	13.9535	14.063	13.5145	12.5478	11.486	11.8116	11.8235	11.0675	11.4871	10.507	9.77479	9.59076	8.50458	8.69823	9.11557	7.74588	7.08559	7.89295	7.25775	6.8831	6.32151	6.35611	6.37457	5.20597	5.6423	4.20874	3.87404	5.24413	6.22201	7.35397	8.68417	10.336	12.5459	13.5574	14.8889	16.3783	18.1654	20.852	21.8931	23.0706	25.8476	26.8219	28.2273	29.1251	32.298	33.0759	33.7313	35.6369	36.8334
	30.7517	30.3478	30.6546	30.4782	29.0906	29.9631	30.1045	29.6201	30.2069	30.0416	29.0429	29.3222	28.7338	29.1079	29.8014	28.6789	28.3069	29.6149	29.0192	28.9764	28.4541	28.2305	28.922	27.7405	28.0454	26.4856	26.3799	27.7794	28.6047	29.6037	30.5095	32.7669	34.5522	35.9523	37.5781	38.7573	40.6952	44.4135	45.1251	46.4929	48.6752	50.0636	51.3647	52.8507	55.7979	56.5457	57.6006	59.758	61.4703
	64.0124	63.951	64.1374	63.2751	62.3427	62.2768	62.2118	61.9015	62.3493	62.3786	61.8683	61.4994	60.3552	60.864	61.2079	59.9114	58.6443	59.9921	58.9518	58.7711	58.2142	58.4074	59.6156	57.6747	58.6305	57.661	58.074	60.2813	62.217	63.6249	65.844	68.5475	71.6623	73.9337	75.1126	77.8212	79.9502	82.9593	83.3494	84.7772	86.6424	87.7061	89.297	89.5522	92.4138	92.0957	92.5346	94.2517	95.8716
	36.5448	36.7367	36.6495	35.7549	35.3455	35.0614	36.0144	35.4328	35.7643	35.4258	34.9714	35.138	34.1536	34.3931	35.1999	34.1981	33.3699	34.1112	33.8136	33.9646	33.6988	33.9467	34.3515	32.7166	33.3966	31.1434	31.5762	32.4398	34.037	34.8016	36.5501	37.9444	40.9156	42.2941	44.4856	46.3402	48.5691	52.0265	53.3427	54.7992	57.5319	58.4417	60.2432	61.9863	65.9322	66.0686	67.4294	69.5929	71.3829
	12.605	12.8554	13.5414	12.613	12.3968	12.1627	12.2334	12.2487	13.0095	11.8284	11.9341	11.7043	11.5412	12.0287	12.2216	11.0946	11.0912	11.898	12.0553	11.3803	12.0498	11.0572	11.3675	10.86	11.5601	11.4619	10.9943	13.5303	13.7697	15.4641	16.4987	18.0011	19.5477	20.3142	21.9926	22.958	24.4882	26.7457	27.4127	28.9211	30.8477	31.2368	32.0661	33.4354	35.747	36.762	37.0009	38.2034	41.119
	14.0733	14.5086	14.78	14.228	13.7862	14.0227	14.3405	14.1821	14.7501	14.2431	13.8696	14.2467	13.2079	14.0169	14.7438	14.1618	13.5108	14.6378	14.179	14.1219	13.8709	13.7631	14.178	13.4442	13.947	14.1132	14.5161	15.7274	16.8476	17.9277	18.9549	20.6754	22.8984	23.8614	25.2467	26.4076	28.5055	31.0467	31.5235	32.0012	34.1625	35.1727	36.7628	37.8154	40.7909	41.692	42.0973	43.6644	45.4742
	16.2762	16.7607	17.0559	16.1228	15.5268	15.8166	16.3739	15.9069	16.5084	15.9993	15.6154	15.9824	15.1163	15.6339	16.311	15.077	14.8901	16.1188	15.5671	15.5028	15.3974	15.5347	15.622	14.9306	15.3171	14.6236	14.4203	15.5753	16.5999	17.3997	18.2584	20.004	21.5617	22.2272	23.5753	24.3167	26.1884	28.1249	28.4248	29.0559	30.5589	30.9324	32.1228	33.2009	35.1451	35.3495	36.0229	37.2118	38.2121
	19.7173	19.6446	20.553	19.3332	19.2147	19.3693	19.8214	19.6108	19.8497	19.3563	18.7414	19.075	18.3345	18.5769	19.4709	18.2685	17.9028	19.0692	18.7227	18.6861	18.5834	18.226	19.0958	17.8982	18.6701	17.8188	18.4339	19.8457	21.4973	23.0624	24.4318	26.4664	28.8657	30.3965	31.8887	33.6624	35.8027	38.2227	38.7473	39.8884	42.2722	43.3682	44.7843	45.6417	48.1902	49.1561	49.3917	50.9709	52.6693
	25.177	25.0363	24.8819	23.8283	22.7282	22.7664	23.0966	22.0831	22.5252	21.5604	20.5984	20.4715	19.2836	19.5192	20.2272	18.6203	17.6744	18.6614	17.7265	17.3478	17.0293	16.7933	17.3414	15.762	16.6905	15.0361	15.0822	16.2354	17.2634	18.4206	19.329	21.3173	23.4359	24.7702	26.3958	28.1456	30.4287	34.1065	35.1195	37.0035	40.2218	41.7969	44.4737	46.2149	49.7597	51.1483	52.0535	54.2733	55.8125
	19.4369	20.0414	20.1213	19.2607	18.4027	19.3866	19.3299	18.6315	19.4831	18.431	18.4261	18.3646	17.385	18.016	18.4531	17.4436	16.892	18.1792	17.2782	17.0642	17.142	17.0723	17.2279	16.0542	16.3737	14.6831	14.4652	15.124	16.0285	16.7426	17.5968	19.2211	20.4279	20.9467	22.8433	23.3281	25.7566	28.4385	29.0622	30.7	32.7876	34.0557	36.0527	37.6262	40.6378	41.9305	42.6233	44.7563	46.4454
	11.0764	10.677	10.639	9.73565	9.23111	9.60485	9.88001	9.44823	9.57878	9.74217	9.14896	9.25404	8.03301	9.0513	9.27494	8.46253	8.09841	8.7685	8.56664	8.11675	8.32884	7.92621	8.27312	7.41404	7.85634	5.65328	5.67139	6.45381	7.34458	8.17507	9.05956	10.8355	12.6447	13.5635	14.8659	16.1234	17.991	20.9141	22.2117	23.9789	26.0778	27.3332	29.2867	31.0208	33.7348	34.5673	35.526	36.6057	39.0897
	47.6628	47.3405	47.3014	46.4545	45.754	46.8047	47.4121	47.1271	47.7961	47.4321	46.9803	46.6186	45.8359	46.6494	48.206	46.8619	45.8779	47.8804	46.9879	47.1927	47.6082	47.0972	48.3612	47.4517	47.9228	48.2543	48.3864	49.7332	51.2985	52.4033	53.7279	56.4851	58.863	61.1043	62.4597	64.2066	67.1951	71.471	72.1281	73.2979	77.164	78.1974	80.8013	83.6781	86.9764	87.2054	88.1264	91.6961	93.1176
	74.5539	74.2184	73.8993	72.2685	70.9672	70.7764	71.2718	70.4387	69.6109	68.2459	67.3699	67.8123	66.2319	67.0665	67.381	65.2943	64.1505	65.2011	64.4303	64.796	67.0193	69.603	72.8949	72.3493	74.5622	67.1415	68.1584	70.1827	73.858	76.623	79.8602	84.2219	88.3343	90.8226	93.3235	94.3094	97.9697	101.538	102.566	104.025	107.074	107.985	109.397	110.064	113.629	112.414	111.427	113.196	113.624
	29.1148	29.863	29.6038	28.9735	28.367	28.5212	29.1653	28.4556	29.3111	29.3512	29.5754	29.4943	28.985	29.6787	30.5295	28.8372	28.4448	30.1105	29.2558	28.8625	28.9675	28.3878	29.36	27.6073	27.9593	26.0908	26.1027	27.3782	27.9793	29.5591	30.3931	32.7201	35.0082	35.9591	37.3349	39.8185	42.0935	44.7107	45.9142	47.4051	49.8475	50.6968	52.5636	53.5865	56.1262	57.5209	57.5256	59.388	60.9334
	21.1973	21.4509	21.9029	20.9578	20.0956	20.5665	21.0655	20.1094	20.9526	20.1403	19.9352	19.9698	19.0923	19.6855	20.2689	19.4867	18.7513	19.9042	19.458	19.0937	19.4131	19.1517	19.5608	18.3391	18.7735	16.8808	17.0168	18.7173	19.2834	20.129	21.0452	23.3129	24.7754	26.603	28.5979	29.6397	32.537	35.9056	37.3316	38.665	41.3638	43.4468	44.4375	46.2751	49.5644	50.1344	51.1384	52.7013	54.6119
	18.2847	18.7346	18.7478	18.454	17.419	17.9201	18.0772	17.6883	17.8428	17.6897	17.4488	17.155	16.6257	17.197	17.7848	16.8158	16.099	17.3442	16.8452	16.9928	16.5988	16.0983	17.343	15.5744	16.3562	14.1878	13.9788	15.2135	15.7784	16.4735	17.2305	18.883	20.4582	21.7356	22.8496	24.3352	26.5479	29.3237	30.2444	31.4071	34.1517	35.4321	36.8342	38.0903	40.9692	41.4492	42.5683	43.7884	45.1124
	17.1263	17.5893	17.5425	17.3911	16.4261	16.8236	17.0796	16.6415	17.5391	17.1888	16.5356	16.4564	15.7713	16.6757	17.0412	15.8321	15.646	16.9202	16.2316	16.1651	16.0346	16.01	17.072	15.6238	16.1723	14.6336	14.3058	15.717	16.2542	17.06	17.5126	19.1365	20.2837	21.4826	22.4682	23.4886	25.707	27.8665	28.7741	29.6726	32.0312	32.52	34.3732	35.2355	38.0407	38.6476	39.1874	41.0373	42.12
	14.9612	15.5834	15.9768	15.3287	14.8016	14.5005	15.4215	14.9721	15.6987	15.2589	15.0236	14.9745	14.069	14.9492	15.4832	14.522	14.0752	15.6056	15.0628	14.7186	14.9119	14.8711	15.4544	14.3029	14.8303	13.6861	13.5878	14.7347	15.9028	16.4547	17.8705	19.7654	21.7312	22.5685	23.9537	25.373	27.7927	30.1977	30.8318	31.8001	34.0224	34.7194	36.3775	37.0474	39.9713	40.264	40.8417	42.7044	43.7332
	21.018	21.3926	21.288	20.6397	19.4024	20.0993	20.4727	19.5366	20.611	19.7461	19.2282	19.4213	18.656	19.1986	19.655	18.6313	17.9752	18.9991	18.7709	18.8034	18.1351	18.4281	19.0642	17.8131	18.3916	17.1269	17.1512	18.0297	19.209	19.7489	20.5384	22.0862	23.627	24.2624	25.4017	26.5054	27.9712	29.9641	30.1819	30.9743	32.737	33.4498	34.1785	34.9889	37.2474	37.4902	38.1806	38.9748	40.3811
	20.3412	20.9106	21.0507	20.6075	19.8188	20.1483	20.8938	20.6843	21.1039	20.2789	20.1662	20.0019	19.6379	20.321	20.6635	19.8119	19.0971	20.1667	20.0741	19.9418	19.9988	19.8839	20.5403	19.396	19.874	18.7656	18.7243	19.479	20.269	21.0626	22.2475	23.6341	25.5779	26.7297	28.0156	29.2175	31.0181	33.8294	34.2147	35.3321	37.5466	38.5351	39.7812	41.0471	43.7792	44.3308	44.7591	46.8366	48.0316
	6.4575	6.59745	6.89427	6.38663	5.75654	6.00186	6.36771	5.60743	6.51497	6.01879	5.53173	5.73381	4.92862	5.59049	6.10997	5.45344	4.95564	5.87125	5.37979	5.44092	5.11197	5.31502	5.65392	4.41551	4.89614	3.54369	3.8238	5.06964	5.66126	6.40637	7.31185	8.78084	10.4037	11.1104	11.7791	13.0994	14.3999	16.457	16.79	17.3426	19.1457	19.4905	20.4328	21.2284	23.5167	23.7942	24.0055	25.3813	26.3769
	24.5749	24.1754	25.1865	23.9915	23.6497	24.4779	24.6527	24.1765	25.0086	24.2952	24.1079	24.5567	23.2154	24.4535	24.1871	23.5139	23.0065	24.4116	24.0491	24.1686	23.6799	24.0681	24.2958	22.4413	23.5013	23.2911	23.5064	24.1167	25.2489	25.6277	26.8185	28.1896	29.8821	30.0759	31.2316	31.7944	33.5267	35.4897	35.6965	35.9771	37.6767	38.5801	39.0742	39.5763	41.8988	42.0801	42.4492	44.457	45.1998
	9.19572	10.0146	9.74339	9.18372	8.89492	8.97354	9.3611	8.95049	9.61382	8.79474	9.03132	9.29392	8.87879	9.33615	9.86391	8.69922	8.59212	9.68137	9.08518	9.25586	9.31609	8.91844	9.5672	8.46065	9.01131	8.4054	8.29091	9.38241	10.1817	11.2543	11.7427	13.3373	15.1041	15.8159	17.3214	18.3484	19.9364	21.9996	22.426	23.0768	24.8697	25.718	26.6163	27.5153	30.0376	30.2329	30.9154	32.5241	33.7149
	20.5958	21.4376	21.1957	20.5413	20.0578	20.5538	20.9862	20.8923	21.2841	20.8305	20.3699	20.3081	19.5923	20.3016	20.9659	19.9176	19.493	20.7105	20.4008	19.9861	20.1572	19.7604	20.4888	19.4968	20.3218	19.8704	19.3833	20.542	22.1015	23.0813	24.2207	25.8863	28.7179	29.7337	31.1186	33.204	35.1247	38.5911	39.5599	40.5905	42.8516	44.4784	45.4545	46.6622	49.5089	50.3716	51.0929	53.2633	54.4249
	19.6216	20.0516	20.1168	19.3439	18.6335	18.8422	19.7439	19.1365	19.7761	19.1959	18.7273	18.6143	18.085	18.5096	19.0069	18.5912	17.7623	19.207	18.1842	18.1856	18.2127	18.2066	18.4541	17.4316	18.0528	16.8502	17.2009	18.5028	19.5482	20.5798	21.6662	23.8667	25.4548	26.4453	28.6133	29.0846	31.1896	33.6223	33.9189	34.632	36.3641	36.8885	38.2256	38.9297	41.8389	42.009	42.3348	43.4544	45.235
	17.1468	17.4028	17.8847	17.1116	16.5456	16.8393	17.5947	17.1339	17.4777	16.9703	16.7758	16.8724	16.3485	17.1565	17.8166	17.0894	16.4083	17.8541	17.5972	17.5021	17.0037	17.0257	17.8143	16.6938	17.3024	17.6213	18.4059	19.6806	21.1842	22.8597	24.3502	26.2162	28.7891	30.0021	31.4878	32.9723	35.5726	38.1101	38.924	40.4768	42.555	43.544	44.9569	46.3946	49.1274	50.3599	50.8533	52.7746	54.2243
	15.7234	15.8306	16.0768	15.2586	14.5446	14.8512	14.9597	14.3736	15.1457	14.5866	14.1334	13.9607	13.1375	14.0435	14.391	13.1282	12.7239	13.724	13.3901	13.127	12.8851	12.3588	12.9675	11.6854	11.9567	9.94227	10.2706	11.1962	11.8432	12.584	13.6809	15.3564	16.8297	18.0903	19.5539	20.8988	22.7625	24.8452	25.9048	26.8845	29.1057	29.7991	30.9884	31.637	35.0216	35.3578	35.9169	37.9261	39.711
	19.2582	19.4645	19.3501	19.3278	18.3495	18.6239	19.2901	18.8579	19.3704	18.8863	18.2544	18.4416	17.8608	18.4779	19.0594	18.0662	17.4031	18.5276	18.0941	17.995	18.0422	17.8313	18.4462	17.2489	17.3919	15.7852	15.6088	16.9812	18.0062	18.4013	19.3713	20.9787	22.6993	23.5689	25.0827	26.005	28.1621	30.4456	30.8622	31.7797	33.999	34.4511	35.6412	36.3345	39.1416	39.418	39.852	41.6889	42.781
Time (s)	0	2	4	6	8	10	12	14	16	18	20	22	24	26	28	30	32	34	36	38	40	42	44	46	48	50	52	54	56	58	60	62	64	66	68	70	72	74	76	78	80	82	84	86	88	90	92	94	96
[truncated: 274 more columns]
