# Supplementary material for: Regulation of store-operated Ca2+ entry by IP3 receptors independent of their ability to release Ca2+
Source: eLife journal article supplement (doi:10.7554/elife.80447), 2023-07-19
Supplement: fig2-figsupp3-data1 [file Figure 2- figure supplement 3 source data 2.pdf › Figure 2- figure supplement 3 source data/Figure 2- figure supplement 3 source data 2.pdf]

## IP<sub>3</sub>R1 Western blot in HEK cells

Low exposure

NS KD NS KD NS KD

IP<sub>3</sub>R1

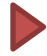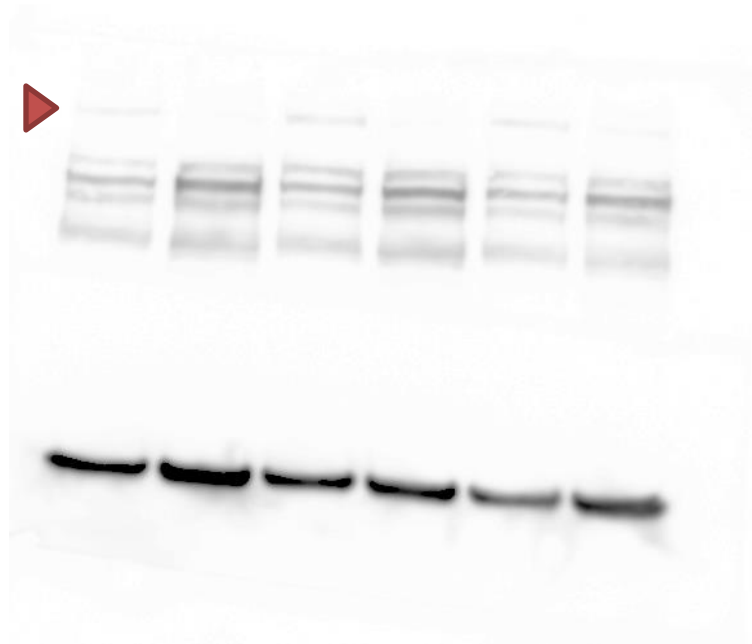

High exposure

NS KD NS KD NS KD

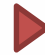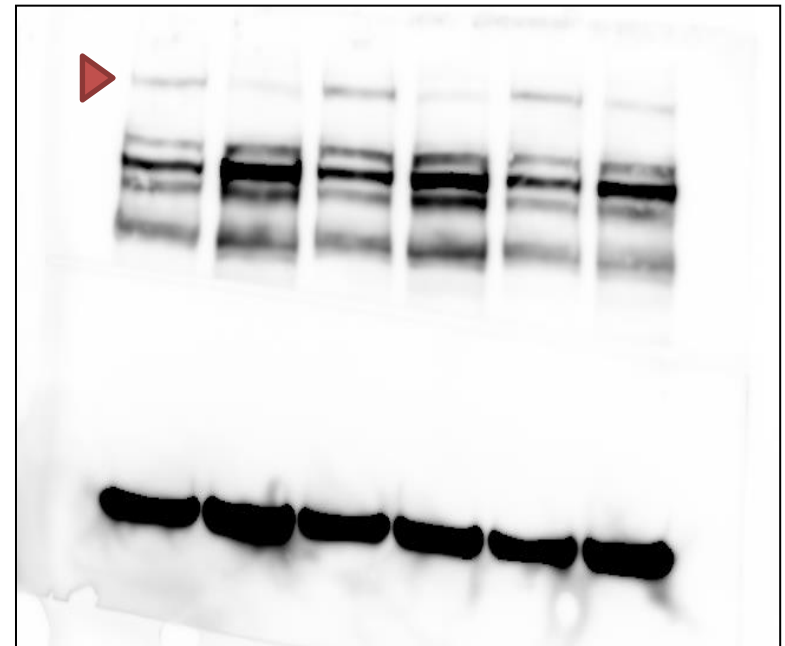

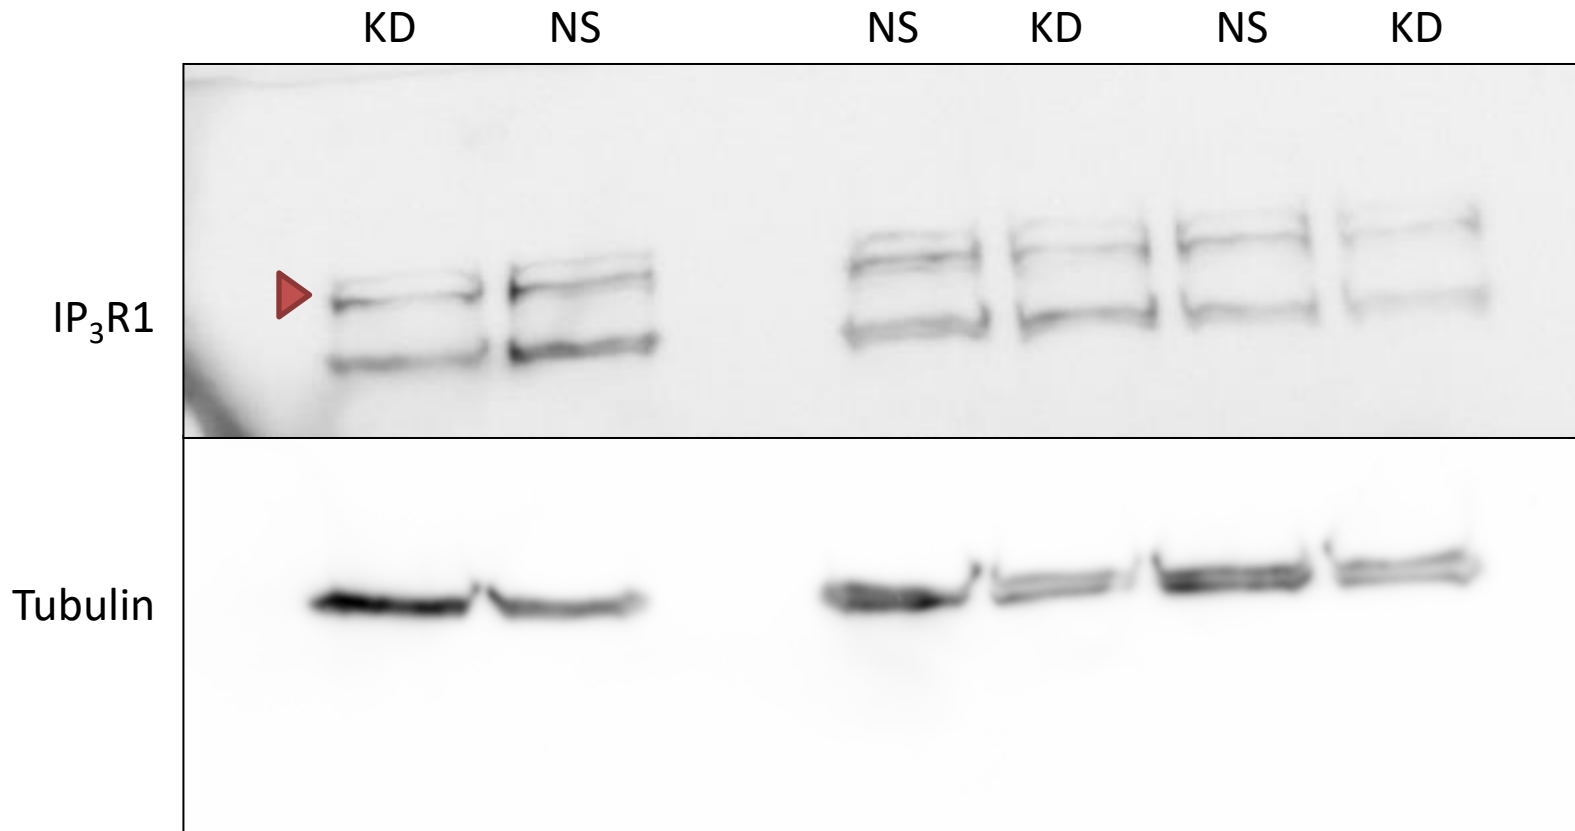

NS- control shRNA (NS shRNA)

KD- IP<sub>3</sub>R1 shRNA

Blots were cut before primary antibody incubation to inhibit cross reactivity.

Every NS and KD indicates individual replicates.
