# Supplementary material for: Regulation of store-operated Ca2+ entry by IP3 receptors independent of their ability to release Ca2+
Source: eLife journal article supplement (doi:10.7554/elife.80447), 2023-07-19
Supplement: fig3-figsupp1-data1 [file Figure 3- figure supplement 1_source data 1.xlsx]

## Sheet: Panel C
IP3R1 shRNA+IP3R1 DA	51.7354	26.4117	25.6535	24.0781	24.6563	25.2232	25.618	25.4823	26.1873	25.3888	25.9424	27.7734	27.5332	29.2173	28.9777	28.5111	27.8966	29.4286	28.5435	28.7498	28.9619	28.9416	28.6139	28.6954	27.9837	29.9164	30.4043	30.6374	31.4768	31.8244	32.425	32.0679	31.7589	32.2986	30.1923	30.474	30.4379	30.5877	29.6884	30.6664	30.6807	29.9312	30.844	30.8248	30.8756	31.708	31.6535	31.3576	31.6393
	60.4101	35.257	35.5742	33.6124	34.0616	35.7422	35.6971	35.2283	36.2566	35.0142	35.5192	37.282	37.2916	39.1234	39.4054	39.0336	38.856	40.4751	39.2774	38.7031	40.0142	40.2949	40.0632	40.1672	39.4974	48.2418	54.1894	56.6081	57.3187	58.266	57.3906	55.1805	53.967	52.5494	49.7465	47.6615	46.75	46.45	44.6327	45.5861	45.9566	44.8581	45.4704	45.5779	45.6653	46.5897	46.2775	45.8577	45.9447
	77.7588	50.0043	50.1106	48.7112	49.4052	50.5675	50.5133	50.2798	50.6861	49.8972	50.3756	52.2378	52.3897	53.233	54.4511	54.0106	53.6687	54.631	54.0898	53.676	54.8362	54.8558	54.4477	54.9967	54.497	55.2819	55.4946	55.3414	55.4033	56.7837	58.5878	58.9862	59.9356	60.1787	58.6065	58.0971	57.7936	57.9925	57.3581	58.6462	59.0237	58.179	58.9856	59.2309	60.5103	60.9183	61.7171	61.3096	60.9659
	77.1988	52.3926	51.8849	51.6192	51.869	52.2401	52.574	52.3372	52.5214	51.7072	51.9456	53.937	53.8956	54.6141	55.9494	55.5678	55.033	56.898	55.9663	55.4327	56.0365	57.4972	55.8934	56.9708	56.483	57.1596	56.212	57.0671	57.2452	58.0153	59.7511	59.8396	61.3455	61.5056	59.838	59.6332	59.3891	59.5102	58.6817	60.2108	61.0933	60.2761	61.1366	61.6836	61.7761	62.4704	63.1722	62.3101	62.2029
	89.1958	60.6562	61.4323	59.8064	60.4281	61.0918	61.6534	61.6144	61.5982	60.9118	60.9391	62.3649	63.2945	63.1849	64.8687	63.9688	64.4253	66.174	66.2024	65.8702	68.6248	71.1459	73.9501	76.4342	77.1849	86.0386	84.9718	85.5685	85.9195	86.6002	87.0379	88.2707	88.1924	87.8786	84.1525	82.5722	81.2539	81.0347	79.3075	79.6574	80.7727	80.3244	81.3104	81.6673	82.6611	83.54	83.8036	81.4799	80.6907
	68.4725	41.1517	40.8916	39.6944	40.1984	40.7901	41.1103	40.7099	41.5438	40.742	40.6534	43.0988	43.0956	44.0222	44.7428	44.6363	44.3833	45.6599	45.173	44.317	45.4124	45.7304	45.4556	45.8277	45.8777	48.001	46.9417	46.462	47.1274	47.5089	48.6702	48.9883	49.7103	50.2974	48.2478	48.0886	48.133	48.4772	47.6149	48.5342	49.2995	48.7118	49.2857	49.4402	50.2135	50.7552	51.1359	51.053	50.5112
	70.6167	44.3655	44.2582	42.7933	43.6402	44.4632	44.7707	44.6728	45.3298	44.5784	44.2142	46.4127	46.4885	46.821	48.4829	47.9922	47.7344	49.0009	48.4937	47.6592	48.7986	49.5585	48.9069	49.1239	48.536	52.9984	50.7186	49.7742	49.4753	50.378	51.1406	51.6423	52.3953	52.8409	51.2448	50.7393	50.6711	51.2009	50.42	51.2911	51.9876	51.5831	52.1526	52.4354	53.1548	53.4738	54.0946	53.832	53.6461
	68.6799	41.8569	41.5345	40.2095	40.9602	41.7706	41.6219	41.8107	42.0568	41.7335	41.6686	44.01	43.5229	45.2017	45.138	44.894	44.446	45.7601	45.0445	44.5591	45.3528	45.7548	45.4803	45.8599	45.606	46.3613	46.0003	46.0949	46.6062	47.5196	48.6392	48.6941	49.4572	49.4155	47.7425	47.2579	47.0866	47.4212	46.813	47.7035	48.1142	47.4149	48.2926	48.5289	48.8457	49.4825	50.0114	49.3455	49.5772
	67.8051	41.1325	41.1134	40.063	40.5643	41.8337	41.6729	41.5614	41.9079	41.1536	41.7611	43.8709	43.7837	44.6934	45.9164	45.2586	45.321	46.4156	46.4319	45.1075	46.2797	46.6026	46.5793	46.1945	45.878	60.0035	55.6967	52.9048	51.1186	50.8525	52.1834	51.6025	51.6473	51.077	49.213	47.8668	48.4426	48.3381	48.1127	49.1135	49.4828	49.047	49.695	49.6245	50.4776	51.111	51.4094	51.4841	50.7047
	67.3224	40.4372	39.9608	38.0552	39.1262	39.7424	40.1787	39.8677	40.645	40.0353	40.3773	42.0939	42.5574	43.2902	44.4168	43.5376	43.4106	44.09	44.0696	43.3235	44.6056	44.7956	44.4534	44.4396	44.4516	68.2281	73.4566	76.8042	71.1416	66.9885	65.5936	62.2698	59.5107	56.8428	52.6445	49.8621	48.6688	47.9245	47.2713	47.4057	47.8079	46.8679	47.8614	48.2968	48.6775	49.2125	49.3383	48.7186	48.845
	69.0893	42.3751	42.3716	40.9555	41.8808	42.6977	42.918	42.2167	42.9975	41.98	42.5239	44.4154	44.7149	44.7484	46.875	45.896	45.8902	47.6627	46.567	45.9939	46.7863	47.1867	47.086	47.39	46.5351	47.6569	47.2201	47.4358	47.3282	48.4497	50.3369	50.4466	51.6458	51.9779	49.9385	49.6466	49.959	50.5786	49.7293	50.9992	51.1485	51.0063	51.7464	52.0568	53.0047	53.2685	53.5085	53.4123	53.1379
	58.0072	31.6391	30.8964	29.5571	30.3593	30.8451	31.031	30.6586	31.3813	31.1153	31.173	33.4336	33.1496	35.409	35.0065	34.1653	33.8687	35.3504	34.7572	34.7038	35.3391	35.4496	34.7407	35.2721	34.9855	35.264	34.5885	35.1992	34.8882	35.3489	36.6809	36.769	37.1504	37.3965	36.3933	35.9953	35.7921	36.7151	35.8499	36.8122	36.8985	36.1227	36.982	37.0527	37.8947	38.2258	38.2318	38.1333	38.3103
	38.9138	39.5615	38.1292	37.6989	38.2093	37.2984	38.1786	38.0615	38.02	39.446	39.2165	40.1727	39.1488	39.8323	39.898	39.5537	40.7628	40.7941	42.0405	41.5361	42.2207	42.4523	42.4259	41.9709	41.8162	48.2518	45.4798	45.6232	45.7193	45.9549	45.9543	46.4125	47.3226	47.1224	47.7577	48.5072	47.1938	47.6034	47.4369	46.1788	46.428	46.6656	45.8278	47.2808	47.9359	46.9104	46.8558	47.0372	46.3798
	26.3668	26.764	25.0976	24.9477	25.1992	24.239	25.0016	25.2299	25.3149	26.0835	26.1012	26.79	26.8835	27.0696	26.8902	26.8925	28.0233	28.1401	29.3975	28.6822	29.7175	29.8035	30.2531	29.5846	29.5945	60.1785	62.7435	65.0843	64.8571	63.542	61.1615	58.8545	57.4474	54.3326	52.053	50.9403	48.2347	46.6296	44.8849	42.65	41.3742	40.5483	39.4425	39.8088	39.837	38.9468	38.7676	38.0016	36.9397
	32.8864	34.2242	31.6165	31.5884	31.2376	30.7396	31.8767	31.3268	32.2199	33.2819	33.283	34.3117	33.8738	34.127	33.8464	34.3862	35.2554	35.3118	35.8378	35.9513	36.9234	37.2073	36.4301	36.098	36.0738	40.5878	38.506	38.7141	40.1515	40.5185	41.0403	40.3796	40.8859	40.4783	40.6367	40.9672	39.9108	40.1004	39.4497	38.3122	37.4677	37.9047	37.961	38.7731	38.6563	38.8309	38.9647	37.9447	37.2942
	30.2164	29.9505	28.5172	28.3525	28.8642	28.2424	28.059	27.5793	28.4343	29.8837	29.494	29.9917	29.8458	29.9174	29.7456	30.8142	31.2	31.4567	32.6681	32.0375	32.2901	32.7586	33.4586	33.1745	32.711	33.2841	30.0386	31.5462	32.4929	32.9564	33.3928	32.7871	34.3081	34.0727	34.3932	35.5954	34.711	34.4658	34.7904	33.5819	33.6404	33.2534	33.9132	34.2114	34.4464	34.8169	34.0472	33.5127	33.7158
	32.4411	33.0462	31.3596	31.3468	31.3591	30.2885	30.545	30.8293	30.884	31.6137	31.554	33.1396	32.7937	33.2743	32.8527	32.916	33.6464	34.3657	34.3695	34.74	35.015	35.0125	34.8102	34.9024	34.5148	51.2537	46.296	44.1362	42.9284	40.9324	41.2467	41.0689	43.7454	43.933	43.2015	43.3353	42.0274	41.2867	40.1201	38.9247	38.2378	38.116	37.7236	39.796	38.784	38.1247	38.7326	37.8253	37.1423
	33.613	34.0157	32.5704	31.9464	32.9954	31.7697	32.2102	32.2554	32.8691	34.6146	33.9613	35.0268	35.3856	35.4666	35.1945	35.347	36.1709	36.2286	36.8595	36.7755	36.7886	37.5044	37.6794	37.339	37.0158	37.9043	34.7286	36.6338	36.4386	37.7746	38.0354	38.7069	39.1631	39.4542	40.4118	40.6643	40.5181	40.402	40.4588	38.666	38.9404	39.1518	39.3991	39.8515	40.3752	39.9618	39.9068	39.4431	38.5451
	33.7181	33.8119	32.1447	31.6792	32.0233	30.9542	31.6827	31.2388	31.7988	32.888	32.5956	33.99	33.1566	33.7429	33.7495	34.0807	34.6405	34.6293	35.3543	35.5888	36.1876	36.5552	36.388	35.7683	35.6673	60.5761	53.6355	50.521	47.9133	46.2658	45.7243	47.0533	48.8317	48.4053	48.2349	47.578	45.5436	44.268	43.1391	41.6346	41.3311	41.399	40.6538	41.2469	41.8353	41.5731	40.8673	40.1142	39.5597
	43.284	44.4712	42.7027	43.2583	43.1255	42.3624	42.8363	43.0237	43.2539	44.5992	45.1823	45.65	46.1541	45.688	46.141	46.5064	47.3217	47.2653	48.3631	48.2368	49.0499	49.1085	49.5035	48.993	48.7152	56.1162	55.1429	60.7037	63.3341	65.0518	72.2335	77.1048	82.5059	82.3208	83.5562	81.4766	76.8742	75.3173	71.4367	65.9027	64.1467	63.6451	59.9459	59.9665	59.0898	57.989	56.643	55.3386	54.951
	71.8534	72.9589	71.7441	71.9787	72.4588	72.1154	72.2706	73.1285	73.0701	74.1263	74.6352	75.0073	75.0091	75.2974	76.0945	75.4961	76.7513	77.2411	78.1502	77.7462	79.2089	78.8199	80.4368	79.6734	79.437	79.817	76.662	78.401	78.4983	79.4509	79.9482	80.2465	83.0588	82.3246	83.5189	83.8005	83.9506	84.4305	84.665	82.9198	82.7271	83.8238	83.144	83.9528	84.6054	84.4888	83.4011	83.3926	82.8958
	52.6546	53.2749	51.3056	51.867	51.9427	50.9235	51.6266	51.2437	51.88	53.3758	53.0217	54.0328	53.7077	53.5686	53.4255	53.9563	54.8047	55.2283	55.4818	55.6003	55.8838	56.5323	56.7268	56.1543	56.5664	109.618	88	74.1377	67.7037	63.7203	61.8886	60.3688	62.4251	62.8036	65.4053	66.4047	65.9444	64.5773	65.0715	63.4312	62.6731	62.6746	61.5806	62.2989	62.3094	61.2587	60.8181	59.9634	59.6017
	36.803	37.2546	35.4904	35.6591	35.7283	34.5059	35.3577	35.0215	35.5217	36.7088	36.621	37.2532	36.9819	36.9493	36.987	37.3787	38.1143	38.3839	38.8723	38.8017	39.4117	39.6919	39.255	39.025	39.4026	40.2133	37.5369	38.3166	39.17	39.4636	40.2581	40.5759	41.5839	40.9256	41.4706	41.9393	41.5759	41.518	41.4984	40.2695	39.9947	40.5336	40.1695	41.0912	41.4366	41.0497	40.9119	40.8942	39.9084
	38.8705	39.5575	38.2723	37.4413	38.3827	36.9929	38.183	38.3912	38.5809	39.6056	39.559	39.7317	40.9927	40.2212	39.7502	40.4818	41.2806	41.8881	42.1433	41.2927	42.1497	42.8565	43.4049	42.6806	42.682	43.4873	39.6658	41.2455	41.6992	42.9276	43.7649	43.4165	44.8278	44.1838	45.2851	45.7608	44.3327	44.9834	44.8127	43.4848	43.9273	44.2694	43.9189	45.087	45.3573	45.0554	45.0168	44.4029	43.7763
	56.0726	56.8684	55.1991	54.9397	55.9079	54.6651	56.0674	55.7678	56.1862	57.8365	58.1914	59.6246	59.3187	59.5158	59.5346	59.7581	61.2957	61.2949	61.5566	62.5873	62.876	63.1059	64.2585	63.3871	63.7295	65.2052	62.1855	63.5843	64.5092	65.1697	66.4035	66.9736	68.4571	68.4867	69.4639	70.4652	69.8501	70.915	70.335	69.5577	69.832	70.9093	70.7375	72.0451	72.3473	72.4311	72.1828	72.1633	71.7077
	39.9625	40.1279	38.3903	38.4454	39.1243	38.2819	38.7322	38.8022	39.5962	40.7657	40.824	41.6947	41.4999	41.9137	41.8368	42.4558	43.3905	43.6461	44.2696	43.7965	44.9641	45.9835	45.8788	45.8329	45.4974	47.2096	45.1195	46.0715	47.1863	49.1008	50.0983	51.115	52.3636	52.3874	53.7601	53.8246	54.1084	53.8315	53.486	52.2294	51.8105	52.2757	52.0137	52.8034	52.9928	52.9943	51.871	51.3839	51.0613
	52.2389	52.5801	50.6482	50.1986	51.1568	49.5803	49.6393	49.2841	50.3158	51.7627	51.4064	51.6341	51.774	51.2364	50.7811	51.3577	51.8331	51.9048	52.3996	52.0259	53.2901	53.1662	53.3968	52.9455	53.4116	55.0802	51.4838	53.3777	53.433	54.5533	54.9695	55.7468	55.9906	55.8559	56.4097	56.086	54.5398	54.0206	54.6853	52.4766	52.4629	51.9766	51.4973	52.8417	52.2721	51.7457	51.8336	50.7871	50.4025
	42.3819	42.6532	41.2151	41.2745	41.6655	40.4341	41.4978	41.0975	41.1532	41.4141	41.6194	41.8638	40.9602	41.0691	40.5046	40.792	41.6491	41.1458	41.3565	41.5423	42.5165	42.4197	42.4131	42.1279	40.694	43.0823	40.7715	41.6327	42.9594	45.2813	45.231	45.8406	46.6427	46.4534	47.6236	46.8733	46.0229	45.8798	45.4163	43.5134	43.7419	43.9461	43.1505	43.9794	44.0964	43.8994	43.7892	42.3068	42.0131
	32.4071	33.2278	31.3566	31.5313	31.6218	30.7833	31.6462	31.657	31.5333	32.7762	32.4511	32.682	32.8553	32.9569	33.1562	33.1314	33.6462	34.1262	34.1859	34.4081	34.4837	34.5732	34.7328	34.5522	34.4937	35.3645	32.8466	33.5252	34.2396	35.2006	35.8304	36.1992	37.0992	36.679	37.3514	37.6125	36.6212	37.0377	36.8702	35.6707	35.6201	35.8821	35.6598	36.6428	36.8211	36.6142	35.9345	35.9833	35.2148
	59.2508	60.5283	58.5835	58.1487	58.6444	57.1134	57.9868	57.5543	58.0313	58.4322	58.1268	59.7592	59.157	59.1028	59.0338	59.5257	60.1067	60.3604	61.2321	60.4672	61.0992	61.4176	61.6222	61.4032	60.4747	72.8228	70.4217	68.745	66.3588	65.0801	63.47	62.5976	64.4383	63.952	63.8951	64.2679	63.5695	62.8046	63.2176	61.4884	61.2033	61.6888	61.4832	62.9744	63.3833	62.8777	62.6923	62.0655	61.4787
	49.8905	50.4199	48.9296	49.0123	49.3182	47.785	48.8843	49.1083	49.8331	51.1501	51.1871	51.7562	51.6682	52.36	52.3229	52.7888	53.6017	54.4982	54.9607	54.8392	55.5166	55.8794	55.8385	56.1103	56.3672	273.56	261.218	179.853	129.707	103.153	88.689	81.4466	78.3778	75.3568	74.3012	73.6075	71.1473	70.2443	70.1499	68.0718	68.3938	68.4782	67.9792	69.0777	68.8643	68.9309	68.4067	68.1502	67.9675
	42.3572	42.0147	40.985	40.9154	40.774	40.3755	41.4331	40.7293	41.6719	42.9086	42.6172	43.2038	43.1912	43.1731	43.5122	43.8679	44.7667	44.8123	45.6823	45.3496	46.1356	46.3782	46.861	46.3841	46.0389	55.0188	50.7151	51.2835	50.3525	50.3452	50.4524	50.5184	51.0893	50.7495	50.4791	51.8385	50.4601	50.3486	51.0158	49.0816	48.8969	49.0303	48.7885	49.4878	49.4185	49.7397	49.0658	49.2791	48.2333
	37.7147	37.799	36.6818	35.8557	36.271	35.6513	35.8571	35.9902	36.3785	37.8355	37.3837	38.3738	38.6466	39.1342	37.5621	38.6493	39.7943	39.8596	40.2722	40.0105	41.3528	41.2979	41.5647	40.9785	40.9158	44.3262	40.999	43.203	43.9346	44.8979	45.8186	46.4503	48.5209	48.6068	48.9516	48.641	48.8004	47.7802	47.1512	45.6097	45.317	45.8573	44.3893	45.2285	45.5267	45.2409	44.9384	44.4867	43.5287
	44.7485	45.8347	43.762	44.0317	43.8569	42.8258	43.8504	43.9072	44.1955	45.3404	45.5246	46.4697	45.796	46.4165	45.7543	46.6406	46.6798	47.0658	48.1206	47.9634	48.5366	49.1555	48.5689	48.8468	49.2166	64.8193	60.5394	59.1469	56.6227	55.7029	54.6103	53.9262	55.1044	53.8676	54.7317	54.7227	53.4714	53.4471	53.3425	52.0595	51.7394	51.8089	51.5804	53.0811	52.656	53.3556	52.4924	51.9813	51.0569
	38.9121	38.9608	37.3007	37.6194	37.884	37.0841	37.3494	37.3301	37.8645	39.3579	39.032	39.8039	40.2061	40.4283	40.0786	40.9094	41.3489	41.4179	43.0136	42.6356	43.054	43.1117	43.2641	43.1526	42.8139	46.2823	46.1967	47.2365	48.5427	49.6728	49.2768	49.5329	50.6074	49.9283	50.5168	50.7948	49.4648	49.7528	49.0274	46.9402	46.813	46.8896	46.4888	47.3993	47.5763	47.4542	46.7675	46.7577	45.9818
	44.6066	44.4286	42.7856	42.8587	42.8567	41.5641	42.9917	42.7686	43.0123	44.4866	44.5119	45.0485	44.6957	44.7567	44.3819	45.3375	46.2487	45.7687	47.1423	46.9495	47.3769	47.926	47.6042	48.1496	47.9975	61.0275	66.3049	60.0739	53.5645	50.8523	49.0913	48.3347	49.4957	48.9887	49.1022	49.5057	48.729	48.8885	49.2289	48.0196	47.4975	48.6281	48.1195	49.3845	49.3458	48.5571	48.157	48.3441	47.5157
	54.8972	55.6051	53.483	53.772	53.9722	52.7181	52.773	52.6992	54.0645	54.2265	54.826	55.5425	55.5888	54.8735	55.6367	55.5077	56.9784	56.5855	57.4374	57.7661	58.1561	59.1169	58.8185	59.2358	59.4241	60.8099	58.4652	60.8068	62.3249	62.9449	64.0441	64.0228	64.7537	64.2986	64.5373	64.6291	63.6807	63.3323	63.7097	61.7784	61.9725	62.9085	63.1045	64.2743	64.932	65.0931	65.49	65.9849	65.6908
	63.6363	64.4865	63.1682	63.0979	63.991	62.6925	63.5353	63.1806	64.153	65.1745	64.9467	64.896	64.9465	65.6646	65.8445	66.122	66.678	68.2611	68.7878	69.0783	69.4411	69.6451	70.2551	70.2574	70.6521	73.4992	70.7081	74.1242	74.2498	78.36	78.8108	80.935	81.2629	81.1349	81.0892	85.4551	82.2549	82.7192	81.5651	78.2701	76.8465	76.8702	76.5146	77.4914	76.3778	76.4975	75.513	74.5345	73.6174
	59.8875	59.6991	57.9082	57.623	57.8657	56.7029	57.4642	56.9746	57.6875	59.2289	58.89	59.7915	59.6302	59.8077	59.4706	60.1256	60.8956	60.9118	61.5551	61.6146	62.2413	62.8461	63.0151	61.9577	62.1107	64.3399	60.1417	61.6148	62.2401	62.222	63.1894	63.218	64.3717	64.3336	65.0992	65.5892	64.408	64.1725	64.5325	62.9646	62.6765	63.2729	63.0034	64.0518	64.5026	64.4171	63.773	63.759	62.7743
IP3R1 shRNA+IP3R1 RQ/KQ	37.8724	38.1269	38.3218	38.5564	38.6937	39.5283	39.149	40.6757	40.9045	41.4419	41.5176	42.1642	42.5901	42.5853	42.6965	43.063	43.481	43.9161	44.1553	44.7486	45.894	47.0879	48.0161	49.5217	50.3369	55.0396	55.9287	56.3321	57.4468	57.4988	59.0577	58.7601	59.0333	58.9124	59.8762	60.4729	60.0979	59.268	59.1948	59.4792	59.0593	59.7895	59.0803	58.9102	58.7902	58.8001	58.4354	58.0819	56.9192
	29.4903	30.1911	29.7756	30.7687	30.6949	31.6439	31.3998	32.4617	32.8863	33.1333	33.3571	34.0119	33.8818	34.0225	34.3944	34.285	34.6827	35.0741	35.2255	35.9879	37.1168	37.8176	38.4381	40.0134	40.743	46.7084	58.3471	59.8432	62.8981	69.3286	77.7625	83.0927	87.2771	89.9401	91.6994	93.4351	92.4274	90.8828	88.216	86.2294	82.6312	79.9373	76.4669	72.8416	70.0251	67.4325	64.7833	62.0415	59.465
	33.5699	33.7466	33.1765	34.0633	33.724	34.9673	35.1891	35.9613	36.2398	36.2265	36.8407	37.258	37.436	37.7168	37.8287	37.9441	38.1497	38.9534	39.2752	40.0636	40.7764	41.8836	42.7286	44.4908	44.5355	49.8852	53.5763	55.1126	59.3233	65.3059	73.339	79.0977	82.947	85.1349	86.7602	87.6401	87.1892	85.7336	83.8452	82.7304	79.6681	78.3063	75.829	72.3368	71.1086	68.7317	66.2959	64.1587	62.1826
	44.7462	45.6916	45.2976	45.8578	45.9849	47.3271	46.8805	47.9628	48.6134	48.4434	49.4303	49.7794	49.5895	50.6464	50.1364	50.9972	50.5721	51.979	51.8038	53.1153	53.6481	55.2149	56.5526	58.5574	58.7165	63.7164	64.8207	65.1055	66.1011	66.0072	67.663	67.8286	67.8269	68.6801	68.4904	69.8352	69.2847	68.4487	68.7549	69.068	68.5992	69.0808	69.2258	68.2781	68.3488	68.0121	67.3755	66.6654	66.6167
	32.1211	32.6733	32.4785	32.3922	32.965	34.0993	33.494	34.2039	35.4946	35.565	35.9292	36.4448	36.7172	36.8142	36.4127	37.2864	36.9682	38.0866	38.17	38.7249	39.7949	40.4289	41.0523	42.9737	43.3191	48.2231	48.4659	48.8948	49.8914	49.8309	51.3468	50.7235	51.1202	50.9105	51.617	51.9757	52.3652	51.1626	51.1666	51.5433	51.1998	51.7133	52.0121	50.9034	51.3054	50.9031	50.477	50.0828	49.5176
	18.3882	18.6528	19.1751	18.9567	18.52	17.5193	16.7883	15.8842	15.6237	17.7589	18.8685	18.3978	17.8706	17.6029	15.9672	15.9503	16.0975	15.5845	15.6276	15.2693	15.6755	15.9089	16.4358	17.5208	16.2958	117.855	146.217	146.553	145.339	140.911	135.697	126.921	124.473	119.268	114.94	109.928	104.618	100.338	96.9219	91.7763	86.9542	81.8743	77.3548	73.3597	68.3565	63.4807	58.8703	55.0604	51.0995
	54.2923	54.2416	55.1585	55.2813	54.4371	52.9223	52.8499	50.5311	49.8993	52.9337	53.9992	54.1048	52.9146	52.4135	50.2725	50.5647	50.7068	50.0643	49.5198	49.987	49.9157	50.3764	51.5091	52.5217	51.0356	505.634	492.943	481.094	451.616	425.728	402.828	372.288	356.107	336.525	319.403	308.102	286.347	273.078	262.732	249.56	241.418	228.745	218.359	207.188	196.825	183.724	175.972	165.514	156.876
	35.2827	36.0385	37.3388	37.0477	36.6544	34.2605	34.6057	32.8658	32.5399	35.1747	35.9987	36.3929	35.5263	34.7315	33.726	32.9518	32.8474	32.7157	32.3366	32.4925	32.5222	33.4994	33.7295	34.9904	34.2286	341.953	330.336	317.178	293.29	277.058	260.605	240.685	230.9	219.16	209.563	201.099	192.538	187.963	179.325	174.228	171.216	163.099	156.889	149.702	144.304	137.464	133.067	125.698	121.302
	33.9506	33.7754	35.9566	34.2645	34.8241	33.2294	32.7573	30.7602	31.2774	32.8133	34.105	34.0806	33.5981	32.7579	31.9545	30.7707	30.7106	31.3352	30.7544	29.6577	31.1852	31.4482	32.0412	32.8418	31.6491	103.176	124.449	138.605	141.381	147.946	146.807	138.808	134.102	127.167	118.637	116.636	109.708	104.915	99.8041	97.9359	95.6748	90.7764	86.7233	80.9801	76.4311	72.3095	68.5689	63.6519	61.1159
	39.3094	40.1244	40.5254	40.3469	39.9865	38.6717	37.3837	36.59	36.5204	38.5899	40.0078	39.8189	38.4911	38.5771	36.2402	36.4007	36.2964	36.6585	36.394	36.2854	35.8781	36.3962	37.1843	38.6	37.8403	255.818	263.243	262.044	252.96	240.122	229.514	216.319	209.12	196.826	188.94	180.078	172.144	164.064	157.784	151.656	149.054	141.177	137.025	129.108	121.982	116.359	108.4	101.908	95.9711
	48.038	48.3762	48.5882	47.8438	47.8669	45.6394	45.7781	43.7273	44.5211	45.8365	47.1767	47.9372	46.4699	45.9541	44.0583	43.2371	44.3868	43.5057	42.8265	43.1455	43.582	44.1024	44.2308	45.7809	44.4284	376.876	384.015	374.678	354.146	329.594	308.749	281.373	273.394	260.639	247.327	239.159	226.039	215.967	207.208	198.937	191.493	183.422	174.576	166.431	159.23	150.79	145.169	138.967	132.702
	26.779	23.9256	22.1813	20.8585	20.2159	20.5424	19.9393	19.1768	18.1293	17.6905	15.956	15.0524	14.0763	13.6316	13.6391	14.8551	15.8713	16.0766	16.8447	16.6373	17.2477	16.0136	14.7243	13.2002	12.5401	13.991	14.6852	15.3952	16.6052	16.9786	16.1399	16.956	17.4465	14.2745	14.1452	14.4221	15.0324	16.7742	17.2075	19.25	19.2679	18.9613	17.7629	16.4888	15.9505	16.3446	16.7758	17.9025	19.3696
	23.9872	22.6561	22.9976	22.7129	23.2753	24.6677	24.8282	25.0875	24.72	24.8795	23.3658	23.5279	22.3307	22.4749	22.4863	23.5496	24.7959	25.5292	25.9802	25.9949	26.332	25.4511	24.0778	23.1253	22.541	24.0434	24.7578	25.9409	26.8311	26.8086	25.9887	26.8579	27.224	24.4384	24.653	25.3552	25.6122	28.2907	29.8629	33.3298	34.7425	35.0881	34.4592	33.7333	33.2943	33.3404	34.3412	34.9467	36.2024
	23.7473	23.2979	23.264	23.6646	24.3151	25.3873	25.7554	26.0458	25.8029	25.3215	24.368	23.4835	22.4163	22.7032	22.6019	23.6121	24.7738	25.8944	26.0743	26.3503	26.3537	25.1449	23.8764	22.4356	21.8755	22.9846	23.7062	24.7463	25.6129	25.4383	25.1166	24.8602	26.4492	54.7314	294.144	237.641	185.628	153.306	173.153	339.301	387.529	328.885	271.092	256.568	274.127	296.363	297.137	274.663	250.613
	32.6906	32.0419	32.5287	32.827	33.7266	34.936	35.2096	35.2423	35.3546	34.7053	33.6478	33.4139	32.254	32.4928	32.9043	33.5677	34.6167	35.9155	35.7578	36.548	36.2485	34.8948	34.0425	32.5794	31.126	33.4847	34.149	35.6769	36.5527	36.1696	35.5932	35.9699	37.0711	34.1025	34.9397	35.4432	36.7586	38.7052	39.4784	42.4541	43.2851	45.1043	44.1622	48.6613	50.7333	57.5683	67.4948	78.654	84.6365
	34.044	32.6975	33.1491	32.7945	33.7593	34.4819	34.5657	35.1043	34.2556	33.389	32.8568	31.9808	31.0455	30.5298	31.1482	31.98	32.8918	33.4992	34.2608	33.9487	33.6091	32.513	31.7535	30.2458	30.0132	30.175	30.747	32.1555	32.725	32.8994	31.86	32.7914	33.6463	30.9867	36.7014	37.0192	37.9344	38.9877	40.6047	46.5522	48.1856	47.8129	46.4479	46.3439	46.7554	49.2812	50.5528	55.6391	58.4317
	25.5714	24.8763	24.7181	25.1171	26.7548	27.6705	28.3053	28.9831	28.2699	27.6678	26.9489	26.7584	25.6509	25.9033	25.8322	26.4172	27.4728	28.6325	29.0674	29.0085	28.8195	27.2576	25.8997	25.2473	23.5345	24.9828	25.6621	27.0093	27.8848	27.8397	27.0887	27.2486	28.5935	25.0968	26.4175	26.847	27.5786	28.5631	30.7839	34.629	35.9506	37.7692	36.7842	37.085	37.9424	38.6337	41.1658	44.4127	47.9457
	51.9605	50.4353	49.3147	48.1141	48.321	49.3153	49.3108	49.1741	48.7448	47.6682	46.5615	45.5581	44.3153	44.5928	43.6031	44.9153	45.5294	46.6954	47.5331	46.9035	46.537	45.8123	44.3559	42.8581	41.7783	44.5509	43.7717	46.079	46.9686	47.306	46.3775	46.4012	48.4297	44.609	45.4396	45.6544	46.5204	48.2246	49.5817	52.8481	53.2484	53.667	53.7411	54.9527	57.6686	64.5072	91.0131	198.446	286.442
	79.3669	77.486	77.2075	77.5287	77.4629	79.4559	77.8649	77.7272	76.8473	76.6292	75.3911	74.4962	73.9368	74.1081	74.0234	75.2476	75.9775	77.8839	78.0405	77.5842	77.6971	76.1815	74.5317	72.769	71.4861	73.4855	74.2263	76.8351	77.1668	77.7465	76.7715	77.6663	79.0724	74.7746	76.0963	77.574	77.4699	78.8298	79.655	84.7588	85.6228	85.1334	84.7874	86.3089	88.373	93.148	127.65	263.579	309.905
	52.1107	51.1234	51.1554	52.2897	53.3599	54.4012	54.7589	54.8881	54.4764	53.8895	53.5368	52.8221	51.8166	52.2933	52.1365	53.3372	54.5846	56.4482	56.7236	56.9807	57.4517	55.6001	54.412	53.0793	52.4495	54.0518	55.7678	57.636	57.8055	58.6492	57.7072	58.4241	59.0215	56.4662	56.2818	57.1254	57.6537	58.9678	60.9256	64.0968	65.0582	64.8992	63.435	62.8939	62.5926	62.624	64.1095	68.3326	70.8602
	14.4729	13.9845	14.404	14.0268	15.0605	16.2125	16.647	17.0949	17.0435	16.2437	15.8852	14.7114	13.8504	14.1901	14.5495	15.0117	15.9915	17.2943	17.6883	17.6106	17.6003	17.24	16.011	14.7136	14.1374	15.4552	15.4052	16.9284	17.291	17.3321	16.5785	16.9613	17.5944	14.4931	15.2374	15.3569	16.7304	19.546	23.5812	29.6234	32.1508	35.6768	35.0304	36.2958	37.5355	38.9797	42.7545	45.2366	49.3472
	7.78863	7.79287	8.02603	8.77777	9.20859	10.717	11.1714	11.1774	10.8393	10.5704	9.99294	9.37895	8.3054	8.66478	9.01397	9.10248	10.3644	12.2169	12.2267	12.2268	12.1978	11.3144	10.3154	9.26244	8.76225	9.89733	10.8553	11.8687	12.5395	12.8614	11.6581	11.9323	13.2092	10.3039	10.2697	10.469	11.489	14.4758	19.9487	27.9099	32.4119	35.8798	36.0025	36.4512	37.6927	38.2922	39.3813	40.9344	41.9443
	31.0886	30.3964	31.0688	33.0758	34.3072	36.4959	36.2969	36.3217	36.2749	36.1392	34.8237	33.6294	33.964	33.4401	33.918	35.2957	36.95	37.8578	37.9223	38.5658	38.6166	38.4543	36.3157	35.2407	34.5606	37.1754	37.9147	39.0065	40.1348	41.0602	39.8375	40.8697	41.0532	37.4967	38.5251	38.6079	39.6861	41.336	44.0823	46.9632	48.7148	49.5928	49.4305	47.9529	48.5948	47.2596	48.9466	51.0385	52.0451
	30.4312	29.7506	30.4924	29.3303	30.4759	31.7903	32.1098	33.0113	31.6926	31.3582	30.8394	29.6421	28.9833	28.3783	28.7968	29.5828	30.3542	32.0454	32.8269	33.1251	32.7956	31.7059	30.5397	29.0946	27.6223	28.4997	29.8491	31.1609	32.0583	31.8228	31.2611	31.5662	32.2509	34.2272	80.9331	71.9512	65.5587	63.7786	69.5007	96.8521	100.08	92.0266	84.7979	85.2852	86.2152	91.2886	94.9392	94.592	97.7621
	20.5807	18.5905	17.3382	16.9413	17.0302	17.4113	18.2185	18.7741	19.843	20.8164	20.5424	20.3764	18.8316	18.72	17.4095	17.1042	17.729	18.4358	19.9429	20.0348	21.0373	20.0867	19.7128	18.4067	17.3216	47.228	65.6398	81.968	91.25	94.2658	94.6414	90.3583	85.2018	80.1963	73.0853	67.1735	61.5825	58.1421	54.9376	52.0003	48.8817	46.0297	42.7862	39.2098	35.0924	32.0287	29.0402	26.9672	26.085
	26.9289	25.1076	23.793	23.2466	23.691	24.3307	24.9894	25.948	26.323	27.0291	26.7089	25.9082	25.358	24.957	23.4011	23.4573	23.699	24.5422	26.0087	26.7295	27.7205	26.4918	26.2844	25.2359	23.6509	144.592	151.242	153.417	150.487	146.639	141.905	132.85	124.578	118.012	108.851	101.957	95.6022	90.5151	85.9779	81.9073	77.1504	72.2584	66.4741	61.7197	56.0867	49.347	45.0522	41.9027	38.7053
	34.9247	32.6791	31.7059	30.7587	31.028	31.3228	31.8298	32.987	33.3842	34.0557	33.6434	32.5672	32.5205	31.7315	30.0077	30.315	30.6567	31.587	32.1852	33.3232	33.9086	33.1088	32.0687	31.1661	29.2412	160.561	231.926	244.503	233.406	222.544	208.223	190.116	174.798	162.522	146.883	136.241	124.97	115.233	107.509	99.6098	92.2601	84.286	77.8796	70.7648	63.1539	55.3055	50.508	46.3681	42.2146
	46.6891	44.4434	43.3067	42.3408	43.3246	43.3885	44.2986	44.9184	45.3152	46.6504	46.2642	45.3642	44.6456	44.6875	42.8757	42.5569	43.0956	44.6507	45.1018	46.7746	47.2993	46.4775	45.3296	44.3903	42.5104	218.267	242.381	246.226	236.221	225.071	215.199	198.966	186.933	174.051	159.93	150.308	139.879	131.774	125.898	118.935	112.873	106.742	100.684	94.9834	87.8696	81.8563	76.1435	72.8759	70.8187
	58.6976	55.4873	54.0993	53.1915	54.4581	54.0093	55.5812	56.2022	56.5444	57.8724	57.059	56.7484	55.9574	55.4269	53.8209	53.9665	53.9119	55.356	55.4238	57.4724	58.0305	57.5328	56.4871	55.4047	53.9662	111.62	115.156	116.398	113.988	111.829	107.939	102.939	98.5853	94.4908	88.7168	83.3634	78.9001	75.8588	73.8841	72.2108	69.8118	68.1288	65.3253	64.2897	60.5788	58.0762	56.9225	55.5771	55.8268
	59.3082	56.3817	55.3279	54.7672	54.9496	55.0273	55.4911	56.2973	57.6035	57.9294	56.6731	56.6691	55.9405	55.6818	53.9057	54.3787	54.3646	55.2186	56.1798	57.2488	57.6384	56.3104	56.0962	54.5075	52.6075	87.6136	92.6063	101.674	111.868	122.321	128.162	125.132	123.566	120.967	114.974	110.682	105.997	104.627	101.092	97.5167	94.0748	89.865	84.9106	81.0067	76.0604	71.5966	67.2786	64.3225	62.358
	44.7699	43.2269	41.7243	41.0604	41.4769	41.4102	42.5229	43.0082	43.4518	44.434	44.7036	43.7295	43.0683	42.9523	40.9796	40.9148	42.1757	44.0964	45.4249	45.1673	46.4846	44.7546	44.6284	43.0181	42.1583	241.658	248.995	247.332	238.311	233.724	220.356	203.773	186.783	176.008	161.416	150.724	135.83	128.8	118.883	112.225	106.863	98.5037	90.7433	85.5548	77.1195	72.7107	65.8142	63.3137	58.7197
	45.3903	44.2318	42.8124	41.8303	42.6995	43.3788	43.2991	44.9927	45.0303	45.9743	45.4045	45.0537	44.421	43.9366	43.1489	42.6311	43.0155	43.8026	45.2807	46.0427	46.5529	45.5788	45.5537	42.9819	41.5895	326.522	321.674	306.679	284.869	268.435	248.629	220.474	208.853	189.625	170.43	154.533	141.74	130.899	122.201	113.677	105.047	99.1878	92.0361	86.8217	78.7064	73.3025	68.3441	64.5816	61.1163
	37.8219	35.8136	34.4126	34.2095	34.4579	34.5008	35.1214	36.2976	36.9996	37.6495	37.039	36.6172	35.4914	35.2208	34.0961	33.1698	34.4598	35.2828	35.7574	36.9867	37.6588	37.3452	36.3601	35.2592	33.454	401.612	397.105	382.01	357.213	335.713	313.143	286.74	263.009	242.485	221.611	201.759	184.185	171.851	160.671	149.099	137.538	128.379	119.079	108.705	98.0983	87.7668	79.8781	73.4913	67.2676
	33.5224	31.4849	30.3426	29.2889	29.8432	29.8065	30.6089	32.3613	32.8179	32.9245	32.8108	32.3099	31.5407	31.2948	29.4332	29.1747	30.0024	31.3412	31.8872	32.5089	33.5425	32.6694	32.4299	30.9942	29.691	362.486	363.334	347.639	289.796	246.446	210.051	177.263	153.394	134.282	117.217	103.668	91.6452	84.4347	77.264	71.1449	65.3578	59.6643	54.628	49.6539	44.8744	40.8777	37.3729	36.0403	34.9456
	32.1098	28.8408	28.6152	27.4888	27.9526	28.2091	28.4967	29.7197	30.6769	31.4499	31.6756	30.7263	29.863	29.1069	27.7415	27.0842	28.0156	28.787	29.7419	31.2475	31.3978	30.7742	30.3239	29.0376	27.1853	322.132	324.63	336.366	299.685	271.219	236.83	206.069	180.693	156.519	132.941	114.499	100.622	88.9367	78.3053	69.9136	63.8369	57.0211	50.8721	45.7185	40.8161	36.0862	33.2378	31.9554	30.3292
	28.2913	26.7885	24.808	24.2625	24.6847	24.5895	24.9839	26.9189	27.4324	27.5131	28.0445	26.7512	26.9215	25.9426	25.0273	24.1739	24.8702	25.7742	26.5374	27.693	28.4568	28.4514	26.56	26.0286	25.0728	360.493	350.959	339.432	309.969	284.432	258.338	231.006	207.658	189.155	168.795	151.97	136.866	124.691	115.58	103.297	93.9804	80.9602	70.6125	63.4457	55.7869	47.0821	41.5959	37.2669	35.153
	51.8063	49.4953	49.1577	47.9742	47.7055	48.0707	49.2778	50.3423	51.5465	51.8149	51.2713	50.9054	50.1742	49.3827	47.2606	47.7787	47.7571	48.8781	50.0143	50.908	52.1248	51.2728	49.8929	48.6811	47.604	457.946	445.36	365.03	286.378	233.053	209.295	176.31	158.698	141.68	124.562	112.475	101.992	94.2994	88.6613	82.612	76.7294	73.0859	68.9353	64.3805	60.1212	55.8665	53.6382	52.5032	51.9484
	36.6443	35.3799	34.7042	34.3698	34.1842	34.3575	35.3537	36.3953	36.4596	38.8	36.701	36.3012	35.7769	35.0186	33.5969	33.3689	34.1759	35.5103	36.0973	37.1247	38.0853	37.1373	35.8622	34.967	34.0349	359.243	406.331	395.507	345.012	303.134	271.983	238.997	210.416	181.786	156.625	137.808	117.286	103.539	94.7094	82.7694	72.1873	65.347	59.6575	54.3597	49.0699	43.3493	40.8949	38.9479	38.7858
	11.156	11.4938	12.7732	13.5786	13.596	14.3364	13.5644	13.3141	12.2649	11.9628	11.4695	12.367	12.009	14.1046	14.7861	14.6913	9.12945	14.4498	12.2274	11.569	13.1174	13.6329	14.4733	14.9436	14.3454	11.8936	12.5254	13.446	13.8594	14.7493	14.7143	14.0767	12.4609	12.0306	13.1837	13.723	14.99	15.1574	15.3793	12.8612	15.4649	4.77778	14.3019	13.3025	13.6639	14.5331	14.7909	15.2963	16.7929
	21.5038	21.7009	23.0631	23.7536	23.8676	24.908	23.9149	24.2767	23.1272	22.7101	21.7104	22.9151	22.831	25.0766	25.7695	26.0531	19.5884	25.3103	23.4044	22.541	23.5839	24.6182	25.7092	26.0472	25.5906	22.7811	22.9976	24.018	24.9663	25.5777	25.2668	25.0164	23.4316	22.8001	23.6691	24.8814	25.4369	26.236	26.1126	24.0193	26.1437	15.2963	25.0809	24.076	24.274	25.7457	26.0094	26.7062	28.4543
	22.922	23.6044	25.4585	25.9213	26.6427	27.6782	25.9654	26.8601	26.1911	25.8484	24.61	25.802	25.7004	27.5635	27.8606	28.9207	21.8813	27.8027	25.1777	25.8121	26.7226	27.6812	29.1147	29.0487	28.4021	26.8923	26.4676	27.0253	28.5579	29.2045	27.6161	27.7994	25.3182	25.7101	26.7921	28.187	28.592	29.6045	29.8857	27.446	30.2788	18.6631	28.324	28.0626	26.9333	28.5478	29.2094	29.7662	31.4939
	31.2797	31.4687	32.7406	34.1125	34.0726	34.9557	33.2122	33.6108	32.7419	32.1381	31.1514	31.9548	32.471	34.5717	34.7875	34.9119	28.4536	33.8644	31.6306	31.7018	32.3187	33.0739	34.2336	34.6906	34.5277	31.1125	31.661	32.7881	32.642	33.6006	33.7013	33.1993	32.1171	30.7624	31.8201	32.9855	33.3969	33.916	34.8048	31.7754	34.3721	22.5119	32.9669	31.8839	32.3346	33.5207	34.3192	35.4448	36.7407
	17.0734	17.9026	18.974	20.3105	19.9773	20.5726	20.1687	20.1798	19.3048	18.8664	17.6189	18.7482	19.0102	21.1978	21.8377	21.5343	16.0175	21.3638	19.1301	18.3509	19.7684	20.4169	20.9275	21.7057	20.7222	19.1035	19.5936	20.5436	21.0074	21.6939	21.5877	21.2135	19.9472	18.8288	20.0396	19.9375	21.9105	22.0085	21.6789	19.6422	21.256	11.8452	20.7565	19.5048	19.7898	20.678	21.4778	22.2874	23.1897
	51.7162	52.669	54.0147	54.9986	55.5346	57.2667	55.5469	55.2982	55.959	54.1953	54.4674	55.6667	55.1835	57.4952	58.3281	58.4435	52.8548	57.9724	55.1345	54.0286	57.0345	57.3993	58.9291	59.119	59.2746	55.542	56.6079	57.81	58.3477	59.1426	59.8824	58.2175	56.8252	56.4636	57.5387	58.5501	59.9904	61.0946	60.8971	58.6611	62.7181	49.4482	62.0312	61.6364	62.4352	65.2684	70.2142	73.7072	76.4419
	27.2528	27.4159	29.9168	30.3351	30.7562	31.414	30.0937	30.0586	28.9554	28.8774	28.6067	29.4239	29.0236	31.0959	31.3221	32.064	25.5305	30.9107	29.1069	28.1789	29.5107	30.3316	31.7441	32.2324	31.381	29.0083	30.0494	31.2851	31.5842	32.9179	32.0812	30.8498	29.512	29.6968	30.6907	31.3949	32.1002	32.9638	32.518	30.085	33.1955	21.5204	32.3342	31.3491	31.3405	32.3751	33.3489	33.9724	35.8973
	35.7408	36.6003	37.3449	38.6173	38.9107	40.8196	38.7486	39.4688	38.2695	37.6929	36.6769	38.1703	37.2702	39.7467	40.6842	40.4187	34.0772	40.2912	37.9082	37.9266	39.2213	39.9241	41.2631	41.7599	40.6307	38.2895	38.7133	39.7717	40.4944	42.3432	41.5254	41.4327	40.0356	38.8839	40.2013	41.1744	41.6051	42.0912	42.2506	39.4203	42.8462	30.6517	41.8067	40.3603	40.5163	42.2313	43.1912	43.8345	45.6888
	47.311	47.4301	49.7895	50.9932	50.2581	52.4796	51.0725	52.0746	50.831	50.0824	49.0566	49.629	50.454	52.9177	53.049	53.568	46.8725	53.0308	50.3513	50.3881	52.0616	52.0428	53.5631	53.7476	53.0758	50.8187	51.8955	52.4799	53.5069	54.712	53.7867	53.5363	52.037	51.9861	53.1607	54.4606	54.4609	55.1118	55.8979	53.4817	56.2409	43.2664	55.8511	54.5266	55.0178	56.2746	57.3033	57.6195	61.681
	34.6408	34.5548	35.8794	37.2337	37.6965	38.0088	36.6325	37.8034	36.4074	36.3731	35.2229	36.547	35.844	38.3303	38.8537	39.6389	32.0318	38.4258	36.0224	35.3663	37.29	38.0003	38.8589	39.6355	38.9531	37.2658	36.9662	38.3137	39.0831	40.2382	40.1878	38.2665	37.1614	37.0686	38.18	39.3529	39.7096	40.0018	40.2353	38.07	40.3917	27.4976	40.0139	38.0069	38.914	39.0857	40.5259	40.2583	42.5837
	28.7443	29.8331	31.6691	32.7308	32.4857	33.6716	32.5687	33.1419	31.7951	31.2213	30.1121	31.723	31.0125	33.2498	34.2202	34.0237	26.976	32.7969	30.6233	30.0132	31.8739	32.7261	34.0525	34.6042	33.3768	31.1447	31.571	33.0447	34.1901	34.4908	34.7996	33.9404	31.8006	31.4726	32.9206	33.7325	34.1214	35.2795	34.6698	32.0467	34.3101	22.7978	34.0981	33.2784	33.6132	34.2781	34.9991	35.8699	36.8595
	34.9168	35.2347	36.6205	38.6551	38.0011	39.1392	38.2097	38.5234	37.8932	37.3644	35.592	36.861	36.982	39.1129	40.1412	39.8645	33.0702	39.9298	36.5414	36.5685	38.5087	38.3588	40.2229	40.8098	40.2082	36.7727	37.1906	38.4766	39.2967	40.9577	39.9816	38.9483	37.3006	37.3933	38.1932	39.8681	40.2808	40.5947	41.6222	38.2375	40.8544	27.8264	40.8273	39.2036	39.6254	40.3227	41.2449	41.6538	43.1715
	38.3375	38.5438	40.7461	42.2008	42.3965	43.8421	41.8408	42.7309	41.5799	40.293	39.6971	41.0369	40.3974	42.4802	43.0308	43.7662	36.4627	42.1953	40.4791	39.2387	42.1246	43.3113	43.3562	44.5031	43.922	40.6684	41.6079	42.0998	42.8986	44.515	43.8953	42.9742	41.3153	40.9612	41.5735	42.3448	43.2253	43.6906	43.9429	41.7771	44.0539	31.1775	43.8555	42.7552	42.4913	43.822	45.0615	44.964	47.2949
	24.7532	25.5009	26.9304	28.4517	28.9137	29.5293	28.2312	28.6119	27.5666	26.5048	26.0139	26.5662	27.6244	29.1247	29.9991	30.1982	22.2039	28.7185	26.9775	27.0349	28.365	29.8379	30.3251	31.1034	30.9485	28.2958	29.0662	28.9281	30.0075	30.4957	31.0663	29.1808	27.3733	26.9932	28.6932	29.5125	29.8637	30.6819	30.3419	27.9346	30.5979	18.5692	30.3549	29.0963	28.8032	30.8654	30.8509	31.8022	32.5837
	24.2102	25.2349	26.3292	27.4107	27.6383	28.6681	27.515	27.8966	26.9529	26.0046	25.6642	26.7113	26.3546	28.6908	29.1679	29.4671	22.6968	28.5112	26.3328	25.8001	27.264	28.0212	29.2189	29.6611	28.8189	26.201	26.938	27.6237	28.0384	29.6561	28.9892	28.2684	26.7276	26.3249	27.089	27.9272	28.6926	29.0201	29.0828	26.8028	29.3764	17.6102	28.4414	27.8782	27.5429	28.8744	28.9206	29.1267	31.7135
	41.7855	42.726	44.6975	45.3778	46.3046	47.1852	46.3248	46.7785	45.179	44.8065	44.1345	45.1092	44.4244	46.4906	47.3173	46.9586	40.3743	46.3877	43.7201	43.7626	44.8163	45.5467	47.0903	48.286	47.0007	43.8239	44.5396	45.8155	46.1857	47.1652	47.3637	46.3812	45.0059	44.5529	45.9919	46.5667	48.1058	47.6956	48.5082	45.8307	48.0644	35.8923	47.3512	45.9517	45.4401	46.9518	47.6235	47.5649	49.2369
	4.67083	5.54196	6.54207	7.79173	7.76677	8.59175	7.68813	8.05046	6.82382	6.30024	5.68671	6.61712	6.24228	8.70267	9.01446	9.22671	3.16644	8.27671	6.6993	5.7331	6.77955	7.70417	8.50944	9.02701	8.45082	7.15594	8.07433	9.08008	9.97334	10.828	10.4919	9.90235	8.59235	7.8629	8.89925	9.46058	10.5787	11.0717	11.1187	8.74332	11.0823	1.52029	9.71544	8.75831	8.92219	9.58539	9.92243	10.6161	12.2826
	6.61559	7.08902	8.43646	9.15256	9.00966	9.97182	9.12343	8.80322	8.2301	7.70528	7.48985	7.91305	8.04659	9.61171	10.0818	10.3013	4.88332	9.51541	7.83854	7.42865	8.68765	9.05759	10.154	10.0421	9.77872	7.66831	8.00647	8.99134	10.1309	10.5852	10.5377	9.75905	8.40542	8.07937	9.13134	9.42661	10.0719	10.9907	11.037	9.14082	10.9364	1.93662	10.1018	9.22712	10.0492	10.9777	12.3963	13.497	14.866
	20.9719	21.2413	22.2199	24.0638	23.8342	24.8642	23.9433	24.0773	22.7293	22.1915	21.5052	22.7006	21.7941	24.05	24.1954	24.566	18.2299	23.8084	21.6752	21.7985	22.8792	23.3637	24.6251	24.637	23.9138	21.348	22.0225	22.2843	23.8328	25.187	24.5343	23.8476	22.3239	21.4824	22.756	23.9048	24.3646	24.3767	24.9802	23.0204	25.0469	13.8821	23.9533	22.5916	23.0829	24.4017	24.799	25.5114	26.8004
	40.714	41.0529	42.5657	44.0355	43.896	44.7599	42.8048	42.9762	42.6015	42.0837	40.675	42.3761	41.7527	44.249	44.7395	45.7997	38.4734	44.8474	41.6638	41.6283	43.3083	44.4517	45.6265	45.4177	44.2018	42.3737	41.9543	43.486	44.3963	45.4553	45.4126	44.7639	42.4995	42.2341	42.8877	44.3336	45.4385	45.287	45.9075	42.6386	45.3851	32.4275	44.8061	43.4548	43.5035	45.0638	45.5334	46.1582	48.4877
	24.3241	25.1855	26.5435	27.8865	27.5127	28.1238	27.2828	27.549	26.2346	25.9231	24.9516	26.3744	25.9723	28.4855	28.8151	28.7781	22.0827	28.4022	27.142	26.3468	27.3935	28.4817	29.5656	30.0814	29.113	26.527	27.1268	28.095	28.8775	29.9131	29.7499	28.6207	27.5905	27.0677	27.8063	28.7006	29.8038	30.3612	30.4352	27.5708	29.9397	18.465	29.404	28.5945	29.124	30.6177	30.9613	32.9474	35.1904
	16.2478	17.125	17.9494	19.6341	18.9582	20.0413	18.8248	19.2362	18.175	17.1612	17.1319	18.2377	17.9689	20.1209	20.7349	21.5199	14.1057	20.5004	18.3725	17.8642	19.1441	19.7719	20.5484	21.1201	20.1024	17.9369	18.4082	19.7553	20.0889	21.0936	20.7987	20.4739	19.0166	18.748	19.1809	20.4241	21.4201	21.1358	21.9095	19.0198	20.7567	9.61539	20.5148	19.7038	19.9199	21.5304	22.798	25.1607	28.1189
	14.8064	15.1139	16.4287	17.1222	17.296	18.25	17.2656	17.5902	16.2128	15.6626	14.8127	16.0613	15.6517	18.1968	18.4721	18.6147	11.6318	17.8734	15.7075	15.5927	17.1212	17.7868	18.7032	18.6812	18.6137	16.0606	16.4992	17.5111	18.1171	19.1306	18.9833	17.9556	16.1207	15.517	16.9002	17.5204	18.4677	18.771	19.0798	16.4105	18.8948	7.75034	18.6812	17.9803	18.4189	20.3669	21.3599	27.3475	31.7788
	27.1723	27.0611	29.2537	29.3619	29.2252	30.0504	29.3767	29.3261	28.6319	28.1977	27.0866	28.1065	27.8879	30.6197	30.7854	30.9344	24.7802	30.89	28.5495	28.8169	29.9929	31.2655	32.4488	32.7428	32.175	28.2559	29.0348	29.3366	31.0062	31.1513	31.7611	30.8585	28.675	28.1112	29.0669	30.2429	31.0003	30.3546	30.8674	28.2598	30.0965	19.5642	30.1116	28.9443	29.3999	31.1396	31.7261	33.3559	35.4838
	11.8581	12.2759	13.0421	14.2441	14.5207	14.8763	13.8359	14.2814	13.5386	12.8835	11.8832	12.7938	12.576	14.783	15.2397	15.0769	9.14479	14.3777	13.1438	12.1846	13.4798	14.2426	15.3591	15.7233	14.97	12.6153	13.5691	14.3785	14.8756	15.5773	15.2971	14.3168	12.9776	12.5712	13.8098	14.4081	15.1081	15.3722	15.599	13.3157	15.147	4.70858	14.7593	13.7193	14.1708	14.9095	15.6983	16.4937	18.2475
	16.5545	16.8793	17.7921	19.2596	19.4898	20.5698	19.1324	19.2811	18.7212	18.2677	17.6914	18.3447	18.427	20.2522	20.6948	21.3068	14.7999	20.1551	18.485	18.2363	19.1463	20.1423	21.1958	22.0702	20.6322	18.9145	19.6448	20.1974	20.9868	22.1025	21.8733	21.8947	19.5826	19.3714	20.8779	21.2465	22.0939	22.5127	22.697	20.4003	22.5708	12.8513	22.5394	22.077	22.4852	24.7887	26.2192	29.13	31.1512
	31.2805	31.5749	32.8501	34.5844	33.8001	35.1538	33.7721	34.3475	33.2993	32.7752	31.5588	32.205	32.6116	35.2685	35.3025	36.03	29.9533	35.1765	32.8461	32.5627	33.387	34.3303	35.5094	36.2053	34.4987	32.0778	32.4683	33.3228	34.1203	34.8689	34.4591	34.0058	31.9858	31.5481	32.7012	33.5175	34.6753	35.0599	34.1729	32.7803	35.3047	24.3571	33.9892	33.4731	33.8949	35.3941	35.2972	34.7123	36.5685
	20.8891	21.0839	22.2491	23.4714	23.4778	24.6466	23.1805	23.1432	22.3446	21.5414	21.5676	22.4966	21.8801	23.8924	24.72	24.8896	18.2012	23.2517	21.4532	21.6671	23.0932	23.5015	23.8832	24.7498	24.0376	21.5037	22.2987	23.0793	24.0008	25.2374	24.2534	23.4404	22.2226	21.6321	22.6344	23.2604	24.8793	24.4557	25.0034	22.9029	24.1692	14.7569	23.3317	22.1497	22.7788	23.4475	23.5209	24.6238	26.3292
	15.6079	14.9045	16.9045	17.3993	18.3675	18.7279	17.2257	17.7917	17.0892	16.8378	15.5716	16.7055	16.3156	18.7373	18.5807	19.3637	12.3612	18.2967	16.5701	15.8646	17.1756	18.1485	19.2543	19.5212	19.3212	16.7571	17.5984	17.8754	19.2245	20.055	20.1315	18.6873	17.3706	17.2067	17.7729	18.8585	19.7641	20.0836	20.3256	18.4482	19.8451	8.00694	19.4413	18.3314	18.8319	19.5456	19.1539	20.594	22.2583
	20.9466	20.2058	20.2956	20.3718	19.7685	19.44	19.538	19.1677	20.0534	20.1765	21.2482	19.604	21.3238	21.4952	21.0425	20.5748	20.5338	19.8744	19.8653	19.4439	19.4293	19.3183	19.7404	20.555	20.9537	36.9798	67.0612	87.7441	97.8985	105.498	110.502	112.526	110.352	112.119	130.768	138.434	153.448	159.097	164.303	167.578	169.38	165.157	162.748	156.651	151.443	143.936	142.766	135.503	131.641
	43.4769	44.4695	43.4974	44.3839	44.0574	42.9474	43.4233	42.5378	42.9403	43.8704	45.6347	42.9556	44.3023	45.4857	44.6266	45.2813	43.6952	43.3587	42.9489	42.7658	42.6785	44.7385	44.09	44.6281	45.6058	466.467	510.043	504.711	472.012	433.067	388.949	357.893	341.363	307.227	300.302	284.338	278.911	268.19	257.189	252.341	245.575	244.247	239.774	224.673	217.305	214.145	211.999	204.218	198.637
	36.5469	34.8445	35.5706	35.8622	35.8447	34.0567	35.8537	34.7472	34.918	36.6055	36.8583	34.1768	36.3397	37.657	36.3651	37.4121	36.0537	35.8683	36.2906	36.3683	35.06	36.4041	35.8842	36.139	36.8958	395.769	411.079	401.463	380.815	356.912	326.023	307.761	292.202	267.577	251.593	239.055	233.047	222.368	216.105	205.118	195.813	194.959	186.434	175.148	168.832	164.724	162.092	156.716	151.61
	39.904	40.024	39.7561	40.2969	40.114	39.43	38.9668	38.5901	39.6237	38.6491	40.6147	38.6102	39.9821	40.8212	39.4799	39.7505	39.2052	39.4793	39.3234	39.2923	39.097	39.336	40.3709	39.6465	41.0548	85.4282	88.6207	93.1701	94.2655	98.75	94.264	97.1377	103.805	105.732	109.437	108.578	123.408	118.638	145.988	148.897	147.342	149.026	153.753	144.817	149.168	148.182	149.879	141.526	147.9
	71.228	70.6821	70.3972	70.9713	69.601	69.4477	69.299	69.0878	68.9478	69.7612	71.7962	69.9317	71.1071	72.6179	71.2666	70.456	71.0101	70.526	70.2912	70.2593	70.2107	71.2979	71.8095	70.953	73.2279	100.807	104.371	106.754	105.448	106.632	105.454	104.903	105.12	101.681	101.312	101.656	101.526	103.384	104.39	103.863	102.759	101.142	100.644	97.0033	95.1204	95.911	96.7497	95.4601	96.5634
	14.9613	15.7488	15.4393	15.6901	15.7736	14.9634	14.7002	15.0765	15.2041	16.0093	16.6157	15.5357	16.3981	17.2181	17.201	16.185	15.7187	15.4195	14.7778	15.389	15.0167	15.7751	15.5049	16.6438	16.2924	288.862	313.182	283.829	256.343	268.807	258.18	240.756	237.749	219.265	214.445	199.08	199.517	190.346	184.977	181.366	179.095	181.766	167.444	163.932	161.48	155.78	155.442	146.564	147.914
	8.15153	7.81267	7.76385	8.29699	8.05694	7.80447	8.57785	9.26561	10.171	10.2398	11.4331	10.5311	12.1102	11.9565	11.0802	11.2339	10.676	9.66744	9.82227	9.46648	9.94902	10.287	10.8283	10.6713	11.3181	32.3078	65.0357	96.7769	99.0039	98.9939	97.7797	104.104	98.0295	94.4546	96.3055	102.303	104.193	106.898	107.109	99.757	102.765	98.5654	103.032	101.738	97.8867	93.9874	98.838	99.89	98.2216
	20.6723	19.8455	20.0457	19.9634	20.0743	19.4182	18.6939	18.7971	19.3537	19.6486	20.8275	19.1322	20.7782	21.0375	19.7945	19.7955	19.0534	19.1405	18.6755	18.5487	18.3789	19.1104	19.8558	19.2804	20.2078	58.5058	98.111	120.719	130.993	135.635	137.256	143.01	137.483	133.221	129.581	133.256	130.198	131.625	126.812	120.781	119.209	112.548	110.974	108.795	108.295	104.056	102.979	97.741	100.039
	33.1144	32.6079	31.7983	32.5083	32.5919	32.1417	32.171	31.587	31.9567	32.5241	33.4553	31.623	32.9463	34.2627	32.3684	32.552	31.8491	31.0292	30.7137	30.5392	30.5834	30.8588	31.5919	30.8572	32.1862	50.8483	70.4235	84.3143	87.8639	88.8367	86.9427	88.4032	89.519	84.3719	89.6673	89.7379	89.2956	94.7402	95.458	93.3261	93.6727	92.1685	91.1136	88.6141	83.309	81.4322	85.4276	85.3115	86.6918
	67.0669	65.9132	65.1905	65.9256	66.463	65.2044	65.0752	64.6505	64.0686	64.6153	66.6004	65.3374	66.4518	67.1853	66.074	66.9316	66.3554	65.2038	66.7016	64.5606	65.6005	65.4729	66.2076	66.2526	67.5348	159.869	444.144	426.732	358.521	333.02	333.795	327.236	308.14	313.191	274.012	279.617	274.242	252.71	261.421	259.238	238.718	232.321	214.064	225.064	209.106	209.847	204.518	202.469	186.365
	50.5819	49.8173	49.6808	50.4152	50.0239	49.1241	49.7286	50.8416	49.9509	50.1475	51.4108	50.1018	51.827	52.3988	51.3387	51.1201	50.858	50.5916	50.4759	50.6911	50.4332	51.4275	51.4453	51.9461	52.9564	364.542	369.76	353.959	335	326.986	311.96	295.669	282.757	265.365	254.985	243.658	236.493	228.736	219.476	210.725	204.393	200.463	189.656	181.462	176.656	170.925	168.99	162.262	160.953
	1.36072	1.19573	1.10216	1.24367	1.40151	0.883513	0.865314	0.888887	0.715665	1.36893	2.22835	1.3332	2.29142	3.08798	1.9581	1.87668	1.68909	1.05799	1.21225	0.750743	0.947787	1.59338	1.93621	1.91922	3.2882	345.975	353.943	340.545	316.845	286.507	257.098	238.396	222.844	206.326	197.5	187.781	184.746	181.059	172.915	164.291	154.472	144.445	135.009	126.241	123.985	116.977	113.487	108.696	110.59
	10.8807	10.7555	9.72458	11.0573	10.632	10.6856	10.6193	10.6802	10.3733	10.8055	12.2711	10.6602	12.3551	12.6995	11.2023	12.0535	11.0665	10.6426	10.5195	10.2988	10.7958	10.9592	11.7842	11.3109	12.6697	182.465	176.707	172.751	177.257	174.195	174.969	182.946	188.352	182.293	183.23	183.745	186.084	190.576	184.504	176.756	175.791	172.199	156.512	149.305	146.921	141.174	135.082	127.333	125.944
	11.5842	11.7233	11.3008	11.7979	11.2798	11.1264	10.5045	11.4654	11.3106	11.3206	13.5402	10.75	12.0309	12.4454	12.1161	11.5414	9.97777	10.4953	10.4938	10.4962	9.79234	10.9629	10.4154	11.1475	11.0686	298.878	261.234	221.842	228.203	253.873	225.843	203.783	187.765	169.087	170.236	174.832	178.599	160.911	141.57	148.196	156.1	140.884	138.942	137.62	130.263	133.307	135.424	132.527	128.488
	19.2338	19.0876	19.1557	19.0905	18.776	18.747	18.4467	18.8844	18.8715	19.0777	20.5311	18.9771	20.2259	20.8998	19.4838	20.1455	19.4585	18.8978	18.7741	18.3103	18.7119	18.6153	19.4809	20.1508	20.4477	80.4265	85.8152	87.8654	86.5588	86.6697	84.4775	82.0528	79.2359	74.247	72.1404	72.469	71.6454	70.9424	69.2114	68.2526	67.2415	64.4897	62.2442	59.908	56.7429	56.0855	56.7587	55.9301	55.6253
	27.3593	27.4926	27.2121	27.2778	27.671	26.8074	26.2209	26.2846	26.7339	27.1273	28.5535	26.5948	28.9013	28.8283	27.8999	27.8912	26.1523	27.7105	26.0058	26.0886	26.1133	26.5639	25.9195	27.9021	28.0927	61.1869	77.7631	84.0048	85.8675	85.7969	83.9779	81.3227	78.4244	73.9921	73.0639	70.623	70.1244	71.8009	70.8496	68.3897	65.7644	64.3844	62.4877	59.7292	58.1946	58.1028	57.1078	56.4707	55.7246
	9.74768	8.67008	8.34967	8.71989	8.08987	8.61351	8.25849	8.37576	9.00783	8.49779	9.62412	8.94356	9.33923	10.1974	9.1533	9.54078	8.87811	8.17823	9.04199	8.11658	7.71924	7.89894	9.23404	9.06803	9.66257	68.0907	87.072	94.1895	102.512	109.026	106.989	103.018	99.77	90.2829	85.4735	84.2239	82.9654	79.0968	76.7181	73.5382	71.8887	69.2358	67.1993	63.9848	60.7728	59.5079	61.3795	59.7729	59.5362
	13.7314	12.4434	11.0902	10.7758	10.8253	11.0276	12.4514	12.7825	13.1452	14.1591	13.5472	12.2229	10.865	10.3028	10.3062	11.4541	11.5955	13.456	13.4353	13.332	11.56	11.4723	10.6	9.50441	10.6587	11.147	12.1874	13.3663	14.6125	13.6826	12.5132	11.7588	10.8817	10.3271	11.4904	12.3618	13.1816	14.2096	14.3633	12.3452	11.2149	11.1796	13.6759	14.4534	15.0541	13.7929	12.1864	11.4852	12.6978
	17.1079	15.1985	14.6683	14.0364	13.6613	14.5659	15.2806	15.3111	15.4863	17.1431	17.0291	14.7068	13.8885	13.2058	13.4387	14.3828	15.2017	17.0986	16.8273	16.2058	15.4273	14.9297	13.9275	12.8193	13.4985	14.6298	16.0405	17.4322	18.1866	17.6763	16.7801	15.5876	13.8468	14.7447	15.0618	15.6909	17.3346	18.3117	17.8116	16.0063	15.5906	15.796	16.636	18.6731	20.1152	19.5692	16.6717	17.6839	17.6464
	24.7353	23.0982	22.4942	22.0869	21.5147	22.7051	23.5458	24.0234	24.2238	25.935	25.1015	23.5184	22.5734	21.3246	21.5788	23.0053	23.5452	24.7978	25.8403	24.9023	23.512	22.9709	22.9808	21.602	22.574	23.0675	24.3966	25.3488	26.6294	25.9975	25.6273	23.6871	22.9831	23.3133	23.7412	24.6336	25.8081	26.4533	26.6886	24.6009	23.9564	24.2681	26.5913	27.0888	27.5188	26.6888	24.3083	24.2345	25.9971
	30.4136	28.2059	26.7628	26.3439	25.4269	26.3448	27.0903	27.7927	29.477	29.3414	29.2063	27.0581	25.129	24.804	25.2883	25.9152	26.7692	28.1657	28.2185	28.0964	26.3028	25.3454	25.746	24.1367	25.5832	24.7446	26.4951	27.8566	28.243	27.6461	26.8997	26.1199	24.9647	24.6777	25.4713	26.6423	27.2549	28.3415	27.8773	26.8409	25.2628	25.8723	27.0655	28.522	28.4983	27.0282	25.4767	24.3491	25.5033
	22.4691	20.5266	19.3295	18.7055	18.4413	19.0404	20.0575	20.4991	21.4296	21.4433	21.3588	19.8423	18.2971	17.7161	18.1624	19.5131	19.6188	21.2631	21.7276	20.9175	20.1012	19.4566	18.7059	17.5317	18.0927	18.1917	19.4607	21.106	22.3331	20.9012	20.3593	18.4155	17.5357	17.5837	18.9278	19.0292	20.1048	21.3142	21.3689	19.0702	18.4319	18.3358	19.773	21.0883	21.2964	20.2262	17.9573	17.6661	19.0639
	60.8508	59.1485	57.8239	56.8396	56.3843	56.8492	58.2408	59.1771	59.5843	60.8383	59.6575	58.7442	56.0294	56.1179	56.397	56.6751	58.4663	59.609	59.2881	59.1208	57.7104	56.8224	56.0742	54.505	54.8165	56.0781	56.8893	58.2749	60.1709	57.7159	58.0139	56.862	55.0409	55.7247	56.197	57.0562	58.9762	59.2763	59.8628	57.2784	56.4369	55.5565	58.3091	59.6997	59.675	58.7169	55.3884	55.5611	55.9475
	25.4937	23.7047	23.3281	22.2896	21.8349	22.9247	23.3309	24.5201	25.042	24.4643	24.0355	22.4915	21.5875	22.166	22.5106	22.3542	22.8028	23.9877	24.1648	23.0834	23.4558	21.6483	20.7506	20.2089	21.0501	21.073	22.1788	24.3485	25.1208	23.3901	23.1301	21.2411	19.9057	19.4989	21.6698	22.0179	23.1381	22.6554	24.5715	22.5484	20.866	20.4849	22.4391	23.8284	23.9566	23.0694	20.5754	20.6526	21.78
	26.9344	25.6357	23.5707	22.5787	22.8076	23.4552	24.3961	25.4408	25.9059	26.7549	26.1172	24.5773	22.4856	21.7918	22.751	22.8036	23.7532	25.0428	25.9101	24.9859	23.6099	22.5182	21.8682	21.3601	21.8676	21.866	23.0162	23.933	24.9752	24.8967	24.0927	21.9834	20.6628	20.5617	21.5403	23.1011	23.5891	24.4569	24.7678	22.113	21.0567	21.1605	23.9604	24.8347	24.9519	23.9665	22.0365	20.984	21.8538
	20.591	19.6305	18.7155	17.8691	17.8617	17.9309	18.8752	19.9735	20.8283	21.0488	20.8673	19.2136	17.8607	17.2465	17.2475	18.2321	19.1213	21.5168	20.7729	20.6349	20.1088	18.3094	17.6965	17.6881	17.7435	18.6323	18.8326	21.0255	22.0432	20.693	20.7088	18.9405	17.4972	17.685	18.9155	19.8962	20.4886	22.1162	21.4421	19.4308	18.6633	18.1794	20.5553	21.5016	21.7857	21.2427	19.313	17.6936	19.1119
	54.7935	52.7398	50.8849	51.277	50.5472	51.5168	52.3237	54.0269	53.6085	55.1698	54.2018	52.8845	51.6778	50.6076	51.5398	51.9087	53.7	55.0656	55.095	54.8232	53.4443	52.6736	52.6714	50.4268	51.2143	52.7392	53.411	54.9474	56.648	55.2166	55.2867	53.9543	51.8433	52.9175	53.2012	53.4695	55.1611	56.4703	56.5069	54.4481	53.5466	53.9437	56.3146	57.221	57.1167	55.8875	54.2172	53.8998	55.173
	28.4426	26.704	25.8745	25.3408	25.1913	25.4808	26.1024	27.031	27.6363	28.464	27.9003	26.0741	25.2128	24.0895	24.5711	25.3335	25.8384	27.4973	27.55	27.5646	25.7963	25.3555	24.5388	23.9585	23.9814	24.1234	25.2537	27.1861	28.0269	27.0332	25.9962	24.7114	23.4903	23.9622	24.8849	25.726	27.0612	27.4698	27.6067	25.4475	25.1318	24.6465	26.1544	27.7207	27.577	26.7842	24.9039	24.24	24.8501
	23.8222	22.6257	21.3691	20.9388	20.3991	21.1626	22.1109	22.5754	22.7584	23.2627	22.6711	21.0546	19.4052	18.6366	18.7083	19.6067	20.1395	21.4679	22.8077	20.8817	20.3152	18.9004	18.097	16.8472	17.6491	17.9915	18.6574	20.2172	21.41	19.1179	19.307	17.8479	16.3401	16.5444	18.0745	17.9589	19.5955	19.7245	19.3564	17.5036	16.8919	16.6759	18.2773	20.0281	19.5312	18.69	17.1771	16.6522	16.7716
	14.076	12.3718	10.9513	11.3121	10.0705	10.5097	12.0923	12.5971	13.4037	13.833	13.5172	12.0916	10.9064	9.99666	10.4992	11.4824	11.918	13.4999	13.561	13.2382	12.0771	10.9237	10.8491	9.61325	10.4688	10.8862	11.6048	13.5304	14.3879	13.0133	12.8889	11.1745	10.425	10.6156	11.3304	12.128	13.2499	14.5638	14.2612	12.4486	11.354	11.6378	13.1583	14.584	14.4789	13.2869	11.6883	11.5673	12.2749
	8.22459	6.21256	5.37705	4.63955	4.3661	5.11889	5.72055	6.24686	7.32797	8.13721	7.66467	6.4908	4.89033	3.88457	4.73527	4.70106	5.46024	7.18192	6.97436	6.5647	6.06982	5.14492	4.58347	4.2301	5.26154	4.48214	5.35442	6.57727	7.61166	6.57353	6.31509	5.15492	4.28517	4.35398	5.1599	5.86455	6.36118	7.96056	7.25368	5.96824	4.65031	4.9755	6.9268	8.03215	8.457	7.14272	5.57513	4.86041	5.57207
	14.7563	12.0215	11.1988	10.1351	9.44387	11.7134	12.0646	12.44	12.9079	13.3938	13.9338	12.0711	10.4995	10.3691	10.2996	11.3974	11.1485	13.5715	12.8709	12.1613	11.1982	11.0635	10.9654	9.24572	10.0392	10.4391	11.947	12.5095	13.5659	12.6957	12.1712	10.7128	9.78063	9.83264	10.6939	11.5814	12.6921	13.2668	13.5735	11.4198	10.5572	9.79203	11.7346	13.5527	12.9191	11.7618	10.4708	10.5075	10.8527
	52.5969	50.8645	50.1488	49.2437	48.4249	49.1547	50.5817	51.2026	52.0925	52.5188	52.3202	50.4674	48.9234	48.3564	48.3213	49.1223	50.291	51.7639	51.8587	51.1116	50.1117	49.704	48.9901	47.8096	48.4815	48.9763	49.7837	51.717	52.3865	51.4561	50.7743	49.7289	48.0207	48.7755	49.3134	50.0993	51.1886	52.4077	52.7046	50.3604	48.9298	48.871	50.9754	52.0071	52.6835	50.9126	49.0434	48.6002	49.6187
	45.1053	42.527	42.3737	41.4937	41.1246	42.1625	43.3871	43.6728	43.1934	45.2239	43.645	43.1198	40.5331	40.9384	41.0354	41.553	42.3289	44.5791	44.2162	43.757	43.0794	41.9376	41.48	40.0168	40.5088	41.4181	42.3797	43.4238	45.2055	43.2782	43.5247	42.0385	40.1007	41.1619	41.7697	42.027	43.5008	44.812	43.9976	41.8141	41.0672	42.1955	43.3441	44.742	44.6361	43.2426	40.3867	41.1771	41.5975
	40.4087	38.2032	38.077	36.6328	36.2941	36.8239	37.6272	37.911	37.6191	38.7932	38.2528	36.9209	35.1492	35.3508	34.672	37.2109	37.4493	38.324	38.1473	38.7888	37.1175	35.9996	35.5453	34.6795	35.0605	35.7569	36.8581	38.269	39.52	37.36	38.5353	36.5099	34.7072	34.3977	36.8005	37.8033	38.2082	39.7268	38.8532	37.2719	36.3982	36.5582	39.0289	39.5654	40.8122	38.1378	35.9103	35.7464	37.1723
	24.0875	21.9584	21.8233	20.9412	20.1973	20.8997	22.2549	22.9707	23.3262	24.2821	23.8233	22.2769	20.6769	19.9766	20.1789	21.3232	22.2961	24.0238	23.4978	23.2338	21.8261	21.4488	20.7917	20.1656	20.7503	21.3644	22.7127	23.9273	24.7228	24.3404	23.9374	22.6043	20.6478	21.1428	22.1369	23.0969	23.7499	24.7758	24.7693	22.6981	21.6479	21.8148	23.6877	25.2717	25.0173	24.2062	22.2405	21.7223	22.7029
	24.3246	22.4867	21.2348	20.3105	19.7344	20.1186	21.3494	21.8374	22.8156	23.2803	22.9347	22.0332	20.7431	20.1664	20.4401	20.4385	21.7586	23.0983	22.3705	23.2178	23.0193	21.3078	20.6725	19.2532	20.6409	21.701	22.9299	24.291	25.2697	24.3695	24.0001	21.8435	21.0004	21.1324	22.4106	22.6365	23.9635	24.4244	24.2206	21.9652	21.1286	21.2214	23.0298	24.3688	24.2343	23.128	20.727	21.078	21.9327
	57.9644	55.4103	54.4531	54.8211	54.8287	54.6978	56.1442	57.1629	57.3724	58.7862	57.5899	56.4151	54.879	53.2262	55.0982	55.171	56.5508	57.7196	58.2118	57.45	56.9209	54.9948	56.1182	53.1844	55.2211	55.2846	55.9548	58.6822	60.5048	57.6299	58.3821	56.4788	54.7754	56.0188	57.3058	57.1186	58.675	60.3416	60.2693	57.8673	56.6573	56.9867	59.5484	60.4624	59.774	58.6119	57.869	56.2041	57.4127
	38.2683	35.6881	35.0332	34.9953	34.7839	34.6462	35.7119	35.707	37.0641	37.0558	37.1162	35.5735	34.4824	33.6509	33.6993	34.7101	35.4898	36.2936	36.6447	36.5786	34.9977	34.1008	34.3057	32.7428	33.6912	33.9183	34.6348	36.3909	37.4571	36.7002	36.4596	34.2602	33.3297	33.7402	34.3843	34.5222	35.9453	37.1585	37.336	35.1074	34.1178	34.4776	36.0949	36.9456	37.5733	36.0247	34.3026	33.7127	34.6601
	26.1648	23.7854	23.8101	23.0884	22.423	22.4598	24.5506	24.9959	25.4487	25.977	26.1192	24.3658	22.4675	21.8315	22.1239	22.2198	23.6826	25.0218	25.1583	24.2434	23.506	22.0416	22.517	20.8132	21.8749	22.2984	23.3424	25.0541	25.617	24.9779	23.7354	22.9004	21.9294	21.5626	22.3113	23.5379	24.3413	25.1613	25.0662	23.2313	22.165	22.4007	24.4516	25.7057	25.4929	24.8958	22.3306	22.0689	22.6626
	20.197	18.987	17.3123	17.4736	17.0894	17.9415	19.0205	19.981	20.03	21.3027	20.1858	19.2085	16.9739	17.1191	17.3923	17.7793	18.9277	20.575	20.2313	19.4522	19.5529	18.431	17.8832	16.6794	17.971	18.1803	18.1732	20.934	21.4327	20.4491	19.5879	18.8806	17.5063	17.4019	18.8989	19.3137	20.1816	21.6038	21.6249	20.1908	18.3476	18.992	20.7415	22.1355	21.9718	20.8483	18.918	18.8496	19.5418
IP3R1 shRNA	21.7508	17.2825	16.3978	16.8301	17.4023	18.0941	17.9424	18.9836	19.3428	19.7794	20.4546	20.7643	20.7624	20.7942	21.0424	21.7	21.9264	22.2171	22.1289	21.9685	22.3837	22.3373	22.5977	22.8982	22.8151	30.2374	36.8561	41.1828	43.8177	45.5578	46.0158	46.9784	47.9107	47.1294	47.9149	47.2509	46.545	46.9922	47.0842	45.4165	45.6349	45.3804	45.9051	45.2261	44.0422	43.4649	41.9968	41.71	41.2611
	31.9671	27.4538	26.6827	26.6955	27.533	28.5601	28.4354	29.0865	29.8314	30.4702	30.8434	31.1519	31.5819	31.4486	31.982	32.2483	32.4675	32.8557	33.1798	32.5832	32.9164	32.8917	33.5895	33.698	33.3061	70.1398	67.8871	65.3684	62.0686	62.3697	61.0449	61.7317	62.0174	60.6813	61.9695	60.4496	60.5988	60.6266	60.0105	57.7684	58.255	57.7818	58.3721	58.0226	56.406	56.3808	55.1141	53.6324	53.9188
	30.706	25.5224	24.868	24.8292	25.8295	26.8521	26.6251	27.0711	27.87	28.2921	29.2323	29.6572	29.9235	29.7669	30.5681	30.557	31.1471	31.1299	32.0311	31.2836	31.4766	31.9795	32.1686	32.6001	32.0486	49.4677	49.5533	49.6723	50.4517	51.0888	50.7531	51.2875	52.3878	50.9708	51.6212	50.2952	50.6815	51.1814	50.5551	49.2752	50.0535	49.5796	50.5746	50.0974	48.5233	49.0265	47.6841	47.109	46.458
	30.6481	26.3458	25.7212	26.0289	26.8015	27.4865	27.9779	28.7982	29.3919	29.7403	30.2778	31.0484	30.918	30.7634	31.1352	31.4542	31.8861	32.2971	33.0875	31.9108	32.4583	31.8664	33.089	33.217	32.8743	175.949	228.445	216.613	192.68	174.785	159.41	149.419	144.16	134.336	131.251	125.745	123.215	119.598	115.791	111.018	107.516	105.094	104.833	102.928	97.8537	94.5788	90.867	88.0887	86.1819
	23.6679	19.3594	19.0511	19.3533	20.2059	21.4174	21.072	21.9821	22.6228	22.8745	22.9226	23.949	24.1734	24.3214	24.3114	24.5175	25.2499	25.9058	26.323	25.64	26.032	25.5472	26.2956	26.8454	26.2998	308.955	383.606	300.539	239.916	212.655	205.144	200.328	198.19	192.32	184.718	183.342	178.96	178.548	175.521	169.614	163.153	158.046	156.718	153.695	147.536	144.051	137.946	134.943	129.105
	16.2095	12.6048	11.79	11.8863	13.3601	13.3657	13.1206	13.5177	14.3923	15.1043	15.704	16.2843	15.7937	16.2171	16.7215	17.0831	17.2385	17.8601	18.247	17.6906	17.9539	17.9947	18.3614	18.6732	18.5475	128.571	281.123	261.731	212.118	180.691	158.129	147.45	143.357	134.205	136.442	132.875	138.829	137.649	132.018	128.322	123.934	124.591	128.391	129.628	126.983	123.2	120.969	118.065	116.76
	5.0477	1.37036	0.735598	0.780623	0.988291	2.0131	2.56144	3.22356	3.63804	4.21658	3.86942	5.0241	4.46121	4.67341	4.49113	4.60392	5.17208	5.15569	5.72894	4.94579	5.82285	5.11077	5.80472	5.93926	6.09992	68.7502	89.1091	90.996	90.0384	89.9141	84.2192	85.8399	87.682	83.0292	80.3439	76.8931	76.2719	74.7394	72.1297	69.2276	68.8892	65.5315	65.6723	61.7041	58.9215	57.9157	55.0356	54.5348	52.0707
	20.1243	15.5543	15.0339	15.3857	15.9607	16.463	16.6486	17.1909	17.8199	18.3335	18.7857	18.9194	18.9697	19.3785	19.3046	19.3856	19.7969	20.4177	20.3523	19.98	19.9243	20.329	20.9291	20.8964	20.8182	27.5194	29.6637	33.0645	35.1355	38.0098	39.7126	41.1468	42.2835	41.2044	41.8932	40.5739	40.1736	39.7331	39.8942	38.5342	38.5903	38.2617	38.769	38.3917	36.785	36.3223	35.2921	34.6174	33.7579
	18.2233	13.3645	13.16	13.2869	14.448	14.8921	14.7653	15.6088	16.1075	16.4974	17.0101	17.0906	17.8272	18.1412	18.056	17.9975	18.4457	18.7284	19.375	18.7495	19.0896	19.3561	19.9081	19.8031	19.7853	27.6116	30.6652	36.7914	45.317	57.9753	67.051	76.321	78.4247	76.7542	77.7209	73.4861	71.47	70.1307	69.0157	67.305	64.971	63.5368	62.268	60.7165	57.6689	55.8947	52.8062	50.806	48.9968
	3.57651	-0.185058	-0.610756	-0.721217	-0.112633	0.923263	0.751693	1.27756	2.06349	2.20019	2.21327	3.39939	3.45481	3.39725	3.37613	3.53924	3.77633	4.40365	4.74442	3.92891	4.15505	4.85945	4.77669	5.53893	4.67555	39.0691	42.4157	42.1237	40.4136	41.6365	40.902	40.3643	41.398	39.6993	39.1337	37.356	36.3471	37.221	36.5029	34.064	34.0916	33.3255	33.5176	32.5635	30.8111	30.581	28.9921	27.8278	28.3553
	13.4386	9.25645	8.65428	8.6145	9.73955	9.99366	10.2466	11.0093	11.3562	12.0419	12.6426	12.9288	13.071	12.9353	13.0651	13.5719	14.1446	14.1713	14.439	14.4533	14.4647	14.7716	14.9583	15.0399	14.7746	51.6695	60.8158	68.6519	74.2203	80.6476	81.8129	83.7602	88.3882	87.0308	88.571	85.0537	82.8746	81.9673	79.0006	73.9744	73.9974	72.4544	71.7096	70.0915	66.6807	65.111	61.5774	59.1183	57.1132
	13.7471	9.29851	8.71433	9.01968	9.67268	10.5188	10.3864	11.1201	12.0403	12.4062	12.9433	13.009	13.3687	13.5496	13.8268	14.2092	14.3292	14.5576	14.7608	14.7063	14.7284	14.8342	15.3246	15.6171	15.3346	42.1792	53.8603	61.6253	67.9877	72.4927	76.5393	79.8248	82.976	83.0122	86.2558	85.4961	84.9252	84.3799	83.8499	81.4105	80.8317	78.4997	78.3422	76.5535	72.8526	70.052	67.4078	65.2947	63.2852
	12.5247	8.34636	7.61794	8.03394	9.49688	9.5145	9.75784	10.6328	10.9848	11.7058	11.7841	12.4255	11.8442	12.6662	12.8226	13.0696	13.6817	14.2771	14.8439	14.1122	14.71	14.7045	14.9187	15.5492	15.6494	198.767	187.546	174.681	162.796	148.89	139.324	142.462	140.957	135.635	134.887	128.732	129.077	125.234	118.663	111.405	105.212	103.267	100.633	96.5907	92.9571	89.3488	86.3519	81.6053	80.2747
IP3R1 shRNA+IP3R1	37.993	37.6882	36.4996	37.2914	36.6771	34.956	34.703	33.7827	33.9145	34.3289	34.1955	34.8956	36.0463	36.8516	37.427	38.1742	37.9581	39.3246	39.9735	38.8177	39.2275	39.4713	39.07	39.3204	38.9275	677.569	527.348	394.968	293.992	248.165	229.311	233.959	228.924	217.432	206.035	189.256	176.625	164.881	151.387	139.147	127.175	118.504	109.792	102.835	95.147	89.2558	84.5159	80.0392	76.2182
	38.5768	38.3126	37.822	38.7475	37.3065	35.9233	35.7701	35.6832	35.2335	35.7743	35.8078	35.9432	37.2582	38.496	39.1831	39.581	39.3799	40.6537	41.2916	40.4214	40.5912	41.3201	40.4207	40.5798	40.3343	165.768	172.142	166.387	157.305	153.214	146.604	142.888	134.715	128.772	122.977	119.822	116.367	116.297	110.685	104.772	101.24	98.2769	95.2182	92.081	88.7984	87.0161	84.579	82.5668	80.6512
	35.0752	35.1524	34.2434	35.0506	34.7165	33.0603	33.0496	32.3659	32.5969	33.8169	32.915	33.0199	35.1616	35.8899	36.3634	37.4087	36.9178	38.4702	38.5878	37.9161	38.2449	38.6431	38.1273	38.6192	37.8528	560.062	451.686	318.044	227.09	175.995	147.05	132.012	129.047	131.497	141.561	153.18	157.14	154.48	145.228	140.048	132.089	123.227	114.879	106.996	99.5772	93.2864	86.9186	82.8601	81.2728
	21.5742	21.0408	19.7868	20.6048	20.0722	18.5545	18.2208	17.947	18.3563	18.6002	17.5255	18.9204	19.6334	20.6723	20.7582	21.4757	21.7256	22.5873	22.7768	21.9142	22.1613	22.6628	21.692	22.7913	21.6881	245.2	237.247	201.939	165.421	139.957	126.195	116.329	111.82	108.353	110.204	112.141	112.252	110.356	105.113	99.6192	95.1942	90.1673	86.9126	80.9117	76.365	73.2581	69.3822	66.0524	64.3848
	24.0767	23.2318	22.27	23.1941	22.0293	20.7115	21.0101	20.216	20.3546	20.3736	20.4043	21.3703	21.9424	22.8107	23.0815	23.5252	23.427	24.579	24.2047	23.7171	24.6133	24.9954	23.7033	23.7699	24.0395	632.232	438.374	314.098	246.117	228.693	226.741	224.206	210.582	191.547	176.367	158.223	146.032	137	126.548	115.953	106.117	99.5635	91.3366	82.9626	77.5532	71.2971	66.401	62.088	58.9616
	21.9558	21.7325	19.8682	20.7874	19.6937	18.9444	18.6147	18.1609	17.8276	19.0053	18.7645	19.2386	20.6216	20.7348	21.6446	21.9929	21.5734	22.1719	22.8021	22.5642	23.2527	23.2736	21.8417	22.5892	22.2173	586.697	415.969	300.712	238.951	217.802	219.362	213.137	199.938	184.83	167.062	150.772	140.369	131.848	121.552	112.929	102.438	96.3354	88.3784	80.4336	74.5224	68.9421	63.9521	60.2185	57.2111
	41.4124	41.2457	39.6586	40.839	39.9646	38.3515	38.055	37.428	37.3294	37.8418	37.7305	38.1442	39.4085	40.2734	40.8394	41.2085	41.085	42.416	42.8995	42.0446	42.0426	42.275	41.7194	41.9695	41.8384	639.708	480.434	313.057	207.892	154.558	124.232	108.414	99.189	93.8143	98.4073	110.856	130.559	165.623	190.765	195.682	175.099	157.284	138.912	122.448	112.162	107.58	103.728	100.211	96.8031
	30.0713	29.2741	28.1798	28.8192	28.302	27.2353	26.5301	25.8967	26.1029	27.0463	26.7546	27.0113	28.5805	29.4365	29.7612	30.2013	29.8549	31.8337	31.7428	31.4626	31.6278	31.6959	30.8541	31.1919	30.7764	573.38	461.446	355.532	278.706	232.779	205.432	197.547	190.097	179.465	172.19	160.678	150.643	141.4	132.461	122.779	113.191	105.361	98.1427	91.2577	84.8818	80.1242	76.0956	71.544	69.1836
	25.3984	24.99	23.8901	24.1017	23.7071	22.2513	22.1237	21.5502	21.8802	22.1564	22.3164	22.7645	23.9823	24.7661	24.8765	25.3217	25.4497	26.6499	26.822	26.0252	26.5919	26.8371	26.3504	26.8661	25.9809	758.441	619.55	467.367	345.705	272.782	230.533	212.972	205.867	194.657	186.862	178.192	169.032	160.106	149.424	138.953	129.519	121.796	111.614	104.246	97.6854	90.9557	85.3094	80.3806	77.8365
IP3R1 shRNA+IP3R1 1-604	37.8333	26.6652	25.9725	26.477	29.5551	31.1424	30.8426	30.6968	31.064	31.172	31.1364	30.8038	30.2134	30.8487	31.1332	30.7578	30.6851	29.9376	31.2201	30.7871	31.6944	31.2378	31.1717	30.6727	31.6962	31.2504	31.1992	32.1908	31.0227	32.0376	32.6481	33.3848	33.8406	37.6855	46.6349	60.5658	99.0174	155.448	182.624	192.522	198.853	194.159	184.79	177.709	175.814	169.473	164.216	156.617	150.318
	40.3721	27.9351	28.0015	28.3418	31.6424	33.2862	33.1319	33.2351	33.6369	33.4717	33.4434	32.4582	33.2254	33.058	33.9414	33.3707	33.3419	33.5617	34.2296	33.8112	35.1706	34.8954	35.5778	34.3257	34.9756	35.4564	34.3825	35.1677	34.5022	36.0898	36.9383	38.1398	38.6686	41.366	44.9086	50.0787	65.1857	90.8259	106.536	115.768	121.466	124.341	121.947	118.001	115.134	111.256	106.238	100.205	95.5819
	34.6934	22.3922	22.5785	22.9041	26.0389	27.5168	27.2823	27.3339	27.083	27.5674	27.1103	27.1209	26.9148	27.7162	27.642	27.687	27.4828	27.1703	27.9726	27.3061	29.2157	29.2697	29.2039	28.7561	29.6464	29.0278	29.7807	29.5859	28.4929	30.663	31.1963	32.8977	32.3066	35.8577	40.628	47.3053	66.5072	95.6542	114.042	123.984	129.308	130.442	125.143	123.788	121.579	115.967	108.552	105.115	99.6535
	21.7607	10.944	10.663	10.9186	13.8686	15.3912	14.9508	14.8029	14.8997	14.9719	15.4403	15.2323	15.0765	15.8597	16.0425	15.9327	15.5068	15.3982	16.4536	16.4187	17.638	17.4163	17.2951	17.3145	17.1805	18.2967	18.057	18.2705	17.6758	18.9958	20.5406	22.5737	29.1012	40.1574	60.3953	80.3873	98.3291	108.314	114.296	116.086	115.501	114.882	111.386	109.794	107.367	101.715	97.7331	93.762	89.8397
	31.3861	21.4623	20.3553	21.0393	23.921	25.5864	25.3478	25.3037	25.5308	25.8477	26.0605	25.6049	25.0556	26.0497	25.7462	26.2155	25.2099	26.0632	26.7446	26.077	26.9525	26.593	26.8262	26.2846	26.9903	26.9197	27.4212	27.991	27.3536	28.8733	29.3451	31.108	31.9805	36.977	40.784	49.143	63.7393	80.2804	95.2005	101.948	107.206	107.68	106.9	105.757	103.031	98.7316	93.6333	87.9247	83.7372
	55.9521	44.2376	43.4678	44.3674	48.4182	49.9289	48.7889	49.3359	49.6657	49.3267	49.0666	49.5722	49.4574	49.4508	50.3158	49.4566	50.1989	49.1672	51.0855	50.6968	51.1515	51.0929	51.5382	52.0487	51.8606	52.446	51.3885	51.7096	51.3859	53.455	54.6526	55.5269	58.5904	62.6789	67.5814	76.6128	93.2526	110.287	126.491	132.967	137.99	139.335	137.788	138.599	132.707	128.454	119.453	114.594	110.435
	26.1622	15.2527	15.1924	14.7964	18.3926	19.7593	19.1099	19.4015	19.107	19.1466	18.7582	18.708	18.8788	18.6519	19.5814	18.7396	19.0555	18.607	20.2023	19.0287	19.9991	20.7778	20.6963	20.0618	20.2885	20.4479	19.9822	19.83	19.783	21.0055	21.7649	22.8424	25.6537	31.8614	41.7775	61.6121	89.9587	114.95	130.102	134.143	134.333	130.009	129.874	129.389	125.551	120.144	114.651	110.595	106.307
	34	22.2482	22.7281	22.7742	25.9724	27.2517	27.3487	26.6279	27.4346	27.9087	27.2362	27.1644	27.1838	27.3778	27.8633	27.5767	27.7552	27.1759	28.6552	27.8741	29.0884	29.2957	29.6034	29.1805	30.5118	28.4632	28.5107	28.9448	28.5136	30.1506	30.2395	32.143	33.9948	37.568	44.5861	74.4217	114.31	147.755	164.691	171.425	167.437	162.687	159.454	157.549	153.47	145.163	135.381	131.523	127.985
	14.3548	4.26696	3.88311	3.70335	6.34256	7.393	7.32732	7.37267	7.38434	7.15935	7.16783	6.72831	6.94567	7.12571	7.27079	7.4757	7.40153	7.53761	8.64682	7.57708	8.72204	9.09053	9.6008	8.80941	9.17159	9.66906	9.43474	10.976	13.3811	23.6709	40.9517	65.3236	88.1161	104.67	110.389	110.833	113.029	112.962	112.675	111.003	109.855	108.21	105.459	103.276	99.1543	93.8652	91.414	87.4395	84.4817
	22.7332	11.4416	10.5581	10.7178	13.3179	14.2522	14.1498	13.93	14.072	14.0824	13.4965	13.7562	13.8041	14.2172	14.56	14.6892	14.3164	14.7906	15.3447	15.0514	15.4771	15.9531	15.727	15.7361	16.0172	16.641	17.4228	23.8367	23.7815	24.1458	25.1089	25.9191	26.2247	27.412	27.9524	28.8833	28.8743	29.8343	30.085	29.1608	29.5122	29.7261	29.1369	29.3679	28.6186	26.8746	26.3652	25.2543	24.0596
	35.0055	22.3149	21.4949	21.5987	24.7497	26.2449	25.6201	25.3111	25.4543	25.265	25.0171	24.8466	24.8513	24.9027	25.2804	25.2859	24.9482	24.8345	25.4904	25.0412	26.1597	26.1142	26.0727	25.7384	26.357	29.1035	35.9074	46.3965	86.269	94.933	83.0279	77.6427	72.798	78.0429	79.855	80.2512	78.6614	78.4748	80.3209	79.572	78.8772	78.7793	77.494	78.4098	79.1049	75.6896	73.1819	74.1145	71.6895
	19.7657	8.66552	8.22295	8.45139	11.5052	12.8812	12.2179	12.1967	12.7098	12.8541	12.1831	12.5618	12.2613	13.1032	13.4177	12.7083	13.0086	12.2936	13.5665	13.2823	14.1057	14.0223	13.9844	13.9297	14.2332	14.64	14.7573	16.1726	17.1653	24.5514	41.4359	78.3458	93.8728	105.953	109.324	108.978	110.719	112.011	111.833	108.501	105.994	104.162	101.639	99.3107	95.9907	92.4158	89.4802	86.2013	81.5342
	11.5079	1.11631	0.683047	0.451217	3.41642	4.41644	3.92002	4.32852	4.02789	4.08199	4.16357	4.30814	4.18013	4.81939	4.88278	4.51955	5.00839	4.96707	5.65058	4.97505	5.63215	5.71833	6.1252	6.18008	6.81826	6.6961	6.12632	6.99571	6.68835	8.17644	10.8283	14.4624	15.4065	17.067	17.225	17.7681	18.671	19.2982	19.8546	20.1952	19.8727	19.8149	18.9791	19.6899	19.1509	18.5114	18.066	17.3012	16.4897
Time (s)	0	2	4	6	8	10	12	14	16	18	20	22	24	26	28	30	32	34	36	38	40	42	44	46	48	50	52	54	56	58	60	62	64	66	68	70	72	74	76	78	80	82	84	86	88	90	92	94	96
[truncated: 126 more columns]

## Sheet: Panel K
IP3R1 shRNA	19.9863	15.9958	16.0398	15.3555	15.3757	14.0589	13.8842	13.6145	13.5398	13.8037	12.4354	13.5066	14.492	13.7651	13.5855	11.8233	10.8328	10.9862	12.1111	12.7585	12.5473	13.0388	13.8364	12.9865	13.0075	15.9447	16.0669	14.2949	12.2011	13.3428	12.5654	12.859	12.4823	11.7966	11.3661	10.7577	11.0697	11.2805	10.8689	11.497	11.1501	10.711	10.8616	10.8369	11.2435	11.9988	11.1708	11.7557	11.9361
	37.3816	32.8219	32.919	32.5154	32.4246	30.9222	30.846	30.0697	30.1498	30.5904	29.7812	30.6715	31.5665	31.1323	30.544	28.5789	27.7844	27.7617	28.5271	28.9085	28.6186	29.4689	29.9218	29.5348	29.7945	32.0792	31.2611	29.952	28.2124	29.4816	28.5326	28.3338	28.2472	27.5549	26.7905	26.5501	27.3982	26.8463	26.8062	27.1694	27.576	26.5888	26.9399	26.6217	27.2676	27.568	27.2949	27.4937	28.3603
	21.8577	18.2585	18.0842	17.4964	17.8628	16.1273	15.643	14.8855	15.2093	15.4802	14.3491	15.2893	16.0681	15.8375	15.3381	13.5245	12.4069	12.7216	13.5253	13.9577	13.477	14.0173	14.972	14.2325	14.6865	17.6235	17.4167	15.9239	14.2862	14.9878	14.1694	14.3525	13.989	13.587	12.4886	12.0625	12.4419	12.8682	12.1212	12.9627	12.5923	12.5671	12.4113	12.3895	12.8184	13.3113	13.0733	13.2792	13.3742
	31.4642	27.5551	27.5173	26.9915	26.4391	25.3695	25.056	24.5689	24.6186	24.9808	23.7509	25.1297	25.8696	25.5293	24.9774	23.2428	22.5064	22.2271	22.8931	24.052	23.837	24.309	25.0615	24.3159	24.7386	27.2995	27.4056	26.0708	24.1099	25.0341	23.9482	24.1133	23.8596	23.3061	22.9334	22.1065	22.7408	23.3451	23.0411	23.3053	23.3212	23.56	23.2357	23.5644	24.6267	24.9792	24.4694	24.9544	24.8608
	40.9534	36.8882	36.8937	35.9764	35.9096	34.6787	34.3129	33.8446	33.6071	33.9569	33.1244	33.8503	34.9755	34.3773	33.8901	32.5354	31.6047	31.514	32.5516	33.0654	33.0147	33.5605	34.3631	33.3367	33.9306	37.2261	36.5001	34.8334	33.2264	34.2842	33.0919	33.7057	33.3526	32.6565	31.8709	31.4977	32.1136	32.1223	31.7495	32.2234	32.1378	31.9226	32.0957	32.1554	32.9173	33.482	32.6523	33.1436	33.765
	32.6989	28.4999	28.7468	28.3389	27.819	26.5508	26.5375	26.1809	26.4551	26.9032	25.3535	26.7459	27.5522	26.8375	26.2105	24.719	23.9592	24.1225	24.8545	25.1625	24.9096	25.7508	26.533	25.417	25.6616	28.3552	28.4938	26.8252	24.7271	26.4317	24.7563	25.2531	24.813	24.204	23.5059	23.2346	23.5446	24.0177	22.9347	23.8225	23.9574	23.7115	23.4781	23.167	24.454	24.3815	23.8517	24.8357	24.6286
	37.7761	34.1541	33.8648	33.6862	33.5932	31.8707	32.4077	31.8088	31.8035	32.1744	30.9148	31.7364	32.1223	31.9856	31.621	29.7494	29.2959	28.9199	29.6193	31.2842	31.0988	31.7636	32.3891	31.499	32.0851	34.8309	34.4352	32.8792	31.2517	32.0974	31.0653	31.1641	31.2856	30.617	29.8861	29.3961	30.0534	29.9482	29.413	30.209	29.5427	29.6271	29.5971	29.0896	30.3084	31.2424	30.6137	31.0973	31.0364
	36.0526	31.7675	31.7414	30.8339	31.0872	29.5345	29.1402	28.4092	28.7543	29.2142	27.8553	29.219	29.7451	29.4457	28.7699	26.933	26.3621	26.099	27.1027	28.1505	28.0033	28.6723	29.5363	28.3018	28.6967	31.8739	31.6023	29.6271	28.1973	29.249	28.1799	28.1164	27.7574	27.2402	26.7815	25.9391	26.6007	26.9135	26.3885	26.683	26.6689	26.1611	26.2409	25.9779	26.8389	27.6112	26.9336	27.5183	27.758
	35.1266	31.0405	31.0066	30.0153	30.2526	28.9766	28.5291	27.9346	27.6478	28.5745	27.0623	27.8114	28.917	28.3108	28.1675	26.1539	25.2736	25.2749	25.7795	26.698	26.8753	27.4883	28.2517	27.8126	28.0366	31.282	31.1117	29.6253	27.4825	28.7779	27.8312	27.7138	27.2766	27.1762	26.269	25.6783	25.8303	26.1349	25.5409	25.7013	26.1439	25.7335	25.3966	25.4619	26.4631	27.1371	26.8076	26.8918	27.0617
	29.4118	25.7455	25.3931	24.716	25.1911	23.5485	22.9974	22.4787	22.2328	22.9948	21.9149	22.2557	23.3484	23.2637	22.7833	20.7546	20.2341	19.7978	20.9367	20.9046	20.7964	21.0101	21.8322	21.1336	21.202	24.0401	23.2767	21.9729	20.2262	21.7374	20.3743	20.4858	19.9616	19.3633	19.064	17.993	18.7245	18.72	18.1685	18.9533	18.7883	18.3403	18.3806	18.2407	19.0977	19.4971	19.067	19.3765	19.628
	59.2051	55.3188	55.6166	54.7886	54.5269	53.5164	53.445	53.691	54.0746	54.2473	53.1023	54.3162	55.1328	54.624	53.9549	52.1462	51.5132	51.1351	52.2698	54.6354	54.9344	55.2399	55.7202	55.0544	55.5188	57.9816	57.6139	55.9064	53.8191	55.6282	54.6279	54.4234	53.86	53.3873	52.5683	52.3736	52.9197	52.9958	53.4058	53.6009	53.3088	53.1639	52.986	52.7718	53.8142	54.5395	54.0272	54.1672	54.9186
	34.0618	30.3822	30.241	30.078	29.4395	28.7217	28.4046	28.1321	27.8669	28.1862	26.6933	28.5421	28.5277	28.4404	27.652	26.293	25.6048	25.0857	26.0745	26.6982	26.8415	27.1917	27.7871	26.6745	27.5072	30.5069	30.1838	28.7178	26.9206	28.1529	27.121	27.4317	26.5047	26.2546	25.2596	25.2912	25.7899	26.0011	25.4538	26.028	25.5473	25.4052	25.0768	24.9711	25.8569	26.3305	26.0796	26.0317	26.4584
	28.3071	24.436	24.4069	23.5293	23.9119	22.2517	21.6012	21.6603	21.7065	22.0425	20.877	21.6071	22.3686	21.8949	21.4051	19.5488	18.7616	18.6002	19.6615	20.3018	20.2668	20.6812	21.3275	20.6849	20.805	23.9397	23.9424	22.4775	20.6551	21.5617	20.2851	20.847	20.6541	19.9439	19.0892	18.8738	18.9525	19.4072	18.6679	19.2193	19.325	18.8892	18.7767	18.3852	19.0572	19.3846	19.2002	19.4803	20.0148
	29.3259	25.1481	25.0922	24.7217	24.6041	23.4088	22.5041	22.8503	23.1215	22.8365	21.9193	23.174	23.8926	23.354	22.9947	21.0213	20.1485	20.5227	21.0748	22.0025	22.1256	22.4652	23.2926	22.491	22.3155	26.0829	25.5419	24.3516	21.9761	23.1929	21.9967	22.3523	22.0718	21.3754	20.7162	20.5264	21.0492	21.1091	20.4317	21.0091	21.0806	20.7795	20.6253	20.1989	21.5406	21.9152	21.2886	21.9026	22.2458
	65.4947	61.9446	61.4333	61.0816	60.6854	59.2298	59.206	59.6411	59.3625	59.6895	58.664	59.1464	60.2807	59.4387	58.9528	57.2979	56.0349	55.9405	56.9745	57.8843	58.1361	58.7755	59.2968	58.4871	58.8859	61.3167	61.5432	60.0153	57.7459	59.0767	58.3153	58.6355	58.4578	57.4873	57.2308	57.1335	57.9535	57.3306	57.4512	57.8679	57.2069	56.9454	56.7875	56.7684	57.6261	58.3988	57.6046	58.6343	58.6473
	31.3434	27.5316	27.4153	26.4257	26.4902	25.2082	25.0215	24.6521	24.5769	25.1546	23.9688	24.9197	25.8049	25.0871	24.8831	23.0889	21.7279	21.7654	23.1537	24.2844	24.8227	24.8348	25.7203	24.8976	25.0224	28.0025	28.0859	26.2994	24.3708	25.5847	24.7384	24.6608	24.4706	23.7296	23.0085	22.4719	22.8224	23.5198	22.924	23.3807	23.3394	22.9401	22.5998	22.7662	23.8468	24.3689	24.0267	23.6393	24.6001
	36.8239	32.7992	32.9732	32.3289	31.8489	30.6893	30.3675	30.1079	30.6648	30.5854	29.3376	30.4675	31.3338	30.6189	30.2616	28.7085	27.6259	27.4786	28.5577	29.8749	30.1957	30.4267	31.1694	30.3587	30.7917	33.9742	33.8638	32.0374	29.9812	31.3651	29.7741	30.1143	30.0542	29.5734	28.4402	28.2801	28.4913	28.9428	28.4912	29.1832	28.9327	28.5393	28.5644	28.8079	29.2663	29.9512	29.1066	29.6749	30.0876
	42.0722	38.4934	38.6346	37.5118	37.4496	36.5653	36.2827	35.9601	35.6331	35.911	34.7923	35.8074	37.1623	36.4184	35.5327	33.6277	33.4968	33.0935	33.9071	34.9879	34.568	35.1399	35.8204	35.2514	35.7632	38.2289	37.8382	36.7031	34.3391	35.363	34.4501	34.969	34.6227	33.4606	32.9105	32.3876	33.0371	32.9936	32.5116	32.7709	33.1901	32.9965	32.8117	32.4546	33.2366	33.6508	33.5311	33.5516	33.9544
	59.1807	55.6499	55.0452	54.6905	54.7095	53.1229	52.7505	52.9073	53.0607	52.6219	51.2989	52.886	53.8958	53.4266	52.4902	50.7579	49.6648	49.1901	50.432	51.5605	50.8298	51.6892	52.059	51.2488	51.5079	55.015	54.39	52.7759	50.4712	51.8573	50.8729	50.828	50.0846	49.8358	48.7937	48.0219	48.9969	49.4131	48.4694	49.2392	49.1892	48.6	48.6952	48.2169	48.9394	49.6553	49.5655	49.2633	49.8864
	33.2334	29.7736	29.517	29.0394	29.4283	27.8609	27.3741	27.6995	28.1601	28.0723	26.9601	27.8705	28.8789	28.2204	27.732	26.2053	25.5628	25.2408	26.2379	27.6472	27.414	28.1817	28.9821	28.3472	28.3922	31.2844	31.3054	29.336	27.168	28.5878	27.4022	27.5783	27.2033	26.7795	25.906	25.6891	26.0617	26.3905	25.6892	26.4652	26.1225	26.1403	26.1926	25.6205	26.3884	27.0468	26.4532	27.2399	27.5134
	42.0667	38.1919	38.1271	37.2255	37.1263	35.4992	35.6778	35.1966	34.8303	35.2511	34.2533	35.2435	35.7041	35.5464	34.8972	32.9911	32.3486	31.871	33.1946	33.3795	33.9466	34.3411	35.3454	34.5834	35.1657	39.7624	39.3617	37.3158	35.629	36.3428	34.6828	35.1078	34.5396	33.8591	33.2452	32.8242	33.1622	33.2789	32.8273	33.4285	33.242	32.2767	32.498	31.9377	32.8649	34.0252	33.35	33.6743	33.9509
	41.4397	37.9086	37.6472	36.4797	36.6333	35.4716	35.117	34.7232	35.1019	35.804	34.2647	35.44	36.3024	35.4782	35.1336	33.2628	32.6737	32.5497	33.662	34.0557	34.0257	35.0706	35.8517	34.8644	35.3523	38.2506	37.9279	36.2994	34.3069	35.4062	34.1115	34.5618	34.403	33.2253	32.6752	32.3393	33.0097	33.0981	32.9881	33.131	32.9102	32.6583	33.1741	32.4556	33.397	33.6951	33.1369	33.5707	34.2781
	24.4585	25.22	25.676	25.3018	25.403	25.8618	26.2051	26.8812	26.511	26.6229	27.2586	28.1455	28.1261	28.521	28.878	28.8128	29.1959	30.0901	30.0327	30.6502	30.3525	30.3137	30.9399	30.8561	30.7658	31.4726	30.3668	30.6116	30.6687	31.6117	32.0306	32.0586	32.5903	33.0218	32.8639	32.9745	32.8915	33.7242	32.7771	33.4168	32.7479	33.2087	34.2406	33.9239	34.9613	35.5745	35.3789	35.1186	35.8037
	18.7359	19.0648	19.2152	19.4026	19.4357	20.1473	20.5483	21.0872	21.0275	21.2726	21.5792	22.017	22.4138	22.9037	22.9522	23.2281	23.4571	24.2319	23.735	24.4697	24.3789	24.2914	24.7556	24.9404	25.0372	25.3411	24.4295	24.568	25.1476	26.1646	26.0256	26.3002	26.9338	27.2635	27.4401	27.1352	27.1915	27.7945	27.4155	27.5948	27.5583	27.6502	28.6636	27.9641	29.4117	29.9294	29.5913	29.8714	30.094
	16.3261	16.5348	17.0245	17.1414	17.1574	17.5104	18.1054	18.5802	18.6503	18.3991	18.9592	19.854	19.8415	20.0329	20.2074	20.3853	20.7015	21.222	21.0503	21.6873	21.6898	21.5771	21.945	22.3664	22.1912	22.5625	21.5635	22.2161	22.4986	23.1889	23.3795	23.6361	23.9218	24.4875	24.6011	24.6295	24.5503	24.9746	24.6179	25.0626	24.7066	24.9559	25.7951	25.5668	26.2276	26.9008	26.8755	26.4584	27.3456
	18.2556	18.5842	18.9829	18.6498	18.8703	18.8882	19.6027	20.0579	19.9059	20.3131	20.3767	21.322	21.2219	21.9015	21.7463	21.747	22.2381	23.1161	22.7991	23.3123	22.8458	23.2175	23.3407	23.5392	24.0068	24.0668	22.9414	23.3731	23.7156	24.4667	24.6345	24.7679	25.5773	25.5661	25.8289	25.7938	25.8273	26.8127	26.2043	26.4893	26.2319	26.2066	27.4196	27.6185	28.1763	28.5598	28.8955	28.3412	29.0581
	28.8903	29.802	30.0527	30.0026	30.3014	30.6025	31.0111	31.5545	31.5922	31.6756	32.3916	32.7569	32.9125	33.4485	33.44	33.8276	34.021	34.8649	34.741	35.1764	35.0523	35.2339	35.6424	35.5016	35.6189	36.1662	35.6378	35.4309	36.3812	36.9535	37.1247	37.143	37.8135	38.2239	38.5874	38.6366	38.3251	39.3932	38.8477	39.1765	38.8676	39.0816	40.314	39.8811	41.4137	41.91	41.7332	42.1446	42.7622
	21.3807	22.2898	21.8357	22.4338	22.1406	22.9519	23.1472	24.0161	24.0844	24.2357	24.3867	25.4751	25.5149	25.8561	26.0348	26.1659	26.508	27.3729	26.9321	27.5871	27.6302	27.7367	27.8371	28.2916	28.2314	29.0606	27.7284	27.8834	28.7843	29.6198	29.5272	29.8405	30.7703	31.3152	31.1221	31.1836	31.1882	31.7584	31.3661	31.3647	31.5038	31.5421	33.1038	32.3634	33.5261	34.5056	34.1643	34.2796	34.5924
	21.7429	22.2389	22.4884	22.533	22.7542	23.0617	23.4681	24.119	24.087	24.2099	24.6693	25.4154	25.6309	25.8364	25.961	25.9756	26.1498	27.3873	27.2672	27.8101	27.6717	27.2709	28.0195	28.0929	28.4369	28.6234	27.9523	27.9908	28.8533	29.2933	29.6951	29.767	30.0227	30.6237	31.0053	30.7914	31.0833	31.6662	31.0157	31.3963	31.4539	31.5023	32.6195	32.2975	33.464	34.2295	34.1116	33.8976	34.7093
	18.4105	18.8559	19.146	19.043	19.2269	19.7038	20.113	20.7741	20.6368	20.6558	21.1893	21.7147	22.0636	22.3477	22.5933	22.5929	22.9333	24.0446	23.5768	24.5883	24.1278	24.3308	24.5175	24.7372	25.0552	25.4514	24.0124	24.5961	25.1662	25.4621	25.7206	26.0159	26.806	27.4167	27.2844	27.341	27.5584	28.3705	27.6724	28.1531	28.3961	28.2113	29.3491	29.2125	30.6859	30.963	30.7834	30.9706	31.9682
	29.0771	29.7416	29.9492	29.5013	29.5041	30.2069	30.8696	31.4771	31.5022	31.3168	32.036	32.1535	32.4165	33.0415	32.5968	32.9748	33.5322	34.38	34.2574	35.1019	34.4491	35.0619	35.0265	35.313	35.5615	35.7983	35.3828	35.359	35.693	36.0638	36.1104	36.6026	37.5325	37.9642	38.2523	38.3255	38.1078	38.6562	38.5634	38.2464	38.1835	39.1394	40.4198	40.0243	40.6615	41.5895	40.8408	40.7911	42.2565
	28.943	29.2622	29.6802	29.5432	29.5514	30.3153	30.912	31.4057	31.7872	31.4047	31.9146	32.6886	32.9461	32.9751	33.3463	33.5556	33.5713	34.9123	34.536	35.2724	35.3729	35.0446	35.0651	35.3512	35.8998	36.2598	35.202	35.7619	36.1367	36.8177	37.492	37.2483	38.115	38.6864	39.2207	39.1854	39.3375	40.2445	39.5609	40.076	40.0191	40.0759	41.7947	41.6362	43.6426	44.1872	44.4908	44.7299	45.8193
	16.1094	16.427	16.6424	16.6947	16.6412	17.1772	17.4838	18.0115	18.1596	18.2746	18.8394	19.434	19.6179	20.0244	20.1988	20.6106	20.4351	21.5074	21.3377	21.6717	21.3963	21.7808	22.1336	22.4768	22.4425	23.4314	22.365	22.6982	23.4113	23.9323	23.9188	24.2296	25.1535	25.6288	25.968	26.0059	26.1033	26.603	26.1561	26.693	26.8679	26.6908	27.9354	27.8303	29.1374	29.5816	29.5971	29.8042	30.3715
	18.6906	19.0849	19.5663	19.0128	19.4221	19.9243	20.487	20.9388	21.1106	21.1661	21.4685	21.9672	22.2008	22.431	22.7894	22.9332	23.2098	23.8911	23.7455	24.4239	24.2401	24.0741	24.732	24.6333	24.7272	25.2641	24.1721	24.6564	24.6773	25.5272	26.0056	26.1386	26.8104	27.1382	27.4145	27.4328	27.4455	28.3658	27.6394	27.9265	27.8658	28.1097	28.9622	29.1581	30.2309	30.5716	30.8589	30.9943	31.7857
	27.2178	27.8227	27.8995	27.8093	27.8346	28.165	28.6352	28.9717	29.3827	29.1964	29.5849	30.3892	30.4839	30.7232	31.2519	30.8903	31.1693	32.0455	31.482	32.3283	32.1003	32.3014	32.7067	32.6623	33.0128	33.5877	32.7978	32.9825	33.1346	33.8674	34.525	34.1897	34.968	35.946	36.3016	36.1146	36.1421	36.8056	36.7666	37.0906	36.9346	37.5097	38.509	38.6343	40.1849	41.025	40.8081	41.0914	42.0302
	16.8864	17.0467	17.4383	17.4657	17.5552	17.8851	18.5301	18.7079	19.1072	19.0328	19.3732	20.0792	20.3357	20.3096	20.327	20.9119	20.8882	21.6607	21.3615	22.1392	21.9093	21.7661	22.0452	22.1449	22.6448	23.3342	22.2447	22.9489	22.7409	23.901	24.0491	24.5425	25.1338	25.5614	26.0203	25.5029	25.9096	26.3491	25.9916	26.513	26.4381	27.03	28.004	28.231	29.8933	30.2744	30.6711	31.0228	32.0712
	15.2942	15.475	15.6997	15.6009	15.773	16.2489	16.6611	16.9473	17.0235	17.0679	17.5567	18.0803	18.1712	18.3961	18.907	18.6811	19.0204	19.5629	19.5225	20.1067	19.8681	20.0009	20.4284	20.6527	20.4844	20.6093	19.8391	20.5208	20.6165	21.295	21.298	21.8371	22.1497	22.9859	22.8608	22.9453	23.0507	23.8204	23.4491	23.5011	23.8611	23.8179	25.353	24.7172	26.115	26.6149	26.922	26.867	27.3378
	10.9845	11.3343	11.6574	11.6418	11.8249	12.392	12.6172	13.1819	13.3257	13.3847	13.7198	14.4532	14.3433	14.4759	14.9238	14.9961	15.2867	15.9285	15.9064	16.3633	16.1562	16.227	16.3239	16.7365	16.7027	16.9458	16.1082	16.5743	16.8416	17.4559	17.7085	17.6955	18.3663	18.6989	19.1114	18.7106	18.8936	19.5712	19.119	19.3108	19.3122	19.5965	20.4176	20.2317	21.3453	21.6172	21.7669	21.6477	22.1895
	17.7523	18.4216	18.7395	18.1669	18.4298	18.9431	19.3732	19.8474	19.8929	20.1936	20.3873	21.0848	21.2616	22.0271	22.0334	22.0908	22.1379	23.0269	23.0629	23.3812	23.1736	23.4248	23.7077	23.979	23.9909	24.361	23.5493	23.5286	24.5231	24.8219	24.9144	25.4612	26.2371	26.729	26.9729	26.8641	26.741	27.6591	27.3919	28.0753	27.8005	27.858	29.1141	29.0878	29.903	31.1376	30.7388	31.2062	31.7352
	40.1826	40.9246	41.3947	41.2278	41.3586	42.0732	42.693	43.1403	43.2888	43.3097	43.9676	44.4366	44.5825	45.3961	45.7629	45.3048	45.4037	46.2351	45.4641	46.7338	46.2212	46.4006	46.4333	46.6431	47.2727	47.3659	45.8994	46.2431	46.8701	46.7045	47.5239	47.409	48.6834	49.0702	49.4836	49.4878	49.7663	50.8921	50.2923	51.1555	50.9372	50.5131	52.2163	52.2388	53.6228	54.9281	55.6183	55.4436	56.8044
	25.6359	26.4601	26.698	26.409	26.7006	26.8097	27.4388	28.2084	28.0997	28.2402	28.1925	29.2368	29.47	29.7102	30.3798	30.1585	30.1765	31.3046	31.1314	31.6805	31.3976	31.1521	31.5555	32.1141	32.1466	32.6051	31.7046	31.8355	32.3146	33.0198	33.5062	33.7845	34.4365	34.792	35.0833	35.377	35.2735	36.2114	35.9829	36.3218	36.1268	36.6731	37.8547	37.5469	39.4602	40.359	40.3873	40.438	41.3664
	15.3218	15.7354	15.6706	15.785	15.9822	16.4818	16.7501	17.5162	17.6435	17.6296	17.7789	18.4896	18.6442	19.1665	19.3307	19.4007	19.497	20.5276	20.2388	20.7697	20.9462	20.8327	21.0095	21.228	21.1761	21.6607	20.8544	21.1055	21.692	22.3294	22.3158	22.35	23.2463	23.5688	24.0956	23.9204	23.8393	24.5132	24.3284	24.5385	24.3766	24.8525	25.8861	25.5785	26.8472	27.5186	27.4438	27.7331	28.1325
	16.1975	16.6158	16.9841	16.8319	16.9938	17.0786	17.5844	18.3498	18.5643	18.6723	18.9323	19.3347	19.6764	20.0473	20.0147	20.3311	20.3516	21.2838	21.4084	21.8224	21.586	21.3468	22.0065	22.3488	22.0104	22.5405	21.5312	21.8947	22.0986	22.9568	22.909	23.2207	23.7393	24.396	24.4968	24.2765	24.5407	25.1348	24.7261	25.0111	25.0704	25.2383	25.7957	26.0032	26.8514	27.6005	27.4189	27.4366	27.9562
	19.7164	19.9975	20.1123	20.2542	20.0917	20.7618	21.2719	21.6529	21.8172	22.1234	22.4267	23.1881	23.1191	23.2028	23.5793	23.8822	23.8108	24.555	24.4255	24.9882	24.9231	24.7771	25.3765	25.3735	25.346	25.9432	25.2141	25.4289	25.7887	26.7381	26.6167	27.3357	27.5739	28.2196	28.5108	28.471	28.2455	29.4078	29.3778	29.5038	29.6521	29.9401	31.3131	30.9165	32.2341	33.2832	33.3769	33.5813	34.367
	18.4937	18.7585	18.9931	18.9435	19.1428	19.3925	19.9557	20.4623	20.4526	20.8055	20.8984	21.8025	21.4971	21.9015	22.4184	22.3555	22.4457	23.3768	23.1539	23.934	23.6017	23.5585	23.8791	24.2462	24.1029	24.792	23.6906	24.14	24.7168	25.1853	25.5592	26.0242	26.4263	27.1192	27.3203	27.1729	27.4987	28.088	27.8363	28.3693	28.4976	28.764	29.7975	29.5552	31.0784	31.8844	31.7294	32.1693	32.6851
	19.4563	20.0124	20.1014	20.3848	20.1409	20.5374	21.2194	22.0324	21.8949	21.9012	22.1757	22.9314	22.8452	22.9865	23.5866	23.6583	23.8124	24.8086	24.5804	24.8336	24.917	24.5696	25.0671	25.406	25.4024	25.9739	24.7762	24.9903	25.6999	26.2395	26.4017	26.7117	27.1978	27.3994	28.0141	27.9309	27.9125	28.811	28.7234	28.854	28.8051	29.2325	30.2646	30.1742	31.5803	32.5542	32.7442	32.6839	33.5522
	17.5978	17.9409	18.7458	18.3527	18.7043	19.149	19.7715	20.0759	20.326	20.2381	20.715	21.4672	21.7741	22.2194	22.7722	23.3194	23.0045	23.7448	23.4336	24.125	23.8387	23.995	23.7651	24.206	23.9597	24.6572	23.7797	23.9911	24.3695	25.2084	25.4436	25.8051	26.2196	26.9547	26.8945	27.1456	27.1691	28.0008	27.0184	28.0727	27.6002	28.029	29.081	28.9513	30.1863	31.142	30.8418	30.9173	31.9119
	22.797	23.0562	23.8143	23.5691	24.0485	24.4306	24.9642	25.3346	25.4048	24.9436	25.4846	26.6782	26.8074	27.2023	27.7236	27.5763	27.2917	28.371	28.176	28.756	28.6093	28.7482	28.9895	29.1125	29.0934	30.1676	29.1436	29.2659	30.1918	31.171	31.1938	31.5152	32.2171	32.3773	32.9795	32.313	32.8116	33.6127	32.9219	33.0805	33.3017	33.4236	34.757	34.6301	35.9418	36.702	37.1348	37.2048	38.0302
	17.6175	18.2201	18.6811	18.63	18.6278	19.1418	19.9755	20.2098	20.3575	20.7645	20.7555	21.3071	21.3824	21.9273	22.1373	22.1548	22.4597	23.1585	23.2832	23.5034	23.4766	23.4515	23.9275	23.8849	24.1255	24.4899	23.6993	24.2203	24.9077	25.3524	25.6695	26.2779	26.9052	27.5903	27.7731	27.4071	27.5538	27.9326	27.611	27.4452	27.0875	27.6991	28.4536	28.2688	29.3024	29.9936	29.9677	29.9319	30.7406
	14.9956	15.5167	16.0338	15.6121	15.7139	16.0768	16.6146	16.9801	17.5378	17.2044	17.8281	18.3912	18.5416	18.6932	19.2736	19.3154	19.1214	19.9474	20.3475	20.82	20.3416	20.2891	20.3653	20.8499	20.9756	21.6341	20.2438	20.6471	21.3987	21.7137	21.8482	21.7144	22.7105	23.3116	23.4003	22.9673	23.2362	24.2956	24.082	23.704	23.7463	23.8277	24.76	24.8014	25.8063	26.9104	26.8388	26.3697	27.1872
	20.2593	21.0452	20.9452	20.6809	20.8737	21.3411	22.0786	22.7897	22.964	22.7193	23.2036	23.752	24.1222	24.8181	24.6125	24.5319	24.6329	25.5638	25.7685	26.1154	26.0534	26.268	26.4135	26.292	26.5554	27.3047	26.0885	26.1738	26.9132	27.4962	27.893	27.9145	28.6877	28.7461	29.3224	29.0947	29.3447	30.144	29.7155	30.3982	30.0543	29.7576	31.072	31.1678	32.0356	32.4458	32.5738	33.0414	33.8186
	18.966	19.7299	19.8202	19.8497	19.9485	20.3907	20.9527	21.705	21.8011	21.5309	22.0899	23.0112	22.7221	23.3775	23.6809	23.8201	24.037	25.0173	25.1016	25.5992	25.3137	25.4121	25.8322	25.7653	25.8742	26.8279	25.7638	25.9879	26.9786	27.5099	27.8776	27.8337	28.2726	28.6482	29.3162	28.9906	29.0425	30.1766	29.291	29.706	30.0074	29.7268	30.8026	30.9604	31.9956	32.8248	32.6355	32.9491	33.2307
	26.325	26.6599	27.0664	26.8875	27.1879	27.4169	28.2413	28.3912	28.6502	28.3707	28.9683	29.7317	29.7649	29.9139	30.3286	30.6277	30.4231	31.3758	31.497	31.8849	31.7244	31.5788	31.7916	32.1857	32.1873	32.5715	31.6595	31.8911	32.2177	32.8954	33.0818	33.3528	33.9904	34.3413	34.8551	34.496	34.5681	35.2733	34.7727	35.086	34.8298	35.5301	36.3224	36.2611	37.5112	37.9429	38.2315	37.9036	38.66
	19.9896	20.0175	19.9372	20.1496	20.2538	20.8209	21.1741	21.8574	22.128	22.6309	22.4669	23.2189	23.2441	23.9676	23.7229	24.0167	24.5663	24.9056	25.4449	25.6565	25.5041	25.5513	25.6912	25.7412	25.7976	26.5341	25.6064	26.254	26.431	27.1213	26.924	27.0727	27.8298	28.5031	28.2671	28.8087	28.8555	29.2273	28.8407	29.3049	29.1215	29.1917	30.1821	30.0877	31.1752	32.0953	32.2252	32.3106	32.9633
	18.3982	18.6837	19.0591	18.8906	19.1554	19.2908	19.7445	20.3892	20.4353	20.3238	21.0066	21.6095	22.0303	22.2808	22.4694	23.0108	22.7715	23.2606	23.5928	24.0841	24.083	23.9472	24.4026	24.424	24.5162	24.8942	24.1104	24.1104	24.7061	25.3735	25.5742	25.8706	26.5613	26.9798	27.0985	27.215	27.073	28.2461	27.5823	27.8697	27.6485	28.0335	29.4587	28.9383	30.289	30.9251	30.9844	31.3071	31.6415
	18.5165	18.9036	19.0951	19.0427	19.2879	19.4727	20.249	20.7247	20.7781	20.7537	21.0676	21.8315	21.5181	22.405	22.4448	22.7124	22.6372	23.7531	23.1584	23.9002	23.7063	24.0916	24.5068	24.3292	24.6712	25.0072	24.246	24.8863	24.9881	25.9318	26.3741	26.385	27.2484	27.9584	28.0294	27.7368	27.8494	28.7621	28.31	28.2534	28.7256	28.2887	30.0128	29.4871	31.2004	31.2475	31.5434	31.0989	32.1317
	102.414	84.9709	84.0812	84.8699	84.3338	84.7295	84.1627	84.5949	83.8852	84.2187	84.8102	85.4608	86.3808	86.2093	86.5051	85.6258	87.7324	87.2002	89.1508	88.6741	91.1901	90.8121	91.0189	93.1531	94.0523	95.3475	94.8516	96.4553	97.3478	97.6536	98.1186	98.2239	98.1197	98.6401	99.4049	100.451	101.529	100.874	102.795	102.435	102.191	104.013	103.737	102.973	104.925	105.148	106.333	107.37	107.726
	83.7916	65.9008	64.8658	64.4298	64.062	64.415	63.8257	63.6632	63.248	63.1446	63.3036	64.3432	64.4475	64.3451	64.1404	63.4494	64.9922	64.1363	64.6609	64.0133	65.3799	64.7841	65.2403	66.1598	66.9059	66.304	65.1572	66.3589	66.9429	66.8095	67.1958	67.0443	66.8362	67.1263	67.1604	68.2005	68.724	67.4347	68.5473	68.3042	68.497	69.2705	69.3446	68.2042	69.6949	69.6442	70.3607	70.7038	71.1018
	68.357	50.5872	49.4944	49.6478	49.4365	49.4222	49.1746	49.2029	48.6063	48.99	49.5013	49.4397	50.1596	49.9477	50.7215	50.0235	50.7806	50.4923	51.2251	50.8352	51.9439	51.2021	52.3237	53.4002	53.9424	53.0909	52.3875	53.6329	54.4141	54.8068	54.7381	55.1278	55.0074	55.1516	55.8554	56.7874	57.348	56.5991	57.5435	57.7556	57.7099	58.809	58.7279	57.9908	59.0234	59.7109	60.6976	61.5178	61.6523
	59.1351	41.843	41.3021	41.2405	40.7007	41.0096	40.6101	41.0358	40.6013	40.8593	41.4765	41.6768	42.3922	42.5415	42.3545	42.4739	43.1892	43.0149	43.5086	42.7642	44.4123	43.8545	44.7386	45.2475	46.3664	46.8366	45.5586	46.7065	47.0535	47.8733	47.6242	48.1771	47.5597	48.4757	49.263	49.4118	50.4269	49.434	50.181	50.0489	49.5228	50.5369	50.7865	49.286	50.0707	50.3314	50.9702	51.3205	50.9244
	49.5656	30.3861	29.7384	29.74	29.7276	29.4613	29.4542	29.0576	28.7523	28.8029	29.3581	29.4355	29.7819	29.556	29.9039	29.5557	30.297	30.2742	30.5531	30.6031	31.565	30.9438	31.6068	32.1201	32.6266	32.3056	31.4532	32.3525	33.0453	33.3015	32.8871	33.0918	33.1865	33.1623	33.688	34.3039	34.8242	33.9663	34.7374	34.6171	34.1396	35.0703	34.7799	34.1095	34.6348	34.6476	34.7752	35.5812	35.6338
	48.3504	31.3897	31.5864	30.8462	30.3619	30.4798	30.0022	30.3555	29.69	29.6628	29.5986	30.3312	30.9253	30.7774	30.9093	30.2069	31.1913	31.2693	32.0193	31.139	32.2297	31.7196	31.8261	32.7981	33.0928	32.2971	31.4004	32.4911	33.1031	33.5484	33.3431	33.2861	33.1793	33.0586	33.6098	34.5871	34.7092	33.8331	34.658	34.4773	33.5901	34.8739	34.2844	33.469	34.8446	34.6198	34.6864	35.1109	34.9454
	55.9225	38.7448	38.4331	38.5501	38.241	38.5234	38.0213	38.248	37.539	38.1296	38.3137	39.3505	39.7939	39.824	39.8068	39.5371	40.7594	39.9591	40.4752	40.4052	41.9707	41.5526	41.6765	42.7919	43.0934	43.2301	42.1444	42.9014	43.819	44.1755	44.5665	44.5153	44.165	45.106	45.1273	46.2115	46.9349	46.2599	47.0894	47.3912	46.789	47.8734	47.5859	46.4716	47.9295	47.9975	49.4401	49.5915	49.7162
	107.154	89.7256	88.9696	89.4624	88.9676	89.418	89.6058	89.2404	88.4651	89.1512	89.6834	91.1841	91.7826	92.3721	91.7598	91.8506	93.3867	92.2693	93.5102	92.6358	94.9759	94.4759	94.7178	96.1529	97.2154	97.2476	96.652	98.1469	99.4584	99.4342	100.19	101.776	101.788	103.29	103.947	105.919	108.263	109.331	111.795	112.423	112.88	116.662	117.246	117.481	120.241	121.312	124.317	126.695	128.555
	65.7314	47.2176	46.3594	46.37	45.7336	46.3844	46.1305	46.2623	45.7342	45.7791	46.2565	46.7548	47.1614	47.0558	47.3051	46.9179	48.2622	47.8182	48.356	47.972	49.3489	49.0499	49.5694	50.4934	51.1278	50.9195	50.4288	51.4349	52.041	52.9178	53.3681	53.6741	53.6971	54.6282	55.2884	56.529	57.7474	57.1216	58.7118	59.5417	59.6488	61.2275	61.6174	61.2819	62.7673	63.4386	64.7061	65.7391	66.0677
	71.6692	53.748	52.7887	52.9673	52.7154	52.9521	52.6833	53.8115	52.4862	52.7128	52.9299	53.4621	54.0193	53.5209	53.8317	53.2901	54.2471	53.7056	54.3825	53.8953	55.3768	54.7876	55.1725	57.35	57.6162	57.2366	56.2903	59.1769	62.8293	63.1465	64.3457	65.4039	66.2772	68.6071	70.4267	73.1626	75.3612	75.6303	80.0175	82.4032	84.0997	88.1393	91.7068	99.4497	105.926	113.75	117.879	121.921	126.156
	91.7843	74.3452	73.6791	73.4936	73.0852	73.3498	73.0816	73.1997	72.568	72.959	73.3558	73.955	74.2675	74.5223	74.3599	74.2737	75.7917	75.1306	75.8133	75.5349	77.5042	76.939	77.3172	78.8053	79.3262	79.0285	77.9329	79.5268	80.9285	81.1902	82.4545	82.7023	82.8694	84.4322	85.0018	87.21	88.1695	88.2944	89.7645	90.6934	91.3069	93.2375	94.6935	93.7399	96.4051	97.7525	99.442	100.67	101.621
	80.1231	62.2598	61.3799	61.9756	62.2273	62.3268	61.8383	61.6615	61.6865	61.9921	62.2541	63.1911	63.628	64.2257	63.938	63.3994	64.7795	64.3674	65.165	64.6791	66.1263	65.6989	66.3911	67.4994	68.1421	67.5146	66.7285	67.9898	69.6738	70.3809	71.0386	71.6023	71.8402	72.6864	74.0543	75.4646	76.9868	77.1869	78.6485	79.1951	79.3674	81.6677	82.7876	81.9799	84.3897	84.9086	86.1024	87.1465	88.1683
	44.7261	25.8629	25.4187	25.3399	24.6649	24.8814	24.6081	24.6694	24.1794	24.2966	24.9919	25.5987	25.7082	25.5146	25.6628	25.0707	26.2582	25.9119	26.3136	26.2407	27.5541	26.9306	27.4504	28.2149	28.0922	28.258	27.3542	28.4493	28.7328	29.2233	29.7058	29.6575	29.8815	30.2147	30.5267	31.342	31.828	31.1237	31.8338	32.5315	32.1871	33.2737	33.3186	32.739	33.9141	34.2582	35.2805	35.7813	35.6286
	39.8895	20.3733	20.2825	19.9443	19.7497	19.6228	19.4703	19.8719	19.3676	19.4991	19.8385	20.1925	20.4886	20.1387	20.348	20.3138	21.0899	21.0259	21.6617	21.3903	22.4961	22.1946	22.3239	23.0859	23.3819	23.105	22.5985	23.4938	24.1423	24.2894	24.56	24.2445	24.8673	24.9906	25.2991	26.1872	26.6915	26.1359	26.7188	27.1656	26.5225	27.752	27.3955	26.7095	27.265	27.4363	27.9206	28.3636	28.1636
	41.588	23.8003	23.5344	23.5982	22.936	22.7777	22.7684	23.6476	22.964	23.2089	23.3962	24.6938	24.4939	24.2633	24.4627	24.4011	25.767	25.0887	25.6766	25.8465	27.1089	26.9922	27.4302	28.2556	28.1788	28.5836	27.842	29.7753	29.8097	30.4232	30.6675	30.4401	30.7476	31.4251	31.6415	32.7078	33.1147	32.6295	33.8731	34.202	33.6215	35.6861	35.4164	34.9043	36.1116	35.839	36.3586	37.2859	36.8671
	57.5409	39.5227	39.1194	39.1776	38.9781	39.3726	39.2794	39.2634	38.8945	38.9389	39.5151	40.4967	40.9555	40.7199	40.8711	40.9483	41.6609	41.4933	42.1136	42.0927	43.245	43.0562	43.6125	44.6013	44.8556	45.1108	44.4354	45.6204	46.1263	46.7718	47.2793	47.3933	46.9628	48.0298	48.6239	49.3167	50.0999	49.7161	50.4523	50.7828	50.3051	51.8497	51.4957	50.674	52.0324	52.3485	52.7677	53.3416	53.0509
	57.2508	38.2901	37.8558	37.5494	37.4601	37.5902	37.243	37.3793	36.9186	37.1951	37.5481	38.1062	38.6028	38.3019	38.6586	38.6364	39.159	39.2189	39.2609	39.2945	40.8839	40.2782	40.7433	41.9084	41.9997	42.2802	41.3228	42.0749	42.9744	43.3651	43.4755	43.8593	43.9047	44.4869	45.0857	46.147	46.9218	46.135	47.6449	47.8046	47.4805	48.7523	48.947	48.5366	49.4637	49.6509	50.7446	51.1279	51.4195
	16.8374	14.6119	12.8863	13.762	13.9887	14.7614	14.1914	14.7823	14.5768	14.5083	14.6741	14.6341	15.3879	15.1287	14.3284	14.4595	15.2246	14.9396	16.4072	16.2807	16.8787	15.7814	15.5824	15.9768	17.6973	17.7664	18.2464	18.7646	20.1462	20.9997	21.761	23.1263	23.7012	24.1946	24.9889	26.3574	26.6822	27.5504	27.8043	28.935	29.336	30.4612	30.3957	31.3058	32.5705	33.4581	33.2598	33.0611	35.1587
	6.94483	5.30967	4.40289	5.09939	4.96309	5.16664	5.0319	5.57095	5.02497	5.11733	5.48467	5.20444	5.47362	5.42616	5.08078	5.09786	5.47706	5.5475	6.8207	6.68292	6.67187	5.31757	5.32149	6.18809	6.80404	6.67118	6.93967	7.69691	8.839	9.40158	9.92674	10.8729	11.6037	12.6689	12.7911	14.3104	14.7362	15.2647	16.007	16.9389	17.3564	17.9862	17.9457	19.4787	19.6116	20.4065	20.616	20.3412	22.1078
	9.76784	8.32792	7.32969	8.21485	7.7998	8.3515	7.77389	8.28004	7.64412	7.82901	8.6193	7.63978	8.62769	8.66146	7.77093	8.01041	8.38978	8.6383	10.069	9.91728	10.0125	9.123	8.69831	9.09295	11.1836	11.1207	12.13	13.4443	14.8786	16.193	17.027	18.7147	19.8359	21.3433	22.6124	25.2396	25.4064	26.9722	27.5242	29.4517	30.815	32.0942	32.86	34.6205	36.4398	37.716	37.7266	37.9448	40.8835
	16.3554	15.0275	12.8654	13.7525	14.2948	14.6174	14.664	14.806	13.8742	14.8723	14.8716	15.0844	14.9425	15.2584	14.8333	14.5779	15.0568	15.7986	17.3643	17.3345	17.68	16.5143	16.3343	16.7115	18.0509	17.6413	18.2302	19.4266	20.8832	22.2258	22.5708	24.2629	24.7336	26.4533	27.1719	29.1423	31.0299	31.3414	32.5189	34.8679	35.2306	36.8961	37.8425	39.4666	41.2093	42.7365	42.708	43.2062	46.2004
	6.11738	4.42838	4.23984	3.95426	4.35325	4.57579	3.98495	4.76922	4.51349	4.41629	5.0137	4.40702	5.03761	5.51317	4.02442	4.20524	4.80817	5.16435	6.25117	6.8254	6.48563	5.79272	5.25849	5.83463	7.30107	7.44906	7.27662	8.67719	10.1426	11.2741	12.0907	13.8661	14.9196	16.2122	17.2469	19.8019	20.783	22.3122	23.6155	25.8836	26.7713	28.5431	28.85	31.3359	32.9233	34.4126	34.7707	36.0677	38.8011
	13.3831	11.4522	10.4029	11.0556	11.0943	11.4486	10.6585	11.0768	11.0333	11.1568	11.3778	11.4757	11.8468	11.7237	11.3582	11.1679	12.211	11.104	13.5103	13.1109	12.9292	12.5318	11.7661	12.7047	13.721	13.4323	14.0626	14.5707	15.764	17.3558	17.7893	18.8578	19.4656	20.3101	21.0208	22.1264	22.6063	23.2885	23.5665	25.0523	25.5442	26.8483	26.8566	27.3074	28.645	30.1757	29.063	29.2591	31.0927
	7.21413	5.51692	4.35559	4.95546	5.40813	5.29044	5.37909	5.86888	5.08876	5.60614	5.84123	5.57092	5.8949	6.30257	5.27913	5.1657	5.8498	5.94866	7.05736	7.14477	7.0741	6.28771	5.97717	6.53214	7.30773	7.18303	7.59209	8.3389	9.70446	10.5539	11.0546	12.3509	13.6006	14.4108	15.5916	17.2405	17.7178	18.684	19.2853	20.832	21.9365	22.8693	23.5167	24.7636	25.9689	26.8858	27.3084	27.734	29.5981
	20.3857	19.5306	17.5259	18.3936	18.4966	18.8352	18.1081	19.1497	18.8314	18.8019	19.3655	19.0081	19.5115	20.0243	18.8175	18.2634	19.0989	19.0349	20.885	21.4124	21.0759	20.1444	19.72	20.2981	22.1118	22.2205	22.9272	23.5554	25.8279	26.6084	27.7688	29.4941	30.2364	31.4312	32.2288	33.7999	34.6245	35.5423	36.2072	37.8278	38.2375	39.4	39.9208	41.0018	42.5549	43.3332	43.5194	43.6559	45.6887
	14.7704	12.7492	11.0452	11.7836	11.9773	12.8981	12.1759	12.3807	12.5009	12.4719	12.8984	12.6921	13.4417	13.1072	12.6819	11.8643	12.708	12.8048	14.4799	14.517	14.0774	13.5709	12.9064	13.602	15.0738	14.8955	15.2217	16.0987	17.4515	18.2233	19.4572	20.6404	21.4321	23.1235	23.8643	25.5653	26.204	27.0528	27.9559	29.4205	30.5916	31.6351	31.9286	32.9347	34.2244	35.9481	35.8208	36.2226	37.5198
	25.944	24.0793	21.8051	23.6591	23.3792	23.3085	23.2111	23.2147	23.234	23.4624	24.054	23.3081	23.863	23.8697	23.5131	23.4723	23.6363	23.8634	25.145	25.2177	25.3168	24.8658	24.6309	25.0319	26.3799	26.1367	27.6239	29.2642	32.0517	33.6708	34.8751	38.0546	39.3919	41.5741	42.9503	45.7441	46.7245	48.6736	50.5953	52.2322	54.2179	55.7967	57.2126	59.1951	60.4974	61.5339	62.8774	63.2533	65.3909
	12.096	9.88546	9.46302	10.39	10.346	10.6331	10.7419	11.1234	10.5775	10.9148	11.1087	11.1922	10.9038	11.4704	10.503	10.3211	10.9089	11.0497	12.0924	12.7529	12.577	11.6977	11.4961	11.8177	12.0705	12.2801	12.0251	13.5816	15.0628	15.275	14.8169	16.6934	17.148	18.1657	18.1454	19.5382	20.4041	20.6962	21.556	23.3367	24.7003	25.6395	26.0466	27.5487	28.4741	30.4971	30.4416	30.751	32.5109
	13.9458	12.458	11.5234	12.0944	12.2724	13.1601	12.3436	12.8692	12.1387	12.7725	12.833	12.6865	13.4871	13.5032	12.1405	12.8058	13.46	13.381	14.3649	15.2105	14.0441	13.9579	13.4337	14.0476	14.7371	15.0996	15.0842	16.2397	17.9369	18.2689	19.0905	21.1604	21.6618	23.5549	24.4472	25.8365	27.1046	28.3045	29.3001	31.2295	32.8176	34.4666	34.9006	35.779	37.8691	39.3117	39.4253	40.055	43.0133
	27.1953	25.9531	24.6777	25.271	25.6661	25.9494	25.1665	26.7966	25.7023	26.0335	26.2884	25.9207	26.1371	26.1108	24.6675	25.6437	26.0685	26.3067	26.9763	27.4138	27.3173	26.4339	27.0739	27.118	27.9073	27.166	27.9029	28.8442	29.1074	31.471	30.9356	31.6831	32.7919	33.1479	33.6276	36.7513	36.4146	37.4177	38.8448	39.2805	41.6504	42.633	42.9384	43.8001	45.4504	47.2848	47.2802	47.8127	50.4296
	15.7615	13.5768	12.1047	12.804	13.4251	13.4737	13.4059	13.9445	13.7165	14.176	14.2452	13.9422	14.4522	14.1553	13.9046	13.6581	14.297	14.1372	15.4885	15.6181	15.8238	15.3438	14.4616	15.1074	15.8819	15.7539	16.1579	16.924	17.9238	19.2024	19.6288	20.8049	21.8122	23.1857	24.1594	25.9801	26.2733	27.0726	28.344	29.6914	31.1762	32.0394	32.2379	33.9238	35.3893	36.6018	37.1031	38.0901	39.8272
	12.7487	12.4949	14.3242	17.3546	19.8222	24.7166	27.0255	28.3803	29.7948	29.5446	28.4018	28.9853	26.1643	25.6119	25.2603	24.5884	23.4023	23.4049	21.4627	22.3442	22.1065	23.4032	23.8316	23.6613	25.2802	25.6838	27.4866	28.098	29.1863	29.6297	31.2029	32.3394	33.9865	35.214	36.9627	38.0928	38.8457	41.2986	42.6136	44.9052	47.1197	47.8187	49.9524	50.9166	53.207	54.3972	57.104	56.8485	58.758
	34.9909	34.5449	36.9104	40.041	41.8274	48.8281	50.881	51.9098	53.7692	53.2785	51.5532	52.4608	49.4926	48.8632	48.3472	46.3482	45.3082	45.8969	44.5389	44.2481	43.9546	45.1607	45.5917	45.8934	45.6075	46.3561	46.5707	47.8461	47.974	48.6783	50.2785	50.6898	51.8781	52.5301	54.0106	55.1831	56.157	57.2365	59.0311	60.4507	61.8348	62.0525	64.44	66.536	67.7881	68.398	72.0555	71.5693	73.5587
	36.8956	36.7032	39.1153	42.4913	43.8251	50.4251	51.8137	53.2354	55.5104	54.9707	54.1843	54.7235	51.7074	51.3031	50.2254	49.5664	49.034	47.6955	46.928	47.7265	46.7281	48.7005	49.3754	48.48	49.0022	48.9634	51.5048	52.133	53.2397	54.2068	55.9906	56.4544	57.5109	59.832	62.1117	64.0834	64.6413	65.877	68.0134	70.4386	72.3777	72.8714	76.1301	77.91	79.9302	81.1132	85.7837	85.6873	87.8744
	28.9309	28.2947	30.7894	33.2739	35.5113	41.0528	43.4202	45.1633	46.5101	46.3584	45.4342	45.2516	43.5514	41.909	42.1385	41.1359	40.297	39.5272	39.0255	38.9639	38.7019	39.8831	40.606	40.0713	41.7186	41.8686	43.996	44.7121	45.7394	46.789	48.6638	49.6751	51.5014	52.3611	55.253	57.86	59.8476	63.2521	66.6312	70.8816	73.3393	75.6786	80.6219	88.2491	94.8457	96.2867	101.822	104.138	106.31
	26.969	26.8647	28.7333	31.7115	33.9637	39.4765	41.1684	43.1651	44.4194	43.969	42.7311	42.9829	40.9958	40.3258	39.6243	38.3336	38.2741	37.2444	36.3426	36.5168	36.6003	37.1589	38.6256	37.864	39.434	40.4341	43.032	42.9763	43.8967	45.0648	47.0317	48.3813	49.4317	51.1833	53.2888	54.9007	56.7374	58.7628	60.9961	63.4358	65.789	66.618	68.3976	70.3044	73.1163	73.4532	76.8322	77.4902	79.4055
	19.1366	19.1295	19.9151	23.5779	25.1012	30.4806	32.7795	33.0647	35.195	35.0429	33.9558	34.0562	32.0663	30.779	30.2755	29.322	29.1033	28.2126	27.1324	27.3454	26.98	27.9932	29.117	28.5659	29.4776	31.0575	32.5446	32.6123	33.0302	34.4191	36.4046	37.2785	38.8675	40.7063	42.5731	44.0807	45.6706	47.7239	49.7508	51.8963	54.6871	54.9977	57.9924	59.0932	61.6682	62.9204	65.3135	66.375	68.3947
	25.7176	25.222	26.3298	29.7148	31.5968	37.7476	39.3965	40.9736	43.2041	42.4508	41.1271	41.399	38.8679	38.9195	37.9582	36.9738	37.2346	35.9867	34.5358	35.0034	35.1581	36.4144	36.7906	36.2482	37.7578	38.5717	39.5141	40.6005	40.5949	41.9881	42.8379	43.991	44.6284	45.4987	47.1397	48.5709	48.1667	49.2955	51.5677	52.0975	54.1421	53.8169	53.8235	55.5897	57.3201	57.6598	59.7605	59.5596	60.7153
	49.3144	47.3925	50.0267	52.8132	56.4592	64.4437	65.4182	68.6162	70.8538	70.8745	70.2038	72.2838	68.2521	66.4116	66.3672	64.7239	65.1415	64.5936	63.7436	63.1964	63.5075	64.3854	66.2531	66.0352	69.0041	68.6014	72.0689	72.6995	73.3581	74.4831	77.3916	78.0715	80.1583	81.426	83.9979	84.9676	85.9252	89.1578	89.7697	94.6381	96.9592	95.8651	98.4547	99.1922	100.603	100.393	105.608	103.366	105.796
	51.6477	51.1529	53.6295	57.3011	60.1236	68.7074	72.0961	73.0579	76.3195	76.4871	75.0636	75.7329	72.6256	72.8214	70.9918	68.7309	68.3462	69.0925	67.0543	66.4759	65.3313	67.3406	69.8937	68.5709	68.1975	71.2696	72.5229	73.4625	73.5094	74.0464	78.0497	79.3052	81.843	82.9546	85.0201	87.7918	89.4317	89.5645	93.6237	95.7902	100.037	99.3535	102.677	104.554	107.307	107.405	113.509	112.264	113.929
	49.3965	49.4042	51.472	55.5952	56.8756	63.2501	66.0376	67.2097	69.0952	68.8177	68.3677	68.1093	65.9667	65.0059	63.945	63.7633	63.4735	62.3995	61.5015	61.3656	61.4721	62.2828	63.2757	62.8687	64.055	66.0119	67.4729	68.7572	69.1333	70.4211	72.0101	73.9756	75.5849	77.4038	79.4124	81.2125	82.5599	85.3518	86.9751	89.8516	92.7971	92.5045	95.8816	97.7817	100.648	101.99	105.303	106.106	108.732
	22.5448	22.7043	24.0974	27.2914	28.6103	34.3765	36.7414	38.1013	40.4342	39.3038	38.4363	38.4977	36.496	35.602	34.9393	34.304	34.1982	32.8331	32.381	32.3092	31.8765	33.2248	33.7669	33.4992	34.5726	34.9369	36.6543	37.3778	38.1107	38.8863	41.1406	41.8082	42.9218	43.8977	46.3712	47.6224	48.8622	50.3525	52.3107	53.8332	55.6563	55.9266	57.3527	59.3123	60.9065	62.1662	64.565	65.5959	66.5125
	40.8294	40.4334	42.0073	45.2679	46.39	52.6892	55.3067	56.2593	58.2626	58.0074	55.8511	56.9663	54.6852	53.8673	53.3682	52.1333	51.4416	50.3507	49.6475	50.0178	50.1742	51.1283	51.8186	51.045	53.3412	54.6838	56.5619	57.6346	60.2714	61.7802	65.8315	68.2923	71.3078	75.0515	78.0867	81.7427	84.7581	88.1568	92.4366	95.6953	99.0642	102.164	106.797	110.982	116.564	121.025	125.986	127.061	128.125
	32.5627	32.8999	34.0842	37.8126	39.6867	45.3715	47.9604	48.8369	50.6337	50.0887	49.3215	49.7471	47.3423	46.7114	45.5011	44.9226	44.0929	43.8978	42.9406	43.5839	42.9706	43.9895	44.6725	44.6679	45.9032	46.5299	48.4841	49.3929	50.5928	51.8784	54.7356	56.334	57.7552	59.9843	62.4871	64.8947	66.3498	69.4294	71.5542	74.8975	77.0443	77.7833	80.4448	82.0695	85.4043	86.4677	89.9295	90.205	92.8517
	39.7336	38.6769	40.8119	43.9915	45.5208	52.7227	54.0372	55.6178	57.7499	56.9199	55.243	55.8044	54.2877	52.6029	52.8265	51.8243	50.9558	50.6433	47.9576	49.7957	48.4199	50.4849	50.3483	50.163	51.548	53.2905	54.7582	55.2548	56.2889	57.3108	58.921	60.6578	61.8218	63.5005	65.8528	68.2623	67.8598	72.4476	74.5924	78.0119	79.2156	79.6247	81.8586	85.9854	88.1895	88.4447	92.5721	92.2291	95.595
	21.5863	21.6872	22.7425	25.8842	27.4097	33.1201	34.9093	36.7519	38.2479	38.0451	36.6519	37.109	34.9094	33.4697	33.6056	32.1347	32.4498	32.1978	30.5443	30.8475	30.5494	31.3384	33.0803	31.6544	34.0015	34.1982	36.5435	37.669	37.9038	39.8983	42.5902	44.15	45.9505	48.7641	51.5275	54.2768	55.6556	59.7528	63.0331	66.5801	70.0313	71.1521	74.5904	76.4312	79.9273	81.0975	84.8811	84.9125	87.5018
	33.4146	34.0029	35.4982	39.0691	40.443	46.864	48.6907	50.64	53.1517	51.5975	50.8621	51.0392	48.9537	47.9833	47.6349	46.3758	45.8705	45.0813	43.7225	44.4464	44.0206	44.6485	45.6898	45.8395	45.5048	46.2562	47.1456	47.8956	47.7976	47.9213	49.0957	50.3266	50.0645	51.1719	52.7916	53.5217	53.5874	54.2298	55.8423	57.0976	58.2633	58.2237	59.8088	60.2289	61.3926	61.5404	63.8604	64.4135	65.2927
	32.2123	32.4678	34.6044	37.6087	39.4626	45.7324	47.6578	49.1678	50.8851	50.2603	49.5468	49.596	47.2459	46.2113	46.2758	44.7498	44.5361	44.0032	42.9078	43.0619	42.721	43.8727	45.1157	44.2365	45.2965	45.3803	46.7089	47.1395	46.9472	46.914	49.013	49.0858	50.767	51.7664	53.0832	54.0726	54.068	55.1324	56.6291	57.4812	59.3016	58.3992	60.7927	61.4251	62.79	63.4078	65.5906	65.336	67.1411
	28.019	28.108	29.849	33.2228	34.4689	40.3291	42.5527	44.0812	45.9241	45.0033	44.016	44.8748	42.1314	41.5835	41.2846	39.921	39.4964	38.8857	38.0504	38.0755	38.2014	39.2599	39.6918	39.8445	39.9017	40.5385	41.8857	42.4187	42.6616	42.9999	44.7711	45.0035	46.1425	46.0773	48.041	48.5163	49.3065	49.8951	51.5441	52.7187	53.3157	53.3942	54.4167	55.3981	56.4044	56.8148	58.9521	59.2392	59.3929
	25.794	25.4687	26.9689	30.622	32.3886	38.1091	40.4707	41.3748	43.0996	42.9188	41.6126	41.8978	39.6747	38.947	38.1457	36.6903	36.8745	35.5365	35.1238	34.8844	35.3194	35.6341	36.6105	36.3627	37.6225	37.841	39.9137	39.8111	40.4727	41.1592	43.4531	44.0169	45.139	46.6849	47.9727	49.4584	50.7404	52.3324	53.4753	56.0529	57.2471	57.7982	59.3238	61.0862	62.9994	64.128	66.9631	67.8778	68.8691
	34.1763	33.64	35.3304	38.8073	40.8236	47.1408	49.0841	50.1862	51.6908	51.9213	50.7384	51.1752	48.8146	47.4565	47.5711	45.7191	45.5643	44.9729	43.6893	43.8828	43.6352	44.7666	45.4653	45.2662	45.993	46.8947	48.8548	49.8518	50.1566	51.6871	54.324	55.1234	56.5543	57.7333	61.0198	62.53	63.7074	65.6634	68.1157	70.5168	73.5762	74.176	76.6424	78.041	80.7318	82.3296	85.4444	84.9548	87.1371
	17.7785	18.2099	19.6607	23.0062	24.4507	29.7139	32.0496	33.0093	34.8915	34.6948	33.4572	33.4921	30.839	30.0666	30.0671	29.165	28.7202	28.4119	26.967	26.5015	27.3558	27.3256	28.3302	28.4256	28.9534	30.6342	32.5094	33.7233	34.4023	34.9973	37.3121	38.6602	40.3055	42.1626	44.1273	46.1821	46.5584	48.4781	50.1282	51.6068	53.0703	53.8544	55.2592	55.9489	57.6866	58.6712	60.0297	60.9746	62.1451
	47.6661	47.3628	49.3642	52.8511	54.3668	61.6903	63.1406	65.1425	66.3922	66.7114	65.2052	66.1101	63.13	62.7125	61.2255	60.1847	60.1681	59.751	58.3073	57.7428	58.0541	58.7253	59.4863	59.7286	60.5123	61.1261	63.1326	63.9066	65.0071	65.3432	67.7514	69.4767	71.1958	72.4095	74.6297	75.9866	77.0246	78.835	81.1	84.268	85.2655	85.5755	87.8798	89.1799	90.665	92.2399	95.1364	95.6919	96.7474
	39.6975	39.5108	41.2626	44.9499	46.5441	52.7635	54.1533	56.9824	58.86	57.51	56.4841	56.4655	53.8306	53.3907	53.2635	51.922	51.2069	51.6074	50.0323	50.3518	50.5304	51.7478	52.5778	52.0705	53.0688	53.0801	55.0336	56.3333	56.371	56.9513	59.0493	60.1235	60.9497	62.1675	63.2738	64.3664	65.7895	68.0784	69.1485	70.8674	72.4947	73.769	75.2237	76.8725	79.5252	80.2493	83.1706	84.8479	86.7183
	9.54295	9.1703	10.9402	14.0037	15.8067	21.2731	23.5083	24.5767	25.9293	25.712	24.9741	24.6321	22.6938	21.1502	21.3735	20.1146	19.3467	19.3668	18.2346	18.224	17.7953	18.7475	19.1669	19.3038	19.4223	20.0544	21.9396	22.1951	23.416	23.6253	24.7877	26.1629	26.2886	28.042	29.0174	30.6029	32.3968	33.9142	35.2447	36.8699	39.1216	39.8604	42.2438	44.2204	46.0427	47.5349	49.5619	51.1369	52.5344
	60.7483	60.2342	62.996	66.4236	67.8662	74.8218	76.9952	78.2633	80.6528	80.2694	78.4942	79.2681	77.2519	75.0061	75.0878	72.9986	72.8883	72.0825	71.6138	71.3227	70.5552	71.909	72.5872	72.3575	74.3293	76.5085	81.3762	84.0385	84.7785	84.1051	87.2174	88.5955	91.1007	92.9912	97.128	99.3021	100.962	104.484	106.698	110.905	113.174	114.765	117.866	120.351	122.247	124.692	129.546	131.803	133.607
IP3R1 shRNA+IP3R1	18.5841	17.1039	16.5204	15.7527	15.7095	15.8112	16.2552	16.1079	16.3205	15.5207	15.1321	14.7408	14.5874	14.5653	14.9118	15.7176	16.4084	17.4706	17.6016	17.3932	17.3756	17.994	17.763	17.9422	20.971	22.2632	22.7706	23.6009	24.0377	24.5423	25.0688	24.8625	25.6553	25.0982	26.0511	26.7336	26.9986	27.7139	28.2817	28.2856	28.691	29.0972	29.283	29.7846	30.7556	30.8925	31.599	31.8856	31.8789
	25.0741	23.3605	23.2923	22.5109	22.8064	22.223	22.7023	21.7815	21.5876	21.2274	20.6125	20.4936	20.2268	20.6069	21.1306	20.8822	20.7247	21.0259	20.4022	19.9985	20.069	20.1608	19.5762	19.454	20.2449	20.8897	21.0018	20.5703	21.1442	21.4456	21.8537	21.9235	22.2448	22.2376	23.3535	23.4987	23.3757	24.2354	25.4811	25.2616	26.0173	26.5599	26.6054	27.3076	28.033	28.6097	28.921	29.4259	29.2964
	13.6056	11.9968	11.6956	11.2279	11.0357	11.0568	11.4966	10.728	10.6897	9.849	9.56687	9.64088	9.45029	9.74138	10.1214	9.77424	9.51213	9.68549	9.88519	8.89632	9.03916	9.09681	8.28061	8.58293	8.89039	9.59844	9.63692	9.6419	10.0218	10.5447	10.7543	10.5047	10.9784	10.967	11.6495	11.8786	11.7117	12.415	13.1731	12.9129	13.5294	13.9022	14.1606	14.3434	15.1622	15.6801	16.1515	16.1802	15.7726
	11.7145	10.4545	9.98495	9.50913	9.47741	9.08202	9.43006	8.91694	8.74324	7.93971	7.41586	7.55559	7.51588	7.76185	8.13256	7.70194	7.25493	7.51225	7.22579	6.97872	7.07797	6.93464	6.58371	6.19595	6.7302	7.23278	7.29188	7.1116	7.45825	7.91459	7.95547	8.18823	8.49656	8.39841	9.27468	9.09612	9.15322	10.0336	10.4878	10.3397	11.4242	11.8726	12.1514	12.3513	13.5608	14.3174	14.7208	15.2862	15.4461
	18.1637	16.7378	16.4126	15.8618	16.0439	15.5586	16.3026	15.4031	15.4507	14.804	14.4986	14.4437	14.1921	14.563	15.1275	14.4549	14.5917	14.8911	14.4919	13.7008	14.5939	14.3563	13.8056	14.0575	14.9556	15.3488	15.4566	15.3736	15.7466	16.0666	16.4121	16.3624	17.1535	16.9434	17.9996	18.0685	18.3177	19.2087	20.1062	20.2285	20.7228	21.7878	22.5165	23.2174	24.2448	25.4619	26.0816	26.6505	27.3275
	18.8859	17.2106	16.8511	16.3745	16.7089	15.8977	16.6121	15.7563	15.841	15.2796	14.8026	14.6644	14.496	14.693	15.4228	14.9688	14.5292	15.0978	14.6072	14.2246	14.2264	14.3478	13.9428	13.8438	14.1978	15.1112	14.8721	14.6289	14.9068	15.5129	15.5288	15.4101	15.8288	15.8384	16.7054	16.7763	16.5871	17.4435	18.272	18.2392	19.2779	19.6659	20.0096	20.4021	21.7157	22.2278	22.8555	23.7269	23.7318
	27.783	26.3428	25.5356	25.0578	25.4766	25.0561	25.7733	25.0478	24.7784	24.5879	24.1125	24.2428	24.214	24.5024	24.9254	24.4934	24.5199	25.0365	24.6348	24.1292	24.3802	24.7018	24.0496	24.0314	25.0013	25.7828	25.7777	25.7107	26.2247	26.2116	27.0886	26.4775	26.6893	26.4042	27.3237	27.4256	26.9702	27.8316	28.4682	28.3312	28.9555	29.5254	29.7186	29.9028	31.1711	31.4919	31.996	32.0368	32.613
	31.5279	30.1025	29.4701	29.1975	29.0417	28.6776	29.3845	28.5449	28.5613	27.9872	27.5044	27.5051	27.4455	27.7066	28.3396	27.7674	27.6829	28.0821	27.6579	26.9293	27.3187	27.4062	26.6651	26.7475	27.3001	28.0862	28.1257	27.8547	28.2593	28.4987	28.9913	28.6941	28.895	28.7896	29.8336	29.7157	29.7571	30.2537	30.7035	31.1979	31.6588	32.1335	32.6615	33.1652	34.2949	34.8762	35.1055	35.8779	36.0864
	19.6916	18.1963	17.6926	16.997	17.3941	16.7805	17.4763	16.6297	16.5676	16.0805	15.8972	15.4545	15.3325	15.6347	16.1528	15.6962	15.3447	15.8771	15.6609	14.9504	15.0785	15.3568	14.5817	14.6745	15.4026	16.2242	16.2261	15.9975	16.5238	16.6972	17.0917	16.9713	17.2895	17.145	17.8189	17.9176	17.9405	18.4044	18.8412	19.0382	19.5484	19.7784	20.003	20.4545	21.1238	21.6292	21.6974	22.0593	21.9487
	30.029	28.2749	27.9233	27.0912	27.2894	26.7045	27.6367	26.535	26.7043	25.9195	25.5897	25.4379	25.2893	25.6292	26.4737	25.3783	25.3491	26.0717	25.777	24.778	25.0932	24.9829	24.5229	24.5537	25.1676	25.8736	26.0075	25.9975	26.0703	26.9071	27.4576	27.3415	27.808	27.9288	29.1897	28.9511	29.1618	29.9214	30.6976	30.6628	31.6323	31.8085	32.3215	32.9103	33.9127	34.3628	35.0274	35.2645	35.1086
	16.7297	14.6386	14.487	13.4238	13.7118	13.7554	14.1039	13.2466	13.137	12.5257	12.9782	12.3987	12.5013	13.0357	12.8228	12.2542	12.494	13.0296	12.136	11.397	11.8688	11.9054	11.3701	11.2394	11.7423	12.3331	11.9827	12.1062	12.8619	13.0357	13.2669	12.9808	13.6115	14.2424	15.5179	15.9665	16.8998	18.5077	19.3976	19.8225	21.3617	22.8046	24.8162	25.1291	27.179	28.7129	30.4484	32.3955	35.0863
	36.6636	34.7186	34.3391	34.02	34.1215	33.4142	34.2766	33.1032	33.0189	32.1705	31.9786	31.9594	31.6952	31.9204	32.7814	32.0315	32.0049	32.2723	31.8292	31.3239	31.3303	31.7775	30.9001	30.7092	31.7154	32.537	32.6983	32.7661	33.5026	33.6264	34.537	34.3086	35.2579	35.2443	36.6489	36.6486	36.8463	38.1738	38.6134	38.9164	40.1727	40.8125	41.5453	41.976	43.6472	44.5828	45.17	45.5855	45.8388
	24.99	23.2093	22.6476	22.3793	22.0803	22.0126	22.5689	21.6813	21.5505	20.8663	20.7943	20.2877	20.2403	20.6674	21.2118	20.6111	20.3917	20.8163	20.5562	19.7264	19.6513	20.084	19.4968	19.5866	20.2712	20.8686	21.0698	20.9242	21.245	21.5053	21.9796	21.9324	22.485	22.321	23.1599	23.4632	23.3843	24.3936	25.081	25.2053	25.5723	26.3478	26.7823	26.9998	28.1541	28.6501	29.2199	29.5984	29.4484
	16.217	14.5603	14.122	13.7387	13.9681	13.3905	14.0025	12.8898	12.9422	12.3484	11.8615	11.9936	11.5392	11.984	12.4406	12.0647	11.7788	12.0106	11.7812	11.4388	11.1341	11.3357	10.8411	11.0328	11.0638	11.929	11.5025	11.5163	11.6724	12.2449	12.6969	12.5076	13.0802	12.7294	13.7382	13.9806	14.0503	14.8904	15.7419	15.7296	16.5081	17.3221	17.6144	18.0922	19.1442	20.2312	20.7101	21.1829	21.4848
	15.1838	13.7011	13.4219	12.8864	12.9973	12.5733	13.0874	11.8644	11.9464	11.3222	11.1416	11.0681	10.8465	11.4323	11.6411	11.6211	11.2736	11.8732	11.3089	11.085	10.9495	10.8091	10.3693	10.241	10.9351	11.7225	11.3986	11.395	11.6029	11.9554	12.0084	12.0878	12.1012	12.4048	13.024	13.2757	13.356	14.3786	14.6414	14.6689	15.1746	16.0987	16.3025	16.7178	18.1399	18.8241	19.4001	19.8312	19.8142
	21.4835	19.9017	19.3415	19.053	18.6879	18.8714	18.6846	18.5258	18.2522	17.6471	17.3509	17.348	17.1212	17.4761	17.9856	18.022	17.6236	18.2068	17.9852	17.2455	17.3592	17.4156	16.6314	16.6101	17.444	17.8902	17.7047	17.4592	17.576	18.3164	19.0844	18.4777	19.0422	19.0646	20.058	20.5006	20.5437	21.1537	21.7155	21.6462	22.4797	23.6196	24.5011	24.2131	25.6046	25.8861	26.657	26.9929	26.4356
	25.8525	24.4545	23.6076	23.2616	23.3231	23.0826	23.5432	22.741	22.8775	21.8213	21.6785	21.7138	21.8154	22.2187	22.5881	22.1437	21.9644	22.7208	22.0685	21.8333	21.6188	21.6155	21.2776	21.0689	21.7527	22.7775	22.6146	22.7103	22.8539	23.6592	24.2835	24.1719	24.8168	24.5925	26.0387	26.6348	26.6993	27.6861	28.798	29.0464	29.9603	30.9198	31.5432	32.0472	33.5993	34.298	35.1076	35.6921	36.1428
	15.1422	13.6508	13.249	12.5633	12.9814	12.1843	12.8402	12.2535	11.8722	11.3091	10.9913	10.939	10.5858	10.8882	11.1582	10.7956	10.4295	10.9596	10.4459	10.2551	9.95438	9.95907	9.53745	9.30795	9.8464	10.7359	10.1717	10.0752	10.5886	10.8427	11.1468	10.6757	11.3658	11.1548	11.8672	12.2639	12.1912	12.8853	13.3833	13.3218	13.814	14.4585	15.0617	15.1428	15.999	16.6027	16.8241	17.2399	17.3025
	24.5552	22.971	22.603	21.9582	22.3492	21.7741	22.3449	21.8124	21.3369	20.8725	20.7636	20.0108	20.7381	20.6926	21.158	20.6861	20.4745	21.1194	20.5253	20.264	20.7743	20.7438	20.4743	20.3709	21.2618	22.5651	22.316	22.2592	22.6348	23.3914	23.7026	23.3817	24.3272	24.4141	25.5448	25.9487	26.3189	27.9316	28.1005	29.1364	30.1166	30.8012	31.6471	32.8749	34.5931	35.8868	37.018	37.8728	38.7963
	33.7265	33.0661	32.1329	31.7899	31.866	30.5709	31.8494	31.1619	31.3548	30.751	30.7684	30.573	30.7659	30.6276	31.6081	30.2379	30.5547	30.9823	30.7761	29.3176	31.0484	30.6032	30.3547	30.5526	31.1868	32.5768	32.357	31.8856	33.2414	33.9155	34.2395	33.548	35.0485	35.2344	36.6509	37.1	38.2676	38.9685	40.2307	41.1808	42.8053	43.3608	44.9642	46.2632	48.491	50.2483	51.4007	53.7869	55.6016
	37.9966	36.5541	36.2446	35.7873	35.9587	35.6121	35.9591	35.2625	35.4642	34.9139	34.1042	34.1917	34.2118	34.6082	35.0818	34.5339	34.2595	34.7435	34.5664	33.8941	33.8751	34.1808	33.4466	33.2723	34.9123	35.4468	35.2141	35.4428	35.7495	35.8171	36.6791	36.4455	36.9536	36.9844	38.3221	38.6736	38.4975	39.4777	40.6762	40.0932	41.3385	41.9336	42.669	43.0291	44.1515	44.911	45.7282	45.7074	46.1561
	25.7025	23.4284	23.1878	23.0458	23.0911	22.6251	23.2312	22.8118	22.4774	21.8508	21.5535	21.4688	21.614	21.8563	22.2818	21.8571	21.6447	22.4721	21.8149	21.0608	21.0943	21.5387	20.7782	20.877	22.1725	23.0788	22.4955	22.8703	23.2916	23.5651	23.811	23.5233	24.1753	23.9084	24.8388	25.1687	24.7329	25.6644	26.5281	26.6601	26.8377	27.7501	28.2497	28.2313	28.8623	29.863	29.8758	30.8934	30.4923
	20.5479	18.7431	18.0836	17.6065	17.8586	17.0962	18.0716	16.7623	17.1732	16.246	15.5408	15.5937	15.5885	15.7536	16.2909	15.7899	15.4689	15.9551	15.5348	15.3085	14.9978	15.1901	14.7008	14.6322	15.2117	15.8948	15.7152	15.6856	15.9866	16.2264	16.2585	16.0506	16.5149	16.5315	17.1797	16.8126	16.7456	17.0049	17.5626	17.7067	18.1769	18.4376	18.6932	18.8986	19.9751	20.1331	20.2758	20.5683	20.2838
	16.1092	14.4909	13.9438	13.8058	13.8907	13.731	13.83	13.3901	13.0875	12.5772	12.2433	12.0645	11.9138	12.5267	13.1008	13.0575	12.3072	12.6495	12.6389	12.1825	12.1255	12.6613	12.2159	11.8643	12.7242	13.191	13.1765	12.9059	13.669	13.9242	14.154	13.848	14.2268	13.854	14.8126	15.067	15.1301	15.6733	16.213	16.0639	16.8214	17.1708	17.3043	17.7504	18.557	19.6787	19.8016	20.083	20.1599
	22.791	21.0292	20.9112	20.0259	20.2817	20.0211	20.933	19.9755	19.6885	19.4439	18.5141	18.505	18.7678	18.6268	19.7695	19.0238	18.8342	19.3214	18.5736	18.0581	18.2676	18.0912	17.7113	17.813	18.559	19.7351	19.52	19.6694	19.6041	19.9409	20.3412	20.4855	21.1382	21.3633	21.8925	21.7591	21.4315	23.1209	23.631	23.5109	24.3963	25.0746	24.9456	25.4526	26.6971	27.2604	27.3705	27.9558	27.7573
	20.0678	18.2616	18.0735	17.4371	17.6034	17.005	17.5556	16.8859	16.7322	15.9627	15.535	15.391	15.3225	15.4835	16.3006	15.608	15.2709	15.7764	15.5083	14.7521	14.8304	15.0532	14.3495	14.1486	14.8063	15.5017	15.3499	15.4599	15.7325	15.963	16.4148	16.1221	16.7345	16.4075	17.4463	17.3471	17.2895	18.1081	18.7005	18.6275	19.0192	19.5987	19.4817	19.9771	20.8167	21.2678	21.5559	21.6234	21.749
	13.5997	12.6179	11.7155	11.2376	11.7398	11.1734	11.652	10.8319	10.5737	10.3575	10.1619	10.405	9.82688	10.2338	10.5793	9.592	10.1949	10.4549	10.225	9.28071	9.509	9.66921	9.23846	9.08423	9.84294	10.7742	10.2836	10.5115	11.1528	11.6826	12.3677	11.4702	12.4447	12.6335	13.8206	13.9548	14.3918	15.2726	16.6073	17.1914	18.0515	19.0551	19.5251	20.5555	21.5112	22.4384	23.456	23.7906	24.5671
	20.0041	18.6172	18.2302	17.673	17.6811	17.4941	18.1897	17.1727	16.7745	16.9905	16.0668	16.3496	16.4007	16.6321	17.0695	16.234	16.5291	16.6047	16.599	15.8954	16.0593	16.7154	16.0066	16.2451	16.8221	17.7307	17.0926	18.0913	17.816	18.0667	19.2801	18.6237	19.8114	19.789	20.9362	21.3322	21.9304	23.673	24.0507	24.8432	26.3283	27.935	27.5145	29.3201	30.6668	32.6348	33.8328	34.4106	35.2659
	35.2337	36.0206	36.7936	36.3919	37.3985	38.5504	39.1855	39.0389	40.2211	40.3258	40.9882	40.5006	41.2097	41.0574	41.3421	41.2508	40.966	41.7577	41.9289	42.8041	42.8365	43.0313	43.2941	44.0024	45.6287	45.4729	46.2474	47.3464	47.7894	48.4109	48.4339	49.496	50.8616	51.9228	50.9778	51.0404	50.7379	50.8806	51.956	52.0132	53.1983	53.7456	53.425	54.3566	55.4354	55.6074	56.087	56.893	57.8902
	19.3188	19.8153	20.2685	19.9889	21.0492	21.8778	22.2362	21.9534	23.2711	23.2625	23.601	23.0278	23.3898	23.484	23.6697	23.4779	23.1818	23.063	23.6722	24.0858	24.2738	24.59	24.5969	25.0147	26.0073	25.8223	26.4954	27.5846	27.9397	28.298	28.7142	29.8993	29.9653	30.9226	30.0755	30.3413	29.8515	30.2565	31.0158	31.0008	31.8467	32.2216	31.947	32.7089	33.1874	33.8464	34.2379	34.8847	34.9656
	36.816	37.1125	38.3921	37.7463	38.9328	39.6478	40.3074	39.7893	41.3668	41.4532	41.8495	41.7635	41.74	41.7849	41.6439	41.8196	41.2803	41.9369	42.2801	42.4892	42.7522	42.331	43.0409	43.1104	44.3174	44.3874	44.4675	45.7381	45.868	46.4536	46.5341	47.6875	48.1824	49.2396	48.585	48.3603	48.0354	48.2308	49.1055	48.8517	50.0488	50.5728	50.4451	50.9216	51.5117	52.0959	52.5691	53.095	53.7283
	40.9461	41.1666	42.3356	41.6644	43.257	44.1392	44.5265	44.3524	45.8214	45.6877	46.2551	45.9812	46.47	46.1898	46.8437	46.8112	46.1021	46.6286	47.3525	47.9454	48.1298	47.9437	48.4656	48.0067	50.5393	50.4678	51.3008	52.1667	52.6851	53.2796	53.4798	55.1325	55.119	56.7147	55.6878	56.0849	55.3984	55.4335	56.9094	57.0862	57.4247	58.5839	58.0332	59.2272	59.7212	60.4282	60.6963	61.5582	62.1686
	81.9939	83.324	85.3603	84.3998	86.2903	87.4261	87.9023	87.4087	89.3701	89.9425	90.5162	90.4117	91.5467	91.646	92.2219	92.183	91.9065	92.7004	94.3381	95.3573	95.2794	95.3618	96.6988	96.5866	101.941	102.233	103.738	104.512	105.435	106.105	107.038	108.414	109.102	111.302	110.553	110.654	110.274	110.828	111.968	112.477	114.074	114.294	114.217	116.275	117.117	117.722	119.166	120.321	121.289
	77.5788	78.2005	80.3697	80.2161	80.6743	82.5938	83.6888	83.2239	85.2073	84.7026	85.0646	85.491	86.4028	86.2772	87.0632	86.9075	86.8402	87.7181	88.765	89.5747	89.5328	89.9948	90.8858	91.3305	95.1447	95.7102	96.4484	97.0136	97.7499	97.9617	99.1483	100.055	101.644	102.946	101.795	102.812	101.433	101.969	103.758	103.879	105.064	106.061	105.573	107.668	108.391	110.257	109.806	110.997	112.224
	40.6853	41.2835	41.9578	41.856	43.4653	44.7024	44.655	45.0262	46.5195	46.7742	47.124	47.2183	47.7041	47.7885	48.1271	48.0491	48.0486	48.4968	49.5303	50.0249	50.7147	50.41	50.9663	51.527	55.3648	55.1687	56.1906	57.0695	58.005	58.4895	59.2307	60.5173	61.0141	63.034	61.545	61.7684	61.8041	62.0499	63.8069	63.2674	64.8171	65.5884	65.1857	66.786	68.0474	68.2849	68.8642	70.1052	70.6429
	38.685	39.3505	40.305	39.7182	41.6219	42.2929	43.0202	42.8503	44.1935	44.5165	45.219	44.5835	45.4711	46.3062	46.0705	46.9566	46.9056	48.0183	48.5545	49.3448	49.2333	49.8351	50.8402	51.2465	57.5853	58.0441	58.8215	59.8797	60.8677	61.803	62.3434	64.2636	64.6143	66.8443	66.2582	66.9003	66.2628	66.8928	68.9112	68.588	70.368	71.7828	71.3371	72.6912	74.147	74.4874	75.1489	76.3919	76.8776
	65.8357	66.9587	69.0708	67.7768	69.3716	71.4353	71.7259	72.0225	72.8888	73.8682	74.6847	74.678	75.4703	76.0016	76.5746	76.551	76.43	77.5917	78.1736	79.6759	80.4421	80.7273	81.4783	82.3037	88.7127	89.3146	90.103	91.9585	92.358	94.088	95.0079	96.0957	97.507	99.6237	99.5964	100.145	99.7631	100.851	101.507	102.331	103.951	104.872	104.904	106.678	107.73	108.023	108.467	110.442	111.5
	101.97	103.016	105.613	104.62	106.774	108.862	109.677	109.334	111.291	112.638	112.683	113.204	114.09	114.491	115.512	116.303	115.516	117.206	118.047	119.815	120.109	120.757	121.9	123.272	132.069	132.778	134.104	135.638	137.422	137.639	138.04	141.214	142.585	144.546	144.048	145.414	145.451	146.238	148.047	149.04	150.874	150.987	152.013	154.818	157.963	157.953	159.574	161.924	164.429
	71.3519	72.4316	73.8406	73.1691	74.7513	75.8335	76.4038	76.0608	78.3594	78.8154	78.6251	79.4531	80.4067	80.1998	81.8477	81.6203	81.5836	81.7913	83.25	84.2432	84.2835	85.1114	85.9737	86.4061	92.3914	93.2292	93.6275	94.9088	95.5717	96.3325	97.2323	98.729	100.096	101.378	101.045	100.774	100.539	101.521	104.755	104.01	106.407	106.376	107.424	109.425	111.11	111.901	114.023	114.204	117.02
	54.2586	54.3242	55.6681	54.8276	56.4728	57.2081	57.9875	57.4423	59.1861	59.0498	59.7962	59.2091	60.0453	60.3311	60.5627	60.5958	59.6691	60.4615	61.2626	62.0662	62.1366	62.305	62.588	63.4906	65.6353	65.4814	66.2208	66.7776	67.362	68.287	68.9628	69.7065	69.8093	71.5742	70.6813	71.1514	70.5238	70.9527	72.3228	72.3169	73.3695	74.0811	73.7471	75.766	76.1998	76.5193	77.5349	78.8344	79.8249
	49.3161	49.9455	50.8924	50.0564	51.377	52.7119	53.1523	53.3447	54.4115	54.4337	54.9062	54.11	55.2161	55.0341	55.3889	55.0966	54.6513	54.9446	55.5172	55.9402	56.6448	56.9399	56.7487	57.4301	58.9485	58.071	59.1616	60.1911	60.8209	62.1007	61.7444	63.1351	63.6138	64.846	64.1424	64.1879	64.0281	64.4167	65.7446	65.5211	67.4826	67.7165	68.5508	69.4887	70.7538	70.949	71.5664	72.8813	73.7021
	36.1698	36.1838	37.72	36.5685	38.2804	39.3593	39.6898	39.5449	40.7981	40.7396	41.2905	40.9873	41.7203	40.9276	41.4144	41.5761	40.9327	41.7966	41.9004	42.4272	43.0365	43.1522	42.9024	43.6142	45.2439	45.0469	45.9758	46.7024	47.5105	48.1839	48.3704	49.1285	50.0465	51.9681	50.8397	50.4274	50.6542	51.3446	52.3003	52.6544	53.7248	54.6235	54.6925	55.9198	57.3481	57.5022	58.1713	59.0636	59.6068
	28.3878	28.9684	30.1873	30.0089	31.2123	31.6754	32.3094	32.2979	33.7044	33.6251	34.0787	33.9613	34.0425	33.8274	34.5371	34.5634	34.1691	34.7008	35.2576	35.9376	35.9416	35.9213	35.9845	36.925	38.9276	38.7264	39.5819	40.4171	40.3044	40.8028	41.7347	42.6337	42.7527	44.3223	43.1612	43.3617	43.5875	43.7724	45.2538	44.6101	46.0761	46.8092	46.7152	47.9653	48.6194	49.3061	50.118	50.6517	51.5341
	32.7728	33.2229	33.8859	33.3117	34.8794	35.5377	35.9978	35.5697	37.1805	36.5746	37.5683	37.3171	37.7339	37.419	37.7197	37.5107	36.7777	37.2912	37.6815	38.3784	38.4014	38.9029	38.9889	38.6712	40.0445	39.5813	40.5021	41.0266	41.4181	42.4837	42.4813	43.8097	44.0306	45.1585	44.2867	44.2594	43.7802	44.1781	45.4215	44.8423	45.5886	46.2822	46.19	46.4713	47.2278	47.7845	47.9754	48.7881	49.1261
	43.6485	44.0656	45.1263	44.7448	45.6999	46.6718	47.0666	46.7214	48.0069	48.0203	48.7736	48.6102	48.7149	48.6563	48.8062	48.3602	48.1464	48.6212	49.0924	49.5011	49.6668	49.902	49.7804	50.4694	51.5965	51.1282	52.0393	52.8888	53.4742	54.0582	54.374	55.5622	55.9724	56.9963	56.3824	56.5605	56.2081	57.0229	58.264	58.3751	59.3801	60.2732	60.3823	61.3914	62.274	62.8023	63.624	64.4893	64.9524
	47.0361	47.1249	48.1419	47.9696	49.2526	50.2069	50.6348	50.2078	51.4751	51.6737	52.5118	52.0898	51.9753	51.8714	52.3004	52.4854	52.1838	52.229	52.9368	53.1008	53.3174	53.3721	53.6723	54.2791	55.8523	55.642	56.7537	57.3097	58.0641	58.5578	58.7429	59.8464	60.128	61.6581	60.3349	61.2662	60.6607	61.1783	62.0717	62.1873	63.5686	64.2316	63.9181	64.9594	65.7682	66.3942	66.4952	67.8459	68.2426
	48.1301	48.817	49.783	49.5586	50.8025	51.9418	52.4578	51.5866	53.7644	54.0567	54.0244	53.5843	54.3026	53.5393	54.2236	54.551	54.4129	54.3183	55.0529	55.6547	56.1549	55.9508	55.9692	56.1423	58.4762	57.7855	58.5811	59.1469	60.0399	60.9952	60.6277	61.7334	62.9871	63.5014	62.8604	62.961	62.5163	62.7483	63.8413	63.699	65.3761	65.8012	64.9632	66.0114	66.9378	67.3267	67.9495	68.8031	69.7542
	48.881	49.351	49.8443	50.7982	51.5412	52.1995	52.6486	52.886	54.0921	54.1335	54.6006	54.0138	54.8426	54.5566	55.5661	54.4445	54.6377	54.547	56.2123	56.3737	56.1368	57.4126	57.2448	57.2792	59.9624	59.7837	60.34	61.1329	62.0887	63.1105	63.5755	65.1349	65.1655	66.6682	65.5983	65.3736	65.2448	66.0945	66.7462	66.9075	67.9571	69.1806	68.3403	70.2878	70.5701	70.9968	71.901	72.3386	73.4181
	27.2846	27.8429	28.4756	28.2483	29.0986	30.4747	30.5495	30.4429	31.6776	31.6186	32.4794	31.8074	32.3192	32.4207	32.3063	32.5906	31.9585	32.2927	33.1816	33.5229	33.0145	33.7103	33.7073	34.0032	35.5477	35.172	36.0406	36.8371	37.3862	37.9143	38.3726	39.0293	39.6256	40.7196	39.8396	40.013	39.3185	39.9443	40.8217	40.7488	41.4047	42.0604	41.7694	42.612	43.8108	43.7644	44.453	45.0632	45.2274
	36.9886	37.6038	38.4536	38.5302	39.485	40.3573	41.0106	40.7313	41.7198	41.826	42.9298	42.0638	43.1913	43.1914	43.0289	42.9409	42.6278	43.1598	43.8197	44.2368	44.6555	44.6488	44.7067	44.9585	46.8709	46.167	47.2961	48.5562	48.6087	49.5818	49.7722	50.9428	51.427	52.5469	51.7499	52.0658	51.6435	52.0353	53.1416	52.4462	53.4486	54.4844	55.0207	54.7383	56.331	56.1749	56.9079	57.6769	57.9488
	33.94	34.4357	35.4067	35.2553	36.0786	36.9746	37.439	37.116	38.4879	38.7838	39.1041	38.7596	39.6094	39.0852	39.218	39.1058	39.0052	39.0842	39.8464	40.4582	40.8109	41.0572	40.4304	41.2494	42.794	42.3023	42.8767	43.624	44.2368	45.3964	45.3414	46.3011	47.0413	47.8621	47.1355	47.0825	47.0054	47.4327	48.2653	47.9749	49.4401	49.5334	49.3603	49.7511	50.9871	51.0508	51.8692	52.5846	53.0585
	35.4084	35.7631	36.847	35.7837	37.4683	38.0756	38.4544	38.7911	39.5546	39.6397	40.4821	39.6994	40.4145	40.0828	40.6953	40.5344	40.456	40.7902	41.3743	41.8983	42.0809	42.5895	42.4872	42.5567	44.9702	44.5716	45.2313	46.0144	46.33	47.0468	46.8446	47.6565	48.727	49.6815	49.0285	48.5027	48.256	48.596	49.8702	49.8172	50.5772	50.6006	50.8374	51.77	52.4128	53.2675	53.2934	54.0126	54.2875
	35.753	36.208	37.1814	36.7934	38.1709	39.1231	39.4845	39.04	40.614	40.8379	41.2941	40.6929	41.6489	41.3271	41.7971	41.6606	41.0364	41.2818	42.228	42.5122	42.5125	43.0538	42.9126	43.406	45.0171	44.9975	46.1158	46.8948	46.8741	47.7097	48.302	49.2219	49.1968	50.9044	49.4841	49.7531	49.696	50.1061	50.8724	50.6257	52.0485	52.6055	52.3342	52.9972	53.8949	53.9871	54.8867	55.0651	55.8911
	50.0811	50.8695	51.9433	51.7589	52.4078	53.8852	54.5746	53.9872	56.0405	55.7437	56.8125	56.2676	56.9908	56.7281	57.4085	57.5541	57.0835	57.912	58.188	59.223	59.1867	60.2619	60.6472	61.0545	65.1839	64.7601	65.9105	66.8902	67.8929	67.9542	68.5641	69.3567	70.5435	72.0367	70.8335	71.953	71.7051	72.0277	73.411	73.2674	74.1992	75.143	75.4304	76.6003	77.8566	78.7053	79.3601	80.8689	81.587
	33.386	33.6247	34.631	33.8337	35.513	36.1558	36.6173	36.4046	37.7596	37.5548	38.172	37.3795	38.0686	37.6278	38.1243	37.8618	37.2918	37.3207	38.309	38.6815	38.4631	38.732	38.6377	39.3054	40.7982	39.6812	40.5659	41.1778	41.5118	42.188	42.5568	43.6326	43.9496	44.9938	44.1819	43.9603	43.8341	43.673	45.1008	44.8595	45.5954	46.2452	46.0696	46.1889	47.5241	47.2057	47.9467	48.7178	48.8155
	39.7053	39.9124	41.0904	40.2903	41.8547	42.2832	42.8847	42.9165	43.8825	43.8644	44.6459	43.6321	44.0886	44.1851	44.3153	44.3486	43.0787	44.1511	44.4372	44.8562	45.3905	45.4458	45.4107	45.7388	47.1632	46.9631	47.7439	48.4922	48.849	49.8778	50.3273	51.2683	51.746	52.7653	51.5694	51.9593	51.3274	51.8377	52.6413	52.7255	54.0707	54.11	54.0161	54.8276	55.1281	55.9048	55.9573	56.6741	57.0191
	39.3518	39.9507	41.1443	40.2516	41.9993	42.7799	42.7752	42.3019	43.8443	43.6925	44.5183	43.7114	44.5133	44.6031	44.6941	44.7682	44.4269	44.897	44.7369	45.6393	45.7365	45.7375	45.9138	46.2192	47.8444	47.9228	48.5927	49.2851	49.6501	50.5085	50.7266	51.5706	51.9724	53.2815	52.0738	52.6891	52.2796	52.1706	53.377	53.6987	54.4379	55.1795	54.6764	55.7869	56.6628	56.1912	57.2183	57.9442	58.6983
	29.3356	29.5737	30.5481	29.9683	31.3163	32.139	32.3027	31.9605	33.5605	33.2177	33.5723	32.8581	33.2807	33.1656	33.6215	33.4127	32.8708	32.7871	33.6182	33.9246	34.34	34.2108	34.0656	34.3507	35.4041	34.9399	35.3966	36.5365	37.0147	37.745	37.9126	38.8842	38.8936	40.2557	39.2553	39.4064	38.9761	39.5107	40.1286	40.0308	41.4622	41.6328	41.6448	42.3672	42.9598	42.7497	43.6285	44.4308	44.7275
	35.8568	36.809	37.784	37.0079	37.9745	39.3861	39.6388	39.7491	41.2656	41.1838	41.2487	41.6104	42.123	41.9904	42.1565	42.2789	42.2161	42.3913	42.9862	43.4417	43.8736	44.1647	44.3417	44.6721	47.3835	47.4206	48.4782	49.1246	49.438	50.0956	50.208	51.243	52.0369	53.2444	52.8606	52.5465	52.8423	52.7887	53.7534	53.8133	55.2356	56.1857	56.156	56.9796	58.2569	57.8809	59.6541	61.1138	61.2015
	78.7065	79.5386	81.7802	81.7141	82.584	84.3522	85.118	83.8886	86.2624	85.8896	86.0355	85.8467	86.4835	85.4654	86.7161	86.194	85.4092	86.2	86.9013	87.201	87.1236	87.4165	87.2253	88.181	89.4667	89.619	90.2061	90.9983	91.8854	91.5469	91.8197	93.845	93.532	95.402	93.9522	93.4098	93.1444	93.6643	95.3215	95.6743	97.1144	97.0048	97.3828	98.0938	100.747	101.482	101.302	103.429	104.306
	60.3716	61.2549	62.2748	62.0278	63.72	64.8247	64.6998	64.2916	66.5173	65.8644	65.5572	66.4028	65.7885	66.6495	65.7496	66.8002	64.9509	66.4488	66.9856	67.4736	67.0563	67.5705	66.7935	67.5865	69.1919	69.1856	69.1264	70.2336	70.5922	72.0885	70.4592	73.7947	73.0387	74.5643	72.9124	72.4616	71.9604	72.6074	75.5367	74.5472	75.572	76.3308	77.0045	78.097	79.1796	79.1483	79.928	80.4832	81.5909
	54.9161	55.9667	56.7482	56.6586	58.0054	59.617	59.9588	59.7949	61.1848	61.6506	62.2163	62.5119	63.0978	62.9103	63.5134	63.5588	63.2826	63.9214	64.4875	65.2105	66.0866	66.2291	66.7941	67.0276	71.2912	71.0505	72.7236	72.8274	74.5146	75.0436	75.4997	77.0668	77.974	79.8849	78.3959	78.7722	78.4863	79.0192	80.3309	80.5545	82.3862	82.8729	82.7759	84.0854	85.8266	85.1708	87.1197	87.5041	89.0626
	74.7792	75.8857	77.8459	76.8148	78.39	79.9054	80.7557	80.8904	81.4487	81.7033	82.2818	82.4711	83.1704	83.0782	83.6551	83.6996	83.3971	83.9761	84.732	85.9799	85.9323	86.2928	87.2506	87.5668	91.2146	90.8173	91.8377	92.2995	92.5133	93.7728	94.3726	95.6889	96.4353	98.0168	97.5627	97.8131	97.278	97.9881	98.8019	99.1469	100.32	100.954	100.963	102.264	103.509	104.025	104.888	106.383	106.454
	37.1109	37.1815	35.9461	36.8695	37.0418	37.3543	37.0702	37.7228	37.6879	38.5882	39.3065	40.3382	40.2024	40.9556	41.7167	41.258	41.0275	41.2323	41.8211	41.4951	42.5145	42.5204	42.5565	43.0359	43.0564	41.7283	41.8437	42.9038	42.96	43.1614	43.4663	44.0534	44.6877	45.1866	45.3732	45.8323	46.4083	47.1171	47.2054	47.6504	48.2987	48.4286	48.9802	48.3626	48.206	49.1562	49.2813	49.4428	48.1677
	33.8586	33.0854	32.308	33.1213	33.4945	33.4603	33.8994	34.0588	33.8191	34.7952	35.254	36.7319	36.376	37.0083	37.919	37.7668	36.7051	37.0636	37.6704	37.5133	38.6141	38.6234	38.2436	38.3997	38.3753	37.3998	37.6044	38.403	38.6512	38.5209	39.0152	39.0414	40.2439	40.1259	40.1046	40.8047	41.4338	41.7961	42.2426	42.3652	43.5499	43.3161	43.8728	42.8832	43.2707	44.0743	44.1575	44.2958	43.1056
	45.9834	45.6359	44.7432	45.0885	45.98	46.132	45.7834	46.495	46.0335	47.4977	48.2149	49.1715	49.2772	49.9585	50.0456	50.3968	49.3347	50.0394	50.3191	50.4118	51.4682	51.6975	51.4364	52.0686	52.2171	51.4673	51.1308	52.2976	52.4038	52.5307	52.7805	53.2247	54.539	54.5023	55.0687	55.3083	56.3548	56.223	56.4347	56.5956	58.1061	57.59	58.4456	57.5148	57.8318	58.7449	58.5568	58.8084	57.3251
	52.0861	52.8191	51.442	52.948	53.1188	53.4104	53.5634	54.2008	53.9765	54.8818	56.0608	57.2068	55.855	57.8387	58.1311	58.0991	56.8345	57.4452	58.5289	58.0042	60.0577	59.6652	59.016	60.1262	63.9625	61.5582	62.2269	62.7858	62.5341	63.0673	62.7785	63.8944	64.326	64.6327	65.1023	65.6282	65.6185	66.6188	67.2609	66.3832	67.8736	67.2228	68.6039	66.9404	67.3343	69.0165	68.3175	68.1268	66.6724
	39.5647	39.4762	38.1552	39.2338	39.8475	40.2334	40.4615	40.9192	40.8213	41.7701	43.1283	44.0737	43.8122	44.9023	45.2956	45.4211	44.6986	45.0105	46.0084	45.9129	46.8507	47.2365	46.7634	47.7655	48.1944	47.1598	47.4293	48.0442	48.5481	48.6965	49.399	49.9003	50.5908	51.2534	50.9108	51.9247	52.7937	52.8895	53.8202	53.3489	54.6987	54.5488	55.0687	54.3511	54.1957	55.4308	55.824	55.7735	54.5445
	43.5181	43.0358	42.381	43.1441	43.9669	44.2488	44.2824	44.8073	44.8579	45.891	46.6833	47.9463	47.4783	48.4738	48.8569	49.1334	48.3913	48.727	49.9591	49.8188	51.414	51.3429	51.2461	51.5107	53.4395	51.9613	53.0164	53.3854	54.3331	54.3421	55.2575	55.6599	56.3838	56.7342	57.7436	58.1197	58.9076	59.2638	60.2967	59.8979	61.0698	61.6422	62.1229	61.4558	61.3604	62.5383	62.4207	62.1703	61.5985
	30.1479	29.669	29.327	29.6462	30.1192	30.2086	30.5523	30.9045	30.8711	31.7919	32.5611	33.4716	33.3935	34.1061	34.5185	34.5751	33.5907	34.0059	35.2376	35.3431	36.492	36.0259	35.5813	35.6044	36.099	34.7741	35.4376	36.2947	36.3387	36.2888	36.5763	37.0116	37.4401	38.0111	38.0564	38.9806	39.4409	39.8336	40.1647	40.223	41.2863	41.212	42.0061	40.7629	40.9736	41.7079	41.7458	42.1403	40.7481
	46.2316	45.7801	45.0223	45.7905	45.9082	46.202	46.4665	46.3379	45.9894	47.2389	48.7211	49.4388	49.2689	49.7092	50.2592	50.2814	49.7179	49.5951	50.6266	50.6899	51.866	52.1205	51.6775	51.8298	51.6624	50.3508	50.9133	51.6064	51.7823	51.6672	52.564	52.5321	53.318	53.3914	53.9892	55.0749	55.219	55.265	56.06	55.7797	56.8759	57.161	58.0011	56.5992	57.2509	57.5643	58.1842	58.363	56.6448
	42.1466	41.8927	41.3592	42.0932	42.0614	42.5515	42.4986	42.7975	42.5832	43.8655	44.682	45.4943	45.4205	45.7458	46.8526	46.7484	46.0349	46.3552	47.082	46.9531	48.2645	48.117	48.0826	48.1408	48.3572	46.9637	47.4945	48.4308	48.6292	48.605	48.6881	48.991	50.2489	49.9008	50.7711	51.1286	51.3889	52.4202	52.6845	52.5885	53.9731	53.8535	54.5689	53.5611	53.9087	55.0247	54.9784	55.1232	53.2994
	31.4337	30.8782	30.36	30.7386	31.0527	30.8485	31.1019	31.4251	31.3123	32.4295	32.7535	33.8131	33.5456	34.3166	34.8773	34.62	33.8195	34.3082	34.7275	34.4168	35.6773	35.6909	35.3572	35.6644	35.3992	34.1992	34.4495	35.5163	35.4169	35.1551	35.494	35.7029	37.0045	37.0422	37.2732	37.5489	38.1122	38.594	39.1416	39.3373	40.1165	40.0832	40.6996	39.8338	40.0779	40.9787	41.1148	40.9152	39.6651
	55.2004	55.2112	53.8883	54.5326	55.4394	55.2323	55.5875	55.8788	55.1821	56.4913	57.2957	58.4959	57.9839	58.692	59.5502	59.3235	58.0897	58.3502	59.5681	59.2563	60.2968	60.3979	60.0532	60.2404	60.8575	59.2811	59.4545	60.9571	61.2318	60.9291	61.287	61.9282	62.7845	63.3254	63.4738	64.9662	64.5488	65.6207	66.2376	66.6013	66.905	67.4582	68.0462	66.8521	67.9394	69.1158	69.2002	69.4367	67.5693
	54.015	53.3272	52.77	53.3606	54.1808	53.802	53.6662	53.6696	53.8951	55.1203	54.9684	56.4357	56.1504	56.8814	57.345	57.7736	56.5702	57.2882	57.7313	57.4072	59.4682	58.756	58.9011	58.9628	59.5392	58.0926	58.3048	59.6686	59.7081	59.5035	59.551	60.0909	61.6066	61.4309	62.0457	63.4103	63.3204	64.1382	64.4319	64.5067	65.4688	65.3291	66.4458	65.5961	66.2243	66.8068	67.0589	67.2023	65.8008
	52.3334	51.7793	51.1075	52.142	52.3938	52.0395	52.9453	52.8078	52.6391	54.1112	54.4359	55.5087	55.4833	56.5545	56.7689	56.7334	56.2732	56.7298	56.9712	56.7536	58.6223	57.8063	57.7528	58.1011	58.4054	57.4046	57.6117	58.9615	59.182	58.8863	58.7591	58.8952	60.0483	60.4298	60.6866	61.2678	62.462	62.325	63.2715	62.679	63.7574	64.1605	64.5598	63.4978	63.5786	64.1434	64.5176	64.9303	62.9574
	50.448	49.9455	49.0426	49.3148	50.5782	50.7223	50.6214	51.4847	50.0735	52.0014	52.7188	53.9174	53.9584	54.5383	55.3563	55.0348	54.7883	54.3981	55.4687	55.278	56.6783	56.2821	56.4797	57.0442	58.0189	55.962	56.3691	57.1414	57.424	57.5399	57.7926	58.2521	58.1117	60.0325	59.0225	60.1091	60.7085	61.3684	61.2734	61.2023	62.2151	62.8974	63.4827	61.7853	62.5263	63.2567	63.7465	63.2041	61.8021
	34.2539	33.6247	32.6965	33.3437	33.7536	33.8615	34.1185	34.3028	33.9464	35.2727	36.1075	36.875	36.7311	36.9339	37.6423	37.662	37.0317	37.3718	38.2843	37.5895	38.8428	38.6731	38.8333	39.0437	38.1895	37.5566	37.8611	38.481	38.4163	38.3402	38.58	38.6335	40.0139	40.0271	40.0411	41.0131	41.0812	41.4574	42.2456	42.3922	43.0453	42.7736	43.208	42.3695	42.8893	43.6998	43.5089	43.6082	42.1979
	42.6432	42.134	41.3709	42.0565	42.0957	42.5638	42.5572	42.3158	42.2674	43.8071	44.5716	44.6014	45.1801	45.61	45.9327	45.9305	45.3998	44.8184	45.9319	45.8313	47.6732	47.2223	47.1731	47.6797	47.8827	47.139	47.7737	48.3994	48.5977	48.1763	49.1394	49.0525	50.695	50.2849	51.2358	52.0583	52.4407	52.3427	53.1086	53.503	54.4642	53.8875	55.0539	54.1721	55.2477	55.3159	55.8558	55.8533	54.0607
	59.7879	59.4983	58.4441	59.6384	60.0761	60.2364	60.6859	61.0022	60.6421	61.8043	63.1585	63.4773	64.0411	64.7654	65.1666	65.5419	64.5691	64.4862	65.8914	65.7112	67.2706	67.2555	67.1951	67.1158	68.7912	67.4671	67.6134	68.643	69.2231	68.4449	69.1918	69.9606	71.0405	71.708	71.638	71.981	73.0161	73.1419	73.987	74.0788	75.7346	75.2913	76.0725	75.2131	75.2305	76.5487	76.5552	77.3078	75.5922
	41.4037	40.9583	40.3354	40.7124	41.2106	41.7113	41.5144	41.9522	41.6903	42.7052	43.8409	44.537	44.3642	45.0494	45.5949	45.6357	45.0212	45.4502	46.117	45.8299	47.3472	47.3332	46.8491	47.1732	47.5009	46.3908	46.8578	47.7125	47.9753	47.6534	48.25	48.8105	49.6023	50.0367	50.331	50.7891	51.2494	51.7786	52.6135	52.9016	53.8202	54.0052	54.2664	53.4898	53.7008	54.7362	54.9433	55.1575	53.6355
	42.335	42.149	41.454	41.7944	42.5088	42.282	42.4816	43.103	42.5231	43.5844	44.6245	45.3771	45.0366	45.9965	46.5342	46.2377	45.6486	46.0673	46.8601	46.523	47.8176	47.4901	47.8332	47.6717	47.4366	46.4961	46.8908	47.9083	48.0459	47.6373	48.225	48.1911	49.4721	49.7386	49.9762	50.2892	50.9101	51.1774	51.9462	52.0119	52.9406	52.9396	53.6626	52.7675	52.7697	53.9208	53.589	53.8782	52.5141
	40.883	40.6647	39.7693	40.57	41.3325	40.9666	40.5733	41.6569	41.2101	42.5617	43.372	43.8795	43.8586	44.552	45.1138	44.8863	44.1098	44.1935	45.0468	45.5577	46.2204	46.54	46.0462	46.8262	46.2462	45.3664	45.7664	46.9065	47.4966	46.963	47.3767	47.9136	48.7343	48.5142	48.797	49.1445	50.217	50.1441	51.062	50.5375	51.7429	52.0326	52.4646	51.5586	51.9293	52.8504	52.4518	52.5218	50.8525
	53.4365	53.3356	52.6244	53.7285	54.0348	54.3592	54.6271	55.4676	55.0611	55.9629	57.076	58.1433	58.33	59.5003	60.0486	59.9304	59.4869	59.895	60.5902	60.2728	62.8257	61.5606	61.652	62.3308	64.2271	62.8714	63.7844	64.6416	64.7467	64.1257	64.9345	65.6363	66.9852	67.5764	67.3615	68.6046	68.7563	69.1639	70.0716	70.3381	71.1548	71.5859	72.1967	71.2592	71.4402	72.4102	72.2539	72.7087	70.6356
	39.5686	38.8852	38.2462	39.198	39.7865	39.8699	40.1357	40.5233	40.3344	41.4399	42.1676	43.3385	43.4086	43.8519	44.3281	44.1264	44.0623	44.3328	44.7589	44.6713	45.9038	46.219	45.9815	45.966	46.4678	45.8576	45.9142	46.5816	46.6714	46.7047	47.5363	47.293	48.4599	48.7948	49.0856	49.729	49.8489	50.7784	51.0517	51.2158	52.4465	52.6081	53.0051	51.9818	52.6743	53.0112	52.9549	52.942	51.614
	35.8447	35.8338	34.6414	35.6661	35.919	35.8969	36.0526	36.914	36.2719	37.7022	38.6244	39.1928	38.9755	40.2941	40.6142	40.6809	39.8288	40.4396	40.8249	40.5827	42.2877	41.9913	42.1712	41.99	44.2492	43.4128	43.6875	44.6493	44.4963	44.1502	44.8524	45.269	46.1002	46.6441	46.3913	47.2202	47.6218	48.2131	49.0009	48.7447	50.0312	49.8412	50.8443	49.9426	50.3568	51.0157	51.0457	51.2252	49.4688
	42.9188	43.2507	41.7952	42.6651	43.2623	43.3543	43.7356	43.9584	44.2799	45.0918	46.0307	46.8173	46.8586	47.6971	48.7297	48.5681	47.9131	47.9345	48.9729	48.8266	50.612	49.9452	50.072	50.0848	51.928	51.1005	51.3331	52.4232	52.4835	51.6513	52.1941	53.6468	54.1536	54.878	54.8025	55.1446	55.9185	56.3787	56.9668	56.9605	58.4505	58.324	59.2123	58.1074	58.4901	58.9905	59.4092	60.1863	58.267
	63.7132	62.6975	62.1799	63.0366	63.3951	64.0744	63.9422	64.5264	64.6106	65.5496	66.679	67.8515	67.8271	68.6314	69.147	69.4146	68.6348	69.3635	70.1418	70.0437	71.6195	71.3756	71.7417	71.8461	74.0037	72.7244	72.9475	74.2117	74.5512	74.3116	74.8028	75.2108	76.9125	77.0874	77.3904	78.1158	78.2567	78.7952	79.5407	79.4991	80.8919	80.9133	81.9059	80.9925	80.6797	82.3337	82.0545	82.4183	81.2644
	54.6037	54.1347	53.0276	54.1194	54.4266	55.1219	55.3226	55.8122	55.2446	56.4977	56.7601	58.3474	58.3813	59.2316	59.44	59.5438	58.3102	58.993	59.7607	59.6462	60.9233	60.988	60.995	60.8384	61.3249	59.6367	60.4541	61.1713	61.8285	60.9016	61.7617	61.7943	62.9821	63.2269	63.6206	64.3166	64.4708	65.214	65.6854	65.8	67.2392	66.996	67.7981	66.882	66.1952	68.0383	67.6404	68.2167	66.0371
	46.1493	46.1279	45.1648	45.9602	46.4619	46.1829	46.5445	47.2362	46.7654	47.9418	48.768	49.4817	49.2271	50.1757	50.9443	50.9284	49.8646	50.4715	50.7907	51.1861	52.0763	51.7482	52.0048	51.9795	53.1505	51.1697	51.7787	52.435	53.2469	52.5178	52.8578	53.5477	54.8767	55.4324	55.3553	55.8562	55.9935	56.6761	57.2129	57.7096	58.2746	59.0134	58.8227	58.2178	58.1503	58.9564	59.3615	59.6858	57.6208
	25.3029	24.964	24.0924	24.2208	25.425	24.9816	25.5211	25.53	25.568	26.6423	27.6187	28.2252	28.0528	28.8081	28.9329	29.2724	28.9873	28.9504	29.4569	29.8016	30.4859	30.5228	30.5576	30.3121	33.7678	32.7743	33.116	33.9109	34.1129	34.1448	34.6034	35.0026	35.3923	36.0836	36.0797	36.5495	37.5378	37.2793	38.3338	38.0822	39.0145	38.9112	39.3932	38.3356	38.7961	39.687	39.4414	39.9391	38.6221
	40.1042	39.5273	38.4499	39.3129	39.7137	40.2819	40.4137	40.9001	40.6139	41.4879	42.3338	43.3609	43.223	44.0088	43.9985	44.1975	43.7871	43.8525	44.8159	44.7161	46.2254	45.8686	46.194	45.925	51.0498	49.6792	50.196	51.7202	51.3771	51.2708	51.313	52.2515	52.854	52.9625	53.3624	54.2498	54.6195	54.907	55.7696	55.5146	56.4605	56.6561	57.069	56.393	56.6382	57.6695	57.2979	58.0897	56.3784
	34.7879	34.4393	33.6365	33.8206	34.5093	34.5895	34.9025	35.4225	34.6426	35.7734	37.2081	38.1423	37.5134	38.6332	38.9148	39.0166	38.5486	38.5808	39.4727	39.472	40.6391	41.1564	40.5098	40.3612	40.4397	39.4441	40.0738	40.5671	41.1301	40.8507	41.2538	41.7947	42.8597	42.7756	42.9779	43.992	44.2713	44.4751	45.05	45.2428	46.3512	46.1849	46.8573	46.0404	46.0658	47.2227	47.5776	47.5589	46.2598
	37.6287	37.2249	36.4165	37.1752	37.6156	38.0893	37.7546	38.6551	37.8121	38.7332	39.5887	40.4691	40.786	41.6273	42.057	42.2643	41.1857	41.9744	42.9259	42.7119	43.9306	43.4982	43.5719	43.5446	45.3196	44.5561	44.2751	45.0895	45.924	45.5126	46.0379	46.7082	47.8246	47.6796	48.1972	48.8334	48.9424	49.2625	50.0779	50.0319	51.2272	51.1049	51.7183	51.4564	51.0331	52.1476	52.8804	52.4753	50.8856
	39.8266	39.5429	38.7496	39.3984	40.436	40.0676	40.4204	40.9498	40.7237	41.4633	42.5452	43.6134	43.4553	44.5425	44.868	45.157	44.1977	44.6951	44.9079	45.2388	46.1472	46.0696	46.1931	46.0046	46.8285	45.9121	46.3731	47.0168	47.317	47.3021	47.4568	48.2083	48.7935	49.125	49.0865	50.5025	50.4778	51.0609	51.6455	51.4916	52.4584	52.5238	53.392	51.8657	52.7946	53.1041	53.5354	53.5267	51.8278
	44.2453	43.7756	42.6246	43.4274	43.7421	44.0575	44.195	44.5601	44.2709	45.5123	46.3711	47.466	47.0192	48.4696	48.6581	48.885	48.0382	48.2683	48.9994	48.991	50.6894	50.8157	50.373	49.996	51.1316	50.1069	50.2274	51.2484	51.8054	50.8694	51.761	51.5172	53.1002	53.3199	53.7779	54.6048	55.0602	54.9123	55.5928	55.6468	56.5979	56.8272	57.4067	56.7495	56.4395	58.1208	57.2552	58.3656	56.2982
	34.2241	33.9734	33.4711	34.5648	34.569	34.3924	34.9514	35.0306	34.884	36.3875	36.477	37.4696	37.7666	38.706	39.0536	38.9151	38.071	38.5876	39.8517	39.5179	40.9718	40.3172	40.6705	40.4634	41.3784	41.3906	40.6234	42.0366	41.7102	40.8906	41.9508	41.4286	43.2039	43.2895	43.8292	44.232	44.5595	44.935	45.3457	45.5452	47.1066	47.1586	47.1837	46.546	46.69	47.9777	47.3312	48.494	46.7606
	36.6793	36.388	35.5285	36.313	36.907	36.937	37.0253	37.3263	36.7608	38.1477	38.8032	40.1529	39.4194	40.9882	41.3972	41.38	40.7437	40.5202	41.4005	41.6096	42.7529	42.4599	42.3696	42.8007	43.3568	42.2245	42.6477	43.1569	43.2941	43.1365	43.6856	44.2349	44.919	45.1231	45.1812	46.2646	46.7801	47.1005	47.8004	47.7973	48.7701	49.0251	49.4803	48.3935	48.8163	49.4228	49.6184	50.0957	48.1695
	62.3883	61.9603	61.6073	62.848	63.093	63.1676	62.4749	63.7207	62.9693	64.5346	64.6249	65.8646	66.1946	66.7744	67.9843	67.9777	67.0632	66.9876	68.1065	67.8772	69.581	69.1072	69.0961	69.4994	69.2306	68.0112	68.1499	70.0461	69.4448	69.337	69.3906	69.5234	71.2467	71.1329	70.4883	72.5271	72.9733	72.2717	73.1557	72.7591	73.6006	74.5424	75.4399	73.4765	73.2657	74.6945	74.6973	74.9702	72.8237
	61.4701	60.1994	60.1447	61.0427	61.6282	62.6861	62.5308	62.9509	62.5325	64.0446	64.3546	65.1608	65.9764	67.1871	67.168	67.2071	66.1648	66.7051	67.6129	67.5643	69.5925	68.9327	70.0051	69.9945	71.0813	69.2366	69.5725	70.6871	70.6925	71.3649	71.0889	71.2375	72.6999	73.3439	73.2794	74.7199	75.1811	75.2143	75.8979	75.5549	77.0711	77.6807	77.4493	76.0635	77.7129	78.4424	78.1258	78.4117	75.9203
	32.4186	31.7854	31.5359	31.8727	32.7083	32.5888	33.0743	33.1268	33.2137	34.5941	34.8486	35.7383	35.3194	36.7089	36.642	36.5875	35.7849	36.7526	37.2571	37.3626	38.1761	38.1168	38.2703	37.8791	38.9053	38.0334	37.747	38.9637	39.2614	39.5025	39.5344	39.8663	40.7277	40.8737	40.961	41.2155	41.827	41.993	42.6569	43.4621	44.8077	44.7772	44.7712	44.3789	44.7539	45.3468	45.8338	46.1789	43.9563
	42.312	42.2079	41.6574	42.5069	43.092	42.6918	43.065	43.8353	43.3327	44.7588	45.5115	46.3171	46.2144	47.0718	47.6489	47.2688	47.2156	47.1393	47.8266	47.6724	49.0883	49.0626	49.018	49.9794	52.3893	50.5678	51.1969	51.578	51.8954	51.4146	52.007	52.2121	52.8795	52.9397	52.8155	54.0945	54.6197	54.2971	55.0214	55.0475	55.795	55.3473	55.9321	54.5402	55.2108	56.0049	55.8615	56.2191	54.3856
	42.8352	42.6964	41.7282	42.1467	43.3048	42.8367	42.7168	43.0216	42.8538	44.1874	44.784	45.8176	45.3614	45.7833	46.6563	46.4327	45.9346	45.8008	46.623	46.4513	48.3048	47.358	47.1246	47.2709	47.2012	46.0087	46.0006	46.729	47.2013	46.747	46.7752	46.9537	48.2232	48.5367	48.8752	48.8245	49.6253	49.885	50.1377	50.1338	51.0694	51.1639	51.6092	50.1897	50.6555	51.3125	51.3664	51.6338	49.8193
	29.3402	29.2422	28.5162	28.6501	29.3444	29.5595	29.8543	30.1177	29.9793	31.2858	31.8234	32.8156	32.4515	33.2386	33.5511	33.5841	33.2353	33.2254	33.8636	33.7188	35.1065	35.0041	34.7566	34.6635	35.4574	34.2454	34.3524	35.169	35.2989	35.159	35.9157	35.7951	36.6268	37.1329	37.0768	37.9739	38.1469	38.7231	39.552	38.8587	40.4112	40.2257	40.601	40.0466	40.0263	40.8899	41.2698	41.2745	39.6657
	81.3055	80.9488	79.8659	80.6221	81.3675	80.9793	81.9205	82.1081	81.3591	82.9494	84.5737	85.2157	85.224	86.0418	86.0792	86.3458	85.3487	85.7979	86.0698	85.6834	88.8267	87.8177	87.089	87.5565	87.936	86.4231	86.8671	86.9215	88.3294	87.2471	87.8036	88.4565	89.3967	89.5741	89.8729	90.9661	91.5168	92.0498	92.2465	92.2205	94.0566	94.7735	95.2509	93.2876	94.4471	95.1765	94.6613	95.7814	92.5789
	51.4423	51.5191	50.3345	50.261	51.5677	51.8551	51.6413	52.5529	52.1737	53.4035	54.6822	54.9664	55.2752	55.8991	56.8288	56.6882	56.008	56.2527	57.0267	56.6856	58.1624	57.9717	58.1127	58.4209	60.8683	60.1228	59.9909	61.1302	61.5806	61.4206	61.907	61.775	62.9586	62.4952	63.1076	63.983	63.6953	65.0367	65.0527	65.2254	65.9398	66.5413	66.7398	65.9468	65.8952	66.1832	67.155	67.0347	65.3466
	14.4166	13.0625	13.6412	13.0529	12.1635	10.7193	10.8091	10.8611	10.1137	9.94063	8.68582	9.78794	9.57447	8.84468	7.8942	8.10282	7.97012	8.18617	8.6255	8.13003	8.65572	7.9538	9.19414	8.46786	9.18259	9.2157	9.13041	10.0162	9.91455	10.5916	10.8326	11.9499	12.4659	13.1924	14.7165	14.8154	15.4352	16.2574	17.2753	18.1628	18.6011	19.3945	20.7926	21.3222	22.7918	24.1313	23.7551	25.4569	26.8338
	21.3773	19.7077	20.6576	19.5382	18.6967	17.0662	16.7832	16.7871	16.1098	15.709	14.8981	15.2914	15.1924	14.6541	13.8064	13.4657	13.4239	13.6612	14.2302	13.9274	14.3291	14.0103	14.7102	14.4774	14.8039	14.7409	14.6036	15.4709	15.3353	15.9385	16.3406	17.4254	18.3945	19.2137	20.7611	20.9776	21.6338	22.8635	23.4996	24.9123	25.2999	26.878	27.9551	28.911	30.4549	31.283	31.5438	33.1703	34.6804
	22.3186	20.5893	21.2364	20.6647	20.0811	18.0646	17.9144	17.9687	17.2656	17.0314	16.1849	16.9281	17.0422	15.9401	15.1438	15.001	15.0532	15.4579	15.8208	15.1722	15.6527	15.3502	16.0345	16.1319	16.0384	16.1341	15.8868	16.7316	16.4413	17.3837	17.2639	18.4702	18.9512	19.397	20.9858	21.2067	21.8002	23.0436	23.5135	24.9732	25.6105	26.9529	28.018	28.8991	30.4161	31.9265	31.9796	33.5056	35.2944
	28.731	27.0167	27.9355	26.7692	26.3059	24.6043	23.8213	23.9356	22.7907	22.9243	21.6115	22.6843	22.1423	21.2549	20.3016	20.0627	20.1146	19.9963	20.5812	20.1975	20.7823	20.5041	21.3084	20.74	20.5173	20.5434	20.0536	21.1073	20.7593	21.595	20.7022	21.961	22.94	22.7378	24.147	24.2088	25.3216	25.6523	26.2091	27.4711	27.2589	28.4036	29.3827	30.2293	31.6339	32.3386	32.1122	34.0723	35.3354
	28.6249	27.1009	28.0717	26.8631	26.2134	24.1864	24.3602	24.4298	23.7046	23.9278	22.2988	23.0441	23.2524	22.6407	21.8553	21.8173	21.5479	21.4431	22.2809	21.5235	22.2477	21.9604	22.5452	22.2349	22.8618	22.8358	22.3576	22.857	22.8462	23.5386	22.6432	24.0445	24.2965	24.4383	25.3877	25.3905	25.9992	26.641	27.0547	28.0427	27.9379	29.0899	29.5626	30.5138	31.9872	32.7043	33.5286	34.3481	36.1407
	27.2997	25.4962	26.4915	25.4388	24.5883	22.7361	22.8185	22.9462	22.1818	21.7022	20.7889	21.6187	20.8871	20.806	19.5103	19.8048	19.1855	19.3665	20.2651	19.4887	20.1355	19.7071	20.389	20.0622	19.8977	19.5543	19.3121	19.8849	19.9709	20.3702	20.1087	21.6427	21.5062	22.2937	23.4528	23.4729	23.5891	24.3423	25.1756	26.0034	26.3414	27.2101	28.0488	28.2837	29.6787	30.6488	30.3374	31.6206	32.7594
	25.9764	23.6368	24.5307	24.067	23.4406	21.4223	21.4469	21.3197	20.5297	20.2511	19.3677	19.9798	19.716	18.7821	18.3024	18.0875	17.9554	18.2488	18.3975	17.8472	18.4999	18.0287	18.6519	18.9831	18.9339	18.5445	17.9681	19.1801	18.8587	19.5345	19.2235	20.2412	20.3456	21.2057	22.3268	22.3315	22.7082	23.8207	23.5583	25.2776	25.0178	26.1714	27.1081	27.5567	28.585	29.9409	29.9241	31.0268	31.972
	24.6347	22.5853	23.3607	22.2999	21.318	19.545	19.3103	19.6699	18.5541	18.416	16.598	17.7087	17.542	16.2841	15.7732	15.7838	15.2498	15.3295	15.8671	15.1563	15.6323	15.624	16.0061	15.8516	15.5749	15.2503	14.8177	15.7177	15.4167	15.8016	15.7022	16.6531	17.3272	17.6892	19.0247	19.2611	19.5967	20.1492	20.8172	21.9433	22.0672	23.2204	24.4049	24.9852	25.7403	26.6355	26.984	28.044	29.4708
	28.0797	26.2884	26.6632	26.2516	25.1757	23.7573	23.1972	23.7316	22.6062	22.6569	21.6006	22.228	22.3306	21.4061	20.6945	20.2073	20.1728	20.3038	20.8853	20.4686	20.8371	20.6531	21.6243	21.0971	21.0726	20.7899	20.8185	22.071	22.1106	22.5746	22.64	23.8117	24.8036	25.6947	27.4531	27.7209	29.042	29.8803	31.0463	32.5945	33.3587	34.9631	36.6269	37.796	39.7044	41.2182	41.9146	43.7958	45.0713
	17.4999	15.2838	15.8326	14.6929	14.2549	12.5024	11.8144	12.077	10.8975	11.1386	9.82061	9.78135	9.26781	8.84853	8.07673	8.355	8.07785	8.181	8.5793	7.97674	8.41374	8.35475	8.91759	8.46322	8.00342	8.04766	7.32753	7.8544	7.91235	8.53098	8.54991	9.41072	9.98965	10.7369	11.7915	11.9731	12.7175	12.9913	13.8081	14.4628	15.4131	15.9864	17.4588	18.4227	19.1535	20.1427	20.0718	21.6186	22.6328
	16.4729	14.5908	15.6519	14.8094	13.6781	11.905	12.1398	12.4767	11.7074	11.6742	9.99297	11.045	10.8098	10.0057	9.21362	9.31698	9.02758	9.42639	9.96984	9.43107	9.93056	9.61319	10.257	10.0104	9.96798	9.96507	9.63378	10.5025	10.4517	10.9481	10.7929	11.9473	12.5236	13.35	14.5509	14.9923	15.5878	16.1826	17.418	18.7313	19.0908	20.0861	21.1656	22.2852	23.8151	25.1031	25.209	26.4048	28.0803
	26.3443	24.8109	25.4812	24.8401	24.2285	22.4285	22.0532	22.2333	21.2781	21.1672	20.1272	21.2731	20.9075	20.0789	19.3391	19.0871	19.0027	19.2282	20.2877	19.7875	19.9793	19.8763	20.442	20.4491	20.3413	20.4064	19.9932	20.8606	21.1315	21.2769	21.8011	23.2468	23.4998	24.4287	25.9279	26.2734	27.7649	28.2751	30.0843	31.3551	31.751	33.0502	34.8601	35.8744	38.0381	39.1539	39.7444	41.7026	43.8594
	23.7401	22.1392	22.2331	22.5469	21.2543	19.8809	19.0934	19.3462	19.264	18.521	17.564	18.4759	18.2577	17.1757	16.8528	16.863	16.3568	17.1901	17.6232	17.2953	17.402	17.5327	18.1359	18.0035	17.9169	17.5059	17.9806	18.7891	18.8697	19.4208	19.9736	21.5326	22.5476	23.0852	24.3137	24.9693	25.8308	26.899	27.9222	29.6777	30.7636	32.0911	33.2933	35.0199	36.7226	38.2537	38.7975	40.6205	42.7059
	31.0104	29.3383	29.9999	29.1179	27.9846	26.853	26.4822	26.8896	25.8807	25.6304	24.6345	25.5811	25.1572	24.2771	23.4528	23.3078	23.3179	23.3157	24.3142	23.8446	24.3192	23.7238	24.9004	24.3286	24.7502	24.7257	24.201	25.0308	24.6702	25.244	25.5147	26.9511	27.6883	28.1159	29.7474	30.1355	30.5665	32.3017	33.7842	35.2696	35.622	37.6687	39.4899	40.387	42.1047	43.8789	44.1951	46.2505	48.2197
	22.8928	20.9536	22.0619	20.8754	19.9387	18.1721	18.4485	18.5814	17.8158	17.4909	16.4477	17.3983	17.2119	16.3113	15.7167	15.5518	14.7299	15.2055	15.811	15.3776	15.9649	15.6948	16.4533	15.9234	16.5373	15.7922	15.7604	16.6194	16.5256	17.1203	16.7787	17.4228	17.8872	18.5016	19.4211	19.2223	19.6174	20.3805	20.8321	21.7585	22.2905	22.9677	24.1875	24.7231	25.8993	26.8494	26.6385	28.0072	29.3904
	15.1851	13.1582	13.9427	13.215	12.2525	11.09	10.8554	11.3646	10.3442	10.4318	9.33836	10.1361	9.41834	8.90758	8.13805	8.27824	8.14037	7.8875	8.61938	8.36363	8.78858	8.65858	9.13601	8.87415	10.043	9.86909	9.34418	10.0125	10.0111	10.2785	10.4283	11.4875	11.8041	12.2281	13.4903	13.3076	14.1166	14.9847	15.6794	16.6208	17.0714	18.3327	19.1336	20.3702	21.8153	22.7497	23.0056	24.4966	26.0532
	20.9052	19.1039	20.2912	19.1128	18.1458	16.5497	16.1681	17.1914	16.2694	16.0248	14.9772	16.0057	15.3228	14.2933	13.7604	14.1115	13.2591	13.5776	14.2965	13.5437	14.2605	14.1462	14.794	14.8168	15.2073	15.3555	14.8097	15.4356	15.2439	15.7711	15.3403	16.337	16.433	16.6808	17.6064	16.9208	17.9541	18.505	18.6438	19.9019	20.3021	21.1285	22.0266	22.4275	23.7594	24.559	24.3071	25.7874	27.0261
	30.4341	28.931	30.2153	28.915	27.8467	26.3225	26.2029	26.4708	26.0637	25.7694	24.5898	25.3905	25.4491	24.535	23.9977	23.4654	23.1721	23.8849	24.3768	23.778	24.2459	24.2056	24.8453	24.7678	24.5666	24.2988	24.3357	25.1113	24.5814	24.8369	24.6577	25.5335	26.1194	26.3719	27.0235	26.4867	27.0213	27.9916	28.5339	28.7666	29.2682	29.7955	30.1598	30.6188	31.9641	32.7987	32.2215	33.7049	34.2602
	36.6112	35.5867	36.5463	37.3036	36.9693	38.1209	37.6268	38.0321	37.7104	37.589	37.9842	38.092	38.0378	38.4317	38.3179	38.6165	39.2199	38.8512	40.1269	40.4937	40.3698	40.8125	40.8705	40.9845	40.2423	41.8845	42.8113	43.5918	44.7905	45.9939	47.1494	48.2409	49.4972	50.4887	50.6537	51.1388	51.3981	52.464	53.6461	53.9923	54.3759	55.0296	54.974	56.4164	57.4118	57.3968	58.8141	59.6327	59.5658
	33.0716	30.7242	32.5865	33.2708	33.2375	34.5651	33.7551	34.2231	34.0021	33.5222	34.0542	33.9394	34.5902	34.7462	34.7472	34.9329	35.8599	35.488	36.7267	37.274	37.1183	37.4756	37.654	37.9048	36.7134	38.2936	39.506	39.919	41.1556	42.3568	43.4057	44.7209	45.847	46.5703	46.7986	47.3229	47.4623	47.5467	49.0536	49.6791	49.774	50.507	50.2373	51.5049	52.5629	53.4652	54.3494	55.133	54.5047
	24.4884	21.3704	24.2295	24.6149	24.9506	25.644	24.7075	25.5166	25.4618	25.1788	25.5221	25.4405	25.7759	26.1821	25.964	26.5623	27.5173	26.4076	27.4551	28.3029	27.8619	28.8097	28.615	28.8422	27.0809	28.2953	29.453	29.6767	31.3147	32.5628	33.4368	34.8316	36.0006	36.9413	37.0515	37.5538	37.7717	38.8621	39.9924	40.7964	40.6263	41.1075	41.491	43.2917	44.1943	44.5215	45.7971	46.1624	46.3964
	31.6046	29.718	31.4164	32.4638	32.2731	33.4125	32.3492	32.6084	32.6084	32.3533	32.4205	32.7614	32.7228	32.9603	33.3192	33.7168	34.6161	34.7226	35.2341	35.4974	35.3565	36.1642	36.1335	37.9467	36.9065	37.7292	39.4742	39.8543	41.3647	42.6258	43.4527	44.656	46.6027	47.239	47.1889	48.0727	48.4148	49.1744	50.6699	51.3626	51.9327	52.3979	52.955	53.9532	55.2879	55.8081	57.0341	58.1719	57.9094
	24.224	22.1878	24.3962	25.0582	24.8725	25.78	25.1202	25.7289	26.0003	24.5867	25.216	25.8909	25.3955	26.0436	26.0476	26.034	26.6221	27.0129	27.8609	28.0948	28.1304	28.6332	28.7066	28.9116	28.1706	29.0097	30.1652	30.6886	31.5561	32.0959	32.9938	33.8994	34.5572	34.7159	34.8609	35.0811	34.9331	35.2363	36.4563	37.0905	36.6518	37.0338	36.7644	38.2192	38.5031	38.965	39.7647	40.4716	40.3101
	22.2877	19.6803	22.3818	22.5897	22.6227	23.6951	23.3909	23.5976	22.7368	23.1326	23.0239	23.479	22.9772	23.6634	23.6278	23.6334	24.8134	23.9867	25.7185	25.5828	25.2746	26.1301	26.3593	25.6206	24.9335	26.3723	27.8322	28.2567	29.7074	30.4458	31.3343	33.0009	34.2205	34.9714	35.6001	35.8049	35.7876	36.5343	38.2411	38.2084	38.6151	39.3257	39.4373	40.5886	41.5881	41.9567	43.0527	44.445	43.9864
	23.6455	23.2217	23.9338	24.3907	24.4223	25.4596	25.0556	25.7236	25.5797	24.8097	25.7145	25.9805	25.8569	26.2438	26.002	26.4163	26.9949	27.059	27.9888	28.5206	28.2276	28.4309	28.838	30.0116	29.8758	31.4149	34.1813	34.8365	36.7031	38.5898	40.4109	42.3113	44.368	46.2838	46.6528	47.7122	48.3294	50.044	51.6506	52.2498	52.6938	54.2103	54.3365	56.7846	58.0351	58.5955	59.2246	61.7737	60.3032
	13.1167	12.8733	13.501	13.9427	13.9239	14.9536	14.4094	14.8746	14.7205	14.2883	15.0127	14.659	15.2414	15.2202	15.2961	15.223	15.9244	16.033	17.0132	16.9485	16.8078	17.3864	17.8813	17.1336	16.2842	17.9034	18.8576	19.6747	20.8348	21.5369	22.0429	23.2047	24.5252	25.004	25.4192	25.6859	25.8568	27.0499	28.1877	28.3488	28.7206	29.0577	29.5924	30.1661	31.4716	31.7324	32.4548	33.1852	33.0534
	11.2299	9.21585	11.0923	11.5811	11.2031	12.6312	11.8364	12.3614	12.5551	12.3153	12.6181	12.7571	12.5812	13.4539	13.0845	13.1124	14.3091	13.7665	14.1335	14.9399	14.8636	16.3484	15.9382	15.9169	15.8744	17.2469	19.1929	20.3221	22.0542	24.083	25.4096	27.1262	28.5157	30.6865	31.5433	32.9303	33.0762	34.289	36.4948	37.9241	38.6253	38.9913	40.4401	42.0657	43.2711	44.2834	45.6225	47.0875	47.0235
	18.7754	17.9984	19.0674	19.3872	19.5334	20.5008	20.2516	20.2833	20.8253	20.163	20.5732	20.2899	20.2207	20.7645	20.8225	21.2901	21.9524	21.3796	22.6391	22.4864	22.8203	23.357	23.3416	23.7918	23.437	23.7737	26.2567	26.7304	28.2727	29.9371	31.5409	33.7611	35.8623	37.7227	38.8472	40.6836	41.4125	43.3179	45.8817	46.6086	48.3494	49.0971	50.1571	52.1785	54.2119	55.0798	57.248	58.0314	58.2063
	21.3427	21.0027	21.3604	21.8234	22.7371	23.092	22.6025	23.1271	23.1852	22.9639	22.9418	23.1623	23.26	23.8056	23.3996	23.9018	24.6196	24.5636	25.5592	25.8794	25.4994	26.6799	26.7602	27.8885	26.838	28.4673	30.4031	31.5497	33.4876	35.163	37.2634	39.0245	42.1777	44.2487	45.2976	46.8241	48.6486	49.8921	52.9214	54.1503	55.5405	57.4507	57.9341	60.5988	62.9162	64.1877	65.5342	68.3678	67.4527
	30.7344	28.3723	30.5242	30.8163	30.9272	31.8668	31.3072	31.5642	31.2642	31.1618	31.8015	31.3905	31.6844	32.0676	32.0368	32.3162	33.3234	33.2168	34.2078	34.1249	34.501	34.6396	34.9793	33.9535	33.172	34.3876	35.5512	35.8367	37.1664	38.2098	38.5811	39.7672	41.2026	42.1595	42.3458	43.019	42.8828	44.0974	45.2218	45.5059	46.3651	46.7714	46.8383	48.3851	49.5269	50.4833	50.9032	52.1917	51.5096
	32.6627	32.8765	33.4787	33.6718	33.458	34.8682	34.1995	34.6642	34.45	34.1065	34.5759	34.6823	34.7322	35.3508	35.0234	35.4512	36.4094	36.2413	37.0636	37.0905	37.4029	37.9155	37.8311	38.3141	37.4665	38.7221	40.5585	41.252	42.7224	44.2658	45.0376	47.0759	48.4147	49.5627	49.883	50.7027	51.3693	51.6985	54.2674	54.971	55.2404	56.2007	56.2232	58.2827	59.3099	60.0186	61.2133	62.6904	62.095
	37.7492	35.6984	37.1207	37.422	37.673	38.774	38.1036	38.5849	39.1308	38.4852	39.4094	39.3973	39.1627	39.5289	38.9032	39.8697	41.0557	40.9228	41.2038	41.5508	41.5417	42.6317	42.8763	44.005	43.2969	45.2184	47.2922	49.3708	51.967	55.1662	57.8851	60.8943	63.8734	67.0021	69.1204	70.4139	72.8294	74.3761	77.5991	79.5744	81.2579	82.4755	84.058	86.5249	89.0798	89.5444	92.1275	94.5746	94.9002
	20.3276	19.9425	20.3533	21.0422	20.7462	22.4236	21.6057	21.9647	21.4358	21.0679	21.6243	21.7965	21.9018	22.1236	22.0841	22.5337	23.0379	22.9632	23.7473	23.8703	24.1642	24.6294	25.1908	23.7321	23.625	24.2386	25.6863	26.0783	27.0748	28.1976	29.0262	30.1921	31.5631	32.9097	32.7789	33.7728	33.7892	35.1696	37.4737	37.7031	38.4245	38.7815	39.603	41.3719	42.5223	43.3044	44.3899	46.0577	45.6491
	17.103	16.4431	17.0105	18.0333	17.4623	18.6447	18.3919	18.5494	18.4534	17.8102	18.4381	18.0735	18.2743	18.809	18.0175	18.8262	19.3162	19.304	20.0177	20.4155	20.6473	20.8228	21.3717	20.7614	20.2857	21.645	23.2992	23.671	25.3601	26.7457	27.9397	29.5004	31.2291	32.5736	33.4814	34.0733	35.0085	36.1968	38.0011	39.425	40.3311	40.7418	41.6075	43.7956	45.3818	46.1554	48.3436	49.7456	49.9371
	21.9128	21.2892	22.1547	22.3991	22.465	23.7983	23.0034	23.5326	23.4958	22.9941	23.6261	23.8723	23.8477	24.2128	23.9329	24.6742	25.4881	25.2428	26.2984	26.9174	26.3713	26.7365	27.1905	27.7452	26.7304	27.8055	29.9653	31.0695	32.5505	34.3324	35.5543	37.1193	38.9292	39.6323	40.4569	41.6677	41.9637	43.3653	44.8373	45.1232	46.0855	46.6257	46.9195	48.2478	49.9353	50.1812	51.4034	52.4166	52.0584
	11.8841	11.1571	12.1683	12.5455	12.7628	13.6422	12.8126	13.2736	13.2005	13.1196	13.3369	13.159	13.702	13.8181	14.0396	14.1936	15.8499	14.9998	15.7139	15.9721	15.8945	16.2825	16.5281	16.767	16.0292	16.8074	18.2187	18.6998	20.1789	21.4015	22.0793	23.8169	25.8419	26.6913	27.814	29.0896	30.0378	31.2473	33.7011	34.7891	35.9161	37.0158	38.0285	39.9047	42.2946	42.967	44.7727	45.9691	46.4866
	26.5754	26.495	27.107	27.4551	27.7047	28.7277	28.5387	28.6	28.4211	28.3824	28.5292	28.5462	28.9151	29.3556	29.5236	29.4789	30.5685	30.4014	31.0649	31.7151	31.4352	31.876	32.2893	32.7619	32.1065	34.36	35.9532	37.5203	39.6201	42.2298	44.4946	47.2379	49.474	52.2198	53.6171	55.2504	56.8042	58.1638	61.1655	62.3533	63.2482	64.1026	64.562	67.2257	68.4387	68.9934	70.3883	71.6569	71.8728
	81.3325	83.7473	84.109	84.4885	83.8239	86.8256	85.9891	86.2737	86.2057	86	86.7961	87.3358	86.0937	87.4863	86.9001	86.8865	87.567	87.5222	90.3463	88.9622	89.534	89.6379	89.9749	91.379	89.4988	89.4238	92.5714	93.2161	96.748	98.7864	100.188	103.87	105.96	109.166	111.2	111.118	113.454	114.568	118.453	119.549	119.997	122.902	123.356	126.145	127.611	129.813	131.751	133.918	134.477
	30.7615	29.2999	30.5049	30.6298	30.7469	31.7782	31.4613	31.7736	32.0142	31.6421	31.7174	32.3471	32.3034	32.5561	33.2344	32.5742	33.7684	33.5196	34.7973	34.8009	34.5485	35.3747	35.7587	35.5559	34.3246	35.9472	37.3963	37.9467	39.2677	40.9168	42.8274	43.7423	46.2666	47.3092	48.8211	49.4245	50.3679	52.3862	54.6091	56.1739	57.2127	58.1198	59.0685	62.1522	63.0129	64.5601	65.7632	67.7042	67.3614
	20.2528	24.3199	22.9924	23.3718	21.4293	21.1344	23.2622	20.5536	18.0638	16.086	14.8476	16.172	14.8124	16.7379	15.6654	16.5106	17.6345	17.952	17.0866	16.2173	17.5197	17.9353	16.9722	17.877	20.0973	24.7228	24.7121	26.8955	27.4028	29.242	29.7244	31.2005	31.3526	32.5202	34.5646	35.4526	38.6238	39.8635	40.9184	40.6761	43.4425	44.8547	45.6307	48.8851	48.9371	47.745	48.5163	49.0865	49.7123
	10.6642	14.1464	13.7342	13.9372	12.2547	11.8278	12.8224	11.4068	8.8008	7.18921	6.34083	7.18448	5.6299	7.36686	7.14893	7.33736	8.57119	8.88723	7.03724	6.67787	8.55494	8.71633	7.39777	7.65565	9.66805	14.2807	13.6401	15.6787	16.4332	18.4612	18.5024	20.6939	21.2861	22.8867	24.1143	26.2414	29.8257	30.8464	32.9762	33.9963	37.3211	38.8531	41.313	46.4922	47.1378	46.8041	49.2863	50.4333	52.58
	12.7873	16.3951	15.5915	15.3902	15.8072	14.803	16.0303	13.8688	12.0843	10.3605	10.0578	11.1277	9.40429	11.2477	11.0412	11.4317	13.2515	13.2694	11.4051	10.8576	12.7203	12.5928	10.6735	11.1932	10.9857	15.2919	14.6054	16.677	16.6061	18.5413	18.6751	20.8667	21.2534	22.8109	24.3786	26.5491	30.3594	31.2517	34.6074	34.9209	38.3117	39.6397	41.384	45.842	46.2321	46.7735	47.3037	48.3556	50.6816
	15.1876	18.8747	17.6367	18.0766	17.0041	15.6526	17.9483	15.12	12.2604	10.9979	9.44134	11.8576	10.3727	11.5577	10.7492	10.6638	13.019	13.0528	11.9603	11.3917	12.9684	13.387	12.8874	13.4177	17.0514	22.2244	21.7127	23.8188	24.8676	27.2081	27.9956	29.5028	31.2518	32.6891	34.8242	36.429	39.6982	41.0763	43.7565	44.3201	46.9703	49.5642	52.584	57.3056	57.8603	58.0562	58.9884	60.5301	62.5327
	6.55241	10.6332	9.92579	10.5084	9.84789	8.62781	10.7484	8.27852	5.98515	3.86684	3.47207	5.28918	3.51455	5.08486	4.29077	4.76292	6.57074	6.36753	5.14571	4.62446	6.06213	6.14896	5.14164	5.1567	7.3043	11.3897	11.3108	13.1409	13.4452	15.2473	15.435	16.7172	17.0107	18.8136	19.3782	21.0088	24.9327	25.3257	27.2088	28.0817	30.5356	31.6978	34.3063	38.3566	39.0939	38.304	40.5981	40.5011	42.8095
	16.7522	20.4518	19.171	18.696	18.4679	17.2671	19.575	16.9543	13.8637	12.5507	10.6316	12.3787	10.1755	11.9993	11.5905	12.7375	13.0657	14.511	13.1793	12.4446	13.8413	14.0453	12.4477	12.9445	16.9919	20.5083	21.7316	23.1793	24.117	25.2039	25.3038	27.3382	26.4749	28.4779	29.2729	29.9945	33.0493	33.651	35.3528	35.354	37.7033	38.7307	39.2656	42.4645	42.963	41.6957	41.9706	43.6228	44.2896
	22.2057	26.1849	24.3438	25.1229	23.636	22.8136	24.5943	21.9588	19.4801	17.7013	17.1937	17.4803	16.3103	17.1068	17.6676	17.9733	19.5354	20.303	17.7522	18.6518	19.9386	20.3775	19.3292	19.5522	22.9487	28.0131	27.9334	30.3123	30.8974	33.4647	33.5523	35.5766	36.3874	37.8929	37.8339	40.5063	44.0082	44.3876	46.2778	46.0733	49.4977	50.6914	51.8903	56.3585	55.7325	55.4563	56.1863	56.8693	58.6414
	20.9874	24.7427	23.1593	22.7657	22.6449	21.8292	23.8355	21.0782	17.8563	16.078	14.9945	16.0574	14.2142	16.2555	15.3039	15.4091	17.8288	17.9018	16.6167	16.506	18.5779	18.4544	17.5318	18.0217	21.9128	26.496	26.4995	28.4244	29.1526	31.2377	31.533	32.3217	33.1295	34.9409	35.5115	37.1773	40.6469	41.0586	42.9686	42.0388	45.0515	45.8982	47.3066	50.8169	50.9255	49.0757	50.1411	50.2914	51.8198
	17.8633	21.7437	20.1117	19.4128	19.2747	18.9455	19.4535	16.8199	14.091	12.3075	11.105	12.747	10.8418	11.9846	11.9164	12.3979	13.9045	14.7364	12.6773	12.4209	14.2956	15.3968	14.326	15.3312	18.6052	23.3199	23.3175	25.9831	27.3119	29.0596	29.4306	31.7199	31.8751	33.8639	35.1063	36.727	40.2694	41.1453	42.3251	42.982	45.8514	47.1378	49.0392	53.4064	53.8822	52.7592	53.5993	54.4031	55.6089
	27.9074	31.26	29.9197	29.7986	28.7782	27.4437	29.6271	26.9507	24.0441	21.4702	20.9341	22.2494	20.0698	21.7731	21.8318	22.073	23.5647	24.1711	22.8793	22.6643	24.428	24.5327	23.6972	24.3685	29.3206	33.8108	34.143	36.5248	37.0063	39.6247	40.1672	41.7181	42.2591	44.5021	45.5719	47.4163	51.4379	52.2021	54.0385	54.5312	57.7338	58.9548	60.2183	64.9084	64.4269	63.466	63.8516	64.6059	65.3734
	15.6122	19.5554	18.4316	18.576	17.7658	16.9192	18.7598	16.1223	13.6841	12.3771	11.11	12.9307	11.4491	12.6253	12.4553	13.5647	14.9526	15.1129	13.0716	12.9147	14.2344	14.375	12.5553	12.5816	12.0442	16.3522	15.7767	16.3087	16.4517	18.0484	17.5148	18.229	17.6307	19.4294	19.0241	20.2588	23.4505	23.6951	24.9233	24.5124	26.8828	27.387	28.2558	32.2479	32.0404	30.9592	30.8944	32.4295	32.9568
	21.1752	25.3637	23.8277	24.6442	22.893	22.8183	23.4822	21.3357	18.6234	16.2616	15.4523	16.5731	15.3734	16.8831	15.9946	16.8453	18.9739	19.0584	16.8934	17.9781	19.3237	19.0026	18.8187	19.3836	24.2533	28.9171	28.9949	31.5274	32.1282	34.2601	34.5989	36.3562	36.4928	38.3056	39.2609	41.2121	45.3435	45.3839	46.5681	47.1701	48.9196	50.4299	52.1917	55.9547	55.9748	54.3891	55.4253	55.8348	56.555
	28.1796	31.4987	30.2506	30.3674	29.4555	29.9373	31.0115	27.6207	24.7262	23.4085	21.809	23.27	21.1352	23.0847	22.2767	22.3004	24.1043	24.6633	23.3935	23.1984	24.6125	25.3937	24.5766	25.5712	34.058	38.8455	39.7059	42.317	45.1087	47.2127	48.2895	52.4448	52.5869	56.659	58.854	61.6169	67.1594	68.6661	73.2057	73.9201	78.0339	81.1399	84.0879	89.151	90.0103	90.1777	91.9502	94.2065	95.6354
	19.9592	23.209	21.7895	21.8308	21.4611	19.7126	21.3857	18.8364	16.1979	14.487	13.3833	14.7466	12.8195	14.3568	14.047	14.0347	16.1833	16.3028	15.4154	15.2748	17.3525	17.5636	16.1802	17.0282	22.9376	27.7507	28.4875	30.1474	31.3673	33.0977	35.0578	37.2472	37.6934	40.5284	41.9378	44.0363	49.3051	50.4596	52.5937	54.7693	57.5726	59.9963	62.2291	67.0941	68.1445	68.2549	69.3298	70.7213	72.3289
	13.6302	17.6458	16.6536	17.0789	16.0469	15.7723	16.9649	14.3961	12.0238	10.2849	9.65666	11.1655	9.66102	10.9333	11.033	10.8254	12.6601	13.0621	11.1025	10.3827	12.1079	11.949	10.7497	10.504	11.1841	15.4999	15.0155	16.5499	16.4231	18.7491	18.6069	20.2721	19.8227	21.7015	22.4977	24.3377	27.5997	27.9045	30.1085	29.9784	32.7594	33.7183	36.3386	41.463	42.1627	41.8072	43.7555	44.9219	46.9572
	10.7833	14.66	14.0458	14.0109	13.2069	12.8893	14.1519	12.3524	9.55466	8.02133	7.10448	8.67748	6.98332	8.54992	8.49906	9.15878	10.3761	10.0531	8.31573	8.03447	9.52224	9.23973	7.58512	7.86488	6.04087	10.3133	9.61467	10.7194	10.8462	12.1431	11.9135	12.356	11.9796	12.6946	13.3222	14.2922	17.1552	16.8501	18.3946	17.7708	19.7491	20.4136	21.5792	25.535	25.513	24.4314	25.7624	26.5344	27.3696
	5.11335	8.77709	8.19961	7.52115	7.06736	6.50661	7.88967	5.3223	3.4013	2.06719	0.686413	1.66701	0.852432	2.54567	1.57228	2.164	3.31576	4.36574	1.95741	2.55795	3.77238	3.81586	3.15002	2.32058	5.21761	10.5128	10.0536	10.8096	12.5612	13.7206	13.8315	16.2795	15.4346	17.9834	17.3539	18.8481	22.0925	21.7632	24.1575	24.2158	26.9099	27.2945	29.056	32.7973	34.3824	32.8808	33.3124	33.4648	34.9694
	18.1908	22.0006	20.7902	20.4842	19.6677	19.4531	20.2642	18.1488	15.7166	13.9276	12.5587	13.9508	12.3397	13.2484	13.4088	13.9712	15.6932	15.6524	14.1972	14.0493	15.6444	15.5907	14.7183	15.5154	18.6701	23.4217	23.1033	25.1465	25.2446	27.0189	27.6427	28.8162	28.811	30.2167	30.5964	32.7564	35.7891	35.9706	37.6761	36.8084	39.2718	40.9513	41.7533	45.6042	44.9904	44.3364	44.5981	45.6156	46.4018
	15.8177	18.7612	18.4828	18.2719	17.3262	16.7639	18.1178	16.0242	13.0569	11.2952	10.4215	11.6438	9.49441	11.6341	11.5334	12.3616	13.8154	13.3937	12.2118	11.845	13.3991	13.4228	12.3254	12.4107	15.2045	19.8543	19.4274	20.8651	21.3001	23.3557	23.2411	24.9922	24.4529	26.0454	26.7004	27.8029	30.5165	30.567	32.8044	32.419	34.4289	35.0814	36.371	40.3298	40.3695	38.8558	39.9567	39.7476	41.6212
	14.5016	18.7809	17.1618	17.0752	15.9634	16.0115	17.0991	14.9618	12.1912	10.6542	9.77779	11.0359	8.78192	10.2083	9.83963	10.2963	12.4972	12.6731	10.9543	10.5604	12.1682	12.7771	11.604	12.0105	15.668	19.2271	19.9125	21.103	21.4147	23.0538	23.0845	24.4899	24.0552	25.6359	26.113	26.737	30.1833	29.6636	31.4247	31.1038	33.2822	33.49	34.6372	37.7107	37.3393	36.1694	36.1955	37.0193	37.7102
	13.4147	17.5214	16.1169	16.2651	15.8478	14.8483	16.7759	14.3904	11.7042	10.2863	9.57863	10.7558	8.90315	10.546	10.8114	11.3833	12.6602	12.7357	11.5415	11.0006	13.0015	12.4953	11.2227	11.5541	13.1692	18.2654	17.3358	19.0092	19.4137	20.8004	21.8735	23.0024	23.1062	24.9518	25.5457	27.73	31.1322	32.2132	34.4517	34.3012	37.9341	39.1253	40.7934	45.8516	45.5934	45.6111	46.9515	47.5321	49.0765
	16.3026	19.9833	19.0647	18.6534	17.9435	17.217	18.5806	15.9539	14.0609	12.0481	10.8798	12.6338	10.5651	12.4046	12.3006	12.313	14.4969	13.9164	12.632	12.2793	13.9318	14.175	13.1306	13.3744	15.3622	19.7228	19.5316	21.6894	21.51	23.1976	23.0671	24.1881	24.2958	25.0773	25.5406	26.5524	29.4822	29.3404	31.0389	30.0416	32.1923	33.162	33.7017	37.5082	36.8411	34.8462	35.6365	35.2778	36.5505
	12.3045	15.4967	15.3732	14.8218	14.4784	13.3515	14.2521	12.1451	9.80314	8.28171	7.42164	8.28857	6.61617	8.29602	8.07092	8.73732	10.559	9.51599	8.76365	8.13914	10.3466	10.649	9.2314	10.0656	12.4454	16.8664	16.8029	18.7111	18.657	20.4642	20.2342	20.7531	20.5267	22.4322	22.2104	23.6121	26.4228	26.3196	27.0735	27.4787	29.7589	29.7628	30.3971	33.6657	33.8668	31.5696	32.3708	32.3405	33.691
	15.0447	19.1851	18.159	17.9672	17.635	17.2562	18.1064	16.0509	13.417	11.0753	10.3327	12.1399	9.38383	11.1805	11.7443	11.5557	13.9686	13.4015	13.1128	11.6051	13.1992	14.0102	12.4182	13.0413	14.9404	19.5902	18.5348	21.3932	21.7446	22.5957	23.219	23.5593	22.9938	25.3968	26.4205	27.7986	30.0233	29.7969	30.8984	31.0935	33.5785	34.1734	35.4184	38.4392	38.6278	37.3444	37.075	39.3204	38.7518
	12.1185	15.9301	16.3302	14.8698	15.1158	14.2383	15.427	12.3513	10.5887	9.99916	8.74113	9.1023	8.13027	9.05384	9.24544	9.13002	11.6684	10.9955	10.1409	9.22874	11.1861	11.0226	9.50834	10.2953	12.6862	17.0804	16.9564	17.9511	18.236	19.9231	20.182	20.3392	20.9074	21.6207	22.0968	23.611	26.5714	26.5002	26.8244	25.8108	28.7626	29.4443	30.1689	34.0414	33.5825	32.1656	31.5833	33.4996	34.097
	34.214	38.5515	37.0563	37.3214	36.1316	35.2177	37.1011	34.4309	31.7011	29.6112	29.2226	29.8925	28.1424	29.5243	29.7931	29.9406	31.2481	31.5621	30.3358	29.892	32.3432	32.1998	30.6753	31.3811	35.0182	40.4415	39.6371	42.2211	43.1742	45.1691	45.2303	47.8361	48.469	50.5045	51.2328	52.9554	57.0657	58.2755	60.5255	60.4119	63.809	65.2295	67.4729	71.4894	71.5519	70.1598	70.7013	71.8828	71.9886
	29.4875	34.1892	32.1626	31.9208	30.6771	31.1865	32.2797	28.5733	25.9643	24.6422	23.4269	24.8363	22.412	23.9877	25.3552	25.3101	26.9742	26.5371	25.1766	25.5248	26.9666	26.9967	26.3681	26.4257	33.6982	38.9572	38.9914	40.9689	42.4895	44.0783	45.8322	47.3114	48.5185	49.2997	50.7246	53.3668	57.09	57.5396	59.286	59.5024	62.0868	63.6376	65.0549	68.1251	68.5008	66.7892	67.5327	67.2351	68.7178
	20.6248	24.509	23.2173	23.3255	22.0769	21.794	23.1123	19.7127	17.3774	15.3428	14.8199	15.8553	13.8093	15.6004	15.8011	15.4186	16.9811	17.641	16.0025	15.7018	18.2745	17.7537	17.16	18.396	22.0981	27.0674	27.4431	29.5529	30.8062	32.6053	32.2602	34.8983	34.7773	36.1965	37.4917	38.6851	41.8071	42.8114	44.753	44.5653	47.4111	48.8173	49.6111	53.047	53.767	52.4443	53.4903	53.7468	53.9946
	14.4024	18.0959	17.0829	17.0132	16.3113	16.0225	17.2914	15.0605	12.5547	11.3517	10.3069	11.6156	10.1153	11.7841	11.1337	11.6867	13.2649	13.113	12.0123	11.3536	12.3828	12.7108	11.5757	12.1051	13.1639	17.623	16.849	18.2044	18.7316	20.0132	19.9149	21.0161	20.7667	21.7235	22.4689	23.1135	26.1958	25.7973	27.0012	26.4007	27.9803	28.5762	30.107	32.9719	32.4873	31.1313	32.195	31.5546	32.7043
	22.646	26.7297	25.3777	25.2815	24.2132	23.859	24.5831	21.7897	18.7193	18.1306	16.8565	17.9328	16.5566	17.184	18.0396	18.0441	19.051	19.7626	18.6292	18.6695	20.4939	20.5778	20.0761	19.8465	26.042	30.4453	30.1421	33.0674	34.07	35.5074	35.0648	37.4265	37.4502	38.8841	40.1854	41.3486	44.7508	45.2257	46.6218	46.4389	49.6889	50.6348	51.0814	55.2807	54.2211	54.1317	53.708	54.4972	54.485
	44.0499	48.0834	46.5155	46.3159	44.3085	43.9859	46.0069	41.5159	39.4171	37.6256	36.8374	37.7448	34.9543	37.0522	37.0679	36.9685	38.0085	37.9345	36.9807	36.6123	40.1378	39.3827	39.2078	39.7565	47.7787	53.2135	53.579	57.0474	58.681	60.9429	62.9111	67.0696	65.8089	69.6578	70.4267	73.4869	78.1995	79.1805	84.3702	82.5607	88.1854	89.6867	91.3351	97.1239	96.2197	97.5208	98.5163	100.583	100.496
	18.6656	22.629	20.7309	21.0492	19.9122	19.4534	20.9145	17.9874	15.5643	13.5062	12.717	13.7569	12.2063	13.5329	13.1644	13.6171	15.5428	15.3419	14.352	14.0113	16.104	16.4883	15.0775	16.3619	19.7958	25.2093	24.9743	26.7818	27.7363	29.5462	29.6186	30.5564	30.9524	32.2853	32.8541	34.103	37.7753	37.9138	39.0479	39.545	41.1662	42.6024	43.9214	47.0576	46.4622	44.9982	46.1316	45.987	46.8813
IP3R1 shRNA+IP3R1 1-604	15.7597	15.2353	15.2463	14.6796	15.0816	15.2336	15.661	15.8034	15.0104	15.6134	15.77	16.1824	15.9125	16.1106	15.9263	16.4895	16.1331	15.3346	15.2354	15.9399	16.1111	15.4037	15.5477	15.5305	11.0106	11.2716	12.1643	12.5009	12.544	13.0741	14.2192	15.1025	16.2764	16.8791	17.982	18.9399	19.0339	19.3569	20.3077	21.0159	22.3612	22.5954	23.7914	24.6992	25.2044	25.9216	26.7234	27.7439	28.1818
	18.0484	17.6476	17.2826	16.7557	17.6081	17.4409	17.9299	17.871	17.171	17.7653	17.7874	17.928	18.1834	18.2249	17.8855	18.0147	17.8809	17.3352	16.9987	17.657	17.8456	17.2933	17.1661	17.5441	20.2218	20.2491	20.7226	21.4274	22.0823	23.5233	25.3612	26.7084	28.7326	30.3786	32.5395	33.9174	34.9717	36.4039	37.9142	39.7462	41.5568	42.1928	43.9165	45.3264	46.6964	47.7487	49.1305	50.751	50.9321
	13.4545	13.0166	12.7741	12.4184	12.9214	13.2173	13.3897	13.4363	12.715	13.7563	13.6379	13.6461	13.6175	13.6088	13.4235	13.6426	13.5251	12.8854	12.8752	13.6463	13.7006	13.3213	13.02	12.9528	28.5727	25.4271	25.0341	24.6805	24.2299	24.7747	26.5659	27.0548	28.6903	29.5271	30.8836	31.1685	31.0636	32.1449	33.0853	34.1307	34.908	36.2547	36.6546	37.8512	38.5536	39.2326	39.8406	40.9198	41.5623
	30.2623	30.128	29.1829	28.747	29.3436	29.0802	29.552	29.8759	28.7271	29.936	29.6597	30.1754	29.8557	29.5799	29.6877	29.6395	29.5512	28.5486	28.3044	29.2732	29.4154	28.5013	28.9042	29.0714	29.0419	28.4938	28.2772	28.4986	28.4071	28.5981	30.2259	30.4711	31.6585	32.659	33.5006	34.0572	33.9824	33.5863	34.3098	35.5703	36.2395	36.4115	37.0588	37.9401	38.1555	38.88	39.3516	40.766	40.912
	22.9479	23.5672	22.733	22.5188	22.9651	22.9114	23.2794	23.6198	22.8972	23.8055	23.7021	23.8577	24.1929	24.0293	23.4622	24.284	23.8873	23.0279	23.0684	23.8612	23.7132	23.5005	23.0173	22.9766	23.2729	22.9911	23.3632	24.1825	23.6557	24.4569	25.9305	26.8085	28.134	29.506	30.7117	31.651	31.8911	32.517	33.3554	34.9376	36.3819	36.0031	38.3488	39.4379	40.8085	41.0357	41.8402	43.42	44.1004
	32.4462	32.0566	31.8234	31.3826	31.9812	31.6699	32.6305	32.1565	31.9056	32.2091	32.5703	32.7305	32.9551	32.8098	32.9624	32.9273	32.9857	32.0075	31.6222	32.5587	33.2104	32.004	32.3882	32.1995	33.8703	33.682	33.6849	33.6911	33.2168	33.7918	34.8826	35.5392	37.1041	38.0784	38.5547	39.676	39.9943	40.2688	40.6383	42.2195	43.3271	43.4042	44.9852	46.0588	47.0747	47.2824	48.9931	49.6617	50.0142
	23.9392	23.8613	23.0392	22.8827	23.5549	23.2969	23.3269	23.5753	22.7478	23.2791	23.3477	23.8785	24.1834	23.7816	23.2202	23.7368	23.5178	22.3251	22.6063	23.5176	23.2108	22.483	22.8811	22.6696	23.0295	22.8941	23.4264	23.9945	24.2316	24.8282	26.4246	27.4467	29.1482	30.4845	31.2115	32.6868	33.4803	34.0074	35.548	36.4968	38.2236	38.9153	40.7545	42.1626	42.8724	44.5814	45.7981	47.1725	47.9924
	27.6642	27.3112	26.8665	26.4772	27.0946	27.1323	27.7578	27.7976	26.9151	27.5183	27.9881	27.97	28.0747	28.2273	27.9489	28.1791	28.0969	27.1717	26.6464	27.7692	27.6986	27.3435	26.9041	27.073	28.014	27.7812	27.6238	27.6859	27.5016	27.6136	28.8196	29.1498	30.3957	30.7516	31.3857	32.2096	32.2347	32.2478	33.3478	34.0108	35.0727	35.1891	36.227	36.9341	37.8866	38.2068	39.5472	40.3474	40.9838
	22.4127	22.3331	21.7847	21.6835	22.1014	22.0475	22.5082	22.2272	21.9354	22.5108	23.1144	22.9237	23.3009	23.134	22.9963	23.2171	23.2752	22.2048	22.1114	23.0827	23.4286	22.5353	22.7577	22.9368	24.3497	24.1235	23.8544	23.9542	23.5453	23.7961	25.0862	25.5192	26.638	27.1474	27.819	28.162	28.1254	28.2178	29.1974	29.996	30.8659	30.7358	31.9628	32.7944	33.2187	33.6736	34.6307	35.6587	36.005
	16.3646	16.3783	16.2094	16.0994	16.1836	16.216	16.7499	16.8706	16.03	16.3711	16.6735	17.0106	17.1096	16.8331	16.7754	17.218	16.8035	16.1475	15.7011	16.7004	17.0259	16.1977	15.9741	16.2885	17.5381	17.2309	17.1071	17.5068	16.8849	17.0479	18.0023	18.4972	19.7734	19.9667	20.8164	21.542	21.6378	21.8901	22.3189	23.0244	23.9854	24.4548	25.5528	26.122	26.886	27.2944	28.3139	28.9763	29.7622
	21.5731	21.3451	21.0331	20.5491	21.0712	21.185	21.3367	21.719	20.4934	21.3362	21.6683	21.6538	22.141	21.7828	21.957	21.7267	21.9402	20.5609	20.6733	21.6091	21.5794	21.027	21.0159	21.4547	22.142	21.9062	21.8558	22.0292	21.4553	21.7669	22.8028	23.1408	24.842	24.8184	25.3257	26.0679	26.0198	25.9886	26.4526	27.2671	27.8408	28.0108	28.8973	29.77	30.1413	30.4674	31.3236	32.3408	32.3834
	30.4279	29.9668	29.7455	29.301	29.8652	29.7465	30.3704	30.3913	29.142	30.1637	30.3554	30.2419	30.5719	30.2753	30.094	30.4908	30.2777	29.6347	29.232	30.2877	30.536	29.7305	29.4682	29.792	30.6913	30.5108	30.4219	30.5434	30.3632	30.4895	32.1561	32.3998	34.2989	35.0123	35.5923	36.275	36.4027	36.8011	37.7892	38.5579	39.6035	39.8417	40.8716	41.9245	42.6544	43.3413	44.2366	44.8911	45.3446
	15.5271	15.0289	14.8371	14.5681	15.0404	14.8643	15.5921	15.4112	14.4439	15.1694	15.3014	15.6994	15.5635	15.5304	15.5353	15.5256	15.3523	14.4851	14.5208	15.2215	15.3128	14.601	14.5712	14.5098	15.6186	15.4743	15.2807	15.3042	14.9091	15.2556	16.017	16.7445	17.8051	18.178	18.7519	19.3696	19.2947	19.3695	20.2373	20.676	21.4841	21.6364	22.4869	23.0786	23.441	23.779	24.881	25.4298	26.0674
	25.7004	25.7149	25.1144	24.6646	25.5276	24.9977	25.603	25.447	24.7347	25.521	26.0376	26.2523	26.2724	26.0639	26.0384	26.4098	26.2537	25.0532	24.7789	26.0152	26.3627	25.3989	25.5803	25.4428	26.6922	25.8117	25.8134	26.2937	25.6679	26.0299	27.1184	27.5273	28.9122	29.6321	30.3692	30.4126	30.7468	31.3377	31.8571	32.5633	33.5263	33.7134	34.7557	35.6311	35.9124	36.3422	36.9053	38.4472	38.3095
	19.8475	19.246	18.7554	18.388	18.5781	18.8397	19.4072	19.2128	18.5273	19.2762	19.5971	19.5765	19.7336	19.4648	19.1141	19.2242	19.3686	18.3634	18.643	18.9951	19.4929	18.6871	18.5901	18.7148	19.1453	18.6371	18.6768	18.8977	18.2884	19.1003	19.7004	20.0627	21.913	21.9116	22.8918	23.0283	23.1096	23.6467	24.205	25.0637	25.8252	26.0293	27.4647	27.9787	28.1671	29.0621	30.1046	30.8614	31.2257
	25.3974	24.5944	24.3394	24.0242	24.6384	24.1997	24.5993	24.4884	23.4232	24.1357	24.3082	24.6085	24.4984	24.1188	24.0237	24.1253	24.1231	22.9766	22.7212	23.3276	23.4537	22.7517	22.8392	22.8156	22.6891	22.2692	21.9524	21.9576	21.6567	22.1282	22.8179	23.2222	24.4897	24.7096	25.3048	25.7351	25.7643	25.4159	26.421	27.1363	27.5442	27.9348	28.5613	29.1486	29.7194	30.0243	30.5344	31.4587	31.8586
	21.6288	20.7602	20.6803	20.1947	20.8116	20.6024	21.2291	20.9637	20.5317	21.1123	21.4116	21.4653	21.5131	21.3787	21.3694	21.5675	21.4659	20.596	20.4203	21.3385	21.2777	20.692	20.6615	21.1937	20.9611	20.8587	21.0168	20.9665	20.8317	21.0301	22.3775	22.6723	23.8616	24.887	25.8619	26.31	26.4756	26.6337	27.4161	28.3634	29.0715	29.0481	30.6187	30.9099	31.5564	32.4129	32.4011	33.441	34.2351
	13.7615	13.4459	13.2813	12.5968	13.4512	13.3324	13.5471	13.6532	13.1929	13.3237	13.984	14.3154	13.7845	14.1234	13.8695	13.9636	13.4291	13.2703	12.8737	13.8266	13.8752	13.8169	12.9178	13.3889	13.8492	13.3132	13.5025	13.4186	13.5966	13.8021	14.8835	15.2158	16.6076	17.5911	17.9909	18.8693	18.9153	18.7288	19.5016	20.2645	21.2894	21.3779	22.3307	22.9864	23.5843	24.0629	24.6832	25.1185	25.6966
	21.1392	20.9214	20.2302	20.0679	20.2803	20.0164	20.4549	20.274	19.8437	20.4258	20.9255	20.5934	20.6831	20.3581	20.43	20.5221	20.6121	20.1051	19.3066	20.2353	20.3655	19.4274	19.6485	19.9959	20.4782	20.0659	19.8954	20.4035	19.8494	20.2245	21.5908	21.987	22.9512	23.6474	24.3501	24.9786	25.1058	24.7803	25.4704	26.3161	27.4006	26.9037	27.9843	28.7524	28.9828	29.2904	29.8708	30.9232	30.6266
	40.7031	40.0986	39.7457	39.1888	39.7313	39.4962	40.0765	39.6599	38.8609	40.2024	40.1982	40.3354	40.3682	39.8137	39.8945	40.1558	39.9776	38.9778	38.4465	39.8073	39.7607	39.0441	38.9657	38.8375	39.2001	39.1347	38.7415	39.6105	39.6889	40.4335	41.4951	42.1416	44.1923	44.6259	45.6804	45.9224	45.9845	46.4732	46.8277	47.6537	48.8281	48.583	50.238	50.182	51.4195	51.6611	52.7301	52.9372	53.2371
	22.4194	21.8158	21.6149	21.4087	21.5623	21.3926	21.9843	22.0322	21.365	21.9449	22.1086	22.1514	22.2111	21.7709	22.0024	22.1923	22.02	21.1156	20.8248	21.467	21.8494	21.3888	21.1893	21.3962	21.7923	21.6227	21.3616	21.109	20.8768	20.9549	21.7273	21.9778	23.3594	23.4399	23.9233	24.1265	24.0328	23.9792	24.2385	24.8804	25.6639	25.911	26.666	27.4977	27.5374	28.3049	29.0853	29.8018	30.1361
	28.7033	28.7026	28.0651	27.2432	27.973	28.1092	28.1684	28.5672	27.5505	28.2004	28.5583	28.7329	28.9501	28.5918	28.7288	28.8972	28.7388	28.0744	27.8527	28.8626	28.4854	28.1886	27.847	28.3247	29.0575	28.3797	28.3006	28.1285	27.7819	28.0178	28.5723	28.837	30.3326	30.6174	31.3673	31.6218	31.4262	31.6942	31.7611	32.5861	33.3133	33.1338	34.5005	34.765	35.1569	35.5429	36.0461	36.8965	37.3219
	27.0461	27.0924	27.0656	26.4269	27.1232	27.4003	27.2993	27.4016	26.587	26.9582	27.58	27.6573	27.738	27.5288	27.8793	27.9878	28.0025	27.0576	26.762	27.63	27.8688	27.3762	27.3242	27.498	28.3749	27.8455	27.7991	27.6254	27.1485	27.3583	28.0878	28.2004	29.5301	30.1943	30.3123	31.1588	31.1658	30.9592	31.2157	32.4002	33.0119	33.0098	33.8088	34.6306	35.0007	35.2527	36.0535	36.8875	37.3422
	18.8943	18.4003	18.2771	17.6681	18.3003	18.1722	18.7678	18.4248	18.1317	18.6248	18.8121	18.9725	19.0162	18.8066	18.6313	18.8372	18.9554	18.0417	17.7531	18.4911	18.8942	18.231	18.1829	18.4215	18.951	18.9452	18.8913	18.7133	18.4668	18.1686	19.3638	19.7705	20.6727	21.0746	21.4346	22.1878	21.8554	21.9135	22.3935	22.9131	23.6824	23.5868	24.4954	25.2639	25.2566	25.6448	26.4761	27.3971	27.0402
	21.2735	20.8291	20.804	19.8939	20.136	20.1425	20.9992	20.6554	19.7913	20.4385	20.5711	20.9471	20.8212	20.2663	20.3727	20.2441	20.8344	19.5089	19.2613	19.999	20.2946	19.7478	19.2924	19.6107	20.3257	19.7446	19.635	19.6065	19.2964	19.3057	20.0258	20.5942	21.6539	22.2276	22.37	22.8199	23.1431	22.8796	23.3538	24.1485	25.1032	25.3117	25.9909	26.7805	26.7763	27.422	28.0807	29.2585	29.1183
	34.7523	34.7684	34.2971	33.9595	34.5374	34.3603	35.0194	35.0629	34.3945	34.745	35.6604	35.6788	35.6331	35.3717	35.1452	35.9253	35.7451	34.8239	34.7283	35.3607	35.9539	34.9662	34.8426	35.0414	36.4343	35.5571	35.6189	35.4649	35.2373	34.6414	36.1477	35.9438	37.4246	38.0297	37.8966	39.0126	38.2249	38.3559	38.6712	39.6685	40.378	40.1258	40.9096	41.4724	41.8469	42.3872	42.709	44.0958	43.9032
	24.2055	23.7038	23.2138	22.8019	23.3846	23.3665	23.8678	23.898	23.0018	23.4831	24.189	24.4836	23.9246	24.1117	24.1372	24.3834	24.4347	23.5414	23.0663	23.9181	24.3301	23.8474	23.7612	23.6968	24.4953	24.2072	24.1032	23.9217	23.2591	23.2489	24.5175	24.905	25.5273	25.9554	26.8275	27.2605	26.9585	26.4388	26.8994	27.9966	28.2277	28.8112	29.3984	29.9546	29.9929	30.4924	31.0767	31.8864	31.4095
	33.6599	32.8983	33.1793	32.3422	33.0878	32.9053	33.4908	33.3085	32.7794	33.0644	33.3809	33.6445	33.873	32.993	33.3737	33.9727	33.4203	32.3587	31.8292	32.9974	33.5063	32.8534	32.5678	32.6966	33.6377	33.1809	32.9071	32.8355	32.0186	32.2475	32.7212	32.8881	34.4259	34.6849	34.7267	35.7307	35.1118	35.1493	35.0378	36.0969	36.9097	36.5979	37.3241	37.7488	38.4015	38.4607	38.8547	39.2766	39.7139
	21.1291	20.9635	20.5012	20.324	20.8084	20.53	21.4227	21.2102	20.3122	20.8345	21.2982	21.2851	21.5584	21.3031	21.4365	21.4403	21.3017	20.3417	20.2279	20.8496	20.8874	20.7708	20.4658	20.7887	21.5344	21.4268	21.0729	21.1486	20.987	20.9767	22.2708	22.4211	23.6585	24.2802	25.0221	25.5981	25.7512	25.6547	26.6091	27.3322	28.1146	28.494	29.5877	30.5509	30.9283	31.4661	32.4384	33.2778	33.7554
	38.2004	38.6632	38.9075	38.7861	38.1963	39.7654	39.2783	39.1355	39.0944	39.8206	39.871	39.9719	40.7009	40.835	41.0154	41.6504	41.7512	41.6147	41.5264	41.9263	42.3888	43.066	43.2038	42.9282	42.3678	40.7289	41.4054	42.0393	42.9242	41.4789	41.8953	42.2738	43.0701	44.0096	45.6638	44.3469	44.0248	43.7849	44.1839	44.9748	43.9638	44.9461	44.2254	44.9151	44.1743	44.368	44.5172	45.1531	45.2482
	15.2702	15.6817	16.2721	15.8437	15.1058	16.9887	16.3277	16.219	16.1735	16.67	16.2106	17.1649	17.1638	17.4541	17.7161	18.1059	18.0945	18.2159	18.443	18.8389	18.8427	19.2603	19.4179	19.7541	19.3564	18.1364	18.4964	18.9485	19.4763	18.6441	19.172	19.5895	19.8667	20.9585	22.2569	21.1162	20.704	21.0209	21.3687	21.9775	20.7822	21.9595	21.8652	22.1073	21.5753	22.2926	22.0967	22.8621	23.2639
	19.5285	19.9707	20.108	19.9767	19.4533	20.542	20.3619	20.2555	20.3296	20.8442	20.6129	20.642	21.3459	21.5993	22.356	22.4857	22.5643	22.3948	22.6019	22.6144	22.9977	23.3382	23.9293	23.4024	23.6689	22.1445	23.1222	23.3673	24.1988	23.1153	23.4095	23.832	24.1481	25.5372	26.7164	26.0056	25.2123	25.2017	25.7682	26.3957	25.7773	26.1621	25.8872	25.9824	26.0485	26.3213	26.1434	26.372	26.8468
	21.8949	22.4613	23.0463	22.4711	22.2007	23.3316	23.2281	23.2588	23.5399	23.4243	23.5576	23.7952	24.1517	23.9789	25.1125	25.6439	25.49	25.2	25.7507	25.9017	25.7768	26.4687	26.6813	26.3078	27.4903	25.8966	26.3819	26.5736	27.1213	26.4927	26.9064	26.7442	27.7882	27.7943	30.0825	28.9582	28.8183	28.1919	28.2465	29.7932	28.4337	29.3324	29.0401	29.2908	28.7724	29.0203	29.0309	29.5788	29.9715
	37.21	37.7622	38.23	38.1656	37.5108	39.2877	38.9132	39.2908	39.0381	39.7522	39.6722	39.945	40.7336	40.8268	41.1858	42.212	42.1491	42.0522	41.9642	42.3526	42.8947	42.9416	43.7382	43.7254	43.8199	42.0614	42.7766	43.2755	44.1649	43.3204	43.6057	43.7279	44.6147	45.5586	47.2775	46.3401	46.0345	45.7315	45.9702	46.8902	45.6486	46.6672	46.0281	47.1958	46.4997	46.5525	46.6199	47.1303	47.6339
	40.8004	41.1351	41.8085	41.5663	40.4449	42.0533	41.7967	41.6007	41.8551	42.3093	42.0015	41.9905	42.762	42.8858	43.2033	43.6653	43.7416	43.5501	43.5829	43.7337	43.4982	44.4809	44.7247	44.2355	44.0743	42.0924	42.7596	43.0383	44.1187	42.5649	42.982	43.252	44.1298	44.705	46.5359	45.2541	44.8755	44.3384	44.5959	45.7579	44.2411	45.4643	44.7962	44.9583	44.7806	44.5977	44.5389	45.3669	44.892
	20.6459	21.0849	21.4982	21.6748	20.7493	22.1496	21.9048	21.9398	22.158	22.5392	22.3932	22.9239	23.3999	23.4804	24.092	24.1363	24.4442	24.222	24.6324	25.273	24.9613	25.7562	25.8239	25.6747	25.6358	23.7428	24.9017	25.2308	26.0089	25.2141	25.4262	25.7031	26.423	27.2151	28.7645	27.3721	27.1471	27.202	27.5766	28.5348	27.3126	28.292	27.9162	28.4919	28.0237	27.8286	27.8661	28.4937	28.2871
	36.077	36.652	37.1154	36.7984	36.4822	37.8993	37.6415	37.5522	37.9289	38.3539	38.385	38.5918	39.2379	39.286	39.7565	40.5098	40.6021	40.3342	40.4167	40.9084	40.8807	41.5195	41.703	41.396	41.7086	39.6762	40.5119	41.1734	41.9832	40.94	41.1576	41.2288	42.7305	43.6106	45.0904	43.9892	43.4257	42.7923	43.6306	44.645	43.096	44.6205	43.7622	44.073	43.8955	44.0479	44.0926	44.5827	44.9125
	41.3172	41.6939	42.2823	42.5661	41.7683	43.7451	43.3583	43.4317	43.5185	44.0906	44.4437	43.9726	45.3789	45.4544	46.0588	46.5431	46.7415	46.7327	46.823	47.4177	47.4454	47.9174	48.5782	48.1524	48.9168	47.0404	47.8062	48.4021	49.4833	48.4858	48.5571	48.9878	50.3628	51.1168	52.8207	51.9583	51.8368	51.2886	52.0417	53.1142	52.235	53.1472	52.6497	53.2441	52.6404	52.9798	53.036	53.791	53.7618
	31.7214	32.2639	32.9123	32.451	32.0839	33.2647	33.1096	33.2305	33.2979	33.9986	33.7822	34.0092	34.6363	34.7554	35.1262	35.4672	35.3654	35.2808	35.2408	35.279	35.6191	36.0325	36.4616	35.9413	35.6351	34.1848	35.0205	35.3135	36.2974	35.3227	35.3685	35.6772	36.6722	37.6667	38.8939	37.6382	37.4767	37.5147	37.6456	38.8979	37.1137	37.796	37.7005	38.4255	38.1013	38.1103	38.1155	38.9639	38.7155
	28.2274	28.7353	28.8967	29.1159	28.3282	29.7364	29.2846	28.9784	29.3991	29.9946	29.7811	29.8502	30.3959	30.3687	30.8709	31.1381	31.8602	31.5468	31.579	31.8004	32.0574	32.7061	32.9592	32.7061	32.6183	30.7863	31.4962	32.1469	32.8076	31.9478	32.1705	32.7438	33.1135	34.1352	35.8091	34.8983	34.5244	34.1391	34.4504	35.5603	34.0976	35.4385	34.8268	34.9649	34.867	34.9839	34.8432	35.3041	35.3599
	28.2495	28.5063	28.7495	28.8869	28.2396	29.64	29.3668	29.6681	29.8519	30.3065	29.8513	29.8384	31.0963	30.6909	31.4601	32.0703	31.6358	31.4241	31.7231	31.7857	32.1213	32.1354	33.1122	32.6195	32.6392	31.2531	31.7844	32.3148	32.6043	31.948	32.3255	32.4221	33.3702	34.045	35.7528	34.8061	34.3773	34.4443	34.4994	35.5977	34.1228	35.2893	34.4718	35.2659	35.0266	34.9123	34.7507	35.4853	35.7626
	29.771	30.3341	30.8992	30.5082	29.6628	31.2327	31.0383	31.3719	31.2813	31.5174	31.6375	31.8043	32.705	32.9849	33.2374	33.7459	33.6665	33.7632	33.8641	33.9946	34.5909	34.7876	35.4398	35.1197	35.2624	33.8929	34.2016	34.7095	35.4175	34.8225	34.8919	35.2627	36.1698	36.7239	38.815	37.5654	37.087	37.0073	37.312	38.4159	37.0515	38.1493	37.4652	37.7064	37.8249	37.6348	37.5515	38.2966	38.5289
	44.2347	44.7408	45.1097	45.3569	44.3133	45.7132	45.7994	45.5236	45.4532	45.9916	46.0901	45.8781	46.5669	46.9488	47.38	47.6654	47.9423	47.5967	47.7043	48.049	48.0737	48.8182	48.8158	48.7162	48.316	46.6309	47.6272	48.0292	49.1497	47.564	47.5064	48.3284	48.808	50.1206	51.3518	50.3439	49.7408	49.3971	49.8807	51.2014	49.7107	50.758	49.947	50.3754	50.3703	49.831	49.6935	50.8144	51.0352
	44.2577	44.5447	44.9305	44.9857	44.1067	45.6952	45.5505	45.3765	45.1934	45.7958	45.4879	45.4988	45.9932	46.7139	46.645	47.3526	47.2582	47.439	47.6185	47.512	47.4842	47.905	48.6991	48.1878	47.4617	45.4544	46.4547	47.3077	47.5359	46.3912	46.6031	46.9726	47.2982	48.2305	50.3916	48.9442	48.2998	47.8028	48.3923	49.5832	48.281	49.4311	48.8566	49.089	48.9444	48.8908	48.7523	49.4071	49.648
	31.219	31.7252	32.238	31.9355	31.0979	32.8334	32.2496	32.7112	32.722	33.6404	32.9501	33.0253	33.5665	33.8682	34.5468	34.7969	35.1451	34.9447	34.9536	35.3612	35.2422	35.6831	36.1715	35.4183	35.532	33.7579	34.7023	35.0227	35.6992	34.7814	34.9613	35.8042	36.0598	37.1712	38.1827	37.3949	37.0101	36.8279	37.1657	38.4703	36.7949	37.965	37.4096	37.7896	37.6014	37.5623	37.2067	38.3043	38.2703
	36.1959	36.31	36.7471	36.463	35.976	37.726	37.1403	37.4883	37.1527	37.2973	37.4418	38.0807	38.3755	38.5882	39.1353	39.393	39.4439	39.5028	39.5357	39.7189	39.5562	40.5641	40.6113	40.2256	40.1768	38.6263	39.2074	39.8032	40.0879	39.3875	39.1427	39.9038	40.7822	41.4561	43.5204	42.0339	41.6748	41.4597	41.5483	42.3767	41.439	42.4079	42.1234	42.6877	41.5827	42.4076	42.2732	42.8008	43.2871
	29.5834	30.2811	30.474	30.5853	29.5291	31.0841	30.6803	30.7626	30.8801	31.3019	31.437	31.2541	32.1002	32.4978	32.7002	32.8636	33.2482	32.8487	33.1253	33.306	33.5115	34.3697	34.3666	34.3524	34.2013	32.3038	32.9031	33.7509	34.0485	33.1154	33.3338	33.6923	34.8722	35.3602	37.0873	36.1436	35.1914	35.4246	35.6992	36.5768	35.3244	36.5971	35.8806	36.5102	35.8279	35.862	35.8099	36.4228	36.5048
	35.6644	36.3239	36.6583	36.9413	35.4568	37.0265	36.8698	36.6787	36.6	37.2163	37.3622	37.2911	38.0511	38.284	38.7757	39.1628	39.3154	39.5547	39.1595	39.8489	39.8125	40.7049	40.5617	40.3716	40.3233	38.3506	39.6073	39.4327	40.5817	39.6058	39.6971	39.8239	40.8106	42.0313	43.5538	42.2962	41.8453	42.0795	42.1646	43.2533	41.724	43.104	42.6493	43.0394	42.3299	42.6935	42.5164	42.8303	43.1797
	33.2102	33.8762	34.3115	34.18	33.5357	34.9899	35.105	34.3586	34.7603	35.2506	35.1783	34.9351	35.7892	35.4397	36.3231	36.5113	36.5105	36.8142	36.644	37.0044	37.2357	37.7101	37.8443	37.8679	37.2187	35.6257	36.4033	36.6552	37.6641	36.4229	36.4347	36.8258	38.0853	38.7206	40.1714	39.0835	38.6132	38.4617	38.6272	39.6641	38.3983	39.0926	38.9493	39.4657	38.979	39.2913	38.9109	39.7503	39.8406
	35.3988	35.825	35.9545	35.9048	34.8261	36.3936	36.0455	36.3283	35.9334	36.7812	36.3269	36.4897	37.1749	37.3863	38.0744	38.447	38.3341	37.9766	38.2849	38.821	38.816	39.1367	39.5843	39.6118	39.4519	37.7536	38.7925	39.0399	39.6673	38.6693	38.8732	39.1274	40.138	41.0703	42.6056	41.4757	41.0971	41.1824	41.5938	42.3682	40.972	41.8324	41.5287	42.2432	41.5592	41.5366	41.6607	42.0231	42.0564
	35.0008	35.3681	35.4313	35.0741	34.6317	36.5501	35.8396	35.7356	35.6134	36.1022	35.9268	36.2043	36.8835	36.5918	37.3006	37.4945	37.9283	37.5683	37.9785	38.2743	38.2865	38.4716	39.2842	38.7321	38.5794	36.6104	37.4765	38.0399	38.7032	37.8821	37.5449	38.1851	39.1195	39.9753	41.4704	40.2706	39.7113	40.0601	40.0434	41.0017	39.8884	41.1077	40.1133	40.2679	40.1551	39.9806	40.1162	40.7496	40.8654
	46.7474	47.5809	47.7912	47.6783	46.9515	48.9841	48.2701	48.1567	48.565	49.1465	49.3523	48.9833	50.1968	49.8974	50.6133	51.4839	51.4353	51.443	51.6183	51.9056	51.8042	52.917	52.9741	52.4964	53.4326	50.9145	51.5239	52.7177	53.1036	52.0286	52.5761	52.6473	54.1689	54.8317	56.2991	55.9258	54.8694	54.6784	55.8699	55.9934	54.6137	56.3785	55.8213	56.6099	55.4135	55.8282	55.8094	56.297	56.3631
	46.0516	46.8478	46.6787	47.4648	46.537	48.3983	47.4959	47.7885	47.7616	48.6589	48.646	48.5433	49.8286	49.6128	49.8557	50.1285	50.6258	50.5828	50.1084	51.1868	50.9059	51.3889	51.6534	51.4267	51.5961	50.1862	50.414	50.6046	51.7966	50.2188	50.7593	51.2954	51.8235	52.9304	55.0276	53.7618	52.7124	52.735	53.4788	53.9532	53.0346	53.8634	53.6799	54.0426	53.3366	53.6998	53.8125	54.1139	54.7267
	39.8066	40.161	40.6335	40.5723	39.7584	41.1359	41.1994	41.1698	40.9859	41.3348	41.0057	41.4243	42.623	42.7539	43.0601	43.3557	43.5115	43.6873	43.6821	43.9028	44.2251	44.3382	45.5425	44.4059	44.3763	42.4022	43.0212	43.5528	44.4974	43.5385	44.0273	44.0686	45.0537	46.0212	47.0428	46.4065	46.1035	45.4213	46.3407	47.4964	46.386	47.5463	46.9661	47.3932	47.1064	47.075	46.2983	47.6676	48.3425
	42.4229	43.1349	44.0521	43.2459	42.5746	44.216	43.7588	43.7992	43.8174	44.2581	44.2624	44.5198	45.1725	45.2425	45.7847	46.0607	46.3576	46.0429	46.6369	46.9593	46.316	47.5034	48.2727	47.6312	47.2031	45.1146	45.995	46.547	47.516	46.5997	46.6471	46.8986	48.1398	48.8741	50.3117	48.9167	48.6929	48.565	48.6328	49.6159	48.6515	49.5546	48.8647	49.3651	48.8357	49.3294	49.0726	49.309	49.6495
	29.1126	29.6843	29.9982	29.457	28.8979	30.303	29.9112	30.1914	30.2134	30.5924	30.6131	30.6311	31.0817	31.1364	31.4851	32.0482	31.9232	31.8105	32.0155	32.2033	32.0329	32.3069	33.0698	32.2323	32.115	30.1794	31.1536	31.2323	31.6602	31.3909	30.904	31.3175	31.918	33.0073	34.6752	33.3319	33.165	32.6802	33.0311	34.1626	32.5933	33.7785	33.0595	33.7697	33.2028	33.2691	33.0346	33.6219	33.7947
	28.8473	29.6319	30.1614	29.8023	29.1873	30.434	30.0239	30.1866	30.102	30.4268	30.5375	30.461	31.3231	31.3779	31.9355	32.1221	32.2894	32.2976	32.1327	32.5704	32.6637	33.1731	33.4165	33.1617	33.0885	31.2811	32.1325	32.4516	32.919	32.1209	32.1845	32.7815	33.5183	34.4815	35.7137	34.751	34.3776	33.8644	34.379	35.3392	34.3013	35.2564	34.6403	35.1371	34.9331	35.0192	34.7099	35.2849	35.2698
	32.1482	32.6037	33.067	32.6099	32.0313	33.8349	33.1865	32.8704	33.0691	33.6373	33.4469	33.6796	34.2869	34.6073	34.8913	35.3918	35.2451	34.9659	35.3707	35.9721	35.6038	36.0589	36.5311	36.3821	36.198	34.2347	34.8142	35.4537	36.1675	35.0771	35.5312	35.5181	36.1412	37.3028	38.8335	37.6202	37.2491	37.2174	37.4245	38.6508	36.8979	38.0448	37.4657	38.0291	37.6312	37.8235	37.6292	38.3787	38.2324
	36.5523	37.1769	37.3002	37.6411	36.529	38.2064	37.6974	37.9097	37.5723	38.0793	38.1532	38.3512	39.3952	39.6531	39.7749	40.5027	40.626	40.551	40.3077	40.9782	40.9006	41.6358	41.98	41.956	41.7312	39.9066	40.7629	41.2795	41.4631	40.9792	41.1338	41.4223	41.9756	43.4397	44.7971	43.8861	43.0512	43.2034	43.1958	44.8346	42.9959	43.959	43.5432	44.089	43.8923	43.7709	43.7445	44.2731	44.7213
	29.4955	30.0659	30.134	29.6521	29.4108	30.702	30.5171	30.7321	30.1314	30.6432	31.0745	30.9415	31.7269	31.9622	32.5959	32.9559	32.9877	32.9187	33.1388	33.4807	33.4647	34.1517	33.8574	33.9602	33.7505	31.9585	32.6911	33.0366	34.2033	33.3365	33.0156	33.7001	34.18	35.1167	36.8119	35.7393	34.9852	34.9607	35.8382	36.5053	35.2392	36.3662	36.1087	36.1801	35.5772	36.2295	35.4877	36.4689	36.4881
	42.7198	39.3756	41.6071	41.557	42.7201	41.8761	43.2943	44.0451	42.498	42.7651	43.2151	42.7332	43.9876	44.0378	44.1499	44.6051	45.1548	44.9431	44.729	45.7696	46.2899	47.3202	48.6724	47.8523	48.7569	48.4059	48.5792	49.0996	49.8212	50.0582	50.5551	49.7831	51.0865	51.654	51.7898	51.2558	51.2896	51.4804	51.8734	50.2914	51.8146	51.0995	52.0331	52.5625	52.9064	53.7986	51.8932	53.7464	52.4453
	38.2131	34.6461	36.5741	36.7683	37.8923	37.1219	38.3559	39.2806	37.8954	38.5642	38.6453	37.9754	38.876	39.0685	39.0769	39.5459	40.2195	40.087	39.976	40.6385	41.7657	42.8074	43.7947	42.8319	44.3176	43.8416	43.5226	44.1625	44.6073	44.8634	44.8514	44.6321	45.5581	46.4511	46.33	45.4014	45.2813	46.0418	46.3067	44.8443	46.2085	45.3852	46.868	47.0213	47.4562	48.456	46.2942	48.4655	47.3528
	27.2665	24.2019	25.7718	25.9527	26.9399	26.7081	27.4492	28.603	27.1947	27.8987	27.7159	27.5166	28.3071	28.5606	28.6868	29.3147	29.804	30.0533	29.7033	30.5132	31.639	32.3	33.7634	32.4859	33.6324	33.1649	32.913	33.8702	33.9681	34.4571	34.3956	34.1363	34.8626	36.1842	36.1964	35.7539	36.0699	36.1535	36.587	35.1232	36.5265	35.7569	36.6136	37.2626	37.5401	37.884	36.234	38.0033	36.8936
	28.4222	25.6399	27.7588	26.8817	28.4726	27.6749	28.8384	30.026	28.3215	28.7224	28.7825	28.3866	29.1234	29.3747	29.4849	30.1493	30.5979	30.5927	30.2605	31.5432	32.583	32.9478	34.3069	33.8709	34.5823	34.0707	34.2629	35.0324	35.4574	35.9048	35.9638	35.7296	36.7449	36.9869	37.3677	36.5536	36.8834	36.9351	37.4556	35.762	37.5419	36.5821	37.7281	38.3641	38.2779	39.0765	37.7114	38.8693	38.0299
	30.8324	27.9084	29.8546	30.2337	31.3097	30.9519	31.6661	32.4461	31.1551	31.6606	31.9667	31.5178	32.2383	32.2808	32.0498	32.8391	33.1788	33.0576	33.3369	34.3312	34.8188	35.9748	36.8831	36.5176	37.4297	36.8804	36.889	37.6747	38.3591	38.7407	38.3824	38.3587	39.7065	39.8696	39.8399	39.4807	39.495	39.6322	40.1295	38.5406	40.0052	39.6069	40.3548	41.2644	41.8569	41.9143	40.1123	41.9286	40.4738
	92.7321	88.1261	90.7214	90.4719	91.7845	91.026	92.5818	95.4866	92.7142	93.7474	94.5117	93.9642	95.9053	96.229	96.99	98.2347	99.019	98.8283	98.6429	100.071	100.799	101.729	103.714	101.591	104.447	104.375	104.044	106.025	106.341	106.902	107.183	107.341	108.779	109.868	109.947	109.374	109.195	110.282	110.457	107.87	110.649	109.805	111.875	112.76	113.186	114.085	112.109	114.468	113.405
	45.5092	41.1582	42.764	43.1469	44.2663	43.6374	44.6637	45.6945	44.1455	44.3311	44.9834	44.8125	45.5495	46.253	45.9295	46.2952	46.9512	46.6456	46.5914	47.1934	48.2405	48.8867	50.4148	48.9215	49.919	49.6826	49.7393	51.1171	51.5438	51.7056	52.0575	51.2805	52.6257	53.4885	53.3853	52.5971	52.9943	53.5761	54.404	52.6552	54.4727	54.0077	55.6766	56.3085	56.597	57.669	55.1759	57.7202	56.784
	40.008	36.1756	38.3606	38.49	39.4527	39.4847	40.2572	40.9718	39.7699	39.821	39.6721	39.464	40.6771	40.3714	40.5632	41.2475	41.4917	41.5752	41.0807	41.6804	42.6262	43.5341	45.2695	43.8622	45.3341	44.6035	44.6549	45.4334	46.1596	45.824	46.3785	45.9322	47.1156	47.6284	47.928	47.3546	47.2117	47.5258	48.1833	47.2086	48.371	47.857	49.4051	50.1042	50.8212	51.9949	49.8183	52.1217	51.4467
	41.2862	37.408	39.4358	39.3676	40.5213	40.3682	41.2088	42.9399	40.7787	41.2545	41.2492	40.7764	42.3005	42.0683	42.6666	42.8955	43.7277	43.5794	43.3064	44.3601	44.7972	46.0393	46.9403	45.3792	47.4478	47.3826	47.6328	48.4793	49.2063	49.6377	49.9092	50.049	51.3931	51.8891	52.1396	51.7837	52.5572	53.2434	53.9826	52.4811	54.7946	55.0445	56.4023	58.0813	58.4427	59.8002	58.6673	60.9651	60.1886
	38.6791	35.3612	37.5576	37.0449	38.658	38.0055	38.9712	40.1099	37.803	38.6276	39.0987	38.8708	40.0143	39.6038	39.4699	40.0823	40.4783	40.8948	40.2887	41.319	41.9121	43.1017	43.7123	43.1933	44.5313	44.1217	43.8161	45.0543	45.9172	46.1663	46.0078	45.93	47.2227	48.3599	48.1725	47.6514	48.1592	48.972	49.2898	48.1567	49.8834	50.0075	51.511	52.503	53.2906	54.3543	52.8296	54.6143	54.5078
	37.7927	34.7642	36.1247	36.8739	37.3824	37.6773	38.3613	39.6274	37.8427	38.3735	39.1356	38.2982	39.3969	39.3216	39.4693	40.099	40.9215	40.619	40.4666	41.4733	42.3707	43.2831	44.093	43.7749	44.77	43.6412	43.851	45.3096	45.5641	45.8271	46.4082	45.9582	46.936	47.6073	47.905	47.6071	47.6701	48.6428	48.8703	47.4713	48.7776	48.956	49.6918	51.4318	51.9444	52.1141	50.9953	53.4731	52.2898
	32.0247	28.6819	30.8047	30.8758	31.7924	31.668	32.0609	33.3884	31.967	32.1307	32.1774	32.0639	33.371	33.1527	33.3099	33.5554	33.8691	34.0775	33.7993	34.9932	35.728	36.3832	38.0819	37.4802	38.4461	37.8716	38.1878	39.0844	39.6344	40.3196	40.3911	40.6292	41.414	42.4832	42.2108	41.942	41.8122	42.9222	43.4358	42.0759	43.8264	43.7867	45.1526	45.6257	46.8162	48.0175	46.5889	48.8318	48.1489
	32.2233	29.0786	31.2709	30.9486	32.3634	31.7405	32.0982	34.0141	32.0275	32.3421	32.6551	32.3539	33.3258	33.2341	33.5437	34.2753	34.6792	34.4764	34.2764	35.4653	36.1778	37.0651	38.5829	38.0665	38.7772	39.1674	38.7711	39.6284	40.2797	40.8734	41.3717	41.0264	41.7495	42.5208	42.9316	42.1011	42.604	43.569	44.1402	43.226	45.0393	44.6713	46.5121	47.2256	47.7392	48.8675	47.7108	50.1872	48.8002
	43.7928	40.136	41.9572	42.0881	43.3097	43.0372	44.1288	44.8788	43.4014	43.7175	43.8539	43.3557	44.48	44.8385	44.7825	45.0964	45.3804	45.386	44.9599	46.1064	46.7795	47.9613	49.03	48.1075	49.4722	49.1133	49.2088	50.0552	50.3063	50.5247	50.5717	50.6013	51.4228	52.362	52.0311	51.9714	51.7369	52.3496	52.7192	51.4983	52.6206	52.1061	53.2299	54.1085	53.9993	55.17	53.2805	55.1726	54.0233
	52.7252	48.8321	51.0584	51.2192	52.3656	51.4884	52.5793	54.0942	52.2674	52.3802	52.7566	52.0008	53.6724	53.5286	53.3942	54.14	54.4122	54.7215	53.7926	55.3185	55.9654	57.0733	58.6334	57.8545	58.1943	58.3161	58.1384	59.2466	59.7917	59.6077	59.99	59.7975	60.9221	61.6154	61.6413	60.9575	61.1334	61.7492	61.9571	60.0704	61.7611	61.3604	62.592	63.1733	63.5904	64.2344	62.3268	64.4959	63.4575
	56.5523	53.322	55.6405	55.6424	56.9202	56.5724	57.4157	58.2742	56.6551	57.731	57.6453	56.6808	58.7238	58.9785	59.0944	59.9691	60.513	60.5615	60.1355	61.4576	62.5255	63.8068	65.3612	63.9781	65.722	65.6527	65.3242	66.2442	67.0311	67.9313	67.5571	67.2855	68.8542	69.703	69.7124	68.8429	69.3095	69.6912	69.9944	68.4753	70.2714	70.018	71.0362	72.0062	72.2157	73.1928	71.3425	73.6913	72.0203
	58.2378	55.2534	57.1903	56.8882	58.6047	58.3574	59.3292	60.7098	58.9699	59.6709	59.5526	59.4702	60.9103	60.9319	61.2759	62.0535	62.5497	62.8028	62.8531	64.2329	64.9374	66.3627	67.7308	67.184	68.3275	68.1733	68.3676	69.932	70.6937	70.8554	71.2118	70.8667	72.4003	72.8011	72.779	72.3485	72.5266	73.233	73.6403	72.1961	73.8574	73.6684	74.8775	75.9942	75.8998	76.8909	75.2253	77.7071	76.1977
	68.2443	63.355	66.0321	66.5249	67.5418	67.5842	68.6529	70.3765	68.6669	68.9919	69.1051	68.9652	69.8954	69.4344	70.1562	70.6426	71.1664	71.9006	70.4944	71.9269	73.1626	73.9204	75.4915	75.4524	76.2829	76.1062	75.4978	76.3735	76.9752	77.8442	77.5669	77.672	78.8053	79.374	79.7167	79.934	79.4068	80.2488	80.855	78.8614	80.7419	80.2911	81.5116	82.8514	82.614	84.2075	81.6519	83.8732	83.2097
	50.1891	47.1304	48.5029	49.1087	49.9278	49.3637	50.3405	51.7631	50.1641	50.7135	51.0392	50.3023	51.6495	51.9486	51.9249	52.3118	53.1203	53.0318	52.8299	53.7173	54.2737	55.9787	57.1685	56.5196	57.3853	56.9559	57.2797	58.2328	58.4356	59.2144	59.3518	59.1682	59.6154	60.6293	60.4011	59.6269	59.578	60.1233	60.3493	58.8881	60.4819	59.5188	60.7342	61.2863	61.6323	62.2784	60.1932	61.6167	61.2313
	37.6658	34.7627	37.0474	36.857	38.1363	37.5018	38.3192	39.3358	37.9193	38.4403	38.7507	38.3741	39.6786	39.5183	39.3741	39.8682	40.312	40.4251	40.0187	41.2933	41.6091	42.7545	43.9151	43.5751	44.0093	43.8635	44.3523	44.6953	45.3799	45.8799	45.6558	46.054	46.4331	47.3662	47.2209	47.0327	46.584	47.3016	47.4432	45.9281	47.4985	46.6172	47.6347	48.1285	48.8488	48.9782	47.4846	48.6325	47.5642
	53.0454	49.5866	51.7247	51.3429	52.978	51.77	53.3853	54.4637	52.5591	53.3545	53.7662	52.4999	54.3971	53.863	53.9493	54.6231	54.8378	55.1556	54.6235	55.7922	56.6232	57.7406	58.7579	58.1044	59.0641	58.2802	58.8898	59.9062	59.9933	60.3101	60.9071	60.5198	61.7464	62.3747	61.9515	61.6136	62.295	62.1757	62.8713	60.7186	62.0424	61.8073	62.1854	63.4987	63.4213	64.5633	61.4778	64.0498	63.3718
	42.2093	38.7142	41.1322	41.1411	42.0014	41.8574	42.4201	43.7083	42.4081	42.9206	43.0557	42.9968	43.6386	43.9691	44.22	44.5348	44.7377	45.1901	44.534	45.7219	46.1475	47.0572	48.7433	48.0163	49.506	49.0387	49.0107	49.6757	50.3287	50.6373	50.8857	50.998	51.9821	52.5702	52.8599	52.3443	51.8719	52.774	53.4249	51.4598	53.7649	52.7749	54.468	55.3311	55.6811	56.7461	54.6082	56.8024	56.2936
	42.4747	39.0586	41.2888	41.2718	42.3319	42.2109	42.9318	44.5161	42.6584	43.0995	43.0992	42.7373	43.7256	43.9411	44.0792	44.3347	45.1239	44.8933	44.5683	45.8032	46.2842	47.53	48.8189	48.0446	48.6889	48.646	48.6225	49.7111	50.0536	50.4699	50.4134	50.7945	51.9147	52.8143	52.6667	52.3729	52.7795	53.0353	54.057	52.6247	54.5859	54.2401	55.838	56.4496	57.2891	58.7513	56.9826	59.2911	58.5316
	90.9176	86.8649	88.6783	89.6753	90.4988	90.3413	91.7623	92.7983	90.467	91.7517	92.5411	90.8409	93.7702	92.5226	94.5184	94.9099	95.9399	95.5618	95.4393	97.1421	97.8089	99.8479	101.095	99.8522	102.138	101.69	101.487	103.852	104.225	104.783	106.548	106.604	108.261	109.076	110.067	110.414	111.142	112.428	113.593	111.379	115.345	113.987	116.102	118.771	119.383	121.407	119.902	122.268	121.295
	65.6955	61.5055	63.5307	63.7451	65.3653	64.7151	66.44	67.957	66.9434	67.7852	69.046	68.1716	70.2627	70.6662	71.2148	72.766	73.1464	73.8495	73.7081	75.2342	76.1083	77.7078	79.8247	80.0067	82.3539	82.4881	82.6148	84.0496	85.2828	86.3234	87.3325	87.5234	88.9405	91.2133	92.5348	92.2704	93.8273	94.6099	95.8046	95.1992	99.0345	99.7687	102.504	104.914	107.252	109.768	108.284	113.027	112.997
	44.2884	40.5594	43.0378	42.8222	44.0465	43.921	45.0277	45.75	43.789	44.4603	44.677	44.4834	45.3512	45.1493	45.8643	46.6316	46.7399	46.7518	46.6438	47.7009	48.8443	49.9697	51.6013	51.3503	52.377	51.427	51.4219	52.8348	53.9839	53.8581	54.3509	54.8794	56.0299	57.3955	57.1939	57.5417	57.6828	58.779	59.4786	57.8216	60.4395	60.1612	62.0719	63.0987	63.4864	65.4668	63.5693	66.4797	65.5935
	39.9001	36.096	37.7451	37.2677	38.8678	38.1061	38.8764	40.1406	38.5057	39.4592	39.7176	39.0478	39.7817	40.1663	39.8292	40.5759	41.0647	40.4807	40.6901	41.0904	42.4507	43.006	43.99	42.7508	44.082	43.6464	43.692	44.2475	44.9889	45.631	45.2146	45.3645	46.3925	47.3524	47.1101	46.7063	47.0693	48.1548	48.2076	46.5684	48.5396	48.2608	49.6744	50.2879	51.3067	52.6893	51.0185	53.3629	51.9101
	21.8737	18.2825	18.3904	18.464	14.7739	15.4413	14.4693	13.4573	13.462	13.2981	11.0034	11.9547	11.2193	9.49521	8.3315	6.92189	7.57638	5.58195	7.5531	6.96937	5.57998	3.02493	2.94907	2.91049	4.33302	5.8709	5.60553	7.19818	86.1276	30.5934	31.5024	31.8949	33.1869	34.2616	34.1593	40.927	41.7231	41.1805	42.7354	42.0403	44.2518	45.1647	46.6149	45.4313	47.7708	49.5711	54.1868	52.8722	54.4326
	19.0096	15.8743	15.5145	14.2088	12.3143	13.1864	12.0485	11.3269	11.1687	10.3431	8.9373	10.1223	8.59427	7.39146	5.6135	4.90218	5.19223	3.4775	5.60897	4.7719	3.24532	0.694632	0.812781	0.398731	1.7163	3.03334	2.82034	4.40315	21.2763	8.13179	8.4927	8.70471	9.64769	10.6272	9.5478	16.5378	16.3117	15.2651	15.6036	15.323	16.6078	16.7937	18.4949	16.7411	18.0665	19.5664	22.6005	22.2249	22.6553
	24.9154	21.6081	21.7717	20.1463	17.9233	19.0566	17.3625	17.0158	16.7979	16.2796	14.3092	15.1917	14.3611	13.2503	11.5371	10.1733	11.1615	8.78435	10.7315	10.1588	8.47411	6.65049	6.37628	6.22572	7.5126	8.63809	8.16018	9.57327	18.0066	10.9962	11.7399	11.9663	12.9429	13.9278	12.7768	20.2147	20.1777	19.3764	19.7411	19.9872	21.9755	22.0942	23.9906	22.1374	23.5638	25.4754	28.9399	28.6865	29.1849
	21.5389	17.6908	17.8682	16.6442	13.9959	15.1894	13.9974	13.0637	13.0744	12.5015	10.4093	11.3759	10.6319	9.32704	7.26352	6.3647	6.70874	4.68179	6.54263	6.17981	4.23152	2.31727	2.29283	1.59865	3.87743	4.84023	4.73804	5.99583	-0.843183	2.06592	2.21545	2.47626	3.13807	3.13152	1.90242	9.02194	8.6512	7.5548	7.30269	6.98578	7.68866	7.55066	9.10546	7.23546	7.87761	8.89605	11.617	10.6954	10.9237
	15.6745	11.8195	12.2868	10.3118	8.61068	9.43147	7.92716	7.72188	7.71514	6.84738	5.01416	6.33503	5.27338	3.99936	2.71786	1.15502	2.05466	-0.192783	1.54967	1.1601	-0.843289	-2.88714	-2.76943	-3.75347	-2.3844	-1.38243	-1.56482	-0.435213	115.234	20.7337	21.3694	21.3158	21.8615	22.3239	21.1158	27.9454	27.1211	26.2737	25.6869	25.2564	26.0818	25.2301	26.7881	24.0844	25.2721	25.9612	28.1431	27.8467	27.6195
	22.1532	18.3005	18.5133	17.3515	14.6503	15.7874	14.4188	14.0944	13.4365	12.8645	11.1952	12.5551	11.1289	9.9438	8.37872	6.87929	7.52878	5.83637	7.63448	6.99573	5.64087	3.32064	3.37939	2.40121	4.55766	5.51517	5.43501	6.6451	11.9143	5.62338	6.02799	6.03724	6.6367	7.54744	6.02805	12.2712	12.2908	10.979	10.3962	10.1004	10.6756	10.7795	12.0255	9.82855	10.346	11.2754	13.4422	13.051	12.9698
	34.6823	31.0127	30.5294	30.7857	27.6194	27.8504	26.7967	26.5839	26.0125	25.4407	23.1508	24.26	23.071	22.1281	19.985	19.1791	20.2256	18.0931	20.2057	18.8738	17.3955	15.2932	15.9049	14.9687	17.4848	17.5555	17.9469	19.3149	13.7917	15.5583	16.8238	17.8109	19.2131	20.5749	20.2955	28.0129	28.8969	28.2983	29.2512	29.6506	32.0654	33.542	36.2947	34.5293	36.3636	38.924	42.7645	43.4537	44.3152
	45.0683	41.0675	41.1778	39.363	37.488	38.4989	36.4353	35.6679	35.7313	35.3062	33.0153	33.9167	32.8815	31.3877	29.9831	28.8651	29.2173	26.8236	29.403	29.1796	27.0883	25.2642	25.5942	24.6321	26.2107	26.5005	26.489	27.682	19.8605	24.5443	25.136	24.997	26.3176	27.7367	26.3703	33.9493	32.8576	33.1394	32.6147	31.9506	34.401	33.7898	35.4166	34.331	35.3828	36.0281	39.1197	38.7117	38.6216
	71.2654	66.7944	66.7434	64.5647	61.0765	62.4357	60.9572	61.051	60.0256	58.6521	57.1549	58.7432	55.8038	54.8654	52.4356	51.377	51.2623	48.8028	51.2243	50.4691	48.9296	45.9341	45.6836	45.7167	46.8508	48.5406	47.6319	49.2104	17.9665	41.9139	41.8613	42.0366	42.4894	44.035	41.6049	50.5896	49.102	47.0551	47.4249	47.3575	47.4745	47.6143	49.1037	45.2443	46.2982	46.8708	49.7383	49.1918	48.5646
	27.5782	24.6426	24.4753	23.1951	20.6878	21.6146	20.5537	19.9319	19.1066	18.5513	17.1451	17.7136	16.9861	16.134	14.2558	13.1162	13.6723	11.8873	13.9932	12.5448	11.5045	9.66938	9.45429	8.62901	11.4067	12.4775	12.2641	13.9587	7.73272	10.6231	11.0008	10.7647	12.0108	13.0656	11.4679	18.4126	17.7698	16.8111	16.5623	16.126	17.6661	17.6535	18.6249	15.9391	17.3776	18.357	21.1053	20.9875	20.3724
	39.4293	35.4703	35.5566	34.2082	32.408	32.1928	31.0906	30.5541	29.988	29.3934	27.5133	28.9632	27.9492	26.6148	24.4271	23.5951	24.4882	21.8001	24.2205	23.3723	22.0553	19.2941	19.675	18.8387	20.9283	21.9229	21.5907	22.6096	51.8028	30.4453	31.6064	32.0631	33.3718	33.404	32.5807	39.7713	39.9823	38.2668	39.3464	39.5109	40.6477	40.6124	41.9505	40.0102	42.0383	42.7507	46.0004	45.8442	45.5193
	22.2192	18.6548	19.1686	17.9014	15.4675	15.8319	15.1037	14.1579	13.7595	13.3945	11.5453	12.6513	11.1839	9.89997	8.31822	6.91701	7.67172	5.64744	7.75079	7.21266	5.65298	3.2764	3.50473	2.4999	5.27807	5.50665	5.68515	7.55483	24.603	12.6032	13.0342	13.4346	13.8632	14.9144	14.0913	21.2537	20.6394	20.1596	20.3721	20.3723	21.6507	21.6867	23.0933	21.1007	22.3791	23.7556	26.381	26.3107	25.7778
	34.8805	31.3381	31.457	29.3464	27.0967	28.3876	26.6317	25.7216	25.6778	24.7957	23.4434	23.4807	22.8978	21.5381	19.2811	18.6405	19.1405	16.9629	19.3057	18.7931	17.3138	14.5568	14.392	14.0066	16.5797	17.8114	16.976	18.7519	-30.1911	0.684504	1.16592	1.96609	2.56141	3.74594	2.3814	9.64629	9.55754	8.7374	9.38823	8.71836	10.9325	10.1795	12.0496	11.053	12.1282	13.5348	16.6979	17.2636	16.7158
	54.0671	50.7573	51.5467	50.1051	46.7886	47.7747	45.9048	44.9893	45.1099	44.3386	42.228	43.5775	41.9255	41.0049	38.851	37.4628	38.4413	36.3299	38.3801	37.0674	36.931	33.7249	34.3223	33.3881	35.204	36.4692	35.4567	38.0418	39.7108	37.3216	37.9463	38.5335	39.7353	40.7155	40.139	47.7825	47.7869	47.3466	48.499	48.9764	50.4178	51.6319	53.1455	51.96	54.3299	55.5559	59.6188	59.8492	59.8272
	66.298	62.82	64.1678	63.2217	60.7741	62.4936	60.9262	60.4176	60.792	60.5517	58.5315	59.8936	59.0943	57.178	54.5303	53.4242	54.6595	51.986	54.5564	53.0091	51.626	49.6206	49.028	48.5926	49.3027	50.3102	50.1143	51.3356	84.9453	66.538	67.5057	68.9803	70.8044	71.9649	72.7965	81.3391	82.0626	82.4027	84.368	85.4184	88.5114	90.1721	91.8359	91.1024	93.4579	95.1326	99.3773	99.05	99.1757
	26.314	22.5173	22.7285	21.7694	19.0589	19.4455	18.7523	17.8085	17.5914	17.02	14.8777	15.7144	15.1706	13.551	11.6013	10.8008	11.3155	9.00902	11.2116	10.6406	8.64581	6.98194	7.09414	6.33879	8.36301	9.12906	8.76315	10.5137	21.1648	13.4295	14.1924	15.1934	16.0775	17.0761	16.7857	24.391	24.7323	24.0383	24.6136	24.9587	26.723	27.0252	29.0657	27.1575	28.764	30.3289	33.1169	33.7208	33.638
	57.2769	53.1594	53.5843	53.8552	49.8534	50.61	48.6456	47.2038	47.265	46.2259	44.9438	46.2397	45.0301	42.9841	41.4849	40.0609	41.6385	38.874	41.4326	40.702	39.4241	36.9252	37.3412	36.8863	38.6268	39.5016	38.9561	41.2469	51.3231	45.1682	46.8985	48.6577	49.5976	51.9996	51.692	60.5846	61.5348	62.111	64.079	65.1373	67.0328	69.2311	71.2318	70.5452	73.0417	74.816	79.154	79.8189	80.0603
	22.7027	19.0284	19.447	17.8649	15.3807	16.1761	15.3658	15.1419	14.3163	13.8139	11.8454	13.1236	11.6125	10.7652	8.70836	7.71372	7.94812	6.38742	8.41201	7.56235	5.81144	3.81599	3.77462	3.20707	5.43355	6.27531	6.25001	7.18004	39.6565	14.7781	15.8156	15.3529	16.9323	18.0495	17.1539	24.1731	24.57	23.8584	24.3403	24.1141	26.1527	26.8283	28.354	26.4918	28.8198	30.3307	33.9837	34.4327	35.136
	23.241	19.0575	19.7843	17.8577	16.0383	16.7356	15.4403	15.1408	14.9103	14.167	12.2942	13.2657	11.9321	11.0815	9.29603	8.08521	8.26383	6.05072	8.24961	7.84213	5.84512	3.98697	3.89947	3.19209	5.12073	6.32867	5.46921	7.06943	-5.06428	3.93431	4.4362	4.24124	5.587	5.92458	4.50801	11.2431	10.8912	9.45775	9.6531	8.9021	9.72486	9.5214	11.1759	8.80695	9.56177	10.4805	13.0556	12.4595	11.9495
	41.3394	38.0092	38.325	35.7663	34.3785	34.8943	33.0212	32.6678	31.9653	31.2447	29.7676	30.5987	29.7506	27.9508	26.1144	25.3351	26.0112	23.6292	25.8814	25.1525	23.9072	21.5534	21.4903	20.6668	22.4322	23.6549	23.2151	24.4915	21.1646	23.0923	24.0966	24.4043	25.611	26.2734	25.0952	32.8106	32.4101	31.8036	31.7675	32.3186	33.4225	33.8915	35.2579	33.4178	34.7198	36.023	39.2465	39.2475	39.473
	50.6615	46.5479	46.9592	44.8906	42.799	43.7273	42.1942	41.981	41.063	40.4835	38.4813	39.7181	38.4248	36.8693	34.8727	33.5707	34.9902	32.4048	35.037	34.3497	32.5286	30.3789	30.3465	29.5169	31.5314	32.1866	32.2762	33.6176	8.68812	23.3872	24.4504	24.3981	25.4611	26.4504	25.0536	32.32	32.2456	31.0651	31.1477	30.388	32.0884	32.5532	33.4658	31.8454	32.654	34.1319	36.4629	36.6176	36.3884
	27.6048	23.234	24.0905	23.5499	20.4253	21.369	20.4987	19.3751	19.4911	18.9287	17.0883	17.9583	16.597	15.5009	13.9251	12.6352	12.9831	11.0268	13.4034	12.2951	10.4719	8.89299	8.47221	7.91802	10.4378	11.3403	10.7744	12.8061	20.8384	13.905	14.5957	14.7061	15.3777	16.3836	15.247	22.4135	22.192	21.4648	21.8394	21.2205	22.7626	22.5726	24.2612	22.3233	23.1267	24.7845	27.987	27.6529	27.539
	18.7989	14.7958	15.3342	14.5392	11.6593	12.3296	10.9768	10.5073	10.1048	9.68062	7.71521	8.85201	7.38213	6.10738	4.23109	2.98192	3.72335	1.94045	4.01188	3.37793	1.98382	-0.668359	-0.50269	-1.18774	0.36525	1.39418	1.413	3.15513	-1.34687	-0.220673	0.524242	0.591231	1.31914	1.51115	0.662458	7.74424	7.56395	5.99123	6.07108	6.13039	7.37384	7.34979	9.07727	7.55872	8.0221	9.73399	13.2234	13.2804	13.3715
	7.63779	7.09531	5.62101	4.38072	4.75389	3.89615	4.17766	2.6439	3.50363	3.25227	2.85455	3.01218	2.21333	2.38627	2.97324	2.33419	2.09718	1.47723	2.58457	2.12332	1.83191	2.45239	1.93432	1.9374	3.21546	3.44707	3.4703	4.96234	6.55601	7.65667	8.6862	10.2442	11.6573	12.8407	14.2942	15.8447	17.0155	18.644	19.6978	21.1419	21.8523	23.4824	25.1861	26.0442	26.725	28.2851	29.4699	29.9923	31.6213
	16.6843	15.2629	13.9001	12.9109	13.0531	12.5778	12.3165	11.0975	11.897	11.2395	11.4042	11.2758	10.3121	10.8148	10.9322	10.5971	10.4489	10.7811	11.1631	10.7691	10.7503	11.18	10.6825	10.6212	11.786	11.8107	11.9663	12.7646	13.8254	14.2761	15.1172	15.703	17.3021	17.9597	18.533	20.0785	21.0731	22.2365	22.7657	24.0833	24.9331	25.3725	26.6236	27.2767	27.5157	28.2501	29.0315	29.8006	30.8775
	15.981	14.8967	12.8426	12.3839	12.7448	11.6641	11.969	11.026	11.7824	11.7086	11.1808	11.7018	10.3152	10.7571	10.6331	10.4907	10.1891	10.3244	11.2724	11.2674	10.8574	10.9904	11.2571	11.0108	12.7156	12.3465	12.3739	13.3664	14.7675	15.5499	16.9096	18.4142	20.0911	21.6647	22.7526	24.5342	26.4055	28.3911	29.5143	31.3684	33.0648	34.4404	36.5229	37.5777	39.0481	40.8213	41.3317	43.4015	45.154
	11.0745	9.96961	7.9841	7.60234	7.43781	6.49337	6.88439	5.40341	6.54162	6.09009	5.74308	5.42505	4.31649	4.9141	4.89022	4.77367	4.26836	4.30613	4.09895	4.17436	4.42355	4.50254	4.05833	4.53517	4.9622	4.58593	4.71537	5.73794	6.67813	6.91412	7.71317	8.50258	9.49232	10.3122	10.6229	11.9158	12.5222	13.9992	14.1659	15.4876	15.6211	16.685	17.6297	18.3105	18.1599	18.8257	19.7302	19.7737	21.4669
	6.36529	5.45643	3.92284	3.16741	3.40044	2.25225	2.72023	1.23437	1.96565	1.81489	1.4482	1.70847	1.08907	0.996269	1.32535	1.75424	1.29057	1.28367	1.14277	1.67841	1.90465	1.9958	2.14163	1.58882	3.0763	3.46068	3.89364	5.07856	6.54006	7.01712	8.70462	10.1253	11.4078	12.9704	14.6359	16.5882	18.4837	20.4844	21.6411	23.7977	24.9076	26.722	29.142	30.3837	31.6828	32.3414	34.69	36.0713	37.8317
	15.8827	14.7762	12.9052	12.0491	12.368	11.7165	11.6817	10.4208	10.8609	10.5429	10.4274	10.7592	9.80571	9.91985	10.0346	9.48718	11.9817	9.06482	9.8302	9.21771	9.27176	9.61649	9.42325	9.41843	9.99183	9.62043	9.60738	10.312	11.6965	11.9955	12.5183	13.2453	14.3116	15.005	15.6387	17.2351	18.2136	19.7442	19.9049	21.3466	22.3737	23.2184	24.5667	25.7735	26.4036	27.1544	28.1295	29.2212	29.9676
	13.5433	12.4048	11.1474	10.2931	10.5992	9.70982	9.55096	8.65968	9.14578	8.6293	8.6936	8.41857	7.31717	7.94171	8.06054	7.76668	6.59335	6.30984	6.89996	7.27419	6.87431	7.29025	7.32284	7.1618	7.7093	8.36667	8.89256	10.2742	13.385	14.8229	16.7152	18.9457	20.7858	22.8209	24.7163	27.2332	29.5619	32.2683	33.8197	36.0867	37.9434	39.4561	41.5056	42.9702	44.926	45.9962	48.5117	49.7163	52.2157
	9.71634	8.29307	7.33363	5.79144	5.86319	5.45921	5.37663	3.98361	4.90869	4.5816	4.24821	4.65285	3.26471	3.71114	3.88243	3.29623	0.527298	2.00543	2.74387	2.64909	2.60098	2.70062	2.53778	2.44964	2.64829	2.73008	3.19265	4.65245	6.36627	7.56353	8.92491	10.843	13.1191	14.6657	16.0389	18.1248	20.3085	22.0941	23.4451	25.8679	26.8855	28.7606	31.153	32.1977	33.4793	35.2238	35.8677	37.1834	39.511
	10.4815	9.37612	7.90283	6.96651	7.06636	6.56492	6.13171	5.08189	5.79069	5.44611	5.17854	5.29431	4.65825	5.03098	5.07374	4.98051	4.37367	4.10695	4.85178	4.77951	4.3865	5.10221	4.41596	4.57346	5.64019	4.67094	5.40804	5.29926	6.77982	7.15456	8.50972	9.14768	10.0916	10.9125	12.1875	13.2704	14.4296	15.7954	16.1594	18.4196	18.6134	19.8026	21.5724	22.4402	22.609	23.6996	25.1478	26.1103	26.9224
	12.8308	11.6385	9.89745	8.79485	8.87167	8.62875	8.42054	6.97657	7.71803	7.66753	7.22405	6.63451	6.24479	6.21983	6.42837	5.74898	5.55695	4.83934	5.49791	5.37342	5.00312	5.59324	5.16574	4.90292	5.41884	5.219	5.37364	6.51391	7.3737	8.03506	8.59813	9.42034	10.263	10.7726	11.8172	13.1294	14.089	15.4227	15.7191	17.1969	17.65	18.6426	19.8177	20.0827	20.3221	20.8759	22.0605	22.2498	23.3442
	25.7391	25.8457	44.9498	33.7765	33.3934	32.5862	34.5392	32.281	31.5784	33.4089	34.2326	35.1471	34.2236	33.1547	33.3471	33.156	33.9084	34.2023	32.7636	33.5735	33.5194	32.4786	32.6142	31.4977	34.5502	35.5157	35.5196	35.9346	37.4195	38.0797	37.7227	39.6308	40.7612	43.6166	43.2289	45.5147	45.3122	46.0746	46.5749	47.7258	48.6977	50.2396	51.765	52.688	55.7259	55.4214	56.3447	57.9015	58.6884
	19.9208	19.1235	22.9746	19.5845	19.6287	18.5579	20.1438	18.6809	18.7434	18.9921	19.3462	20.371	20.6739	19.5782	20.1962	19.0336	20.1893	21.1222	19.8436	19.9428	20.4231	19.6185	18.3865	19.2813	22.0885	23.0185	23.1469	22.9969	24.0035	24.5662	24.7584	25.9324	26.4732	28.3559	27.8466	29.0018	28.5107	28.5319	28.2176	29.282	29.3798	30.6027	29.8219	30.2176	32.0543	31.3376	31.6632	31.9133	31.4611
	51.1369	51.5221	55.4749	52.1653	52.1373	50.2891	52.3083	50.4765	49.7337	51.6801	51.6167	52.1298	52.0234	51.5823	52.124	50.7565	52.3368	53.6391	52.4209	51.9569	51.0103	50.9518	49.2273	50.8413	55.3469	55.8867	57.3789	56.1012	56.7835	57.6568	59.5992	59.6062	60.8821	63.3812	61.2704	64.2889	63.05	64.296	64.4081	64.3715	65.0584	65.3804	65.6893	65.0111	68.3622	68.6181	68.6057	68.6809	69.3657
	14.932	14.5795	10.9375	13.1203	13.4618	12.4771	14.0192	12.4229	12.0095	13.5039	13.6864	13.9725	14.2098	13.664	13.734	13.0118	13.5529	14.4433	14.3829	13.6693	13.9242	13.3391	12.3024	12.6617	15.1225	15.6818	16.094	16.1157	17.0471	17.5689	17.7505	18.8876	20.0232	22.2079	22.5899	24.3538	23.4057	24.9772	25.044	26.0572	26.6887	28.3849	28.6009	30.7794	32.0814	33.9176	34.4166	35.4315	36.6248
	17.8147	17.6324	26.2833	19.7368	20.2981	18.7118	20.1142	18.4991	19.0781	19.2847	20.3139	20.6884	20.7833	19.8192	20.2838	19.2611	20.2387	20.4927	20.5164	20.6654	20.8975	19.1751	19.0207	18.6309	20.2045	20.2713	21.7204	21.1947	22.0321	22.9903	23.8366	25.1686	25.7582	28.269	28.2777	29.0663	28.568	29.3213	30.2035	30.7388	30.8287	32.0015	31.5575	33.0736	34.3305	35.4024	35.1724	35.599	35.1688
	26.9021	25.0021	16.6367	22.5557	22.5871	21.954	23.1433	21.0556	21.5577	22.2203	22.9782	23.0881	23.7715	22.4679	23.9656	22.5951	23.6846	24.1536	22.4838	23.6525	23.7608	22.9468	22.149	21.5648	23.0865	24.2791	25.9971	24.1356	25.5639	26.9344	27.1933	27.9731	29.3722	31.6559	31.5373	31.907	31.9848	32.401	34.3761	33.9906	33.6403	36.4177	35.6199	36.6625	38.5968	38.5087	38.9344	38.4017	39.1982
	28.2368	27.4885	24.4344	26.0072	26.163	25.2263	27.3283	25.1795	24.8824	26.2156	26.8174	26.9191	27.8639	26.3065	26.8106	26.0967	26.8043	27.4804	27.3745	26.921	27.0176	26.8175	25.6105	26.9994	27.3881	28.3853	29.0361	28.547	29.767	30.3775	30.7894	31.2714	32.3517	34.6311	34.6244	36.209	35.1763	35.9637	36.1403	37.184	37.4339	38.7372	38.1254	39.0478	40.4346	41.0523	41.0707	41.5918	42.0193
	22.5415	22.3896	29.5203	24.5851	24.8801	23.3034	24.4267	22.8061	23.2635	23.7729	25.1988	24.8989	25.3407	24.3797	24.5374	23.3347	24.6338	24.8512	24.538	24.3704	23.8695	23.385	22.9156	23.1569	25.3841	26.5986	27.3771	26.9225	27.4887	28.4717	30.2289	30.9398	31.6066	34.3502	35.0256	35.9746	35.9949	36.7003	37.2925	38.3505	37.601	39.782	39.6139	40.2515	43.0536	42.4037	42.6187	42.8795	42.2991
	8.20041	8.51044	-2.20044	4.09555	3.79183	3.11258	4.0917	2.65902	2.60125	3.87442	4.42094	4.37381	5.19138	4.40151	4.92458	3.82962	4.33136	5.14032	4.23802	4.17537	4.76963	4.72903	3.60599	3.30854	5.44635	7.06712	7.33868	7.64273	8.56782	9.35693	9.74503	10.4434	10.5817	13.6086	14.1542	16.2844	14.977	15.588	16.2658	17.6229	17.7897	18.8653	19.8119	20.4011	22.6932	23.5513	23.4352	23.9411	23.4015
	7.3118	7.16583	9.00054	7.82086	8.1046	6.85079	8.54138	7.07025	7.335	7.89699	8.40422	8.86137	9.10034	7.93203	8.31321	7.82752	7.92683	9.06928	8.36786	8.44484	8.27995	7.80782	7.33749	7.7839	10.0848	10.9024	11.049	11.4229	12.439	13.2351	13.642	14.9405	15.8675	18.0715	17.9784	19.4822	19.9008	20.0923	21.1292	21.9273	21.8167	23.0022	23.8956	24.4289	26.0167	26.4963	26.5588	26.6691	26.9163
	25.6406	25.7707	41.3472	31.7557	31.7726	31.1036	33.2056	30.8903	31.2817	31.7954	32.6276	32.6394	32.9681	31.7986	31.7615	31.859	32.9142	32.6265	32.2285	32.4381	32.4792	32.2279	30.768	31.4533	31.8444	32.8712	33.1516	33.2205	33.8286	34.6284	35.275	35.965	37.267	39.4305	40.1511	41.8961	41.0541	42.3852	42.5197	43.9331	43.4299	45.3043	45.4425	45.71	48.1485	49.0909	48.799	49.1551	49.032
	33.2345	32.619	41.9462	35.5865	35.5083	33.8312	36.1671	34.168	34.6197	35.4659	35.9929	36.354	36.4584	35.8993	35.7341	35.0842	35.6044	36.4935	35.7639	35.4809	36.154	36.2127	33.7304	34.55	35.0727	35.4773	36.0906	36.5496	37.2529	37.5751	37.7881	38.6326	39.3343	41.2502	40.6022	42.2659	41.2458	41.1451	41.2208	42.0102	41.5231	42.7768	42.8928	42.9913	44.8746	44.7603	44.8168	44.813	44.5127
	8.67271	8.486	14.2605	9.7626	9.96018	8.6178	10.6905	8.53842	8.97997	10.1844	10.2208	10.9214	10.934	10.2359	9.89662	9.91093	10.7622	10.9701	10.4685	10.9957	9.64849	10.8051	8.73948	8.99982	9.58498	11.1103	10.0493	10.6634	11.0714	12.6036	12.0413	12.7657	15.4931	16.3642	16.9755	18.1365	17.9545	19.0342	19.1228	19.5732	20.8995	20.9737	21.9107	23.4435	24.9509	26.7837	26.1625	27.5599	27.3881
	28.9559	27.425	27.7516	27.4408	27.5682	26.5145	28.2552	26.689	26.0661	27.1866	27.7902	27.6373	27.6901	27.3871	27.389	26.4324	27.7044	27.9369	27.0805	27.3623	28.0556	27.4445	25.406	27.0546	28.729	30.1414	30.7192	30.7378	32.1551	31.9084	33.0245	33.6777	34.9008	36.9253	37.2663	38.3305	38.1867	39.276	39.3299	40.7501	40.746	42.0377	41.8173	42.8153	45.1513	46.1549	45.5019	46.7121	47.0914
	38.5266	38.3905	34.4465	36.8324	35.9253	35.2523	37.0904	35.1686	35.4128	36.1334	36.5953	36.8129	38.0267	36.5964	36.9891	36.8	37.5363	38.2242	37.629	37.5706	37.9788	37.5121	36.3442	36.8372	38.6335	39.9675	40.4293	41.0138	42.6241	44.0484	44.9093	47.3541	48.9486	51.6397	52.3949	55.041	55.6113	56.177	57.3178	59.1962	60.6225	62.5882	63.2539	65.524	68.8308	69.175	70.5531	72.7754	73.7197
	50.1935	48.8969	48.8021	48.2085	48.1375	46.949	48.6503	47.1361	46.3624	47.9295	48.0572	48.7676	49.5545	48.4846	49.003	47.7194	49.4041	49.6	48.8468	48.8627	49.6859	48.4779	46.9965	48.2139	50.3595	51.6065	52.6503	53.6212	55.7268	57.9011	59.1933	61.0022	64.7667	68.5287	69.5916	73.0488	74.1226	75.9124	77.3808	80.5466	81.924	84.6813	85.7869	87.8906	91.7448	93.1528	94.3635	94.785	95.1161
	43.6996	43.4654	51.4338	46.5524	46.6168	45.0373	47.5109	45.7584	45.5097	47.0237	46.8989	47.4983	48.4546	47.8095	47.5454	47.075	48.8036	49.5747	48.4874	48.0168	48.6138	48.5486	46.6334	47.7221	50.396	51.0882	52.1728	51.9033	53.1738	54.2782	54.7427	55.5186	57.3257	60.1253	59.8442	62.0781	61.5724	62.4114	62.5842	64.681	64.1278	65.6427	65.8245	66.765	69.6781	69.5897	70.5045	71.286	71.8027
	39.4753	39.5664	41.5589	39.6586	39.8804	38.5679	41.263	39.1415	38.165	39.7555	40.332	40.4608	40.726	39.34	40.0671	39.2542	41.0177	40.9065	40.6394	40.5307	39.8685	39.2239	38.7044	39.1024	42.0865	42.4605	43.9116	44.5057	45.663	47.5444	49.2063	51.1061	53.0446	56.5053	58.3815	61.3881	61.3817	63.3616	64.5757	66.9686	68.8576	70.6301	72.7472	74.2123	77.3164	78.1992	78.6582	80.177	81.3851
	64.0398	64.1578	62.4327	62.6108	61.5881	60.9006	63.4865	60.0908	60.0252	62.2027	61.7324	62.3745	62.7965	61.3822	61.9573	60.9846	62.6859	62.7246	62.3709	62.0138	62.2511	61.2015	59.8978	61.6627	62.6897	64.2871	66.3152	66.9678	68.1071	70.2573	70.8825	72.7426	75.4159	78.7521	80.6382	83.5715	84.6291	85.7019	87.1158	90.0576	91.2087	94.8025	96.5375	99.5908	102.865	105.477	106.4	109.21	109.882
	68.7426	69.1228	63.833	66.636	66.0359	64.5417	67.1494	65.1569	64.9587	65.6195	66.4465	66.6742	68.6742	66.6301	66.9957	67.2451	67.8304	68.8437	67.5689	66.5136	67.3624	66.7866	64.9181	65.6591	68.615	69.766	71.2577	72.233	75.0068	75.9369	77.2154	80.9278	82.9129	87.988	88.5751	92.576	92.6231	94.1735	95.9185	100.346	101.413	104.064	106.878	109.806	114.317	115.592	117.18	118.268	119.906
	50.9701	50.0989	51.1892	50.5552	49.8519	48.7738	51.3655	48.6814	48.7184	50.1106	50.2857	51.1232	51.7045	50.4613	50.7039	50.758	51.6468	52.0409	51.7306	51.0758	51.5615	50.9091	49.283	50.542	53.338	55.0727	56.2195	56.3719	58.3255	60.6392	62.1424	64.6613	66.6588	71.0269	72.7207	75.9742	76.7252	79.4537	80.3043	83.6376	85.3541	89.6057	91.7557	94.4392	99.0662	101.564	103.964	106.32	108.438
	48.946	47.9471	47.1735	46.5653	46.3032	45.5814	48.0704	45.9284	45.6332	47.203	47.6974	47.2182	48.3672	47.3037	48.3937	46.9916	48.4619	49.0834	48.3885	48.2433	48.102	46.9781	46.7862	46.8074	48.5463	48.711	49.5341	49.9026	51.2039	51.1181	52.977	52.9878	55.0087	57.1752	56.9469	57.7971	57.6228	58.9386	58.8106	61.054	60.849	60.9975	62.0602	63.162	65.9791	66.6635	66.5247	67.2624	68.0719
	46.0409	46.0482	58.0349	52.0261	51.4707	50.4747	52.5773	50.8388	49.8032	51.9027	51.8437	52.6535	53.377	51.4591	52.0564	51.4497	52.2914	53.3298	52.2521	51.8137	52.1335	51.7949	50.6951	51.2569	54.2003	55.3717	55.4681	55.7607	56.6127	57.7352	58.4935	60.1922	61.6545	64.4538	64.2156	65.3964	65.8022	66.6466	66.5323	68.5065	68.1702	70.186	69.4682	71.6275	74.3614	75.3815	75.2449	75.9681	75.4066
	18.0578	18.0554	18.9577	18.7281	18.3636	17.735	19.6051	17.1079	17.2428	18.9592	18.9812	19.1044	19.748	18.418	18.9621	18.8861	19.8051	19.9863	19.1642	19.301	19.9671	19.0089	17.9139	19.3595	21.0451	21.7932	22.3098	22.6634	23.0137	24.4712	25.1326	26.1918	27.4103	29.5514	29.681	31.6002	31.0804	32.8601	32.9052	34.5342	35.6254	36.7124	38.1134	38.9248	41.5475	42.1606	42.9533	44.2251	44.8468
	41.0425	41.6605	38.0582	39.3131	39.2527	38.4016	40.8178	38.5193	39.3138	39.288	40.495	40.942	41.146	40.0293	40.7187	39.6832	40.7404	41.3838	41.0606	40.914	40.6872	40.0275	38.5809	39.0034	40.6066	41.9835	42.8672	42.5961	44.2405	44.978	46.4626	47.0059	49.1089	51.7197	51.684	53.885	54.399	55.2342	56.8141	58.3107	59.3807	61.1378	62.0066	63.9726	66.3578	66.9556	68.7164	68.4609	70.456
	40.9996	40.7427	39.4964	39.8701	39.9097	38.4084	40.7431	39.1496	38.6744	39.5602	39.995	41.0431	41.4017	40.28	40.3603	39.8121	40.5246	41.4588	40.9981	40.9494	40.7305	40.5118	39.4105	39.67	41.8389	43.0949	43.9754	44.5623	45.0227	45.599	46.3593	47.4699	48.9136	51.6618	51.7759	53.8803	53.1456	54.3791	54.9325	56.1308	56.1466	58.2826	58.7245	60.2913	62.2179	63.0858	63.5077	63.8526	64.4108
	19.8317	20.058	12.7325	16.3947	16.7737	15.7178	17.3984	16.2074	15.6627	16.6659	16.9075	17.5017	17.5967	17.5656	17.3484	16.6192	17.8024	18.2396	17.4068	17.9161	17.3118	17.5124	16.0415	16.9691	17.983	18.7515	19.5067	19.5655	19.8406	21.6276	21.6223	22.4224	23.7912	25.0229	25.8878	27.2045	27.0459	27.684	28.1802	28.7354	28.9964	30.3118	30.3347	31.3809	33.1317	33.8188	33.7318	34.3671	34.5624
	29.8727	29.6517	27.7936	28.6028	28.2471	26.9378	29.0715	27.4761	26.2857	28.309	28.6615	28.5335	29.0925	28.2058	28.8023	27.3935	28.7163	28.9182	28.005	28.5373	28.0898	27.7661	26.2008	27.0039	29.2306	30.515	30.8547	30.7002	31.7599	32.2912	33.4312	34.4001	36.4916	39.8856	38.8983	41.7537	40.7652	42.7756	43.2478	44.62	45.1708	46.7548	46.4537	48.2728	50.8793	51.516	51.4136	51.7007	52.5187
	25.9818	25.9014	26.1041	24.6335	24.8782	23.4148	25.2893	23.133	23.5306	24.3238	25.0339	25.1027	25.7068	24.7455	25.6782	24.2635	25.4604	26.2268	25.4211	24.9031	25.2485	24.3036	23.813	24.033	24.5751	25.4745	26.4424	26.2284	26.8606	26.9871	28.4322	29.2371	30.3699	32.074	32.3174	34.0208	33.93	33.9435	34.1345	35.5855	35.9378	37.1215	36.9918	37.7676	40.0654	40.9028	41.2638	41.5242	41.9647
	49.2108	48.6709	51.9508	49.8856	49.4015	48.0804	50.862	48.7953	48.3891	48.5106	50.3208	50.1054	50.1488	49.095	49.8602	49.9355	50.3675	51.0092	49.7445	50.125	50.3758	50.1364	49.0098	49.872	51.5068	54.0613	53.5299	54.1308	56.0643	56.8023	57.0908	59.6081	60.6371	64.3871	65.3581	67.1742	67.1786	68.2507	69.2367	71.0231	72.1404	74.3443	75.1024	77.5131	80.4556	80.8055	81.8432	83.1761	84.7906
	53.282	53.3892	58.6399	55.6176	55.4152	54.0946	56.5835	54.0305	54.8566	55.1362	55.7491	56.6009	58.0497	56.5045	56.1329	54.8216	56.8774	57.3308	57.1732	56.4292	56.1816	55.6909	54.6217	55.1797	56.6577	58.1046	58.7927	59.618	60.419	61.383	62.3087	64.1593	65.0637	67.5333	68.2623	70.1019	70.4203	70.4829	70.776	72.5538	72.0732	74.7869	75.5169	76.2475	79.0429	80.2703	79.772	81.214	81.4896
	37.2031	36.3822	43.6818	39.8515	39.523	38.2839	40.6446	38.4491	39.1398	39.9569	40.7378	40.4798	42.0489	40.355	39.9754	40.5755	41.4586	42.2341	41.4681	40.8936	41.5066	40.4301	38.9164	40.0565	42.058	43.3841	43.4407	44.835	45.4175	45.59	46.4059	47.4115	48.4906	51.0097	51.1658	52.5404	51.9077	52.231	52.2876	53.4328	53.2069	54.7908	54.5802	56.2817	57.5289	58.152	57.1988	58.7413	58.6983
	14.5238	13.5969	15.9523	14.8114	14.3829	13.4616	15.2208	14.162	14.4614	15.0071	15.1268	16.0469	16.1654	15.1996	15.7851	14.459	15.5272	15.2173	16.0817	16.0155	15.8547	14.858	13.817	15.0758	15.945	17.1613	17.6352	17.3989	18.3608	18.2581	19.755	19.2573	20.3564	22.4795	22.4508	23.4101	22.7575	23.1866	22.7863	23.4934	23.6245	24.9813	24.394	24.6508	26.8293	27.319	26.716	27.2666	26.8111
	20.9398	20.6154	19.3821	19.6972	19.9501	18.9009	20.9759	19.3248	19.1487	19.9215	20.1318	21.0788	21.2039	20.4844	20.6874	20.2462	20.8591	21.6178	20.8711	20.9456	20.8411	20.493	19.3016	20.3675	21.3462	21.9144	22.743	22.7988	23.5672	24.5848	24.7511	25.5711	26.6578	28.9328	29.2007	30.4188	29.7809	30.0512	31.2086	31.8527	32.2483	33.0878	34.0425	34.6189	36.6893	37.0997	37.7073	37.6234	38.5413
	20.7483	20.2047	17.9599	18.8405	19.0243	18.8358	20.1039	18.6545	19.4068	19.6423	20.2124	20.1217	21.1551	20.0497	20.0879	19.1317	20.6452	21.0832	19.1127	20.1815	20.6365	19.4635	18.2919	19.687	20.328	21.1726	21.6774	21.4414	21.9644	22.9914	22.7369	23.6863	24.5186	26.2921	26.0688	27.1083	26.0139	26.6699	26.6206	27.0302	26.3377	27.7708	27.0927	27.8164	30.0569	29.4352	29.5452	29.5843	29.7116
	18.3772	18.6015	22.5347	19.4588	19.9414	18.6455	21.0214	18.9377	18.9143	19.4226	20.227	20.1378	21.0561	19.9626	20.5584	19.7983	20.8222	21.6203	20.4394	20.4401	19.9509	20.3439	20.0353	19.586	21.0505	21.766	21.7005	22.3262	22.5601	23.102	23.9966	24.5544	25.3305	28.2131	28.4754	28.8427	28.431	29.347	28.8615	30.2877	29.5293	30.797	30.6895	31.4215	33.4015	33.5119	33.7115	33.9865	34.1029
Time (s)	0	2	4	6	8	10	12	14	16	18	20	22	24	26	28	30	32	34	36	38	40	42	44	46	48	50	52	54	56	58	60	62	64	66	68	70	72	74	76	78	80	82	84	86	88	90	92	94	96
[truncated: 273 more columns]

## Sheet: Panel M
NS shRNA 2uM CPA	20.6874	20.8312	20.7479	21.2821	21.1816	20.6169	20.93	21.246	21.4468	21.2889	21.5701	21.2243	21.2608	21.1387	21.2129	20.4936	20.7795	20.8752	20.9952	20.7466	20.9076	20.7511	20.3093	20.5301	20.2846	20.9773	20.9874	20.6221	20.9872	21.5302	22.0314	22.1949	22.3692	22.5005	22.6405	23.1117	23.7298	24.2908	24.6388	24.8349	25.1518	26.3799	27.059	27.4468	27.9684	28.0608	28.7765	29.6546	30.3351
	31.5444	31.5716	31.5949	32.1928	32.3263	31.9988	32.0021	31.9394	32.6638	32.7162	32.9854	32.9441	36.6158	37.0509	36.3713	36.5477	36.7394	36.5746	36.5021	36.7141	37.1335	37.0384	37.6778	37.3543	37.1941	39.8138	39.414	40.0745	40.0181	40.2451	41.5099	41.5885	42.0558	41.82	42.4185	42.9841	43.5696	44.1717	44.0547	44.9437	44.6165	46.2447	46.4011	46.5044	47.545	47.3576	47.8826	49.0939	48.9183
	54.4461	54.0209	54.2921	54.887	54.8536	54.5146	54.1392	54.4413	55.0807	54.4301	54.5236	55.0181	58.402	58.1231	56.9362	57.2276	57.9298	57.6353	57.2019	57.659	58.1299	58.3353	57.4566	58.2404	58.3681	58.2711	58.3096	57.7469	58.448	57.6475	59.8676	60.5092	61.2789	61.5383	62.3952	63.5407	64.4714	65.8872	65.812	67.0603	67.7965	68.6509	70.1808	70.779	71.7772	71.4047	73.2013	74.6463	74.7309
	21.3248	21.2578	21.2043	21.381	21.4869	21.2533	21.2574	21.5252	21.8463	22.1564	22.1756	22.1958	23.4932	22.9004	22.1584	22.3374	22.4289	22.6642	22.264	22.1581	22.8553	22.7872	22.5441	22.7389	22.9341	25.104	24.64	25.3342	24.8093	25.289	26.4165	26.4912	26.9793	27.6177	27.8747	28.6729	29.6226	30.3999	31.0547	32.3091	32.4679	34.4363	35.6565	36.5003	37.5204	38.2528	38.8192	40.3045	40.6947
	39.1642	39.435	39.5629	39.4913	39.7337	38.9123	38.8289	39.1382	39.7298	39.9843	39.43	39.5237	40.1639	40.2718	39.785	39.5773	40.1068	40.5532	40.4023	40.6842	41.1698	40.9388	41.0258	41.082	41.941	42.4533	42.5404	42.8432	42.7416	43.4654	44.8874	45.6724	46.0895	46.4671	47.8008	48.7976	49.8035	51.2424	51.5562	52.1527	52.7954	54.9254	56.5276	57.5189	58.1416	58.978	60.0749	61.8398	62.8074
	27.9413	27.8255	27.8538	28.1639	28.2073	28.5467	28.3987	28.5484	28.9037	29.3368	29.5909	29.1296	30.4901	30.4088	29.9574	30.1152	30.3343	29.8709	30.2032	30.1658	30.2985	30.5622	30.5379	30.687	31.0499	31.4146	31.5497	31.7129	32.8118	32.346	34.0465	34.8577	35.7419	36.4763	37.083	37.9295	39.3928	40.4496	41.4612	42.7897	43.8416	45.7514	46.4915	48.6213	50.0293	50.2004	51.4654	52.9911	53.7413
	29.4296	29.4936	29.2778	29.5933	29.88	29.505	29.6346	29.6815	30.1032	30.2792	30.2044	30.3171	29.7642	29.7886	29.213	29.5414	29.4781	29.4987	29.1883	29.4628	29.4792	29.3355	29.0632	28.896	29.8475	30.3064	30.4814	30.703	31.4724	31.6393	33.5169	34.2735	34.4028	35.2606	36.1792	36.8583	38.1594	39.1301	39.6138	40.5689	41.3808	42.884	44.2497	44.925	45.9438	46.1302	47.8492	48.4966	48.8451
	58.5989	58.6323	58.8588	58.8497	58.8499	58.4968	58.2996	58.8729	59.7439	59.1807	58.7555	59.0869	56.8811	57.1794	55.9694	56.7019	56.2983	56.4287	56.572	56.2171	56.3228	56.5078	56.1867	56.3973	57.201	56.7003	56.0143	56.8751	57.3161	57.3536	59.3929	59.9853	60.3236	60.8947	62.0174	62.4863	63.9047	64.9549	64.8866	66.0872	66.4819	67.0815	68.3807	70.1311	70.3461	69.8219	71.2523	72.0808	71.9375
	20.7801	21.138	21.1087	21.2607	21.5774	21.2532	21.9249	21.8754	22.5837	22.401	22.2719	22.5647	23.1761	23.3107	22.8462	22.8498	22.6464	23.1486	22.8583	22.924	22.9505	23.5778	23.4113	23.749	23.9373	24.7776	24.7437	24.7813	25.1054	25.4084	26.9603	27.5164	27.859	28.5973	29.2084	30.3366	31.0268	31.2349	31.9116	33.2999	33.9418	35.6471	35.9747	37.3551	37.875	38.618	39.7691	40.4027	41.2881
	40.8558	41.1791	41.1031	41.6135	41.9453	41.2947	41.7493	41.7975	42.1812	42.3106	41.7328	42.1381	39.7709	39.8496	39.2992	39.5015	39.9842	39.4576	39.7256	40.2283	39.8589	40.2269	40.0702	40.0381	40.4253	40.1824	41.043	41.0699	41.9676	41.9619	44.2127	45.7029	46.6712	47.2675	48.9447	49.7679	51.2371	52.8587	53.5238	54.7245	55.5879	57.7176	59.2035	61.344	62.4499	63.5121	64.6073	66.8568	67.2931
	23.6312	23.834	23.4289	23.5313	23.4097	23.177	23.5718	23.3773	23.9347	23.2673	23.9005	23.9389	25.6376	24.7908	24.2047	24.2459	24.9974	24.5324	24.6877	24.4861	25.0567	24.9312	24.2869	24.9134	24.4814	25.004	25.4494	25.2086	26.0125	26.4045	27.7751	28.7288	29.136	30.1489	30.7903	31.3984	32.8163	33.8802	34.8281	35.4541	36.2407	37.8973	39.344	40.4575	41.7322	42.268	43.3204	45.1911	45.2131
	27.4396	27.7655	27.7931	27.6754	28.2686	27.8024	27.7831	27.3469	28.6869	28.0253	28.2037	28.3996	28.7618	28.8093	27.9151	28.3698	28.4409	28.0035	28.4878	28.2473	28.9549	28.6834	28.7521	29.1398	29.0062	28.8382	29.3121	29.343	30.5422	30.9198	31.6486	32.7064	33.5265	34.0298	35.045	35.8672	37.4352	38.2877	39.1772	40.2274	41.4153	42.8856	44.1314	45.7268	46.4112	47.6705	48.7839	51.0028	51.2584
	33.4227	33.2571	33.2406	33.8521	33.9518	33.5301	33.5965	33.2853	34.2962	34.3637	34.1714	34.1513	34.1664	34.089	33.2916	33.8353	34.2171	33.5911	34.1614	34.6748	34.6541	34.8642	34.6264	34.6437	34.9345	35.0042	34.4633	34.7143	34.5904	35.5002	36.9706	37.965	38.086	38.813	40.0881	40.4959	41.6795	43.0956	43.3417	44.8458	46.0853	47.2804	49.4097	50.5234	51.7479	52.3245	52.7234	54.4027	55.0924
	35.5222	35.7098	35.6485	35.9353	35.9516	35.4234	36.1665	35.7661	36.7172	36.2312	35.8383	36.0476	37.8002	37.0923	37.2933	37.6397	36.9166	37.3453	37.2895	37.4985	37.5549	37.4589	37.2475	37.2713	37.8273	38.9756	39.7333	39.9395	40.6648	41.3124	43.0236	43.841	44.8252	45.8344	47.5575	48.5045	50.0284	51.9103	52.7805	54.1489	55.4354	57.3069	59.039	60.5099	62.0295	63.5955	65.119	67.1939	67.2407
	20.9593	21.1415	21.4064	21.5807	21.4906	21.4622	21.3526	21.6203	21.9663	21.7758	22.0908	22.1272	22.6892	22.6764	21.8898	22.0519	22.1293	22.1394	22.514	22.8254	23.0191	23.1237	22.9849	22.9544	23.438	23.1433	23.2663	23.4684	23.9637	24.1573	25.6468	26.2152	27.4059	27.9064	29.3253	30.6494	31.8899	33.1524	34.549	35.5272	36.4754	38.5584	40.6326	41.8727	43.2763	44.221	46.3136	48.5766	49.3232
	19.684	10.9293	10.7233	10.7383	10.6714	11.2266	10.7573	10.8221	11.3244	11.0854	11.3204	11.439	12.1448	12.068	12.0709	11.9357	11.7504	11.8794	11.5194	12.1758	12.0608	11.9256	12.1237	12.12	12.4024	12.3357	12.4295	12.7589	12.7444	12.9936	13.7371	14.2244	14.7641	14.899	15.5621	15.983	16.7894	17.3197	18.3522	19.0591	19.0085	20.6503	21.1048	21.9793	22.9414	23.2012	24.4405	25.454	25.5304
	27.5225	27.727	27.3043	27.6379	27.6933	27.8489	27.0641	27.7107	28.1597	27.9023	28.0227	28.4622	28.6233	28.3778	28.099	28.1028	28.5356	28.2257	28.1244	27.9606	28.3799	28.0464	28.3904	27.9095	28.5647	28.8453	29.2026	29.1344	29.2271	29.9503	30.7744	31.6571	31.5497	32.3026	32.6451	33.6709	34.3369	34.9747	35.6665	37.1152	37.1765	38.6935	39.6589	40.8883	41.2434	42.3026	43.1869	44.0145	44.8355
	39.3743	38.6647	38.566	39.042	39.2764	38.3097	38.5017	38.6287	38.8912	38.4982	38.8498	39.4013	40.2666	39.9896	39.5032	39.6801	39.8505	39.4021	39.6725	39.7523	39.8993	40.0511	39.3008	39.7319	39.9651	38.8129	38.6803	38.9509	39.054	39.8799	40.9058	41.1854	41.2665	41.9988	42.6295	43.2171	43.6724	44.6561	45.2346	46.4461	46.5649	48.2025	49.0329	49.5843	50.251	50.6976	51.8445	53.1765	53.6091
	20.4068	20.1314	20.2333	20.5409	20.9633	20.6147	20.3614	20.6212	21.0643	21.2148	21.5123	21.4139	21.3965	20.9537	20.6848	21.0648	21.2337	20.8885	21.0778	21.2181	20.8696	20.982	20.8317	20.7379	21.0257	21.4028	21.1251	21.4535	21.6702	21.8166	22.6609	23.02	23.2695	23.1489	23.9956	24.6957	25.1184	25.7887	26.2761	27.0627	27.6352	28.4483	29.2477	30.4925	31.221	31.89	32.8462	33.6594	34.1898
	35.0833	34.678	35.2518	35.6819	35.6219	34.9381	35.1922	35.1242	35.8287	35.6107	36.1657	36.0263	37.0345	36.1184	36.1351	36.0653	35.9067	35.5033	35.4939	34.987	35.6742	35.2496	35.0412	34.9011	34.8548	34.9235	35.4129	35.7529	35.7557	36.5614	37.3333	37.7123	38.1056	39.0406	39.7969	40.463	42.1911	42.9927	43.5346	44.7093	45.1928	46.8298	47.9469	49.0475	50.4423	50.3082	51.8552	53.0749	54.1319
	41.5875	41.5355	41.3638	41.8183	42.7665	42.1187	42.6785	42.0156	42.8532	43.3633	43.4782	43.9283	39.7383	40.48	39.6124	39.0944	39.4459	39.251	39.49	39.4893	39.4013	39.6361	39.2877	39.8051	39.4498	40.061	40.2064	40.7219	40.8197	41.4568	42.4284	43.8371	44.2944	44.6659	44.7355	45.8457	46.8692	47.6674	48.4035	49.1048	49.955	51.4391	52.7883	53.2921	54.5999	54.9651	56.1082	57.6724	58.1454
	45.6169	45.6585	45.4909	45.6555	45.5631	45.0691	45.5414	45.7744	45.7511	45.0371	45.3139	45.507	43.5138	43.4371	42.5198	42.454	42.2202	42.2862	42.3935	42.2984	42.2735	41.849	42.061	42.0235	42.3067	41.9873	42.1482	42.4985	42.8609	43.132	44.0173	45.6283	45.2656	45.7053	46.4293	47.336	47.6818	48.9409	49.4725	50.2093	50.7068	52.4902	53.6058	53.962	54.9141	55.1324	56.349	57.0398	57.7733
	37.1415	37.406	37.336	37.4271	37.6597	37.3731	37.222	37.9063	38.3535	37.6381	38.1669	38.4524	39.7762	40.2014	39.6652	38.9932	39.0978	39.3896	39.5828	40.0078	39.4174	39.7386	39.1471	39.4433	39.8452	39.5821	40.0287	39.9691	40.0186	40.4759	42.0561	42.6983	42.7576	43.5265	44.1095	44.4203	45.8529	46.6481	47.2271	47.8334	48.1876	49.8214	50.7057	51.3037	52.7458	52.1499	53.4409	54.9991	54.3506
	27.8114	28.1277	27.7692	28.046	28.6857	27.6848	28.3689	28.659	28.925	28.9722	28.9216	29.2185	30.7718	30.4812	30.0086	30.2251	30.1818	30.2762	30.325	30.6766	31.1622	30.43	30.5172	31.0805	30.5559	30.8294	31.1473	31.2052	31.652	31.6388	32.6883	33.7152	33.884	33.9718	34.7666	35.4079	35.8502	37.2055	37.5822	37.7024	38.7012	40.3611	41.2171	41.6019	43.2158	42.7356	43.2267	44.7375	44.7944
	32.1623	32.3628	32.3009	32.51	32.6637	32.8253	32.7072	33.0155	33.7599	33.4341	33.097	33.8961	36.5031	35.6434	35.5096	35.5504	35.5279	35.7977	35.9659	36.0229	35.8195	35.9494	36.5704	36.2582	37.135	38.3241	38.4596	38.9063	39.0025	39.785	40.5613	42.0184	42.6545	43.0789	43.4878	44.1783	45.0653	46.0959	46.6203	48.444	49.35	50.7654	51.6868	52.6807	54.2592	54.8635	55.525	57.7844	58.1899
	29.9917	30.0966	29.6414	30.4729	30.4281	30.3137	30.1452	30.3312	31.2779	30.8765	30.9981	31.672	32.699	33.0479	32.1339	32.6633	32.6342	32.7552	32.7236	32.7122	33.401	33.2525	32.5227	33.1081	33.8905	34.1617	33.9207	34.476	35.1073	34.689	36.8362	37.3621	37.7349	38.5133	39.4059	40.1603	41.2513	42.1351	42.4279	43.9568	44.6387	46.3374	47.7631	49.0554	49.1233	50.3219	51.1556	53.553	53.5791
	18.7122	18.7212	18.7123	19.6769	19.0556	18.9045	19.008	18.8413	19.2591	19.0695	19.0754	19.4016	20.4513	20.6123	19.7292	19.6106	19.6973	19.8023	19.5881	20.0338	19.7891	19.5538	20.002	19.9752	20.0972	20.3706	20.531	20.9679	21.1895	21.2761	22.3559	23.4448	23.186	24.6008	24.6653	25.5117	26.5039	27.2746	27.6449	28.6187	28.5975	30.2359	31.6558	32.5204	33.1511	33.6151	34.0844	35.4538	35.7771
	28.8064	29.0243	29.0007	29.572	30.2241	30.3757	30.5013	30.5499	31.12	30.9382	30.6542	30.4868	30.4713	30.2836	29.5452	29.7591	28.983	29.7915	29.6586	29.373	29.8695	29.6572	29.3026	29.2837	29.9112	29.4572	29.5817	29.7847	30.1575	30.5148	31.5732	31.999	32.7263	32.8686	34.1228	34.5533	35.0691	36.2833	36.7586	37.7944	38.6875	39.9279	41.0236	41.6522	42.4301	42.8317	43.9522	45.1096	45.7361
	31.2706	31.925	32.3121	32.4446	32.1865	32.1112	32.0793	32.4028	32.4575	32.5544	32.8256	33.1862	32.085	32.5419	31.5711	31.8702	31.9428	32.0368	32.2815	31.9081	31.6905	32.0393	31.8526	32.1237	32.3518	31.9795	32.0006	32.2165	32.1631	32.5298	33.5025	34.3098	34.4871	34.8183	35.082	35.7462	36.8434	37.3649	37.6433	38.2766	39.0191	40.0338	41.4394	42.4314	42.8047	42.7269	44.0706	45.2921	45.323
	34.2034	34.468	34.0643	34.909	34.9035	34.6966	34.8803	35.1672	36.0805	35.6414	35.1791	35.7406	35.8455	35.9109	35.4827	35.7842	35.3985	35.8769	36.0101	36.348	36.2293	36.2278	36.1284	36.8456	37.146	36.7557	37.1558	37.448	38.3078	37.9228	39.9329	40.7558	40.9321	41.8545	42.1137	43.7552	44.4121	45.2199	46.1112	46.6823	47.2093	49.4428	50.1598	51.4167	52.3746	52.9146	53.8442	55.3827	55.9104
	29.5355	28.9859	28.9144	29.0527	29.8718	29.9298	30.3045	30.911	30.3981	30.7089	30.8645	30.9594	32.4157	32.2848	32.1822	32.0496	31.6701	31.6711	31.8664	31.7148	31.8757	31.7014	31.8348	31.7132	32.218	32.2441	32.1583	32.9991	33.3163	33.0059	35.0433	35.7903	36.0217	37.2291	38.3611	39.2597	40.2562	41.2007	41.7914	43.2176	44.3378	46.7693	47.0516	48.9501	49.6922	50.5667	52.1179	53.787	54.3485
	17.3901	17.2589	17.0647	17.3771	17.8653	17.5548	17.592	17.3748	18.0424	17.8434	17.968	17.9094	18.3809	18.1246	17.447	17.8473	18.2468	17.8317	17.5028	17.5869	17.74	17.7481	17.3819	17.272	17.9508	18.385	17.8489	18.5625	18.9698	18.814	20.1341	20.4332	20.9906	21.6003	22.4883	23.0913	24.3267	24.3394	25.2918	26.3871	26.5745	28.1332	29.0155	30.0975	30.8724	30.8972	32.6263	33.5396	34.6787
	27.4809	27.7219	28.4563	28.5867	28.3103	28.549	28.2643	28.2624	29.0043	28.8864	28.454	29.0249	28.5185	28.5688	27.6956	28.4954	28.8368	28.8183	28.4539	28.5404	28.646	28.4797	28.9516	28.6202	29.1385	29.6548	29.55	30.1669	29.5952	30.0782	31.3474	31.5938	32.0815	33.117	33.2847	34.2213	34.9709	35.8721	36.4854	37.5975	38.0768	38.9178	40.0291	41.5812	41.7875	41.9869	43.0716	44.4566	44.8776
	34.7094	33.5349	33.0762	33.3434	32.8821	32.2358	32.6716	31.1605	30.8546	31.037	30.252	30.1708	30.3448	29.4095	30.126	28.7067	28.7	25.9538	27.7609	28.4455	28.1461	28.4556	28.0291	26.3054	26.8255	25.8522	26.3662	27.959	28.9894	30.9331	32.5757	33.9281	36.3496	38.0565	38.9826	41.5845	42.9572	44.7216	46.4757	48.5319	50.7141	51.5742	54.1216	56.1208	56.367	58.0374	60.1711	61.8594	64.1414
	46.0059	44.7046	44.7599	44.1316	44.1838	43.2641	43.804	43.0826	43.472	43.3688	42.5528	43.3314	43.1381	44.1248	43.7869	43.5153	43.5659	41.8838	42.9999	43.6486	43.726	44.7294	44.7141	42.406	43.382	45.042	46.1745	47.1239	49.0302	51.5518	53.0448	54.6423	56.7265	58.7912	60.5506	63.9802	65.3481	66.2598	69.0439	71.7823	74.1244	75.97	78.7067	80.0998	82.2553	84.2003	86.3927	87.4255	91.2649
	24.6045	23.7484	23.7694	23.5531	23.0581	22.6621	22.8943	21.8216	22.0797	21.2763	21.3532	21.1138	21.2699	21.7096	21.1382	22.2184	21.5207	21.3648	21.0959	21.8375	22.4433	21.9179	22.1181	20.8866	21.3008	22.8588	23.2097	24.1528	25.8373	27.1413	29.1682	30.6816	33.253	34.3274	35.7827	38.6264	40.6674	42.4253	44.8944	47.7848	49.6465	51.5624	54.5017	56.2675	57.8517	60.0395	62.476	64.8733	67.4639
	51.5056	50.796	50.5927	50.521	50.4972	50.4128	51.0651	49.8735	49.8608	49.7087	48.696	49.0455	48.8206	50.0035	48.8914	48.6589	48.5726	46.7724	48.2257	48.0918	48.5764	49.191	49.0715	47.4494	48.7827	48.9394	49.59	50.9309	52.1705	53.8581	55.9442	57.6064	59.6374	61.4285	63.7518	65.5668	68.1403	70.1891	72.0899	74.8948	77.2029	79.9574	82.413	84.5406	86.9724	88.2675	90.9563	92.3316	96.2139
	38.4517	37.9405	37.7306	36.7071	36.0393	35.4392	36.1614	34.8642	34.1769	33.655	33.8649	33.5102	33.0943	34.4928	33.3265	33.0217	32.5276	31.6742	32.2525	32.0872	32.5053	32.5756	32.209	30.7262	31.6865	32.93	34.2348	35.643	37.9931	39.7166	43.0828	46.5366	49.8495	51.6492	55.2721	59.3597	63.2494	66.4595	71.1423	75.2593	79.9772	84.0401	89.1213	94.2109	97.7016	100.114	103.684	107.61	111.873
	29.0232	28.5982	28.737	28.8016	28.1873	28.6348	28.6723	28.1906	27.8334	27.5811	28.0152	26.9853	28.0385	28.2674	27.7611	28.2259	28.0319	27.0561	27.3371	27.1633	27.7209	27.3517	28.032	26.7305	27.1557	27.5407	29.1463	31.4346	32.6106	35.1348	38.5914	40.323	43.3725	46.2911	49.1125	52.9443	55.3659	58.6078	62.9534	65.5099	69.0985	72.9918	75.9682	79.4211	83.2778	86.4159	89.414	92.2619	97.5227
	24.5529	24.4253	24.2654	24.4677	24.1285	23.3003	24.5395	23.666	24.1795	23.8246	23.7211	23.5891	23.5335	24.7668	23.42	24.1141	24.7093	23.037	24.4273	25.1658	26.2485	25.7283	25.8708	25.303	25.2806	25.7461	26.9399	27.5925	29.7971	31.9726	34.2769	36.0439	37.8792	39.2805	41.3599	44.1283	46.8932	47.5319	50.5726	53.2581	55.408	59.0284	60.9544	63.1468	65.9232	67.1006	70.7034	73.165	75.0295
	17.8141	18.2456	17.5219	18.1784	16.9431	17.4703	16.9328	15.5789	16.5355	17.0484	14.8361	16.5565	15.7757	16.9266	17.1199	17.1465	16.7982	16.2969	16.709	17.5881	18.8272	18.033	18.4113	16.3168	17.8356	19.2474	19.8621	20.7605	22.0903	24.4279	25.5627	28.1253	29.1469	30.2405	31.3172	34.9093	36.8638	38.0134	41.5505	43.98	45.3979	46.5859	48.7265	51.4194	53.2067	54.211	55.9712	57.252	59.496
	23.242	22.7684	23.5058	21.5613	20.8932	21.6271	21.1167	20.0714	19.4132	19.6789	18.9484	19.7944	19.1834	19.2862	19.0598	20.2028	18.9866	17.3191	18.4332	18.3285	19.3344	18.2236	18.2693	18.5056	18.2688	18.4302	19.0316	19.2574	20.8259	21.3179	23.4934	25.1877	27.5182	26.9904	28.5828	31.2014	32.6798	32.3342	35.3776	37.8067	39.881	40.8787	43.6706	45.387	46.1685	48.4626	48.9567	50.3659	52.9229
	34.7451	33.5208	33.7971	34.5866	34.2069	34.5736	34.9171	33.9312	33.8405	32.715	34.1373	34.3142	34.1979	34.8411	34.9966	34.6788	34.4994	31.6034	33.5369	34.4508	34.7145	34.2333	34.1931	32.7501	33.7652	33.933	33.6527	34.2674	35.6828	38.2886	40.531	42.1547	44.845	46.6481	47.6015	49.3032	50.7782	51.4129	53.1759	55.229	56.5978	58.0498	60.415	61.2395	61.447	64.6881	65.7443	67.2331	69.4677
	27.5957	27.1081	27.2866	26.9531	26.7167	26.9347	26.5899	25.4863	25.6174	25.8457	25.2799	25.1825	25.0685	25.1829	25.3273	24.8379	23.4214	23.1674	23.6296	23.3056	24.2489	24.8902	23.7211	22.928	23.8002	23.5046	23.6911	25.0551	25.9644	27.6801	29.4764	30.3443	31.4839	33.1385	34.6116	35.8776	38.0611	38.964	40.5205	42.8615	44.9319	45.982	47.128	48.7529	50.9102	52.6767	53.3184	54.6356	57.3474
	9.48422	8.15637	8.44526	8.15567	8.02277	8.0193	8.00656	7.07275	7.25775	7.39059	6.67655	6.52307	6.92443	7.06585	6.67801	7.62563	7.38414	5.82461	6.64032	7.0681	7.33346	6.96195	6.28016	5.78714	6.16432	7.16407	7.70994	8.52616	9.65246	10.9181	11.9451	14.0461	14.7415	17.2456	18.4244	20.9157	22.3736	23.4214	26.3232	27.6906	29.374	30.7457	31.7516	33.4451	34.9325	36.9785	38.543	40.5224	42.5338
	33.7693	32.6877	33.2025	33.6865	32.6826	32.5939	33.1104	32.121	31.7648	32.0265	31.6624	31.896	31.6126	32.2362	31.7114	32.0389	31.868	30.8607	31.1476	31.5382	32.0209	31.8919	31.7507	30.757	30.8349	31.5991	32.317	32.3148	34.2499	35.5998	36.6822	38.1303	39.6843	40.9842	42.0353	44.5284	45.3719	46.7825	48.4237	50.5757	52.307	53.1823	55.7027	56.4074	57.7266	58.8274	60.2761	61.516	62.9689
	23.7424	22.5742	22.84	23.627	22.5436	21.5996	22.9111	21.7984	21.6262	21.3281	21.3506	21.7587	21.2449	21.9831	21.8029	22.1955	21.8303	20.4057	22.4633	23.5837	23.7258	24.5706	23.9684	22.5957	22.1085	21.1581	21.077	22.0638	23.5524	24.4403	26.1637	26.8795	28.5356	30.2544	31.0345	33.3474	33.9738	35.4659	36.616	39.1535	41.4958	43.2467	45.2403	46.5486	48.4993	51.014	51.6694	53.5237	56.3113
	58.2282	58.1463	56.7559	55.986	55.2967	56.6116	55.1009	54.2469	55.546	55.9993	54.2851	55.068	54.0571	55.1853	55.5361	54.761	54.2791	52.3806	54.215	54.2203	55.052	55.137	56.2042	53.1973	53.8757	52.6964	52.5352	54.1365	54.7953	56.4535	58.4806	58.8441	60.7559	61.6441	64.4667	65.7335	67.1268	66.9266	71.1525	72.0988	74.5938	76.4746	77.2898	79.5046	80.0175	81.0475	83.2793	84.1579	86.1185
	57.1106	54.998	55.2414	55.1029	54.7955	55.3429	54.6392	53.2411	53.8153	53.3684	53.806	53.6284	53.1063	53.3006	53.8668	55.2595	54.3996	54.0662	54.504	54.9519	54.6007	55.381	55.2448	53.5201	54.604	53.3997	55.172	55.6576	57.8043	60.0784	61.0384	62.1558	65.9645	67.1652	68.9935	71.2099	73.6804	75.116	77.4662	81.0429	82.2921	85.6183	87.8231	91.8655	94.3559	93.7193	97.8666	98.4425	101.572
	30.92	30.7092	29.8657	30.2664	29.5642	29.2951	29.0444	28.4227	27.6721	27.3296	27.8347	27.9946	27.7427	27.8616	27.8561	27.2189	26.3288	25.2425	25.9299	26.5813	27.0629	26.7994	26.8286	25.4014	25.5791	27.8892	29.1618	29.3353	30.9844	31.3218	33.4215	33.4366	34.8767	36.4803	38.5573	38.7501	40.6483	42.2051	44.097	45.7529	47.115	49.0455	51.0823	52.7206	55.0554	55.4794	57.5593	58.7765	60.3838
	43.7893	42.4682	43.4634	44.1838	41.9906	41.9886	42.2206	41.0562	40.8173	41.2803	40.8203	40.6924	40.5478	40.0194	40.5473	39.7464	40.4261	38.1153	39.2453	38.735	39.7607	39.4696	39.293	38.5818	37.8979	38.0885	39.0052	38.2	39.895	41.6837	42.2136	43.2674	44.9238	45.3351	47.7179	48.7318	50.4578	51.1933	52.2991	53.9744	56.3833	58.4458	58.5509	61.7154	61.858	62.9315	65.9533	65.5211	69.2148
	30.8736	30.7573	30.4265	30.5637	30.5932	30.3803	30.0981	29.2481	29.257	28.9997	29.2701	29.296	29.0413	29.1868	28.9995	29.8214	29.2823	28.5292	29.1502	29.3469	29.5498	30.1892	30.5696	28.6265	29.2236	28.6382	29.2005	29.3291	31.0218	32.8121	33.6217	35.4167	37.0267	37.8235	39.5607	41.7529	42.9851	44.2249	46.6173	48.6151	51.0411	51.903	54.2529	56.9885	58.1509	59.3656	60.8485	62.5788	65.3091
	32.4329	32.9063	31.5128	32.1067	31.5027	31.2802	31.5916	31.0081	30.5035	30.3388	28.6766	29.6816	30.6153	31.5329	30.9415	31.0932	31.0201	29.8946	30.2276	30.0577	30.95	29.9117	30.5313	28.5386	30.1209	28.1317	28.4804	29.014	30.0569	32.1653	32.4592	34.1301	34.2694	35.6152	37.1843	38.803	40.526	42.2778	42.9327	44.4405	47.5008	47.0896	49.3208	51.8562	52.3091	54.088	55.9292	58.78	60.8917
	21.1369	20.865	20.8656	20.6008	20.6399	20.173	20.6034	19.5293	19.1677	19.2823	19.126	18.5493	18.8411	18.7587	18.8758	18.7143	19.1984	17.3495	19.2603	19.0261	18.4655	18.4971	18.2882	17.2325	18.3806	17.95	18.0296	18.9544	19.7548	21.9733	22.7688	23.2493	24.346	25.5464	26.8143	28.8588	29.9175	31.3486	34.1061	34.982	36.4455	38.7143	40.2415	41.5245	43.6478	44.3951	45.8738	48.1509	50.1747
	17.2665	16.5951	17.6954	17.2426	16.8664	16.9955	17.1947	16.3765	16.0977	16.3587	15.5115	16.1882	15.6096	15.4671	15.4814	15.8409	15.7338	14.5167	15.0427	15.6617	16.1475	15.8994	16.1577	15.3618	15.3302	16.0145	16.7232	17.2036	18.0242	19.1193	20.1725	21.5259	22.4187	23.2014	24.8171	26.4711	26.9181	27.9861	29.7651	31.4475	32.2672	34.0956	34.3882	36.4973	38.2323	38.4772	39.3183	41.1976	43.436
	41.6765	41.1451	40.0284	40.6498	39.2516	38.7431	38.7608	38.7716	38.694	38.0847	36.8713	36.3475	36.1269	36.1842	36.3978	36.0475	35.5073	34.0415	34.7533	34.5424	34.2343	35.5885	35.4107	33.5525	33.9989	34.2891	34.3222	35.0415	36.2649	37.4527	38.525	38.3912	40.1691	41.9481	42.3261	44.6086	45.5222	46.4283	48.5186	49.4516	50.0505	51.725	53.7288	53.973	55.8504	55.9194	57.3153	57.9811	59.8175
	70.6889	68.5212	69.0888	68.2773	67.89	67.7828	67.1488	65.8925	66.5079	65.5666	64.2627	64.4765	63.4789	63.7306	63.5871	62.6315	63.043	61.0675	61.9869	62.6271	62.5728	62.7771	62.9573	60.1761	61.1508	61.1548	62.2248	62.5974	64.0651	65.5509	67.41	68.1284	70.3433	71.4122	71.8191	74.4217	75.9964	77.1366	79.8326	82.1333	82.9299	84.3025	86.711	87.3004	88.7984	89.9494	92.259	93.6091	95.5468
	62.7205	62.564	61.1535	61.4081	60.7331	60.4295	60.3636	58.6716	58.6534	59.6842	59.0722	58.7584	59.8172	59.5864	59.6499	59.8924	60.8342	58.815	59.0694	59.7502	59.553	60.2259	59.621	58.2609	58.5153	58.4158	59.4987	60.3498	61.8099	64.0124	65.491	66.3559	67.6235	69.602	70.9743	74.0388	75.2489	76.688	80.1258	81.9694	82.6664	84.6314	85.9471	89.008	89.1136	90.9505	91.5598	92.7834	94.9885
	57.0587	55.0663	56.4251	56.1012	55.1031	54.9319	55.863	54.4765	54.2136	54.1429	53.9353	53.3801	53.4911	54.1562	53.3036	54.4656	54.3401	52.8481	52.7952	53.9061	54.0254	54.1679	54.1371	52.9848	53.2348	52.6689	52.7415	54.7076	56.2598	57.1152	59.0926	60.2768	62.1522	63.7218	65.1109	67.6677	69.6395	70.684	74.1684	76.7331	79.8245	81.7173	84.0783	85.9932	88.114	90.5107	92.2845	93.8708	97.1507
	29.5643	28.6898	28.4726	28.4011	28.788	28.5327	28.8802	27.5071	28.2209	27.973	27.5482	27.2888	27.3904	28.3313	26.8913	28.3933	27.5059	26.4889	27.463	27.5003	28.0126	28.9399	27.7738	26.6205	27.8331	27.8284	28.4806	29.4056	29.835	31.7922	32.2198	33.7048	35.0054	36.5964	37.3214	39.4734	40.5385	42.3375	43.6675	45.194	47.4231	49.0795	50.172	51.464	52.3629	54.646	55.1585	57.1228	59.5979
	47.1187	46.7919	46.1673	46.3164	46.1895	44.5653	45.4623	44.9535	44.9213	43.8116	45.0043	44.6399	44.1895	43.958	43.5165	43.2475	43.4842	41.4357	42.5441	42.4851	43.3882	43.7768	43.1599	41.4907	42.6196	41.9541	42.354	42.3441	44.1264	45.9743	47.6266	49.1795	51.0296	52.046	53.5078	55.8318	56.0736	58.9412	60.3138	62.6753	64.7183	65.3865	68.2655	70.433	71.3963	72.1094	73.5467	74.9564	77.4218
	23.7092	23.6894	23.4652	23.4774	22.4851	22.4724	22.2759	21.2473	21.1329	21.2987	20.7794	20.6587	20.7707	20.8149	20.4979	20.4671	20.2367	19.1354	19.9065	19.9516	20.199	19.9739	20.2606	19.0706	18.731	19.519	19.7065	20.6298	21.4889	22.5755	23.9368	24.9505	25.8662	26.4639	27.7652	29.1864	30.4468	31.3125	33.3377	34.8839	36.7151	38	39.3855	40.7725	41.9279	42.3993	44.6223	46.3112	48.4125
	47.081	45.5064	44.9346	44.5241	44.7773	44.0529	45.1151	43.9235	43.3304	44.6883	43.4959	43.517	43.3152	44.0986	43.7568	44.5889	42.8694	42.1248	43.1613	43.4561	43.7511	43.2128	43.2277	42.0012	41.928	43.2549	44.6785	44.4392	46.515	47.8849	48.3365	50.022	51.2092	53.0899	52.6047	54.5596	55.1234	55.9419	57.8408	58.9095	60.7671	60.5254	61.7152	63.4619	64.0686	64.6981	67.4447	66.9185	69.4327
	36.7163	35.7744	35.4816	35.3798	34.7637	33.8915	34.6955	33.0981	33.9324	34.1189	33.5149	33.5128	32.8509	33.3954	33.1907	32.2298	32.979	31.5693	32.804	32.4943	32.9092	32.9557	33.1295	31.3367	31.9255	31.7305	32.6148	32.8985	34.229	35.0656	36.6131	37.4193	39.0957	40.4569	41.3198	43.1263	45.125	46.3604	47.3084	48.7919	50.9965	52.8524	54.1124	55.937	57.0893	59.007	60.9692	62.8695	65.3739
	24.6135	24.2836	24.3926	24.0002	24.4783	23.6608	24.4024	23.3776	23.7653	23.3985	22.9305	23.1048	23.7119	23.1931	23.1359	23.5007	23.3936	22.1242	22.8926	23.2577	23.4053	24.251	23.6858	22.9656	22.7948	23.0672	22.9389	22.8581	23.9974	25.4555	26.8655	28.2675	28.8178	30.5274	32.0124	33.8475	34.8652	36.0893	38.1223	39.2597	41.1741	43.798	44.6265	46.4118	47.1066	49.5627	50.6553	51.5888	54.1955
	47.0134	45.6952	45.4488	46.3618	45.7303	45.4747	45.4198	44.8199	44.3122	43.8821	43.6889	44.0568	43.9587	43.8922	43.5861	43.0171	42.9007	42.0516	42.4374	42.4199	42.5265	43.0158	42.6936	41.0683	42.0431	40.1723	40.2181	41.5025	42.2925	43.7358	44.5121	45.6119	47.2058	48.7121	49.789	51.0589	52.7919	53.2912	55.93	57.3847	58.8072	60.9558	62.5835	63.5984	65.0548	65.8858	67.411	69.0954	71.5677
	48.5803	47.2346	46.3058	46.0291	45.4896	45.2323	45.1101	43.2545	43.5449	42.8016	41.819	42.2092	41.8902	41.7509	42.1886	41.9373	41.7211	40.9863	40.7564	40.9166	42.004	43.4137	42.9314	40.9063	41.0767	41.9997	41.6824	42.2971	44.5986	45.5501	48.2903	49.1758	50.6554	52.3662	53.1782	55.4863	57.8265	60.7999	63.892	65.3378	66.8255	67.6649	70.1482	70.8443	72.1052	72.5803	73.623	74.8708	78.1403
	13.7724	13.909	12.9962	14.3021	13.3386	13.3678	13.4267	12.72	12.5488	12.5324	12.4152	12.9318	13.2655	13.741	12.8567	13.0865	13.1604	12.3032	13.1043	13.3605	13.7547	13.3969	13.6795	12.8957	13.0219	13.7269	14.6821	15.854	17.6045	18.6956	19.7624	20.284	21.325	22.8551	24.6577	26.0474	27.2633	27.9864	30.5252	32.0939	33.8251	34.7205	36.8491	38.9172	40.4318	42.058	43.3827	44.9334	47.3516
	17.2417	16.1267	16.3528	16.2192	17.175	17.117	16.8275	15.2489	16.2132	16.1532	15.1507	16.7363	16.5271	17.5797	17.8609	17.8898	18.4593	17.3329	18.398	19.195	19.2229	18.5971	18.7072	17.5722	17.3298	18.0737	19.1057	19.4779	20.4519	22.217	22.247	23.5214	24.7135	25.7831	27.3058	28.967	30.4293	30.5651	31.975	33.588	35.3341	36.3142	38.2719	39.9088	40.7297	42.1878	44.0348	45.3382	47.6847
	13.3786	11.9211	11.9557	12.2803	11.7974	11.291	11.5949	10.9289	10.7894	10.5478	10.1128	10.4278	10.8546	9.96762	10.1325	10.1829	10.0974	8.1529	9.4679	8.8887	9.01046	9.9712	9.93338	9.00439	9.16508	8.97224	9.49499	10.0127	10.6633	11.7431	12.3904	12.6944	14.6708	14.5182	16.5099	16.8503	18.9461	19.2812	20.1523	21.124	23.3979	23.6663	26.0309	25.435	27.6679	27.9175	28.9207	29.8088	33.1699
	30.2799	28.8448	29.9223	30.0369	29.3584	27.7953	28.0111	27.3017	26.0505	25.5615	25.1864	24.8906	24.3223	23.7229	24.1754	22.8015	23.3643	20.7919	22.8367	22.3144	22.2092	22.6049	22.946	20.5726	22.2847	21.9369	22.9592	24.6931	25.5261	26.9793	29.0633	28.6753	32.1182	32.6571	34.093	36.2988	38.2658	39.6927	41.9936	43.2827	45.4996	47.3982	48.4851	50.2254	51.8831	52.9441	55.2575	57.338	60.9471
NS shRNA 5uM CPA	30.4731	29.6336	29.6409	28.1943	29.7163	29.2204	28.5134	28.3577	28.1773	28.8264	28.5288	28.6432	27.9562	27.8926	28.7205	27.8145	28.0157	28.0672	27.3628	27.8064	27.9123	27.2478	26.9601	27.4943	27.5258	27.8871	28.2222	28.5445	28.6744	29.721	29.8971	30.704	32.2384	33.0993	33.9957	34.4938	35.5245	36.8183	38.9051	39.4262	40.5714	41.1852	42.2659	42.9567	44.1353	44.8398	45.5063	47.2942	48.1586
	32.4443	32.3743	31.9036	30.3419	32.9917	32.6073	32.4092	31.7292	32.3669	32.4134	33.1239	33.2007	33.0088	33.6026	33.047	33.3495	33.672	34.1577	33.8443	33.8941	34.6643	34.2448	34.0164	34.3517	33.9674	37.203	37.9526	38.4817	38.5018	39.8031	40.8434	42.1981	44.1231	44.8774	46.8081	47.5689	48.8039	51.1362	53.8962	55.6864	56.1533	58.9326	60.201	61.1435	62.9189	64.8309	66.0503	68.0578	69.5377
	32.9659	33.0566	32.6176	29.9518	32.9944	32.7994	32.7682	32.251	32.6279	33.1158	33.2992	33.6686	32.8957	33.3862	34.0393	33.9676	34.7572	33.7953	33.331	34.285	35.095	34.6603	34.2468	34.9898	34.7675	37.8518	38.9631	40.7922	40.9347	42.3972	44.3731	46.72	48.6451	50.1015	52.1036	53.8398	55.981	58.472	61.5131	63.6176	66.3184	66.9267	71.0026	72.9755	76.2018	77.507	80.5148	83.6303	86.426
	41.2659	41.6285	40.8114	39.0575	41.5905	41.4604	41.495	40.7717	41.1819	42.6836	42.3666	42.2121	43.0655	42.4851	43.4519	43.4289	43.8476	43.0126	42.7337	43.658	45.0968	43.9516	43.1401	44.2071	43.8792	44.9922	45.7794	46.596	47.1072	47.9445	48.789	50.3918	51.4004	53.4825	55.1481	56.0811	56.9588	58.8685	60.9299	62.4135	63.8608	65.5229	68.3767	69.1008	70.8556	72.4789	74.3998	76.6134	79.0806
	44.9783	45.2126	44.7727	43.9881	44.9591	44.9444	44.7921	44.4137	44.2332	45.0308	45.1775	45.2439	45.1882	44.6469	44.9745	45.1792	45.3206	44.8808	45.3846	45.049	45.809	45.6654	44.9187	45.8545	45.678	47.2519	48.036	48.9972	49.2328	50.3935	51.8629	52.8485	54.5211	56.1297	57.8383	58.4527	60.3372	62.1165	64.3728	64.8592	66.8369	68.3921	70.2817	71.3139	72.6441	74.2225	75.9296	77.6248	78.4395
	34.1298	33.7781	33.443	30.7857	33.4384	33.6574	33.2664	32.5524	32.9573	32.897	34.1427	33.8915	32.2811	33.1177	32.0267	32.7568	33.3065	32.5231	32.1301	32.6815	33.1626	32.8558	32.4018	32.4983	32.1615	34.8485	35.6244	36.0811	35.8607	37.4611	38.4418	38.9479	41.6235	42.6871	43.8272	45.3353	45.5846	47.7969	49.1024	50.8751	51.8056	53.7245	55.3376	57.3873	57.4377	59.2615	61.0896	62.8276	64.8204
	37.0213	37.2103	36.5339	35.2121	37.2462	36.5504	35.9221	35.88	35.5588	35.8012	35.9744	35.7236	35.7675	35.4537	34.8952	35.6117	35.6118	35.3858	35.2084	35.3039	36.3942	35.3053	34.6815	35.6319	34.9879	36.9248	37.7139	38.9551	38.9229	40.6301	41.8761	42.594	43.6179	45.1637	46.7074	47.8088	49.0467	50.4684	52.8748	53.9233	56.4528	56.5884	60.017	61.0963	62.9135	64.5266	66.6961	68.7027	70.3755
	31.2718	31.3327	30.1714	28.4866	30.3898	31.0096	29.9263	30.1179	30.4881	31.04	30.5819	30.3465	30.5026	29.8897	29.9901	30.0444	30.0108	28.6577	28.5701	28.1215	28.9052	27.1937	26.6496	27.3429	27.4459	28.4993	29.7098	29.7341	30.4012	32.4296	33.7272	35.7447	36.6836	38.5162	39.6578	40.9024	42.4282	44.8702	46.4443	47.0378	48.5272	50.1769	52.5935	53.4109	54.4803	56.1724	57.0748	58.7623	59.7905
	37.0425	36.5311	36.4162	35.9843	36.7268	36.9058	36.873	36.2934	36.2356	36.9526	36.766	37.188	36.5209	36.7345	37.183	36.2533	36.911	36.6841	36.4799	36.6391	37.2423	37.4054	36.5558	37.3993	36.7894	38.571	39.1964	40.3787	40.3993	41.906	42.3533	44.4034	45.7204	47.8859	48.6888	49.3688	51.3599	52.7706	54.9403	56.5234	58.4097	59.0054	62.2187	63.3075	65.3416	67.6392	68.2674	70.795	71.4061
	29.4484	29.5586	29.0953	26.1031	28.6064	28.2812	28.4428	28.2697	28.3903	29.5673	29.0835	29.5671	29.069	29.4831	28.8624	28.8794	29.1585	28.8537	28.4698	29.149	29.2869	29.5292	28.1723	29.336	29.009	31.6933	32.016	32.8906	32.5737	33.408	34.8522	35.5601	36.9654	39.5526	40.1495	41.677	42.1104	43.963	45.6851	46.9877	48.771	49.1473	50.6519	52.0135	53.4011	54.4551	55.4266	57.3546	58.7504
	33.1109	33.0068	32.4864	31.3199	33.0148	32.2729	31.2272	31.5138	31.6578	32.4616	32.092	32.4976	31.8081	31.558	31.7287	31.2952	31.1009	30.8926	30.9524	30.5381	31.7586	30.8612	30.2729	30.32	29.9555	31.4773	32.9227	33.6411	34.7904	35.8779	37.7172	39.0837	40.8003	42.7778	44.4479	44.948	46.6104	49.3976	51.1661	53.4353	54.5648	56.787	59.3625	61.0154	63.4286	65.0589	66.6302	69.188	71.6843
	59.1598	59.2456	58.8461	54.9785	58.2892	58.8873	58.4965	57.9125	57.9021	58.6189	58.9577	58.8121	58.2755	58.2026	58.2028	57.8075	59.2418	57.1659	57.4656	57.563	59.1595	57.1245	57.5278	58.5716	57.7507	58.2791	60.4308	61.44	62.45	62.8289	63.374	65.7223	68.0034	68.799	70.8965	72.1344	73.686	76.1042	78.6468	80.4778	81.5691	83.6008	86.6114	88.4164	90.3154	91.1668	93.0027	95.6051	98.3245
	27.3935	26.6019	26.406	25.4828	25.7576	25.9998	25.4453	24.7348	24.4643	25.1246	25.7087	26.0087	25.3924	25.9136	25.7151	25.2668	24.6625	25.0993	24.021	25.1264	24.5913	24.5998	23.6546	24.4311	23.7812	25.9255	26.2272	26.3255	26.7439	26.9114	27.6778	28.9954	30.5112	31.7356	32.0203	32.7669	33.4104	34.8744	35.9023	36.7827	37.6066	38.7942	39.6571	40.9222	41.9396	44.006	44.0577	45.3792	45.9699
	32.1225	31.8181	31.5647	30.3015	31.6581	31.8705	30.9523	30.7302	30.7538	30.9962	31.3878	30.6971	30.7261	31.1578	30.8671	30.4348	30.7264	30.853	30.7159	30.2758	31.1725	31.1046	30.5167	31.1316	30.6638	31.253	31.9413	32.2216	32.7385	34.4776	34.7253	36.4449	37.648	38.8969	40.1393	41.4557	42.3777	44.1823	46.1198	47.3416	48.5741	50.3268	52.0055	53.3638	55.1346	57.464	58.3201	60.489	61.9574
	40.8612	40.1065	39.928	40.2606	40.1999	40.4241	39.8586	39.4185	39.3789	39.4573	40.6642	40.8967	40.0917	40.6284	40.1615	40.5242	39.9385	39.769	39.4373	39.5972	40.8782	40.1082	38.9554	40.6177	40.2034	42.3915	43.1609	44.1166	43.9695	45.6287	46.7683	48.3812	49.9521	52.2499	53.938	55.9176	56.9904	59.2378	61.5575	63.7265	65.6769	67.802	71.2406	72.5977	75.3416	77.2924	79.5846	81.8251	84.4021
	24.3379	24.3574	24.8702	23.3328	24.6415	25.1387	24.6578	24.7197	25.1959	25.9385	26.1116	26.1937	26.1518	26.2184	26.7925	26.5919	26.6645	26.0908	26.0121	26.82	27.482	27.153	26.2714	27.9931	27.1985	34.5067	35.8313	36.5586	36.0079	37.9347	39.6491	41.8072	43.5731	44.9714	47.0019	48.4641	50.1661	52.6103	55.2759	56.7411	59.2454	61.2127	64.5238	65.7781	67.992	70.0492	73.1092	75.0972	77.1805
	38.9754	39.3277	38.9332	36.6101	39.3013	39.8725	39.6692	39.973	39.891	41.3092	41.5095	40.7723	40.2448	40.9055	40.4022	41.004	41.2891	40.5662	40.6153	40.7414	41.9743	42.2243	41.8485	42.6726	41.9892	44.4514	45.1464	47.6124	47.1371	49.0962	50.7829	51.9517	53.8456	56.3729	59.0298	61.4961	63.0364	64.9841	67.8224	69.0546	70.9341	72.8368	75.5676	77.3544	77.9004	81.3973	82.8081	85.9409	86.9478
	25.0341	25.4478	24.7431	23.5081	25.0801	24.7643	24.9898	24.9204	24.6096	24.4996	24.7621	24.9208	25.2811	25.2402	25.5937	25.5547	25.4778	25.0795	24.5496	24.7547	25.0403	24.599	23.6375	24.0676	23.3734	24.8868	25.4499	26.0712	25.9125	27.5609	28.0238	29.6892	30.5359	31.6227	32.6347	34.5466	35.2755	36.9842	38.7417	40.2688	40.8666	42.2335	44.3661	45.607	47.0649	48.4258	50.243	51.7868	53.8547
	26.7918	26.8053	26.3977	25.6212	26.4433	26.6764	26.9903	26.5737	26.0321	25.6723	25.9227	25.3579	26.1492	25.4061	26.3007	26.0827	26.0015	26.2541	26.7055	26.2047	25.718	25.7853	25.2595	26.6716	25.2296	28.1798	28.7136	29.7441	29.917	31.1236	31.0514	33.0712	34.0853	35.4614	37.3923	38.0918	41.1826	42.3375	45.384	45.8682	47.6581	49.3027	52.1067	52.9464	55.2172	55.8657	58.2296	59.1877	61.7233
	47.2118	47.0937	46.1804	43.1458	48.0392	48.1845	47.0159	47.0352	47.3534	48.0281	48.0043	48.5702	48.3611	47.8307	47.7982	47.9797	48.6291	47.9461	47.3504	47.8571	49.345	47.8321	46.9849	47.7111	47.3754	46.4169	47.6065	49.0185	48.6524	50.7444	50.783	52.4768	54.1839	56.4377	58.0414	60.306	61.5708	64.4609	67.4288	69.9337	71.7218	73.5778	76.1117	79.1603	80.3986	82.5171	83.6302	86.1908	88.4931
	39.5818	39.2485	38.6627	36.0135	37.245	37.7746	36.4433	35.8502	35.861	36.0246	36.7663	36.4707	36.1927	36.1495	35.4467	35.3431	35.4735	34.9536	34.6154	35.169	35.211	34.1881	33.9201	34.2697	33.8089	32.7512	33.4321	33.4401	33.9291	34.8666	35.6585	36.7594	37.8682	39.2188	40.5457	41.9073	43.0377	44.2382	46.3002	47.9662	49.302	50.2762	53.4633	54.8321	56.5688	57.1383	58.8501	60.7415	62.345
	36.2992	35.7415	35.6577	34.3527	35.3228	35.5376	35.6402	35.5905	36.4055	37.0481	38.042	37.652	36.8803	36.9026	36.4768	37.3282	37.7589	36.3762	36.4918	36.1888	36.9306	35.6676	35.2721	35.5977	34.8395	35.6798	35.8016	36.5479	36.637	37.5146	37.8226	38.6987	39.8002	41.1364	42.6621	42.7806	43.3827	45.1325	46.6715	47.2473	48.628	49.9157	51.7363	52.4598	53.7086	55.012	56.539	58.4836	59.2494
	28.5307	27.9149	27.6009	25.5698	26.8056	27.0128	25.9665	25.6229	25.9746	26.2003	26.019	26.0616	25.5756	24.8974	25.5761	24.6792	25.0495	24.3325	24.0951	24.4109	24.6608	24.1028	23.3173	23.8376	23.4412	24.3401	24.9364	24.3335	24.5441	25.6656	25.7771	26.58	27.856	28.3643	28.8496	29.4928	29.6699	31.1007	32.4703	33.1611	34.5299	34.8184	36.4152	37.058	38.3948	39.2504	40.534	41.9917	42.5377
	51.8596	51.3592	51.0623	50.5101	51.3109	51.6521	50.8535	50.0516	50.506	51.016	51.4035	51.7908	51.0003	51.1393	50.83	51.0267	51.0134	50.6252	50.6832	51.0814	51.6877	51.6925	49.9984	51.6295	50.7893	53.8223	55.3245	55.3615	55.5953	57.5509	58.3267	59.9498	62.095	63.1603	64.817	66.2935	67.1857	69.5431	71.39	72.5325	74.1837	76.0492	77.5338	79.733	80.3277	81.1345	83.6315	86.078	87.4422
	19.9329	19.9675	19.4414	17.3953	20.0161	19.5688	19.6036	19.3588	18.9153	19.3811	19.8466	19.7318	19.5874	19.4936	19.657	19.8452	19.5788	19.1854	19.1312	19.0747	19.9644	19.1317	19.0578	19.3591	19.7817	22.0821	22.2389	23.1379	23.514	24.2989	25.002	26.5643	27.6081	28.8366	30.1743	31.263	32.127	33.4308	35.3882	36.9928	37.4234	38.9784	40.5708	41.8787	43.3964	44.1036	46.2819	48.1405	50.0188
	36.2382	35.9229	36.1897	35.2915	36.1945	36.6241	35.8018	35.6216	36.1034	36.5774	36.6671	35.9368	35.9277	35.7041	36.2091	35.5029	35.861	35.8861	35.8141	35.8415	36.6251	35.5674	35.6251	36.1514	35.4666	37.5941	37.982	38.8597	39.1572	39.7839	41.0924	41.8098	43.4526	44.7787	46.4032	46.9377	48.4917	50.3597	52.387	53.7025	54.8221	56.6261	59.0081	60.2078	61.8553	63.108	65.3289	66.9979	68.5709
	26.9672	27.3294	26.3635	24.0545	26.5866	26.2805	26.7082	26.2497	26.0354	26.0297	26.7368	26.4213	26.2859	26.0127	26.0669	26.3386	26.5667	25.8079	25.3397	26.033	26.4829	26.4043	25.7181	26.0847	25.5589	27.4756	28.6352	29.5632	28.7788	29.7596	30.7622	32.2129	33.7372	34.8667	36.7247	37.428	38.5906	40.0603	42.4599	42.7043	44.0011	44.5156	46.774	47.8224	50.5255	50.3471	52.1649	53.1522	55.3714
	25.9774	25.6605	25.4597	24.3894	25.4834	25.8171	25.2626	24.7918	25.4397	25.8225	25.5145	25.7983	25.7691	25.5898	25.6688	25.7719	26.5126	26.1169	26.105	26.3636	26.8156	26.4312	25.7629	26.6152	26.2229	28.653	29.4134	30.2104	29.916	31.1349	31.8132	32.9973	34.2787	35.4879	36.5497	37.7729	38.5296	40.6963	42.1538	43.4213	44.7322	46.5108	47.5168	49.029	50.1283	51.4721	52.9833	54.2796	55.8893
	38.1558	38.3913	37.9092	38.1664	37.9826	37.9845	37.5743	38.0229	37.8956	37.8685	38.9905	38.8352	39.2797	38.8382	38.8466	39.3734	39.2313	39.1016	39.8166	39.9754	39.8568	39.4757	39.0659	39.4261	39.0883	40.0787	40.9561	41.871	41.3171	42.5931	43.7404	44.9081	46.404	48.082	49.5533	50.4096	52.0826	53.3089	55.4902	56.8522	57.5012	59.569	61.388	62.6043	63.4749	66.31	67.0291	68.701	70.022
	32.0903	32.1718	31.4899	31.4418	31.1835	31.2866	31.0858	30.1284	30.2613	30.2859	30.4063	30.2313	30.165	30.0416	30.2102	31.2469	30.7083	31.0061	31.3816	31.0374	32.1093	31.3032	29.9581	31.0101	31.6413	33.5149	33.5805	33.415	33.0017	34.5452	35.1536	35.6647	36.905	37.7613	38.5161	39.1105	39.8309	41.3382	42.8391	43.8545	45.6637	47.2094	49.042	49.9309	50.8548	51.8625	52.9109	54.809	56.0437
	23.6975	23.9903	23.8565	23.668	23.8723	23.6804	23.5749	22.9531	23.1096	23.9905	24.0017	23.7507	23.4545	23.093	23.8777	23.7776	23.3749	22.6048	22.8703	23.2143	23.9047	23.3328	22.6846	23.5033	23.173	24.3255	25.3795	25.6086	25.4464	25.8387	26.6685	27.8106	29.2715	30.2166	31.1186	31.7333	32.8389	33.3771	35.1255	36.3659	37.347	38.0863	38.9532	40.6243	41.8201	42.6554	43.6608	45.442	46.9889
	32.2868	32.4145	31.6871	30.8488	32.2733	31.798	31.5627	31.2851	31.503	31.5735	31.8312	31.3603	31.6376	31.4399	31.8037	31.675	31.8538	32.1012	32.0492	32.423	33.1284	33.0561	32.336	32.3922	32.4495	35.3113	35.6151	36.0633	36.2031	37.2882	37.6792	39.4578	40.1915	41.6809	42.8278	44.4361	45.0276	46.4295	48.7002	49.1279	51.315	52.2761	54.5184	55.5178	56.7413	57.4348	58.5301	59.838	62.1569
NS shRNA 8uM CPA	34.9931	33.638	34.4528	33.6309	34.5784	34.6823	34.258	34.4457	33.7819	33.7734	33.7808	33.4916	33.7706	33.7946	34.8425	34.9537	33.7388	34.0043	33.2968	33.7058	33.3994	33.5459	33.9117	33.6707	33.2908	34.737	35.5435	35.7615	36.9692	38.4043	40.2552	42.118	44.2719	46.3226	49.6902	51.3487	52.8781	55.3553	56.6606	59.2278	61.8167	64.5443	65.3634	69.9376	72.4429	74.5535	77.6413	80.8146	81.8895
	41.5908	40.7932	40.8312	41.7553	41.3064	41.1259	41.0801	44.4791	42.1064	42.396	41.742	41.2764	42.3451	42.074	42.3405	41.9708	41.7685	42.5208	42.2165	42.9491	42.2656	42.1542	42.6364	41.9838	42.1687	43.3514	43.6044	45.1935	46.96	48.3138	50.1651	53.5381	56.4535	57.6629	59.6553	62.6512	65.8807	68.1378	71.0184	73.7491	77.8733	81.2795	83.8892	87.4305	90.865	94.4093	97.4014	102.51	102.594
	11.731	11.5091	11.8955	11.4632	11.3184	11.4718	11.4527	11.5281	10.9416	11.2675	11.0053	10.0982	10.5844	10.6242	11.1501	11.044	10.5074	10.4598	10.1527	9.7073	9.98812	10.4474	11.0811	10.3576	9.94924	12.2893	13.4846	13.6556	14.9931	16.8943	17.5988	20.0632	22.189	23.5943	24.5735	28.0264	29.8523	31.5753	33.7517	36.6446	38.287	41.8293	43.5077	45.5282	48.5016	51.1507	54.0757	56.7254	59.2759
	9.70588	10.2231	10.2309	9.34148	9.61162	9.65944	9.85307	11.346	10.099	9.8399	10.091	9.3362	9.43446	10.1354	9.47884	9.68875	9.41822	9.19593	9.10205	9.49223	9.04052	10.123	10.354	10.1654	9.26588	10.8041	11.2002	12.0534	12.8618	14.3156	15.503	17.7746	19.6941	21.7917	23.5571	26.3736	28.2645	30.6341	33.181	36.5817	39.5433	42.8597	45.0109	48.2669	51.4093	54.2415	57.9841	61.1212	63.5145
	41.7455	42.3463	42.0589	41.7757	41.5281	41.5919	42.3284	43.4331	42.6391	43.1369	42.1751	41.6821	42.0443	43.0798	43.4596	43.3543	42.395	41.884	42.2915	42.6155	42.7385	41.6571	42.7242	41.8776	41.2468	43.4783	43.0183	44.5345	46.5278	47.1866	49.3273	52.1025	54.7088	56.27	57.1225	61.5954	63.983	67.5586	70.1451	73.6628	75.2715	79.1859	81.2441	85.5987	87.935	91.5041	93.2691	99.1073	100.223
	34.8457	34.9609	35.0973	34.7255	35.0539	35.2043	35.1059	38.4853	35.5191	35.4275	35.7979	35.7235	35.3207	35.4827	35.8168	35.9576	35.656	35.7991	35.6262	36.1067	36.4237	36.5378	36.3906	36.2179	36.3253	37.0454	38.3154	37.8666	38.8223	39.4912	40.3184	42.1716	43.707	44.4708	45.8222	46.7979	49.1941	50.6604	52.7404	54.9405	56.6614	59.1677	60.6413	63.386	65.6449	67.4735	68.6995	72.2135	73.1307
	41.5695	41.0164	41.0708	40.9734	41.3689	41.7828	41.818	41.3355	41.9771	41.6401	41.889	41.1998	41.0575	41.9876	42.3727	42.3504	41.9274	41.5663	41.4197	42.1669	41.1897	41.9656	41.6632	41.4156	41.1222	43.9705	44.398	44.5816	46.6101	46.6141	48.2988	50.4764	52.5668	53.9636	55.7127	57.0886	60.1709	61.9241	64.5793	66.341	69.0742	71.5919	73.559	76.0512	79.7509	82.2824	84.9032	87.8557	89.5479
	43.7404	43.941	44.358	44.33	43.2957	44.235	43.7201	41.1882	43.676	43.3833	43.4165	43.0686	42.4773	43.2595	44.1832	43.4843	42.8205	42.9783	43.2516	43.7381	43.5051	43.3149	43.2234	43.1418	42.7757	43.0759	43.9503	43.6197	44.491	45.27	46.8603	48.2238	49.8176	50.1482	51.4381	53.3529	54.9568	55.8914	58.7617	59.7029	61.0985	62.8622	64.138	66.0122	69.0427	69.6519	70.8288	73.2959	74.3304
	28.446	29.443	30.1837	30.8002	31.467	30.7418	31.3809	28.7177	29.4705	29.1584	30.4259	29.7515	29.6412	29.212	31.1937	29.9275	30.1463	30.7672	30.0235	30.8645	31.536	32.3367	32.1153	31.4985	31.5533	31.5909	32.484	33.8097	34.9513	35.1166	36.6012	38.2632	39.7833	40.7503	41.6738	42.8161	43.957	46.6252	46.8024	49.4467	49.8782	51.8851	54.6427	54.6183	56.7122	58.4861	59.5499	63.0267	63.6185
	31.9421	30.8686	31.0983	31.7377	31.2017	31.5281	31.958	31.8128	30.8317	31.7145	30.5006	31.3228	31.6443	31.948	32.0245	31.9212	31.5891	31.6989	31.372	31.5471	31.7651	31.6479	32.7067	31.3878	31.8728	33.0652	33.754	34.3718	35.3189	35.5846	37.3682	38.7872	41.3095	40.8711	42.8602	44.9824	46.6786	47.9238	50.6334	52.5317	53.9738	57.4747	59.3626	62.4092	64.3521	66.9714	68.6764	71.3365	73.0027
	33.5834	33.3286	33.6864	33.7714	33.6298	33.6809	33.7871	36.3453	34.3904	34.3811	33.6789	34.0499	34.6693	34.9058	35.5242	35.6416	35.4313	35.3071	34.9317	35.405	35.7676	35.4533	35.8036	35.5849	35.6774	38.0214	38.481	38.5305	38.8661	39.3015	39.7432	41.2328	42.8119	43.4451	44.4736	45.8739	47.1116	48.5508	49.3105	50.5921	51.8792	52.8168	53.6356	55.2803	56.8545	58.4031	60.2708	62.8934	63.4675
	38.5166	38.319	38.4992	37.9794	38.4726	38.3959	38.1902	39.3189	39.2452	39.1439	38.9759	38.523	39.3502	39.3795	39.6495	39.2115	39.6545	39.4691	38.863	39.0788	38.8816	39.2503	39.1869	39.8043	38.7549	40.6009	41.2167	42.1747	42.9675	43.7713	45.2355	47.2167	49.3432	50.3412	52.3324	54.8124	56.9255	58.6986	61.2291	63.5335	66.0856	69.4568	71.9351	75.0292	77.9289	80.3162	82.8567	85.6904	87.9483
	34.0862	33.4192	33.6009	33.4163	33.6662	33.8551	33.2045	34.1015	33.3697	33.2986	33.2803	33.3779	33.6512	33.5315	34.6434	34.5391	34.3188	33.5009	33.3475	33.6653	33.7908	33.7724	34.3834	34.2123	33.8109	36.1699	35.8523	36.4439	36.9916	38.3851	38.8358	41.4675	42.4374	44.4918	45.5221	47.1055	49.2322	50.4749	53.0031	54.2385	56.0224	57.6203	58.9518	61.526	63.1086	65.2562	67.5182	69.8622	70.5922
	41.8389	40.306	41.6849	41.6711	41.3537	41.9309	40.9996	40.3795	40.9687	42.2316	42.2101	41.2751	41.631	41.9248	41.9983	41.3886	40.1777	40.3981	41.8044	40.0715	40.1273	41.1885	41.4707	40.7617	39.9596	42.2757	43.4077	43.4507	44.2318	45.7018	46.3925	48.5438	50.9852	52.7641	53.7281	57.1834	59.1872	60.9024	63.8514	65.6037	67.8213	71.1376	73.4125	75.8883	78.9337	80.1385	82.6823	85.8968	89.126
	47.4528	46.9405	47.3706	48.7538	48.1568	47.7676	48.459	47.4589	47.9249	47.1597	47.8854	46.8279	47.2954	47.6984	47.5534	47.2532	47.4621	47.6825	46.7817	48.2731	47.553	47.7668	48.4889	46.6646	45.9733	48.2986	48.5133	49.7293	50.3683	51.3601	53.5272	56.351	57.6964	59.3637	60.8859	63.2844	66.1268	67.263	70.623	72.3438	74.6294	78.0316	80.2583	83.4599	86.0049	88.8833	90.3629	94.5663	95.3075
	38.9328	38.3212	38.4207	38.7659	38.5692	39.2751	38.9543	38.8073	38.7689	38.7997	38.8492	38.2421	39.007	38.7948	38.9907	39.288	38.7069	39.1733	38.6389	39.1496	39.2761	39.3463	39.1397	38.6603	38.5198	40.5382	41.254	41.3342	41.9583	43.4062	44.1918	46.5809	47.6588	48.67	50.789	52.575	54.4876	56.6425	57.8664	59.8471	61.7386	64.2362	65.8831	68.9084	70.5885	73.9313	75.7619	78.4212	79.6195
	47.7957	47.3453	47.7995	47.2038	48.4036	47.9057	48.0117	47.6489	46.7602	47.1168	47.1691	46.8831	46.4968	47.389	47.6748	47.4621	46.7844	47.7906	47.36	45.9491	46.9503	46.2603	46.8392	46.8849	46.5952	49.5539	50.1493	50.7779	51.525	52.4418	54.5288	56.0523	57.4969	59.2631	60.8049	62.3661	64.5485	66.5284	67.6273	69.6806	71.522	73.4008	75.7974	79.0954	80.4476	83.1051	84.6455	87.3271	88.6759
	43.3981	44.0954	43.6037	43.4846	43.6972	45.4918	44.9629	43.4414	44.1844	44.7774	43.2508	44.516	44.8412	45.2691	44.7525	45.6474	45.4296	44.4179	44.4738	44.7309	44.7772	44.8124	44.59	44.4084	43.807	46.0715	45.5526	46.9745	48.3789	49.4622	51.8686	54.6482	56.2614	58.0017	59.7993	62.3329	64.3356	66.2396	69.4219	71.9475	73.5289	77.9278	78.6277	81.662	84.056	86.7834	89.6417	92.1636	94.2089
	42.2429	42.4734	42.6263	42.2798	42.0582	42.5828	42.2674	42.4829	42.5591	42.8681	42.6108	42.8471	42.5683	42.3951	42.9789	42.5614	42.7138	42.3962	41.7216	41.8981	41.7004	42.6491	42.446	42.3972	41.7427	44.5779	45.0629	45.7659	46.7829	47.5981	49.594	51.7072	53.6299	55.0545	56.7795	59.2492	62.375	64.5529	67.1709	69.0324	71.2167	74.7095	77.2231	80.2847	83.471	86.8666	88.4666	92.7912	94.6895
	40.2177	40.8395	41.7151	41.0776	41.4847	41.7346	41.1097	43.1261	41.4805	40.7694	41.8158	41.7248	41.2202	41.8646	41.7883	41.5737	42.054	41.9435	40.6903	41.8425	40.9157	41.0865	41.7354	41.3091	40.609	42.6784	44.1785	43.9375	44.8884	45.9474	47.5599	49.0674	50.3037	52.1642	53.2103	55.4704	56.4712	58.5762	61.3707	63.251	65.0794	67.8947	68.6476	70.6784	74.2054	76.2283	77.2094	80.7196	81.3771
	50.8938	51.2006	50.751	50.842	51.2062	51.4457	51.1851	52.1045	52.2893	52.0989	51.6007	51.4097	52.3484	52.2118	52.4584	52.041	51.0241	51.3256	50.8981	50.3986	50.6135	50.2188	50.5609	49.9805	49.8309	51.3379	51.8785	51.9487	52.8223	53.3515	54.5563	56.5213	57.6904	59.638	60.5693	62.871	64.5956	66.1321	68.579	70.3453	72.314	74.7649	75.6699	78.1902	80.4034	83.3296	85.4639	88.8961	89.9382
	49.3557	48.0144	48.7548	48.7208	48.6704	48.0708	47.9695	45.7081	47.5045	47.9556	47.708	47.3911	47.5073	47.1141	48.0525	48.0192	46.8891	46.3732	46.2443	46.7177	46.3069	46.541	46.1796	46.2103	45.7437	48.8163	49.2631	50.29	50.7824	52.215	53.4515	55.7057	57.7508	59.5024	60.6374	63.0398	65.8233	68.2266	70.5758	72.081	74.5819	77.4894	78.7733	81.4649	83.2385	86.3052	87.9687	91.0878	91.962
	39.7149	39.5934	39.5505	39.2051	39.359	39.7539	39.2105	40.9543	40.0161	40.0147	39.5401	39.0903	38.6989	39.2151	39.6676	39.7062	39.5625	39.295	38.9899	39.3718	39.1499	39.0024	39.4039	38.999	38.837	39.1609	39.8668	40.7104	42.1123	42.5305	42.5902	45.6768	47.5558	49.1348	50.5455	52.3483	55.132	56.4505	58.7049	60.5359	62.2634	65.4384	66.4345	68.3012	71.501	73.3623	74.5166	78.3733	79.4983
	37.0865	36.531	37.0895	36.6804	36.7888	36.153	36.6814	34.8867	36.3043	35.5866	36.284	36.7017	36.1003	37.1893	37.2468	36.3654	36.3307	36.6425	36.6993	36.5947	36.7452	36.3777	36.8179	36.4583	36.1368	38.2159	38.6092	39.2755	39.5844	40.6428	42.0826	44.1582	45.186	46.5113	48.2137	49.915	51.8863	53.7382	56.8419	59.3502	60.403	63.157	64.3496	66.8248	68.9473	71.9016	73.2884	76.2732	77.2398
	34.8496	33.583	34.3701	34.7019	34.5004	34.9495	35.0554	37.3937	35.0864	35.6329	35.327	35.343	36.1648	36.2552	35.9073	36.3579	36.2875	36.0764	35.5024	35.7223	36.1107	36.3175	37.1444	35.9453	36.3281	38.0172	38.1747	39.5527	40.5459	41.1445	42.797	44.0537	46.5609	46.8726	48.9956	50.7267	52.5156	53.9172	56.7288	58.0814	60.0023	63.2373	65.0052	68.6059	71.0111	73.2439	76.413	79.7866	80.8424
	43.1949	42.3083	42.9503	42.3235	41.6105	42.6894	42.485	41.8378	42.5818	42.9921	42.6367	43.2188	43.3356	44.2268	44.0743	43.537	43.3009	43.9108	41.9134	42.0901	41.8506	42.4817	42.807	42.608	42.3355	42.9784	43.1555	44.0831	45.2139	45.5049	48.2249	50.1031	51.7755	52.8354	55.4548	57.6886	60.0514	61.5741	65.2175	68.8184	71.0182	75.7828	78.3488	81.079	83.2598	87.7676	88.5577	93.9701	95.2395
	22	21.401	21.1584	21.3809	21.7099	21.6337	21.9263	20.61	21.5832	21.9471	21.6931	22.102	22.2024	22.3971	23.1801	22.4195	23.0037	22.8659	22.5028	22.6575	22.5457	22.5332	22.4964	22.0568	21.7102	23.5647	24.2462	24.324	25.6791	25.747	27.5996	29.2897	30.6418	31.6615	32.776	34.519	36.6004	37.4927	39.8692	41.0355	42.6245	44.5244	46.4018	49.1391	50.7469	53.2518	54.4289	56.4063	57.2079
	44.8087	44.0169	44.397	44.7273	43.9492	44.7939	44.4785	44.7767	44.6912	44.771	44.911	44.6241	44.6171	45.255	45.8621	45.2159	44.5174	44.4876	45.3836	45.0613	44.9273	46.0215	45.7758	44.6728	45.0696	46.6223	47.6987	47.8756	49.3667	50.127	51.4999	53.6899	56.7725	58.2872	60.0386	62.9411	65.6487	67.5951	70.802	73.3699	75.3641	78.8734	82.0583	85.408	88.2832	91.9487	94.9701	98.2078	100.293
	29.8984	29.1253	28.973	28.8275	28.9401	29.1911	29.5902	29.391	29.364	29.4368	29.4716	28.855	29.8016	30.08	30.1908	30.4554	30.5633	30.8762	30.5997	30.7903	30.498	30.7799	31.3381	30.4123	30.66	32.1309	32.9718	34.0973	34.6757	36.0051	37.7164	39.6692	42.064	43.331	45.7387	47.9375	50.6232	52.5767	56.0559	58.467	61.1507	63.9282	66.7089	69.0173	72.2771	75.5549	77.6837	81.346	83.0952
	28.2382	27.7432	28.2827	27.904	27.649	28.1546	28.0303	28.2039	28.397	28.3197	27.7496	27.6691	27.8104	28.1158	28.5529	28.1206	27.9016	27.8457	27.7314	27.6445	28.4074	28.6487	28.3954	28.2087	27.6943	29.3416	30.2095	30.8948	31.7518	33.0931	33.9477	36.5431	38.8749	40.0353	41.9905	43.9777	45.8829	47.9812	50.1465	52.5279	55.1111	57.8293	59.7635	63.1951	65.6576	68.6177	70.9396	74.6123	76.2415
	32.8677	32.4514	32.4231	32.591	32.998	33.1805	32.8062	35.4236	32.8137	33.194	32.5871	33.104	33.9013	33.4708	34.3864	34.2702	34.0752	33.907	33.1976	33.1208	34.3296	34.2912	33.6229	33.6878	32.7763	37.7608	38.5289	39.1544	39.896	41.4986	42.4924	45.0401	47.2629	49.5749	51.2307	53.7899	54.8672	56.2191	59.2743	62.2086	63.2001	67.7627	69.5099	72.2978	74.9077	78.5	80.5593	83.8383	85.375
	21.1131	20.9274	21.7267	21.3616	20.6167	20.776	20.436	20.8304	20.9132	20.0912	20.278	19.7561	19.9151	20.3872	19.8864	20.0207	20.3333	20.6507	20.0302	20.1294	19.7622	19.4636	19.6119	18.8454	19.178	21.3562	21.1805	21.7862	22.2766	23.4462	23.4804	25.0408	26.4738	27.0559	28.4896	29.5171	30.827	31.55	32.6118	34.3713	34.7662	36.092	36.8993	38.692	40.2538	40.899	42.541	44.2838	44.8048
	21.5795	21.1879	21.6089	21.6974	20.7669	20.4589	19.7396	19.9742	19.612	19.7113	19.1151	19.2915	19.5426	19.611	18.5036	18.62	18.7132	18.7827	18.6883	18.6527	17.8158	17.8089	17.3827	17.9407	18.1674	19.5762	19.8511	20.3645	21.3617	21.9997	22.4855	23.8967	24.6451	25.5187	27.6874	28.3883	29.154	30.6171	31.7927	33.4339	34.8449	35.8438	38.2356	40.0244	40.8212	42.2263	43.8864	46.6699	47.2052
	29.8337	30.2678	29.2808	30.1978	29.2742	29.0728	28.9767	29.0415	28.7601	29.1767	28.634	28.2568	28.3487	27.74	27.7526	27.6236	27.7817	27.3672	26.8123	27.4052	27.255	27.3585	27.7064	27.7793	27.6554	28.5769	28.7074	28.9268	29.7976	30.494	31.1055	32.7221	34.0591	34.7158	36.2239	37.4368	38.6404	39.6563	41.0122	43.136	43.2386	45.9105	47.523	49.3397	50.5615	52.8133	54.2559	57.1084	58.3093
	25.9738	25.655	26.3853	26.3329	25.7655	25.8556	26.6479	25.4291	25.8801	26.1684	25.4444	25.1002	25.8168	25.8174	25.6725	25.8271	25.7258	25.7959	26.2345	26.168	26.2588	26.2402	26.1797	25.7113	25.3391	26.5376	26.548	27.1112	27.1859	27.8507	28.5591	29.4484	30.8187	31.7617	32.3694	33.6793	34.6464	36.0072	36.3572	38.9911	39.3746	41.0237	42.2337	44.4475	45.399	47.7455	48.4012	50.6676	52.6672
	44.3232	43.5869	43.596	43.542	42.9853	43.2083	43.5532	43.1522	43.2314	42.8051	43.0502	43.2914	43.0808	43.1671	43.0239	42.9791	43.2232	42.7943	42.7936	43.087	43.2148	43.1419	43.2981	42.6257	42.3454	44.3363	44.5715	44.9284	45.571	46.2157	47.3709	47.8289	50.0401	51.3475	52.5123	54.2267	55.074	57.0899	57.6237	60.3967	60.4963	62.2147	64.0748	65.5269	66.9721	68.8898	69.9884	72.8774	73.0647
	41.5977	41.5773	41.6566	42.0637	40.6017	40.9215	41.2756	40.5823	40.7737	40.2962	40.1024	39.8085	40.35	39.9966	40.0709	39.6394	40.2818	40.0287	39.2258	39.7063	39.8242	39.7322	39.7798	39.188	39.5142	41.4511	41.4237	41.6645	42.5308	44.486	44.2349	46.4386	47.675	49.6479	52.7364	53.4365	55.0028	57.2321	57.9835	60.8031	62.2852	63.9754	65.7302	68.564	70.4404	72.5661	73.612	77.0037	78.0561
	44.4926	44.6309	45.0334	44.352	44.7855	44.0418	44.6902	43.7602	43.4987	43.9122	42.7961	41.9518	43.186	42.6255	41.9547	42.5153	42.0508	41.1313	41.8795	41.375	41.5366	42.2903	41.7487	40.5454	40.9362	43.6696	43.7276	43.6075	44.7885	45.8935	45.8252	48.5889	50.2597	52.2293	54.8158	55.9883	58.1374	59.693	60.6295	63.8864	63.9003	65.4546	66.5728	68.8082	70.5066	72.4511	72.8958	76.4669	77.0341
	47.5171	47.4939	47.6558	47.8274	46.6691	47.0456	47.7596	48.7074	48.2677	47.7929	47.2641	46.9573	47.224	48.0525	46.668	46.8611	46.4636	46.9223	47.1566	47.7281	47.4766	46.5542	47.7103	46.3537	46.1854	45.5365	46.0607	46.8863	48.0788	48.7825	49.7899	50.776	53.3184	54.6048	56.9154	59.131	60.9021	61.7277	62.5845	65.8032	66.8254	68.3604	71.3101	74.7974	76.6069	79.6603	81.7203	84.7015	86.389
	45.0051	45.3795	44.9208	45.4101	44.6092	44.8363	44.1136	45.1828	44.6419	44.0174	44.2992	44.0728	43.728	44.432	44.4146	43.8081	43.3337	44.0251	44.6542	44.0483	43.2638	43.0226	43.5564	43.3931	42.5956	44.7597	44.5806	44.8171	45.1144	46.7103	46.4778	48.7294	49.5954	51.0965	53.0744	54.1255	54.8304	56.5202	57.3142	60.5711	60.356	61.846	63.3413	65.7159	67.415	70.2025	71.6752	74.28	76.1287
	50.7752	51.5964	51.412	51.7414	51.3642	51.0803	51.32	51.0653	52.4116	51.3508	50.8782	51.7395	52.1547	52.0226	52.3208	52.3869	52.7545	52.5533	52.8352	52.002	52.3312	52.0815	51.9346	51.8289	52.0263	52.6359	52.7062	53.375	53.8009	56.0159	56.6781	58.609	60.2208	62.9903	65.0296	66.4186	68.2503	70.1473	71.225	74.4723	74.9495	77.3694	79.2238	81.612	82.9407	86.0041	87.73	90.0716	91.3784
	24.5163	25.6013	24.8212	25.0824	24.4039	24.6894	24.8246	24.32	24.6511	24.6407	23.9673	24.2815	24.0705	24.696	23.7563	24.1116	24.2045	24.0985	24.3772	23.8555	24.1799	24.0204	23.6751	23.6638	23.365	26.2918	25.8129	26.0036	26.6875	27.7627	28.1773	29.3622	29.9363	31.0991	32.744	33.4522	34.6254	35.7129	36.7349	38.1918	38.9074	40.1533	41.2606	43.1654	44.2718	45.6455	47.5409	48.4197	49.7898
	22.7348	23.4524	23.3008	23.8174	22.674	23.1487	22.8311	22.8969	22.5772	22.4977	22.2047	22.0321	22.6386	22.1895	22.4678	22.3056	22.4205	22.1824	22.0266	21.9785	21.8557	21.8696	21.6417	21.9533	21.5803	23.0683	22.3435	22.4056	22.462	23.9036	23.3323	24.4056	24.8377	26.5181	27.7754	29.1716	29.575	31.0969	31.6651	33.8201	34.8595	36.1151	37.9784	39.9471	40.4798	42.6947	43.5952	45.4877	46.3857
	20.957	21.4277	21.3398	21.5712	21.0615	21.2818	20.8861	21.0128	21.4087	20.8337	20.847	20.8793	21.5079	20.7015	21.4835	21.026	21.5654	20.6041	21.4188	21.3018	21.1171	21.0942	21.4216	21.236	21.1434	23.0707	22.9526	23.6717	23.5458	24.6349	25.2301	26.6556	28.0041	28.5643	30.0207	31.0433	32.2416	33.1781	34.008	36.2009	37.2716	38.6706	39.5884	42.0847	43.6375	44.844	46.6671	48.9723	50.0457
	31.6361	31.823	31.7146	32.2787	31.9799	32.1109	32.2007	30.9097	31.9015	31.4511	30.7618	31.316	31.1865	31.2332	31.5682	31.3401	31.4369	31.3393	30.9642	31.5069	30.1989	30.7148	30.5209	30.7408	30.4594	32.1706	32.3413	33.25	33.2441	34.5796	35.122	36.7622	38.5515	39.7594	41.5794	42.2409	43.7661	44.6116	46.2815	48.731	49.5645	50.5636	52.8457	55.9141	57.7173	59.7401	61.7322	64.6755	66.0424
	35.8884	36.0409	36.2273	36.0196	35.8022	36.1283	36.5034	36.1986	35.9573	35.7521	35.4867	35.2326	35.4525	35.651	36.0569	35.6381	36.1924	35.7886	36.1027	35.7689	35.4984	35.0252	35.884	35.2026	34.9278	35.9909	36.3953	37.0158	37.2184	38.8031	39.5011	40.6739	42.23	44.2209	45.6323	47.1062	48.23	49.7773	51.2105	54.1282	54.844	57.1148	58.404	61.4824	62.3066	65.5179	66.5524	68.8852	70.2965
	31.1335	30.9161	31.5382	31.9379	31.3742	30.8518	31.1743	30.7205	30.8627	30.8629	30.372	30.3184	31.0558	31.2033	30.5797	31.0812	30.7678	30.8122	30.4687	31.2153	30.7629	30.396	30.6021	30.3842	29.9938	32.606	32.2886	33.2401	33.7174	34.7285	36.0486	36.7806	38.0297	39.8431	41.322	42.668	43.8884	45.9823	47.182	49.4121	50.8059	52.736	54.6604	56.6721	58.155	61.2194	62.7837	64.7531	66.2343
	26.9829	28.0092	27.7676	27.8204	27.4344	26.933	27.836	27.4887	27.8786	27.7187	27.0362	27.972	27.863	27.9393	27.8527	28.5409	28.0126	28.339	28.8758	29.6113	28.1653	28.3973	28.0031	28.22	28.0879	31.0381	30.8334	30.945	32.114	33.5464	33.3934	35.4748	36.1382	38.3818	39.063	41.0209	42.8274	43.3293	44.4231	45.7515	48.1311	49.4002	52.1737	54.4822	54.9733	57.9846	60.1239	62.8412	64.044
	31.2767	31.0008	31.2538	31.8793	31.8324	33.2656	33.9473	33.9772	34.831	34.5207	35.1318	36.196	36.5601	37.0342	37.1164	37.1892	37.9151	38.1361	38.4815	38.9918	38.5488	38.5398	38.4418	38.2598	38.5793	41.8578	41.9445	42.1258	42.9278	44.1614	44.2278	45.7657	46.8116	47.816	49.2852	50.3767	51.0799	52.5686	53.2516	54.9951	55.6539	57.658	58.6863	60.644	61.5548	63.1612	64.4471	66.9885	67.5826
	26.3836	26.7831	26.7934	26.4892	26.3811	26.4644	26.3348	26.4019	26.538	26.1122	25.4963	25.9693	25.4017	25.2435	25.3718	25.0942	25.1516	25.1666	25.3766	25.2718	24.8738	24.6762	24.4793	24.3734	23.8929	25.2432	25.5024	25.9007	26.1631	27.6938	27.8531	29.4237	29.6281	31.4706	32.1914	33.6319	34.177	35.8762	36.7138	38.3761	39.9772	41.1321	43.0934	44.8482	46.2214	48.1655	49.0208	51.0786	52.621
	37.7745	37.246	37.9873	37.6876	36.7258	37.4944	36.4563	37.0346	37.0086	37.7739	37.3224	36.9379	36.7072	37.0569	37.0239	36.5778	37.1884	36.2409	37.2351	37.5263	37.0052	36.3615	37.7611	38.0812	38.0552	40.106	39.416	40.1453	40.4924	42.1751	43.1564	43.3377	44.6707	45.8743	47.9066	48.9946	50.0655	51.4058	53.4518	55.7081	56.0552	58.1186	59.1853	62.0449	63.1685	66.258	67.6992	69.7751	71.9618
	25.0948	25.1612	25.6128	25.939	25.4873	25.2758	25.3974	25.2843	25.2038	25.1317	24.7748	25.1117	25.3222	25.5695	25.3122	25.3445	24.9845	25.0596	24.7137	24.8337	24.7544	24.3619	24.7919	24.2716	24.3769	26.5202	26.6608	26.815	27.5615	28.5373	28.5122	30.2379	31.6213	33.0857	34.6164	35.5956	37.4526	38.3311	40.1234	42.586	43.7031	45.5898	47.389	49.0892	51.2497	53.4479	55.9597	58.0423	60.0048
	19.9608	19.8366	20.5978	20.7529	20.2138	20.0404	20.2932	19.7843	20.5129	19.7787	19.9721	19.8959	19.3108	19.726	19.7813	19.7139	19.772	20.2185	20.0038	19.4387	19.5258	19.3166	19.0275	18.9367	19.1486	21.3195	21.2661	21.7475	21.7816	23.2375	23.8401	24.0304	26.665	27.5211	28.648	29.5068	30.4585	32.2317	32.5313	34.1276	35.3435	37.0779	38.7443	40.3547	41.491	43.6568	45.0633	47.1034	48.2073
	40.2953	39.8953	40.6305	40.3571	39.765	40.3682	40.4725	39.7373	40.2803	40.6902	40.3111	40.3742	40.5239	40.5499	40.4171	40.3431	40.0278	40.1456	40.2666	39.8817	39.5813	39.5092	39.5309	39.721	39.2538	40.0317	40.2078	40.5254	41.1781	41.9921	42.3621	43.2395	44.6606	46.24	47.8089	48.6947	49.436	51.4547	51.9383	54.3404	55.1149	57.2722	57.9489	60.1049	61.3571	63.3271	64.4603	66.5952	67.7481
	20.0984	20.3082	20.2271	20.3872	20.1137	19.6049	19.7573	19.6501	20.085	20.0043	19.6761	19.631	19.7192	19.2015	19.8343	19.5009	19.7978	19.8097	20.1288	19.7241	19.9389	19.4608	19.7227	18.9789	18.7756	20.674	20.625	21.2077	21.5788	22.0551	22.8576	23.8531	24.7727	26.131	27.7113	28.2664	29.1392	30.2001	30.9297	32.703	33.5218	34.6649	35.7397	37.1618	38.1472	39.9128	40.842	42.7423	44.4004
	15.1601	15.2657	15.743	15.3955	14.9489	14.8222	15.444	14.9906	15.0441	14.6711	14.467	14.7935	14.4551	14.675	14.8445	14.4551	14.8464	14.929	14.4138	14.5923	14.4453	13.992	13.9284	14.165	13.6703	15.5058	15.3133	16.1417	16.2488	17.1317	18.0826	18.5691	20.181	21.3809	22.335	23.8753	25.0654	25.9032	27.2581	28.459	29.287	30.9243	32.3831	34.1633	35.2778	36.9623	37.9226	40.286	41.8987
	37.9252	38.22	39.1502	39.1659	38.4944	39.5371	38.6137	38.0037	39.1487	38.5626	37.2825	38.0788	37.9788	38.5696	37.9505	38.0304	38.1869	38.9367	38.4648	38.4548	38.5399	39.0695	38.9412	38.9685	38.6818	40.1151	40.171	41.8382	42.0663	44.062	44.3257	46.3987	48.2425	50.2695	52.2482	54.2747	54.9207	56.8613	57.8137	60.7387	62.1294	64.9674	67.1156	70.7351	71.4544	74.2902	74.9565	78.2414	80.0483
	52.9342	53.9014	53.7109	53.4354	52.1902	53.2199	53.2365	53.0285	54.4635	53.7022	53.7411	53.45	54.1511	54.3831	55.1729	55.3499	54.959	55.3046	56.4411	56.9423	56.5802	55.9724	56.6586	56.876	56.4269	55.8646	57.4139	59.1349	59.7695	62.7381	63.1155	65.411	67.8666	69.2841	71.9005	73.5726	75.3481	76.9762	78.6479	82.3909	84.6953	86.5453	88.234	91.4405	92.1226	95.6932	97.5284	100.756	101.751
	23.145	23.1313	23.2079	23.1325	22.1656	22.6518	22.8238	22.5138	22.6035	22.2398	22.2348	21.9636	22.2142	22.2561	21.9998	22.4369	22.493	22.3965	22.8171	22.7518	22.6017	22.725	22.0043	22.035	21.4786	23.7592	23.6541	24.2289	24.4147	25.6062	26.1552	26.9353	28.6652	30.1058	31.5155	32.5821	34.2759	35.2878	36.6254	38.9044	39.7186	41.7277	43.9952	45.6724	47.4515	49.4528	51.0867	53.5802	54.9189
	28.9264	29.513	29.8696	29.3609	29.163	29.5469	28.6756	28.8205	28.6181	28.6212	28.3734	28.1778	27.7941	28.0293	28.0289	28.5973	28.5478	28.2672	28.4543	28.3021	27.8872	27.6446	27.8708	26.6667	27.1052	28.7809	29.2324	29.5879	29.9619	30.9569	30.641	32.8742	33.8759	35.6628	36.5746	38.3605	38.3937	40.9057	41.3293	43.6118	44.0046	45.3526	47.828	49.4498	50.7142	52.9177	54.4822	56.3488	57.9987
	21.7589	21.7146	22.1137	21.8477	21.3551	21.5491	21.4291	20.9519	21.0931	21.6068	21.3203	21.0668	21.3196	21.3883	21.4731	21.2222	21.4064	21.0662	21.3728	21.244	21.0101	21.3755	20.6675	21.0569	20.9783	22.0367	21.966	21.9806	21.8628	23.2743	23.4977	24.3059	25.7386	26.639	27.4271	28.7718	29.5993	30.3466	31.0248	32.5847	33.3559	34.6614	35.9542	37.3258	38.3038	40.1428	41.2773	42.9387	44.3229
	25.2997	25.451	25.8009	25.9234	25.5298	25.9721	25.7889	25.0505	25.4321	25.0731	25.1643	24.8752	25.0286	24.8297	25.2416	25.3549	24.956	25.4112	25.4209	25.5022	24.8742	25.1528	25.1437	24.4441	24.5809	27.0478	27.5491	27.8208	28.1794	30.1325	30.4929	32.3281	33.8172	35.4004	36.6306	38.0526	39.4962	41.0906	42.8239	44.7824	45.9253	48.2507	49.9475	52.3569	53.5732	56.5417	58.34	60.5786	63.3294
	42.6022	42.1613	42.956	42.3505	41.9193	42.6027	42.5758	42.3932	42.9527	42.631	42.0957	42.1815	42.3052	42.963	42.5631	42.7043	42.0663	42.0516	42.0283	42.6768	42.2806	42.2262	42.2445	42.4023	42.2582	44.4427	44.3548	45.9238	46.5409	47.5204	48.497	49.945	51.0064	52.1546	53.9295	56.544	57.9456	59.8953	61.2134	63.9475	65.1098	67.1508	68.8496	72.0796	74.2451	76.8354	78.7893	82.0598	84.1169
	39.0841	39.5803	39.8169	39.9527	39.4915	39.7819	40.1538	39.5652	39.95	40.1992	39.952	39.9999	39.7764	39.835	39.4645	39.2932	39.2473	39.5921	39.8745	39.6713	39.1758	39.4281	39.2983	38.9714	38.6046	41.3002	41.876	42.2513	43.6303	44.984	45.5158	47.2484	48.787	50.6157	52.2519	53.7517	55.0443	56.9083	58.1702	60.826	62.0451	64.0786	65.4002	69.0678	70.0609	72.8196	74.7346	77.8778	79.3063
Time (s)	0	2	4	6	8	10	12	14	16	18	20	22	24	26	28	30	32	34	36	38	40	42	44	46	48	50	52	54	56	58	60	62	64	66	68	70	72	74	76	78	80	82	84	86	88	90	92	94	96
[truncated: 227 more columns]
