# Supplementary material for: Regulation of store-operated Ca2+ entry by IP3 receptors independent of their ability to release Ca2+
Source: eLife journal article supplement (doi:10.7554/elife.80447), 2023-07-19
Supplement: fig3-figsupp1-data1 [file Figure 3- figure supplement 1_source data 2.pdf › Figure 3- figure supplement 1 source data/Figure 3- figure supplement 1_source data 2.pdf]

IP<sub>3</sub>R1 Western blotting (Panel A and B)

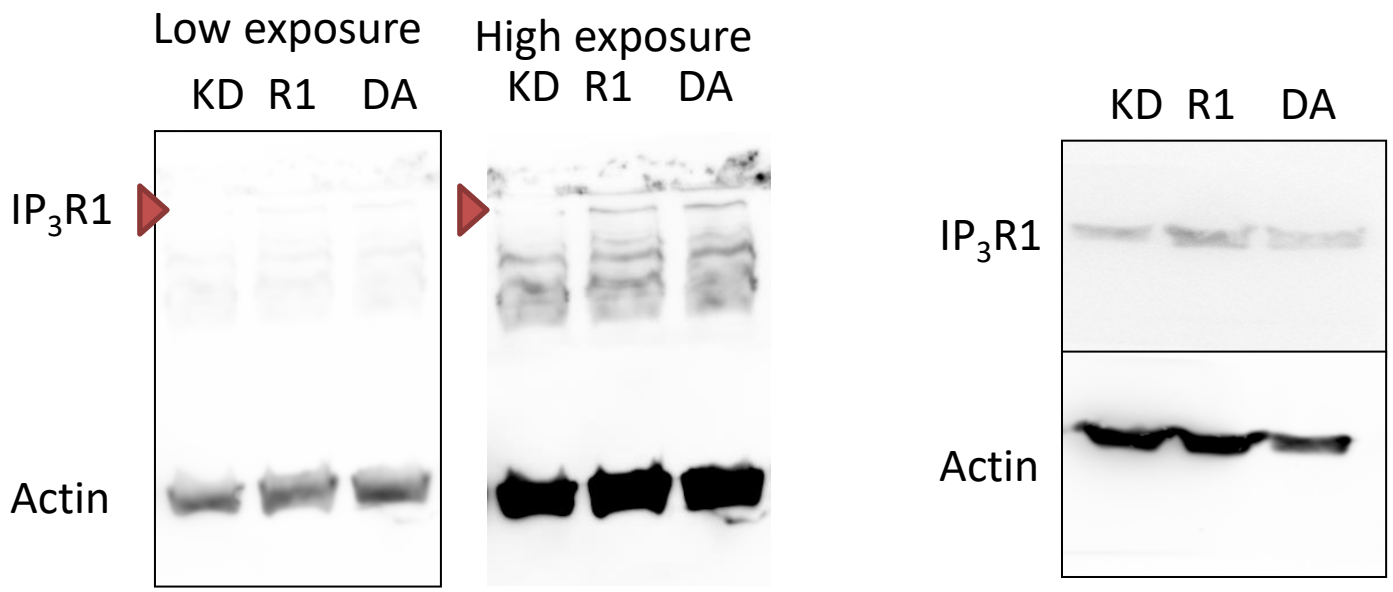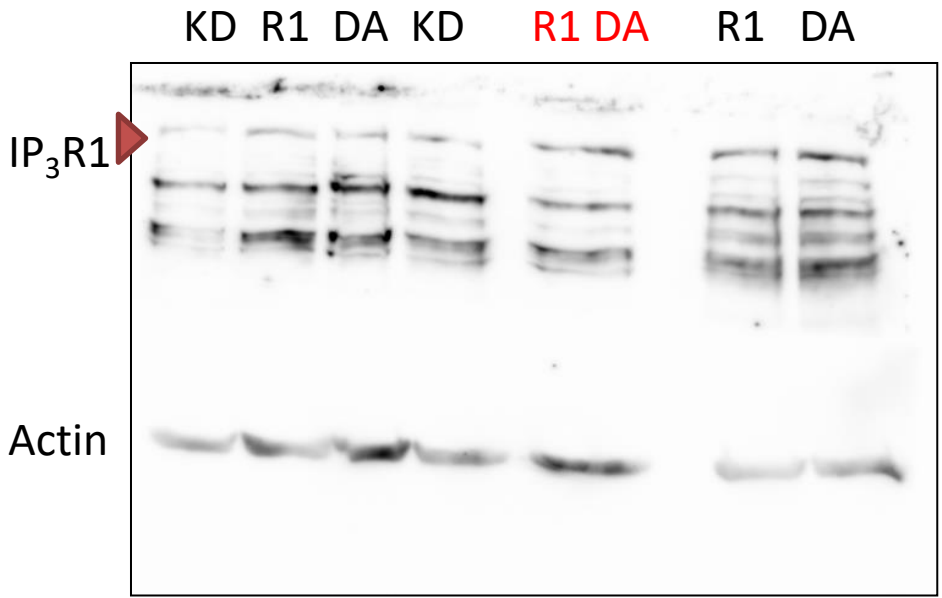

KD-IP<sub>3</sub>R1 shRNA  
R1-IP<sub>3</sub>R1 shRNA+IP<sub>3</sub>R1  
DA-IP<sub>3</sub>R1  
shRNA+IP<sub>3</sub>R1<sup>DA</sup>  
  
Each KD/R1/DA  
indicates individual  
biological replicates

Red labeled (**RA DA**) lanes were excluded as the gel lanes were merged

Orai1 Western blotting (Panel F and G)

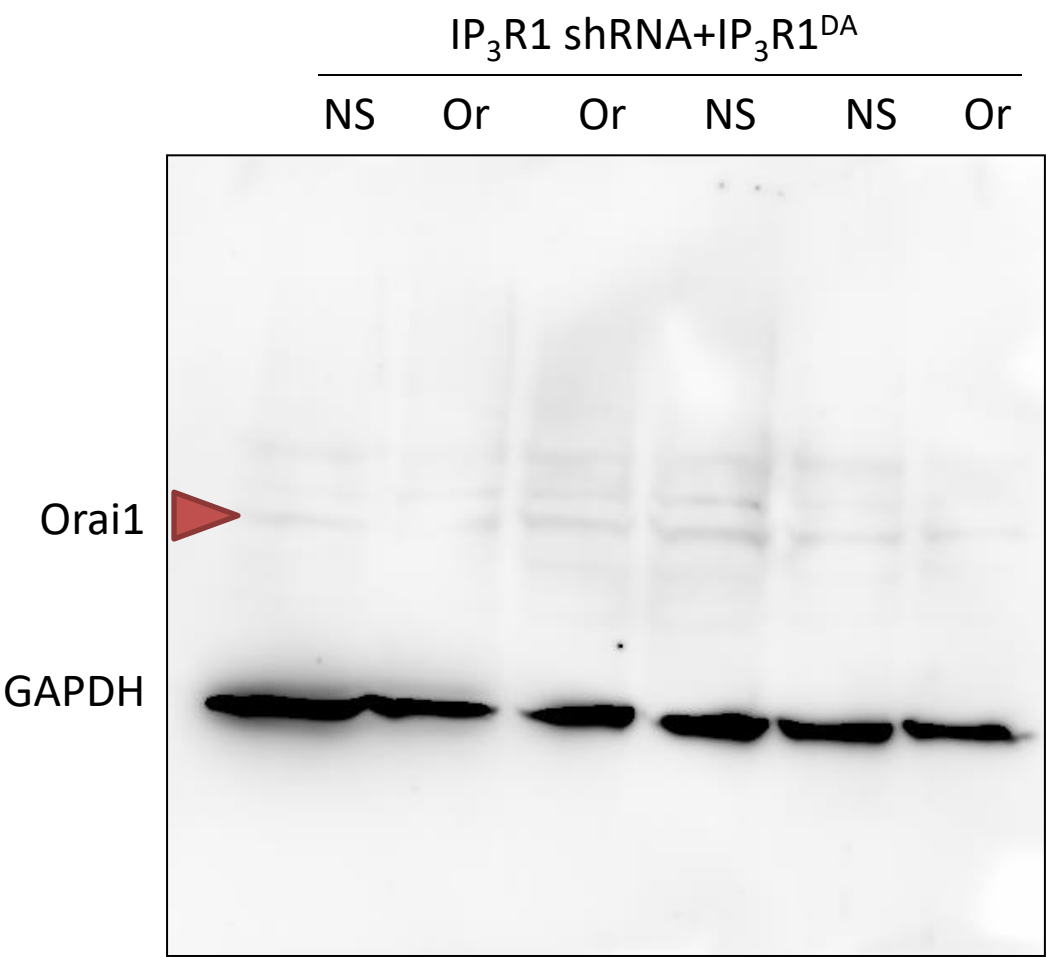

NS- siControl  
Or- siOrai1  
Each NS/Or indicates individual biological replicates

IP<sub>3</sub>R1 Western blotting (Panel I)

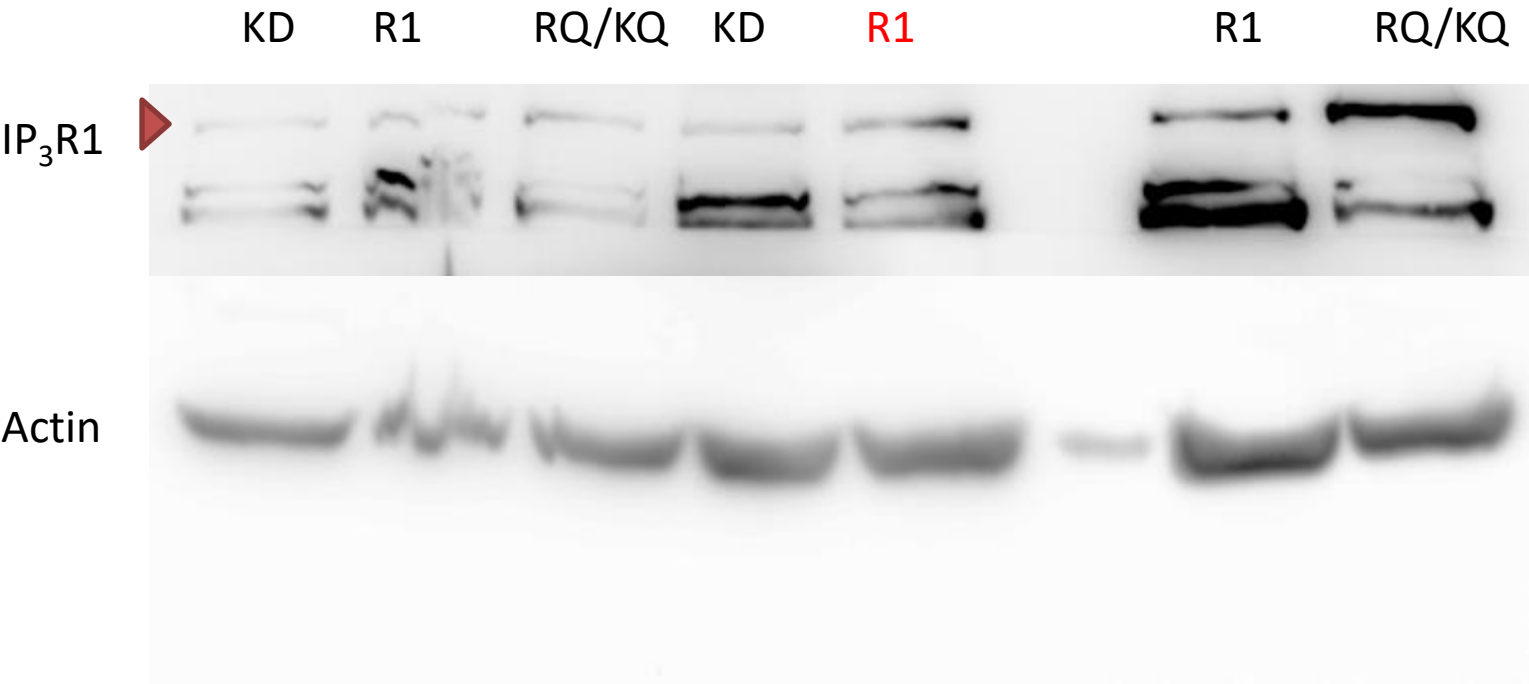

KD-IP<sub>3</sub>R1 shRNA  
R1-IP<sub>3</sub>R1 shRNA+IP<sub>3</sub>R1  
RQ/KQ-IP<sub>3</sub>R1 shRNA+IP<sub>3</sub>R1<sup>RQ/KQ</sup>  
Each NS/R1 or RQ/KQ indicates each biological replicates

Red labeled (RA) lane was excluded as the gel lane was leaked
