# Supplementary material for: Regulation of store-operated Ca2+ entry by IP3 receptors independent of their ability to release Ca2+
Source: eLife journal article supplement (doi:10.7554/elife.80447), 2023-07-19
Supplement: fig5-data1 [file Figure 5 source data 1.xlsx]

## Sheet: Figure 5A
Surface Area
-Tg	+Tg
8	13
26	68
1	86
2	27
6	91
1	159
14	65
6	6
35	42
40	37
3	164
2	94
1	23
31	60
8	77
1	96
26	3
7	110
9	34
38	72
35	91
35	89
82	3
9	67
1	112
1	16
1	149
1	68
1	275
4	39
10	3
70	141
1	10
56	9
13	61
1	83
28	123
32	131
1	103
106	65
61	3
1	84
27	72
2	5
1	3
2	--
1	--
6	--
28	--
1	--
61	--
28	--
8	--
34	--
4	--
1	--
1	--
14	--
8	--
1	--
8	--
4	--
4	--
1	--
1	--
4	--
46	--
	--
	--
	--
	--
	--
	--
	--
	--
	--
	--
	--
	--
	--
	--
	--
	--
	--
	--
	--
	--
	--
	--
	--
	--
	--
	--
	--
	--
	--
	--
	--
	--
	--

## Sheet: Figure 5B
Surface Area
-Tg	+Tg
20	11
8	34
1	20
27	39
25	23
1	22
15	68
11	16
14	1
17	23
21	1
22	79
12	19
10	28
6	27
15	9
10	12
19	29
19	2
6	65
4	1
6	45
17	57
2	29
1	16
29	11
1	5
1	1
22	2
25	1
12	24
1	9
33	6
24	18
3	33
1	13
1	30
31	14
14	15
20	15
7	14
1	2
1	1
25	92
18	11
1	1
28	3
10	1
3	31
5	46
21	8
19	58
9	43
8	2
12	1
12	12
12	20
8	1
	31
	19
	9
	1
	1
	1
	18
	80
	25
	16
	12
	26
	5
	25
	8
	1
	18
	2
	64
	10
	19
	34
	24
	6
	2
	1
	9
	35
	32
	8
	24
	10
	1
	55
	2
	22
	1
	5
	21
	1
	4
	3
	19
	1
	54
	28
	24
	21
	24
	20
	1
	1
	1
	11
	13
	6
	27
	44
	17
	4
	5
	1
	1
	1
	1

## Sheet: Figure 5C
Surface Area
-Tg	+Tg
16	24
19	36
12	32
17	32
14	15
17	30
10	33
14	31
17	26
19	38
13	8
15	15
19	21
18	37
18	38
10	39
16	60
41	16
20	16
12	36
16	39
18	91
20	32
14	47
15	12
8	20
12	45
13	57
13	76
30	5
16	56
12	26
11	60
15	19
16	15
16	51
36	8
23	39
9	118
15	108
12	25
19	61
16	68
15	59
4	56
6	123
6	61
6	70
35	30
10	58
5	43
21	40
10	17
6	280
26	40
16	27
7	30
8	8
9	7
11	61
5	138
7	36
9	114
2	28
4	41
4	29
6	41
4	13
5	9
2	16
4	90
17	36
2	40
2	77
17	33
2	26
2	9
28	19
9	109
11	7
10	56
10	19
8	55
17	64
7	26
3	13
	11
	16
	8
	14
	8
	7
	24
	12
	4
	5
	5
	5

## Sheet: Figure 5D
Surface Area
-Tg	+Tg
27	116
20	153
18	65
21	51
15	81
16	124
17	72
19	100
16	112
24	89
15	138
25	109
15	105
24	77
30	213
19	37
15	92
24	42
15	70
12	100
15	151
15	37
21	268
21	82
21	101
6	36
8	25
8	50
36	65
9	97
14	23
16	70
7	52
9	74
18	73
16	92
12	39
4	74
17	16
4	95
5	49
13	44
32	53
7	62
10	98
38	20
10	16
7	31
26	2
3	34
9	45
9	9
7	67
16	24
13	8
10	12
9	7
24	20
23	42
34	49
3	9
13	11
13	48
5	6
6	2
13	2
6	7
39
2
13
11
5
2
12
3
13
22
2
2
11
6
2
2
2
5
5
6
8
4
2
2
2
3
2

## Sheet: Figure 5E
Surface Area
-Tg	+Tg
27.312	6.475
25.25	4.622
21.182	1.34
42.821	8.524
22.071	3.748
33.917	1.414
18.6	0.577
45.094	1.443
40.273	15.424
26.929	0.5
19	4.005
29.261	11.098
40.632	4.363
26.417	4.677
33.522	11.287
46.69	9.698
21	2.565
26.842	0.577
21	0
35.238	0.5
34.821	8.572
21	5.426
37.075	2.727
14.5	1.183
38.487	7.11
17.056	11.741
25.512	6.926
36.72	1.219
37.464	0
	1.323
	8.983
	9.344
	0
