# Supplementary material for: Regulation of store-operated Ca2+ entry by IP3 receptors independent of their ability to release Ca2+
Source: eLife journal article supplement (doi:10.7554/elife.80447), 2023-07-19
Supplement: fig6-data1 [file Figure 6.xlsx]

## Sheet: Panel A
IP3R1	0MIN								4 MIN								7 MIN
	CELL 1				CELL 2				CELL 1				CELL 2				CELL 1				CELL 2
	DISTANCE (PIXELS)	IP3R1	STIM1		DISTANCE (PIXELS)	IP3R1	STIM1		DISTANCE (PIXELS)	IP3R1	STIM1		DISTANCE (PIXELS)	IP3R1	STIM1		DISTANCE (PIXELS)	IP3R1	STIM1		DISTANCE (PIXELS)	IP3R1	STIM1
	0	0.41667	0.69444		0	0.55556	0.2222		0	0.55556	0.2222		0	1	1		0	2.5556	0.9444		0	4.4722	7.0278
	1	0.38889	1.11111		1	0.33333	0.2222		1	0.33333	0.2222		1	2.2222	2.2222		1	0	0		1	4.4722	12.1667
	2	0.33333	1.11111		2	1	1.7778		2	1	1.7778		2	3.1111	2.3333		2	0	3.5278		2	7.6667	13.4444
	3	0.47222	0.63889		3	0.88889	2.1111		3	0.88889	2.1111		3	1.7778	1.8889		3	2.5556	7.0556		3	10.2222	7.9722
	4	0.55556	0.63889		4	0.77778	0.8889		4	0.77778	0.8889		4	1.1111	1.3333		4	1.9167	3.8333		4	7.6667	2.8611
	5	0.44444	0.63889		5	0.44444	0.4444		5	0.44444	0.4444		5	1.3333	1		5	1.2778	0.3056		5	1.9167	0.3056
	6	0.63889	1.41667		6	0.66667	0.3333		6	0.66667	0.3333		6	2.8889	2.5		6	0	0		6	7.0278	3.1389
	7	1.16667	2.91667		7	0.88889	2.4444		7	0.88889	2.4444		7	5.4444	7.4167		7	4.4722	6.3333		7	6.3889	13.75
	8	1.47222	3.75		8	1	5.1944		8	1	5.1944		8	7.4722	15.75		8	8.3056	18.9722		8	6.3889	16.6111
	9	1.55556	3.11111		9	1.11111	3.9444		9	1.11111	3.9444		9	8	14.6667		9	7.0278	10.5556		9	10.8611	15
	10	1.52778	1.69444		10	0.66667	1.6667		10	0.66667	1.6667		10	6.1111	6.7778		10	1.2778	0		10	14.0556	12.0833
	11	1.11111	0.27778		11	0.55556	0		11	0.55556	0		11	2.3333	2.6667		11	0	0		11	13.4167	7.0278
	12	0.88889	0.86111		12	1.11111	0.7778		12	1.11111	0.7778		12	1.5556	2.2222		12	0	0.3056		12	6.3889	8.0278
	13	0.80556	2.22222		13	2.11111	6.0833		13	2.11111	6.0833		13	1.4444	5.3056		13	0.6389	6.1111		13	7.6667	21.25
	14	0.94444	2.44444		14	2.33333	11.5278		14	2.33333	11.5278		14	2.4444	3.6111		14	0.6389	28.6389		14	9.5833	25.6944
	15	0.83333	1.05556		15	3	13.4722		15	3	13.4722		15	3.3333	2.6944		15	7.0278	51.7778		15	13.4167	17.0278
	16	0.83333	0.77778		16	3.22222	12.0833		16	3.22222	12.0833		16	5.0278	7.3333		16	14.0556	53.0278		16	17.25	12.5278
	17	1.91667	2.13889		17	3	12.4722		17	3	12.4722		17	7.8333	16.9722		17	13.4167	49.7778		17	13.4167	11.5556
	18	2.38889	4.05556		18	2.66667	9.7778		18	2.66667	9.7778		18	9.0278	21.5833		18	12.7778	32.0556		18	13.4167	20.5278
	19	2.41667	4.55556		19	2	3.8056		19	2	3.8056		19	8.6944	18		19	7.0278	8.6389		19	10.8611	24.6944
	20	2.52778	3.05556		20	1.66667	1.1111		20	1.66667	1.1111		20	6.4722	7.5		20	1.2778	7.9444		20	10.8611	6.3889
	21	1.86111	1.44444		21	2.66667	3.3333		21	2.66667	3.3333		21	4.2222	3.1111		21	2.5556	13.4167		21	6.3889	0
	22	1.19444	1.63889		22	2.11111	8.0278		22	2.11111	8.0278		22	1.8889	5.1667		22	5.75	30.2222		22	4.4722	6.4444
	23	0.66667	1.5		23	1.22222	8.8056		23	1.22222	8.8056		23	2.7778	8.8611		23	6.3889	33.4444		23	11.5	30.6111
	24	0.55556	1.55556		24	0.44444	8.0556		24	0.44444	8.0556		24	5.5	14.0278		24	6.3889	21.5833		24	13.4444	44.4167
	25	0.72222	3.88889		25	0.33333	8.0556		25	0.33333	8.0556		25	6.75	20.25		25	3.1944	18.6111		25	17.3333	49.1667
	26	1.52778	4.16667		26	1.33333	9.2222		26	1.33333	9.2222		26	7.5	19.0278		26	1.9167	20.5278		26	22.4167	41.1111
	27	1.63889	2.27778		27	4.33333	16.6111		27	4.33333	16.6111		27	5.6111	8.7222		27	8.9444	43.3333		27	16.6667	24.3333
	28	1.36111	1.36111		28	6.33333	20.25		28	6.33333	20.25		28	3.6667	4.6111		28	19.1667	55.5833		28	10.8889	17.6667
	29	1.75	2.41667		29	5.22222	12.6667		29	5.22222	12.6667		29	3.4444	5.9444		29	14.0556	38.5833		29	12.8056	17.9167
	30	2.58333	3.80556		30	2.77778	5.25		30	2.77778	5.25		30	5.6944	12.2222		30	7.6667	7.3333		30	12.1389	16
	31	2.5	3.61111		31	1.88889	5.4167		31	1.88889	5.4167		31	8.5	16.5278		31	1.9167	10.8611		31	12.1389	14.4167
	32	1.38889	2.63889		32	2.33333	9.2222		32	2.33333	9.2222		32	8.8333	19.7222		32	5.75	20.5278		32	14.6944	25.4444
	33	1.02778	3.22222		33	2	10.8056		33	2	10.8056		33	9	23.0556		33	7.0278	21.4444		33	19.8889	36
	34	1.22222	3.86111		34	1.55556	6.7222		34	1.55556	6.7222		34	8.0556	24.2778		34	7.6667	30.25		34	23.1111	44.7222
	35	0.86111	2.58333		35	2.77778	5.8611		35	2.77778	5.8611		35	6.5	20.9167		35	8.3056	33.4444		35	19.2222	44.3333
	36	0.27778	0.44444		36	4.88889	10.0278		36	4.88889	10.0278		36	6.25	15.4722		36	11.5	39.8611		36	14.1389	30.9167
	37	0.75	1.83333		37	5.88889	15.0278		37	5.88889	15.0278		37	5.6111	9.0556		37	16.6111	48.6111		37	8.9722	16.3889
	38	1.61111	3.11111		38	5	18.9722		38	5	18.9722		38	2.2222	3.6111		38	13.4167	45.6111		38	5.75	6.75
	39	1.97222	3.27778		39	3.88889	13.3611		39	3.88889	13.3611		39	2.2222	3.7222		39	7.0278	36.0833		39	7.6667	17.6667
	40	2.38889	4.19444		40	3	7.6111		40	3	7.6111		40	3.4444	11.0833		40	8.3056	22.8333		40	17.2778	34.0833
	41	2.66667	4.25		41	3.66667	10.5833		41	3.66667	10.5833		41	6.8333	21.7222		41	8.3056	17.6389		41	18.5833	39.5
	42	1.97222	2.41667		42	3.33333	12.0278		42	3.33333	12.0278		42	8.4167	20		42	10.2222	30.1667		42	16.6944	26.0278
	43	0.88889	3.19444		43	1.88889	9.5		43	1.88889	9.5		43	4.7778	9.75		43	11.5	30.1944		43	11.5556	18.9444
	44	0.86111	4.22222		44	2.33333	6.5556		44	2.33333	6.5556		44	1.4444	11.6944		44	9.5833	29.1667		44	8.3333	23.8056
	45	1.22222	4.41667		45	3.77778	7.6111		45	3.77778	7.6111		45	4.8889	22.75		45	8.3056	35.0556		45	22.4722	33.0833
	46	3.16667	5		46	3.77778	9		46	3.77778	9		46	9.7778	32.0833		46	10.2222	25.8611		46	43	59.8611
	47	3.83333	4.55556		47	2.11111	7.0833		47	2.11111	7.0833		47	9.9167	27.25		47	7.0278	17		47	50.1111	68.4722
	48	3.13889	3.33333		48	2.33333	7.4167		48	2.33333	7.4167		48	7.25	14.8056		48	7.0278	15.7222		48	30.8056	27.9444
	49	2.61111	4.69444		49	4.36111	10.3611		49	4.36111	10.3611		49	7	12.6111		49	9.5833	18.9444		49	14.0556	9.9167
	50	2.55556	6.72222		50	5.27778	10.75		50	5.27778	10.75		50	7.9444	17.6944		50	16.0278	22.3889		50	16.7222	31.4722
	51	2.30556	6.47222		51	5	11		51	5	11		51	8.3889	25.2222		51	15.9722	20.1111		51	25.6944	59.1944
	52	1.22222	3.16667		52	3.88889	10.1389		52	3.88889	10.1389		52	11.4167	24.7222		52	10.2222	23.1389		52	30.1667	69.1944
	53	0.77778	2.02778		53	4.55556	10.3611		53	4.55556	10.3611		53	7.8333	10.9722		53	6.3889	19.2778		53	36.6111	37.9722
	54	1.52778	2.55556		54	4.44444	9.3333		54	4.44444	9.3333		54	4.5556	8.0278		54	5.1111	12.75		54	29.5278	25.4167
	55	1.30556	3.55556		55	2	6.9167		55	2	6.9167		55	3.4722	13.8056		55	8.9444	17.6389		55	27.6111	28.6389
	56	0.88889	2.97222		56	0.66667	7.6389		56	0.66667	7.6389		56	4.6944	20.3889		56	9.5833	28.1944		56	25.1111	38.3333
	57	1.44444	3		57	2	12.0556		57	2	12.0556		57	5.2778	17.8611		57	15.9722	36		57	21.2222	32.8056
	58	2.25	4.16667		58	5.77778	14.5556		58	5.77778	14.5556		58	6.1944	14.3056		58	20.4444	38.1389		58	13.4444	35.75
	59	3	5.19444		59	6	11.6389		59	6	11.6389		59	11.2222	21.2222		59	15.3333	25.9444		59	23.7222	48.1944
	60	3.38889	8.02778		60	4.44444	7.3611		60	4.44444	7.3611		60	15.25	35.6389		60	10.8611	10.8333		60	40.5	73
	61	3.97222	7.75		61	4.66667	5.8333		61	4.66667	5.8333		61	15.6389	38.75		61	6.3889	7.9722		61	55.2778	89.1944
	62	4.11111	6.41667		62	3.88889	6.7222		62	3.88889	6.7222		62	14.2222	33.5		62	10.2222	13.4167		62	56.6389	87.5556
	63	4.36111	7		63	2.44444	5.7222		63	2.44444	5.7222		63	13.6389	29.9167		63	15.3333	19.8611		63	46.9167	70.1667
	64	4.69444	7.13889		64	4.22222	6.2778		64	4.22222	6.2778		64	14.7778	30.1667		64	12.7778	20.2222		64	41.1111	64.7222
	65	3.83333	4.75		65	4.66667	9		65	4.66667	9		65	12.1389	24.7222		65	7.6667	19.4444		65	38.5278	52.4722
	66	1.91667	2.77778		66	4.33333	7.3889		66	4.33333	7.3889		66	9.5556	18.5556		66	5.75	17.2778		66	34.6389	37.9444
	67	0.63889	2.13889		67	3.33333	6.9444		67	3.33333	6.9444		67	7.5556	14.6389		67	5.1111	20.5		67	26.3333	24.0833
	68	0.77778	2		68	3.11111	9.25		68	3.11111	9.25		68	7.4722	9.7222		68	8.3056	14.9722		68	17.2778	25.3889
	69	1.63889	1.27778		69	2.11111	5.4167		69	2.11111	5.4167		69	8.3333	9.1667		69	7.0278	6.3889		69	21.1667	31.1389
	70	2.91667	2.5		70	2.44444	6.1111		70	2.44444	6.1111		70	10.5556	12.6111		70	4.4722	4.4444		70	24.3889	33.1389
	71	4.08333	4.61111		71	3.55556	12.1667		71	3.55556	12.1667		71	14.9167	18.7778		71	9.5833	20.6111		71	26.9167	36.0278
	72	4.5	3.66667		72	5.58333	17.8611		72	5.58333	17.8611		72	13.6667	21.0833		72	16.6667	40.4444		72	26.9167	37.6389
	73	3.19444	1.61111		73	5.66667	16.5278		73	5.66667	16.5278		73	7.4444	9.9444		73	17.2778	38.8333		73	24.3611	24.4444
	74	1.75	1.75		74	3.66667	9.9722		74	3.66667	9.9722		74	6.1389	6.8611		74	15.3333	25		74	19.1667	9.25
	75	1.44444	2.41667		75	3.11111	8.9722		75	3.11111	8.9722		75	7.6389	12.5278		75	14.0556	17.1944		75	16.0278	27.6944
	76	1.66667	2.36111		76	4.44444	10.8056		76	4.44444	10.8056		76	8.6667	16.9167		76	17.8889	15.6389		76	17.3333	51.7778
	77	0.97222	1.77778		77	4.66667	11.5556		77	4.66667	11.5556		77	9.3611	19.2222		77	20.4444	21.4444		77	17.3056	51.4722
	78	0.41667	1.91667		78	6.55556	10.5556		78	6.55556	10.5556		78	8.1389	11.5556		78	16.6111	31.1389		78	20.5556	37.0556
	79	3.47222	4.36111		79	6.55556	9.2222		79	6.55556	9.2222		79	7.3056	9.9167		79	15.3333	24.6667		79	25.6944	22.1389
	80	5.80556	3.77778		80	4.22222	11.6111		80	4.22222	11.6111		80	14.5278	16.6667		80	6.3889	17.5556		80	39.8889	42.1667
	81	4.30556	2.86111		81	4.33333	16.8333		81	4.33333	16.8333		81	16.4167	21.2222		81	5.1111	19.1667		81	39.8333	44.6111
	82	2.5	4.27778		82	7.38889	15.5556		82	7.38889	15.5556		82	16.2778	26.2778		82	7.0278	20.8333		82	30.7222	25.0278
	83	3.19444	5.72222		83	8.61111	11.4167		83	8.61111	11.4167		83	16.1111	28.5833		83	14.7222	22.3333		83	28.2222	16.9167
	84	2.83333	5.11111		84	8.02778	14.6389		84	8.02778	14.6389		84	13.8889	24.6944		84	24.3056	26.25		84	26.9722	35.9722
	85	2.19444	2.41667		85	8	16.6944		85	8	16.6944		85	12.0833	16.25		85	24.9722	31.1389		85	30.1944	42.75
	86	2.38889	1.80556		86	8.66667	15.2778		86	8.66667	15.2778		86	9.5	8.4167		86	21.0833	34.0278		86	33.4167	28.6667
	87	2.88889	3.25		87	7.36111	14.8889		87	7.36111	14.8889		87	6.3889	3.1667		87	19.1667	24.4167		87	23.1389	17.9722
	88	4.5	4.44444		88	6.11111	12.1667		88	6.11111	12.1667		88	5.6111	10.5		88	17.8889	15.6667		88	16.6667	12.8056
	89	4.25	2.94444		89	5	8.1944		89	5	8.1944		89	7.5	18.3611		89	23.6389	16.3056		89	24.3889	18.2778
	90	3.02778	2.25		90	7.11111	9.4167		90	7.11111	9.4167		90	6.9444	11.7778		90	27.5	21.3889		90	25.6944	23.3889
	91	1.94444	3.88889		91	8.94444	13.75		91	8.94444	13.75		91	6.5	13.3889		91	23.0278	17.2222		91	30.7778	31.4722
	92	1.5	5.33333		92	8.16667	13.1667		92	8.16667	13.1667		92	9	19.75		92	18.5556	11.1111		92	44.4444	46.3611
	93	1.66667	4.44444		93	5.22222	11.7778		93	5.22222	11.7778		93	11.6111	24.4167		93	14.0556	15.9722		93	52.0833	62.4167
	94	1.61111	2.16667		94	4.11111	12.9444		94	4.11111	12.9444		94	13.4167	23.1667		94	12.7778	26.6389		94	47.6111	57.9167
	95	1.80556	1.41667		95	4.11111	12.5833		95	4.11111	12.5833		95	12.3889	14.9722		95	12.1389	20.1667		95	39.8889	39.5278
	96	1.91667	2.22222		96	3.33333	8.6944		96	3.33333	8.6944		96	10.8611	11.9167		96	6.3889	12.1944		96	28.2778	25.6944
	97	2.44444	2.94444		97	2.88889	4.8333		97	2.88889	4.8333		97	11.5	19.7222		97	5.1111	6.6667		97	16.0278	20.5833
	98	3.80556	3.94444		98	3	4.4444		98	3	4.4444		98	12.5833	21.3889		98	6.3889	10.2222		98	20.5	20.25
	99	4.75	4.33333		99	2.55556	3.9444		99	2.55556	3.9444		99	11.1389	17.3889		99	10.2222	15.8056		99	28.2222	28.6111
	100	3.86111	4.72222		100	1.88889	1.4444		100	1.88889	1.4444		100	8.9722	13.8056		100	12.7778	10.8611		100	32.1111	30.8889
	101	2.08333	3.33333		101	2.55556	2.9167		101	2.55556	2.9167		101	7.75	12.5833		101	8.3056	6.3611		101	30.8611	30.1944
	102	1.47222	2.16667		102	3.11111	7.0556		102	3.11111	7.0556		102	7.9722	9.0278		102	9.5833	4.4722		102	24.3611	24.3611
	103	1.94444	1.27778		103	3.55556	6.3889		103	3.55556	6.3889		103	9.5556	8.1389		103	14.0833	6.0278		103	27.5833	18.8889
	104	2.47222	0.55556		104	3.33333	3.8056		104	3.33333	3.8056		104	10.4167	5.7222		104	14.75	3.4722		104	28.1667	17.8333
	105	2.66667	0.55556		105	3.88889	2.8889		105	3.88889	2.8889		105	9.3889	9.1667		105	10.2222	0.3056		105	30.0833	19.25
	106	2.22222	0.63889		106	4.22222	3.8889		106	4.22222	3.8889		106	11.5556	12.0556		106	15.3333	8.25		106	28.25	15.7222
	107	1.66667	0.27778		107	4.88889	4.3333		107	4.88889	4.3333		107	10.5278	6.4444		107	14.6944	10.8333		107	19.2778	8.9444
	108	1.33333	0.27778		108	5.66667	4.9167		108	5.66667	4.9167		108	6.6944	2.1111		108	5.1111	7.3333		108	8.9722	3.4722
	109	2.16667	1.52778		109	3.66667	3.6667		109	3.66667	3.6667		109	6.9444	5.3611		109	1.2778	3.1667		109	6.3889	1.5833
	110	3.75	3.58333		110	1.66667	1.2222		110	1.66667	1.2222		110	10.1111	9.6389		110	2.5556	0.3056		110	14.1389	9.8889
	111	4.91667	3.83333		111	1.22222	0.5556		111	1.22222	0.5556		111	13	8.6389		111	3.1944	0.3056		111	35.9722	21.1389
	112	4.08333	2.69444		112	1.77778	0.3333		112	1.77778	0.3333		112	13.6667	6.7222		112	5.1111	2.5278		112	52.0556	23.0278
	113	2.88889	1.52778		113	1.22222	0		113	1.22222	0		113	12.3611	7		113	10.2222	3.1944		113	37.8611	25.7222

## Sheet: Panel B
IP3R1 RQ/KQ
	0MIN								4 MIN								4 MIN
	CELL 1				CELL 2				CELL 1				CELL 2				CELL 1				CELL 2
	DISTANCE (PIXELS)	IP3R1 RQ/KQ	STIM1		DISTANCE (PIXELS)	IP3R1 RQ/KQ	STIM1		DISTANCE (PIXELS)	IP3R1 RQ/KQ	STIM1		DISTANCE (PIXELS)	IP3R1 RQ/KQ	STIM1		DISTANCE (PIXELS)	IP3R1 RQ/KQ	STIM1		DISTANCE (PIXELS)	IP3R1 RQ/KQ	STIM1
	1	0.14706	0.02941		1	0.69444	1.27778		1	0	0.05882		1	0.27778	0.11111		1	0	0.02941		1	0.05556	0
	2	0.29412	0.05882		2	0.5	0.75		2	0	0		2	0.19444	0.22222		2	0.08824	0.05882		2	0	0
	3	0.38235	0.02941		3	0.44444	0.22222		3	0	0		3	0.36111	0.58333		3	0.29412	0.02941		3	0.08333	0
	4	0.44118	0.02941		4	0.94444	0.11111		4	0	0.02941		4	0.72222	0.69444		4	0.11765	0.14706		4	0.72222	0.11111
	5	0.44118	0.41176		5	1.25	0.44444		5	0.11765	0.02941		5	0.86111	0.30556		5	0.17647	0.29412		5	1.52778	0.38889
	6	0.52941	0.73529		6	1.44444	1.63889		6	0.29412	0.29412		6	1.02778	0.86111		6	0.17647	0.41176		6	1.75	1.27778
	7	0.52941	0.88235		7	1.61111	1.83333		7	0.5	0.88235		7	1.05556	2.80556		7	0.26471	0.58824		7	1.58333	2.02778
	8	0.55882	0.52941		8	1.72222	0.75		8	0.47059	1.08824		8	1.19444	4		8	0.32353	0.82353		8	1.47222	3.97222
	9	0.29412	0.17647		9	1.44444	0.41667		9	0.32353	1.05882		9	1.41667	3.02778		9	0.47059	0.85294		9	1.44444	4.27778
	10	0.32353	0		10	1.27778	1.22222		10	0.35294	0.70588		10	1.52778	1.66667		10	0.47059	0.64706		10	1.27778	2.69444
	11	0.32353	0.11765		11	1.25	2.08333		11	0.29412	0.32353		11	1.27778	1.30556		11	0.38235	0.44118		11	1	1.08333
	12	0.5	0.14706		12	1.30556	3.16667		12	0.14706	0		12	0.77778	1.30556		12	0.35294	0.08824		12	0.72222	0.58333
	13	0.38235	0.35294		13	1.13889	3.66667		13	0.05882	0.02941		13	0.5	1.91667		13	0.47059	0		13	0.94444	1.52778
	14	0.41176	0.64706		14	1.16667	4		14	0	0		14	0.69444	2.94444		14	0.67647	0		14	1.33333	4.13889
	15	0.94118	0.88235		15	1.13889	3.69444		15	0.23529	0		15	0.94444	5.13889		15	0.44118	0.29412		15	2.13889	6.75
	16	1.23529	1.44118		16	1.08333	3.16667		16	0.44118	1.29412		16	1.25	6.66667		16	0.52941	1.55882		16	1.94444	6.05556
	17	1.08824	2		17	1.33333	3.75		17	0.44118	3.70588		17	1.80556	5.41667		17	0.55882	2.76471		17	1.13889	3.83333
	18	0.73529	1.41176		18	1.75	5.02778		18	0.23529	4.44118		18	1.75	2.69444		18	0.55882	3.82353		18	0.97222	1.80556
	19	0.5	0.85294		19	2.55556	5.38889		19	0.20588	2.41176		19	1.47222	2.41667		19	0.35294	4.02941		19	1	2.52778
	20	0.73529	0.73529		20	2.77778	4.16667		20	0.26471	0.41176		20	1.47222	3.11111		20	0.38235	2.94118		20	1.55556	3.88889
	21	1.05882	1.61765		21	1.97222	3.05556		21	0.32353	0.67647		21	1.80556	3.02778		21	0.55882	1.58824		21	1.86111	3.52778
	22	1.29412	2.17647		22	1	2.22222		22	0.61765	2		22	1.61111	2.5		22	0.82353	1.91176		22	1.77778	2.33333
	23	1.05882	1.32353		23	1.25	1.08333		23	0.82353	3.05882		23	1.11111	1.80556		23	1.02941	2.5		23	1.52778	2.27778
	24	0.55882	0.52941		24	1.58333	0.91667		24	0.82353	2.88235		24	1.33333	1.72222		24	0.85294	2.58824		24	1.25	2.33333
	25	0.32353	0.20588		25	1.47222	0.91667		25	0.88235	1.52941		25	1.38889	1.19444		25	0.44118	2.05882		25	1.11111	1.66667
	26	0.41176	0.44118		26	0.75	0.38889		26	1.05882	0.85294		26	1.19444	0.27778		26	0.41176	1.35294		26	1.63889	1.22222
	27	0.52941	0.55882		27	0.77778	0.97222		27	0.61765	0.64706		27	0.94444	0.05556		27	0.44118	0.76471		27	2.41667	1.5
	28	0.52941	0.23529		28	0.88889	2.44444		28	0.58824	1		28	0.61111	0.55556		28	0.55882	0.35294		28	2.33333	2
	29	0.38235	0.58824		29	1.30556	3.27778		29	0.5	1.14706		29	0.80556	2.11111		29	0.47059	0.85294		29	1.16667	2.63889
	30	0.35294	1.73529		30	1.97222	4		30	0.29412	1.23529		30	1.36111	4.38889		30	0.55882	2.02941		30	0.5	3.44444
	31	0.73529	2.52941		31	2.83333	4.94444		31	0.35294	2.14706		31	1.72222	5.80556		31	1	3.55882		31	0.72222	4.11111
	32	0.94118	2.38235		32	2.83333	5.5		32	0.35294	3.41176		32	2.41667	5.41667		32	0.85294	4.23529		32	1.22222	3.86111
	33	0.94118	1.67647		33	2	4.58333		33	0.64706	3.5		33	2.86111	3.55556		33	0.55882	4.08824		33	1.91667	3.55556
	34	1.32353	0.88235		34	1.77778	2.19444		34	0.55882	2.70588		34	2.5	2.08333		34	0.17647	3.38235		34	2.36111	2.61111
	35	1.11765	0.35294		35	1.36111	0.88889		35	0.67647	2.5		35	1.69444	0.97222		35	0.52941	2.64706		35	2.30556	1.47222
	36	0.94118	0.26471		36	0.83333	0.30556		36	0.94118	2.35294		36	0.88889	0.55556		36	0.79412	2.29412		36	1.91667	0.75
	37	0.67647	0.14706		37	0.47222	0.25		37	1	1.64706		37	0.69444	0.05556		37	0.94118	1.88235		37	1.58333	0.55556
	38	0.5	0.26471		38	0.72222	0.05556		38	0.85294	1.5		38	0.47222	0.08333		38	0.73529	1.26471		38	1.30556	0.44444
	39	0.47059	0.55882		39	1.22222	0.80556		39	0.64706	1.70588		39	0.88889	0.30556		39	0.70588	1.14706		39	1.25	0.41667
	40	0.44118	0.73529		40	1.88889	2.94444		40	0.52941	1.47059		40	1.27778	1.08333		40	0.85294	1		40	1.08333	0.58333
	41	1.08824	1.26471		41	1.77778	3.77778		41	0.38235	0.52941		41	1.25	2.41667		41	0.79412	0.44118		41	0.86111	1.19444
	42	1.23529	1.70588		42	0.55556	2.22222		42	0.58824	0.44118		42	1.19444	3.13889		42	0.58824	0.26471		42	1.47222	2.94444
	43	0.97059	1.5		43	0.13889	0.88889		43	0.70588	0.94118		43	0.97222	2.63889		43	0.58824	0.91176		43	2	3.80556
	44	0.64706	0.94118		44	0.55556	1.5		44	0.76471	1.67647		44	0.88889	2.55556		44	0.38235	1.76471		44	2.08333	3.19444
	45	0.58824	0.41176		45	1.16667	1.75		45	0.70588	1.85294		45	1.22222	2.16667		45	0.58824	2.17647		45	1.19444	1.72222
	46	0.58824	0.11765		46	2.02778	2.02778		46	0.44118	1.14706		46	1.38889	2.41667		46	0.67647	1.5		46	1.05556	2.08333
	47	0.5	0.47059		47	3.11111	3.30556		47	0.26471	0.20588		47	1.5	1.80556		47	0.76471	0.26471		47	1.52778	2.22222
	48	0.64706	1.32353		48	3.97222	5.08333		48	0.08824	0		48	1.5	1.72222		48	0.73529	0.14706		48	2.63889	1.47222
	49	0.91176	1.73529		49	4.27778	5.77778		49	0.11765	0.44118		49	1.58333	3.33333		49	0.55882	0.26471		49	3.38889	1.77778
	50	0.82353	1.32353		50	3.5	5.33333		50	0.5	1.76471		50	2.11111	5.13889		50	0.85294	0.70588		50	3.16667	3.44444
	51	0.67647	0.97059		51	2.88889	4.58333		51	0.91176	2.26471		51	2.69444	5.38889		51	1	2.29412		51	2.19444	4.33333
	52	0.79412	1.26471		52	2.55556	3.63889		52	1.17647	1.85294		52	2.47222	3.11111		52	1.02941	2.88235		52	1.44444	3.19444
	53	1.05882	2.47059		53	2.61111	2.72222		53	1.29412	1.70588		53	1.80556	2.41667		53	0.73529	2.38235		53	1.44444	1.91667
	54	1.26471	2.58824		54	3.41667	1.72222		54	1.08824	2.44118		54	2.52778	3.77778		54	0.76471	2.73529		54	2.19444	2.88889
	55	1.02941	1.55882		55	3.88889	1.36111		55	0.91176	2.38235		55	3.33333	2.97222		55	1.11765	2.82353		55	2.69444	2.83333
	56	0.91176	0.91176		56	3.38889	0.66667		56	0.85294	1.76471		56	2.75	0.52778		56	0.97059	2.20588		56	2.33333	1.33333
	57	1	0.79412		57	2.91667	0.27778		57	0.94118	1.67647		57	1.72222	0.41667		57	1.05882	1.76471		57	1.80556	0.88889
	58	0.76471	0.67647		58	2.44444	0.63889		58	1.08824	1.79412		58	1.5	0.16667		58	1.08824	1.52941		58	1.69444	0.77778
	59	0.55882	0.5		59	2.63889	2.36111		59	0.82353	1.26471		59	0.97222	0.88889		59	0.97059	1.11765		59	1.72222	1.47222
	60	0.29412	0.38235		60	2	5.69444		60	0.32353	0.17647		60	0.41667	2.44444		60	0.73529	0.58824		60	1.94444	2.38889
	61	0.32353	0.23529		61	1.55556	6.72222		61	0.38235	0		61	0.77778	4.80556		61	0.58824	0.14706		61	2.36111	3.11111
	62	0.55882	0.11765		62	1.41667	5.08333		62	0.5	0		62	1.08333	6.25		62	0.44118	0.23529		62	2.86111	4.75
	63	0.55882	0.02941		63	1.61111	4.44444		63	0.41176	0.05882		63	1.30556	4.72222		63	0.55882	0.35294		63	2.86111	5.33333
	64	0.91176	0.26471		64	1.63889	3.88889		64	0.29412	0.11765		64	1.33333	3.05556		64	0.79412	0.26471		64	2.41667	4.22222
	65	1.47059	0.5		65	2.72222	1.80556		65	0.41176	0.14706		65	1.33333	2.11111		65	0.64706	0.11765		65	1.33333	3.38889
	66	1.52941	0.44118		66	2.47222	1.19444		66	0.47059	0.05882		66	1.02778	1.55556		66	0.44118	0.05882		66	1.05556	2.38889
	67	1.23529	0.20588		67	1.80556	2.88889		67	0.32353	0		67	0.66667	0.97222		67	0.47059	0		67	1.02778	1.16667
	68	0.79412	0.08824		68	1.86111	5.86111		68	0.17647	0		68	1.08333	1.02778		68	0.44118	0		68	1.05556	0.86111
	69	0.64706	0.32353		69	2.38889	5.44444		69	0.32353	0		69	1.63889	2.75		69	0.64706	0		69	1.13889	2.19444
	70	0.73529	0.85294		70	2.61111	2.41667		70	0.47059	0		70	2.08333	5.08333		70	0.52941	0		70	1.47222	4.66667
	71	0.85294	1.23529		71	1.72222	0.27778		71	0.52941	0.17647		71	2.30556	4.5		71	0.41176	0.05882		71	1.72222	4.91667
	72	0.97059	1.11765		72	1.58333	0.02778		72	0.70588	0.58824		72	1.94444	2.13889		72	0.44118	0.20588		72	2	2.83333
	73	1.17647	1.17647		73	1.86111	0.19444		73	0.70588	1.02941		73	1.97222	0.5		73	0.85294	0.82353		73	2.05556	0.66667
	74	0.91176	1.17647		74	2.33333	0.33333		74	0.70588	1.05882		74	2.08333	0.16667		74	1.17647	1.26471		74	1.97222	0.05556
	75	0.85294	1.52941		75	2.66667	0.58333		75	0.85294	1.29412		75	1.77778	0.13889		75	1.23529	1.32353		75	2.02778	0.08333
	76	0.58824	1.73529		76	3.08333	0.58333		76	0.70588	1.94118		76	0.88889	0.19444		76	1	1.64706		76	2.30556	0
	77	0.58824	1.61765		77	3.52778	1.55556		77	0.47059	2.47059		77	0.75	0.86111		77	0.82353	2.11765		77	2.19444	0.61111
	78	0.55882	1.29412		78	3.05556	2.52778		78	0.35294	2.79412		78	1.5	2.88889		78	0.76471	2.5		78	2	2.13889
	79	0.82353	1.55882		79	1.77778	2.69444		79	0.52941	2.76471		79	2.52778	4		79	0.61765	3		79	1.91667	3.66667
	80	1	1.82353		80	1.33333	2.66667		80	0.67647	1.94118		80	2.05556	3.91667		80	0.97059	2.76471		80	1.69444	4.22222
	81	0.97059	1.91176		81	1.44444	2.30556		81	0.88235	0.91176		81	0.88889	2.97222		81	0.91176	1.79412		81	1.83333	3.22222
	82	0.58824	1.67647		82	1.58333	1.11111		82	0.67647	0.5		82	0.36111	2.36111		82	0.47059	0.61765		82	1.97222	2.66667
	83	0.88235	1.23529		83	1.86111	0.52778		83	0.44118	0.67647		83	0.72222	1.16667		83	0.29412	0.41176		83	1.77778	1.86111
	84	1.41176	0.85294		84	0.97222	0.47222		84	0.32353	0.55882		84	0.75	0.19444		84	0.55882	0.55882		84	1.02778	0.88889
	85	1.17647	0.47059		85	0.75	0.27778		85	0.58824	0.55882		85	0.77778	0.08333		85	0.97059	0.58824		85	0.66667	0.05556
	86	0.47059	0.55882		86	0.83333	0.25		86	0.82353	0.58824		86	0.69444	0.22222		86	0.85294	0.73529		86	0.52778	0
	87	0.44118	0.73529		87	0.83333	0.33333		87	0.82353	0.55882		87	0.77778	0.25		87	0.58824	0.58824		87	0.52778	0.08333
	88	0.67647	0.79412		88	0.55556	0.36111		88	0.64706	0.79412		88	0.69444	0.47222		88	0.67647	0.5		88	0.61111	0.05556
	89	0.70588	0.88235		89	0.55556	0.33333		89	0.44118	1.29412		89	0.27778	0.44444		89	0.79412	1.14706		89	0.77778	0.16667
	90	0.79412	0.88235		90	0.66667	0.88889		90	0.44118	1.55882		90	0.30556	0.38889		90	0.76471	1.32353		90	0.80556	0.22222
	91	0.85294	0.79412		91	0.55556	0.91667		91	0.35294	0.88235		91	1.08333	0.88889		91	0.76471	0.88235		91	0.75	0.41667
	92	0.88235	0.61765		92	0.91667	0.5		92	0.14706	0.47059		92	1.83333	0.97222		92	1	0.44118		92	0.97222	0.80556
	93	0.94118	0.41176		93	1.08333	0.55556		93	0.11765	0.76471		93	1.83333	0.44444		93	0.82353	0.61765		93	1.11111	0.94444
	94	0.91176	0.41176		94	1.38889	0.5		94	0.32353	1.20588		94	1.30556	0.38889		94	0.52941	1.55882		94	1.30556	0.94444
	95	0.85294	0.70588		95	1.69444	0.69444		95	0.35294	1.35294		95	1.16667	0.41667		95	0.5	2.17647		95	1.5	1.05556
	96	0.70588	1.35294		96	1.94444	0.75		96	0.44118	1.08824		96	1.33333	0.58333		96	0.32353	1.44118		96	1.36111	1.27778
	97	0.94118	1.5		97	2.05556	0.5		97	0.52941	0.88235		97	1.47222	0.97222		97	0.29412	0.52941		97	1.25	1.30556
	98	1.32353	1.5		98	1.83333	0.11111		98	0.44118	0.58824		98	1.52778	0.86111		98	0.26471	0.67647		98	1.22222	0.91667
	99	1.44118	1.5		99	1.41667	0.11111		99	0.73529	0.79412		99	1.30556	0.41667		99	0.35294	1.20588		99	1.36111	0.38889
	100	0.97059	1.14706		100	1.77778	0.16667		100	0.88235	1.23529		100	1.41667	0.16667		100	0.79412	1.55882		100	1.58333	0.30556
	101	0.64706	0.70588		101	2.05556	0.27778		101	0.52941	1.76471		101	1.44444	0.11111		101	0.91176	1.76471		101	1.52778	0.36111
	102	0.44118	0.58824		102	1.63889	0.19444		102	0.61765	1.58824		102	1.47222	0.13889		102	0.88235	1.52941		102	1.41667	0.44444
	103	0.47059	0.5		103	1.47222	0.05556		103	0.47059	0.79412		103	1.55556	0.19444		103	0.70588	0.97059		103	1.83333	0.25
	104	0.5	0.17647		104	1.47222	0		104	0.5	0.38235		104	1.5	0.08333		104	0.79412	0.52941		104	2.13889	0.02778
	105	0.5	0.02941		105	1.61111	0.08333		105	0.64706	0.23529		105	1.08333	0.05556		105	0.82353	0.17647		105	2.08333	0
	106	0.52941	0.17647		106	1.58333	0.05556		106	0.70588	0.05882		106	0.36111	0.02778		106	0.47059	0.05882		106	1.30556	0.05556
	107	0.52941	0.55882		107	1.19444	0.02778		107	0.76471	0.23529		107	0.19444	0.02778		107	0.38235	0.38235		107	0.72222	0.05556
	108	0.73529	0.76471		108	1.94444	0.33333		108	0.70588	0.55882		108	0.27778	0.02778		108	0.44118	0.76471		108	0.61111	0
	109	1	0.76471		109	3	0.91667		109	0.79412	0.67647		109	0.63889	0.11111		109	0.94118	0.64706		109	0.83333	0.08333
	110	2.14706	0.55882		110	2.5	1.5		110	1.08824	0.47059		110	1.05556	0.61111		110	1.05882	0.52941		110	1.25	0.41667
	111	2.52941	0.17647		111	1.75	1.41667		111	1.32353	0.29412		111	1.58333	0.94444		111	1.29412	0.55882		111	2.08333	1.02778
	112	2.26471	0.20588		112	1.22222	0.80556		112	1.14706	0.08824		112	1.88889	0.77778		112	1.05882	0.5		112	2.33333	1.38889
	113	1.35294	0.02941		113	0.88889	0.16667		113	0.76471	0.02941		113	1.33333	0.44444		113	0.73529	0.29412		113	1.63889	0.88889

## Sheet: Panel C
IP3R1	AVERAGE	STD ERROR
	109.2	16.8953
	109	15.9765
	106.2	17.6668
	116.2	19.8545
	111.2	14.2461
	109.2	12.6669
	106.8	16.2517
	114.6	15.5526
	109.2	14.9371
	111.8	14.0931
	114	19.5299
IP3R1 RQ/KQ	117.5	22.5721
	127.25	23.6445
	120.5	25.0692
	118.875	27.327
	125.875	27.2708
	117.75	25.5544
	117.375	21.8247
	122.875	19.8444
	122.25	22.4942
	125.25	21.3882
	122.125	19.7633

## Sheet: Panel D
IP3R1	average	std error		Time (min)
	106.571	18.5906		0
	107.143	14.5527		1
	129	22.0281		2
	132.714	23.8554		3
	138.286	24.5189		4
	151.714	24.408		5
	132	22.8786		6
	133.286	25.0587		7
	137.714	24.9912		8
	136.429	25.7153		9
	138.143	22.6194		10
	average	std error		Time (min)
IP3R1 RQ/KQ	72.375	19.3569		0
	65.625	17.7303		1
	74.625	20.6001		2
	76	19.9551		3
	80.25	20.6425		4
	73.125	18.5928		5
	79.375	20.6446		6
	73.25	18.504		7
	75.625	18.8614		8
	75.125	18.5048		9
	77.625	18.0814		10

## Sheet: Panel E
	Change in no of SIM1 puncta	std error
IP3R1	55.2857	17.6631
IP3R1 RQ/KQ	12.875	3.01447
