# Supplementary material for: Regulation of store-operated Ca2+ entry by IP3 receptors independent of their ability to release Ca2+
Source: eLife journal article supplement (doi:10.7554/elife.80447), 2023-07-19
Supplement: fig6-figsupp1-data1 [file Figure 6- figure supplement 1.xlsx]

## Sheet: Panel B
	Time (min)	STIM1 intensity	std err.
WT	0	69.2005	7.79727
	1	71.966	10.168
	2	72.6778	9.48921
	3	75.7022	10.2586
	4	77.167	8.65094
	5	84.0927	14.3878
	6	83.843	13.4254
	7	86.1445	13.141
	8	80.4982	8.91243
	9	82.1095	10.6302
	10	83.886	12.5526
IP3R1 RQ/KQ	0	28.949	3.72699
	1	29.7415	3.89921
	2	28.0202	5.09479
	3	29.5407	4.88297
	4	31.8065	6.34992
	5	32.1392	7.21961
	6	32.132	6.3358
	7	30.8217	5.62332
	8	29.7015	4.96147
	9	30.5522	5.3803
	10	30.9372	5.79178

## Sheet: Panel C
	Time (min)	IP3R1 intensity	std err.
WT	0	20.2015	3.60101
	1	19.9615	3.97678
	2	20.1738	3.56856
	3	20.2838	3.68302
	4	20.0455	3.31384
	5	19.9468	3.4362
	6	20.1425	3.46682
	7	19.368	3.52842
	8	19.3468	3.41703
	9	19.1813	3.11163
	10	19.6685	3.70194
IP3R1 RQ/KQ	0	16.1608	2.21858
	1	13.883	2.29887
	2	13.6703	2.14491
	3	13.6788	1.72496
	4	13.7835	1.94544
	5	12.182	2.25576
	6	12.957	1.81615
	7	11.7198	2.24898
	8	11.029	1.97596
	9	11.3038	2.13629
	10	14.2535	2.72658

## Sheet: Panel D
	STIM1 Intensity	std err.
WT	31.243	4.0179
LBD	3.14325	0.53547
No of ROIs calculated	7
N	6
P value	Equal Variance NOT Assumed (Welch Correction)	0.00549

## Sheet: Panel E
	IP3R1 intensity	std err.
WT	0.732	0.13153
LBD	0.30175	0.06907
No of ROIs calculated	7
N	6
P value	Equal Variance NOT Assumed (Welch Correction)	0.03808
