# Supplementary material for: Regulation of store-operated Ca2+ entry by IP3 receptors independent of their ability to release Ca2+
Source: eLife journal article supplement (doi:10.7554/elife.80447), 2023-07-19
Supplement: fig7-data1 [file Figure 7 source data 1.xlsx]

## Sheet: Figure 6A-6C
IP3R1 shRNA+ESYT1	23.841	23.7434	23.0454	21.9636	22.1495	21.4402	21.3078	21.094	21.0095	20.6541	20.0208	20.2742	19.9254	19.5485	19.2806	18.77	18.9771	18.2971	18.2364	18.1868	18.3484	18.2547	18.1676	18.5267	18.95	22.6148	24.5256	26.2992	27.8681	30.138	32.9026	35.9092	38.6638	40.665	43.2236	46.0236	49.0336	51.976	54.6389	57.5449	59.6049	63.1568	65.3719	67.1725	69.3179	72.0726	73.9581	75.9259	78.7029
	36.5925	36.8558	35.0559	34.1856	32.9605	32.5613	32.321	32.7266	31.8815	31.3445	30.7405	30.3053	30.7801	30.2846	30.5924	29.819	29.4272	29.003	29.2767	28.8256	28.9507	28.9891	28.6977	29.3096	30.313	33.434	35.938	37.0369	39.5457	41.3327	44.6111	48.5564	50.3935	51.9588	55.0095	58.3764	61.2521	63.8179	66.6573	69.6032	72.8227	75.9192	77.9822	80.6126	82.7607	85.247	86.8386	89.772	92.7601
	38.0029	38.502	37.42	36.3648	35.3602	34.925	34.9729	34.9541	34.0972	33.7754	33.3192	33.2207	33.0091	32.6369	32.5572	31.7395	31.6162	30.9696	30.9929	30.5285	30.855	30.6809	31.0814	31.1702	31.6394	38.3723	40.1905	42.9552	46.4799	49.3251	53.0269	57.3204	61.3273	63.7811	67.7571	72.2196	76.5821	79.6909	83.4331	87.8904	90.3506	95.3094	97.7643	101.188	103.408	107.501	108.465	112.215	115.443
	21.6343	21.7901	21.1031	20.0062	19.9368	19.4022	19.3885	19.3059	19.1826	18.7371	18.5908	18.4963	18.7795	18.2061	18.34	17.9093	17.6385	17.5398	17.3321	17.1586	17.0987	17.3043	17.7179	17.9043	17.7362	22.0147	22.9912	24.4369	26.1121	27.6216	30.1129	33.2302	35.7915	37.8059	39.5758	42.8181	45.3472	48.2337	50.4181	53.7792	56.7335	59.4042	62.0963	64.6263	66.7382	69.2328	70.615	73.0569	75.4608
	22.8166	22.685	22.6027	21.7977	20.8903	20.5281	19.9713	20.0471	19.3425	19.431	18.9552	18.939	19.205	18.8716	18.2227	18.2404	17.2904	17.7855	17.2975	16.7023	16.6136	17.0166	17.0257	17.0463	17.6041	22.849	24.3257	26.0943	29.9735	32.0038	35.7876	39.7484	42.2578	45.6768	48.8323	53.266	56.7721	60.0589	63.2641	66.6698	70.2436	73.6942	76.8519	79.6711	82.7533	85.5052	87.0867	89.5158	92.8817
	26.9364	26.7796	26.1475	24.9829	24.3753	24.0808	23.6433	23.6649	23.4988	23.2963	23.1834	22.9653	23.077	23.2399	22.7805	22.2634	22.1737	21.73	21.6686	21.2141	21.4249	21.7104	21.9911	22.1958	22.1573	26.3695	27.1553	28.5367	30.507	31.995	33.7896	36.368	38.6337	40.6411	43.1328	45.5323	47.8513	50.5062	52.9284	56.1641	58.9746	61.4182	63.8021	65.8912	67.9828	69.8986	72.1893	74.2117	76.3525
	21.5977	21.3451	20.7239	19.9264	19.1841	18.8214	18.8219	18.2982	18.5456	18.2118	17.7945	18.0741	17.9218	17.855	17.3074	17.2417	16.9891	16.7142	16.2565	16.217	16.0831	16.4755	16.6425	16.6635	16.7204	19.7626	20.9126	22.5562	24.2565	25.8501	28.2255	31.6898	33.7208	35.5815	37.8492	40.7513	43.6406	45.9539	48.3034	51.5104	54.2435	56.8287	59.009	61.038	63.5715	66.4068	67.6142	70.6533	72.4953
	25.5787	25.4021	24.7695	24.1571	23.601	22.9824	23.044	22.7812	22.5612	22.7587	22.1339	22.2731	22.3286	22.1022	21.6343	21.1598	21.1158	20.9146	20.5409	20.6159	20.4231	20.521	20.2488	21.0646	20.5977	24.5848	25.4929	27.3311	28.9552	30.6725	32.7461	35.8991	38.4356	40.4409	42.5563	45.4818	48.1155	50.4234	52.9627	56.1376	58.1702	61.2392	63.3106	65.8516	67.7553	70.1622	71.6959	74.6168	76.7176
	35.4739	35.5541	34.7293	33.6312	33.5571	32.7264	32.8259	32.4783	31.8872	31.9041	31.2083	30.6058	30.7828	31.3385	30.8456	29.9383	29.909	29.5762	28.8552	28.2544	28.7091	29.1463	29.0638	29.0698	29.5393	32.9581	34.5142	35.9464	37.655	39.1548	41.7429	44.7854	47.7499	49.1422	51.5315	54.208	57.4939	60.2327	63.2848	66.5966	70.1225	72.9162	76.2092	78.8229	81.4407	84.7577	87.0525	90.3531	93.544
	28.8329	28.4112	28.1126	26.866	26.4715	27.0634	26.1018	26.6576	25.7643	25.7577	25.7462	25.7921	25.3504	25.2088	25.0612	24.5925	24.9013	24.1328	23.3476	22.8578	23.1765	23.0818	23.7631	24.7086	24.3504	28.7298	29.9543	31.621	33.114	34.9421	37.3484	39.9888	42.6909	44.7581	46.8824	50.0522	53.8783	56.2406	59.3396	63.1602	66.0025	69.5953	73.5206	76.6777	79.3436	82.9494	86.0262	90.3464	94.2583
	33.3425	33.5003	32.4733	31.8059	30.912	31.0268	30.7471	30.0415	29.5253	29.2971	29.1414	28.8535	28.3227	28.6806	28.1165	27.5083	27.963	27.147	26.7621	26.8861	26.5439	26.5126	26.3098	26.6436	27.031	30.2225	31.6404	33.0015	35.0397	36.8052	38.7242	41.1608	44.0362	45.3252	47.766	50.6606	54.1011	56.0175	58.9931	61.8642	64.9137	68.0629	70.8137	73.7467	76.0316	79.1926	81.969	83.9942	88.1288
	29.4494	29.5026	30.2493	30.2153	29.9499	30.0242	30.1267	30.5076	32.1832	34.3399	35.9278	36.2182	36.7614	36.2533	35.6629	35.0809	34.4728	34.0386	33.7575	33.2355	33.3425	33.1515	33.41	32.5958	32.7685	30.0223	30.6822	31.9779	33.0871	34.5932	36.3409	38.7855	40.7044	43.1607	45.5605	48.1583	50.6171	53.1689	55.8378	58.165	60.6262	63.7083	66.3991	69.0179	72.0833	74.7374	78.0496	80.4113	82.8083
	20.3429	21.2565	21.3755	21.8636	21.8244	21.4133	21.5553	21.4889	21.9482	22.1176	23.0319	22.8934	23.188	23.0443	22.7659	23.0958	22.843	22.9243	23.0398	22.7837	23.5852	23.0472	23.1762	22.2205	22.9044	20.8177	21.82	22.7675	24.5454	27.5319	29.4935	32.5645	34.2248	36.5122	39.0704	41.545	44.4365	47.2096	50.5672	52.08	54.8553	57.9447	61.2377	63.8411	66.0074	68.8977	72.269	74.6516	77.2859
	46.1975	47.0733	47.1664	47.3351	47.2782	47.0125	47.2049	47.313	47.4906	48.5242	49.7623	48.9971	49.204	49.2659	49.1318	49.3606	48.881	49.208	48.9138	48.8151	48.8739	49.4534	48.6653	48.4016	48.3478	46.109	46.8916	48.2514	50.1941	48.9831	51.7641	54.5519	55.3789	58.6469	61.1298	63.5859	66.7961	69.3322	72.2898	74.7007	76.7044	79.7151	83.1207	85.9571	88.31	90.9941	95.4162	97.1726	99.8619
	85.5805	85.6806	86.7875	86.6363	87.3494	86.2394	86.6851	87.2371	87.0655	87.5705	90.0401	89.1668	88.7284	89.3232	88.0727	87.8657	86.9743	88.0508	87.3287	86.5544	87.167	87.5725	88.3684	86.9148	86.3925	84.2938	86.186	86.8068	89.1017	86.6301	89.5242	92.869	96.5377	98.9016	103.208	105.361	109.646	113.617	117.992	121.767	125.672	129.292	134.135	137.251	142.01	147.622	153.962	156.437	158.6
	34.5184	34.3102	34.574	34.9251	35.2454	35.1166	35.2114	35.526	35.0427	35.925	36.8533	36.9057	36.5359	37.011	36.3514	36.5001	36.4507	36.4537	36.4792	36.5886	36.4902	36.3657	36.531	36.4838	35.9351	34.4112	34.0466	35.6089	36.2179	36.9099	38.3289	40.0671	41.4335	43.0024	44.735	47.224	49.7263	51.6465	54.7245	56.8356	59.623	63.4778	66.3345	69.7344	73.0028	76.6577	80.7057	83.1975	86.4292
	46.7836	47.1319	47.9007	47.3102	47.6001	47.6739	47.492	47.5962	47.7575	48.5736	49.4769	49.3972	49.6395	49.0971	48.7891	49.0001	49.1062	49.322	48.9131	48.7012	49.1785	49.2138	49.2609	49.0617	49.2211	47.4245	48.3346	49.93	50.9879	55.0545	57.1055	60.3313	62.2003	65.0602	66.9537	70.652	73.5069	76.5957	80.1546	82.5838	86.5501	90.1896	94.0596	96.975	101.198	104.384	109.035	111.799	116.023
	31.3779	31.4076	32.0464	31.9518	31.972	31.9595	31.951	31.8312	32.4603	32.7828	33.7785	33.1832	33.5781	33.4819	32.8973	33.1705	32.917	33.1529	33.0655	33.0877	33.1161	33.1737	32.9556	32.6794	32.466	29.6944	30.2669	30.746	31.0905	30.8933	31.5386	33.1833	34.1315	35.3137	37.0015	38.8433	40.5693	42.4065	44.4716	46.4178	48.776	51.2106	53.7664	56.3159	59.2165	62.1553	65.7313	68.4219	71.4044
	36.0273	36.2798	36.7435	36.0058	36.249	36.6828	36.3287	36.3385	36.6192	37.3097	38.2157	37.5395	37.4073	37.8483	37.2767	37.141	36.5403	36.7339	36.5812	36.8652	36.8529	37.0778	37.18	36.642	36.2754	33.2933	33.6379	34.1884	34.7012	34.5259	34.9542	36.796	38.1768	39.7494	40.9619	42.2726	44.3242	45.7427	48.1174	49.7234	51.8305	54.1983	56.8755	59.3508	61.858	63.7249	67.4344	69.8646	71.7771
	46.2049	46.7388	47.1856	46.7465	46.899	47.1061	46.4407	46.5219	46.5595	47.6205	47.8776	47.791	47.8734	47.9154	47.4781	47.4622	47.2695	47.1284	47.2157	47.2836	46.9402	46.3309	46.7379	47.2513	45.8602	45.4921	45.642	46.4606	46.1093	45.425	46.2672	47.9573	49.3311	50.5512	52.5906	54.5456	56.1019	57.8596	60.0898	62.3173	63.9126	66.6965	69.274	72.3742	74.1744	77.1986	80.5854	83.0013	85.925
	24.6391	24.95	25.416	25.4609	25.4202	25.7734	25.8019	25.5872	26.1019	26.4732	27.5211	26.8823	27.0152	27.2513	26.9636	26.8778	26.9914	27.0499	26.8201	26.7466	26.8199	26.4145	27.0904	26.6917	26.7147	23.7832	24.6121	25.3169	25.8801	26.9498	28.0911	30.3761	31.6346	33.4712	35.6414	37.2388	39.6732	42.403	44.5172	46.7384	49.245	52.591	55.6328	58.4622	61.2928	63.7167	68.0481	70.3436	73.6155
	23.7032	24.3172	24.1192	24.1794	24.3089	24.3738	24.4483	24.2732	24.4974	24.9988	25.2887	25.3391	25.2515	25.0344	25.2061	24.7063	24.5425	24.8349	24.618	24.1677	24.4023	24.4408	24.7258	24.3177	24.1357	20.7563	21.3724	21.9102	22.0732	23.1829	24.1977	25.5731	26.5098	28.5701	29.8513	31.4625	33.39	35.1488	36.9372	38.3128	40.9452	43.3871	45.4249	47.843	50.7653	53.7894	56.6705	59.5527	62.6143
	38.8762	39.229	39.5988	39.8031	39.5058	39.9891	39.9504	40.2308	40.1489	40.9063	41.7058	41.156	41.4164	41.495	41.3713	41.5727	41.3385	41.4203	41.4501	41.2349	41.0095	41.2021	41.3907	40.4636	41.1213	36.9541	38.2362	38.8674	39.1816	42.7254	43.7139	45.6057	46.5471	48.6143	49.7359	51.218	53.2867	55.2084	57.2841	59.0239	61.2332	64.2434	66.7801	69.384	71.3615	74.8995	78.0372	81.131	84.306
	29.8812	30.0522	30.8511	30.6549	30.3641	30.2267	30.4675	30.6578	30.6193	31.3418	32.191	32.0088	32.2724	32.2209	31.9537	31.9261	31.7983	32.148	32.0396	31.853	32.3031	31.6171	32.2068	31.8847	31.7969	29.2327	29.7516	30.4857	31.011	32.1166	33.8334	35.8545	37.5304	39.283	40.7481	43.3881	45.6756	47.6707	50.6696	53.1625	56.1527	59.2024	62.6001	65.3881	68.5867	71.6983	76.6977	79.7558	83.5782
	43.2708	43.7348	43.6786	43.9438	44.693	43.1574	43.9108	43.9219	44.4655	44.9598	44.8601	45.5176	45.7772	46.1509	46.1844	45.2779	45.5738	45.8868	45.6041	45.4971	46.2333	45.8396	45.304	45.5679	46.0918	43.8357	44.1774	44.6353	46.1686	47.824	49.3519	51.501	53.3415	55.0318	57.439	60.4524	62.6265	64.7666	67.9602	70.5724	71.9814	76.813	80.3063	83.1323	87.4397	90.5185	95.7592	98.1667	102.86
	23.9998	23.5997	23.9775	24.2452	24.4436	24.9691	25.0779	24.9208	24.6455	24.4093	23.9998	23.6794	23.1532	22.6419	22.5811	22.505	22.0821	21.9633	22.1156	22.3433	22.2394	22.3	22.0263	21.9291	21.5575	20.2888	21.0274	21.6788	23.4099	24.2489	25.6778	27.0809	28.2997	29.8603	31.7768	33.9362	36.0949	38.1306	40.0773	42.5305	44.5637	46.1818	47.5689	49.3294	50.8851	52.8292	55.4203	57.0235	60.1935
	28.4337	28.5336	28.7144	28.9682	29.2947	29.7071	29.7495	29.4002	29.0513	28.7173	28.4337	27.8307	27.2438	26.8918	26.5954	26.5032	26.1411	26.0954	26.2348	26.349	25.9593	25.9323	25.6047	25.677	25.4122	23.9661	24.6106	25.2679	26.3474	27.1595	28.4056	29.7621	30.7009	32.2316	33.6607	35.4305	37.6055	39.6182	41.4428	43.5957	45.784	47.6957	49.2229	51.0577	52.9736	55.2105	57.9041	59.7508	63.2225
	39.9791	40.5063	41.0802	41.5857	41.2748	41.6761	41.3873	41.3674	40.7601	40.9066	39.9791	39.0345	38.2379	37.8791	37.1955	37.2669	36.546	36.5769	36.1572	36.642	35.9587	36.1873	35.9624	35.746	35.1866	33.9366	34.198	34.9919	36.4457	37.0903	38.9711	40.1522	41.4952	42.9657	44.2999	46.9941	49.4714	51.9734	54.3382	56.812	58.8649	61.0098	62.4268	64.9543	66.1714	68.6559	71.2987	73.785	76.9275
	35.447	36.2074	36.1608	36.486	37.0299	37.0473	37.1316	36.8458	36.0856	35.929	35.447	36.3205	35.5892	35.1639	34.9885	34.8419	34.3518	34.3091	34.1411	33.6928	33.6737	34.2868	33.3327	33.7355	33.0644	31.634	32.2676	33.0278	34.4511	34.9125	36.8112	39.9783	41.3179	42.3721	43.8369	45.7939	47.9737	49.4596	51.1673	53.0728	54.3717	56.0451	57.0878	58.3194	59.0834	61.868	63.1011	64.4957	67.5329
	12.9865	12.5105	12.5309	12.9137	13.552	13.8202	13.9785	13.5723	13.3647	13.5273	12.9865	12.572	12.5267	12.1396	11.8674	12.0047	11.6506	11.7256	11.6488	11.7522	11.4972	11.41	11.0942	11.5545	11.1962	9.39867	9.71497	10.3459	11.708	12.6069	13.7951	15.3549	16.8108	17.7232	19.2103	20.945	23.0753	24.7206	26.3145	27.9279	29.6607	30.9881	32.0221	33.0098	34.2648	35.7414	37.375	38.7807	41.1269
	21.6488	21.2961	21.7291	21.8149	21.973	22.3406	22.7643	22.3401	21.8503	21.731	21.6488	21.3922	20.8246	20.4527	19.8665	19.9345	19.6377	19.4951	19.4592	19.7723	19.1873	19.2379	18.9525	18.9427	18.4137	16.9017	17.1916	17.6743	18.6081	19.0862	20.2098	21.7576	22.8173	24.0416	25.2567	27.1325	29.1939	31.3493	33.4556	35.0639	37.1144	38.7881	40.2164	42.0837	43.9418	46.1279	48.1685	50.3335	53.9359
	31.8246	32.3758	32.4853	32.9308	33.0942	33.6224	33.1787	32.7081	32.0378	32.3644	31.8246	31.6914	30.9941	30.1508	29.7709	29.7059	29.2448	29.4191	29.5017	29.4982	29.2124	29.0523	28.7905	28.5353	27.9244	25.804	25.6497	26.0977	26.9392	27.8022	28.644	29.6845	29.9787	31.1767	31.907	34.1506	35.4447	37.0988	38.8635	40.4536	42.2294	43.2298	44.5471	46.8048	47.5854	49.9563	52.3589	54.1304	57.4053
	41.8458	41.1197	42.1134	42.0192	42.6577	42.9493	43.3741	43.1925	42.7218	42.1413	41.8458	42.628	41.385	41.1973	40.4413	40.4908	40.0147	39.6318	39.3629	39.7047	39.0243	39.3092	39.2003	39.2087	39.0291	38.4316	38.8476	39.4912	40.9674	42.3316	43.8409	46.6418	48.1519	48.8942	51.1742	52.7756	54.3551	56.3301	57.548	58.5606	60.4147	61.4961	61.4807	62.5483	63.6201	64.8589	66.5799	67.6568	70.1541
	33.3493	33.0296	33.7343	33.9515	34.0652	34.6325	34.6247	35.03	34.3801	34.1892	33.3493	32.38	31.4043	31.3429	30.5809	30.6138	30.2402	30.0763	29.7539	30.3189	29.6999	30.3121	29.6439	29.4725	29.3434	28.6916	29.0864	29.8588	31.4206	32.3393	34.2937	35.2867	35.9378	37.5978	38.984	40.1549	42.3359	43.7296	45.1472	46.1742	47.2911	48.2313	48.5097	49.6952	49.9127	51.1279	52.4141	53.5373	55.6802
	27.5318	27.8809	27.9275	28.5722	28.8434	29.3198	29.1174	29.1987	28.4017	28.6504	27.5318	28.0068	27.5079	27.1777	26.6634	26.7742	26.0104	26.0144	25.9117	26.3773	26.1246	25.7132	25.5395	25.3854	24.6962	23.3799	23.6452	24.2496	24.7593	25.6005	25.8833	28.5281	29.0941	30.329	31.4642	33.1311	34.6352	36.1631	37.6155	39.5902	40.8245	42.3214	43.0121	44.386	45.6267	47.323	49.4751	51.1094	53.682
	31.2057	31.5672	31.6853	31.8331	32.1332	32.5502	32.4874	32.4502	31.8176	31.7454	31.2057	30.4381	29.9601	29.5451	28.9446	29.0344	28.655	28.3525	28.4398	28.4895	28.1005	28.4628	27.7763	27.8821	27.3779	25.4406	25.6055	26.3473	27.1907	27.9968	29.1251	29.9333	30.8399	31.9644	33.0018	34.4729	36.1491	37.7791	39.4087	41.0682	42.385	43.8513	44.436	45.5707	46.9617	48.6583	50.4389	51.8808	54.5414
	31.1374	32.6741	32.83	32.5366	32.5392	32.6836	32.5251	32.2304	31.7487	31.2504	31.1374	31.3249	32.1962	32.2449	31.726	32.3743	32.2899	31.8594	31.8123	32.1634	32.0426	31.8859	32.1227	32.3436	33.1124	32.2567	32.6112	33.8559	35.194	36.909	38.9587	40.5402	43.2127	46.1841	48.5648	51.5315	54.5897	57.8333	60.8816	64.534	67.4829	70.9023	74.3585	77.896	81.1598	85.142	88.7989	92.9653	97.6436
	40.8356	40.4376	40.1662	40.242	40.6496	40.5745	39.6141	40.2274	39.897	38.6418	38.8825	38.4099	40.2015	40.0367	39.9542	39.8749	39.8634	39.4562	39.2614	39.5564	38.9362	39.2308	39.4	39.4811	40.293	38.1533	38.8717	39.814	41.3537	43.1806	45.1285	47.6108	50.2791	53.0445	55.7278	57.881	60.9591	63.8937	66.4462	68.9358	72.0937	73.8875	76.1319	78.7314	81.0165	83.5178	85.3202	88.6016	91.3261
	32.7172	32.5665	32.306	32.306	32.7898	32.9832	32.3753	31.648	31.7879	31.2885	31.0586	30.7465	31.8897	31.3746	31.0762	31.4262	31.095	30.9923	30.8242	30.9934	30.3188	30.5322	30.8199	30.5877	31.2971	29.7603	30.7247	32.0381	34.6377	36.63	38.4752	40.6704	43.684	46.2712	48.9241	51.7101	53.828	56.6455	58.9831	61.9124	64.1778	67.1033	69.6577	71.5555	74.6665	77.2089	79.4194	82.8856	84.8167
	43.7173	43.888	43.3685	43.6017	43.5759	43.6565	43.8304	42.6702	42.5129	42.0421	42.0942	42.2284	43.0463	42.5662	42.1335	42.7288	42.7171	42.5742	42.099	42.3739	42.0316	41.8712	42.4607	42.094	42.5876	39.7814	40.9061	42.1174	44.2408	46.2097	48.1188	50.5385	52.6743	55.3837	58.128	60.5419	62.9497	65.8693	68.1072	71.0245	73.4075	75.6781	78.3203	80.1711	83.3308	85.3654	88.2931	91.0019	93.4578
	66.7396	66.9247	66.6216	66.5979	67.1619	66.8519	66.951	66.2258	66.4067	65.3422	65.3068	65.1586	67.4912	66.8766	66.2444	66.6663	66.729	66.1172	66.0445	66.3537	66.0524	66.326	66.7268	66.637	67.2959	65.7355	66.3975	68.3022	69.8571	71.5446	73.277	75.9624	78.7745	81.4362	84.946	87.5196	91.6483	95.6534	99.2086	102.956	106.78	111.115	114.981	119.469	123.03	126.932	131.498	135.632	139.817
	56.4552	56.5005	56.2155	55.9489	56.6746	56.368	55.6434	55.2359	55.1803	54.3939	54.2941	54.7175	55.7442	55.282	54.3204	55.362	55.268	54.628	54.7509	54.9884	54.0341	55.0498	54.6647	54.8464	55.9635	54.2173	55.3752	56.4393	58.7904	61.0179	64.1553	67.7711	70.8112	74.9217	79.3753	83.9263	88.2044	93.9392	99.5971	104.423	110.545	116.242	121.884	127.892	134.07	139.834	147.249	152.797	160.109
	52.4972	52.4339	51.8877	52.0744	52.2038	52.4654	51.7294	51.0607	50.6205	50.4143	50.288	50.8128	50.0803	49.7438	49.3659	49.6295	49.4385	49.0367	48.9582	49.0595	49.033	48.8125	49.3925	49.1718	50.0435	47.7013	48.5962	49.6582	51.8225	53.709	55.7804	58.5707	62.3839	66.153	70.1422	74.5109	79.3881	84.5626	90.1018	96.198	101.571	108.405	114.389	120.08	127.032	133.643	140.031	146.251	151.997
	44.0089	44.0414	43.8542	43.6621	44.0015	43.9693	43.719	43.1841	42.7609	42.4	42.2312	41.951	42.2551	42.126	41.6893	42.1138	42.3321	41.7645	41.378	41.8513	41.3646	41.6943	41.655	41.8698	42.3928	40.9092	42.5016	44.1204	46.0064	48.442	50.654	52.7406	55.6867	57.8983	61.3427	63.4833	66.028	68.5672	71.4016	73.7881	77.0952	79.078	81.4115	83.4094	87.059	89.4447	91.9042	94.5262	96.8208
	40.2597	40.4896	40.4096	40.0905	40.7286	40.9475	40.5311	40.1649	39.9231	39.2397	39.2775	39.3097	39.168	39.0474	39.0843	38.9336	39.2882	38.8744	38.7869	39.0425	38.5756	38.6944	38.7227	38.8104	39.5318	37.7644	38.7631	39.782	41.5394	43.3421	44.9101	47.2639	49.1502	51.5147	54.23	56.4244	59.0253	61.9943	64.7246	66.9194	69.7919	72.518	74.5514	76.6215	79.646	81.805	84.5424	87.5024	89.7487
	26.539	26.7578	26.429	26.5483	26.717	26.6701	26.0757	25.5548	25.524	25.2007	24.9715	25.0604	25.6921	25.2997	25.4305	25.1961	25.5255	25.0726	24.5338	25.1176	24.5341	25.1375	24.9605	25.2303	25.8494	24.1519	24.4571	25.0232	25.979	26.9509	28.5769	29.7538	31.9862	33.3319	35.3637	36.967	38.6094	41.2655	43.4967	45.7657	47.9549	50.8384	52.9988	55.9331	58.6591	60.8699	64.2484	66.8996	69.9613
	22.3319	22.2868	22.0836	22.4818	22.3042	22.2499	22.1618	21.7151	21.5818	20.9511	21.1995	21.408	22.0095	21.7599	21.9549	21.7653	21.9361	21.8386	21.4812	21.8516	21.5966	21.4742	21.4569	21.5186	21.8811	20.9247	21.8133	23.2175	24.569	26.1845	28.1494	29.751	32.1205	34.3989	36.8321	38.9762	41.1006	43.7451	46.5929	48.5482	51.2323	53.5789	56.2166	58.7139	61.429	63.8765	66.4633	69.2382	71.748
	53.2912	53.558	53.8799	53.7264	54.7902	54.1117	53.9761	53.0838	52.9034	52.5857	51.4827	52.5364	52.8965	52.9274	51.9426	52.741	52.9872	52.9517	52.0055	52.8802	52.0912	52.6795	52.1417	53.1358	52.4471	53.8812	55.1054	55.7528	58.516	61.354	63.3471	65.5969	69.4882	71.5998	74.7516	77.3871	80.3771	82.7674	86.4728	88.1741	92.1842	94.9933	98.1698	100.771	104.454	107.014	110.08	114.023	117.296
	63.7038	63.4999	63.8665	63.5698	63.4803	63.62	62.7994	62.6976	62.2959	61.7059	61.5622	61.4146	61.2472	61.0688	60.6646	61.0953	61.078	60.3858	60.1112	60.4506	59.8317	60.2926	60.2133	59.7794	61.5104	58.7999	59.5714	60.3732	62.317	63.9121	66.1311	67.8511	70.4743	73.2405	75.7108	78.4804	81.9377	84.5296	87.0008	88.9253	92.2694	95.1895	97.5825	99.4741	102.246	105.09	107.718	109.908	112.505
	56.6674	56.2141	55.3885	56.0833	56.0121	55.5923	55.3054	54.1416	54.2552	54.0542	53.8673	54.6003	55.3029	54.2569	54.6725	54.4165	55.0814	53.9931	53.7978	54.1597	53.3202	53.955	53.983	53.7862	55.3054	52.1149	52.3863	52.7108	53.1889	54.8081	54.9844	56.5864	58.0854	58.2871	60.707	62.4012	64.1715	65.9823	68.4762	70.2462	72.4799	74.7454	76.6303	79.5445	81.3899	83.3993	85.8955	88.8353	91.0214
	80.5145	81.3617	80.3931	80.1969	81.0669	80.8455	80.5189	80.0566	79.2262	79.0864	78.2107	78.9231	80.7989	80.1941	79.6933	80.5231	80.1157	79.3628	79.4039	79.7245	79.492	79.6962	80.0383	80.0611	81.0782	79.9142	81.4921	83.3744	84.7124	87.7012	89.8966	92.4279	95.8154	99.7444	103.461	106.57	110.59	114.328	118.54	122.006	125.16	129.49	132.632	135.964	138.673	142.878	146.171	148.689	152.063
	55.066	55.0103	54.472	54.8421	55.3598	55.2957	55.055	54.9168	54.9779	54.6107	54.5538	54.4485	54.2091	53.8764	53.1321	53.5416	53.6457	53.6358	53.2128	53.5593	53.3407	53.3536	53.4838	52.9332	54.4161	51.4473	52.3629	53.6552	55.4094	57.233	59.283	61.9187	65.2252	68.3028	71.3267	75.1188	78.3611	81.943	85.9424	89.1073	92.8529	96.3361	99.5574	102.597	106.422	110.254	113.892	117.441	120.669
	23.7641	24.3983	23.7322	23.6816	24.1247	23.9111	23.5986	23.2347	23.2436	22.4891	22.8437	22.8891	24.1482	23.1592	23.41	23.4122	23.7328	23.3081	22.9442	23.3925	22.7873	22.63	23.2748	22.9798	23.7493	22.8611	23.7471	24.4469	25.1731	26.4655	28.1868	29.4814	31.7674	33.3517	35.3806	37.1977	39.3121	41.3088	44.0688	45.7513	47.8315	50.0454	51.8893	54.171	56.351	58.0406	60.8274	62.8826	64.8535
	12.5063	12.1196	12.2145	12.4174	12.5491	12.1639	12.4006	12.3392	11.6386	11.3736	11.1845	11.75	11.608	11.4499	10.9623	10.9992	11.6343	11.2031	10.7301	11.2307	11.2054	11.1767	11.0869	11.0751	11.8169	9.242	9.58686	9.90667	10.3356	11.235	11.963	13.4466	14.4782	15.7648	17.5733	19.1269	20.847	22.9525	24.676	27.722	29.2373	32.0153	33.9901	36.6264	39.3067	41.8001	44.6285	47.0792	50.275
	55.5625	55.8946	55.3137	55.1896	55.7946	55.3415	55.4752	55.5739	55.037	54.2958	54.2554	54.1412	55.264	54.9201	54.8761	55.1465	55.0691	55.1034	54.7669	55.0909	54.8396	54.8207	54.6871	54.6961	55.0573	54.6724	56.0657	58.0164	59.7436	61.7273	64.0926	67.2803	71.0834	74.0452	78.0079	81.3407	84.7959	88.9588	93.4774	96.897	101.899	105.409	109.373	112.924	117.796	122.218	126.399	130.442	134.524
	50.4361	50.8785	50.1892	50.8841	50.7297	50.3053	51.5141	51.5819	50.8196	50.8541	50.5898	50.5712	52.0645	52.1206	51.6165	52.2223	52.015	51.8215	51.8886	51.9605	51.0079	51.8517	51.5624	51.8418	52.71	53.2554	53.5097	55.317	56.1064	58.1817	60.1677	61.9117	64.0364	66.0235	68.5542	70.9598	72.6731	75.6152	78.1921	81.6927	83.5746	87.1353	89.5865	91.9821	94.9629	97.7894	100.712	104.454	106.463
	30.5409	33.0913	33.2564	33.2168	32.8959	33.1732	33.0327	32.8446	33.0813	33.195	33.3927	33.2027	33.3662	33.3519	33.3551	32.937	33.0448	33.5823	32.7562	32.3782	32.0305	32.9047	32.5543	31.9201	32.3377	32.7619	34.1995	35.1275	36.2169	37.4667	38.7982	40.3624	42.557	44.2187	47.0915	49.189	50.1221	52.7446	54.8651	57.6198	59.7685	61.7141	64.4716	65.9575	67.9258	70.0947	70.8022	72.4071	74.2711
	32.7857	34.9125	35.1921	35.1758	35.1294	35.1888	34.6784	35.1889	34.8399	35.2472	35.4424	35.2379	35.4642	35.0978	35.5211	34.9091	35.5128	36.327	35.3384	35.3102	34.735	35.865	35.4629	34.7736	35.4662	36.6466	38.1775	39.1788	41.1275	42.5373	43.8897	45.1181	46.7138	48.8238	50.9247	52.6983	53.3588	55.1485	56.9211	59.6637	61.1543	62.9797	64.7613	66.0356	67.3874	69.2596	69.8258	70.141	72.1269
	15.7795	17.7631	18.1163	17.9959	17.9769	18.0554	17.8481	17.5448	17.8097	18.1375	18.3435	18.1194	18.1913	18.3192	18.6004	17.9819	18.7452	18.9726	18.4575	18.2043	17.9484	18.8951	18.7794	18.1981	18.2923	19.7537	21.0861	21.787	23.5123	24.8086	25.6876	27.8325	29.2177	31.2799	34.0167	36.0044	37.7698	39.9873	42.7767	46.0429	48.9017	51.4138	54.3511	56.4282	59.1363	62.6552	63.7581	66.1662	69.6764
	53.3237	55.2301	55.6589	55.5147	55.3854	55.4294	55.0528	54.8544	54.9969	55.286	55.3828	54.9296	55.0886	55.3302	55.3439	54.8026	55.6117	55.8737	55.0249	54.6453	53.6614	55.2769	54.7114	54.0475	54.4087	55.2191	56.5336	57.2962	57.3131	58.691	59.0096	61.1087	62.3674	63.5541	66.2829	69.0002	69.3688	71.8659	73.9211	77.3586	78.7503	81.3123	83.807	85.2863	87.8479	90.4054	91.0391	92.4828	94.6243
	12.7983	14.8355	14.8825	14.8345	14.5954	14.508	14.5928	14.6917	14.7467	15.003	15.2148	14.766	15.306	15.0559	15.2926	14.9282	15.4745	15.3077	15.0374	14.7998	14.0839	15.4179	14.5976	14.2682	14.3429	15.4146	16.2691	16.8975	17.2013	18.3554	18.9447	20.398	22.178	23.5843	25.5269	27.6141	28.9428	30.8494	32.9859	35.5332	37.3867	39.7939	42.1759	43.7838	46.3104	49.0958	50.4083	52.3473	55.1554
	10.2605	12.1739	12.4973	12.3887	12.1822	12.1995	11.9351	12.0993	12.0806	12.2691	12.5373	12.2807	12.2589	12.5936	12.7915	12.281	12.6435	12.7922	12.495	12.3433	11.659	12.9091	12.6897	11.9541	12.1978	13.4689	14.5072	15.3807	16.8329	18.1626	19.1817	21.3772	23.0545	24.9851	27.5309	29.7575	31.7472	33.8836	36.9651	40.1687	42.2019	44.9205	48.6875	50.9156	54.1268	57.2552	59.2691	61.8694	64.9278
	14.725	16.677	16.8135	16.9364	16.8357	16.8953	16.6913	16.7609	17.0687	16.8633	17.1497	16.8455	17.1032	17.2921	17.2816	16.9245	17.2035	17.2425	16.9155	16.6859	16.1725	17.5095	17.1076	16.5022	16.8518	18.081	19.0495	19.9138	20.7853	22.437	23.1688	24.698	26.5382	28.3512	30.4566	32.9171	34.5602	36.7636	39.4765	42.4435	45.1005	47.7537	50.9356	53.6558	56.5461	60.0651	61.9031	64.8607	68.2048
	21.5481	24.0183	23.3386	23.7161	23.4449	23.5204	23.1403	23.5204	23.2465	23.423	23.3751	23.1232	23.7105	23.6767	23.7597	23.2182	23.8273	23.641	23.2024	23.1772	22.3526	23.3022	23.087	22.359	22.7183	22.8213	23.6475	24.3288	24.5367	25.249	26.31	27.1109	27.8811	28.9616	31.077	32.1213	33.4477	34.9639	36.0933	38.312	39.3866	40.9579	42.9738	43.3669	44.6062	46.1517	46.4936	47.1055	48.6451
	38.4126	40.6905	40.61	41.0139	40.8957	40.6631	40.7254	40.9043	40.9019	40.8824	40.9409	40.7276	40.8301	41.2192	41.4242	40.9778	41.2673	40.9835	40.4706	41.0871	42.4512	44.2664	45.7226	46.0488	46.9603	52.1045	53.8256	55.0611	57.3886	59.6655	61.5609	64.0717	66.6459	69.7809	72.6648	74.6595	75.2731	77.704	80.1187	83.0863	85.4567	87.427	90.0941	91.3053	94.1843	96.5859	97.3679	99.7814	102.898
	26.337	28.8679	28.3955	28.3505	28.4543	28.5845	28.3621	28.544	28.8261	28.5407	28.9302	28.6018	28.6169	28.7938	28.8887	28.4703	28.8031	29.0752	28.3646	28.4612	28.2173	29.5916	29.2682	29.1074	29.7418	31.0554	32.0847	33.1351	34.0117	35.7864	36.8517	38.4375	40.5486	42.2383	44.4303	46.6407	48.2889	50.6067	53.2345	56.1411	58.4601	61.1107	63.7874	65.9188	68.4957	71.2604	72.9173	75.0482	78.3723
	15.5866	17.7142	17.6479	17.6661	17.4207	17.6855	17.4724	17.5874	17.7326	17.9157	18.3289	17.6418	17.8234	17.9391	17.9692	17.4993	18.0558	17.8711	17.5429	17.5789	17.2729	18.2177	17.7898	17.7403	17.8545	18.6144	19.2629	20.082	21.1951	22.7741	24.2325	25.9602	28.3924	30.489	33.1027	35.3346	37.4583	40.3808	43.5684	46.8432	49.8686	53.4183	56.6323	59.2063	62.7548	66.0895	68.6337	71.3277	75.0376
	39.1903	41.8887	41.8692	42.1046	41.5212	42.1045	41.5377	41.1587	41.5286	42.09	41.8024	41.9133	41.8788	41.8364	41.9428	41.6165	41.8147	41.7861	41.7651	41.8613	41.436	42.5498	43.0767	42.2135	43.1235	43.9321	45.0917	45.5473	47.0136	47.7768	48.1516	49.5491	51.9211	53.0802	55.4066	57.1043	58.1401	60.703	63.2086	66.9842	68.9772	71.6034	74.6373	76.6279	79.4104	82.951	84.8123	87.3844	90.6409
	23.6662	25.6569	25.8527	25.8013	25.9052	25.5527	25.2168	25.1096	25.121	25.6614	25.6385	25.5293	25.5561	25.5829	26.1042	25.465	25.7107	25.9935	25.4079	24.9173	24.721	25.7249	25.572	24.9894	25.4387	25.6123	27.09	28.5364	30.2889	32.2768	33.34	35.9279	37.7364	39.9997	42.7831	45.2196	46.9363	49.3704	52.2393	55.0251	57.8033	59.8857	62.7006	64.4139	66.5454	69.309	70.7919	72.5019	75.5174
	56.0293	58.1117	58.9914	58.7662	58.5531	58.5958	57.5256	58.2414	58.1056	58.4517	59.4855	58.7586	60.4808	61.4393	61.7263	61.8311	63.2338	63.2955	62.6591	62.6033	62.0953	63.8941	62.9277	62.8672	62.6884	62.1442	63.5285	64.584	65.0536	65.5822	66.4257	68.0335	69.3089	70.4967	73.027	74.8491	76.0031	77.7357	81.054	83.5226	85.1903	86.9343	89.9065	90.8724	93.0419	95.4481	95.8753	96.3088	98.7438
	49.0404	51.4115	51.2025	51.6856	51.5993	51.9418	51.3281	51.0873	51.3413	51.8255	52.3307	51.4609	51.9165	52.0557	51.9393	51.4889	51.8893	52.4417	51.8959	51.7327	51.882	53.0043	53.0154	52.4454	52.6099	54.3972	55.6501	56.9557	58.3718	60.1165	60.6954	62.4662	64.2711	66.0248	69.4324	70.6771	72.5041	74.3712	76.6452	80.3766	82.5473	85.0061	87.5627	88.5133	90.8381	92.8907	93.9041	95.4179	97.3993
	37.8605	38.9666	39.0714	39.3994	38.9989	39.0276	38.726	39.0196	39.1792	38.619	38.7441	38.834	38.3646	38.0529	37.6336	37.8101	37.4728	37.7047	37.3437	37.3076	37.1217	37.1255	36.8133	36.1668	36.3275	36.4908	36.9818	39.0018	40.2574	40.2516	44.2045	46.5288	47.8165	50.2124	51.4269	54.1684	56.5837	58.0237	59.8367	61.5148	63.2135	64.8687	66.7067	68.1013	69.3764	70.4762	71.6496	73.3795	73.9858
	29.11	29.8704	30.0193	30.6393	30.2173	30.1498	30.3499	30.1297	30.2149	29.8245	29.5622	29.2389	29.1476	28.8221	28.5544	28.5468	28.2884	28.3261	27.8845	28.055	28.2736	27.9622	27.8365	27.727	27.0505	28.3606	29.2592	31.5136	33.8122	33.7804	38.5847	41.6888	43.7573	46.7536	48.8233	52.837	55.9713	58.774	61.1655	63.5677	66.5463	69.1251	71.4938	74.4492	77.0024	79.0429	81.4988	84.2422	85.844
	44.1804	45.4188	45.4646	45.6135	45.8699	45.4031	45.8683	45.7486	45.7508	45.6861	45.3725	45.288	45.1247	44.9745	44.8108	44.7118	44.5651	44.61	44.1953	44.4005	44.1207	43.8459	43.7313	43.6914	43.4628	43.9856	45.2295	47.5703	48.8987	48.6173	53.0615	55.3073	56.9214	58.8276	59.7393	62.5136	64.0807	65.0222	66.5574	67.2489	68.4801	69.565	70.7243	71.3545	72.5852	73.1833	73.7411	75.2943	75.0949
	47.5725	49.182	48.6231	49.4544	49.0821	48.9604	48.6485	49.0491	48.8615	48.7872	48.9101	48.3092	47.8598	47.8215	47.8735	47.5747	47.4404	47.797	46.8988	47.3701	47.4413	47.1173	46.9238	46.5216	46.3566	47.3009	48.7617	51.3559	53.5103	54.0493	58.5345	61.7053	63.6111	65.9146	67.1312	70.0281	72.3642	73.8994	75.7186	76.1896	77.2848	79.2243	80.3326	81.3583	82.5191	83.0506	83.4433	85.0279	85.0357
	41.5155	43.1068	42.7754	43.0069	42.8133	42.5521	42.1276	42.1236	42.4974	41.6897	41.9839	41.8883	41.6369	41.2395	41.1684	40.5748	40.6852	40.2684	40.8887	40.5226	40.2517	40.2844	39.9556	39.8572	39.4551	39.9965	40.6264	43.3422	45.5059	45.654	50.7414	53.4878	55.4079	58.4865	60.3186	63.3261	65.9571	67.6181	70.1946	71.4316	73.5886	75.6884	77.5224	79.1053	80.1199	81.524	82.6252	84.5895	84.5535
	56.9064	58.3919	58.0935	58.6286	58.3193	58.3311	57.9197	58.1325	58.6464	58.0753	58.0366	58.2084	57.6602	57.4158	57.1278	57.5948	57.4949	57.433	57.2697	57.0317	57.0022	57.1709	57.1121	57.1032	56.4445	58.4225	59.8462	63.0513	65.3735	65.5707	71.4443	74.887	77.2049	80.363	82.0563	86.533	89.3171	91.4327	93.7101	95.522	97.5491	99.9822	102.19	103.86	105.698	106.952	107.648	109.999	110.514
	33.6237	34.9242	34.6838	35.0038	35.1004	35.0923	34.8627	35.0516	35.1415	34.9021	34.7432	34.7907	34.3645	34.123	33.9827	33.9644	33.6128	33.7538	33.3028	33.596	33.2657	33.3389	32.9849	32.7631	32.5748	32.3143	33.4239	35.5465	37.5236	37.8596	42.3217	45.0094	47.7695	50.6977	52.4646	56.3769	59.0865	61.4186	64.2012	66.1127	68.1751	70.536	73.026	74.7155	76.2717	77.1135	78.537	80.0895	80.8313
	16.8632	17.7706	17.4597	17.8535	17.7471	17.6444	17.598	17.7679	17.7277	17.6366	17.4382	17.2217	17.1311	16.808	16.5726	16.3099	16.1492	16.3349	16.1043	15.9359	15.9005	15.6939	15.3342	15.4459	14.8958	15.9093	17.1221	19.7301	22.0182	22.3435	27.6016	30.8827	34.6311	38.257	41.4491	46.4065	50.3435	53.8805	57.9454	61.8526	65.9932	70.0388	73.8822	77.2359	80.4338	83.9984	87.1182	90.9434	94.3318
	28.457	29.5957	29.4932	30.189	29.7352	29.7378	29.7607	29.7511	29.7292	29.4444	29.3371	29.1916	28.8891	28.7723	28.4496	28.3003	27.9742	28.1282	27.8143	27.7129	27.4004	27.6127	27.22	27.2514	26.707	26.2287	27.1206	28.5211	29.8684	29.9241	33.8954	36.1102	38.3994	40.6849	42.5181	45.8893	48.6182	51.0118	53.4416	55.556	57.5161	60.2121	62.4671	64.7662	66.6132	67.922	69.885	72.0537	73.0923
	50.8423	52.7072	52.0515	53.3042	52.8163	52.5073	52.7201	52.8805	53.2354	52.3696	52.6478	52.2996	52.2886	51.826	51.5665	51.2456	51.5979	51.6533	51.1834	51.6351	51.2522	51.0446	51.064	50.9059	50.4212	51.2957	52.7449	54.817	57.761	58.102	63.6243	67.214	70.0742	73.2105	75.9209	79.7897	84.0733	86.1531	89.3276	91.7963	94.6406	97.492	99.926	102.321	105.217	107.337	109.289	111.449	112.968
	66.3454	67.7935	67.2231	67.9864	67.6675	67.4288	67.497	67.4172	67.5336	67.4686	67.0694	67.2259	66.7277	66.0065	66.1391	66.7259	66.1512	66.3279	65.7032	65.672	65.5626	65.6387	65.1405	65.2159	64.7567	65.5884	66.3414	68.8782	71.1062	71.197	76.52	80.0282	82.4955	85.0438	87.1291	90.6853	93.3889	95.7213	98.6724	100.193	102.665	105.481	107.875	110.017	112.344	114.58	115.841	119.229	119.888
	51.2531	53.1046	53.1727	53.2816	53.5382	53.4154	52.966	52.9372	53.1539	52.5222	53.088	52.7736	52.5595	52.3707	51.7635	52.1749	51.1332	51.548	51.2741	51.3036	51.4004	50.6411	51.2273	50.9903	50.3986	51.5405	52.1045	54.4435	56.6577	56.3444	61.9491	65.3702	69.1783	72.7985	75.3223	80.2234	84.3886	86.9995	90.6772	94.0553	96.9811	100.001	102.91	106.419	108.407	110.634	112.722	115.795	116.915
	18.4937	19.2589	19.524	19.4329	19.57	19.4842	19.3744	19.2408	19.3971	19.4015	19.0854	19.1927	18.8358	18.6933	18.2474	18.219	18.4025	17.8991	17.6961	18.1062	18.1115	17.8178	17.4526	18.0461	17.2102	16.8011	17.8208	18.857	19.8669	19.1562	22.6809	24.2528	25.1745	26.8547	27.7991	29.9775	31.5079	32.306	34.0216	35.4608	36.9311	38.2554	39.9824	41.2691	42.5571	44.2529	45.2994	47.1009	48.6885
	20.6746	21.6137	21.5131	21.9078	21.4378	21.4864	21.2893	21.4961	21.2388	21.1067	21.1302	20.7398	20.8379	20.3249	19.9593	19.8666	19.8413	19.9712	19.541	19.6753	19.7296	19.4245	19.3265	19.235	18.7172	19.1901	19.7985	21.7095	22.8172	22.7108	26.9929	28.9784	30.8851	32.5708	34.3949	37.2108	39.146	41.2017	43.3326	44.6318	46.7516	48.2648	50.4376	51.7158	53.4644	54.9903	56.3479	58.3191	59.5138
	12.0882	12.833	12.8901	13.0751	12.9115	13.1229	12.9981	13.2389	13.0195	12.8425	13.0679	12.8289	12.9716	12.7133	12.4028	12.1213	12.2117	12.5727	12.395	12.4127	12.2188	12.2812	12.4609	12.2607	11.8632	12.3963	13.5768	14.8247	16.1509	15.3742	19.3309	20.7816	22.5559	24.0087	25.1304	27.2441	28.6442	29.7925	31.3587	32.728	33.8591	35.2637	36.3997	37.4123	38.4313	39.3028	40.0398	41.4113	42.0349
IP3R1 shRNA	27.5989	27.7581	27.9953	27.8942	27.4424	26.6664	26.0176	25.5977	24.8074	24.9134	24.2534	23.9589	23.8631	24.3117	24.607	25.3195	26.0883	26.5338	26.5765	26.9051	26.6997	26.5336	26.0583	26.1026	25.4805	26.6314	26.2518	26.4889	26.6007	26.7311	26.0486	25.6423	25.4925	25.2602	25.2684	25.3639	25.542	26.1075	26.2518	26.5462	27.0413	27.7811	29.1631	29.7327	30.1254	30.1777	29.0501	28.4744	28.1244
	26.5857	26.6549	26.4853	26.2302	25.5644	24.8785	23.9852	23.3919	22.5299	22.7624	21.9275	21.6913	21.7159	22.034	22.2727	23.5413	23.8516	24.5701	24.3511	24.8319	24.7052	24.212	23.806	24.1358	23.6223	24.6591	24.7833	25.2389	25.8826	26.8913	27.1465	27.4978	27.9708	28.1183	29.1786	30.1452	31.1415	32.2862	33.5115	34.5542	35.6296	37.4292	39.715	41.3931	41.9649	42.6175	41.9654	41.6214	41.649
	63.0967	62.5908	62.7976	62.7384	61.0941	60.2512	58.9818	58.708	57.2713	57.1608	56.0579	55.6984	56.2051	55.7894	55.673	56.2681	56.5661	57.5137	56.8799	57.776	57.1298	56.5091	56.1418	56.4453	54.8851	54.786	55.2073	55.0669	54.5098	55.2522	54.9397	55.2838	55.2333	55.174	55.1192	55.4	56.2214	57.1678	57.5806	58.1167	58.7246	59.9404	61.3955	62.201	62.3002	62.8778	61.4228	61.5486	60.7321
	26.992	27.1957	26.939	27.1777	26.3434	26.0875	25.3323	25.0688	24.3234	24.262	23.7999	23.6605	23.9871	23.8192	24.4602	25.1911	25.5738	26.1327	25.9718	26.6522	26.2523	26.0176	26.0273	25.9654	25.588	25.5083	25.6016	26.2119	26.5943	27.7487	28.1265	29.1611	30.2699	31.1828	32.494	33.8846	35.3275	37.1227	38.7506	40.3585	41.8755	44.4075	46.5441	48.3322	50.0594	50.8813	50.5554	50.6948	51.1651
	33.6289	33.9556	33.9099	34.0659	33.2378	33.0323	32.2888	31.9057	31.0318	31.3258	30.5851	30.6778	30.8868	30.9852	31.3909	32.4166	32.7447	33.6454	33.5295	34.3672	33.8239	33.553	33.186	33.808	33.0853	33.069	33.5999	34.1322	34.8648	36.3626	36.526	37.7028	38.87	39.6301	41.1867	42.6153	44.3109	46.3662	47.9074	49.4593	51.3073	54.0074	56.1695	58.1286	59.2095	60.851	60.3015	60.2885	60.2945
	63.9223	63.5747	63.0041	62.7236	61.2049	60.7001	59.2908	58.5257	57.1541	56.8431	55.7685	55.3329	55.2117	55.2025	54.8461	55.8261	56.0045	56.2809	56.0208	56.2517	55.707	55.357	54.5629	54.3114	53.439	53.7393	53.9237	54.7026	55.2885	56.3357	56.8806	57.7805	58.6188	58.9375	59.9179	61.1973	62.4912	64.0044	65.2409	66.0817	67.7842	69.9404	72.1278	73.4551	74.7196	75.6887	74.654	74.4801	74.4657
	31.4943	31.4548	31.2205	31.648	30.8126	30.8028	30.0383	29.5197	28.6876	29.1859	28.5938	28.2945	28.3567	28.4557	28.7137	29.8241	30.2137	30.9787	30.3486	30.7812	30.6567	31.0134	30.394	30.9556	30.1564	30.0025	30.2678	30.6571	30.6354	31.7214	31.9492	32.6286	33.3125	34.1857	35.4687	36.2888	37.9635	40.2092	41.1155	42.4	44.3697	45.926	48.7596	49.7979	51.5754	52.2509	51.9392	52.0586	52.3627
	24.0657	23.6832	22.8845	23.4878	22.5762	21.8401	21.0662	20.4596	19.6379	19.4825	19.0142	19.6461	20.0632	19.5769	20.0893	21.3527	21.6111	22.4555	21.6731	23.1912	22.3538	21.8145	21.8637	22.2833	21.2273	21.5231	21.257	22.8711	22.4418	23.7887	23.2592	24.3062	25.0382	24.6655	25.7945	26.3648	27.7032	28.9522	29.4936	30.6081	31.468	33.8873	35.4181	36.4601	37.1088	37.9577	36.4276	36.1098	35.8847
	17.0015	16.9369	17.0928	17.6678	16.4717	16.0282	15.0818	14.4346	13.4303	13.6068	13.0799	12.2749	12.312	12.7625	12.6107	13.8961	14.1245	15.0513	14.5576	15.4899	14.9366	14.8098	14.0836	14.8613	13.6521	13.8305	14.099	14.7906	14.8674	16.0998	15.677	16.5912	16.6233	16.8221	17.4699	18.0607	18.7523	20.3487	21.0068	21.7117	22.5674	24.4713	25.9651	26.8055	27.6928	28.3008	27.1998	26.5635	26.2841
	68.715	68.4783	66.4476	66.4821	64.5369	63.2651	62.1343	60.5246	59.2148	59.0089	58.176	58.2557	58.1729	58.3236	58.2067	59.2987	59.4635	60.1667	58.9675	60.065	58.9988	58.6211	58.0453	58.1689	56.9374	58.1983	59.4205	62.5907	63.2568	66.0297	66.6124	68.5006	69.7532	70.1169	71.4054	72.0065	73.0844	75.2282	75.423	76.548	76.4411	78.8355	80.9875	81.5028	82.0047	82.3012	80.1146	78.9752	77.8469
	50.5326	50.8967	52.1282	52.3922	53.3485	53.9184	53.9757	54.2866	54.0455	54.0063	52.9034	52.8923	50.9324	49.8314	49.965	49.7422	50.8026	50.4735	51.2543	51.9031	53.047	53.0494	52.936	51.922	53.3304	60.0452	64.1509	66.8578	72.3919	75.5093	79.2806	84.433	88.0148	93.4859	98.1168	101.494	107.369	112.722	119.679	125.681	133.386	139.245	145.148	150.898	156.385	161.876	165.903	169.904	174.091
	34.5964	34.9451	35.6271	36.2253	35.6729	36.1061	36.2566	36.3801	36.2911	35.9733	35.2342	34.491	32.9262	32.2208	31.8297	32.6289	32.4333	32.4897	33.0781	33.4215	34.4591	34.4698	34.5627	33.9078	34.7139	36.2109	38.5362	39.5405	43.4775	45.0523	46.7811	49.562	50.5421	52.9654	55.6505	56.9325	60.0092	62.2454	65.8138	69.8518	74.3565	77.7238	80.9841	84.4005	86.9255	89.9253	92.8814	94.939	97.9012
	46.3275	46.7121	47.6485	48.2875	49.6662	50.0349	49.9948	50.2956	50.5082	49.9432	49.3108	48.2778	46.4646	45.776	45.3265	46.0844	45.971	46.5974	47.5309	47.4471	48.7131	48.7943	48.4816	47.9048	49.1825	56.5983	61.5694	64.6616	70.9607	75.138	78.8422	84.779	88.4573	94.1164	99.4943	102.874	108.903	114.801	120.857	128.032	135.782	142.752	148.978	155.772	160.256	166.017	170.304	174.775	179.075
	42.5731	43.1647	44.1727	44.3364	46.8672	47.0607	47.115	47.4432	47.4076	47.3386	46.4667	45.5603	43.8889	43.2633	42.9151	43.5138	43.6329	43.7074	44.3176	44.9511	45.9895	45.921	46.0258	45.0502	45.7994	53.8509	58.2727	62.0913	68.3075	73.0205	77.472	83.1922	87.3771	93.2713	99.1875	103.076	109.439	115.75	122.638	130.325	138.846	146.45	152.35	158.933	165.322	171.257	177.445	181.541	186.096
	39.985	40.6811	41.5199	42.3331	37.2557	39.4321	39.1555	39.0235	39.1432	39.5305	38.7663	37.6876	36.3208	34.4094	34.3294	34.0748	35.1052	35.8194	36.9232	37.702	38.4348	38.9587	39.5207	37.9245	39.4611	51.5883	57.376	60.225	71.8791	77.3391	80.7575	89.8862	92.8126	101.954	104.587	107.402	115.618	121.446	128.585	134.842	141.735	148.132	156.062	160.539	166.024	171.881	174.246	178.954	182.813
	43.5626	43.7267	45.0474	45.3009	48.0427	48.2687	48.4788	48.3978	48.7101	48.4514	47.6355	46.7199	44.892	44.3741	44.0719	44.3884	44.921	44.7759	45.591	45.7315	47.0264	47.0757	47.1327	46.4027	47.4635	50.553	53.9835	55.7321	59.6301	61.7977	64.0085	68.219	69.6101	73.4196	76.5819	78.6391	83.0444	86.7818	91.4345	96.5685	101.918	106.731	110.858	115.744	119.215	123.483	126.99	130.757	134.345
	49.4415	49.8054	50.7603	51.4114	53.132	53.4157	53.5084	53.5321	54.0614	53.3818	52.6828	52.1914	50.3507	49.4261	49.4947	50.07	50.1705	50.3506	50.9894	51.6246	52.5656	52.5557	52.4218	51.7951	53.0878	66.2979	73.8703	80.8297	91.1217	99.9559	108.912	119.504	129.333	141.266	152.923	162.524	174.535	186.753	199.771	212.199	225.877	236.827	247.513	256.575	263.345	270.919	275.709	279.271	282.523
	41.7819	42.2741	43.1807	43.4326	45.3929	45.7491	45.723	45.5685	45.6539	45.3536	44.8833	44.0178	42.1222	41.4876	41.2126	41.5177	42.2472	42.2792	42.8073	43.3473	44.0354	44.2756	44.4338	43.705	44.8892	49.8493	53.4398	56.0565	60.8363	64.1635	67.2739	72.3852	75.149	79.6598	83.8207	87.4426	92.2829	97.0183	102.904	108.463	115.756	121.188	126.404	131.932	136.515	141.165	145.735	149.831	153.869
	22.7794	22.498	23.8627	23.9704	26.2306	26.3714	26.6891	26.8848	26.5865	26.5665	25.6617	25.5643	23.3898	22.574	22.7778	22.7853	23.2911	23.305	23.7634	24.1319	25.2685	25.2106	25.3136	24.9121	25.3294	26.2826	27.6406	28.8436	30.9203	31.676	32.9063	34.9117	36.108	38.0758	39.8201	41.46	43.7025	45.5164	48.8924	52.063	55.8832	59.1413	61.5195	64.7399	67.1646	70.1354	72.4506	74.4398	77.196
Time (s)	0	2	4	6	8	10	12	14	16	18	20	22	24	26	28	30	32	34	36	38	40	42	44	46	48	50	52	54	56	58	60	62	64	66	68	70	72	74	76	78	80	82	84	86	88	90	92	94	96
[truncated: 276 more columns]

## Sheet: Figure 6D-6F
IP3R1 shRNA+E-Syt1+siNS	30.6891	31.412	30.8292	29.4856	30.8911	31.0776	29.9495	29.5446	30.0974	30.0626	30.1345	29.9731	29.3008	29.7305	28.9286	28.5331	28.5023	28.7363	28.0768	27.723	26.6828	26.1605	26.3262	26.196	26.8798	39.1341	40.7319	41.9205	44.2802	45.8505	47.2251	47.8972	49.7249	51.6221	52.4413	53.6101	54.4125	55.6593	56.522	57.535	58.8475	58.8423	60.1323	59.8954	60.4343	61.1674	61.1934	61.01	60.4046
	41.9403	43.6855	43.3159	42.3981	43.5698	44.6291	44.3186	44.5559	44.7308	44.6786	44.7583	44.2726	44.3732	45.7208	44.2038	44.3535	44.477	44.8293	44.4163	44.0346	42.9773	43.5019	42.4788	43.2282	44.2754	67.4362	71.5223	75.3632	79.5798	84.0789	88.6305	92.0768	96.565	100.721	104.368	108.174	111.963	115.856	118.489	122.884	125.261	128.401	131.852	134.294	137.288	140.545	141.645	143.157	143.928
	18.1384	18.8359	18.6546	17.8556	18.8269	19.4313	19.0447	19.3449	19.5137	19.6324	19.6533	19.7489	19.6859	20.3187	19.0698	18.7841	18.9985	18.6746	17.9657	17.5622	16.9195	16.6785	16.5101	16.4079	16.8152	29.481	31.1387	32.6272	34.2478	36.4758	38.3908	39.5273	41.5729	43.1519	44.7886	46.7216	48.2747	50.4112	51.7667	53.6237	54.9266	56.4722	57.5425	60.2341	61.1767	62.8025	63.7181	64.6115	65.6859
	28.4546	29.978	30.0199	28.8702	31.0945	31.1615	30.4469	30.667	31.6155	31.554	30.8938	30.0207	30.0983	31.1255	29.4635	28.9947	29.9337	30.1997	29.6012	28.8982	27.9943	28.7813	29.1664	28.7818	29.5615	61.4318	66.713	69.196	74.2089	78.548	81.5336	84.7262	88.4392	92.8208	95.3181	98.6328	101.409	104.628	108.177	110.23	114.096	115.499	119.035	120.829	121.795	126.21	124.559	126.434	123.982
	26.5483	27.062	27.6401	25.8842	28.3721	28.1351	27.8558	27.8156	27.9848	27.4968	27.722	27.6043	27.8277	28.7589	27.4029	27.1615	27.5021	28.0784	27.4203	26.8567	25.5471	26.2688	25.5167	25.4025	27.3462	48.8375	51.7571	55.4517	58.4738	62.2086	65.4941	68.956	71.5415	74.3499	77.3252	80.0093	82.2715	84.9346	86.2416	89.6406	91.4343	93.1437	95.457	96.6365	98.619	101.654	101.222	101.72	101.591
	39.3116	40.4695	40.7054	38.7452	40.8389	40.6403	40.0923	40.2908	40.7386	40.2365	40.5642	40.3606	40.4345	41.3685	39.9767	40.0092	40.5177	40.7068	39.7559	39.4636	37.6054	38.466	37.8058	38.0401	39.5765	63.0542	64.9064	68.5767	72.9283	75.6677	77.874	82.4765	85.1558	88.2533	91.4595	93.652	95.7322	98.8859	100.965	104.364	107.168	109.198	111.428	114.073	115.97	118.024	119.131	119.894	120.315
	56.9791	56.3864	57.7722	59.3292	60.4872	59.9187	55.7408	60.1812	60.0604	59.196	58.1502	57.3268	56.1708	55.9797	56.1798	55.7548	57.727	58.9445	60.0351	60.4187	59.9289	59.2071	58.0063	56.5791	55.5846	28.8825	29.0496	29.3323	30.2838	32.4792	34.4999	38.7465	40.3299	44.0765	45.6277	47.512	48.9516	50.3187	52.0828	54.6589	56.9538	60.8744	64.0964	67.5605	69.917	72.2906	73.1198	73.66	74.3808
	13.0613	12.9667	13.8734	14.8489	15.3892	15.319	12.2491	16.2486	15.7206	15.4578	14.4706	13.4114	12.3206	12.5006	13.0256	13.4983	14.3393	14.751	15.6149	15.9149	15.4617	14.9048	13.2727	12.5464	11.8963	12.9574	12.1434	13.7011	14.2774	16.3046	19.4004	22.7318	23.6682	27.9976	29.6115	31.2068	32.7447	34.9419	36.9756	39.44	42.1137	46.1693	49.3148	52.422	55.3735	57.6375	58.5835	58.9548	59.8492
	13.0771	12.9538	14.1577	15.0853	15.1582	15.6458	12.4401	16.0141	15.6732	15.1978	14.756	13.6206	12.6908	12.582	12.661	13.4911	14.1836	15.4692	16.0573	16.3902	16.1309	15.7675	14.452	13.3765	12.9776	15.5093	14.9538	17.1629	16.8108	18.2014	21.1355	24.0531	24.6065	28.0454	29.1412	29.6511	30.3166	31.2021	32.7922	34.5378	36.215	38.8168	41.5238	43.6833	46.2688	47.5451	47.8845	47.4116	47.3006
	40.9958	40.8148	42.0167	42.7748	43.3644	43.8073	40.1418	44.2067	44.5255	43.7809	42.5143	42.0182	40.87	40.4467	40.3267	41.1062	42.4214	43.4988	45.0488	45.1408	44.9477	43.4372	43.1773	42.5689	41.9805	47.0153	47.0369	49.0137	51.3618	53.7691	57.7612	63.0569	64.2478	69.4418	71.5404	73.5446	75.7833	77.984	79.694	82.107	85.219	88.7284	93.1421	95.8914	98.4448	100.562	102.094	100.96	101.799
	12.4909	12.1408	13.0201	14.3505	14.6358	14.6824	10.9804	15.1036	14.4949	14.2385	12.9569	12.4658	11.5056	11.6138	11.5643	11.7167	13.0484	14.1167	14.7362	14.9824	14.4635	14.1388	12.8319	11.5384	11.2767	13.0421	12.2468	13.7199	13.8905	16.0475	18.8829	21.5366	22.4365	26.7913	28.4022	29.6884	30.8761	33.787	35.4899	37.7386	40.9493	44.7909	47.7655	51.8619	54.2803	56.2462	58.042	58.6232	59.3062
	25.5096	24.8437	26.3214	27.7589	27.9453	27.0564	24.614	27.9999	28.2311	27.2396	26.6155	25.3042	25.0238	24.0905	24.9925	25.5876	26.5836	27.7514	28.384	28.5265	27.8828	27.7163	25.7633	25.2331	24.5229	26.0942	25.5919	26.6729	26.8351	28.9297	32.4218	34.5487	36.1101	40.6124	41.4427	43.2136	44.9352	47.1378	48.8354	51.5764	54.2821	57.7667	60.8966	64.441	68.4449	70.5264	71.5132	72.2663	72.6009
	45.7937	45.3417	46.8299	48.0317	49.0983	48.0606	45.392	49.1847	49.0642	48.0423	47.9669	47.0838	45.7467	45.6134	45.4357	46.2067	47.2906	48.6009	49.4524	50.0501	49.0901	49.2408	47.4039	46.4168	45.8366	48.8576	49.4639	52.5397	53.9115	58.6098	64.2759	71.0225	73.9346	81.8301	85.7382	89.8539	93.6277	99.177	101.994	107.857	113.278	120.396	125.439	132.736	138.493	141.352	145.407	146.518	148.513
	28.5634	28.3796	29.0853	30.9473	31.7732	31.434	28.7247	32.759	32.5714	31.8316	31.6527	30.072	28.9769	29.0636	28.9396	29.9578	31.1245	32.2914	33.0866	33.1938	33.4467	33.0088	31.672	30.5412	29.7295	33.0282	33.25	35.6168	38.0718	41.4778	46.8089	53.3521	56.3187	63.6118	67.9398	71.7012	76.222	79.6635	84.1654	89.9161	95.446	100.825	106.765	112.913	118.972	122.864	125.028	126.969	128.013
	17.0586	16.9669	17.9154	19.0009	19.5424	19.2332	15.8254	19.6082	19.3632	18.8988	18.157	17.1232	16.2243	16.2037	15.8074	16.5681	17.654	18.9044	19.481	19.4336	19.7466	18.8745	17.755	16.8172	15.6688	18.685	18.1862	20.3238	21.3562	23.9596	28.0485	32.0968	33.4526	38.5309	41.2322	43.4324	44.9991	48.0631	51.0111	54.2187	58.2481	62.4733	67.0665	71.6462	75.5915	79.106	81.2448	82.3043	83.4228
	19.4082	19.4699	21.1718	21.7805	22.8205	22.1684	19.6191	23.2204	23.1108	22.3496	21.6963	20.6919	19.5959	19.995	20.1397	20.6313	21.2196	22.7315	23.4107	24.2003	23.4946	22.9103	21.7577	20.8202	20.053	22.961	23.4774	25.3276	25.946	28.4415	32.3181	36.612	38.5358	42.6937	45.1092	47.5514	49.9152	52.6049	54.467	58.253	61.6556	65.9228	70.0327	74.5141	78.3382	81.2737	83.1757	84.638	85.0959
	37.522	36.6176	38.2401	39.3189	40.0163	39.5249	36.2326	40.2084	39.789	39.7669	38.6166	37.6255	36.8399	36.9064	36.8614	37.1393	38.579	39.6744	40.4308	41.4565	40.6608	40.2592	38.9824	37.7467	37.0296	40.3275	40.568	43.8659	45.1083	48.8385	54.1186	59.2371	60.689	66.7476	68.8694	70.5109	72.263	75.6061	76.9684	80.1333	82.4243	86.6154	89.3955	91.7027	95.0313	96.6764	97.1046	96.2141	95.4009
	40.8515	40.6816	42.0702	43.1183	44.2948	44.4121	41.0531	44.3678	44.6026	43.2305	43.1004	42.1793	40.7905	40.3696	40.6959	41.2623	43.1411	44.2419	45.1696	45.2528	45.2932	44.4794	43.3266	41.9934	40.949	44.1126	43.9253	44.6406	49.5507	52.3251	58.7041	64.1295	66.5392	73.6701	74.6519	76.9696	79.5636	82.9695	84.5123	86.9915	91.6985	94.8301	98.4791	101.162	103.463	106.418	107.046	107.321	106.479
	35.9983	35.86	36.6001	38.0339	38.6915	38.933	35.8548	39.4429	39.1763	38.3235	37.9353	37.2058	35.4502	35.2887	35.3809	35.9878	37.0531	37.8884	38.8102	39.0736	38.5672	38.0372	37.0976	36.1059	35.6027	38.7585	38.6186	40.8093	44.3703	48.477	54.0829	60.5271	64.1746	71.1258	76.0034	80.3223	84.2674	89.4649	93.5615	100.103	105.96	112.674	118.823	125.748	130.616	134.316	137	138.377	140.106
	20.0286	20.3104	21.0498	22.2436	22.9722	23.0298	19.612	23.5886	24.0609	23.2352	22.1969	21.6998	20.419	20.3107	19.9982	20.9105	21.8368	22.6231	23.5368	23.3934	23.4229	22.6709	21.3604	20.4073	20.207	22.3414	21.3012	21.1013	22.1312	24.596	27.0425	30.3665	31.8756	35.8771	37.8389	39.7505	41.1583	43.954	46.2563	49.3084	53.4197	57.0315	61.3511	66.0478	70.0736	72.8788	75.283	75.944	77.5967
	26.6615	26.2092	28.053	28.5442	29.9405	29.1744	26.3362	29.7866	30.1019	29.4323	28.8807	28.3744	26.4159	26.2601	26.6969	27.1389	27.8884	29.2409	29.8651	30.5569	30.3425	29.2631	27.8373	27.3815	26.5693	30.0248	30.3647	31.232	33.7146	37.3802	42.5028	47.9414	50.4173	57.3319	60.6339	64.0316	67.4006	71.7361	75.8323	81.0259	85.9889	91.6967	97.1541	102.808	107.208	110.821	112.742	114.406	115.083
	31.8652	31.8253	31.6004	30.7614	31.0654	31.5535	31.9855	31.4533	31.8028	31.358	31.3464	31.6222	32.3538	32.7467	32.9701	34.6564	34.793	33.4688	34.2801	33.0694	31.8282	31.4342	32.161	33.3455	34.2536	33.6968	35.1415	37.2918	38.4113	37.6814	37.8811	38.4994	38.8463	43.3398	45.4586	49.8186	56.7699	57.9326	58.3072	60.4853	61.0943	63.8421	67.4272	71.294	74.6991	77.0378	79.5358	81.392	83.7447
	23.6854	23.9509	24.3668	23.8818	24.4325	24.1918	24.965	25.0136	24.428	24.5798	24.3924	24.5605	25.0675	25.7392	25.3125	26.7361	26.5739	26.6574	27.0141	25.6854	24.5335	23.6068	24.9497	25.6052	26.8642	26.1317	27.8394	28.7772	30.1034	32.1901	32.1069	32.4486	32.8434	36.2504	38.2789	41.5815	44.1536	44.9737	46.2635	46.4486	47.2635	50.1678	53.078	56.5366	58.6364	60.9283	62.2717	64.0172	65.5198
	37.4091	37.1385	37.4842	37.5258	37.1215	37.2078	37.8416	36.6797	37.9749	36.6686	37.258	37.7339	37.2134	38.4447	40.1419	39.5386	41.1082	40.3709	40.6387	39.5686	36.9883	37.3816	37.1008	38.3047	38.3777	37.3614	37.2629	39.0245	40.0575	45.5608	45.5394	45.8917	46.2539	49.9244	50.8823	55.0566	57.1789	59.2824	58.131	58.1799	60.0115	60.5904	65.7801	67.5436	71.9703	72.1818	73.2478	75.6231	75.9567
	47.5418	46.9664	46.5884	46.6058	46.4503	46.4439	47.1759	46.9022	46.6804	46.6534	46.6743	47.2369	47.3499	48.2556	48.6482	50.0762	50.4732	50.012	50.2235	49.3346	48.0817	47.3022	47.8406	48.658	50.0941	48.9482	50.1993	52.1157	52.7503	57.2233	57.1067	57.54	58.21	62.6529	64.7304	69.5374	72.9054	75.0519	77.1172	79.0022	81.8302	86.357	91.8044	97.2687	102.175	105.832	110.105	114.152	117.479
	66.2606	66.001	64.2758	64.0139	65.1655	64.3276	65.9956	63.8764	60.3466	65.533	63.6453	64.5949	64.2944	65.1657	65.6838	66.7648	67.2489	67.0323	67.0311	65.7898	64.1235	63.4443	64.3282	64.6598	67.129	66.1254	68.6892	71.2642	73.1707	78.1261	78.3367	81.3059	83.6227	89.5502	92.6012	98.5825	102.354	106.131	108.841	111.846	116.125	120.856	128.096	135.152	141.491	146.395	149.639	153.059	156.86
	49.4765	49.832	49.4628	49.0385	48.628	49.2073	49.8324	49.5407	49.8769	49.8911	49.5396	50.0305	50.4874	50.7704	51.3341	53.1141	53.028	52.8313	52.1822	51.3598	49.5867	49.1505	49.8777	51.087	52.3464	50.9846	52.6055	54.2288	55.883	58.5492	58.8574	60.101	61.4911	65.8216	68.7822	73.4347	76.3343	78.4412	79.5111	81.5055	83.6349	86.972	91.0315	96.1556	100.515	103.185	106.53	109.431	111.586
	41.1374	39.5514	39.8566	39.2997	38.9752	39.7817	39.9147	39.2394	39.836	39.8635	39.8076	40.145	40.6372	40.5221	41.0426	42.2247	43.2877	42.216	42.1942	41.4592	39.7215	38.5135	40.2803	41.2499	42.1671	41.5573	42.7054	44.5323	47.1512	47.6902	48.1564	49.3834	50.957	56.0712	57.2618	62.6243	64.3461	66.8306	67.6	68.4908	71.0539	73.2108	77.5329	80.7453	84.5816	86.0083	88.5196	91.4098	92.6987
	38.4852	38.3221	38.2025	37.7565	37.944	38.0546	39.1208	38.4084	38.1103	38.2558	38.3993	39.0225	39.0417	39.7571	40.0808	41.3321	41.8719	41.1478	41.0565	39.9072	38.6536	38.0115	38.698	39.7207	41.2978	39.7075	42.0831	43.4311	45.5238	49.2758	50.7259	51.6606	53.1599	57.628	60.5312	65.1278	69.2024	70.8107	73.0536	74.2952	77.146	80.3419	85.3549	89.9489	93.9642	96.4908	98.3454	101.798	103.348
	35.7481	35.6722	35.6187	35.1639	35.0582	35.3628	36.2627	35.8533	36.0377	35.5798	36.0229	36.0381	35.7567	36.3866	37.094	38.1291	38.0027	37.9524	37.678	36.9898	35.2364	34.7754	35.8428	36.44	37.5698	36.3366	38.4764	39.931	41.624	42.3006	42.718	43.8153	44.4107	48.66	50.6141	54.8649	57.9861	60.226	61.4011	62.2215	64.1976	67.9224	71.4914	75.8857	79.1708	81.3513	84.0232	86.3725	87.8763
	30.0057	29.642	29.3516	29.2034	28.7756	29.1551	29.9869	29.594	29.58	29.7217	29.7929	29.7535	29.9955	30.434	30.383	31.7298	31.8449	31.6624	31.6154	30.8684	29.5845	28.9655	29.9983	31.2765	32.0935	31.3174	33.5705	34.7909	37.1522	38.5917	39.313	40.0007	41.1181	44.9283	46.842	50.2722	52.5139	54.0002	54.3485	54.548	55.8178	58.1802	61.1329	64.2586	66.9761	68.2573	69.4094	70.578	71.3321
	31.8067	31.8516	31.177	30.7564	30.7401	31.4577	32.2146	32.0232	31.9793	32.0558	31.8384	31.9949	32.1149	32.4447	32.6629	34.0847	34.4855	33.7189	33.5481	32.7438	31.3554	30.7325	31.7668	32.6057	33.9419	32.6078	34.2341	36.4661	38.4295	39.2753	40.1041	40.6526	41.6511	45.2951	47.1183	50.5783	52.8531	53.6888	53.8256	53.7462	54.7446	56.5216	59.6768	61.8539	63.8828	64.8566	65.6955	66.519	67.0647
IP3R1 shRNA+E-Syt1+siSTIM1	39.7799	39.6051	40.2707	40.1768	41.7806	41.3269	41.7697	41.6645	45.406	46.17	47.0213	46.5658	46.9081	47.4136	47.2761	48.0426	48.7331	48.1972	48.9406	48.9716	47.7567	49.2897	48.4263	48.8844	48.6281	45.5494	45.9437	46.687	47.398	49.0449	51.2437	52.2049	53.7977	55.6453	56.9135	58.3824	59.616	61.2153	63.2767	64.6574	66.1434	67.3333	68.7379	68.9352	71.1326	72.143	74.1385	75.6584	76.8837
	24.2282	23.8039	24.2596	24.1626	25.1769	24.5826	24.8411	24.7381	26.4393	26.8484	27.4112	26.4513	27.0229	27.1854	27.5261	28.227	29.1099	28.8979	28.9255	29.8089	27.8391	29.1587	29.2741	29.4872	29.5831	27.5064	27.7787	27.8468	27.878	27.9285	28.6541	29.3701	29.9819	30.8383	31.6974	32.6697	33.3944	34.8364	36.2623	37.292	38.677	39.8248	41.0064	42.0935	43.1271	44.4954	46.4154	47.9143	48.9643
	25.277	25.009	25.378	25.1688	26.3317	25.6997	25.485	26.0568	28.0052	28.4461	28.7461	28.862	28.8613	29.1886	29.1283	29.5303	29.9176	30.6805	30.9445	31.0485	29.589	30.6645	30.4226	30.8801	30.8234	29.0593	28.9719	28.6763	28.756	29.0419	29.9839	30.8371	31.2466	31.3328	31.9044	32.8765	33.125	34.1995	35.0121	36.2307	36.7352	37.3192	38.1303	39.1574	39.9805	41.3227	42.3097	43.3544	44.8858
	25.3105	24.7672	25.5536	25.1249	26.1706	25.7989	25.2619	25.9083	25.7649	26.476	26.6627	26.5186	26.5419	26.9322	28.2232	27.8526	28.5264	28.184	28.4213	29.0511	27.4065	28.1441	28.3954	28.712	28.6836	26.1449	26.0797	25.6766	25.8471	25.9852	26.0262	26.3278	27.0147	27.0826	27.4797	28.948	28.9089	29.5103	30.7132	32.0423	32.6947	33.5123	34.394	35.4908	36.0846	37.3566	38.5778	39.6719	41.2467
	22.8557	23.0667	23.6303	23.7181	24.7455	24.8454	25.171	25.2357	25.6546	27.5716	26.9754	27.3798	27.6651	28.3757	29.6913	28.2768	28.5345	29.2831	29.2119	30.2362	28.6903	29.6867	29.0077	29.3127	29.2522	26.0059	26.2236	26.7788	25.777	26.1406	26.0583	26.936	27.1803	26.8039	27.7566	28.4714	28.2388	29.0633	30.0159	31.1757	31.3059	32.2718	32.8961	33.6986	34.899	35.2176	36.2496	36.9892	38.3897
	24.4998	24.1008	24.7121	24.419	25.4824	25.0214	24.9089	24.5056	24.4347	25.2789	25.669	25.3162	25.1554	25.597	25.6888	25.7986	25.9958	26.5953	26.3898	26.5687	24.8966	25.7075	25.7872	25.8302	26.0201	24.6683	24.8492	24.4664	24.7216	24.9629	24.8245	25.4583	26.0447	26.1337	27.3195	27.988	28.9068	29.8587	31.5085	32.9957	34.3973	35.0548	35.5069	37.1292	38.031	39.6864	40.7025	41.8473	43.7501
	15.3701	14.8397	15.2977	14.9183	16.0958	15.4112	15.4782	15.2564	16.0865	16.0354	16.8619	16.6624	16.4785	16.5341	17.114	16.7091	17.3171	17.0767	17.5331	17.7821	16.3623	17.1129	17.1097	17.2586	16.7427	15.7698	15.656	15.6547	15.3149	15.5818	15.6789	16.1967	16.1832	16.4348	16.7058	17.1453	17.4535	17.7705	18.2844	19.6415	20.6012	20.1273	20.4653	20.7269	21.4544	22.262	22.3979	23.6044	24.1185
	12.8491	12.7104	13.3421	13.4801	14.5243	13.6022	14.1552	14.3152	14.006	14.414	15.0504	14.9665	15.1949	14.9929	15.4656	15.8278	16.2134	16.6424	16.1652	16.9928	15.2593	16.4759	16.3842	16.4314	16.6915	15.3452	15.3789	15.7027	15.5935	15.9838	15.8528	16.5261	16.8949	17.6584	18.5601	18.7332	19.1431	20.7583	21.7	23.0579	23.4463	24.3118	25.2808	25.801	26.9182	28.4129	29.298	30.2631	31.9803
	43.3192	42.9341	44.0057	43.9588	45.2751	43.9427	44.9393	44.2071	44.531	45.0293	45.5493	45.4437	45.6032	45.7707	45.7494	46.4095	46.6811	46.6159	47.1518	47.7142	45.8725	47.0026	46.89	46.9453	46.764	44.5646	44.7481	44.6411	44.0719	44.3156	44.0083	44.5333	45.3107	45.7173	46.0244	47.3001	47.2008	48.4897	50.4103	51.3953	52.8991	53.1126	53.3943	54.3785	55.1381	56.7107	58.5502	58.7096	60.5749
	21.9734	21.9555	22.9083	22.6606	24.7902	24.4321	24.712	25.3705	26.0762	27.1212	27.4309	27.2302	27.6315	27.872	29.3952	28.3261	29.0095	29.2199	29.3976	29.9457	28.2043	29.3364	29.3888	29.7706	28.9998	26.6286	26.1995	26.1045	26.0892	26.2762	26.1353	26.3565	26.7289	26.3863	26.6175	27.4161	26.5808	28.2844	29.6656	30.9353	31.4965	31.809	32.202	33.0515	33.231	33.9069	35.214	35.9232	36.6776
	31.9227	31.4018	30.5455	31.3055	31.1397	30.0069	31.346	29.8594	30.0818	29.8143	29.8714	29.6601	29.9774	29.447	30.0745	29.3085	30.0095	29.8186	29.5554	29.6496	30.2915	29.8688	30.2907	29.7042	30.6815	36.7884	37.255	38.4271	40.9831	42.0315	42.5925	45.0424	46.7432	48.0291	49.5588	50.7469	52.2482	52.9223	54.6692	56.1342	57.8997	59.5835	60.8424	61.8922	62.7115	64.113	65.943	66.8158	69.1039
	24.3333	23.2123	23.1644	23.7574	23.4132	22.7603	22.9294	22.274	21.445	22.0741	21.4426	21.4329	22.281	21.294	20.9476	20.8908	19.6968	20.4856	20.2793	20.4416	19.6779	20.0346	20.2495	20.734	20.1354	22.974	23.7876	24.5211	25.1361	25.7112	27.5051	28.3409	29.6648	30.8783	31.9163	32.7542	33.8381	34.9798	35.8278	37.1308	38.3544	39.0018	40.5985	42.0572	42.4054	43.9109	44.775	44.6391	46.714
	40.8999	39.7166	39.2473	39.7378	40.2225	39.2153	40.1983	39.4767	39.0397	38.8691	38.4554	38.4593	39.2324	37.9528	38.7605	37.8692	38.8381	39.0979	38.0176	38.5794	38.7691	37.9843	39.2477	38.9163	39.3301	45.8453	45.3604	47.2305	48.6022	49.9241	50.7251	52.6841	53.9946	55.2642	55.3961	57.1723	58.8358	59.1815	61.9794	61.8934	63.9217	65.2602	66.1259	67.1166	67.7284	69.3269	70.6058	71.6632	73.0458
	34.0582	33.6382	33.3505	33.5874	34.0243	33.0037	33.2207	32.8125	32.2458	32.5396	32.5833	32.1055	32.5864	31.7207	31.4006	31.4901	31.3967	31.5383	31.6476	31.5568	31.9165	31.6933	32.1765	31.9278	32.4792	37.9331	39.2268	40.0503	42.0261	44.0704	45.208	47.4616	49.3151	51.2893	51.9732	54.126	55.4349	57.4904	58.5897	60.6062	62.4211	64.6144	65.5956	67.3465	68.0224	70.1467	71.3457	72.5471	73.6466
	36.4259	35.6184	35.1138	35.1692	35.7126	34.5469	34.8642	34.4445	33.8059	34.1016	34.2624	33.5682	34.2888	33.1434	33.5344	33.4144	33.3419	33.7221	33.3577	33.9295	34.2696	33.8896	34.5242	33.9724	34.3543	38.3705	39.3909	39.5465	42.4379	42.7764	44.3375	46.1467	48.482	49.4353	50.5696	51.934	53.9751	55.6492	56.5688	58.0645	60.1395	61.8254	62.8054	63.8158	65.0642	66.8943	68.4925	69.9963	71.4236
	26.4551	27.7405	27.464	27.6547	28.0184	28.2268	28.1454	28.7829	28.9764	28.7641	29.1157	29.2702	29.0179	28.4666	29.2068	28.145	27.5449	27.952	27.3471	26.7434	26.8072	26.8849	25.9961	25.87	26.1018	28.1346	28.1588	27.7731	28.9089	29.2116	29.6214	30.7368	30.8095	32.0288	32.2817	33.5709	33.5623	34.975	35.5048	38.0572	36.6321	36.902	38.1663	38.5391	40.2224	41.0922	42.2942	44.1675	45.4613
	25.6925	26.8115	26.9289	27.1143	27.351	27.4329	27.2054	27.9099	28.0361	28.2311	28.2798	28.1252	28.0936	27.6851	28.0305	27.7529	26.7803	27.0592	26.7804	26.0908	26.174	26.1914	25.4766	25.1027	25.5666	27.5503	27.5242	26.9503	27.893	28.4126	28.8516	29.8321	30.3177	30.3479	30.7587	31.9018	31.8477	33.1606	33.7674	35.7139	34.4744	34.9753	36.128	35.8032	37.3593	37.9508	39.2576	41.0147	41.1936
	18.7227	19.7692	19.9021	20.069	20.0679	20.6089	20.6976	20.7326	20.8001	20.9267	21.0132	21.1491	21.1709	20.4783	20.758	20.603	19.7497	19.8051	19.4303	18.9924	18.5766	18.6482	18.2247	17.2558	18.1581	24.3003	24.4714	23.9076	25.1099	25.9743	26.6829	27.3072	28.1727	29.3323	30.2117	31.3843	31.7247	33.5926	34.8037	37.0995	36.2034	37.1593	38.0876	39.629	41.0702	42.2773	43.909	46.0223	47.5961
	20.24	21.5209	21.5681	21.3995	22.1404	22.0935	21.7771	22.8114	22.4561	22.4217	22.7351	22.7074	22.6938	22.5282	22.3484	21.5005	21.1495	21.2217	20.5534	20.4689	19.8725	19.7011	19.5735	18.9638	19.3556	25.6792	25.8783	25.1757	26.4772	27.8565	27.9421	29.5981	29.8184	30.8473	31.5799	33.1702	33.9787	35.7017	36.294	39.5441	38.384	39.5312	40.6953	41.9059	42.9908	45.4342	46.1656	48.604	50.2288
	38.2905	39.178	40.1655	40.7457	41.7172	42.1249	42.0273	41.6707	40.9114	39.9172	39.7842	38.9898	37.9247	37.4743	38.1293	37.7214	37.7708	39.5758	40.0847	40.4618	40.7227	42.7502	43.3017	42.7548	41.6912	46.5951	49.3875	51.4042	50.7532	56.3742	59.6032	62.4126	64.613	67.6861	70.1649	72.9161	76.1678	78.3824	82.2079	85.6129	90.5429	93.6102	98.8911	101.788	105.987	111.28	114.599	117.318	119.22
	31.0385	31.8557	32.6462	33.0753	33.9787	34.4627	34.2636	33.4663	33.3862	32.5375	31.7693	30.8236	30.157	29.6268	29.8467	29.5465	29.2424	31.0884	31.9469	33.3504	34.0964	36.2704	37.4633	37.1536	37.0803	44.7071	46.4445	48.531	43.9137	52.0194	54.1724	55.9493	57.5942	59.3302	60.6193	61.7403	63.2155	64.9013	66.8701	68.7314	71.6538	73.898	76.6923	78.5239	81.1249	83.1919	85.7414	86.846	87.6381
	39.3289	41.1575	41.2862	42.642	43.0586	43.7216	43.7513	43.1447	42.5294	41.8106	41.2518	39.9713	39.3721	39.1219	39.2778	38.5569	38.3851	40.0692	41.4714	43.0744	43.4824	46.4928	47.1804	47.5163	46.7041	54.6957	56.8817	58.8172	54.0499	64.9322	66.9324	68.8613	70.5317	72.0713	73.5585	74.6372	76.6317	78.4879	80.3446	81.9447	85.0878	87.1273	90.4873	92.6395	95.406	98.0007	100.012	101.51	102.721
	30.313	31.5868	31.4702	32.3786	32.9054	33.5684	33.6413	33.0425	32.1095	31.5084	30.8654	30.0529	29.5078	28.8585	29.2618	29.0403	29.1092	30.6726	31.0239	31.4483	31.4231	33.0572	33.2885	32.3812	30.7409	34.7531	37.2983	39.599	37.7589	44.9907	47.6622	50.1979	52.2364	54.8013	56.6432	59.1416	60.8601	63.3078	65.9112	69.1645	72.3145	75.2416	78.9886	81.951	85.6049	88.7412	91.9988	93.9065	95.4522
	20.4921	21.5737	22.9079	23.4761	23.9021	24.9963	24.5631	23.9334	22.9604	23.1362	22.0953	21.1758	20.7794	20.3	20.7035	20.3308	20.6711	22.202	22.5745	23.347	22.9057	24.7551	24.7177	23.9096	22.727	26.8664	29.4741	31.7266	29.8186	37.7033	40.0326	42.9646	45.37	47.956	49.5291	52.4784	54.9855	57.6583	61.1016	64.0477	67.8357	71.1671	75.3566	78.0389	82.4765	85.8929	88.9112	91.6363	93.4465
	27.2158	28.5616	29.2469	30.3474	30.7945	30.1402	30.128	28.6937	27.4804	26.8391	26.5374	26.4256	26.5841	27.0745	28.1432	29.4369	29.9096	29.997	29.7062	29.7258	30.2668	30.0357	29.6799	28.9041	28.4666	30.9683	31.5764	31.4283	32.6738	33.5454	34.6691	35.2052	35.6607	37.0618	39.0404	41.4583	44.5782	48.1035	50.2269	53.0107	54.7929	56.7543	58.4944	58.8458	59.6028	60.7584	61.7674	64.5181	66.1508
	28.0044	29.1597	29.7345	30.5264	31.1556	30.9383	30.4428	29.1119	27.7973	27.1903	26.7472	26.7182	27.0952	27.5472	28.0688	29.5895	30.2594	30.3138	30.0421	30.198	30.1956	29.9452	29.8956	29.3213	28.3691	30.8898	31.1503	31.4775	32.3394	33.1217	34.085	35.0662	35.664	37.0716	39.1438	41.5328	44.7973	48.0786	51.0894	53.2372	55.8189	57.5738	58.776	59.8184	60.1933	61.1417	62.1604	64.8923	67.4467
	46.8617	47.969	49.4523	49.5219	50.0071	50.0174	49.4661	48.2439	46.8999	45.8816	45.7525	46.1084	46.0253	46.3696	47.1648	48.4273	48.919	49.2834	49.472	48.8667	48.9388	49.1478	48.5633	48.083	47.1785	49.5801	50.18	49.9116	51.0429	52.4735	53.3026	54.0835	55.1396	56.7964	59.6054	62.4475	66.587	70.6053	73.8251	77.6614	81.0593	85.5973	87.8321	89.6202	91.6155	95.061	98.1997	102.572	106.877
	39.8702	40.9046	41.7114	42.3994	42.6251	42.7772	42.4712	41.0969	39.5651	38.5624	38.6559	38.8463	38.7541	39.2877	40.1225	41.3376	41.9956	42.1359	42.1947	42.2439	42.3516	42.0088	41.2904	40.9481	40.3167	42.3016	42.1029	41.6124	41.7832	42.0644	42.751	42.596	42.4749	42.7361	44.2542	46.8293	49.3154	51.7389	54.3165	56.4272	58.1364	59.6539	60.2183	60.6234	61.0915	62.0875	63.137	65.0728	67.2716
	90.9222	92.0585	93.3189	94.8451	95.0017	94.8861	94.9854	93.056	91.3597	89.571	89.7207	89.84	90.0522	90.5559	91.6313	93.7412	93.987	95.165	95.3029	95.0358	95.4353	94.6818	93.6908	93.749	93.005	96.2288	96.9344	98.1643	99.1199	101.434	103.688	104.419	106.345	108.255	111.476	115.431	119.583	124.258	127.899	130.984	133.114	135.336	136.121	136.434	136.415	137.612	138.413	139.788	141.752
Time (s)	0	2	4	6	8	10	12	14	16	18	20	22	24	26	28	30	32	34	36	38	40	42	44	46	48	50	52	54	56	58	60	62	64	66	68	70	72	74	76	78	80	82	84	86	88	90	92	94	96
[truncated: 276 more columns]

## Sheet: Figure 6G-6I
NS shRNA	38.7687	38.5897	39.5794	40.6113	41.0603	41.8281	42.6926	43.4875	44.0642	45.4967	46.0051	46.6836	48.1309	49.0067	49.1962	50.3366	51.6057	51.8992	52.2222	54.1382	54.374	54.8468	56.1705	59.4556	58.2297	62.2816	63.1217	63.966	65.5156	66.3654	68.0722	69.7135	72.0851	72.109	73.9841	76.1944	77.1376	79.2104	79.8948	82.5317	84.8208	85.5279	88.8938	90.7582	93.3153	96.0525	95.9133	100.704	103.51
	18.8693	18.8566	19.2445	19.737	20.7248	21.2103	21.5127	21.6879	22.3991	23.0651	23.796	23.7773	24.5725	24.8284	25.6423	25.6826	26.3738	26.3224	26.7177	27.5566	27.6846	27.8892	28.7435	31.4096	29.7941	35.1684	35.8426	36.94	38.6824	39.549	40.8892	42.6432	43.9442	46.0742	46.9247	48.9456	50.4506	51.9287	53.2545	55.5127	56.9977	58.119	59.5864	61.4472	63.4213	64.9946	65.1757	67.6329	68.9676
	12.1418	11.8003	12.2534	12.9326	13.5866	14.1909	14.9123	15.2604	15.6594	17.0433	17.7331	18.1084	19.1012	19.7595	20.42	20.7535	21.4457	22.1429	22.5057	23.6606	23.8613	24.086	25.2689	28.2295	26.5825	30.947	31.6377	32.7012	34.0604	34.951	35.877	37.6186	38.9333	39.6233	40.7857	41.9616	43.4184	44.5423	44.9285	47.1591	48.2209	48.7869	50.5515	51.3482	52.6901	54.1989	53.4767	55.1734	57.0744
	36.3276	35.6443	36.3538	36.6382	37.1803	37.1704	37.8252	37.7491	38.0407	38.8512	39.3654	39.5991	40.077	40.5493	40.923	41.4027	41.5465	41.4413	41.9027	42.5095	42.5008	43.1508	43.9475	46.6978	44.7092	49.532	49.9485	51.1336	52.6825	54.3264	55.9414	57.9371	59.6841	61.8362	63.6751	65.7931	67.7213	69.7973	71.7902	74.4326	76.6339	78.5511	81.4025	84.1236	86.2137	88.8298	89.4701	93.0875	95.812
	39.2675	38.3427	39.1647	40.1397	41.2634	41.6259	42.1668	42.6155	43.2578	44.2232	45.6234	45.9513	46.8084	47.4137	47.4902	47.4601	48.2794	47.771	47.944	48.1928	48.637	49.1946	49.9	53.3271	51.2074	58.4159	60.1206	62.2226	66.0351	68.1693	71.6493	75.7257	79.4696	82.6479	86.9108	91.312	95.1627	100.038	104.247	110.085	114.5	117.94	123.974	128.952	133.514	138.648	140.649	146.768	152.708
	34.5331	33.3743	33.867	34.9744	36.22	36.3765	36.8699	37.402	38.3748	38.8899	39.6893	40.0236	41.5275	41.4059	42.1469	41.8499	41.9813	41.9617	41.6195	43.0047	41.7012	42.8385	43.2043	46.634	43.6432	50.942	52.1941	55.299	58.6058	61.3402	65.4619	69.2128	72.6663	75.7429	80.1448	84.2939	89.3622	94.8178	99.1464	105.542	110.915	115.207	120.421	127.2	133.328	139.643	141.346	148.009	154.575
	22.7355	22.4126	23.0663	24.0194	24.982	25.2476	25.6842	26.2633	26.8966	27.8262	28.2939	28.9451	29.6917	30.6567	31.0608	31.7474	32.1925	32.7349	33.3617	34.1373	34.149	35.0242	35.9502	38.3185	37.1315	41.3465	41.5865	42.3955	43.5411	43.9252	44.9682	46.1635	47.5373	48.7721	50.2347	51.2603	52.354	53.6013	54.2281	56.1668	57.4016	57.5938	59.4204	60.7126	61.4054	63.4383	62.8621	64.7334	66.4457
	15.313	15.1951	15.7626	16.1077	16.9535	16.4791	17.297	17.6237	18.0899	18.4359	19.001	19.2703	19.8966	20.4101	20.3444	20.9176	21.1269	21.5211	21.6154	21.9551	21.7329	22.3422	23.1182	25.7547	23.8075	27.0329	27.3664	27.6939	28.8465	29.4298	30.5176	31.4738	32.4565	32.7352	33.2091	34.7519	35.8347	36.7925	37.5757	39.399	40.3911	41.1613	43	44.0234	45.5982	47.7296	47.6578	49.931	52.0288
	28.17	27.4583	28.4116	28.6823	29.399	29.9115	30.5383	30.6591	31.4908	32.1743	33.1719	33.2042	34.2235	35.0309	35.3164	35.9134	35.8636	36.6569	36.5625	37.7934	38.0393	38.3175	39.2172	42.2177	39.7664	44.8428	45.8353	47.4689	49.5422	51.3243	53.3169	55.3167	58.2011	59.3559	61.6594	64.6128	66.9161	70.48	72.7984	76.0622	78.5801	80.924	84.649	87.1539	89.6271	92.8573	93.8068	98.0463	101.357
	48.4655	47.2327	48.1534	49.0177	49.6213	49.6618	50.5415	50.902	51.1982	52.0985	53.6209	53.3786	54.7143	55.4101	55.7727	56.5831	56.8342	57.2109	57.2014	58.4359	58.7126	59.4898	60.2883	62.8583	61.1413	66.776	68.2728	69.4143	72.1039	73.3253	75.5685	77.5928	80.6529	80.6298	82.9362	85.6453	88.3458	91.1677	92.9829	96.0738	98.6059	100.52	104.168	106.566	108.991	111.383	112.199	116.636	119.031
	18.2426	17.9994	18.8709	20.0504	21.0788	21.5802	22.7169	23.2	24.5142	25.856	27.2169	28.3515	29.3768	30.3731	31.0187	31.8276	32.8694	33.5457	34.1329	35.1588	35.6219	36.7989	38.1387	40.9357	40.0967	45.7505	46.7169	48.0251	50.1047	51.7627	53.4954	56.0018	57.9564	59.7901	62.7397	64.8414	67.0655	69.7329	71.2328	74.1259	76.1736	77.8504	80.7921	82.9468	85.4411	88.0299	89.2213	92.7379	95.0517
	36.0913	35.4323	36.0818	36.6864	37.5292	37.7955	38.7565	39.0279	39.5252	40.5926	41.4013	42.0454	42.6305	43.6707	44.2187	44.3151	44.8649	45.0404	45.6089	46.6343	46.554	47.5124	48.5027	51.4786	49.6229	53.6334	53.9878	54.7195	57.016	58.0708	59.6178	61.7863	63.4272	64.5805	66.7317	69.2336	71.0396	73.8589	75.5555	78.8539	81.3715	83.4308	86.4492	89.3168	92.7923	95.6797	96.9249	100.485	104.6
	25.9591	26.2114	26.6038	27.1938	27.7081	27.902	28.6068	28.8951	29.4517	30.4774	30.813	30.9778	31.8938	32.3543	33.1857	33.0456	33.4568	34.2041	34.3792	35.76	35.8486	36.557	37.6405	40.0183	38.4696	44.7667	45.3141	46.4418	48.3465	48.9166	50.902	52.4309	54.5492	56.0858	57.8699	59.8348	61.8645	64.0744	65.7524	68.6006	69.8686	72.1806	75.0901	76.8345	79.3337	81.654	82.7116	85.4757	88.8114
	64.2965	63.7536	64.7085	65.2217	66.6048	66.323	67.5612	67.5304	68.1168	69.2532	69.7301	70.3283	71.2416	71.8473	71.8073	72.3449	73.1255	73.3903	73.597	74.4598	74.5524	75.321	76.5647	80.163	77.9685	85.0445	85.6831	87.4603	89.3841	90.2552	91.672	94.0687	96.2545	97.9098	100.154	102.471	103.794	105.502	107.127	109.95	111.757	112.677	115.518	117.408	119.583	121.959	121.837	126.277	128.475
	44.9424	44.715	45.3332	46.016	46.8331	47.0265	47.8748	47.9945	48.3378	49.1367	49.6984	49.8302	50.7294	51.411	51.4332	51.8849	52.1475	52.1012	52.1958	52.8456	52.1074	52.8207	53.8936	56.1633	54.2599	59.6453	60.2574	61.5806	63.0281	64.4147	65.5887	67.7026	69.8211	71.6095	73.2483	75.8923	77.6448	79.5225	81.0131	83.7988	85.4812	86.6196	89.6067	91.5778	93.545	95.6199	95.9357	99.6482	102.374
	35.7478	36.018	37.4676	39.204	41.5493	42.2147	43.6332	45.1565	46.3108	48.5306	50.3152	51.7031	53.654	55.0083	56.3033	57.5612	58.4089	59.0676	59.5092	60.3453	60.6344	61.0049	62.8498	66.0484	64.0116	66.1183	65.8727	66.8464	68.264	68.9977	70.0162	71.9759	73.9816	75.8063	77.365	79.7558	82.5634	84.4608	85.8165	89.6522	91.0487	92.7487	96.0933	97.972	100.488	103.45	103.345	107.019	110.031
	22.5563	22.0901	22.9835	23.7365	24.8517	25.2509	25.8658	25.8434	26.8687	27.5629	28.1408	28.659	29.3932	30.4428	30.1822	30.849	30.8492	31.6309	31.7859	32.204	32.3899	33.0182	33.5635	37.0227	35.1487	39.9645	40.5617	42.1088	43.855	45.1816	47.0467	48.9122	51.1738	52.8294	55.2333	56.9561	59.3276	61.6762	63.2283	66.5819	69.0858	70.5214	73.7319	76.2861	78.9053	81.5634	82.3888	86.3341	89.848
	27.0999	26.1967	26.78	28.4362	28.9615	29.4508	30.3447	30.198	31.2524	32.0239	33.1086	33.4246	34.3266	34.7827	35.3352	35.5677	36.4922	37.2295	36.9746	37.9062	38.3175	39.3228	40.6578	44.2592	41.8535	48.8934	49.6171	50.8812	53.8093	54.9226	56.1009	58.6174	61.2843	63.6867	65.9726	68.1047	70.8544	72.7345	74.8318	77.9217	80.2398	81.3937	85.0951	87.2093	90.6306	93.3144	93.8914	97.6499	101.411
	44.1713	44.212	44.5659	45.1322	44.9687	45.1129	45.667	45.5741	45.8172	46.5307	46.013	46.5168	47.1486	46.923	46.8481	47.4359	48.2167	48.631	47.8842	47.9836	49.2972	48.7299	49.9061	49.7679	50.5597	51.1013	52.9476	61.8742	60.4434	63.3666	66.5851	69.7619	72.6128	77.4101	82.1835	86.6467	90.7837	94.1847	98.4053	103.255	107.544	112.189	115.832	120.112	124.414	127.445	133.126	135.521	139.376
	32.4758	32.3728	32.7106	32.7723	32.6865	32.9448	33.2086	32.8378	33.1428	33.7554	33.6643	33.6885	34.3646	34.0129	33.9408	34.2835	34.4029	34.3423	33.8637	33.9449	34.7416	34.0001	34.5504	34.7453	35.0151	31.1691	31.7837	35.4137	35.9087	37.1046	37.9337	39.2458	39.4358	41.5859	43.2058	44.4107	45.5291	46.6484	48.0931	49.6294	50.8255	52.0699	53.9401	55.289	56.5225	58.3846	60.2865	61.3841	62.4084
	13.5536	13.3867	13.7565	13.8188	14.1803	13.9447	14.5248	14.5607	15.0211	15.0978	14.7098	14.9126	15.8638	15.9083	15.7588	16.4366	16.7136	17.4906	16.4175	16.984	17.7884	17.353	18.0927	18.5123	18.6634	19.9196	20.7556	20.8619	22.105	23.414	24.6091	25.1668	26.3607	28.2082	30.4639	31.5714	32.861	34.4842	36.2046	37.6791	39.4956	41.7847	43.8877	45.194	47.6961	49.5489	52.2619	54.2386	56.1194
	55.8488	54.7062	54.9433	55.3206	56.1212	56.3284	57.0212	56.3277	56.3999	56.5241	56.0296	56.0179	56.8519	56.4955	56.3642	56.1865	56.7135	57.1934	55.9249	56.1909	57.1211	56.5911	58.2955	58.349	58.384	58.0572	59.7575	61.7603	63.2653	65.4587	67.7213	69.8378	72.2428	76.2193	80.006	83.8403	87.3302	90.5029	94.1257	98.3259	101.765	106.273	109.903	113.782	118.081	121.362	127.194	130.29	134.067
	8.36069	8.12605	8.44829	8.17731	7.65892	7.69751	7.91082	8.13193	8.04775	7.91821	7.94207	8.15628	8.01972	8.78563	8.3886	8.56878	8.68769	8.83838	8.3158	8.31793	9.00417	8.77654	9.70014	9.93773	9.7782	9.13656	9.8387	10.9597	11.983	13.1494	13.7061	14.5092	14.6085	16.4026	17.2237	18.3613	19.345	20.7568	21.6121	23.4024	24.4542	26.0413	27.8309	29.0652	30.4275	31.6063	33.3846	34.2473	36.2203
	22.5054	22.4582	22.4368	22.4595	22.2039	22.3612	22.3796	22.5615	22.2567	23.3095	22.9226	23.1489	23.4931	23.1356	23.2982	23.18	23.5516	23.613	22.8234	23.2456	23.8453	23.2861	23.81	24.0987	24.0826	23.442	24.7301	34.8745	28.9933	30.323	31.5786	32.9541	33.7916	35.8594	38.1701	39.2823	41.1226	42.6015	44.3104	46.1345	47.1383	49.8124	51.7161	53.141	55.7772	57.1405	59.7634	61.0505	62.9089
	61.808	61.5287	61.6137	62.5446	62.5764	62.7878	62.6907	63.1695	62.9591	63.9237	62.7295	63.4555	63.7216	63.4764	63.8696	63.7915	63.7873	64.7962	63.5244	62.8248	64.8695	63.944	65.8914	64.9769	65.6197	66.2338	68.6853	67.6651	71.3222	74.5134	77.0355	80.6965	83.4361	88.4513	91.7623	95.8441	99.6525	103.682	108.172	113.277	116.405	122.063	126.329	130.65	135.3	139.816	145.997	149.366	154.068
	28.0978	27.2985	28.1343	28.0167	28.1841	27.9957	28.2045	28.0533	28.1974	28.3033	28.0932	28.5702	28.8912	28.7368	28.668	28.8718	29.3895	29.4038	28.8723	29.0818	29.9774	29.3961	30.0231	29.5338	30.5352	29.7136	31.0306	31.6263	32.1842	33.8078	33.8898	35.0091	35.9191	37.3785	38.4873	39.8286	41.0167	41.8685	43.1222	44.7845	45.8418	47.804	49.4548	51.3966	52.3974	53.9793	56.5132	57.3085	59.4619
	32.094	31.6354	31.8801	31.863	31.5571	32.1164	32.577	33.3567	32.8963	33.1114	32.6774	32.7547	33.2466	32.8453	32.4193	32.8353	32.9767	33.1422	32.3632	32.6991	33.0613	33.1545	33.6311	33.6735	33.8804	33.4477	34.7485	34.0172	37.5734	38.7075	40.3709	42.1844	43.4232	46.4635	48.6343	51.4879	53.5571	56.0998	58.799	61.7543	64.6286	67.2002	70.0382	73.1917	75.8756	79.011	82.8854	85.4121	88.4576
	22.5901	21.5634	22.4227	22.3934	22.3287	22.7697	23.2179	23.5968	23.5655	23.6703	23.0738	23.315	23.2193	23.4916	23.235	23.5518	23.3077	23.8278	23.3007	23.7734	24.0418	23.6994	24.5268	24.9108	24.9839	24.2636	25.3425	30.3948	26.1772	27.7895	28.6951	30.1081	31.1165	33.2651	34.819	37.1874	38.231	40.4915	42.148	44.59	46.644	48.2487	50.795	52.6852	55.135	57.1005	60.8373	62.1473	64.819
	39.4041	39.3951	39.1461	38.6108	38.4881	38.6134	38.2999	38.1895	39.0061	39.2044	39.2478	38.7728	38.8904	37.5032	38.1172	38.8896	38.4443	38.1588	38.137	38.3886	37.7179	38.4315	39.0669	38.2953	38.9377	40.6974	41.8406	43.1476	45.7715	47.7811	50.5259	53.3969	56.2764	58.2625	61.5185	66.9507	70.645	75.136	79.7687	83.691	88.1414	92.0152	96.1544	98.6484	104.917	109.591	114.517	118.774	123.274
	35.9871	36.0715	36.1139	36.4395	36.1139	36.641	36.3802	36.1808	36.8678	37.3018	37.2322	37.1075	37.3105	35.9975	36.0901	36.566	36.4266	36.4835	36.5813	36.3466	35.4313	36.5164	37.1214	36.344	36.6095	37.5943	38.2224	39.5892	41.6785	43.5651	46.2376	49.1811	52.1342	53.7442	56.9061	62.2813	64.5671	68.9636	72.6018	76.1867	79.645	83.1127	87.1747	89.1973	94.4919	97.6869	100.714	104.038	107.856
	29.0692	29.1666	28.7585	29.4068	29.2178	29.6903	29.4665	29.3238	29.8515	30.6545	30.3146	30.2204	30.5367	29.3184	29.7331	30.3831	29.9054	29.6948	28.7994	30.2611	29.1035	29.8562	29.6258	29.6272	30.1068	30.2321	31.3975	32.318	33.0154	35.2111	36.4512	38.011	39.5432	40.5734	42.3605	46.3138	49.2714	52.4324	56.9081	59.425	63.208	67.0141	70.2965	71.5975	77.9314	81.786	86.2316	90.06	93.6154
	24.8396	24.5587	24.8306	25.0309	24.8163	24.8666	24.744	24.8356	25.345	25.677	25.6579	25.4528	25.3418	24.7991	25.3076	25.4952	25.1778	25.4186	24.6917	25.3288	24.736	25.1029	24.5642	24.8018	25.0771	25.9378	26.6102	27.6162	27.6716	28.264	29.8872	30.8803	32.0343	32.0815	33.7507	36.6508	38.3716	40.6665	42.6378	45.0246	46.3227	48.7482	50.3611	50.3284	54.0271	55.5932	57.7583	59.4021	61.1814
	35.4031	36.0265	35.9915	35.8338	36.3077	36.6091	35.626	36.0085	36.6314	36.8742	37.1277	36.51	36.7657	36.1073	36.1121	37.005	36.6177	36.8955	36.5242	36.5744	36.1173	36.7546	36.923	36.4795	36.6385	38.1461	38.6682	39.5809	41.4282	42.2581	43.6084	44.2912	46.0415	46.6847	47.4965	50.8949	52.693	54.6621	56.6493	58.7401	60.6144	62.1495	64.0284	64.8687	67.7828	69.3534	71.1652	73.2738	74.9009
	28.5283	28.6058	28.885	29.1622	29.5277	29.7591	29.4066	29.698	30.3187	31.1923	30.9091	30.4186	30.9765	29.7711	30.0617	30.7235	29.9831	30.3772	30.0734	30.7266	30.0588	30.8568	31.099	30.3793	31.0474	30.9869	31.9423	32.9025	34.247	35.401	36.9719	38.5405	40.505	41.0864	42.841	46.8048	48.9856	51.5845	54.8713	58.0222	60.3892	62.8151	65.1484	65.82	70.0103	72.091	74.711	76.8815	79.3665
	22.6339	22.7123	22.8858	22.8697	23.1158	23.5483	23.8051	23.577	24.451	24.9244	24.8944	24.7999	25.9207	24.5839	25.4564	25.9264	25.7391	26.0808	25.7543	26.0569	25.2503	25.9706	25.5141	25.8526	25.6172	27.5452	28.595	29.5436	32.2159	33.3074	34.8936	37.6971	40.0097	41.6376	43.9036	48.5083	51.3682	54.4351	58.4582	62.8431	65.6445	69.0703	72.5273	74.3601	79.3121	82.0307	86.2396	89.0155	91.9122
	15.6885	15.6844	16.3803	16.1397	15.9432	16.3482	16.234	16.0614	16.6757	16.6494	16.395	15.7695	16.1577	15.2335	15.4873	15.4433	15.4302	15.2785	14.8942	15.3005	14.8614	15.1815	15.3685	14.6126	15.1159	16.3655	17.2936	18.0121	18.9744	20.1973	22.1649	23.9133	25.6036	26.605	28.1858	32.2996	34.9422	37.6809	40.812	43.2958	46.2965	48.6897	51.5387	52.884	56.4138	58.8403	61.8127	64.3755	66.3081
	33.8544	33.8743	33.9757	34.0277	33.8196	34.3839	33.9656	34.1627	34.7058	34.9656	35.0969	34.7796	34.7189	33.4065	33.902	34.6138	34.0644	34.4107	33.7367	34.253	33.5606	34.6674	34.7577	34.1851	34.4971	38.6594	39.7187	41.0376	43.2834	45.5412	48.0968	50.5235	53.7142	55.9744	58.3369	62.8945	65.8504	68.963	73.1759	76.6955	79.4615	82.024	85.4955	86.7806	91.7898	94.3258	96.7396	99.7808	102.832
	27.8226	27.6955	27.5694	27.819	27.727	28.2618	28.1202	28.3536	29.1711	29.2177	29.4784	28.9914	29.4461	28.4529	28.4765	29.1977	28.9527	28.8818	28.4077	28.9294	28.4972	28.9087	28.9417	29.1215	29.0475	27.7396	28.6801	29.6376	30.0397	31.162	32.1907	33.6158	35.4199	35.7886	37.4476	40.6876	42.1235	44.3382	46.4226	48.6092	50.4715	52.0923	53.7498	53.8721	57.21	58.5256	60.3469	62.0423	63.5963
	23.0462	23.0942	23.0606	23.0965	23.0039	23.3359	22.6605	23.3522	23.6285	23.9176	23.8035	23.2765	23.6541	22.7248	22.6265	23.0422	22.6625	23.1523	22.9332	22.9329	22.592	22.9564	23.08	22.984	22.961	23.6923	24.0971	24.8045	25.859	26.406	27.3805	28.4772	29.361	29.6032	31.2035	34.1822	36.2657	37.8901	40.3042	42.7076	44.5355	46.3499	48.8111	49.8836	53.5046	55.6904	58.5259	61.1202	63.9359
	37.5153	37.7824	37.9913	37.8522	37.8443	37.9811	37.8177	37.1264	38.7583	38.8293	38.2699	37.4096	38.4961	36.074	36.0889	36.4407	35.7821	36.3624	35.9179	36.6512	35.4852	36.5272	36.1566	35.1935	36.4805	35.8677	36.9073	37.956	39.2662	40.8865	42.368	43.4944	45.3593	46.1754	47.5085	51.6384	52.9581	55.1769	57.8037	60.2879	61.222	63.9348	65.6717	66.2614	70.0078	71.7504	74.3905	76.3302	77.571
	22.2786	22.43	22.0508	21.9862	22.334	22.727	21.8806	21.7243	22.794	23.2286	22.9318	22.0735	23.1255	21.3603	21.8781	22.7334	22.3899	22.4416	22.3286	22.283	21.5427	22.4474	22.5739	22.1254	22.3895	26.3478	28.5763	30.7514	34.404	37.4801	41.7598	45.1431	49.3582	51.8818	55.7634	62.3572	66.2143	71.279	76.0045	79.6227	82.8853	85.9652	89.913	91.7143	96.3632	99.6132	102.8	105.292	107.957
	33.138	32.5499	32.2902	32.7111	32.9275	33.1048	32.3509	32.8008	33.1019	33.2624	33.427	33.0366	32.7528	32.3977	32.1944	32.4099	32.3878	32.558	31.6032	32.2249	31.5533	32.0236	32.0066	32.1282	31.7272	34.7469	35.2912	36.2464	38.7629	39.8546	41.9039	43.9544	46.0214	47.3509	49.3138	54.2617	57.0889	59.846	63.3893	66.8245	69.9369	71.9724	74.9063	76.1069	80.1077	82.5314	85.593	87.3835	90.0348
	34.6188	33.6222	34.4865	34.0782	33.8025	34.3823	34.3757	34.7804	35.1685	35.9196	35.7304	35.5534	35.8323	35.1057	34.9235	35.3075	35.2973	35.4916	35.2732	35.8525	34.7577	34.9868	35.6263	35.4299	35.012	36.2101	37.58	38.2043	40.2504	41.7271	43.5122	45.7635	48.0122	49.3791	51.5777	56.2683	59.2939	62.7488	66.7634	69.9464	72.6867	76.6355	79.5835	81.7217	86.2065	88.9829	92.5247	96.4388	99.3711
	30.2042	29.8722	30.4372	30.6523	31.0126	31.0356	30.5479	31.2017	31.9482	31.9578	32.6973	31.9832	31.7374	30.8578	31.0796	32.1362	31.608	32.3627	31.9467	32.1681	31.3764	31.9526	32.306	31.2774	31.8876	34.2839	35.2395	35.904	37.5722	38.6664	40.268	42.0951	44.4138	45.8908	48.5882	53.1279	56.6224	60.3747	64.5468	68.3063	72.0327	75.5724	79.2802	82.2313	86.9883	90.5858	94.6989	98.0919	101.088
	25.5513	25.5128	27.0028	26.9533	27.7556	27.3384	28.4619	28.4324	29.119	29.725	29.6533	29.7386	30.0704	30.4708	30.0769	30.1798	31.1765	29.5525	30.3899	30.8494	31.0513	31.3027	30.9015	31.0277	31.2806	32.8096	31.2299	32.3052	33.5982	35.2363	37.1869	38.0717	38.1908	38.2881	38.7082	39.1137	41.3148	43.4843	45.5366	48.1707	49.9183	51.2538	52.3044	53.6596	52.6031	53.4867	54.8373	57.1885	59.3651
	30.3383	30.5172	31.639	31.7807	32.3475	32.5635	33.769	33.7077	34.4008	34.6769	35.0241	36.162	36.1279	35.7835	35.5963	36.5833	36.2872	36.457	37.5096	37.7531	37.4659	37.543	37.4325	38.1191	38.5508	39.1444	39.6325	40.2851	40.6938	43.2264	46.0695	47.2137	47.6171	46.8179	48.4382	49.2779	51.3	52.2793	54.8728	58.1131	58.8183	60.4864	62.0051	61.3486	60.5528	60.6983	61.9775	62.6089	64.5864
	26.3298	25.8283	27.0644	27.8477	27.4964	28.4056	28.7496	29.8015	29.6868	29.7253	31.1682	31.4298	30.7701	31.1878	31.9811	31.8185	31.5093	32.4222	31.9597	33.5761	32.9413	32.2607	32.3106	32.4515	33.5603	34.8162	33.6714	34.8089	36.5654	39.1059	40.4512	42.518	42.4433	42.5498	42.6043	43.5994	45.2957	47.132	49.7079	52.0636	53.8818	54.5356	55.6258	55.4389	54.4979	54.4422	55.9919	56.6492	58.0197
	27.3478	28.1851	28.4668	28.5679	29.1397	30.3622	30.0354	30.9745	31.6041	32.0534	32.1354	32.1951	33.157	32.4317	33.1013	33.0566	33.7366	33.3139	33.684	33.8345	34.1878	34.3348	34.4841	35.3084	36.1553	38.5177	37.6872	38.3147	40.1548	42.799	44.3012	46.0022	46.8579	47.8226	47.9918	49.4139	51.5108	53.9826	57.3346	60.3838	62.7267	64.5551	66.4014	66.0989	66.1936	66.5907	68.6114	70.7764	72.8679
	21.822	22.5413	23.0881	23.3471	23.2707	24.2839	24.8201	25.6669	25.7852	26.3478	26.7957	27.1899	27.0108	27.3553	27.2133	27.3331	27.7894	27.1736	27.6023	27.9755	27.5642	27.784	27.6822	28.9762	28.9573	30.6348	29.2397	31.0032	31.4288	34.83	36.1176	37.6318	38.363	38.7958	38.5195	39.993	41.8125	44.0115	46.5319	50.3517	51.3901	53.3672	54.9674	55.5948	54.0438	54.3488	56.9549	58.0654	59.8062
	26.0502	26.1954	27.0445	26.6965	26.5704	27.1277	27.5458	29.0585	29.3516	28.8691	30.1268	29.2113	30.1035	30.0211	31.2111	30.1828	29.6267	29.9405	29.0116	30.9614	31.9191	30.4025	29.9037	30.4439	30.3448	31.9358	31.0873	31.3036	33.4684	35.4636	36.2061	38.0122	37.4889	37.3225	37.3862	39.0775	40.5714	41.8263	45.429	47.2392	49.7583	51.1968	52.4187	53.9478	53.4054	54.1875	56.1411	58.7452	60.0348
	24.0182	23.1181	23.8499	24.1514	25.4486	25.4806	25.6656	26.3159	26.6655	27.954	27.2756	28.2125	28.7569	27.7859	28.9055	28.7204	28.4265	29.2576	28.9757	29.0999	29.2285	29.4282	28.49	29.6674	30.0203	30.7886	29.8067	30.3591	31.6704	34.9537	35.366	37.1236	36.0647	36.8226	37.2157	38.397	41.401	42.7292	44.8153	48.1483	48.9887	50.6637	51.993	53.4539	52.3545	52.2767	53.0818	55.0586	57.4158
	25.5372	25.5849	26.2848	26.1333	25.6156	26.9292	27.8306	27.5184	28.4471	28.3589	29.3008	29.3001	29.7978	29.5645	30.681	30.0913	29.5784	29.0301	30.4313	30.7688	30.9695	31.0527	30.0562	30.7946	31.0456	32.7239	31.6585	32.276	34.8383	36.9738	38.4146	40.4267	40.2184	40.7264	42.0671	43.2631	45.3772	48.0705	50.4424	53.7326	56.0823	58.7572	60.2807	60.9357	61.4419	62.0474	64.0867	65.3648	68.8774
	25.7781	25.6019	26.9904	27.0937	28.0559	28.2317	29.0613	29.3494	29.2485	30.3042	30.544	30.438	31.2739	30.7228	31.4866	31.5055	31.2433	30.9467	32.0288	32.192	32.6513	32.496	31.8786	32.7815	32.7225	34.1532	33.2381	34.2772	36.506	37.8575	39.3851	41.1806	40.8181	40.7625	41.0003	41.5451	43.7957	44.3683	47.0294	50.2318	52.207	52.4604	56.0653	56.0109	54.9884	55.9047	57.9272	59.3539	61.2601
	18.1075	18.6571	18.421	19.5889	19.8591	20.45	20.3904	20.8018	21.2476	21.7638	22.2477	22.5958	22.3689	21.6094	22.1035	22.9317	22.5305	22.4852	22.9681	23.1332	22.9278	23.1352	22.9073	23.4915	23.292	24.4228	23.3391	24.4774	26.099	27.7867	29.6852	30.5229	29.8957	30.4274	30.9441	30.192	32.4541	33.0762	35.3152	38.4224	39.6257	39.5116	41.1996	40.5815	39.8848	40.1476	41.1105	42.4138	43.8208
	21.0167	21.0329	21.4028	22.4078	21.7254	23.0913	23.4554	23.1681	23.5995	24.4567	24.4264	25.2015	24.3733	24.8368	24.3154	24.3374	25.6064	25.3532	24.791	24.8569	25.7157	25.2511	25.4951	25.3552	25.8439	28.9914	27.4218	29.4615	30.2394	34.2843	34.8837	36.826	37.3897	37.1182	37.203	39.6006	40.3221	41.0771	43.7939	46.7323	49.1875	48.0574	50.4401	50.8232	50.6607	50.5123	50.9633	51.8142	55.6222
	26.4307	26.8928	28.2472	27.2773	28.6299	28.9793	29.1747	29.7558	30.6646	30.2094	30.588	31.1424	32.0685	31.8331	32.149	31.2237	32.3421	32.0428	33.4272	32.2971	33.3772	33.3372	32.6975	33.8486	33.6558	34.83	33.9317	34.9487	36.6727	39.1752	40.225	41.1559	40.4935	41.2824	40.3763	42.1102	44.4214	45.2015	47.6351	49.5777	51.6298	52.6072	53.2711	53.4115	52.9041	53.2215	54.2786	55.6583	57.5043
	23.2776	22.446	24.1383	23.7574	24.3095	24.6831	25.3501	25.4768	25.7168	26.0933	26.4346	26.2721	27.6709	27.275	26.9683	27.1087	27.6907	26.9291	27.4727	27.9466	28.0536	27.7774	27.6568	27.3137	28.039	28.8581	27.8551	28.8618	29.7166	32.6741	33.6919	34.5635	34.9761	35.1479	34.9327	35.4319	36.4803	39.1505	41.5789	42.5454	45.0326	44.9619	46.7874	47.2964	46.3111	47.1041	48.1525	48.8862	50.8477
	31.4324	31.5081	32.8331	33.2811	32.5799	33.9418	34.282	34.8772	35.1937	36.4868	36.6645	37.1623	37.1254	37.208	37.0331	37.6255	37.2904	37.4645	37.6492	38.5591	38.7583	37.8745	37.8533	38.994	39.3659	40.9668	39.4456	40.691	43.3511	45.5303	47.7758	49.2458	49.959	50.2671	50.5721	51.6984	54.0817	55.8938	59.2441	61.4507	64.4501	65.3291	66.3496	66.9063	66.095	67.6364	68.6474	70.7993	71.5335
	21.7457	21.8496	22.9327	23.1376	22.8866	23.7771	25.2145	25.1384	26.1236	25.7312	27.3019	26.4841	28.5391	27.1905	27.9209	27.8961	28.8693	27.2434	28.217	28.7818	28.7767	28.6022	29.3369	29.7761	29.4777	30.8943	30.13	31.3176	32.6452	34.244	35.9001	37.1554	36.9564	35.7533	36.227	37.4883	39.1905	40.2457	42.1279	44.8107	46.5026	48.1848	48.6578	48.1804	48.4333	48.549	50.165	51.1947	53.4029
	26.1423	25.707	27.18	26.7952	26.9571	27.6019	28.0087	28.6679	29.8902	30.1029	29.9825	29.5879	31.4404	30.6007	31.5789	31.6015	31.9707	31.1196	31.673	31.6179	31.45	31.4383	31.1534	31.2964	32.1665	33.2524	31.4242	33.0476	33.791	35.6627	37.1164	38.995	38.8121	38.0379	39.1492	39.5369	42.8045	44.4796	47.0604	49.1495	51.2351	53.5655	55.0504	54.6441	54.9939	54.6739	56.4418	59.5215	60.7187
	26.454	26.7607	28.0338	27.4287	27.9247	29.0067	29.3043	30.0974	30.6656	31.5763	31.2598	31.383	32.3929	31.7347	33.0723	32.4543	32.8022	32.3721	33.3124	33.1737	33.5643	33.0091	33.0435	33.4917	34.1348	34.8508	33.6438	34.273	35.9941	38.3573	39.2609	40.0714	40.1104	39.7296	40.6803	41.1608	43.4087	45.0252	47.6807	50.5474	52.0089	52.5313	54.7621	55.3309	54.5718	54.4243	56.5473	57.3255	60.2465
	21.5288	21.3264	22.3578	22.1316	22.4053	23.1132	23.4736	23.2196	23.5579	24.4761	24.1918	25.0067	24.5785	24.6285	24.7753	24.7672	24.8415	24.1375	24.3374	24.866	24.6231	24.42	24.6568	24.286	25.2244	26.0327	25.1241	25.816	27.3523	29.3373	30.9893	31.7313	32.1919	32.4158	32.3012	33.0952	34.7143	36.3805	38.8863	40.6066	42.2757	43.8293	44.5821	44.8643	44.2844	44.1644	45.5374	47.0884	49.6409
	24.7727	24.3947	26.6991	26.2935	26.191	26.8079	27.4095	27.6727	27.8713	28.7441	29.1723	28.7736	28.9149	29.1787	29.6425	29.4871	29.4019	28.6692	29.417	30.1248	29.9439	29.7684	29.5601	29.6851	30.0352	31.5821	30.7961	32.784	33.6791	36.3458	38.6603	40.7419	41.4336	41.5616	42.1971	43.4786	45.3636	47.0843	50.4753	53.2399	54.2753	56.3405	58.7713	58.0381	58.1969	57.5183	59.2173	61.7456	63.369
	21.3456	21.8471	21.7032	22.4863	21.8527	22.9024	23.0162	23.1202	22.9434	23.6599	23.7086	23.6732	24.7635	24.2148	24.0456	24.6237	24.3829	23.5365	24.262	24.5396	25.4009	25.0621	24.2819	24.3666	25.6962	26.3082	24.8236	26.1825	26.3154	28.9346	30.0624	30.3684	30.1354	29.9077	29.3414	30.7467	32.0788	33.4644	36.0713	37.9579	40.2544	41.5041	42.5041	43.4622	43.1169	44.2899	44.9269	47.0698	49.2451
	40.6093	42.1809	42.6911	42.8121	40.9024	38.8615	38.8161	40.8277	42.4118	42.1675	39.489	38.7591	37.4961	39.1552	41.5928	41.7417	40.4839	38.1842	38.1015	37.9952	41.4095	41.1937	41.3406	39.3729	38.0273	39.0129	40.0353	42.4945	43.4174	41.6387	40.5326	41.5652	43.9367	46.1434	45.767	43.9572	43.5072	45.0181	46.8425	48.3395	50.5887	48.2475	47.4674	46.6883	49.7662	50.9545	52.5064	52.5009	49.8126
	30.8678	32.5273	32.728	34.2395	32.9343	29.4777	29.8567	31.914	33.105	32.9375	31.2857	29.32	29.1728	30.8226	32.2074	32.9764	31.5457	30.5772	30.1813	29.6771	32.2348	33.2705	32.0666	31.1067	29.0718	28.9664	29.8188	32.31	33.057	32.0492	29.9075	31.8401	33.1456	35.012	34.9068	33.4471	32.3802	33.9362	35.5105	36.9906	37.8709	37.4413	36.3858	35.0054	37.6697	39.2682	41.3623	40.6256	39.0708
	28.9758	30.5764	32.0351	31.778	30.935	28.0459	29.0143	29.945	31.4656	31.9811	30.0839	28.1704	28.8272	29.5603	32.0848	31.5856	30.8995	29.3296	29.0497	29.6496	31.7779	32.2896	32.8131	30.9021	29.6463	29.9738	31.4277	33.4879	34.938	33.8423	33.1578	34.1627	36.763	40.0707	39.4833	38.5756	38.4671	41.4569	43.8693	47.0702	48.6373	48.2393	48.181	48.9123	52.0407	54.9723	58.4043	58.3759	57.2275
	27.1249	28.1694	28.3725	29.4228	27.9408	25.89	26.0194	28.0108	29.1574	29.7752	28.19	26.9722	25.9435	27.9285	31.3137	31.6309	29.2504	28.3692	27.3803	27.5591	29.3498	30.3368	30.8113	28.7767	28.1397	28.9576	29.059	31.6723	33.4511	32.3756	31.6913	32.6796	35.1523	38.3243	38.4562	37.4611	37.7544	40.29	42.4559	46.2389	48.0414	47.3879	46.6591	47.0344	50.6444	52.5647	56.2121	56.6713	55.3913
	40.4563	41.7105	41.5825	43.0678	41.5755	37.6423	38.4702	39.3787	41.8139	42.2079	39.9236	38.7048	39.3384	40.7351	43.0608	43.7249	42.4124	41.445	39.9456	41.63	41.7826	43.0928	43.3867	41.7677	39.5961	40.4125	40.5993	44.5754	45.8246	44.1937	41.7313	44.1398	46.7621	50.8294	50.3534	49.008	49.6456	52.8127	54.6499	57.7454	59.4901	60.0869	58.8707	59.8216	63.5405	66.5343	68.6614	68.9549	68.1942
	27.1373	28.7926	29.0161	29.5089	27.5836	25.5034	25.2296	26.9347	28.3227	28.0139	26.7884	24.5676	24.8352	25.8736	27.4519	27.9196	26.7857	25.0701	24.1423	24.6921	26.5022	28.0976	27.6753	25.4616	24.1175	24.7088	25.1355	27.4587	29.0328	28.0061	26.3865	28.1862	30.1659	32.1971	32.7107	31.5775	30.238	31.6127	33.9519	35.8864	37.9512	36.6477	35.5638	35.5068	37.7486	40.4126	42.0447	42.679	40.4445
	24.4955	26.2999	27.0052	27.4106	26.5562	24.1825	24.6874	25.1405	27.0475	27.3047	25.5567	24.0162	24.1601	25.6334	27.6365	28.0357	26.9326	25.1019	24.6708	25.7925	27.0575	28.4823	28.6032	26.6444	24.7958	26.2324	26.6001	29.2025	29.8255	29.656	28.2236	29.5129	31.916	34.1747	33.9295	33.1193	33.3998	35.4416	37.3909	40.9928	43.0795	42.4955	42.3711	42.6076	45.991	49.3858	51.3931	52.0977	51.5234
	22.5972	25.2574	24.8647	25.5397	25.1996	22.5078	22.5624	24.259	25.2445	25.8333	23.7068	22.2354	23.9561	24.0258	25.5945	26.5626	25.2729	23.8559	22.9325	23.8519	25.4665	26.4513	25.805	23.6936	22.8801	22.8076	24.4595	26.2321	27.0805	26.7055	25.13	26.2566	28.2973	30.8273	30.967	28.7051	28.3951	30.0167	32.5818	34.572	36.1933	36.3844	34.8089	34.9828	37.4626	40.3957	43.1269	43.4185	41.8361
	30.8516	31.653	33.6986	33.2586	33.1512	30.1761	29.6733	32.6765	34.9583	35.2828	33.0189	31.4387	31.8268	33.7996	35.0435	34.8804	35.6532	32.7046	31.0906	31.7754	34.0244	35.0065	34.632	32.7874	31.9755	33.2157	33.471	35.888	37.1673	35.3086	34.659	35.7431	37.078	40.8646	40.1124	39.5105	38.588	39.3722	41.6101	45.1974	46.3222	45.4987	44.2759	45.212	47.9491	49.5426	54.1482	54.8365	52.5943
	32.9269	34.5869	35.4721	35.7475	35.2101	31.6715	33.3144	34.2628	36.0602	35.3876	35.0849	32.7848	32.8648	35.1439	35.9653	36.7479	35.3586	33.8287	33.3744	34.2345	36.4251	37.0215	36.6324	35.2564	34.2103	35.7306	36.3625	38.8663	40.8455	38.0568	37.1443	39.7114	40.6513	43.6331	43.4941	42.3727	41.146	43.6713	45.5352	49.0406	50.4002	50.1198	49.1361	50.2066	53.066	56.0496	59.6479	59.4984	58.662
	32.8019	34.9288	35.0518	35.9536	34.8507	31.8775	32.3683	33.6269	35.3641	35.556	32.735	31.4307	31.1877	32.7779	34.5662	35.4663	33.7845	31.9388	31.7415	31.7971	34.1431	34.6098	34.6469	32.3098	31.7349	31.8931	32.7871	34.4983	36.5462	34.9164	32.9526	34.3385	35.7008	38.0623	37.4835	36.0048	35.2223	36.7934	38.742	40.6564	42.2735	40.713	40.8672	38.9335	41.7202	44.1889	45.6745	46.4881	44.6958
	40.5726	41.2049	42.0056	43.1903	40.9815	38.871	38.8684	41.4497	43.0312	43.7999	42.0559	40.0367	39.0167	41.5297	42.5836	43.1119	41.9277	40.9595	39.2519	40.3973	41.7355	43.9038	42.9866	41.7606	39.9315	42.1769	42.1338	44.9391	45.4039	44.81	42.3624	44.4069	46.0196	48.2674	48.3366	46.2253	45.0945	47.4863	49.0244	51.8053	54.3749	53.6576	52.8777	52.8559	54.7311	58.0725	59.999	60.6451	59.8622
	20.2343	23.0925	22.9531	24.0101	22.2494	20.1527	20.5064	22.0768	22.9721	23.8885	22.2092	21.6937	20.5544	23.1863	24.2159	24.5476	23.4993	21.9012	20.9477	22.0462	23.6825	24.5076	23.8212	22.411	21.1097	22.0373	22.7797	24.3161	25.7554	25.1017	23.2618	24.7496	26.6862	28.9681	28.9943	27.7425	26.9661	28.7593	30.9963	32.7733	34.2573	34.3057	33.1529	33.5012	35.7119	38.4256	40.2485	40.6256	39.1908
	30.8118	32.3031	33.0171	33.8284	32.813	29.8671	30.9959	32.6833	33.6541	33.6381	32.7106	30.6173	31.1538	32.4176	34.4693	35.3739	33.8472	32.0721	31.92	32.0158	34.1725	34.6934	34.676	32.7056	31.2291	32.6951	33.4725	35.7088	37.6681	36.1791	34.2187	36.2686	37.9177	41.7753	40.6117	39.5827	39.0356	41.5897	44.3427	46.1379	47.7458	48.4481	47.2731	48.4151	51.3107	54.2398	57.4771	57.852	57.8154
	35.2486	36.8098	37.2925	38.1753	37.096	34.9281	34.8796	36.5625	37.6448	39.012	36.9842	34.9302	35.5647	36.5375	38.6606	40.0984	37.8675	36.2307	37.1322	37.5427	39.2478	39.961	41.2949	37.6591	36.6013	38.8973	38.9043	40.9822	42.3297	41.5029	39.8002	41.6308	43.4393	45.9037	45.9356	44.561	44.0804	46.1194	48.1013	50.8219	52.6367	51.9824	50.2784	51.6269	53.7966	57.1559	60.5097	59.9057	58.4867
	36.8408	37.9244	38.3225	39.9449	38.2799	35.2342	35.683	38.3661	39.5048	40.807	38.9892	37.2134	36.6488	38.3771	41.0614	41.754	39.9939	38.6623	38.1252	39.3462	40.4615	42.8614	41.7455	40.8781	38.8802	41.5225	41.6771	44.9196	46.5118	45.0304	43.2549	45.5982	47.2959	50.2942	51.1529	49.3114	48.1554	50.9258	52.3685	54.5603	56.6002	55.9435	55.176	54.3437	57.3775	59.051	61.9693	60.916	59.8143
	40.1573	41.8405	41.5952	42.63	40.829	39.1111	40.0495	41.769	43.9558	44.372	43.2527	41.2769	42.0545	42.964	44.4134	46.5276	44.395	42.8774	42.6733	43.9195	45.5963	46.8581	45.5874	45.2161	44.2225	46.7483	47.3803	49.4233	50.1733	50.099	48.0889	50.6709	53.6112	56.2842	56.3432	55.2796	54.5223	55.3548	58.8563	61.4509	64.0944	63.5555	61.6157	62.5112	66.383	68.2575	70.6249	71.4333	69.0226
	27.8971	29.419	30.1095	31.5752	29.8337	28.1692	28.4566	29.3636	31.9617	32.1503	31.0163	29.3553	29.2892	31.4139	32.8448	35.388	33.0862	31.0695	30.929	31.5784	33.0616	35.1158	34.6662	33.4992	32.198	33.9712	35.3433	37.9658	38.8466	37.593	36.9831	37.7096	40.297	43.1015	43.4908	42.5786	42.8926	44.2107	46.7061	49.3579	51.4657	50.6243	50.0917	50.4591	52.7384	56.2441	58.1567	59.4274	57.6444
	36.5432	38.7991	39.1596	40.0502	38.9205	35.4518	37.2498	38.3831	39.6738	40.04	38.6832	36.8191	37.104	38.7227	40.1497	41.6939	39.7768	38.5244	37.4781	38.3926	40.7195	41.9491	41.1803	40.8241	38.7611	40.6361	40.4939	43.4847	44.283	43.6411	41.1195	43.5453	46.3818	47.703	47.81	46.9408	45.789	48.1496	49.0862	51.0669	53.6278	51.5281	49.9428	50.9563	52.3549	55.8021	57.739	56.1029	54.7992
	35.222	36.6105	36.8	37.2863	36.8886	33.8131	34.7454	36.3307	37.8658	37.7431	36.781	34.3058	36.4356	36.8666	38.4061	39.6573	37.7844	36.2272	35.8709	37.0621	39.1172	39.942	40.0585	37.3284	35.6871	38.1912	38.6073	41.484	41.4379	41.372	38.9251	39.9205	43.9814	45.5984	46.4653	44.055	43.491	44.9359	47.0747	49.489	49.8547	50.2079	48.8052	48.9463	51.6975	53.8582	56.2245	54.9499	53.3859
	58.0913	61.6635	62.085	62.9314	60.927	59.1496	59.7153	61.2133	63.1005	62.5533	62.5401	58.9673	60.3707	60.3512	62.9505	64.9781	63.487	62.0357	61.9068	62.5232	64.9473	65.8567	65.8819	64.4778	62.3863	64.1637	65.1628	67.9816	69.8887	67.5636	67.3617	69.0571	71.8589	73.6549	74.4054	73.0939	71.3834	74.2032	75.3064	78.033	80.1105	79.0438	77.8543	75.202	77.3406	78.4619	79.2638	80.892	77.854
	40.7644	42.9816	42.9494	43.2046	44.9327	40.2206	40.155	41.186	43.752	44.7117	42.3913	39.2505	38.5582	42.2905	43.7504	45.7083	42.0177	41.3555	41.1872	40.2699	42.7287	45.2797	44.4261	42.9279	41.2202	43.6308	43.6973	47.1218	46.8766	47.2013	45.4355	47.1127	50.921	52.6651	52.5274	52.457	51.1895	53.0411	55.5196	58.0928	60.5775	60.5483	58.9057	59.7033	61.5113	65.0188	67.0236	66.6011	67.5847
	43.5143	46.1802	46.2515	47.6487	46.1563	42.9864	43.8727	45.5866	46.7461	47.3964	45.3797	43.6174	43.5356	45.0691	47.2128	47.8823	47.1414	45.2208	44.6586	44.8123	46.9699	48.6472	48.068	46.6258	45.4863	46.5941	47.3536	49.6769	52.0825	49.9547	48.6663	50.4351	52.5664	55.256	55.6255	54.1644	53.9653	55.8483	57.6073	60.726	62.1161	62.2589	60.7623	60.2805	64.3345	65.8374	69.6141	69.5991	67.3959
	28.3088	28.856	30.6117	29.9703	29.3565	27.2948	27.2957	29.6253	30.8313	30.9513	29.1351	28.5512	27.6942	29.308	31.143	31.8467	30.8483	29.0189	28.3387	29.0299	30.5125	32.4764	31.9828	30.571	28.5543	30.465	31.5214	33.9275	35.1711	33.6214	32.4898	33.7769	36.7203	39.1808	38.9561	37.987	36.4838	39.6597	41.4622	43.2202	45.9976	44.9339	44.2824	44.2047	47.5066	50.9793	53.7519	54.1566	52.2216
	36.2821	38.0028	38.3175	39.6022	38.0476	35.4455	35.4247	37.2776	38.7584	38.9784	37.4544	35.3586	35.93	37.3815	39.4343	39.9588	38.4589	37.163	34.4952	36.8197	37.835	39.8281	39.1049	37.6052	36.6134	36.8972	38.7552	40.0496	40.6714	40.1122	38.1092	38.9547	42.0694	43.4132	43.7593	41.2426	40.1506	41.2833	43.0291	47.1287	47.9143	46.7686	44.2774	44.0316	46.0825	48.3302	48.9618	49.0639	47.1099
	41.0556	42.7586	43.4878	42.9113	42.6852	40.4283	40.6485	42.4286	44.0785	43.7625	42.1914	40.5569	41.5704	43.0747	46.0361	46.5531	44.3787	44.1701	42.4207	44.0588	46.3778	47.0262	46.1263	45.1306	43.9328	44.1871	44.7425	48.0621	48.7012	46.5234	45.1614	46.8113	47.9658	51.3781	50.2613	48.4301	47.3574	48.4679	49.0769	51.8435	53.9347	51.9045	50.7788	50.0356	51.9235	54.1999	55.0595	55.3897	52.9407
	35.8466	36.9397	37.7775	38.4459	37.0952	34.9763	35.9933	37.2545	38.0422	39.1004	37.5538	34.9207	34.8902	36.3279	39.1334	39.2454	37.9931	36.0952	35.9301	36.5905	38.5925	39.7353	39.0569	38.065	35.7878	37.9661	38.2404	40.2847	40.985	40.2855	38.1007	38.8087	41.7846	43.5056	43.4838	41.2147	41.1157	42.0779	43.7355	46.0907	47.0858	45.9567	44.2747	44.0747	45.9281	48.5986	50.4812	50.3225	47.948
	39.2088	40.2974	41.0781	42.2589	40.8722	38.1202	37.749	39.768	41.1424	41.6443	40.184	38.9378	38.6754	40.2609	41.0894	43.22	40.7747	39.7293	38.8583	39.4652	41.0843	43.3259	42.4758	40.5903	38.9597	40.3322	41.1012	43.1081	45.6785	42.8776	42.8151	42.7056	44.8332	48.1098	48.7899	48.1062	47.8178	49.8266	50.583	54.4116	57.1386	56.3263	54.705	56.2866	60.5695	62.7189	64.2993	65.5076	64.5309
	26.7853	28.5509	28.8174	29.3102	28.4029	25.7012	26.2471	27.6577	29.7524	29.535	27.6405	27.1524	26.17	27.8673	29.3469	30.1783	28.5973	27.265	26.3349	27.3831	29.2568	30.9805	30.8428	29.561	27.9924	29.5846	30.2982	31.6034	32.8002	31.8008	30.7824	31.3581	33.4877	36.1817	35.7086	34.6415	33.7804	35.8369	38.343	40.5049	41.844	41.5748	40.72	40.1319	43.6031	46.6175	49.0301	49.0308	48.1902
	67.6216	68.5231	68.7325	69.5047	67.8221	65.0792	65.1056	67.3121	69.3684	69.6895	68.4987	66.7131	66.0845	68.1998	70.3144	71.4783	68.6807	67.5893	67.3559	68.1855	69.9284	72.2271	71.2905	70.7286	68.2278	70.465	69.1115	73.4396	74.6579	72.9423	70.5549	71.5904	73.475	76.259	75.9082	73.2979	72.7859	74.6513	73.6363	77.8708	78.6721	77.7043	74.7057	74.6933	77.048	77.9645	80.7888	79.5969	76.9324
	32.0018	34.7493	34.7192	34.7527	33.9881	31.6389	32.2456	33.2825	36.038	35.8144	34.9674	32.3057	32.8063	34.201	36.3669	37.6247	34.6782	33.6382	33.0105	33.2811	35.4808	36.6344	36.1421	34.2443	33.8678	34.2899	34.404	36.7959	38.4968	36.8884	36.3534	37.7658	39.5641	41.983	41.3848	39.3423	39.1479	41.4868	42.1557	45.1857	45.9302	45.2822	44.3182	44.1623	45.444	49.4089	51.0595	51.6327	48.3114
	47.4899	49.1102	50.3989	51.5556	48.9078	47.1205	47.0463	48.3507	49.9914	50.8714	49.4737	47.3154	48.0577	49.9334	50.5283	51.8303	50.3045	48.9399	48.0662	49.5337	51.3174	52.1423	52.8735	51.7723	49.2995	51.079	50.8274	52.5048	54.9986	53.5696	51.0073	51.4899	53.5222	55.7137	55.0519	54.52	52.7251	54.0438	55.5429	57.3324	58.7641	57.0365	56.2686	54.4954	57.2466	58.9392	61.2101	60.3698	57.5346
	32.6537	34.503	34.2964	35.2272	35.1994	32.4758	31.9594	34.0091	35.5895	36.6716	34.2608	32.966	31.9837	34.6747	35.8367	37.0467	35.8022	33.8107	32.6934	33.5167	35.9143	37.6985	36.883	34.3209	34.8058	36.6276	37.3773	39.8185	40.3433	40.0872	38.3284	40.2318	42.1173	45.3793	45.5379	43.3696	43.3087	45.4862	47.7686	51.8284	53.126	52.0735	52.0219	53.2114	56.0795	59.3133	62.5583	62.8438	61.7504
	54.8381	57.2606	56.5199	57.568	56.2816	53.664	53.5946	55.6044	56.6453	57.0707	55.7952	54.3214	54.1818	55.3538	57.8838	58.1658	56.1044	55.2897	53.8421	55.0889	57.2264	59.7231	59.0509	56.4007	54.7457	56.3549	57.1292	59.4772	61.1501	60.1832	58.9429	60.7074	62.8433	66.0403	66.9934	65.7097	65.7197	67.3932	69.3525	73.116	75.4933	74.9011	75.7088	76.2912	79.7371	83.7165	86.7439	87.1912	86.9983
	31.7958	33.7603	34.337	35.188	34.1071	31.4678	31.9372	32.644	35.6166	35.3603	34.4362	32.919	31.639	33.792	35.8487	36.0585	34.1586	33.46	32.7934	33.8178	35.6857	36.5641	36.8503	35.0471	33.6407	35.9982	35.1424	38.1407	38.2933	37.0077	36.1328	36.5639	38.6051	40.2263	40.3295	39.482	38.714	39.5422	41.3385	43.8099	44.6637	43.2909	42.3423	43.0257	45.4997	46.1992	48.7127	49.0306	47.3247
	41.1217	43.1985	43.1283	43.947	42.2622	39.2849	40.304	41.8158	43.4265	44.2499	43.5601	40.7057	41.1552	42.0922	44.5292	45.1224	43.8139	41.2757	40.688	42.5633	44.1852	45.7897	45.3238	44.4101	42.1611	43.5462	45.2926	46.9214	48.2608	46.6722	44.1333	45.7045	48.1047	49.8403	49.0621	47.2259	46.0077	47.4121	49.1279	51.2982	51.0597	51.4078	48.6475	47.8137	49.3077	51.4298	53.5819	53.6065	50.0844
	33.1833	34.7275	35.5535	35.4203	34.5061	31.8554	32.2352	33.5288	35.049	35.3533	33.69	31.8606	31.7913	33.1442	34.7489	35.3073	33.6703	32.7431	31.0217	32.1467	33.8517	35.9391	34.8131	33.4042	32.2696	33.3154	33.7688	36.9588	37.9238	37.3691	36.1195	36.821	40.2908	41.9422	42.2106	40.7396	40.3904	41.4415	44.1548	46.8328	48.1174	47.7819	46.7276	47.0327	50.2758	52.1122	54.5443	55.029	52.7715
	34.7048	34.7356	35.2848	34.4153	34.9165	34.3607	34.2908	34.3943	34.2273	33.9914	33.8003	33.315	32.9508	33.526	33.9033	33.3942	33.6521	33.5105	33.3432	33.0612	33.5343	32.6738	32.6701	32.23	32.8371	31.5814	33.1405	35.248	34.0236	36.6115	37.0271	38.2843	38.9811	38.872	39.0895	39.9834	41.1071	42.0514	43.915	45.3107	46.6814	47.4028	48.7106	49.2493	50.3091	50.1574	50.4947	50.6072	51.3678
	35.1897	36.1367	36.6422	35.0404	36.1383	35.3799	36.0233	35.2702	35.0085	34.9681	34.7166	35.1081	35.2324	35.3444	35.6292	34.22	34.8169	34.5642	35.3033	34.4674	34.1872	33.4578	33.7289	33.4742	33.613	33.3307	34.1079	35.749	34.0281	36.2986	37.8256	37.8036	39.4639	39.1008	40.1692	40.2566	41.2353	42.9272	44.6994	46.2101	48.2107	49.6198	51.0797	51.8733	52.7019	53.6694	54.0695	54.3594	56.1744
	44.8714	44.499	44.5417	43.589	43.1472	44.1302	43.8713	42.4772	42.9257	42.6776	42.8366	42.3553	42.7064	42.2664	42.94	42.2333	41.6371	41.9931	42.2563	41.8452	42.7054	42.6039	42.5335	41.3614	41.1462	39.0867	41.2272	42.9405	42.2656	43.7918	44.7083	45.7645	46.5844	46.5137	47.2696	47.0875	47.8801	48.8468	49.8623	51.6164	52.071	53.7145	53.742	53.9854	54.7865	55.6738	55.0681	55.4614	56.2827
	34.7244	34.3874	34.3437	34.0695	34.8245	34.095	34.6913	33.4653	33.9773	33.2925	32.774	33.6577	33.7209	33.6781	34.0312	33.6861	33.3788	33.809	33.3704	32.8975	33.5604	33.0511	33.6443	33.3002	32.6179	30.6734	31.0396	33.7137	32.4019	34.007	34.9016	35.9703	36.6503	37.369	37.6302	37.6944	39.3535	40.45	42.3562	42.1389	44.3583	46.1275	46.2632	46.9542	48.2517	47.7096	49.1003	48.7433	49.1848
	37.242	37.0859	37.377	37.3619	37.1695	36.7734	37.0332	36.9719	36.7039	36.5989	36.1639	36.7174	36.3305	36.981	37.398	36.917	36.5211	35.9329	36.8078	36.1291	37.0282	36.2416	36.358	35.8643	36.11	35.0452	36.2762	38.2873	36.9513	38.8139	39.1703	39.6325	40.3908	39.2982	39.832	40.2086	41.0026	42.3885	43.7606	44.468	46.3813	47.3995	48.3666	48.5215	48.7733	50.2066	50.7275	51.0207	51.4216
	56.762	57.0642	58.5405	56.6357	56.9919	57.4248	57.6271	56.9215	56.8618	57.0875	57.0401	57.1935	56.3563	58.2977	58.1482	57.6763	57.3386	56.8215	57.5295	57.2143	57.069	57.5668	57.4332	58.0467	57.6167	55.8264	57.7314	60.0492	56.7986	59.4492	59.5857	59.8045	61.4027	61.1437	61.5409	61.0248	61.6329	62.6429	64.523	64.8728	65.5391	67.3524	67.8074	68.5577	69.9911	68.939	70.068	71.0386	71.1048
	39.0648	39.377	39.5102	39.2754	39.3499	38.4843	38.9216	38.0687	38.6634	38.4519	37.9038	38.4023	38.6269	38.1796	38.5344	37.8955	38.1064	38.6531	38.6063	37.4668	37.7544	37.7203	38.1961	37.599	37.8626	36.5745	37.5151	39.4385	37.7615	40.3546	40.5789	41.8788	42.545	42.2012	42.8415	43.4871	44.4042	45.867	47.6364	48.3193	50.9457	52.5294	54.7418	55.4827	57.2337	57.5656	59.3977	60.3564	62.1839
	38.9946	39.5811	39.2717	38.8737	38.7869	39.0245	39.3621	39.1108	38.8911	39.2813	38.8189	39.4115	39.1157	39.3728	39.4828	38.7689	39.6518	39.1285	39.1925	38.8142	39.2158	38.582	38.5755	39.2342	39.6587	38.4886	39.9867	41.9324	39.709	41.9968	42.9399	43.8032	44.045	44.0017	44.4119	44.6924	46.0292	47.2691	49.2949	50.441	52.6819	53.499	55.5609	56.374	57.0021	58.0313	58.3531	58.7941	60.9829
	32.3517	31.9421	33.645	32.1858	32.7654	32.2956	32.6995	31.6722	32.4176	32.0495	32.0508	31.7831	31.6739	31.8063	32.3402	31.8432	32.1437	32.0314	31.9789	31.6003	31.4762	31.4902	32.686	31.2772	30.9025	30.0757	31.7048	33.4014	33.1355	34.5354	36.1069	37.3744	37.7292	38.439	39.1694	40.6438	42.1899	44.0607	46.8707	48.3177	50.398	52.0482	53.7682	55.0862	56.2438	57.9976	58.8191	60.5737	62.508
	39.4907	38.943	39.955	39.683	39.2524	38.8456	39.1286	38.9674	38.8373	38.9828	38.6836	38.2462	38.6534	38.5662	38.8949	38.882	38.788	38.2369	38.8384	38.6377	38.9061	37.7927	38.1546	38.1916	38.4413	37.4789	38.9055	41.3885	40.0545	42.3829	43.1626	44.3986	45.8173	46.4051	47.7761	48.5218	51.2045	52.441	54.8788	56.885	59.6559	62.0395	63.7912	64.9005	66.411	68.0341	68.4562	69.9959	71.6355
	36.0063	35.936	35.7867	35.6242	35.4109	35.251	35.4195	35.2693	35.2346	35.1609	34.9464	35.201	34.0048	34.8626	34.7203	34.4247	34.1166	34.3606	34.0776	34.1186	34.7169	33.5221	34.0882	33.7801	33.2829	32.4926	34.2995	35.9654	34.8	37.5232	37.9618	38.83	41.1904	41.2177	41.8221	42.8387	44.9748	46.6973	48.517	51.1374	53.1791	55.3445	56.5514	58.1164	59.9479	59.7466	60.7539	61.9075	63.4336
	30.6432	30.8619	30.7182	30.7875	31.3196	30.4863	31.6539	29.8211	30.0205	30.8778	30.3315	30.5432	30.5966	30.8874	31.6038	31.078	31.3704	31.7941	31.4644	31.4102	30.9608	31.2329	31.0031	31.2798	30.5615	28.9931	30.0039	32.5755	31.5335	33.9834	35.2243	37.1352	37.205	38.2404	39.724	39.6961	42.7277	44.3995	46.4646	48.4662	51.4389	52.5744	54.236	56.2766	56.8607	57.1139	59.1027	59.3264	60.9356
	37.9728	38.089	38.2369	37.3112	37.2972	37.2506	36.9883	36.7007	37.0072	37.0851	36.4771	36.6196	36.6414	36.5493	37.0911	36.4557	36.0112	36.5374	36.8786	36.2644	36.2316	35.6695	36.1233	35.4677	35.3779	34.2988	35.957	38.6422	38.2494	40.055	41.9898	43.8547	44.8471	45.4145	47.5882	48.2343	50.59	51.598	54.3503	56.5687	59.1471	60.797	61.6884	63.9786	64.8707	65.5307	66.8961	67.424	68.9255
	19.9968	19.7955	21.0948	20.3977	20.0521	19.8925	19.8626	20.1341	19.6251	19.8278	20.2515	19.8845	19.624	20.1533	19.5481	19.5394	19.8941	19.3814	19.656	20.0182	20.2394	19.5811	19.2517	19.6465	19.8356	17.428	18.8902	20.5644	19.2317	21.0375	21.7478	21.7133	22.6411	22.551	23.212	23.2316	24.2228	25.3033	26.936	27.6427	29.9534	30.7489	31.7599	32.5371	33.592	33.9305	34.3461	34.4082	36.2521
	33.2948	32.99	33.5439	33.3633	33.3776	33.205	32.9948	32.6206	33.0721	32.4961	32.6121	32.3665	32.9908	31.631	32.527	31.9185	31.3132	31.9345	32.0559	31.5332	31.6441	31.6775	31.7484	32.1338	31.1356	29.8508	31.3725	33.4027	32.913	34.6524	35.5803	37.2619	38.9148	38.3727	40.087	41.2555	42.7557	43.7667	45.6598	48.5207	49.4787	51.5658	52.4064	54.2076	55.4396	55.0684	56.2496	56.257	57.8593
	22.8889	23.1071	23.6839	22.911	23.0382	22.7513	22.7037	22.7057	22.9549	23.1193	22.8013	22.3709	22.469	22.7867	23.2168	22.6388	22.9204	22.1348	23.0648	22.2971	22.918	22.2722	22.3327	22.523	22.1205	21.0344	22.4476	24.3813	23.6101	25.5829	27.4624	27.6923	29.4424	30.3112	31.4127	32.388	34.1169	35.4533	38.278	39.6805	42.5777	44.3208	46.2578	48.0526	49.2595	51.4158	51.1294	52.8728	54.8884
	27.5156	27.8318	27.7844	27.4865	27.6168	27.0021	27.7437	27.3677	27.2123	26.937	26.9187	27.1381	27.4191	26.7651	27.6504	26.8531	26.8704	26.8235	27.0368	26.7726	27.0978	26.8675	26.7239	26.3425	26.401	25.143	25.9118	28.3925	27.247	28.9419	29.5671	30.2848	30.8927	31.4485	31.8709	32.6085	33.9546	34.8933	36.7316	37.9584	40.0056	41.3619	42.7496	44.113	45.1006	45.4885	46.2522	46.5898	48.264
	32.8106	32.579	33.4925	32.0311	32.9017	32.3562	32.2567	31.7337	32.1707	31.95	32.6495	33.1542	31.9862	31.8681	31.9693	32.0976	31.9142	32.2105	31.7	31.1736	31.2446	31.3558	32.5288	31.2119	31.9775	30.9454	32.0951	34.3105	33.3831	36.4846	37.1211	38.4019	40.6068	40.3805	41.3661	42.4193	44.6064	47.2138	49.068	49.6547	52.9629	55.2655	55.7796	57.4607	57.8164	59.2187	58.7909	59.388	61.2138
	22.5221	22.5444	23.0794	21.1171	21.4846	21.7483	22.0489	21.773	21.0127	21.7375	21.5161	21.6467	21.8063	21.7308	21.4261	20.7439	20.8832	21.5186	21.8498	21.0926	21.6079	20.6509	21.8373	21.3075	21.1079	20.8116	22.3386	24.7624	22.8989	25.6701	26.7364	28.0067	29.1492	29.4938	31.8327	32.0593	34.4222	35.5034	38	39.4408	41.3875	43.4483	44.3446	46.0534	46.583	46.2447	47.8085	47.9686	49.1044
	19.4077	18.8059	19.6858	19.4839	18.7638	18.9339	19.0407	18.9656	18.5798	19.0202	18.6023	18.6009	19.4139	18.6162	18.9644	18.1565	19.2033	18.2973	18.6267	18.2802	18.3639	18.1779	18.2951	17.911	18.2032	16.9138	17.982	19.9665	19.282	21.1517	21.7753	23.0922	24.1348	24.0025	25.7391	25.6386	26.7905	28.6194	30.2145	31.4988	33.8996	35.6133	36.7658	37.1877	38.4114	39.1099	39.5141	39.4861	40.7339
	28.6823	28.1994	28.1376	28.2064	27.9014	28.2721	28.6643	27.7353	27.995	28.5006	28.1591	28.3232	28.0909	28.1144	28.7641	27.948	28.1609	27.3669	27.7281	27.2487	27.8783	27.1254	27.6291	27.0482	27.3743	25.6122	27.0407	29.055	27.8876	29.7317	30.3889	31.3272	31.8731	32.104	33.1685	33.4127	35.08	35.5932	37.9156	38.7106	40.7	42.0161	42.3608	43.1901	44.9239	45.1059	45.4654	46.0673	46.6379
	29.5545	30.6149	30.3126	29.717	29.701	29.9035	29.9338	29.5312	29.6111	29.1579	29.6094	29.9965	29.6195	29.4959	30.0649	29.4801	29.3413	30.1401	30.2014	30.0962	30.4849	28.7325	28.9833	28.9469	29.9224	28.3451	28.912	30.9281	29.339	31.2083	31.675	32.6668	33.4345	34.2165	34.0904	34.186	35.7237	36.9825	38.887	40.692	41.7756	43.8322	44.0534	46.729	47.0048	48.4878	49.8967	51.1707	53.5826
	20.9287	20.9329	21.0979	21.2785	21.1777	22.0482	21.7876	22.1096	22.6103	22.3016	22.2524	22.1063	21.705	21.2063	21.3225	20.9203	21.0854	20.3712	19.99	20.5106	19.9472	18.8791	18.801	18.4368	17.6025	21.2544	21.229	22.3991	23.6167	24.9191	27.8739	28.8054	31.0514	32.6301	35.2559	37.3242	39.0813	41.7903	43.7619	46.3552	49.3106	51.5693	53.8063	56.4015	58.2704	61.1108	63.4625	66.7774	69.3445
	44.1678	43.3771	43.7103	43.5118	42.9083	43.8463	44.6069	43.6659	44.0983	44.4382	44.0981	43.2224	42.9994	42.4686	42.6668	41.8865	41.7886	40.9195	40.5334	40.8927	40.1136	38.5767	38.6313	38.1019	37.3831	39.0297	38.799	39.8859	41.1159	41.7298	43.591	45.9972	47.92	50.3395	53.4781	55.9781	57.931	61.3464	63.8767	66.2654	70.8763	73.6063	78.1816	81.3106	84.6046	88.1011	91.7852	95.1548	99.1805
	25.8367	25.5929	26.0625	26.2836	25.9694	26.9612	26.8697	27.0734	26.9173	27.8248	27.3591	26.9064	26.7985	26.93	26.2398	26.6214	25.7176	24.9796	24.4403	25.3129	24.9451	23.6006	23.4759	23.1119	21.9469	24.1635	23.8086	23.8189	25.7713	26.3635	30.4799	29.5853	31.4189	33.8403	36.1953	38.5044	40.3253	43.2072	45.8069	48.9834	51.758	54.847	58.688	61.2105	64.5082	67.9229	71.0487	74.8487	77.8345
	28.9931	29.2601	29.6722	29.6522	29.4354	29.423	29.3649	29.5698	30.3276	30.0734	29.9622	29.4152	29.1527	29.8891	29.2389	28.6396	29.2207	27.2946	27.0581	27.2949	27.3915	24.9802	26.0311	25.3928	24.8012	29.2714	28.5995	29.6368	29.2295	30.6529	40.1907	35.7436	36.4082	40.1897	41.6307	44.3622	46.2361	47.9873	52.0351	53.0688	57.1601	60.1913	65.756	68.5063	72.5753	75.992	79.1791	83.1405	86.4128
	34.237	32.9539	33.6318	32.811	33.6921	34.028	33.9594	34.6997	34.6888	34.4772	33.9914	33.3728	33.3213	33.0522	32.8516	32.5926	32.3944	31.6949	31.8177	32.446	32.125	30.2836	29.7687	30.2769	28.9853	30.5611	31.1834	32.1154	34.9422	37.044	36.6605	42.6785	44.5769	48.2931	50.5148	54.1711	58.4623	61.6264	64.6922	68.8013	73.4958	75.7647	80.3527	84.532	87.3618	91.3557	96.2943	99.5236	104.752
	21.3639	20.0437	20.8208	21.0445	20.8708	20.633	21.6488	21.3834	21.7822	22.115	21.4559	21.3324	20.9946	20.9049	20.9168	20.9069	20.4515	20.1201	19.1203	20.0586	18.9385	17.6012	18.4455	18.154	16.966	21.0355	21.0115	21.1058	22.2229	22.3688	26.234	25.1832	27.0682	29.107	30.2843	32.6558	34.2031	35.5579	38.2904	39.9768	42.9613	45.5995	47.3735	50.3501	52.0393	55.2862	58.3137	60.9067	63.7907
	23.54	23.6358	22.999	23.9786	24.5568	24.7028	24.8031	24.5598	24.4854	24.9343	24.9456	24.581	24.5942	24.7962	24.1163	23.9627	23.4656	23.6405	22.3557	23.1236	22.5931	21.4557	21.8591	21.3013	20.8167	23.2108	23.6251	23.2953	24.7514	24.8929	28.4636	27.7734	29.9561	30.4518	32.9892	34.1989	36.7401	38.4702	40.8014	43.1757	44.0579	47.3052	49.9435	52.8763	54.699	57.6193	59.9526	63.8157	65.6397
	23.4011	22.4709	22.9865	23.3003	23.4549	23.9638	24.536	24.5562	25.151	24.9639	24.8786	24.7877	24.2481	24.4149	24.4049	23.4667	23.6776	22.8639	21.8756	22.148	21.7194	20.993	21.0494	20.6163	19.9593	21.9998	22.9455	24.3402	25.8733	27.5146	28.341	30.6714	33.6769	35.6902	38.3569	41.2505	44.2703	47.3475	49.611	53.0101	55.1557	58.1714	60.9817	63.517	65.6685	67.9762	71.3629	74.2636	76.6033
	26.1117	25.7342	26.4065	26.5434	26.9719	26.7612	27.7839	27.5699	27.5473	27.4724	27.5674	27.5804	26.2973	26.5884	26.4887	25.8742	26.2278	25.2343	24.6528	25.631	24.8254	23.9548	23.6437	22.8933	22.3606	24.7129	25.5635	27.4707	29.8791	31.142	32.5688	36.9227	40.8934	43.338	46.6849	49.6999	52.8273	56.2592	59.1789	62.2393	65.698	69.371	73.6153	77.1033	80.0872	83.2878	86.745	90.5456	93.1301
	25.083	24.2285	24.7906	24.9447	24.7634	26.3746	26.2728	26.717	26.6367	27.2734	26.7066	26.5268	26.2236	25.4715	25.6277	25.8685	26.3523	26.2379	25.1376	26.6329	26.1521	24.5586	25.0021	24.0244	23.1645	25.9823	26.4988	28.322	31.0764	32.3612	35.1942	37.8033	40.1614	42.8153	45.1892	47.9467	50.5011	53.5877	56.2443	58.5282	61.6373	64.585	67.2089	70.5114	73.18	76.3335	79.2704	81.52	85.0821
	34.2209	33.071	33.3208	33.294	33.5812	34.2091	34.645	34.831	34.7244	35.0409	34.0467	34.5878	33.6214	33.969	32.9853	33.2449	32.8727	32.2317	30.8035	32.4635	30.9472	30.4579	30.6602	29.924	29.1579	32.0667	32.9886	34.8078	37.8742	40.1645	45.1057	46.7191	49.0215	53.4721	56.829	60.2849	63.2781	66.2578	70.6264	73.9519	77.9193	81.8431	86.3483	89.9456	93.5924	96.1783	101.595	105.099	108.559
	54.1601	52.0086	52.7705	52.8073	52.5547	53.373	52.5832	53.2021	53.1488	52.6048	52.6586	52.146	50.8432	50.934	50.4172	50.0521	50.9556	48.7879	49.0126	50.4709	49.2154	48.0528	48.6911	47.1016	45.404	49.8629	51.5654	53.6939	58.15	59.6251	66.7103	69.881	72.6587	76.7856	80.9718	85.3424	90.0608	94.3376	99.339	103.011	108.567	113.369	116.837	121.362	123.711	127.464	133.668	137.704	142.157
NS shRNA+E-Syt1	28.5061	27.9137	27.8613	28.0397	28.0737	27.9456	28.2122	28.3084	27.4879	27.974	27.7911	28.0643	28.1017	27.8786	28.1159	28.1797	28.2363	28.2829	28.3742	28.2883	28.3672	28.9424	29.462	29.0734	29.3527	29.3935	29.0799	30.1827	31.6962	33.9006	36.972	38.5221	41.4694	44.6689	46.8136	50.7187	53.4533	56.8119	59.9656	62.9276	66.9474	70.2307	73.3624	77.2002	79.9315	84.0814	86.7791	89.4712	92.4432
	35.5354	34.9871	34.3763	34.8286	35.4471	34.738	34.5204	34.3155	33.964	34.0313	33.8236	34.82	33.991	34.2395	34.6177	34.6139	34.5431	34.9375	34.7778	34.8966	34.8939	34.7872	35.6767	35.1871	35.6453	34.9746	35.4908	36.2232	38.0297	39.9853	42.8161	43.9003	47.2189	50.008	52.5027	56.0779	59.2484	62.1525	65.1363	68.4984	71.4981	75.7662	79.2001	82.3662	85.1529	89.2509	91.7048	94.4527	97.5823
	28.1824	27.8193	27.4368	27.7542	27.6199	27.5549	27.3426	27.5056	26.905	26.7904	26.6367	26.2857	26.3721	26.1669	26.2474	26.0176	26.4112	26.0202	26.1467	25.9701	26.1527	26.3321	26.7106	26.5262	26.642	26.1493	26.3791	27.5869	29.0358	30.493	33.6704	34.2637	36.9483	38.9506	40.7709	43.6255	45.7447	48.1517	50.2272	52.4814	54.8566	57.4408	59.9335	62.4164	64.2755	66.9289	69.3337	70.7544	72.6935
	25.2725	25.3433	25.1867	26.3578	27.1918	27.8053	27.8705	28.5846	28.3725	29.0091	29.0605	29.5342	29.8882	29.915	30.0824	30.0027	29.8535	29.2855	29.1563	28.9558	29.1202	28.738	29.1084	28.5131	28.6781	25.922	26.1678	26.955	28.0317	29.5815	32.368	33.0289	35.6781	37.3429	38.8218	41.2268	43.4256	45.5281	47.7574	49.9709	51.9257	54.5522	56.4743	59.3391	60.7861	63.9865	65.9592	67.4527	69.301
	33.9587	33.9446	34.3431	35.2667	36.8843	36.7048	36.3948	37.5691	37.386	38.3128	38.0209	38.6869	38.4458	38.6569	38.97	39.0011	38.2547	38.0333	38.0301	37.3523	37.3611	37.4665	38.1699	37.1792	37.1879	34.6642	34.5957	35.5209	36.609	38.2244	41.0946	41.8004	44.3418	46.5259	47.8037	50.7596	52.4978	54.9473	56.4498	58.8098	61.1285	63.9401	65.7246	69.0465	70.2367	73.0702	75.1743	76.5768	78.9746
	52.2723	51.5102	50.7948	50.9419	51.3298	51.3321	50.9536	51.2566	50.4215	50.3804	50.1288	50.769	50.554	50.9983	50.8679	50.979	50.7641	51.1845	51.8464	51.236	51.6947	52.4883	53.1755	52.4661	53.0753	52.0471	52.2298	53.3382	55.5763	57.9005	61.7705	62.6963	66.7687	69.3553	70.7653	74.0219	76.0695	78.9103	80.6198	82.9892	84.3652	86.486	88.0874	89.8778	90.7707	93.1973	94.3469	94.2567	95.34
	62.8358	62.4207	61.8263	61.2718	61.9607	61.4529	61.1841	60.8972	60.1877	60.1099	59.8517	60.1112	59.7831	60.0582	60.3017	59.944	59.6037	60.0707	59.9069	60.1821	60.4961	60.7299	61.6534	60.9914	61.0049	61.2403	61.7903	63.6751	65.7322	68.4495	72.2864	73.3791	76.8033	79.1435	80.4089	83.0731	85.0417	86.83	88.6334	90.9776	92.5093	94.6433	95.9429	98.2963	99.4828	102.463	103.323	104.119	105.686
	27.9481	28.1939	28.4846	28.4064	28.2676	28.9807	28.9013	29.2167	29.7111	30.0137	30.2427	29.8908	29.8245	30.2926	30.4144	30.265	30.6177	31.1814	31.1478	31.0328	31.065	31.6499	31.7824	31.8395	31.8119	32.7972	33.7533	34.6921	36.1245	37.4694	39.3971	41.31	43.4476	45.4545	47.0112	48.9172	51.9816	53.8625	56.5355	57.4805	60.2687	62.1555	64.0597	65.4097	67.2924	69.0889	71.3591	72.6895	72.6853
	23.2141	23.1819	23.6033	23.3352	23.6151	23.5029	23.8499	24.1817	24.9073	24.9708	25.2067	24.9496	25.1255	25.5091	25.5316	25.4737	25.7866	26.1396	26.303	26.4948	26.5145	26.8563	26.6101	26.985	27.1469	27.7222	28.0947	28.331	29.6361	30.3811	31.5691	32.559	34.3469	35.5208	36.3965	37.8443	39.0315	40.9224	42.4697	43.3215	44.577	45.8223	47.2142	48.2176	49.3988	50.4587	52.4202	52.8022	53.1641
	43.5238	43.4029	43.6782	44.2507	43.1165	44.2692	43.855	44.6749	45.2708	45.6566	45.2606	44.9756	45.9407	45.6634	45.7244	46.1118	45.3317	46.0637	46.1655	45.7039	45.1288	45.8321	45.3793	46.3666	46.549	48.415	48.744	50.0578	50.9138	52.0756	53.4879	55.5117	58.1188	59.9727	60.7946	62.3543	64.5871	67.8794	70.6372	71.8656	75.2318	78.0903	79.1916	81.0059	83.463	86.3392	89.0898	89.817	91.0146
	44.6546	44.5954	44.4729	44.1867	44.0761	44.0222	43.7541	44.3228	43.9621	43.7365	44.3919	43.187	44.5942	44.0449	44.4076	44.2435	43.7978	43.9574	43.774	44.3115	43.8776	43.9745	44.4563	44.4949	44.5144	45.3944	45.3184	45.5552	46.993	48.6876	50.1614	52.2312	53.3045	55.1611	57.3909	59.2223	61.5599	63.8838	65.8253	67.9489	70.0543	71.8865	74.4396	76.0531	77.5963	79.8321	82.1823	84.0443	84.9245
	33.2644	32.4432	33.1705	32.4697	32.2604	32.0597	32.4738	32.8894	33.365	33.0973	33.2685	32.7916	33.4599	33.8757	33.487	33.1973	33.463	33.0562	32.9303	33.1981	32.4287	33.0104	33.5422	33.4973	33.4544	34.6445	34.4442	34.9845	35.8096	36.4993	37.9261	39.5633	41.8254	43.2174	44.2445	46.3063	48.1128	51.4079	53.0349	55.6001	58.0136	60.6485	61.3866	64.0617	65.6778	67.9968	70.9484	71.3882	72.842
	40.1734	39.7998	40.816	40.2191	39.6965	39.6882	39.4618	39.39	40.0378	39.799	40.1123	39.882	40.0091	40.3403	40.3133	40.1824	40.2976	40.717	39.987	40.1507	40.126	40.2365	40.7985	41.0256	40.8749	43.4773	44.3372	45.4258	47.1355	49.209	51.1087	53.7707	56.3477	58.9098	61.6476	64.3639	67.6179	70.6533	74.9486	77.4706	81.4717	84.8547	87.661	90.6303	94.4477	97.6431	100.415	103.188	104.097
	14.2773	14.0414	14.5555	14.1282	14.3789	14.501	14.4218	14.7147	15.2846	15.6568	15.5883	14.8295	15.66	15.8306	15.8086	15.8199	15.841	16.0226	16.116	16.0791	15.7763	16.1514	16.1723	16.5023	16.5493	24.3475	23.9398	24.137	25.0664	26.0725	26.7414	28.372	28.9011	29.6358	30.7338	32.4187	34.1492	35.8719	38.2684	39.8874	42.4692	44.2206	46.1948	48.3187	50.3177	52.8514	55.1149	57.1371	58.393
	25.1183	25.1128	25.3207	25.3824	25.6032	25.8638	25.928	26.0971	26.9564	27.1036	27.2206	27.244	27.852	28.24	28.3432	28.4108	29.0358	29.0508	29.3383	29.4072	29.4246	29.6931	30.6319	30.5195	30.8659	28.6437	28.6633	28.5606	29.0366	29.9023	30.3871	31.199	31.895	32.6129	32.5768	33.9744	34.9819	35.8998	37.043	37.8057	39.1456	40.3269	42.0256	43.1412	44.1787	45.9586	47.1104	48.547	49.1581
	33.6832	33.5934	34.4358	34.1022	34.4825	34.469	34.6484	34.9055	35.7538	35.5817	35.9869	36.1379	36.0289	36.4975	36.9809	37.2219	37.1651	37.823	37.499	37.471	37.261	37.332	37.5789	38.2751	38.3241	35.7337	35.9628	36.1776	37.4987	37.864	38.2492	40.3004	41.2167	42.6904	43.9457	45.644	47.6724	49.0691	51.6571	54.0214	56.4727	59.13	61.6274	63.9774	66.4888	69.5275	72.5007	75.2284	77.0216
	42.8542	42.7392	43.3829	42.6363	42.2345	42.7646	42.8611	42.6554	43.2496	43.6531	43.6763	43.4546	44.7944	45.5771	45.2716	45.3245	45.1752	45.0334	44.9771	44.3127	44.6756	44.1607	44.9512	45.0119	45.1025	34.6193	34.8449	35.1991	36.5355	37.507	38.6154	40.2889	42.1699	44.078	45.4851	47.366	49.5193	51.8949	54.3647	56.7464	60.0761	62.432	65.5542	68.4663	71.2602	74.8017	78.2057	80.6522	82.5813
	36.8403	36.4244	37.2777	36.8743	36.5866	36.5923	36.716	36.6031	37.3762	37.6691	37.6649	37.7076	38.1547	38.7218	38.7779	38.7314	38.6356	38.6456	39.0157	38.5856	38.7153	38.9097	39.2951	39.478	39.8438	28.3616	28.075	27.8385	29.4894	30.1866	30.7272	31.9466	33.367	34.8961	36.2782	37.516	39.1377	40.2143	42.5306	43.8288	45.858	47.9413	49.9661	51.913	54.0107	56.3845	58.7194	60.4031	61.3506
	28.4163	28.0357	28.6783	28.0283	28.401	28.2663	28.1493	28.5377	29.0068	29.3596	29.1383	28.5079	29.0081	29.4175	29.5295	29.2277	29.1777	29.5194	29.4767	29.3045	29.4963	29.3935	30.0242	30.3081	31.0711	28.4254	28.484	28.7562	29.5319	30.6135	31.487	33.0743	34.7157	36.3317	37.6138	39.885	41.6467	43.4616	45.7563	46.8489	49.3494	51.0689	52.8731	54.7198	56.5778	58.6117	60.325	61.6021	61.9975
	31.8741	31.8079	32.2298	32.1675	32.4778	32.3668	32.8172	32.6505	33.0184	33.0617	33.6864	33.671	33.6484	33.9262	33.7409	34.2158	34.8279	34.5034	34.3403	34.7064	34.6951	34.908	35.3075	35.7253	35.7089	35.8781	35.6507	36.0329	36.6719	37.3555	37.9248	39.0911	39.0893	40.0172	41.0174	42.2549	42.7621	44.3283	45.4217	46.1491	47.4082	48.3532	49.7047	50.9657	52.4788	53.8337	54.4407	55.5647	56.6248
	19.8415	19.9033	20.2287	20.3023	20.7127	20.8075	21.221	21.2638	21.2031	21.5094	22.1352	22.2796	22.3508	22.5443	22.573	23.1718	23.6964	23.5927	23.6579	23.8369	23.9311	23.9792	24.6496	24.6556	24.4192	25.8988	25.6271	25.8726	26.5111	27.181	27.7652	28.5078	28.5265	29.2852	29.9345	30.9884	31.4805	32.9661	33.8823	34.5486	35.5906	36.7533	37.5687	38.4762	39.9206	41.2595	42.3241	43.4699	44.5094
	55.0687	55.2634	55.9021	55.4374	55.8754	56.0002	56.1532	56.0966	56.6121	56.733	57.1744	57.431	57.3748	57.4117	57.5032	57.4663	58.7656	58.3101	58.1668	58.1971	58.5203	58.5344	58.5191	58.7971	58.6275	54.2608	54.208	54.43	55.3936	56.8029	57.83	59.2134	60.0243	61.2526	62.9564	64.6988	66.3446	68.8861	70.5258	72.1395	74.3872	76.0256	78.3017	80.4012	82.878	85.6274	87.1159	89.3734	91.4195
	76.4893	76.7612	77.0646	76.7701	77.301	77.1549	77.4104	76.8859	77.4945	77.744	77.8194	77.6828	78.1075	77.807	77.9908	77.73	79.0873	78.6143	78.6261	78.3536	78.6103	78.4867	78.7459	79.1888	78.5767	72.0689	71.7203	72.4235	73.9808	75.1131	75.78	77.4606	78.2735	79.6145	81.7403	83.5279	85.52	89.1085	90.7384	91.9305	94.2938	96.3675	98.8951	101.787	103.94	107.296	109.622	111.913	114.375
	50.8961	50.6877	50.9298	51.015	51.0665	50.9078	51.5192	50.9615	50.972	51.1267	51.6214	51.3486	51.4387	51.7017	51.4965	51.6337	52.6999	52.0865	52.0913	52.2932	52.1081	51.7452	52.6006	52.4377	52.3487	55.0816	55.3555	55.7355	56.8576	58.3277	59.675	61.146	62.8006	63.8404	66.6393	68.4058	70.6234	74.3914	76.3827	78.4297	81.5443	84.058	86.7205	89.9694	92.9488	96.0203	98.119	101.7	104.548
	54.5656	54.6115	55.6339	55.2796	55.183	55.0521	55.1569	55.1448	55.4599	55.282	55.8609	56.4171	55.9722	56.4069	56.143	56.5782	57.4467	56.9394	56.9116	57.2562	57.3106	56.7449	57.7475	58.0346	57.2412	59.8635	60.0841	60.424	61.3884	62.8788	63.982	65.9054	66.6488	68.0491	69.907	71.8367	73.9393	77.3464	79.1831	81.141	84.481	86.6524	89.6785	92.4778	95.7653	98.3678	101.065	103.914	105.874
	51.0893	51.1662	51.4405	51.1811	51.6883	51.5282	51.8104	51.9191	52.0092	51.7476	52.3705	51.9821	52.114	52.3388	52.1849	52.4856	53.1987	52.5841	52.5755	52.4479	52.5028	52.336	52.7679	52.978	52.752	55.9812	55.8889	56.3005	57.0107	57.9128	58.8152	60.049	60.4278	61.5002	63.0077	64.4697	65.7898	68.3079	69.1235	70.5438	72.426	74.1327	76.0468	78.058	80.1089	82.5008	84.3278	86.5327	88.6066
	52.4461	52.2002	52.4502	52.5565	52.9854	53.1984	53.7734	53.7857	54.0223	54.6944	54.9323	55.1464	55.5799	55.396	55.1886	55.6807	56.6653	55.9861	55.7182	55.8825	56.1448	55.5733	56.3763	56.3612	56.3293	58.221	57.9136	58.2708	58.8385	60.5753	61.8685	63.6728	64.5496	65.2919	67.5428	69.4208	71.5253	73.9882	75.8779	77.4371	80.1043	82.038	84.7281	87.1589	90.052	92.5445	94.499	97.3308	99.3048
	21.7696	22.0654	22.3824	22.3932	22.3134	22.4584	22.6616	22.9778	23.409	23.5142	23.8571	24.2151	24.4386	24.4074	24.3864	24.7983	25.553	25.309	25.4957	25.6852	25.9536	25.899	26.2172	26.4924	26.3524	28.8117	28.7265	28.8832	29.6045	30.6122	30.9718	31.8155	32.2311	32.1361	33.2692	34.4514	34.9554	36.6296	36.8934	37.7895	38.6545	39.3017	40.3098	41.6175	43.1976	43.9543	44.9329	46.3518	47.4463
	22.0937	22.0611	22.4645	22.6155	22.9643	22.9287	23.2211	23.1591	23.5386	23.7201	24.1498	24.0366	24.3446	24.4882	24.1736	24.5502	25.5069	24.9684	25.1763	24.9521	25.4217	25.2609	25.7182	25.9584	25.7058	27.9841	27.6668	27.9005	28.3506	29.1783	29.4539	30.0614	30.1919	30.4209	31.0683	31.937	32.4663	34.0245	34.2206	34.5674	35.5755	36.0751	37.2138	38.1857	39.807	40.4211	41.5125	42.6995	44.1146
	29.5121	29.8306	30.0991	30.2673	30.4999	30.3598	30.9721	31.2557	31.6799	31.8189	32.0706	32.3459	32.5499	33.1868	33.0432	33.4575	34.2047	33.9519	34.3786	34.577	34.8935	34.8073	35.2016	35.7801	35.7504	39.4476	39.2471	39.4702	40.1714	40.7817	41.0048	42.078	41.9069	42.2449	42.9514	44.1119	44.1663	45.6009	46.0685	46.703	47.2057	47.9485	49.0037	50.0212	50.9521	52.1261	52.7581	53.5747	54.8446
	48.5393	49.2692	51.1328	50.3813	51.463	51.3605	52.5851	52.7515	53.4665	54.1004	55.1282	55.6909	56.0851	56.1111	56.8333	57.6898	59.7848	58.9005	59.8476	59.4944	60.7368	60.2663	62.0775	62.0866	62.8314	60.1233	60.0417	60.5998	61.8116	63.3567	63.9844	65.1781	65.3251	65.9052	68.0813	69.7951	70.0875	73.2422	74.1286	74.6847	76.4868	77.8115	79.4802	81.3284	83.355	85.7614	86.4001	88.3001	90.0681
	51.7899	51.1817	50.244	49.2572	49.4419	49.2115	49.1273	49.5888	51.0149	51.4295	52.2047	52.6951	52.8898	53.126	52.9524	52.0763	51.8435	51.0309	50.882	50.7489	50.9742	51.5454	51.9354	51.522	52.3512	51.8385	52.2732	53.7075	54.4554	55.17	56.3614	57.6404	59.3083	60.4634	61.8206	63.5549	65.2773	66.1778	67.8781	68.9258	69.2866	70.5467	71.0012	72.0578	72.739	73.3052	74.2974	74.7805	75.7278
	28.2935	27.8496	27.3875	26.5944	26.6688	26.5454	27.0664	27.497	28.0578	28.7266	29.6608	29.9568	30.7231	30.5425	29.9701	29.4877	29.0721	28.6357	28.6669	28.431	28.3951	28.965	28.6416	29.4108	29.9208	28.904	29.7968	30.8859	30.5851	31.7554	32.4494	33.5997	35.0484	36.8041	38.0956	39.9696	42.0946	43.5739	45.6006	46.5983	47.2272	48.244	49.2881	50.7408	51.7195	52.7525	53.1354	54.0598	54.5944
	31.1655	31.1222	30.2552	29.658	29.645	29.8857	30.2665	30.6358	31.7914	32.5232	33.0249	33.6584	33.9182	34.4447	34.3022	33.4204	33.5338	32.8347	32.3338	31.8955	32.7457	33.4294	33.2644	33.5292	33.5339	32.8509	33.4837	34.3399	34.8832	35.9206	37.7315	38.901	40.724	42.6964	44.819	46.7392	49.4998	51.1332	53.1948	54.3951	56.0807	57.8121	58.783	60.0903	61.5863	62.8075	63.3051	64.3976	66.3419
	32.5814	32.2785	31.305	31.0223	31.1281	31.2236	31.1842	31.5598	33.1827	33.4472	34.4413	35.0416	35.1514	35.5818	34.8588	34.3749	34.2355	34.0854	33.6068	33.0469	33.5289	34.1126	34.1379	34.337	34.9879	34.4784	34.9708	35.6914	35.8529	36.57	37.0092	38.5837	39.5398	41.138	42.1085	44.4564	46.6165	48.0018	50.2534	51.473	52.1922	53.8914	54.7784	56.515	57.9741	59.0758	60.0215	61.3453	62.7227
	22.8034	22.3203	21.9793	21.1463	21.7543	21.9046	22.1285	22.2931	23.7187	24.264	25.0822	25.9687	26.2756	26.1857	26.3794	25.8631	25.8249	25.6838	25.3159	25.2442	25.3355	26.2721	26.5343	27.2026	27.9025	30.1914	30.2922	30.9817	31.3411	31.9074	32.45	33.6655	34.706	35.9402	37.2634	38.6152	40.5318	41.8889	43.9201	44.8662	46.2827	47.6043	48.4939	50.0439	51.689	52.384	53.7211	55.2189	56.23
	32.6521	32.4585	31.8659	31.1568	31.533	31.5848	31.4066	32.2895	34.0514	34.3614	35.4951	36.0753	36.3594	36.4449	36.1454	35.011	35.4209	34.6296	34.5444	34.6411	34.3529	35.0718	35.071	35.5563	36.2055	36.5701	36.6327	38.2306	38.0745	38.919	39.2192	39.7186	40.496	41.7285	43.3065	44.9624	46.9929	47.7673	49.825	51.6054	52.4796	54.2706	55.2751	57.3526	58.7441	60.1104	61.3603	62.7782	63.956
	17.7648	17.4348	17.1119	16.2412	16.2846	16.4862	16.6519	16.9351	18.2309	18.8796	19.5286	20.256	20.3932	20.6138	20.7925	20.517	20.3121	19.7126	19.4218	19.4437	19.6839	20.0763	20.2238	20.2837	21.2547	22.183	23.2173	24.8099	24.8095	25.7959	26.489	27.6911	28.6826	30.3039	31.7699	33.1124	34.8763	36.1975	38.174	39.1439	39.532	41.1508	41.5538	43.0077	43.8557	44.5983	45.6248	46.4044	47.8669
	39.789	39.6675	39.3469	38.3373	38.8258	38.8278	38.7281	39.284	40.9935	41.2909	42.5086	43.2056	43.4312	43.6232	43.8844	43.102	43.2276	42.9878	42.6168	42.3692	42.818	43.0623	43.1886	44.1627	44.8379	49.4774	48.1855	50.0465	50.5967	51.2747	52.6649	54.3269	55.7881	57.3867	59.0211	60.2673	63.3588	63.7829	66.5087	67.0525	68.1136	69.2381	69.7968	70.968	71.7861	71.9824	72.8511	73.6359	74.7596
	35.6043	35.2957	34.9251	34.4266	34.9056	35.152	35.2709	35.4961	36.3908	37.0165	37.6399	38.0216	38.3503	38.6288	38.4345	37.8398	37.9624	37.8032	37.6087	38.0105	38.1706	38.7858	39.2962	39.4875	40.4063	47.5699	45.6287	46.2384	46.2554	46.8385	46.9226	47.4232	48.4136	49.0511	49.7529	50.6333	51.7797	52.7928	53.8117	54.3999	54.7702	55.2824	55.4369	56.2121	56.8828	57.8636	58.0192	58.8257	59.2774
	19.7107	19.5903	19.4918	18.832	19.0345	19.0321	19.1267	19.3993	20.4448	20.7197	21.3868	21.7039	21.8481	21.886	21.7318	21.2223	21.5212	21.1955	21.2025	21.4476	21.704	22.2538	22.4631	22.5084	23.097	24.5704	23.7897	24.1469	23.8389	23.9963	24.0762	24.386	24.9452	25.2503	25.5811	26.262	27.2472	27.6355	28.6935	28.9387	28.9354	29.6203	29.853	30.7481	31.2902	31.9212	32.2811	32.7012	33.283
	14.2101	14.0248	13.6474	12.8863	13.201	13.2032	13.2408	13.6103	14.8053	15.255	16.132	16.3388	16.5084	16.831	16.7173	16.1077	15.8449	15.6055	15.4174	15.395	15.58	16.2327	16.3539	16.7808	17.5919	17.5837	17.5885	18.3504	18.3586	19.0423	19.1538	20.3932	21.0401	22.7288	23.4862	24.9668	27.0111	28.2629	29.7693	30.6178	31.1922	32.4009	33.1053	34.5328	35.5178	35.892	37.3368	38.2157	38.724
	9.37929	9.27516	8.59854	7.46671	8.40201	8.16535	7.94149	8.15605	9.32337	9.80985	10.5757	10.6734	11.2729	10.7846	10.4111	10.203	9.863	9.03205	9.19274	8.83017	9.09236	9.30916	9.27487	9.50521	10.0112	8.69845	8.98026	9.41855	9.0936	9.51279	9.72908	10.3158	11.2062	12.2909	13.3044	14.4725	15.783	16.8864	18.4855	18.794	19.0832	20.24	20.7627	21.837	22.7718	23.4538	24.0036	25.0734	25.8079
	1.2996	1.01482	0.539362	0.0640903	0.374666	0.316644	0.635703	0.914228	2.00318	2.66061	3.33259	3.71604	4.00501	4.18854	4.12223	4.27008	4.00666	3.96706	3.73253	3.98166	4.21796	4.74402	5.3399	5.33043	6.12681	6.42262	6.44017	6.99684	7.48026	7.92109	8.47395	9.36636	10.4796	11.7447	12.2706	13.8385	15.3238	15.6729	17.4484	18.3377	18.5306	19.8627	20.2409	21.0672	21.8532	22.8478	23.5191	24.299	25.0335
	37.7129	36.8614	36.4398	36.1295	36.7375	36.8213	37.4937	38.0617	39.8157	40.55	41.2643	42.43	42.6058	42.4391	42.2238	41.8082	41.6885	41.5293	41.0402	40.7761	41.2825	41.6554	41.562	41.516	42.2899	43.3866	43.709	45.5269	46.141	47.6824	48.8899	49.9298	52.271	53.4239	55.0182	56.3615	58.1858	59.2911	60.3538	62.0239	62.2913	64.084	64.4851	65.2878	66.642	67.7185	67.9058	68.2471	70.1939
	55.5196	55.1683	54.0456	53.4056	53.9738	53.7375	53.6367	54.3595	55.8553	56.6312	57.5897	58.1801	58.2147	58.0394	57.814	57.1276	56.9012	56.0159	55.302	55.3954	55.4462	55.8603	55.7457	55.5249	56.384	57.4721	57.2029	58.1035	58.4727	58.8876	59.6147	60.6533	62.2685	63.7076	64.8	66.0538	67.9455	68.522	70.1438	70.6707	71.029	71.4834	71.9519	72.4737	73.0997	73.8242	74.4465	75.1727	75.6385
	32.3647	32.1439	31.6357	30.5132	31.0103	30.5698	30.6445	31.0789	32.3827	32.9199	33.6675	34.0804	34.7746	34.7281	34.3368	34.0413	33.9294	33.2094	32.7914	32.716	32.7238	33.2068	33.3339	33.7174	34.3941	40.8297	41.0656	41.375	41.8222	42.2078	42.5613	43.3642	44.6417	45.7088	46.5041	48.3054	50.4056	51.5365	53.8547	54.3858	55.2721	56.7766	57.4995	59.1476	59.7685	61.2652	62.814	63.7012	65.3871
	17.6618	17.7676	17.2562	16.9106	17.2251	17.4102	17.0567	17.5553	18.6622	19.1958	19.7208	19.9808	20.3712	20.4418	20.1474	19.7283	20.2056	19.7586	19.8773	20.1441	20.5653	21.3897	21.3294	21.7581	22.4064	22.2792	22.1039	22.0559	22.1834	22.3973	22.7701	23.2835	23.8899	24.4583	24.8569	26.0957	27.4938	28.2931	29.5788	29.9795	30.0354	31.0746	31.6235	32.5937	33.6393	34.12	34.6	35.4992	36.4062
	21.5158	21.5298	21.5017	20.2948	20.0074	19.3386	19.0205	18.5058	18.8965	18.639	18.4671	19.0237	19.1929	18.9819	19.9558	19.7613	20.8369	20.6473	20.4711	21.2289	20.8527	21.213	21.0075	21.4684	20.9059	23.9899	24.5498	24.8369	26.7097	27.7017	28.6262	30.2881	32.5162	34.0672	36.1694	38.7724	40.6537	43.488	46.1204	48.591	51.5502	54.4672	56.818	59.0019	61.8583	64.2824	66.9857	68.9308	71.2847
	31.9365	32.3108	32.3637	30.9847	31.1191	30.2011	29.8825	29.3235	29.4077	29.0069	29.4617	29.3	29.715	30.0789	30.2909	30.8004	31.4308	31.2031	31.1789	31.5036	31.9074	31.9261	32.2303	31.455	32.2267	33.0035	33.0617	34.2535	35.8232	37.3493	37.8589	39.1022	41.3901	43.3911	46.0827	48.4308	50.8195	53.6822	57.204	60.1744	63.7288	67.2455	70.6281	73.2127	76.6013	79.0147	82.773	85.4482	88.9256
	44.8257	44.9287	44.0107	43.2894	43.0477	42.1929	41.2538	40.8243	41.1117	40.2987	40.5407	41.0441	41.4019	41.2787	42.168	42.554	43.0938	43.0545	42.7286	42.8763	43.3464	43.4017	43.5014	43.1555	43.3491	42.234	43.318	43.6652	45.26	47.1141	48.2728	49.5548	51.6957	54.9606	57.557	61.4799	64.4755	68.1052	72.4031	76.528	80.504	84.082	88.1532	91.759	95.702	99.3037	102.67	106.528	110.184
	35.5246	35.9637	35.3785	34.2929	34.1356	33.6735	32.8969	32.6918	32.4155	32.8623	32.3624	32.8108	33.2348	33.2381	33.8563	34.3656	34.3105	34.2397	34.0658	34.438	35.2906	35.0865	35.1485	35.8776	35.2031	37.2896	37.88	39.1109	40.5317	41.6307	43.0139	44.3412	46.8439	48.83	51.0009	54.2002	56.6099	59.3492	63.5592	65.7919	69.5328	72.4215	75.7993	78.8664	81.9492	85.0891	88.1481	91.5129	94.3871
	40.4173	40.5951	40.282	39.2669	39.2299	37.8605	37.8874	37.7091	38.4166	37.1324	37.4376	37.4088	38.3781	38.3281	38.5232	39.1572	39.3868	39.7457	40.1693	40.5611	40.7585	40.4858	41.2374	40.8317	41.1981	43.9109	44.1233	46.0122	47.3106	49.2417	50.8604	53.0612	55.6862	58.8193	61.9279	65.0845	68.1025	71.8585	76.0117	79.7235	84.181	87.4827	91.6603	94.7623	97.9301	101.25	104.989	107.654	111.697
	28.1598	28.06	28.4864	27.2138	26.854	26.0856	25.2763	25.1126	25.2511	24.9297	24.8151	25.1697	25.5647	25.938	26.0324	27.0377	26.921	27.3376	27.5317	27.2562	27.9198	28.1097	28.2037	27.8037	27.981	28.4846	28.677	29.367	29.9268	30.7511	31.7515	32.9151	34.5962	36.5648	38.4872	40.9045	43.2526	45.6349	49.6084	51.866	55.1331	58.955	62.2169	64.9331	69.0114	72.7943	75.9651	79.8704	83.7012
	39.9586	39.7278	39.4605	38.7573	37.9323	37.0667	36.2494	35.9184	36.1588	35.6536	35.8682	35.8715	35.6954	36.3307	36.9166	37.3147	37.554	37.6199	37.529	37.8273	38.3018	38.6028	38.6347	38.1684	38.5	37.0281	37.2532	37.7567	38.9805	40.165	40.3474	41.7467	42.9361	44.9661	46.893	49.2583	51.6554	53.7794	57.137	60.6992	63.6781	67.3	70.1585	72.8514	77.3034	80.5667	83.8268	87.6616	91.1264
	23.9585	24.2146	24.1759	23.7652	23.0828	22.3072	21.8796	21.8321	21.6745	21.2983	21.734	21.797	22.2035	22.3869	22.5376	23.0938	23.2439	23.4828	23.5292	23.708	23.8132	24.0505	24.2929	24.2653	24.853	24.8181	25.1343	25.9569	27.3288	28.6503	29.4333	30.5196	32.4218	34.9147	36.6479	39.3754	41.8402	44.7689	47.5679	50.8387	53.7131	57.4766	60.9775	63.8773	67.5662	70.4331	74.0375	77.4463	80.8865
	35.2261	35.7611	35.2474	34.3058	33.6046	33.0384	32.6216	32.2616	32.3913	31.9104	32.1694	32.3155	32.6348	32.4821	33.1111	33.5705	33.9204	33.6864	33.8537	34.1813	34.0604	34.1382	34.3634	34.8272	35.2144	34.2265	34.1614	35.3387	36.3319	37.7001	37.9618	38.9526	41.0794	43.0526	44.8344	47.3728	49.3285	52.4369	55.6503	58.3	61.183	64.1964	68.1344	70.4458	73.7814	76.7093	79.9252	83.0133	86.4317
	40.2106	40.003	39.6613	38.7734	38.6867	37.8986	37.3006	36.3702	36.0877	36.3488	36.2166	36.4716	37.1672	36.9307	37.4677	37.8495	38.4117	38.4514	38.069	38.4678	38.5499	39.3702	38.9796	39.0574	39.247	38.4682	39.5211	39.5967	40.776	42.0749	42.513	44.1741	46.0304	48.5513	51.0174	53.188	55.9951	59.2793	62.378	65.2172	68.4314	71.6816	74.4975	76.9262	80.4219	83.3811	85.8251	89.3795	91.7967
	40.5069	40.8222	40.7712	39.5217	39.1339	38.2778	37.643	37.8553	38.1399	37.4847	38.0215	37.9109	38.041	38.0129	38.9074	39.5127	40.2437	40.3957	39.9185	41.2281	41.9423	41.6846	41.9314	42.021	42.4078	44.0494	44.6569	47.5095	49.7592	51.6044	52.917	54.7602	57.3889	60.2247	62.6323	65.3101	68.0751	71.1287	74.5945	77.5076	81.0728	83.9803	87.3668	89.5937	93.4741	96.2457	99.323	101.954	104.02
	34.0802	34.6862	34.1509	33.4442	32.9096	31.9717	31.5741	31.2333	31.3993	30.5154	30.9866	31.1634	31.4929	31.7473	32.1048	32.7027	33.3916	33.0348	33.2375	33.4175	33.4789	34.0593	33.9027	33.7361	33.7454	34.3231	35.0901	36.7467	38.5827	40.5486	42.0762	44.4484	47.0641	50.2206	53.0552	55.6745	58.4245	62.218	65.325	69.1192	72.5322	76.7828	80.5549	84.1422	87.6847	90.4727	92.4957	95.3262	98.5527
	31.6915	32.0325	31.7364	30.728	30.4084	29.3892	29.0567	28.1851	28.504	28.1137	27.8578	28.3748	28.4598	28.8839	29.2493	29.7277	29.8823	30.0973	30.2004	30.3254	30.5487	30.7277	31.1	30.6486	30.5187	30.5683	31.2865	32.3553	33.7318	35.2459	36.698	38.4571	41.0734	43.6758	46.2679	49.437	52.0981	55.3947	59.1792	63.1931	66.8742	70.6325	74.6507	77.748	81.6753	85.5929	89.4037	92.4875	95.7382
	27.9688	28.2314	28.0507	26.8461	26.597	25.7452	25.3687	25.0825	25.2195	24.7021	25.1298	25.2411	25.492	26.0044	26.8128	26.9957	27.4775	27.7278	27.5819	28.1411	28.3975	28.5919	28.9977	28.771	28.8204	29.9959	30.1029	31.2165	32.8531	34.5125	35.3305	37.0528	39.0936	41.4566	43.9068	46.8235	49.4792	52.7496	56.133	59.879	63.9992	67.962	72.1007	75.8806	80.1659	84.0938	87.804	90.9389	94.2986
	38.2865	38.5254	38.0207	37.1507	36.777	36.1441	35.8027	35.5179	35.5543	34.6493	35.447	35.1735	35.8786	36.0269	36.4175	37.5876	37.57	37.814	37.8403	37.9807	38.5644	38.7997	39.1243	39.5426	39.348	39.6048	39.8942	41.2291	42.5488	43.8802	44.284	45.9051	48.1589	50.3618	52.6193	55.6907	58.6016	61.7127	66.2041	69.237	73.693	77.744	81.4763	85.0382	89.6381	92.973	97.3696	101.42	104.78
	39.1226	39.5734	39.0257	38.3939	38.0519	37.4975	36.7457	36.6597	36.8909	35.8533	36.1593	35.8579	37.1762	37.0458	37.6016	38.9976	38.8668	38.8454	39.4258	38.9247	40.0495	40.0181	39.969	40.9665	40.8737	40.4309	40.9866	42.3723	42.606	44.7248	45.7874	47.7688	48.9994	51.2887	53.5013	55.9015	59.56	62.5031	66.4176	70.2507	73.8095	78.192	82.3813	84.3821	90.024	94.8884	99.1446	103.919	107.74
	26.2036	26.429	26.2938	25.4103	24.8739	23.8531	23.6433	23.0282	22.7933	22.5687	22.8286	23.0172	23.1509	23.5153	23.7344	24.6578	25.2742	24.8986	25.1582	25.1602	25.2539	25.7539	25.8619	25.845	26.0212	25.5572	26.3482	27.412	28.6372	30.39	31.4354	33.2914	34.723	37.1025	39.0575	40.8522	43.3251	45.9482	48.3043	50.8974	53.8143	56.1511	58.5448	60.8929	63.2292	65.4749	67.9541	69.5701	72.1082
	25.7388	27.0658	26.5164	25.9813	24.7465	23.9521	23.5496	22.4263	22.2769	22.5575	22.0504	23.0974	22.9848	23.3594	23.4436	24.3932	24.314	23.6094	22.8909	24.0825	24.3734	24.5095	23.3865	23.7605	23.9957	21.9333	21.9593	22.6129	22.8713	23.8505	24.6881	25.9782	26.0272	27.1836	28.6167	30.4298	31.2427	33.906	35.9564	37.0129	38.2189	40.2162	41.7325	44.1343	45.4613	46.3591	48.2551	48.9853	52.3247
	28.9515	28.4475	29.7977	28.993	29.519	29.3726	28.7675	27.8018	28.6902	28.4922	28.3274	29.2673	28.9421	29.7885	29.9562	29.7625	29.3964	29.1277	29.4826	30.5038	29.961	30.4822	30.6376	31.0653	31.5435	28.4813	28.3157	34.6274	35.4155	37.6862	36.0571	37.7767	39.2149	40.7163	41.5708	43.261	45.6136	46.9398	48.7889	51.8546	54.2773	56.6485	58.6089	60.0937	62.4786	63.9951	65.5728	67.8977	69.4406
	57.2425	57.0039	57.7687	57.5923	58.0534	57.7265	57.9664	55.2469	57.8534	58.0477	58.5944	58.7584	58.9395	59.9259	59.9714	59.2818	59.0606	59.7378	59.8737	59.7703	60.2095	60.9729	60.9863	61.5406	61.8119	60.1461	60.9645	62.1179	63.3777	67.7229	66.6064	68.8364	71.4	74.4212	76.3719	79.0186	81.748	85.0552	88.833	93.0385	95.9307	101.732	104.404	107.722	112.065	114.681	117.79	121.157	124.669
	36.7323	36.6377	37.0656	36.9305	36.938	37.0887	36.9419	36.7807	36.7129	36.8201	36.5024	37.1372	37.4562	37.7213	37.7154	37.1148	37.5985	37.4143	37.8667	38.2743	38.1654	38.4402	38.4302	39.2604	39.6552	37.4479	37.4319	37.5503	39.0353	42.2225	41.4015	43.2139	45.7095	48.0657	49.9345	52.6507	55.6216	58.0079	61.4982	64.7894	68.7717	72.6814	76.366	78.8382	82.8938	85.8124	88.4969	92.0614	94.5934
	45.5192	44.874	45.3391	45.0586	45.015	44.973	44.7993	43.4913	43.3997	43.0634	42.8485	42.961	43.6059	43.6021	43.2273	42.9211	42.504	42.7108	43.2483	43.6537	43.3307	43.9335	43.7243	44.9569	44.8701	42.4003	43.505	50.8845	52.0928	55.5741	55.568	58.0121	60.3939	62.7574	64.8573	67.7047	70.6301	73.9506	76.5143	80.2381	83.9674	88.1972	91.6589	94.5173	97.2295	100.301	103.134	105.746	107.676
	32.7681	32.239	32.2665	31.9372	32.2025	31.9054	31.3159	32.0536	30.9313	31.0382	31.1093	30.9972	31.3756	31.9784	31.0717	30.7839	31.0509	31.1384	31.4346	31.5067	31.5444	31.7072	31.9567	32.7998	32.3869	31.0912	31.8736	30.8985	32.2421	35.7217	35.6663	37.2955	39.6877	42.3889	44.2894	46.4223	49.4113	51.9295	54.681	58.1431	61.4423	64.4524	67.2611	70.7548	73.3553	75.3272	78.164	80.297	83.2566
	54.4732	54.2865	54.8132	54.52	54.655	54.8382	54.7402	54.9656	54.41	54.0894	54.9852	54.7862	55.384	55.5557	55.8933	55.3464	55.2508	55.6244	56.1216	56.536	56.1297	56.9235	56.4141	57.5486	57.7894	57.0444	57.5368	52.0485	54.2467	58.1807	58.5377	61.0504	64.829	67.846	70.6472	73.7008	77.8716	81.5511	85.3654	90.6056	94.9524	100.568	105.066	108.407	112.408	115.404	119.495	122.864	125.762
	59.1706	58.2423	59.2139	58.5124	59.0218	58.9461	58.9793	58.201	59.476	58.92	59.2188	59.3269	60.6401	60.9722	60.6183	60.119	59.4706	59.95	60.2947	60.8144	60.415	61.1307	60.9794	61.7541	62.2895	59.6527	61.2031	60.6254	62.6625	66.93	67.0563	69.5276	73.3664	76.8142	79.776	83.0482	86.5888	90.5162	94.8918	99.5498	104.568	110.659	114.318	118.753	122.615	125.701	129.622	133.296	136.911
	55.5124	54.9523	55.8488	55.7595	55.6595	56.1141	55.9176	53.4142	55.8516	55.814	56.5401	56.569	57.0848	57.4315	57.5172	56.8908	56.8341	56.8948	57.5191	57.9276	57.5971	58.195	58.3674	59.7821	59.749	59.2051	60.1852	65.7982	67.7381	72.0906	71.341	73.8218	76.2358	78.9492	80.5058	83.8449	86.6374	89.3467	91.7897	96.0065	99.2702	103.643	106.14	108.764	111.96	113.661	116.767	119.816	121.963
	34.2985	34.2289	34.4524	34.1941	34.3588	34.2571	34.2819	33.7559	33.9449	33.7829	33.7941	34.3207	34.6502	34.7867	34.806	34.3566	34.2288	34.6566	34.6722	34.9638	34.8872	35.5973	35.573	36.2937	36.212	35.6469	36.5654	39.8207	41.7755	45.4429	44.9792	46.9606	49.4516	51.4421	53.2498	55.4908	58.0567	60.4234	63.0398	66.4715	69.0815	72.6778	74.9826	77.8584	80.02	82.2015	84.3943	87.057	88.938
	31.7307	31.305	31.7526	31.781	31.4916	31.7883	31.8352	31.6526	31.6625	31.558	31.5858	31.8428	32.3556	32.6601	32.5486	31.8958	31.8625	32.2945	32.5274	32.7986	32.8322	33.2086	33.2787	34.1052	34.2677	33.1068	34.278	34.5481	36.1368	39.8304	39.3045	41.4023	43.3332	45.5579	47.345	49.1894	51.7267	54.2007	56.4101	59.4499	62.5741	65.9431	67.9149	70.1933	72.8187	74.8204	76.9373	79.2174	81.4921
	38.0193	38.1903	36.5264	36.9461	37.0365	35.8342	36.0901	34.5578	35.0796	35.2395	35.6057	35.4818	35.9865	36.4859	37.9003	36.8819	37.8732	38.0427	37.7954	38.1656	38.8949	39.0328	39.8346	39.7217	40.0729	38.7689	41.7938	43.2995	45.3547	50.526	54.196	56.4845	62.1595	66.6984	70.1363	73.6711	76.9801	80.0919	83.9146	88.1036	90.5381	94.298	97.0056	100.386	104.943	110.678	113.802	117.419	122.348
	45.2107	45.5009	45.824	44.8013	44.8675	43.835	44.0588	43.1371	43.1702	43.4089	43.3284	43.5791	43.923	44.6797	45.5075	45.3303	46.2522	46.0968	46.4768	47.0047	46.7706	46.9142	47.3369	47.922	48.5592	46.8304	49.0938	51.9467	54.0774	58.1843	61.1944	63.2528	68.743	73.0693	77.1888	81.9429	85.6822	90.2705	94.8105	98.8732	102.663	107.091	109.832	114.565	118.09	123.264	127.195	131.011	135.089
	45.5134	46.1202	44.8982	44.5499	44.8117	43.7747	43.4726	42.6714	42.7138	43.2576	42.6976	43.662	43.6287	44.1118	44.4146	44.2003	44.8668	45.124	45.5871	45.9483	45.9205	45.8101	46.1548	46.8932	46.8699	45.7042	47.9497	49.4803	50.8953	55.1248	58.4372	59.9773	64.68	69.3821	73.021	77.2162	80.9624	85.6121	90.0837	94.5686	97.3726	102.837	106.064	110.337	115.168	120.462	125.464	129.327	134.525
	46.5528	47.1783	46.8699	46.3975	46.3295	45.3911	44.56	43.7332	43.6682	44.4685	44.1411	44.1746	44.4704	45.0987	45.6809	45.4004	46.4028	46.3556	46.2384	47.5361	47.4154	47.5007	48.296	47.9546	48.1934	46.6319	48.2263	49.4015	50.9411	53.7857	56.8659	57.1324	61.401	64.7242	67.4409	70.1512	72.7131	75.6403	78.0798	81.3909	82.9678	85.8428	87.4618	90.5944	93.6167	97.0424	99.5285	101.885	105.529
	22.1768	22.9839	21.3904	21.6973	21.4633	20.7852	20.4364	20.1003	20.2801	20.6121	20.7361	20.928	20.5647	21.4822	22.3486	21.687	22.2357	22.7084	23.0363	23.4247	23.5207	23.3306	23.6264	24.1889	24.3304	24.2535	25.6563	26.8917	27.5762	30.5305	31.9405	32.5018	35.6931	37.524	39.0357	40.6316	41.9791	43.3272	44.5778	45.6518	46.5079	47.7096	48.6251	49.9463	51.6651	53.6047	55.589	57.121	58.4947
	51.0965	51.7805	52.7663	51.0271	50.4623	49.7738	49.1395	48.3783	48.4046	48.841	48.4557	48.5202	48.9131	49.459	50.1989	49.4097	50.7914	50.8108	50.9655	51.3797	52.0108	51.9797	52.1935	53.1246	52.5159	50.8829	52.8292	54.1387	55.4214	58.7551	61.2345	62.1399	65.6389	68.0307	70.7952	73.1067	75.0622	77.7896	80.928	82.8403	83.2721	84.843	86.291	88.3502	90.5989	93.6089	95.2127	97.4512	100.429
	31.6784	31.8153	30.242	30.8696	30.7483	30.0284	29.0921	28.7778	29.2242	29.1339	29.3423	29.7834	29.5916	30.0963	31.1293	30.7504	31.3594	31.6997	31.9554	32.4137	31.8455	32.6707	33.898	33.1233	33.6405	33.0664	35.0538	36.4098	37.3613	40.2695	42.6036	42.8354	46.0534	49.7754	50.2284	52.6876	54.0273	55.9128	57.4559	59.5899	60.8246	61.8432	62.7325	64.1263	67.2117	68.026	70.6533	73.0188	75.1388
	34.1891	34.7647	32.705	32.842	33.0307	31.7997	31.1954	31.3896	30.8231	31.7694	30.6182	31.4935	31.395	31.7588	32.0095	31.9169	32.5499	32.8785	32.6793	33.1176	33.9356	33.8374	34.1036	33.9613	34.194	33.725	35.129	37.4506	38.3677	40.8994	42.4293	43.2275	46.9713	49.3346	50.7325	53.2969	53.8538	55.7245	57.8342	59.9614	60.0992	62.2971	62.8858	64.3098	66.6102	68.317	71.0134	72.4533	74.6955
	34.9395	35.2419	34.0105	34.3105	33.8133	32.9112	32.3168	31.7661	32.1625	32.048	32.2957	32.827	31.7595	32.8917	33.5429	33.1354	34.4169	34.2245	34.2924	35.3419	35.3628	35.703	35.8264	36.1661	36.1873	34.3329	36.2625	38.1055	39.9216	43.1925	46.0244	47.4192	51.654	54.7913	57.9936	60.7547	62.8071	65.9705	68.4241	71.0595	73.1925	76.0657	78.0504	81.4192	84.1317	87.8392	90.4472	93.3013	96.5442
	34.761	35.5175	35.0994	34.7265	34.4452	33.4661	32.8846	32.4335	32.1299	32.4211	32.4319	32.5822	32.5641	33.4737	33.9845	33.4136	34.3481	34.4863	34.5271	35.5478	35.3716	35.9809	36.0981	36.4638	36.2579	35.7395	37.06	39.1309	40.118	43.0675	45.7019	46.5608	51.1129	54.0802	56.7111	59.9454	62.7967	65.6079	69.2148	72.0455	75.4547	78.5953	80.6811	84.817	88.7355	93.439	96.5625	101.343	104.79
	34.0093	34.1647	31.6393	31.8811	31.7625	30.813	30.0733	29.5038	30.2244	30.2745	29.873	30.2954	30.3859	31.0917	31.5855	31.3458	32.2646	32.3174	32.6947	32.9624	33.0127	33.1772	32.9929	33.1129	33.0743	30.2266	31.5004	31.3736	32.1612	34.0946	35.4657	35.9374	38.516	40.4474	42.1061	44.1284	45.7748	47.2526	48.9756	51.0758	51.8636	54.0098	55.5761	57.0639	60.0331	62.4897	64.7815	66.838	69.3986
	39.2298	39.5621	38.6352	38.1235	37.7637	37.0423	36.5653	36.0675	36.1997	36.7155	36.5299	36.8918	36.8178	37.5672	38.1871	37.9878	38.9441	38.9852	38.8041	39.5968	39.5101	39.916	39.9185	40.1498	40.7019	40.2437	42.2667	43.8168	46.1085	50.2515	52.6987	54.2971	60.351	62.8624	66.0951	70.0986	72.9436	76.181	79.8637	82.6889	84.6354	88.2955	90.3827	94.4773	97.589	101.485	105.147	107.819	110.811
	35.6177	36.3185	34.765	35.0774	34.6528	33.4824	33.1965	32.4259	32.809	32.9991	32.8498	33.2015	32.9813	33.7918	33.8896	33.5929	34.4578	34.8271	34.663	35.1594	35.0297	35.8738	35.819	36.0694	36.316	36.2407	38.3385	40.16	41.9002	46.4462	49.0524	51.4536	57.2914	60.6356	64.6037	68.4467	71.8246	75.6527	79.5234	82.7884	85.2105	89.5884	92.1157	96.4051	99.7203	104.143	106.802	110.79	114.428
	39.78	40.3606	38.5231	38.8816	38.7361	37.7381	37.2786	36.6433	36.5779	37.1131	37.0529	37.0179	36.6863	37.8079	38.5576	37.9851	38.7445	38.7419	39.1603	39.5787	39.3741	39.3077	40.208	40.2273	39.8915	38.5028	40.7784	41.9718	43.3909	47	48.9938	50.1393	55.0029	58.5266	61.1071	64.7898	67.622	70.1575	74.3775	77.057	79.1981	82.2792	84.4548	88.3002	91.5918	94.5019	97.1347	100.443	103.216
	38.8743	39.6691	38.587	38.7365	38.6864	37.7994	37.3338	36.8592	37.2091	37.3702	36.97	37.596	36.9264	37.2204	38.0553	37.7287	38.7649	38.8065	38.455	39.2893	39.3975	39.3972	40.1114	39.8875	39.9897	38.2828	39.289	40.2324	40.3215	43.5377	45.1445	45.7536	49.5702	51.7886	53.4893	56.1658	57.7694	59.8308	62.8356	64.5339	65.9457	68.7732	70.0785	72.1538	76.0046	78.47	80.4402	83.4922	86.6954
	48.6484	49.5246	49.8458	48.9623	48.6508	47.8644	47.2696	46.4856	47.198	47.4559	47.3016	47.3712	46.732	48.3379	48.6815	48.5307	49.9704	49.4282	49.898	50.2421	50.4506	50.9365	50.9847	51.5103	51.544	50.022	51.7333	52.6181	53.6561	56.7338	57.9511	58.4955	62.3411	65.0241	67.0155	69.3502	71.1708	74.1093	77.1498	79.6481	81.8725	85.2189	87.422	91.5074	95.4579	100.248	104.173	108.517	113.19
	56.2971	57.3205	56.8188	56.141	56.3035	55.1891	54.4568	54.3524	54.4127	54.8121	53.8339	54.6204	54.6413	55.6972	56.2323	55.8444	56.674	57.0399	57.6141	57.8321	57.9693	57.6834	58.9276	59.042	59.0217	57.548	58.4626	59.0699	61.1077	64.1126	66.5673	67.3896	72.7598	74.9539	78.7406	82.6483	86.0025	88.9613	93.3317	97.0334	100.784	104.181	107.171	111.851	115.049	120.657	124.338	127.863	131.812
	42.6216	42.8862	41.5243	41.8331	41.0995	40.2959	40.0358	39.0367	39.2362	39.4642	39.1272	39.5007	39.4423	40.1517	40.5561	39.9849	41.2143	40.8973	40.9512	41.7664	41.3813	41.8963	42.1291	42.1072	42.317	39.1992	40.2266	40.9248	41.1303	44.0014	45.0681	45.0444	48.3322	49.8009	52.1348	54.3634	56.1641	57.6454	59.2576	61.1963	61.8275	63.6267	64.7526	66.7761	69.3325	71.222	72.3262	75.2855	76.7543
	40.865	41.4362	40.798	40.497	39.8569	39.2124	38.619	38.1873	38.2327	38.5681	38.4283	39.1287	38.7084	39.2026	40.0383	39.6356	40.8181	40.4545	41.001	41.6845	41.4431	41.9196	41.9472	42.4871	42.7558	40.7395	42.4693	43.2786	44.1388	47.2384	49.3139	49.6596	53.9899	56.4757	58.8134	61.764	63.8214	66.4335	69.1514	71.4079	73.3339	75.9086	78.2045	81.0564	83.9635	87.2244	90.3593	93.6189	96.9198
	46.6753	46.8825	46.7368	46.2683	46.2702	45.4329	45.1266	43.481	43.8228	44.2252	43.9633	44.5187	44.3269	44.6968	45.558	45.2042	46.3274	46.4218	46.6133	47.1346	46.6354	47.3172	48.1513	47.8913	47.9051	47.654	49.0712	50.5163	52.3239	55.5173	58.6862	59.283	64.1452	66.6162	70.9511	74.521	77.8192	81.5707	86.3161	89.9397	93.5428	97.7169	101.041	105.284	110.889	116.057	120.546	125.879	130.693
	29.0009	27.3144	26.5308	25.7517	25.2405	25.4171	26.2227	26.2896	26.3498	26.5239	26.6918	27.484	27.5984	27.5033	27.2566	27.0952	26.5461	26.2581	27.0046	26.9021	25.6312	25.9771	25.1302	25.2421	25.2298	26.7341	27.366	28.7693	31.4917	32.9055	36.4309	38.8286	42.5537	46.9789	50.6848	55.3163	59.4429	64.2193	68.83	72.8023	76.5242	80.593	83.6238	86.012	90.8483	92.1253	94.4145	95.6544	96.5001
	14.2816	12.9906	11.883	11.1084	10.802	11.117	10.7371	11.7754	11.6362	11.8813	11.9729	12.4524	12.2505	12.6103	11.9777	12.3368	11.8965	12.1745	11.4712	11.741	10.8145	11.1152	10.9592	9.56857	10.3973	9.92589	10.2059	10.7143	13.228	12.4287	13.8674	15.0966	17.5152	20.2842	22.154	25.089	28.1524	31.1084	34.4635	37.5101	40.0462	42.8672	45.5326	48.0109	49.9423	51.9649	53.2897	53.9241	54.7357
	39.9639	38.0969	36.85	36.2956	36.0503	37.488	36.3125	37.6717	36.5186	36.7277	36.9535	37.987	37.7149	37.2911	33.5863	33.4342	31.7296	32.2636	31.7179	32.2426	31.6113	30.9258	31.637	30.8998	31.6424	33.9414	34.2478	36.3317	12.103	31.1741	34.1409	36.6913	40.0656	43.7583	46.8553	50.5765	55.523	59.7164	63.4972	67.2621	71.783	75.8595	80.4699	82.9063	86.5594	87.9527	91.1775	92.9769	95.6877
	16.926	15.2985	14.8084	13.6343	13.3194	13.5686	14.2103	14.6473	14.9023	14.8545	15.3148	16.0413	15.4306	15.1563	15.2227	15.3692	15.4304	14.782	14.5	14.6229	13.8076	13.7889	13.3093	13.3849	13.5811	14.5219	15.1794	16.0888	19.4519	17.828	20.3309	22.5089	24.1621	27.4187	29.8887	32.8661	35.8977	39.6368	43.0024	46.3953	50.3667	53.7386	56.7811	58.8804	61.9259	64.2803	66.0592	67.3758	68.3456
	15.9053	14.3958	13.5418	12.5846	12.7678	12.9804	13.4267	13.4355	13.6474	13.7513	13.9028	14.9461	14.5263	15.1215	14.6594	14.9002	15.0262	14.4758	14.0096	13.7747	13.3282	13.0499	13.0354	12.8084	12.5076	13.4783	13.2778	13.2987	14.2972	14.9829	16.0262	17.4411	18.9897	20.7516	22.2278	24.4709	26.8167	29.175	31.361	34.1889	36.2604	38.7735	40.5932	41.9044	44.82	46.2683	47.1016	48.6354	49.6885
	55.9486	54.0228	52.3364	51.8073	51.1815	51.5967	52.0955	51.95	51.8148	52.6817	52.7132	53.4805	52.2819	53.6185	52.0013	52.0254	51.9934	51.6785	50.7919	51.114	50.5475	49.9606	50.1435	49.7153	49.8982	51.8703	52.4533	54.184	55.5275	58.5317	61.8155	63.9577	67.7167	71.7208	75.4454	79.7344	84.9984	88.9795	93.5266	97.6089	101.522	105.347	109.691	111.893	116.228	118.311	120.628	122.594	124.51
	25.3285	23.8043	22.4456	21.5385	21.2285	21.3397	21.0866	22.4756	22.0963	22.9538	23.4676	24.9728	24.6349	24.908	22.7707	25.1972	23.8557	23.3628	22.8759	22.2294	22.5182	21.9092	21.3052	21.9845	21.7716	19.6703	19.1137	18.1457	17.4691	18.2209	19.859	20.4023	21.6507	23.881	24.7059	27.208	29.1577	31.2522	33.7118	35.9323	37.0097	38.5985	40.7408	41.6919	42.9816	44.5022	45.6013	45.5973	46.6126
	44.7908	42.9328	42.4892	40.4881	40.8177	40.7105	41.4082	41.5797	41.3927	42.0217	43.0381	43.6972	42.2744	43.0657	43.9398	44.4674	43.9249	43.3666	43.2966	43.0179	42.2893	41.3186	41.7959	41.1329	41.2561	42.5205	41.9062	42.1677	49.5341	46.3886	48.4902	49.9699	52.0196	54.1146	56.4259	59.2926	63.131	66.4642	68.868	71.9538	75.3721	78.2948	80.2013	82.6076	85.1243	88.0863	89.7026	91.6996	93.5637
	30.9692	28.9643	28.3795	27.7181	27.3566	27.8352	27.8828	27.696	28.4389	28.5585	28.8242	29.2441	29.2214	29.4048	28.9279	29.0145	28.9605	28.451	27.9714	27.8435	27.5733	27.1196	26.1884	26.5845	26.8423	26.8347	26.3841	26.8433	34.5566	29.3425	31.0473	31.7644	33.7326	35.5249	37.4519	39.8847	43.1514	46.2246	49.8789	52.4397	55.6968	58.947	61.6671	63.9221	66.8895	70.2494	72.5019	74.3821	75.7914
	25.1601	23.0814	22.548	21.863	20.9676	21.4483	22.1899	22.1434	22.2043	22.8777	22.6657	23.6187	23.4466	23.2444	23.026	23.4693	22.776	22.5548	22.1424	21.7517	20.9382	21.2307	21.2001	20.6995	21.184	19.8126	19.113	18.8603	18.4361	18.8238	19.4581	19.8049	21.3255	22.2741	23.8064	25.6624	27.9329	30.3954	32.0861	34.509	37.1453	38.9499	41.3791	42.9269	45.5972	47.2018	48.2876	50.3736	50.7846
	31.7812	29.9925	28.235	26.9772	27.1685	27.6406	27.2513	27.5123	28.4343	28.5565	29.3877	29.9364	29.0384	30.3753	28.3061	28.9093	28.1468	27.3763	27.2732	27.2418	26.8548	26.7214	26.7522	26.1189	25.7035	24.2208	23.7839	23.9268	22.861	23.8304	25.0583	25.6984	28.5285	29.8102	31.7239	35.3784	38.1986	40.2025	43.2646	47.4268	49.6056	51.9966	54.3879	57.2616	59.7593	61.9293	63.6074	65.0691	67.4581
	26.743	24.7886	24.1564	23.3551	23.3914	22.9972	23.5572	24.3936	24.4956	24.6946	25.0419	25.4744	25.0206	26.3341	26.0076	26.0732	26.4026	25.3849	25.3072	25.4926	23.9702	23.8755	23.9455	23.6906	24.3918	22.9931	22.4394	22.3909	28.6402	24.2081	25.5994	26.5154	27.1518	28.8064	30.1732	32.3914	34.2709	36.9622	38.6263	41.0907	43.0351	45.2446	48.0882	48.977	51.5262	53.0352	54.5223	56.0862	56.8822
	24.0029	22.1444	21.5704	20.9967	20.6431	20.715	21.4741	21.3631	21.9557	22.4505	22.8014	23.2702	23.2015	23.5377	23.3403	23.9087	23.6569	23.1919	22.9304	22.5015	21.9413	21.9845	21.7259	21.1006	21.2998	21.2798	21.133	21.1675	30.3332	24.1625	25.7787	26.6321	28.5738	30.6337	32.4861	35.0329	37.656	40.0721	42.9649	45.5562	48.0345	50.8798	52.8914	54.806	57.3962	59.1154	60.5885	61.4025	63.3351
	20.3672	18.5275	17.9376	17.2278	16.7621	17.695	17.8537	18.1339	18.574	18.9596	19.3154	19.8406	19.7504	20.2864	19.8638	19.8542	20.4412	19.8756	19.6529	19.3419	19.0432	18.4291	18.0088	18.1846	18.1924	19.6566	20.7025	21.6192	28.4363	25.925	28.446	30.2636	33.0505	36.3441	38.8876	42.0706	45.9464	49.0003	53.1335	55.4406	59.334	62.6718	65.307	67.9105	70.1736	72.8931	74.8672	76.2077	77.7271
	31.6787	29.7651	28.7079	28.5482	27.4035	27.9705	28.6931	28.3068	28.8118	29.8829	29.7226	30.2431	29.9387	30.625	29.7341	30.4736	30.5783	30.5339	29.0624	29.6705	28.8249	28.3056	28.4218	27.9412	27.8903	29.5506	29.3291	30.1441	32.2434	32.3477	34.5607	36.041	38.5875	41.6284	44.1576	46.783	49.8536	53.4032	56.2271	59.6716	62.2464	65.6817	68.563	71.1596	73.4033	75.2647	77.002	79.061	79.841
	53.4952	51.3502	49.9947	49.7689	49.5302	49.7663	50.4538	51.0827	50.873	51.6058	51.9893	52.8036	52.7711	53.4467	53.8856	54.2368	53.2023	53.2497	52.6373	52.399	50.9363	50.9013	51.0028	50.8154	50.6432	48.0802	47.3004	48.1344	46.6629	51.2652	53.041	54.0048	56.5639	58.8003	61.9426	64.4319	67.9317	70.7533	74.1427	76.311	79.6307	82.9293	85.5027	87.9281	90.3545	92.3595	93.4482	95.9282	97.3152
	68.2289	66.051	65.6695	64.7802	64.9417	65.8916	66.781	67.3024	67.6148	68.0519	68.0193	69.9618	69.7838	69.9148	70.6808	70.8815	70.2344	70.0186	69.3117	69.0487	68.0688	67.7426	67.6823	67.0426	67.3587	69.4443	68.6567	68.8081	67.9185	73.8228	75.9269	76.1752	77.7325	79.6753	82.0527	84.8149	87.7866	90.0819	94.273	96.6091	99.5528	103.214	106.43	108.491	111.86	114.147	115.505	118.354	118.464
	49.6233	47.7986	46.8124	45.4556	45.8245	46.2051	46.3492	46.7895	47.1556	47.7949	47.7907	48.4256	49.4438	48.821	47.2088	47.1692	46.9653	46.8258	46.4957	46.1254	46.1326	44.9819	45.0425	44.3095	44.6174	50.2697	49.3415	48.5139	55.8903	43.5634	43.5297	43.4401	44.7545	45.7121	46.14	47.4069	49.4247	50.4442	52.4205	53.6115	55.2427	56.8138	58.2575	59.0723	60.734	61.4525	61.7399	61.1559	60.4515
	25.8401	24.5238	22.9322	22.5381	21.7246	22.1317	22.7238	23.3501	22.9108	23.9426	24.6925	24.281	23.9569	24.6388	24.5698	24.4578	23.6076	23.6328	22.9462	22.8803	21.8274	22.6116	22.0424	22.0266	21.3395	21.3968	20.9009	19.9715	19.2011	21.5693	21.7268	22.1854	24.0043	25.4191	26.9643	28.9423	31.4372	33.6246	35.4046	37.8621	40.3478	41.9566	45.7006	46.773	49.396	51.5724	53.1529	55.4121	56.3079
Time (s)	0	2	4	6	8	10	12	14	16	18	20	22	24	26	28	30	32	34	36	38	40	42	44	46	48	50	52	54	56	58	60	62	64	66	68	70	72	74	76	78	80	82	84	86	88	90	92	94	96
[truncated: 277 more columns]
